# Supplementary material for: Reward sensitivity and internalizing symptoms during the transition to puberty: An examination of 9-and 10-year-olds in the ABCD Study
Source: PubMed Central journal article supplement (PMC9649995; doi:10.1016/j.dcn.2022.101172), 2022-10-31
Supplement: mmc1.pdf [file mmc1.pdf]

# Supplement A

Reward sensitivity and internalizing symptoms during the transition to puberty: An examination of 9- and 10-year-olds in the ABCD Study.

## Contents

|                                                                    |          |
|--------------------------------------------------------------------|----------|
| <b>Results for Sample 1</b>                                        | <b>9</b> |
| <b>1—Internalizing-Puberty—</b>                                    | <b>9</b> |
| 1.1 Model: CBCL internalizing factor ~ PDS . . . . .               | 9        |
| Female participants . . . . .                                      | 9        |
| Male participants . . . . .                                        | 9        |
| 1.2 Model: CBCL Anxious-Depressed ~ PDS . . . . .                  | 10       |
| Female participants . . . . .                                      | 10       |
| Male participants . . . . .                                        | 11       |
| 1.3 Model: CBCL Withdrawn-Depressed ~ PDS . . . . .                | 12       |
| Female participants . . . . .                                      | 12       |
| Male participants . . . . .                                        | 12       |
| 1.4 Model: CBCL Depressed DSM-5 ~ PDS . . . . .                    | 13       |
| Female participants . . . . .                                      | 13       |
| Male participants . . . . .                                        | 14       |
| 1.5 Model: CBCL internalizing factor ~ Pubertal category . . . . . | 14       |
| Female participants . . . . .                                      | 14       |
| Male participants . . . . .                                        | 15       |
| 1.6 Model: CBCL Anxious-Depressed ~ Pubertal category . . . . .    | 16       |
| Female participants . . . . .                                      | 16       |
| Male participants . . . . .                                        | 17       |
| 1.7 Model: CBCL Withdrawn-Depressed ~ Pubertal category . . . . .  | 18       |
| Female participants . . . . .                                      | 18       |
| Male participants . . . . .                                        | 18       |
| 1.8 Model: CBCL Depressed DSM-5 ~ Pubertal category . . . . .      | 19       |
| Female participants . . . . .                                      | 19       |
| Male participants . . . . .                                        | 20       |

|                                                                                    |    |
|------------------------------------------------------------------------------------|----|
| 1.9 Model: CBCL internalizing factor ~ Testosterone . . . . .                      | 21 |
| Female participants . . . . .                                                      | 21 |
| Male participants . . . . .                                                        | 22 |
| 1.10 Model: CBCL Anxious-Depressed ~ Testosterone . . . . .                        | 22 |
| Female participants . . . . .                                                      | 22 |
| Male participants . . . . .                                                        | 23 |
| 1.11 Model: CBCL Withdrawn-Depressed ~ Testosterone . . . . .                      | 24 |
| Female participants . . . . .                                                      | 24 |
| Male participants . . . . .                                                        | 24 |
| 1.12 Model: CBCL Depressed DSM-5 ~ Testosterone . . . . .                          | 25 |
| Female participants . . . . .                                                      | 25 |
| Male participants . . . . .                                                        | 26 |
| 1.13 Model: CBCL internalizing factor ~ Testosterone + PDS . . . . .               | 27 |
| Female participants . . . . .                                                      | 27 |
| Male participants . . . . .                                                        | 27 |
| 1.14 Model: CBCL internalizing factor ~ Testosterone + Pubertal category . . . . . | 28 |
| Female participants . . . . .                                                      | 28 |
| Male participants . . . . .                                                        | 29 |
| 1.15 Model: CBCL Anxious-Depressed ~ Testosterone + PDS . . . . .                  | 30 |
| Female participants . . . . .                                                      | 30 |
| Male participants . . . . .                                                        | 30 |
| 1.16 Model: CBCL Anxious-Depressed ~ Testosterone + Pubertal category . . . . .    | 31 |
| Female participants . . . . .                                                      | 31 |
| Male participants . . . . .                                                        | 32 |
| 1.17 Model: CBCL Withdrawn-Depressed ~ Testosterone + PDS . . . . .                | 33 |
| Female participants . . . . .                                                      | 33 |
| Male participants . . . . .                                                        | 34 |
| 1.18 Model: CBCL Withdrawn-Depressed ~ Testosterone + Pubertal category . . . . .  | 34 |
| Female participants . . . . .                                                      | 34 |
| Male participants . . . . .                                                        | 35 |
| 1.19 Model: CBCL Depressed DSM-5 ~ Testosterone + PDS . . . . .                    | 36 |
| Female participants . . . . .                                                      | 36 |
| Male participants . . . . .                                                        | 37 |
| 1.20 Model: CBCL Depressed DSM-5 ~ Testosterone + Pubertal category . . . . .      | 38 |
| Female participants . . . . .                                                      | 38 |
| Male participants . . . . .                                                        | 38 |

|                                                             |           |
|-------------------------------------------------------------|-----------|
| <b>2—Reward~Puberty—</b>                                    | <b>40</b> |
| 2.1 Model: BIS-BAS-RR ~ PDS . . . . .                       | 40        |
| Female participants . . . . .                               | 40        |
| Male participants . . . . .                                 | 40        |
| 2.2 Model : Reaction Time ~ PDS . . . . .                   | 41        |
| Female participants . . . . .                               | 41        |
| Male participants . . . . .                                 | 42        |
| 2.3 Model: Caudate Anticipation ~ PDS . . . . .             | 42        |
| Female participants . . . . .                               | 42        |
| Male participants . . . . .                                 | 43        |
| 2.4 Model B: Putamen Anticipation ~ PDS . . . . .           | 43        |
| Female participants . . . . .                               | 43        |
| Male participants . . . . .                                 | 44        |
| 2.5 Model: Accumbens Anticipation ~ PDS . . . . .           | 44        |
| Female participants . . . . .                               | 44        |
| Male participants . . . . .                                 | 45        |
| 2.6 Model: Caudate Feedback ~ PDS . . . . .                 | 45        |
| Female participants . . . . .                               | 45        |
| Male participants . . . . .                                 | 46        |
| 2.7 Model: Putamen Feedback ~ PDS . . . . .                 | 46        |
| Female participants . . . . .                               | 46        |
| Male participants . . . . .                                 | 47        |
| 2.8 Model: Accumbens Feedback ~ PDS . . . . .               | 47        |
| Female participants . . . . .                               | 47        |
| Male participants . . . . .                                 | 48        |
| 2.9 Model: OFC Anticipation ~ PDS . . . . .                 | 48        |
| Female participants . . . . .                               | 48        |
| Male participants . . . . .                                 | 49        |
| 2.10 Model: OFC Feedback ~ PDS . . . . .                    | 50        |
| Female participants . . . . .                               | 50        |
| Male participants . . . . .                                 | 51        |
| 2.11 Model: Caudate Anticipation ~ Testosterone . . . . .   | 52        |
| Female participants . . . . .                               | 52        |
| Male participants . . . . .                                 | 53        |
| 2.12 Model B: Putamen Anticipation ~ Testosterone . . . . . | 53        |
| Female participants . . . . .                               | 53        |

|                                                                                                  |           |
|--------------------------------------------------------------------------------------------------|-----------|
| Male participants . . . . .                                                                      | 53        |
| 2.13 Model: Accumbens Anticipation ~ Testosterone . . . . .                                      | 54        |
| Female participants . . . . .                                                                    | 54        |
| Male participants . . . . .                                                                      | 54        |
| 2.14 Model: Caudate Feedback ~ Testosterone . . . . .                                            | 55        |
| Female participants . . . . .                                                                    | 55        |
| Male participants . . . . .                                                                      | 55        |
| 2.15 Model: Putamen Feedback ~ Testosterone . . . . .                                            | 56        |
| Female participants . . . . .                                                                    | 56        |
| Male participants . . . . .                                                                      | 56        |
| 2.16 Model: Accumbens Feedback ~ Testosterone . . . . .                                          | 57        |
| Female participants . . . . .                                                                    | 57        |
| Male participants . . . . .                                                                      | 57        |
| 2.17 Model: OFC Anticipation ~ Testosterone . . . . .                                            | 58        |
| Female participants . . . . .                                                                    | 58        |
| Male participants . . . . .                                                                      | 59        |
| 2.18 Model: OFC Feedback ~ Testosterone . . . . .                                                | 60        |
| Female participants . . . . .                                                                    | 60        |
| Male participants . . . . .                                                                      | 61        |
| 2.19 Model: MID Reaction Time ~ Testosterone . . . . .                                           | 62        |
| Female participants . . . . .                                                                    | 62        |
| Male participants . . . . .                                                                      | 63        |
| 2.20 Model: BIS-BAS-RR ~ Testosterone . . . . .                                                  | 63        |
| Female participants . . . . .                                                                    | 63        |
| Male participants . . . . .                                                                      | 64        |
| <b>3—Internalizing~Reward—</b>                                                                   | <b>65</b> |
| 3.1 Model: CBCL internalizing factor ~ Nucleus Accumbens activity (anticipation stage) . . . . . | 65        |
| Female participants . . . . .                                                                    | 65        |
| Male participants . . . . .                                                                      | 65        |
| 3.2 Model: CBCL internalizing factor ~ Caudate activity (anticipation stage) . . . . .           | 66        |
| Female participants . . . . .                                                                    | 66        |
| Male participants . . . . .                                                                      | 66        |
| 3.3 Model: CBCL internalizing factor ~ Putamen activity (anticipation stage) . . . . .           | 67        |
| Female participants . . . . .                                                                    | 67        |
| Male participants . . . . .                                                                      | 67        |
| 3.4 Model: CBCL internalizing factor ~ Accumbens activity (feedback stage) . . . . .             | 68        |

|                                                                                                  |           |
|--------------------------------------------------------------------------------------------------|-----------|
| Female participants . . . . .                                                                    | 68        |
| Male participants . . . . .                                                                      | 68        |
| 3.5 Model: CBCL internalizing factor ~ Caudate activity (feedback stage) . . . . .               | 69        |
| Female participants . . . . .                                                                    | 69        |
| Male participants . . . . .                                                                      | 69        |
| 3.6 Model: CBCL internalizing factor ~ Putamen activity (feedback stage) . . . . .               | 70        |
| Female participants . . . . .                                                                    | 70        |
| Male participants . . . . .                                                                      | 70        |
| 3.7 Model: CBCL internalizing factor ~ OFC activity (anticipation stage) . . . . .               | 71        |
| Female participants . . . . .                                                                    | 71        |
| Male participants . . . . .                                                                      | 72        |
| 3.8 Model: CBCL internalizing factor ~ OFC activity (feedback stage) . . . . .                   | 73        |
| Female participants . . . . .                                                                    | 73        |
| Male participants . . . . .                                                                      | 74        |
| 3.9 Model: CBCL internalizing factor ~ BIS-BAS-RR . . . . .                                      | 75        |
| Female participants . . . . .                                                                    | 75        |
| Male participants . . . . .                                                                      | 75        |
| 3.10 Model: CBCL internalizing factor ~ MID Reaction Time . . . . .                              | 76        |
| Female participants . . . . .                                                                    | 76        |
| Male participants . . . . .                                                                      | 77        |
| <b>4—Internalizing~Puberty x Reward—</b>                                                         | <b>78</b> |
| 4.1 Model: CBCL internalizing factor ~ PDS x Accumbens activity (anticipation stage) . . . . .   | 78        |
| Female participants . . . . .                                                                    | 78        |
| Male participants . . . . .                                                                      | 78        |
| 4.2 Model: CBCL internalizing factor ~ PDS x Caudate activity (anticipation stage) . . . . .     | 79        |
| Female participants . . . . .                                                                    | 79        |
| Male participants . . . . .                                                                      | 80        |
| 4.3 Model: CBCL internalizing factor ~ PDS x Putamen activity (anticipation stage) . . . . .     | 81        |
| Female participants . . . . .                                                                    | 81        |
| Male participants . . . . .                                                                      | 82        |
| 4.4 Model: CBCL internalizing factor ~ PDS x Lateral OFC activity (anticipation stage) . . . . . | 82        |
| Female participants . . . . .                                                                    | 82        |
| Male participants . . . . .                                                                      | 83        |
| 4.5 Model: CBCL internalizing factor ~ PDS x Medial OFC activity (anticipation stage) . . . . .  | 84        |
| Female participants . . . . .                                                                    | 84        |
| Male participants . . . . .                                                                      | 85        |

|                                                                                                      |     |
|------------------------------------------------------------------------------------------------------|-----|
| 4.6 Model: CBCL internalizing factor ~ PDS x Accumbens activity (feedback)                           | 86  |
| Female participants                                                                                  | 86  |
| Male participants                                                                                    | 87  |
| 4.7 Model: CBCL internalizing factor ~ PDS x Caudate activity (feedback)                             | 88  |
| Female participants                                                                                  | 88  |
| Male participants                                                                                    | 88  |
| 4.8 Model: CBCL internalizing factor ~ PDS x Putamen activity (feedback)                             | 89  |
| Female participants                                                                                  | 89  |
| Male participants                                                                                    | 90  |
| 4.9 Model: CBCL internalizing factor ~ PDS x Lateral OFC activity (feedback stage)                   | 91  |
| Female participants                                                                                  | 91  |
| Male participants                                                                                    | 92  |
| 4.10 Model: CBCL internalizing factor ~ PDS x Medial OFC activity (feedback stage)                   | 92  |
| Female participants                                                                                  | 92  |
| Male participants                                                                                    | 93  |
| 4.11 Model: CBCL internalizing factor ~ PDS x BIS-BAS                                                | 94  |
| Female participants                                                                                  | 94  |
| Male participants                                                                                    | 95  |
| 4.12 Model: CBCL internalizing factor ~ PDS x MID reaction time (large reward vs. neutral)           | 96  |
| Female participants                                                                                  | 96  |
| Male participants                                                                                    | 96  |
| 4.13 Model: CBCL internalizing factor ~ PDS x MID reaction time (large vs. small reward)             | 97  |
| Female participants                                                                                  | 97  |
| Male participants                                                                                    | 98  |
| 4.14 Model: CBCL internalizing factor ~ Testosterone x Accumbens activity (anticipation stage) + PDS | 99  |
| Female participants                                                                                  | 99  |
| Male participants                                                                                    | 100 |
| 4.15 Model: CBCL internalizing factor ~ Testosterone x Caudate activity (anticipation stage) + PDS   | 101 |
| Female participants                                                                                  | 101 |
| Male participants                                                                                    | 102 |
| 4.16 Model: CBCL internalizing factor ~ Testosterone x Putamen activity (anticipation stage) + PDS   | 103 |
| Female participants                                                                                  | 103 |
| Male participants                                                                                    | 104 |
| 4.17 Model: CBCL internalizing factor ~ Testosterone x Accumbens activity (feedback stage) + PDS     | 105 |
| Female participants                                                                                  | 105 |

|                                                                                                                     |            |
|---------------------------------------------------------------------------------------------------------------------|------------|
| Male participants . . . . .                                                                                         | 106        |
| 4.18 Model: CBCL internalizing factor ~ Testosterone x Caudate activity (Feedback stage) + PDS                      | 108        |
| Female participants . . . . .                                                                                       | 108        |
| Male participants . . . . .                                                                                         | 109        |
| 4.19 Model: CBCL internalizing factor ~ Testosterone x Putamen activity (Feedback stage) + PDS                      | 110        |
| Female participants . . . . .                                                                                       | 110        |
| Male participants . . . . .                                                                                         | 111        |
| 4.20 Model: CBCL internalizing factor ~ Testosterone x Lateral OFC activity (anticipation stage) + PDS . . . . .    | 112        |
| Female participants . . . . .                                                                                       | 112        |
| Male participants . . . . .                                                                                         | 113        |
| 4.21 Model: CBCL internalizing factor ~ Testosterone x Medial OFC activity (anticipation stage) + PDS . . . . .     | 114        |
| Female participants . . . . .                                                                                       | 114        |
| Male participants . . . . .                                                                                         | 114        |
| 4.22 Model: CBCL internalizing factor ~ Testosterone x Lateral OFC activity (feedback stage) + PDS . . . . .        | 115        |
| Female participants . . . . .                                                                                       | 115        |
| Male participants . . . . .                                                                                         | 116        |
| 4.23 Model: CBCL internalizing factor ~ Testosterone x Medial OFC activity (feedback stage) + PDS . . . . .         | 117        |
| Female participants . . . . .                                                                                       | 117        |
| Male participants . . . . .                                                                                         | 119        |
| 4.24 Model: CBCL internalizing factor ~ Testosterone x BIS-BAS RR + PDS . . . . .                                   | 120        |
| Female participants . . . . .                                                                                       | 120        |
| Male participants . . . . .                                                                                         | 121        |
| 4.25 Model: CBCL internalizing factor ~ Testosterone x MID Reaction Time + PDS (large reward vs. neutral) . . . . . | 122        |
| Female participants . . . . .                                                                                       | 122        |
| Male participants . . . . .                                                                                         | 123        |
| 4.26 Model: CBCL internalizing factor ~ Testosterone x MID Reaction Time + PDS (large vs. small reward) . . . . .   | 124        |
| Female participants . . . . .                                                                                       | 124        |
| Male participants . . . . .                                                                                         | 125        |
| <b>5— Correlation Matrix —</b>                                                                                      | <b>128</b> |
| Female participants . . . . .                                                                                       | 128        |
| Male participants . . . . .                                                                                         | 129        |

|                                                                       |            |
|-----------------------------------------------------------------------|------------|
| <b>6— Compare Outliers to Non-Outliers on Demographic Variables —</b> | <b>130</b> |
| Female participants . . . . .                                         | 130        |
| Male participants . . . . .                                           | 130        |



# Results for Sample 1

## 1—Internalizing~Puberty—

### 1.1 Model: CBCL internalizing factor ~ PDS

#### Female participants

```
##
## Family: gaussian
## Link function: identity
##
## Formula:
## cbcl_scr_syn_internal_r ~ PDS_score + race.ethnicity.5level +
##   interview_age + demo_race_hispanic
##
## Parametric coefficients:
##               Estimate Std. Error t value Pr(>|t|)
## (Intercept)    3.364047   1.858610   1.810 0.070413 .
## PDS_score       0.599362   0.157687   3.801 0.000147 ***
## race.ethnicity.5levelBlack 0.135086   0.792591   0.170 0.864681
## race.ethnicity.5levelMixed 1.837143   0.789510   2.327 0.020044 *
## race.ethnicity.5levelOther 2.439633   0.901292   2.707 0.006837 **
## race.ethnicity.5levelWhite 1.354995   0.742020   1.826 0.067950 .
## interview_age  -0.005834   0.014591  -0.400 0.689307
## demo_race_hispanic1 0.216061   0.316107   0.684 0.494348
## ---
## Signif. codes:  0 '***' 0.001 '**' 0.01 '*' 0.05 '.' 0.1 ' ' 1
##
##
## R-sq.(adj) =  0.0121
## lmer.REML = 16403  Scale est. = 13.201    n = 2640

##               stdcoef      stdse
## X(Intercept)    0.000000000 0.00000000
## XPDS_score      0.079678274 0.02096269
## Xrace.ethnicity.5levelBlack 0.008788022 0.05156209
## Xrace.ethnicity.5levelMixed 0.111225638 0.04779910
## Xrace.ethnicity.5levelOther 0.093887511 0.03468556
## Xrace.ethnicity.5levelWhite 0.116925862 0.06403075
## Xinterview_age  -0.007909539 0.01978176
## Xdemo_race_hispanic1 0.015489194 0.02266145
```

#### Male participants

```
##
## Family: gaussian
## Link function: identity
##
## Formula:
## cbcl_scr_syn_internal_r ~ PDS_score + race.ethnicity.5level +
##   interview_age + demo_race_hispanic
```

```

##
## Parametric coefficients:
##               Estimate Std. Error t value Pr(>|t|)
## (Intercept)      2.2482183   1.7777137   1.265  0.20609
## PDS_score        0.8330124   0.1980430   4.206 2.68e-05 ***
## race.ethnicity.5levelBlack 1.3769789   0.7417729   1.856  0.06351 .
## race.ethnicity.5levelMixed 2.0936563   0.7432047   2.817  0.00488 **
## race.ethnicity.5levelOther 1.9471613   0.8510452   2.288  0.02221 *
## race.ethnicity.5levelWhite 1.5406055   0.6957503   2.214  0.02689 *
## interview_age     0.0000239   0.0139517   0.002  0.99863
## demo_race_hispanic1 0.2444236   0.3000757   0.815  0.41540
## ---
## Signif. codes:  0 '***' 0.001 '**' 0.01 '*' 0.05 '.' 0.1 ' ' 1
##
##
## R-sq.(adj) =  0.00708
## lmer.REML = 17769  Scale est. = 15.936   n = 2857

##               stdcoef      stdse
## X(Intercept)      0.000000e+00 0.00000000
## XPDS_score        8.290960e-02 0.01971119
## Xrace.ethnicity.5levelBlack 8.865125e-02 0.04775606
## Xrace.ethnicity.5levelMixed 1.244315e-01 0.04417061
## Xrace.ethnicity.5levelOther 7.605182e-02 0.03323995
## Xrace.ethnicity.5levelWhite 1.328003e-01 0.05997373
## Xinterview_age     3.256634e-05 0.01901086
## Xdemo_race_hispanic1 1.766394e-02 0.02168579

```

## 1.2 Model: CBCL Anxious-Depressed ~ PDS

### Female participants

```

##
## Family: gaussian
## Link function: identity
##
## Formula:
## cbcl_scr_syn_anxdep_r ~ PDS_score + race.ethnicity.5level + interview_age +
##   demo_race_hispanic
##
## Parametric coefficients:
##               Estimate Std. Error t value Pr(>|t|)
## (Intercept)      1.738267   1.046826   1.661  0.0969 .
## PDS_score        0.192989   0.088633   2.177  0.0295 *
## race.ethnicity.5levelBlack 0.034518   0.442769   0.078  0.9379
## race.ethnicity.5levelMixed 0.899818   0.441294   2.039  0.0415 *
## race.ethnicity.5levelOther 0.960117   0.504377   1.904  0.0571 .
## race.ethnicity.5levelWhite 0.798545   0.414637   1.926  0.0542 .
## interview_age    -0.002110   0.008232  -0.256  0.7977
## demo_race_hispanic1 0.024025   0.176180   0.136  0.8915
## ---
## Signif. codes:  0 '***' 0.001 '**' 0.01 '*' 0.05 '.' 0.1 ' ' 1
##

```

```
##
## R-sq.(adj) = 0.00724
## lmer.REML = 13376 Scale est. = 4.9862 n = 2640

##                stdcoef      stdse
## X(Intercept)    0.00000000 0.00000000
## XPDS_score      0.045939845 0.02109848
## Xrace.ethnicity.5levelBlack 0.004021024 0.05157799
## Xrace.ethnicity.5levelMixed 0.097548974 0.04784057
## Xrace.ethnicity.5levelOther 0.066162685 0.03475717
## Xrace.ethnicity.5levelWhite 0.123389443 0.06406881
## Xinterview_age  -0.005121910 0.01998372
## Xdemo_race_hispanic1 0.003084070 0.02261604
```

### Male participants

```
##
## Family: gaussian
## Link function: identity
##
## Formula:
## cbcl_scr_syn_anxdep_r ~ PDS_score + race.ethnicity.5level + interview_age +
##      demo_race_hispanic
##
## Parametric coefficients:
##              Estimate Std. Error t value Pr(>|t|)
## (Intercept)    1.306805   0.993565   1.315 0.188526
## PDS_score       0.415851   0.110411   3.766 0.000169 ***
## race.ethnicity.5levelBlack 0.620939   0.413367   1.502 0.133169
## race.ethnicity.5levelMixed 1.145179   0.414451   2.763 0.005762 **
## race.ethnicity.5levelOther 1.102178   0.473648   2.327 0.020035 *
## race.ethnicity.5levelWhite 1.048098   0.388072   2.701 0.006959 **
## interview_age  -0.003231   0.007798  -0.414 0.678696
## demo_race_hispanic1 0.097781   0.166098   0.589 0.556111
## ---
## Signif. codes:  0 '***' 0.001 '**' 0.01 '*' 0.05 '.' 0.1 ' ' 1
##
##
## R-sq.(adj) = 0.00662
## lmer.REML = 14455 Scale est. = 6.6672 n = 2857

##                stdcoef      stdse
## X(Intercept)    0.00000000 0.00000000
## XPDS_score      0.074413531 0.01975724
## Xrace.ethnicity.5levelBlack 0.071873260 0.04784694
## Xrace.ethnicity.5levelMixed 0.122365648 0.04428523
## Xrace.ethnicity.5levelOther 0.077396393 0.03326020
## Xrace.ethnicity.5levelWhite 0.162431737 0.06014250
## Xinterview_age  -0.007914842 0.01910478
## Xdemo_race_hispanic1 0.012704624 0.02158092
```

### 1.3 Model: CBCL Withdrawn-Depressed ~ PDS

#### Female participants

```
##
## Family: gaussian
## Link function: identity
##
## Formula:
## cbcl_scr_syn_withdep_r ~ PDS_score + race.ethnicity.5level +
##   interview_age + demo_race_hispanic
##
## Parametric coefficients:
##               Estimate Std. Error t value Pr(>|t|)
## (Intercept)    0.560842   0.544323   1.030  0.3029
## PDS_score      0.192902   0.046013   4.192 2.85e-05 ***
## race.ethnicity.5levelBlack 0.185794   0.228387   0.814  0.4160
## race.ethnicity.5levelMixed 0.401589   0.227843   1.763  0.0781 .
## race.ethnicity.5levelOther 0.569861   0.260772   2.185  0.0290 *
## race.ethnicity.5levelWhite 0.218364   0.213975   1.021  0.3076
## interview_age  -0.002093   0.004288  -0.488  0.6254
## demo_race_hispanic1  0.175618   0.090490   1.941  0.0524 .
## ---
## Signif. codes:  0 '***' 0.001 '**' 0.01 '*' 0.05 '.' 0.1 ' ' 1
##
##
## R-sq.(adj) =  0.0126
## lmer.REML = 9937.2  Scale est. = 1.6344    n = 2640

##               stdcoef      stdse
## X(Intercept)    0.000000000 0.000000000
## XPDS_score      0.088652509 0.02114652
## Xrace.ethnicity.5levelBlack 0.041784681 0.05136371
## Xrace.ethnicity.5levelMixed 0.084051987 0.04768728
## Xrace.ethnicity.5levelOther 0.075815285 0.03469358
## Xrace.ethnicity.5levelWhite 0.065141430 0.06383239
## Xinterview_age  -0.009811582 0.02009505
## Xdemo_race_hispanic1  0.043523846 0.02242636
```

#### Male participants

```
##
## Family: gaussian
## Link function: identity
##
## Formula:
## cbcl_scr_syn_withdep_r ~ PDS_score + race.ethnicity.5level +
##   interview_age + demo_race_hispanic
##
## Parametric coefficients:
##               Estimate Std. Error t value Pr(>|t|)
## (Intercept)    0.4274730  0.5591341   0.765  0.44462
## PDS_score      0.1832599  0.0624677   2.934  0.00338 **
```

```

## race.ethnicity.5levelBlack  0.5744953  0.2317862  2.479  0.01325 *
## race.ethnicity.5levelMixed  0.6118766  0.2336103  2.619  0.00886 **
## race.ethnicity.5levelOther  0.4630515  0.2673162  1.732  0.08334 .
## race.ethnicity.5levelWhite  0.3813838  0.2176813  1.752  0.07988 .
## interview_age                -0.0002625  0.0044008  -0.060  0.95244
## demo_race_hispanic1         0.0296570  0.0889215  0.334  0.73877
## ---
## Signif. codes:  0 '***' 0.001 '**' 0.01 '*' 0.05 '.' 0.1 ' ' 1
##
##
## R-sq.(adj) =  0.00628
## lmer.REML = 11223  Scale est. = 2.0769    n = 2857

##                stdcoef      stdse
## X(Intercept)    0.000000000 0.00000000
## XPDS_score      0.057881582 0.01973005
## Xrace.ethnicity.5levelBlack 0.117371769 0.04735488
## Xrace.ethnicity.5levelMixed 0.115400683 0.04405920
## Xrace.ethnicity.5levelOther 0.057392691 0.03313237
## Xrace.ethnicity.5levelWhite 0.104325279 0.05954541
## Xinterview_age  -0.001135110 0.01902957
## Xdemo_race_hispanic1      0.006801293 0.02039251

```

## 1.4 Model: CBCL Depressed DSM-5 ~ PDS

### Female participants

```

##
## Family: gaussian
## Link function: identity
##
## Formula:
## cbcl_scr_dsm5_depress_r ~ PDS_score + race.ethnicity.5level +
##   interview_age + demo_race_hispanic
##
## Parametric coefficients:
##                Estimate Std. Error t value Pr(>|t|)
## (Intercept)    0.500757  0.632217  0.792 0.428394
## PDS_score      0.191889  0.053684  3.574 0.000357 ***
## race.ethnicity.5levelBlack 0.220848  0.266590  0.828 0.407508
## race.ethnicity.5levelMixed 0.677402  0.266390  2.543 0.011051 *
## race.ethnicity.5levelOther 0.837469  0.304982  2.746 0.006075 **
## race.ethnicity.5levelWhite 0.519547  0.249759  2.080 0.037604 *
## interview_age  -0.001794  0.004979  -0.360 0.718640
## demo_race_hispanic1      0.107590  0.104881  1.026 0.305064
## ---
## Signif. codes:  0 '***' 0.001 '**' 0.01 '*' 0.05 '.' 0.1 ' ' 1
##
##
## R-sq.(adj) =  0.0102
## lmer.REML = 10738  Scale est. = 1.7625    n = 2640

##                stdcoef      stdse

```

```

## X(Intercept)          0.00000000 0.00000000
## XPDS_score           0.075266482 0.02105703
## Xrace.ethnicity.5levelBlack 0.042391288 0.05117131
## Xrace.ethnicity.5levelMixed 0.121006828 0.04758623
## Xrace.ethnicity.5levelOther 0.095094061 0.03463058
## Xrace.ethnicity.5levelWhite 0.132281618 0.06359093
## Xinterview_age       -0.007176567 0.01991746
## Xdemo_race_hispanic1 0.022757644 0.02218454

```

## Male participants

```

##
## Family: gaussian
## Link function: identity
##
## Formula:
## cbcl_scr_dsm5_depress_r ~ PDS_score + race.ethnicity.5level +
##   interview_age + demo_race_hispanic
##
## Parametric coefficients:
##              Estimate Std. Error t value Pr(>|t|)
## (Intercept)   0.4722037  0.6825704   0.692  0.48912
## PDS_score     0.2264040  0.0760462   2.977  0.00293 **
## race.ethnicity.5levelBlack 0.4987411  0.2837433   1.758  0.07890 .
## race.ethnicity.5levelMixed 0.6664847  0.2849801   2.339  0.01942 *
## race.ethnicity.5levelOther 0.5841449  0.3259736   1.792  0.07324 .
## race.ethnicity.5levelWhite 0.5031305  0.2663922   1.889  0.05904 .
## interview_age 0.0007043  0.0053641   0.131  0.89555
## demo_race_hispanic1 -0.0466581  0.1125717  -0.414  0.67856
## ---
## Signif. codes:  0 '***' 0.001 '**' 0.01 '*' 0.05 '.' 0.1 ' ' 1
##
##
## R-sq.(adj) =  0.00279
## lmer.REML = 12329  Scale est. = 2.9436    n = 2857

##              stdcoef      stdse
## X(Intercept)   0.00000000 0.00000000
## XPDS_score     0.058929927 0.01979381
## Xrace.ethnicity.5levelBlack 0.083971353 0.04777291
## Xrace.ethnicity.5levelMixed 0.103588984 0.04429329
## Xrace.ethnicity.5levelOther 0.059665969 0.03329573
## Xrace.ethnicity.5levelWhite 0.113419240 0.06005202
## Xinterview_age 0.002509707 0.01911496
## Xdemo_race_hispanic1 -0.008818003 0.02127513

```

## 1.5 Model: CBCL internalizing factor ~ Pubertal category

### Female participants

```

##
## Family: gaussian

```

```

## Link function: identity
##
## Formula:
## cbcl_scr_syn_internal_r ~ pds_p_ss_category + race.ethnicity.5level +
##   interview_age + demo_race_hispanic
##
## Parametric coefficients:
##               Estimate Std. Error t value Pr(>|t|)
## (Intercept)      4.19492    1.89422   2.215 0.026873 *
## pds_p_ss_categoryEarly  1.04585    0.28906   3.618 0.000302 ***
## pds_p_ss_categoryLate   1.70710    0.71494   2.388 0.017023 *
## pds_p_ss_categoryMid    1.20889    0.27421   4.409 1.08e-05 ***
## race.ethnicity.5levelBlack 0.19295    0.79221   0.244 0.807589
## race.ethnicity.5levelMixed 1.90499    0.78883   2.415 0.015805 *
## race.ethnicity.5levelOther 2.49651    0.89969   2.775 0.005562 **
## race.ethnicity.5levelWhite 1.42253    0.74138   1.919 0.055123 .
## interview_age        -0.01158    0.01481  -0.782 0.434254
## demo_race_hispanic1    0.14868    0.31697   0.469 0.639063
## ---
## Signif. codes:  0 '***' 0.001 '**' 0.01 '*' 0.05 '.' 0.1 ' ' 1
##
##
## R-sq.(adj) =  0.0143
## lmer.REML = 16394  Scale est. = 13.028    n = 2640

##               stdcoef      stdse
## X(Intercept)      0.00000000 0.00000000
## Xpds_p_ss_categoryEarly  0.08060431 0.02227793
## Xpds_p_ss_categoryLate   0.04811159 0.02014948
## Xpds_p_ss_categoryMid    0.10804785 0.02450813
## Xrace.ethnicity.5levelBlack 0.01255255 0.05153739
## Xrace.ethnicity.5levelMixed 0.11533323 0.04775786
## Xrace.ethnicity.5levelOther 0.09607645 0.03462406
## Xrace.ethnicity.5levelWhite 0.12275348 0.06397543
## Xinterview_age        -0.01569732 0.02007197
## Xdemo_race_hispanic1    0.01065867 0.02272329

```

## Male participants

```

##
## Family: gaussian
## Link function: identity
##
## Formula:
## cbcl_scr_syn_internal_r ~ pds_p_ss_category + race.ethnicity.5level +
##   interview_age + demo_race_hispanic
##
## Parametric coefficients:
##               Estimate Std. Error t value Pr(>|t|)
## (Intercept)      2.759444    1.793520   1.539 0.12402
## pds_p_ss_categoryEarly  0.685912    0.246939   2.778 0.00551 **
## pds_p_ss_categoryLate   0.397484    1.460818   0.272 0.78557
## pds_p_ss_categoryMid    1.178202    0.495319   2.379 0.01744 *

```

```

## race.ethnicity.5levelBlack 1.455896 0.743026 1.959 0.05016 .
## race.ethnicity.5levelMixed 2.137193 0.744125 2.872 0.00411 **
## race.ethnicity.5levelOther 1.989141 0.852405 2.334 0.01969 *
## race.ethnicity.5levelWhite 1.578115 0.696638 2.265 0.02357 *
## interview_age 0.002922 0.013943 0.210 0.83403
## demo_race_hispanic1 0.226067 0.301238 0.750 0.45304
## ---
## Signif. codes: 0 '***' 0.001 '**' 0.01 '*' 0.05 '.' 0.1 ' ' 1
##
##
## R-sq.(adj) = 0.00484
## lmer.REML = 17772 Scale est. = 16.208 n = 2857

##
## stdcoef stdse
## X(Intercept) 0.00000000 0.00000000
## Xpds_p_ss_categoryEarly 0.053997924 0.01944007
## Xpds_p_ss_categoryLate 0.005056331 0.01858284
## Xpds_p_ss_categoryMid 0.046489820 0.01954444
## Xrace.ethnicity.5levelBlack 0.093732042 0.04783676
## Xrace.ethnicity.5levelMixed 0.127019025 0.04422529
## Xrace.ethnicity.5levelOther 0.077691440 0.03329308
## Xrace.ethnicity.5levelWhite 0.136033680 0.06005028
## Xinterview_age 0.003981226 0.01899876
## Xdemo_race_hispanic1 0.016337381 0.02176982

```

## 1.6 Model: CBCL Anxious-Depressed ~ Pubertal category

### Female participants

```

##
## Family: gaussian
## Link function: identity
##
## Formula:
## cbcl_scr_syn_anxdep_r ~ pds_p_ss_category + race.ethnicity.5level +
##   interview_age + demo_race_hispanic
##
## Parametric coefficients:
## Estimate Std. Error t value Pr(>|t|)
## (Intercept) 1.915933 1.067993 1.794 0.07293 .
## pds_p_ss_categoryEarly 0.483184 0.163247 2.960 0.00311 **
## pds_p_ss_categoryLate 0.412744 0.403926 1.022 0.30696
## pds_p_ss_categoryMid 0.404799 0.154202 2.625 0.00871 **
## race.ethnicity.5levelBlack 0.084441 0.442742 0.191 0.84876
## race.ethnicity.5levelMixed 0.937872 0.441088 2.126 0.03357 *
## race.ethnicity.5levelOther 0.990706 0.503685 1.967 0.04930 *
## race.ethnicity.5levelWhite 0.830010 0.414449 2.003 0.04531 *
## interview_age -0.003648 0.008362 -0.436 0.66271
## demo_race_hispanic1 0.006521 0.176760 0.037 0.97058
## ---
## Signif. codes: 0 '***' 0.001 '**' 0.01 '*' 0.05 '.' 0.1 ' ' 1
##
##

```



```
## R-sq.(adj) = 0.00866
## lmer.REML = 13371 Scale est. = 4.9568 n = 2640
```

```
##
##          stdcoef      stdse
## X(Intercept)      0.000000000 0.00000000
## Xpds_p_ss_categoryEarly 0.0666821146 0.02252895
## Xpds_p_ss_categoryLate 0.0208294600 0.02038447
## Xpds_p_ss_categoryMid 0.0647849179 0.02467878
## Xrace.ethnicity.5levelBlack 0.0098365511 0.05157488
## Xrace.ethnicity.5levelMixed 0.1016743896 0.04781824
## Xrace.ethnicity.5levelOther 0.0682706259 0.03470949
## Xrace.ethnicity.5levelWhite 0.1282513981 0.06403985
## Xinterview_age -0.0088550958 0.02029912
## Xdemo_race_hispanic1 0.0008370453 0.02269039
```

### Male participants

```
##
## Family: gaussian
## Link function: identity
##
## Formula:
## cbcl_scr_syn_anxdep_r ~ pds_p_ss_category + race.ethnicity.5level +
##   interview_age + demo_race_hispanic
##
## Parametric coefficients:
##          Estimate Std. Error t value Pr(>|t|)
## (Intercept)      1.592050   1.001654   1.589 0.11208
## pds_p_ss_categoryEarly 0.436407   0.137843   3.166 0.00156 **
## pds_p_ss_categoryLate 0.345885   0.817733   0.423 0.67234
## pds_p_ss_categoryMid 0.435224   0.275427   1.580 0.11418
## race.ethnicity.5levelBlack 0.660100   0.413879   1.595 0.11084
## race.ethnicity.5levelMixed 1.171886   0.414745   2.826 0.00475 **
## race.ethnicity.5levelOther 1.135306   0.474168   2.394 0.01672 *
## race.ethnicity.5levelWhite 1.069142   0.388383   2.753 0.00595 **
## interview_age -0.002196   0.007787  -0.282 0.77798
## demo_race_hispanic1 0.087381   0.166734   0.524 0.60027
## ---
## Signif. codes:  0 '***' 0.001 '**' 0.01 '*' 0.05 '.' 0.1 ' ' 1
##
## R-sq.(adj) = 0.00511
## lmer.REML = 14457 Scale est. = 6.7476 n = 2857
```

```
##
##          stdcoef      stdse
## X(Intercept)      0.000000000 0.00000000
## Xpds_p_ss_categoryEarly 0.061767760 0.01950982
## Xpds_p_ss_categoryLate 0.007910588 0.01870203
## Xpds_p_ss_categoryMid 0.030875363 0.01953916
## Xrace.ethnicity.5levelBlack 0.076406127 0.04790630
## Xrace.ethnicity.5levelMixed 0.125219319 0.04431665
## Xrace.ethnicity.5levelOther 0.079722637 0.03329672
## Xrace.ethnicity.5levelWhite 0.165692943 0.06019062
```

```
## Xinterview_age          -0.005378974 0.01907577
## Xdemo_race_hispanic1    0.011353282 0.02166361
```

## 1.7 Model: CBCL Withdrawn-Depressed ~ Pubertal category

### Female participants

```
##
## Family: gaussian
## Link function: identity
##
## Formula:
## cbcl_scr_syn_withdep_r ~ pds_p_ss_category + race.ethnicity.5level +
##   interview_age + demo_race_hispanic
##
## Parametric coefficients:
##               Estimate Std. Error t value Pr(>|t|)
## (Intercept)    0.983908   0.554434   1.775  0.07608 .
## pds_p_ss_categoryEarly 0.254666   0.084977   2.997  0.00275 **
## pds_p_ss_categoryLate  0.905884   0.210356   4.306 1.72e-05 ***
## pds_p_ss_categoryMid   0.374417   0.079913   4.685 2.94e-06 ***
## race.ethnicity.5levelBlack 0.180349   0.227835   0.792  0.42868
## race.ethnicity.5levelMixed 0.414586   0.227277   1.824  0.06824 .
## race.ethnicity.5levelOther 0.568592   0.259949   2.187  0.02881 *
## race.ethnicity.5levelWhite 0.236442   0.213381   1.108  0.26793
## interview_age      -0.005017   0.004349  -1.154  0.24877
## demo_race_hispanic1  0.140478   0.090445   1.553  0.12050
## ---
## Signif. codes:  0 '***' 0.001 '**' 0.01 '*' 0.05 '.' 0.1 ' ' 1
##
##
## R-sq.(adj) =  0.0172
## lmer.REML =  9927  Scale est. = 1.6132    n = 2640

##               stdcoef      stdse
## X(Intercept)    0.00000000 0.00000000
## Xpds_p_ss_categoryEarly 0.06785245 0.02264112
## Xpds_p_ss_categoryLate  0.08826088 0.02049517
## Xpds_p_ss_categoryMid   0.11568793 0.02469164
## Xrace.ethnicity.5levelBlack 0.04056024 0.05123969
## Xrace.ethnicity.5levelMixed 0.08677235 0.04756868
## Xrace.ethnicity.5levelOther 0.07564646 0.03458409
## Xrace.ethnicity.5levelWhite 0.07053444 0.06365511
## Xinterview_age      -0.02351395 0.02038300
## Xdemo_race_hispanic1  0.03481499 0.02241516
```

### Male participants

```
##
## Family: gaussian
## Link function: identity
##
```

```

## Formula:
## cbcl_scr_syn_withdep_r ~ pds_p_ss_category + race.ethnicity.5level +
##   interview_age + demo_race_hispanic
##
## Parametric coefficients:
##               Estimate Std. Error t value Pr(>|t|)
## (Intercept)      0.5480997  0.5635243   0.973  0.33082
## pds_p_ss_categoryEarly  0.1319028  0.0780810   1.689  0.09127 .
## pds_p_ss_categoryLate   0.0210301  0.4639902   0.045  0.96385
## pds_p_ss_categoryMid    0.3981541  0.1562028   2.549  0.01086 *
## race.ethnicity.5levelBlack 0.5803954  0.2319996   2.502  0.01242 *
## race.ethnicity.5levelMixed 0.6177300  0.2336883   2.643  0.00825 **
## race.ethnicity.5levelOther 0.4619416  0.2675335   1.727  0.08434 .
## race.ethnicity.5levelWhite 0.3885289  0.2177832   1.784  0.07453 .
## interview_age         0.0003246  0.0043919   0.074  0.94110
## demo_race_hispanic1   0.0223286  0.0893140   0.250  0.80260
## ---
## Signif. codes:  0 '***' 0.001 '**' 0.01 '*' 0.05 '.' 0.1 ' ' 1
##
##
## R-sq.(adj) =  0.00561
## lmer.REML = 11224  Scale est. = 2.0875    n = 2857

##               stdcoef      stdse
## X(Intercept)      0.000000000  0.00000000
## Xpds_p_ss_categoryEarly  0.0329520473  0.01950624
## Xpds_p_ss_categoryLate   0.0008489385  0.01873028
## Xpds_p_ss_categoryMid    0.0498549997  0.01955899
## Xrace.ethnicity.5levelBlack 0.1185771728  0.04739848
## Xrace.ethnicity.5levelMixed 0.1165046408  0.04407390
## Xrace.ethnicity.5levelOther 0.0572551237  0.03315931
## Xrace.ethnicity.5levelWhite 0.1062797642  0.05957329
## Xinterview_age         0.0014034236  0.01899089
## Xdemo_race_hispanic1   0.0051206611  0.02048253

```

## 1.8 Model: CBCL Depressed DSM-5 ~ Pubertal category

### Female participants

```

##
## Family: gaussian
## Link function: identity
##
## Formula:
## cbcl_scr_dsm5_depress_r ~ pds_p_ss_category + race.ethnicity.5level +
##   interview_age + demo_race_hispanic
##
## Parametric coefficients:
##               Estimate Std. Error t value Pr(>|t|)
## (Intercept)      0.861575  0.644696   1.336  0.18153
## pds_p_ss_categoryEarly  0.256133  0.098889   2.590  0.00965 **
## pds_p_ss_categoryLate   0.731980  0.244492   2.994  0.00278 **
## pds_p_ss_categoryMid    0.380329  0.093369   4.073  4.77e-05 ***

```

```

## race.ethnicity.5levelBlack 0.216245 0.266521 0.811 0.41723
## race.ethnicity.5levelMixed 0.687983 0.266189 2.585 0.00980 **
## race.ethnicity.5levelOther 0.840944 0.304487 2.762 0.00579 **
## race.ethnicity.5levelWhite 0.535046 0.249565 2.144 0.03213 *
## interview_age -0.004198 0.005054 -0.831 0.40625
## demo_race_hispanic1 0.079854 0.105192 0.759 0.44785
## ---
## Signif. codes: 0 '***' 0.001 '**' 0.01 '*' 0.05 '.' 0.1 ' ' 1
##
##
## R-sq.(adj) = 0.0122
## lmer.REML = 10734 Scale est. = 1.7498 n = 2640

```

```

##          stdcoef      stdse
## X(Intercept)          0.0000000 0.0000000
## Xpds_p_ss_categoryEarly 0.05824499 0.02248746
## Xpds_p_ss_categoryLate 0.06086848 0.02033099
## Xpds_p_ss_categoryMid 0.10029741 0.02462256
## Xrace.ethnicity.5levelBlack 0.04150767 0.05115809
## Xrace.ethnicity.5levelMixed 0.12289703 0.04755027
## Xrace.ethnicity.5levelOther 0.09548869 0.03457437
## Xrace.ethnicity.5levelWhite 0.13622777 0.06354166
## Xinterview_age -0.01679345 0.02021751
## Xdemo_race_hispanic1 0.01689074 0.02225046

```

## Male participants

```

##
## Family: gaussian
## Link function: identity
##
## Formula:
## cbcl_scr_dsm5_depress_r ~ pds_p_ss_category + race.ethnicity.5level +
##   interview_age + demo_race_hispanic
##
## Parametric coefficients:
##          Estimate Std. Error t value Pr(>|t|)
## (Intercept)      0.653071  0.687655  0.950  0.3423
## pds_p_ss_categoryEarly 0.220861  0.094888  2.328  0.0200 *
## pds_p_ss_categoryLate -0.072883  0.562731 -0.130  0.8970
## pds_p_ss_categoryMid 0.474658  0.189822  2.501  0.0125 *
## race.ethnicity.5levelBlack 0.499664  0.283890  1.760  0.0785 .
## race.ethnicity.5levelMixed 0.674279  0.284982  2.366  0.0180 *
## race.ethnicity.5levelOther 0.586039  0.326133  1.797  0.0725 .
## race.ethnicity.5levelWhite 0.513277  0.266405  1.927  0.0541 .
## interview_age      0.001055  0.005352  0.197  0.8438
## demo_race_hispanic1 -0.058102  0.112922 -0.515  0.6069
## ---
## Signif. codes: 0 '***' 0.001 '**' 0.01 '*' 0.05 '.' 0.1 ' ' 1
##
##
## R-sq.(adj) = 0.00262
## lmer.REML = 12328 Scale est. = 2.9441 n = 2857

```

```

##               stdcoef      stdse
## X(Intercept)      0.00000000 0.00000000
## Xpds_p_ss_categoryEarly  0.045470029 0.01953533
## Xpds_p_ss_categoryLate -0.002424607 0.01872039
## Xpds_p_ss_categoryMid   0.048979790 0.01958767
## Xrace.ethnicity.5levelBlack 0.084126691 0.04779767
## Xrace.ethnicity.5levelMixed 0.104800481 0.04429357
## Xrace.ethnicity.5levelOther 0.059859395 0.03331198
## Xrace.ethnicity.5levelWhite 0.115706510 0.06005496
## Xinterview_age      0.003758767 0.01907250
## Xdemo_race_hispanic1 -0.010980840 0.02134141

```

## 1.9 Model: CBCL internalizing factor ~ Testosterone

### Female participants

```

##
## Family: gaussian
## Link function: identity
##
## Formula:
## cbcl_scr_syn_internal_r ~ hormone_scr_ert_mean + race.ethnicity.5level +
##   interview_age + demo_race_hispanic
##
## Parametric coefficients:
##               Estimate Std. Error t value Pr(>|t|)
## (Intercept)      1.777154   1.897510   0.937  0.34907
## hormone_scr_ert_mean  0.005443   0.007058   0.771  0.44066
## race.ethnicity.5levelBlack 0.356154   0.793854   0.449  0.65373
## race.ethnicity.5levelMixed 1.827132   0.793913   2.301  0.02145 *
## race.ethnicity.5levelOther 2.642245   0.908951   2.907  0.00368 **
## race.ethnicity.5levelWhite 1.441831   0.745211   1.935  0.05313 .
## interview_age      0.013505   0.014891   0.907  0.36452
## demo_race_hispanic1  0.107062   0.326216   0.328  0.74279
## ---
## Signif. codes:  0 '***' 0.001 '**' 0.01 '*' 0.05 '.' 0.1 ' ' 1
##
##
## R-sq.(adj) =  0.00669
## lmer.REML = 15258  Scale est. = 13.026  n = 2453
##
##               stdcoef      stdse
## X(Intercept)      0.00000000 0.00000000
## Xhormone_scr_ert_mean  0.016033862 0.02079048
## Xrace.ethnicity.5levelBlack 0.022625361 0.05043105
## Xrace.ethnicity.5levelMixed 0.111704497 0.04853712
## Xrace.ethnicity.5levelOther 0.103316708 0.03554169
## Xrace.ethnicity.5levelWhite 0.124259018 0.06422335
## Xinterview_age      0.018455837 0.02034908
## Xdemo_race_hispanic1  0.007687489 0.02342355

```

## Male participants

```
##
## Family: gaussian
## Link function: identity
##
## Formula:
## cbcl_scr_syn_internal_r ~ hormone_scr_ert_mean + race.ethnicity.5level +
##   interview_age + demo_race_hispanic
##
## Parametric coefficients:
##               Estimate Std. Error t value Pr(>|t|)
## (Intercept)    2.157007   1.864225   1.157  0.24736
## hormone_scr_ert_mean 0.002743   0.007291   0.376  0.70680
## race.ethnicity.5levelBlack 1.728552   0.771557   2.240  0.02515 *
## race.ethnicity.5levelMixed 2.136824   0.774109   2.760  0.00581 **
## race.ethnicity.5levelOther 1.852717   0.891847   2.077  0.03786 *
## race.ethnicity.5levelWhite 1.578663   0.724376   2.179  0.02939 *
## interview_age    0.009071   0.014673   0.618  0.53647
## demo_race_hispanic1 0.379492   0.312391   1.215  0.22455
## ---
## Signif. codes:  0 '***' 0.001 '**' 0.01 '*' 0.05 '.' 0.1 ' ' 1
##
##
## R-sq.(adj) =  0.000908
## lmer.REML = 16587  Scale est. = 16.746    n = 2651

##               stdcoef      stdse
## X(Intercept)    0.00000000 0.00000000
## Xhormone_scr_ert_mean 0.007636881 0.02030028
## Xrace.ethnicity.5levelBlack 0.109149150 0.04871981
## Xrace.ethnicity.5levelMixed 0.126176324 0.04570999
## Xrace.ethnicity.5levelOther 0.070878391 0.03411890
## Xrace.ethnicity.5levelWhite 0.134267496 0.06160918
## Xinterview_age    0.012240349 0.01979880
## Xdemo_race_hispanic1 0.027114435 0.02232008
```

## 1.10 Model: CBCL Anxious-Depressed ~ Testosterone

### Female participants

```
##
## Family: gaussian
## Link function: identity
##
## Formula:
## cbcl_scr_syn_anxdep_r ~ hormone_scr_ert_mean + race.ethnicity.5level +
##   interview_age + demo_race_hispanic
##
## Parametric coefficients:
##               Estimate Std. Error t value Pr(>|t|)
## (Intercept)    1.183409   1.072832   1.103  0.2701
## hormone_scr_ert_mean 0.004823   0.003988   1.209  0.2266
```

```

## race.ethnicity.5levelBlack 0.034266 0.445232 0.077 0.9387
## race.ethnicity.5levelMixed 0.857746 0.445476 1.925 0.0543 .
## race.ethnicity.5levelOther 1.034142 0.510581 2.025 0.0429 *
## race.ethnicity.5levelWhite 0.850951 0.418116 2.035 0.0419 *
## interview_age 0.003577 0.008433 0.424 0.6714
## demo_race_hispanic1 -0.027670 0.182744 -0.151 0.8797
## ---
## Signif. codes: 0 '***' 0.001 '**' 0.01 '*' 0.05 '.' 0.1 ' ' 1
##
##
## R-sq.(adj) = 0.00676
## lmer.REML = 12461 Scale est. = 4.9188 n = 2453

##
##
## stdcoef stdse
## X(Intercept) 0.000000000 0.000000000
## Xhormone_scr_ert_mean 0.025295012 0.02091515
## Xrace.ethnicity.5levelBlack 0.003875357 0.05035431
## Xrace.ethnicity.5levelMixed 0.093358200 0.04848619
## Xrace.ethnicity.5levelOther 0.071989735 0.03554307
## Xrace.ethnicity.5levelWhite 0.130560331 0.06415092
## Xinterview_age 0.008703330 0.02051598
## Xdemo_race_hispanic1 -0.003537101 0.02336061

```

## Male participants

```

##
## Family: gaussian
## Link function: identity
##
## Formula:
## cbcl_scr_syn_anxdep_r ~ hormone_scr_ert_mean + race.ethnicity.5level +
##   interview_age + demo_race_hispanic
##
## Parametric coefficients:
##
## Estimate Std. Error t value Pr(>|t|)
## (Intercept) 1.4058686 1.0408896 1.351 0.17693
## hormone_scr_ert_mean -0.0003214 0.0040664 -0.079 0.93701
## race.ethnicity.5levelBlack 0.8143602 0.4297637 1.895 0.05821 .
## race.ethnicity.5levelMixed 1.1554458 0.4315880 2.677 0.00747 **
## race.ethnicity.5levelOther 1.0602400 0.4961530 2.137 0.03270 *
## race.ethnicity.5levelWhite 1.0355457 0.4039386 2.564 0.01041 *
## interview_age 0.0007097 0.0081887 0.087 0.93094
## demo_race_hispanic1 0.1603853 0.1727782 0.928 0.35335
## ---
## Signif. codes: 0 '***' 0.001 '**' 0.01 '*' 0.05 '.' 0.1 ' ' 1
##
##
## R-sq.(adj) = 0.00142
## lmer.REML = 13510 Scale est. = 7.1618 n = 2651

##
##
## stdcoef stdse
## X(Intercept) 0.000000000 0.000000000
## Xhormone_scr_ert_mean 0.025295012 0.02091515

```

```

## Xrace.ethnicity.5levelBlack 0.003875357 0.05035431
## Xrace.ethnicity.5levelMixed 0.093358200 0.04848619
## Xrace.ethnicity.5levelOther 0.071989735 0.03554307
## Xrace.ethnicity.5levelWhite 0.130560331 0.06415092
## Xinterview_age 0.008703330 0.02051598
## Xdemo_race_hispanic1 -0.003537101 0.02336061

```

## 1.11 Model: CBCL Withdrawn-Depressed ~ Testosterone

### Female participants

```

##
## Family: gaussian
## Link function: identity
##
## Formula:
## cbcl_scr_syn_withdep_r ~ hormone_scr_ert_mean + race.ethnicity.5level +
##   interview_age + demo_race_hispanic
##
## Parametric coefficients:
##               Estimate Std. Error t value Pr(>|t|)
## (Intercept)    0.133412   0.551030   0.242   0.8087
## hormone_scr_ert_mean 0.001354   0.002047   0.661   0.5084
## race.ethnicity.5levelBlack 0.276842   0.226348   1.223   0.2214
## race.ethnicity.5levelMixed 0.433104   0.226779   1.910   0.0563 .
## race.ethnicity.5levelOther 0.595871   0.260391   2.288   0.0222 *
## race.ethnicity.5levelWhite 0.254142   0.212744   1.195   0.2324
## interview_age    0.003477   0.004341   0.801   0.4232
## demo_race_hispanic1 0.143812   0.092509   1.555   0.1202
## ---
## Signif. codes:  0 '***' 0.001 '**' 0.01 '*' 0.05 '.' 0.1 ' ' 1
##
##
## R-sq.(adj) = 0.00431
## lmer.REML = 9205 Scale est. = 1.635 n = 2453

##               stdcoef      stdse
## X(Intercept)    0.00000000 0.00000000
## Xhormone_scr_ert_mean 0.01394301 0.02108262
## Xrace.ethnicity.5levelBlack 0.06147413 0.05026165
## Xrace.ethnicity.5levelMixed 0.09255437 0.04846269
## Xrace.ethnicity.5levelOther 0.08144294 0.03558991
## Xrace.ethnicity.5levelWhite 0.07655856 0.06408774
## Xinterview_age    0.01661007 0.02073628
## Xdemo_race_hispanic1 0.03609479 0.02321844

```

### Male participants

```

##
## Family: gaussian
## Link function: identity
##

```



```

## Formula:
## cbcl_scr_syn_withdep_r ~ hormone_scr_ert_mean + race.ethnicity.5level +
##   interview_age + demo_race_hispanic
##
## Parametric coefficients:
##               Estimate Std. Error t value Pr(>|t|)
## (Intercept)      0.321946   0.577770   0.557  0.57742
## hormone_scr_ert_mean 0.001620   0.002244   0.722  0.47037
## race.ethnicity.5levelBlack 0.678586   0.237448   2.858  0.00430 **
## race.ethnicity.5levelMixed 0.653492   0.239863   2.724  0.00648 **
## race.ethnicity.5levelOther 0.449709   0.276074   1.629  0.10344
## race.ethnicity.5levelWhite 0.415977   0.223382   1.862  0.06269 .
## interview_age      0.001935   0.004558   0.425  0.67120
## demo_race_hispanic1 0.061942   0.091277   0.679  0.49744
## ---
## Signif. codes:  0 '***' 0.001 '**' 0.01 '*' 0.05 '.' 0.1 ' ' 1
##
##
## R-sq.(adj) =  0.00368
## lmer.REML = 10441 Scale est. = 2.2517   n = 2651

##               stdcoef      stdse
## X(Intercept)      0.000000000 0.000000000
## Xhormone_scr_ert_mean 0.014498371 0.02008132
## Xrace.ethnicity.5levelBlack 0.137702360 0.04818414
## Xrace.ethnicity.5levelMixed 0.124007428 0.04551675
## Xrace.ethnicity.5levelOther 0.055288500 0.03394135
## Xrace.ethnicity.5levelWhite 0.113697083 0.06105606
## Xinterview_age      0.008391835 0.01976630
## Xdemo_race_hispanic1 0.014222578 0.02095832

```

## 1.12 Model: CBCL Depressed DSM-5 ~ Testosterone

### Female participants

```

##
## Family: gaussian
## Link function: identity
##
## Formula:
## cbcl_scr_dsm5_depress_r ~ hormone_scr_ert_mean + race.ethnicity.5level +
##   interview_age + demo_race_hispanic
##
## Parametric coefficients:
##               Estimate Std. Error t value Pr(>|t|)
## (Intercept)      0.062803   0.644415   0.097  0.92237
## hormone_scr_ert_mean 0.001558   0.002399   0.650  0.51607
## race.ethnicity.5levelBlack 0.289625   0.265904   1.089  0.27617
## race.ethnicity.5levelMixed 0.689545   0.267077   2.582  0.00989 **
## race.ethnicity.5levelOther 0.886527   0.306968   2.888  0.00391 **
## race.ethnicity.5levelWhite 0.552485   0.249976   2.210  0.02719 *
## interview_age      0.003890   0.005076   0.766  0.44361
## demo_race_hispanic1 0.066325   0.107696   0.616  0.53805

```

```
## ---
## Signif. codes:  0 '***' 0.001 '**' 0.01 '*' 0.05 '.' 0.1 ' ' 1
##
##
## R-sq.(adj) =  0.00535
## lmer.REML =  9990  Scale est. = 1.7521    n = 2453
```

```
##
##
##          stdcoef      stdse
## X(Intercept)      0.00000000 0.00000000
## Xhormone_scr_ert_mean      0.01354995 0.02086202
## Xrace.ethnicity.5levelBlack 0.05432347 0.04987408
## Xrace.ethnicity.5levelMixed 0.12446769 0.04820919
## Xrace.ethnicity.5levelOther 0.10234885 0.03543918
## Xrace.ethnicity.5levelWhite 0.14058123 0.06360714
## Xinterview_age      0.01569345 0.02048120
## Xdemo_race_hispanic1      0.01406111 0.02283175
```

### Male participants

```
##
## Family: gaussian
## Link function: identity
##
## Formula:
## cbcl_scr_dsm5_depress_r ~ hormone_scr_ert_mean + race.ethnicity.5level +
##   interview_age + demo_race_hispanic
##
## Parametric coefficients:
##
##          Estimate Std. Error t value Pr(>|t|)
## (Intercept)      0.4369093  0.7141009   0.612  0.5407
## hormone_scr_ert_mean      0.0007399  0.0027866   0.266  0.7906
## race.ethnicity.5levelBlack 0.5968958  0.2944573   2.027  0.0428 *
## race.ethnicity.5levelMixed 0.7065006  0.2963343   2.384  0.0172 *
## race.ethnicity.5levelOther 0.5322299  0.3411650   1.560  0.1189
## race.ethnicity.5levelWhite 0.5149283  0.2767705   1.860  0.0629 .
## interview_age      0.0033258  0.0056274   0.591  0.5546
## demo_race_hispanic1     -0.0169056  0.1167966  -0.145  0.8849
## ---
## Signif. codes:  0 '***' 0.001 '**' 0.01 '*' 0.05 '.' 0.1 ' ' 1
##
##
## R-sq.(adj) = -0.000239
## lmer.REML = 11531  Scale est. = 2.9567    n = 2651
```

```
##
##
##          stdcoef      stdse
## X(Intercept)      0.000000000 0.000000000
## Xhormone_scr_ert_mean      0.005382587 0.02027209
## Xrace.ethnicity.5levelBlack 0.098482933 0.04858305
## Xrace.ethnicity.5levelMixed 0.109004982 0.04572099
## Xrace.ethnicity.5levelOther 0.053202093 0.03410311
## Xrace.ethnicity.5levelWhite 0.114433424 0.06150719
## Xinterview_age      0.011725524 0.01984050
## Xdemo_race_hispanic1     -0.003156124 0.02180481
```

## 1.13 Model: CBCL internalizing factor ~ Testosterone + PDS

### Female participants

```
##
## Family: gaussian
## Link function: identity
##
## Formula:
## cbcl_scr_syn_internal_r ~ hormone_scr_ert_mean + PDS_score +
##   race.ethnicity.5level + interview_age + demo_race_hispanic
##
## Parametric coefficients:
##               Estimate Std. Error t value Pr(>|t|)
## (Intercept)    2.5126736  1.9039529   1.320 0.187054
## hormone_scr_ert_mean -0.0007324  0.0072485  -0.101 0.919525
## PDS_score       0.6083923  0.1697666   3.584 0.000345 ***
## race.ethnicity.5levelBlack -0.0375505  0.7994683  -0.047 0.962542
## race.ethnicity.5levelMixed  1.6444446  0.7935891   2.072 0.038355 *
## race.ethnicity.5levelOther  2.4066014  0.9091006   2.647 0.008167 **
## race.ethnicity.5levelWhite  1.3496082  0.7437925   1.814 0.069724 .
## interview_age    0.0018428  0.0152063   0.121 0.903555
## demo_race_hispanic1  0.0937585  0.3253881   0.288 0.773261
## ---
## Signif. codes:  0 '***' 0.001 '**' 0.01 '*' 0.05 '.' 0.1 ' ' 1
##
##
## R-sq.(adj) =  0.011
## lmer.REML = 15247  Scale est. = 12.976    n = 2453

##               stdcoef      stdse
## X(Intercept)    0.000000000 0.00000000
## Xhormone_scr_ert_mean -0.002157532 0.02135282
## XPDS_score       0.079996978 0.02232246
## Xrace.ethnicity.5levelBlack -0.002385464 0.05078772
## Xrace.ethnicity.5levelMixed  0.100535650 0.04851729
## Xrace.ethnicity.5levelOther  0.094102604 0.03554753
## Xrace.ethnicity.5levelWhite  0.116311148 0.06410109
## Xinterview_age    0.002518249 0.02078038
## Xdemo_race_hispanic1  0.006732210 0.02336409
```

### Male participants

```
##
## Family: gaussian
## Link function: identity
##
## Formula:
## cbcl_scr_syn_internal_r ~ hormone_scr_ert_mean + PDS_score +
##   race.ethnicity.5level + interview_age + demo_race_hispanic
##
## Parametric coefficients:
##               Estimate Std. Error t value Pr(>|t|)
```

```

## (Intercept)                2.3385395  1.8581774   1.259  0.20832
## hormone_scr_ert_mean       -0.0008243  0.0073102  -0.113  0.91023
## PDS_score                   0.9481165  0.2116215   4.480  7.77e-06 ***
## race.ethnicity.5levelBlack  1.3600344  0.7733580   1.759  0.07876 .
## race.ethnicity.5levelMixed  2.0456100  0.7716998   2.651  0.00808 **
## race.ethnicity.5levelOther  1.7250461  0.8892679   1.940  0.05250 .
## race.ethnicity.5levelWhite  1.5412692  0.7219657   2.135  0.03287 *
## interview_age               -0.0013724  0.0148083  -0.093  0.92617
## demo_race_hispanic1         0.3025942  0.3120542   0.970  0.33229
## ---
## Signif. codes:  0 '***' 0.001 '**' 0.01 '*' 0.05 '.' 0.1 ' ' 1
##
##
## R-sq.(adj) =  0.00746
## lmer.REML = 16568  Scale est. = 16.482   n = 2651

##                               stdcoef      stdse
## X(Intercept)                   0.000000000  0.000000000
## Xhormone_scr_ert_mean           -0.002294870  0.02035276
## XPDS_score                      0.092394046  0.02062254
## Xrace.ethnicity.5levelBlack     0.085879143  0.04883356
## Xrace.ethnicity.5levelMixed     0.120790285  0.04556775
## Xrace.ethnicity.5levelOther     0.065994169  0.03402025
## Xrace.ethnicity.5levelWhite     0.131087101  0.06140419
## Xinterview_age                  -0.001851802  0.01998125
## Xdemo_race_hispanic1            0.021620120  0.02229603

```

## 1.14 Model: CBCL internalizing factor ~ Testosterone + Pubertal category

### Female participants

```

##
## Family: gaussian
## Link function: identity
##
## Formula:
## cbcl_scr_syn_internal_r ~ hormone_scr_ert_mean + pds_p_ss_category +
##   race.ethnicity.5level + interview_age + demo_race_hispanic
##
## Parametric coefficients:
##                               Estimate Std. Error t value Pr(>|t|)
## (Intercept)                   3.1911880  1.9388316   1.646  0.09991 .
## hormone_scr_ert_mean           0.0004012  0.0071781   0.056  0.95543
## pds_p_ss_categoryEarly         0.9264288  0.2982685   3.106  0.00192 **
## pds_p_ss_categoryLate         1.0992131  0.7741539   1.420  0.15577
## pds_p_ss_categoryMid          1.2225403  0.2890843   4.229  2.43e-05 ***
## race.ethnicity.5levelBlack     0.0056281  0.7994747   0.007  0.99438
## race.ethnicity.5levelMixed     1.6934486  0.7931990   2.135  0.03286 *
## race.ethnicity.5levelOther     2.4769969  0.9078018   2.729  0.00641 **
## race.ethnicity.5levelWhite     1.4036386  0.7433801   1.888  0.05912 .
## interview_age                  -0.0024913  0.0154099  -0.162  0.87158
## demo_race_hispanic1            0.0477434  0.3264159   0.146  0.88372
## ---

```

```
## Signif. codes:  0 '***' 0.001 '**' 0.01 '*' 0.05 '.' 0.1 ' ' 1
##
##
## R-sq.(adj) =  0.0123
## lmer.REML = 15239  Scale est. = 12.821    n = 2453
```

```
##
##
##          stdcoef      stdse
## X(Intercept)          0.000000000 0.000000000
## Xhormone_scr_ert_mean  0.0011818672 0.02114545
## Xpds_p_ss_categoryEarly 0.0720675070 0.02320251
## Xpds_p_ss_categoryLate  0.0296449313 0.02087833
## Xpds_p_ss_categoryMid   0.1091599094 0.02581217
## Xrace.ethnicity.5levelBlack 0.0003575324 0.05078812
## Xrace.ethnicity.5levelMixed 0.1035315893 0.04849344
## Xrace.ethnicity.5levelOther 0.0968551970 0.03549674
## Xrace.ethnicity.5levelWhite 0.1209675645 0.06406555
## Xinterview_age        -0.0034045374 0.02105865
## Xdemo_race_hispanic1   0.0034281562 0.02343789
```

### Male participants

```
##
## Family: gaussian
## Link function: identity
##
## Formula:
## cbcl_scr_syn_internal_r ~ hormone_scr_ert_mean + pds_p_ss_category +
##   race.ethnicity.5level + interview_age + demo_race_hispanic
##
## Parametric coefficients:
##
##          Estimate Std. Error t value Pr(>|t|)
## (Intercept)      2.966291   1.874389   1.583  0.11365
## hormone_scr_ert_mean  0.000713   0.007302   0.098  0.92222
## pds_p_ss_categoryEarly  0.814256   0.260188   3.129  0.00177 **
## pds_p_ss_categoryLate   0.840681   1.596758   0.526  0.59859
## pds_p_ss_categoryMid    1.274985   0.524943   2.429  0.01521 *
## race.ethnicity.5levelBlack 1.431202   0.775159   1.846  0.06496 .
## race.ethnicity.5levelMixed 2.091142   0.772971   2.705  0.00687 **
## race.ethnicity.5levelOther 1.786129   0.891038   2.005  0.04511 *
## race.ethnicity.5levelWhite 1.585169   0.723071   2.192  0.02845 *
## interview_age         0.001113   0.014814   0.075  0.94013
## demo_race_hispanic1   0.273079   0.313390   0.871  0.38363
## ---
## Signif. codes:  0 '***' 0.001 '**' 0.01 '*' 0.05 '.' 0.1 ' ' 1
##
##
## R-sq.(adj) =  0.00487
## lmer.REML = 16571  Scale est. = 16.785    n = 2651
```

```
##
##          stdcoef      stdse
## X(Intercept)          0.000000000 0.000000000
## Xhormone_scr_ert_mean  0.001985229 0.02032979
## Xpds_p_ss_categoryEarly 0.063275702 0.02021920
```

```
## Xpds_p_ss_categoryLate      0.010146829 0.01927251
## Xpds_p_ss_categoryMid      0.049505338 0.02038258
## Xrace.ethnicity.5levelBlack 0.090373022 0.04894729
## Xrace.ethnicity.5levelMixed 0.123478858 0.04564283
## Xrace.ethnicity.5levelOther 0.068330972 0.03408798
## Xrace.ethnicity.5levelWhite 0.134820812 0.06149817
## Xinterview_age             0.001501517 0.01998875
## Xdemo_race_hispanic1      0.019511277 0.02239146
```

## 1.15 Model: CBCL Anxious-Depressed ~ Testosterone + PDS

### Female participants

```
##
## Family: gaussian
## Link function: identity
##
## Formula:
## cbcl_scr_syn_anxdep_r ~ hormone_scr_ert_mean + PDS_score + race.ethnicity.5level +
##   interview_age + demo_race_hispanic
##
## Parametric coefficients:
##              Estimate Std. Error t value Pr(>|t|)
## (Intercept)   1.3963972  1.0785158   1.295  0.1955
## hormone_scr_ert_mean 0.0030115  0.0041066   0.733  0.4634
## PDS_score      0.1760253  0.0959901   1.834  0.0668 .
## race.ethnicity.5levelBlack -0.0801965  0.4493329  -0.178  0.8584
## race.ethnicity.5levelMixed  0.8045575  0.4461652   1.803  0.0715 .
## race.ethnicity.5levelOther  0.9650993  0.5116810   1.886  0.0594 .
## race.ethnicity.5levelWhite  0.8238669  0.4181297   1.970  0.0489 *
## interview_age  0.0002133  0.0086250   0.025  0.9803
## demo_race_hispanic1 -0.0314620  0.1826377  -0.172  0.8632
## ---
## Signif. codes:  0 '***' 0.001 '**' 0.01 '*' 0.05 '.' 0.1 ' ' 1
##
##
## R-sq.(adj) =  0.0077
## lmer.REML = 12460  Scale est. = 4.9271  n = 2453

##              stdcoef      stdse
## X(Intercept)  0.0000000000 0.00000000
## Xhormone_scr_ert_mean 0.0157934393 0.02153673
## XPDS_score    0.0412057495 0.02247032
## Xrace.ethnicity.5levelBlack -0.0090699635 0.05081812
## Xrace.ethnicity.5levelMixed  0.0875690910 0.04856120
## Xrace.ethnicity.5levelOther  0.0671834638 0.03561965
## Xrace.ethnicity.5levelWhite  0.1264048082 0.06415309
## Xinterview_age  0.0005188738 0.02098374
## Xdemo_race_hispanic1 -0.0040218594 0.02334697
```

### Male participants

```
##
```

```

## Family: gaussian
## Link function: identity
##
## Formula:
## cbcl_scr_syn_anxdep_r ~ hormone_scr_ert_mean + PDS_score + race.ethnicity.5level +
##   interview_age + demo_race_hispanic
##
## Parametric coefficients:
##               Estimate Std. Error t value Pr(>|t|)
## (Intercept)      1.502920   1.038409   1.447  0.1479
## hormone_scr_ert_mean -0.002132   0.004081  -0.523  0.6013
## PDS_score         0.479811   0.118037   4.065 4.95e-05 ***
## race.ethnicity.5levelBlack 0.626666   0.431152   1.453  0.1462
## race.ethnicity.5levelMixed 1.107656   0.430574   2.573  0.0102 *
## race.ethnicity.5levelOther 0.996180   0.495062   2.012  0.0443 *
## race.ethnicity.5levelWhite 1.015140   0.402920   2.519  0.0118 *
## interview_age     -0.004613   0.008272  -0.558  0.5771
## demo_race_hispanic1  0.122108   0.172829   0.707  0.4799
## ---
## Signif. codes:  0 '***' 0.001 '**' 0.01 '*' 0.05 '.' 0.1 ' ' 1
##
##
## R-sq.(adj) =  0.0067
## lmer.REML = 13496  Scale est. = 7.0718    n = 2651

##               stdcoef      stdse
## X(Intercept)      0.00000000 0.00000000
## Xhormone_scr_ert_mean -0.01066931 0.02041700
## XPDS_score         0.08402881 0.02067175
## Xrace.ethnicity.5levelBlack 0.07111311 0.04892653
## Xrace.ethnicity.5levelMixed 0.11754121 0.04569126
## Xrace.ethnicity.5levelOther 0.06848869 0.03403618
## Xrace.ethnicity.5levelWhite 0.15516135 0.06158525
## Xinterview_age     -0.01118530 0.02005850
## Xdemo_race_hispanic1  0.01567902 0.02219165

```

## 1.16 Model: CBCL Anxious-Depressed ~ Testosterone + Pubertal category

### Female participants

```

##
## Family: gaussian
## Link function: identity
##
## Formula:
## cbcl_scr_syn_anxdep_r ~ hormone_scr_ert_mean + pds_p_ss_category +
##   race.ethnicity.5level + interview_age + demo_race_hispanic
##
## Parametric coefficients:
##               Estimate Std. Error t value Pr(>|t|)
## (Intercept)      1.508191   1.098965   1.372  0.17007
## hormone_scr_ert_mean 0.003622   0.004068   0.890  0.37332
## pds_p_ss_categoryEarly 0.453347   0.169177   2.680  0.00742 **

```

```

## pds_p_ss_categoryLate      0.098787  0.440211  0.224  0.82246
## pds_p_ss_categoryMid       0.398897  0.163385  2.441  0.01470 *
## race.ethnicity.5levelBlack -0.039410  0.449379 -0.088  0.93012
## race.ethnicity.5levelMixed  0.832990  0.445977  1.868  0.06191 .
## race.ethnicity.5levelOther  0.999761  0.510972  1.957  0.05051 .
## race.ethnicity.5levelWhite  0.849123  0.417941  2.032  0.04229 *
## interview_age              -0.001035  0.008746 -0.118  0.90579
## demo_race_hispanic1       -0.040163  0.183275 -0.219  0.82656
## ---
## Signif. codes:  0 '***' 0.001 '**' 0.01 '*' 0.05 '.' 0.1 ' ' 1
##
##
## R-sq.(adj) =  0.00886
## lmer.REML = 12456  Scale est. = 4.8884  n = 2453

```

```

##                                stdcoef      stdse
## X(Intercept)                   0.000000000  0.000000000
## Xhormone_scr_ert_mean           0.018994922  0.02133217
## Xpds_p_ss_categoryEarly         0.062784333  0.02342944
## Xpds_p_ss_categoryLate         0.004743106  0.02113600
## Xpds_p_ss_categoryMid          0.063409386  0.02597197
## Xrace.ethnicity.5levelBlack    -0.004457115  0.05082334
## Xrace.ethnicity.5levelMixed    0.090663707  0.04854067
## Xrace.ethnicity.5levelOther    0.069596400  0.03557028
## Xrace.ethnicity.5levelWhite    0.130279855  0.06412419
## Xinterview_age                 -0.002518605  0.02127777
## Xdemo_race_hispanic1          -0.005134106  0.02342844

```

## Male participants

```

##
## Family: gaussian
## Link function: identity
##
## Formula:
## cbcl_scr_syn_anxdep_r ~ hormone_scr_ert_mean + pds_p_ss_category +
##   race.ethnicity.5level + interview_age + demo_race_hispanic
##
## Parametric coefficients:
##                                Estimate Std. Error t value Pr(>|t|)
## (Intercept)                   1.831438   1.046851   1.749  0.08033 .
## hormone_scr_ert_mean          -0.001314   0.004074  -0.322  0.74715
## pds_p_ss_categoryEarly         0.482188   0.145339   3.318  0.00092 ***
## pds_p_ss_categoryLate         0.593810   0.895441   0.663  0.50729
## pds_p_ss_categoryMid          0.489201   0.291920   1.676  0.09389 .
## race.ethnicity.5levelBlack    0.670774   0.432012   1.553  0.12062
## race.ethnicity.5levelMixed    1.139091   0.431100   2.642  0.00828 **
## race.ethnicity.5levelOther    1.041831   0.495854   2.101  0.03573 *
## race.ethnicity.5levelWhite    1.042752   0.403392   2.585  0.00979 **
## interview_age                 -0.003598   0.008269  -0.435  0.66348
## demo_race_hispanic1           0.106813   0.173601   0.615  0.53842
## ---
## Signif. codes:  0 '***' 0.001 '**' 0.01 '*' 0.05 '.' 0.1 ' ' 1

```



```

##
##
## R-sq.(adj) = 0.00467
## lmer.REML = 13499 Scale est. = 7.1632 n = 2651

##                stdcoef      stdse
## X(Intercept)      0.00000000 0.00000000
## Xhormone_scr_ert_mean -0.006572939 0.02038550
## Xpds_p_ss_categoryEarly 0.067339351 0.02029710
## Xpds_p_ss_categoryLate 0.012880212 0.01942282
## Xpds_p_ss_categoryMid 0.034135803 0.02036979
## Xrace.ethnicity.5levelBlack 0.076118506 0.04902415
## Xrace.ethnicity.5levelMixed 0.120876947 0.04574704
## Xrace.ethnicity.5levelOther 0.071627242 0.03409059
## Xrace.ethnicity.5levelWhite 0.159381710 0.06165740
## Xinterview_age -0.008725106 0.02005045
## Xdemo_race_hispanic1 0.013715075 0.02229085

```

## 1.17 Model: CBCL Withdrawn-Depressed ~ Testosterone + PDS

### Female participants

```

##
## Family: gaussian
## Link function: identity
##
## Formula:
## cbcl_scr_syn_withdep_r ~ hormone_scr_ert_mean + PDS_score + race.ethnicity.5level +
##   interview_age + demo_race_hispanic
##
## Parametric coefficients:
##                Estimate Std. Error t value Pr(>|t|)
## (Intercept)      3.556e-01  5.525e-01  0.644 0.519837
## hormone_scr_ert_mean -5.752e-04  2.105e-03 -0.273 0.784659
## PDS_score          1.833e-01  4.913e-02  3.731 0.000195 ***
## race.ethnicity.5levelBlack 1.587e-01  2.279e-01  0.696 0.486274
## race.ethnicity.5levelMixed 3.788e-01  2.266e-01  1.672 0.094735 .
## race.ethnicity.5levelOther 5.243e-01  2.604e-01  2.013 0.044193 *
## race.ethnicity.5levelWhite 2.268e-01  2.122e-01  1.069 0.285173
## interview_age     -1.613e-05  4.427e-03 -0.004 0.997094
## demo_race_hispanic1 1.384e-01  9.207e-02  1.503 0.132878
## ---
## Signif. codes:  0 '***' 0.001 '**' 0.01 '*' 0.05 '.' 0.1 ' ' 1
##
##
## R-sq.(adj) = 0.00942
## lmer.REML = 9195.4 Scale est. = 1.6114 n = 2453

##                stdcoef      stdse
## X(Intercept)      0.000000e+00 0.00000000
## Xhormone_scr_ert_mean -5.922691e-03 0.02167236
## XPDS_score          8.424189e-02 0.02257935
## Xrace.ethnicity.5levelBlack 3.523631e-02 0.05060126

```

```

## Xrace.ethnicity.5levelMixed 8.093960e-02 0.04842092
## Xrace.ethnicity.5levelOther 7.165441e-02 0.03559062
## Xrace.ethnicity.5levelWhite 6.832264e-02 0.06391230
## Xinterview_age -7.702846e-05 0.02114834
## Xdemo_race_hispanic1 3.473852e-02 0.02310743

```

## Male participants

```

##
## Family: gaussian
## Link function: identity
##
## Formula:
## cbcl_scr_syn_withdep_r ~ hormone_scr_ert_mean + PDS_score + race.ethnicity.5level +
##   interview_age + demo_race_hispanic
##
## Parametric coefficients:
##               Estimate Std. Error t value Pr(>|t|)
## (Intercept)    0.3727478  0.5767911   0.646  0.5182
## hormone_scr_ert_mean 0.0007553  0.0022548   0.335  0.7377
## PDS_score      0.2171594  0.0659443   3.293  0.0010 **
## race.ethnicity.5levelBlack 0.5881850  0.2385540   2.466  0.0137 *
## race.ethnicity.5levelMixed 0.6307270  0.2394854   2.634  0.0085 **
## race.ethnicity.5levelOther 0.4227457  0.2756505   1.534  0.1252
## race.ethnicity.5levelWhite 0.4077449  0.2229245   1.829  0.0675 .
## interview_age  -0.0005025  0.0046086  -0.109  0.9132
## demo_race_hispanic1  0.0411906  0.0911900   0.452  0.6515
## ---
## Signif. codes:  0 '***' 0.001 '**' 0.01 '*' 0.05 '.' 0.1 ' ' 1
##
##
## R-sq.(adj) = 0.00735
## lmer.REML = 10433 Scale est. = 2.241 n = 2651

##               stdcoef      stdse
## X(Intercept)    0.00000000 0.00000000
## Xhormone_scr_ert_mean 0.006757970 0.02017453
## XPDS_score      0.068007915 0.02065180
## Xrace.ethnicity.5levelBlack 0.119357650 0.04840866
## Xrace.ethnicity.5levelMixed 0.119687573 0.04544506
## Xrace.ethnicity.5levelOther 0.051973569 0.03388927
## Xrace.ethnicity.5levelWhite 0.111447014 0.06093092
## Xinterview_age  -0.002178819 0.01998401
## Xdemo_race_hispanic1  0.009457890 0.02093838

```

## 1.18 Model: CBCL Withdrawn-Depressed ~ Testosterone + Pubertal category

### Female participants

```

##
## Family: gaussian
## Link function: identity

```

```

##
## Formula:
## cbcl_scr_syn_withdep_r ~ hormone_scr_ert_mean + pds_p_ss_category +
##   race.ethnicity.5level + interview_age + demo_race_hispanic
##
## Parametric coefficients:
##               Estimate Std. Error t value Pr(>|t|)
## (Intercept)      0.686454   0.562795   1.220  0.22269
## hormone_scr_ert_mean -0.000543   0.002084  -0.261  0.79440
## pds_p_ss_categoryEarly  0.223344   0.086901   2.570  0.01023 *
## pds_p_ss_categoryLate   0.686797   0.226687   3.030  0.00247 **
## pds_p_ss_categoryMid    0.353466   0.083518   4.232  2.4e-05 ***
## race.ethnicity.5levelBlack 0.155767   0.227619   0.684  0.49383
## race.ethnicity.5levelMixed 0.389973   0.226276   1.723  0.08494 .
## race.ethnicity.5levelOther 0.529753   0.259864   2.039  0.04160 *
## race.ethnicity.5levelWhite 0.241722   0.211807   1.141  0.25388
## interview_age        -0.002133   0.004488  -0.475  0.63468
## demo_race_hispanic1    0.112749   0.092161   1.223  0.22130
## ---
## Signif. codes:  0 '***' 0.001 '**' 0.01 '*' 0.05 '.' 0.1 ' ' 1
##
##
## R-sq.(adj) =  0.0118
## lmer.REML = 9191.5  Scale est. = 1.5977    n = 2453

##               stdcoef      stdse
## X(Intercept)      0.000000000 0.000000000
## Xhormone_scr_ert_mean -0.005591769 0.02145476
## Xpds_p_ss_categoryEarly  0.060730167 0.02362957
## Xpds_p_ss_categoryLate   0.064744089 0.02136966
## Xpds_p_ss_categoryMid    0.110319132 0.02606658
## Xrace.ethnicity.5levelBlack 0.034588750 0.05054392
## Xrace.ethnicity.5levelMixed 0.083337296 0.04835525
## Xrace.ethnicity.5levelOther 0.072405969 0.03551784
## Xrace.ethnicity.5levelWhite 0.072816912 0.06380542
## Xinterview_age        -0.010188454 0.02144014
## Xdemo_race_hispanic1    0.028298439 0.02313107

```

## Male participants

```

##
## Family: gaussian
## Link function: identity
##
## Formula:
## cbcl_scr_syn_withdep_r ~ hormone_scr_ert_mean + pds_p_ss_category +
##   race.ethnicity.5level + interview_age + demo_race_hispanic
##
## Parametric coefficients:
##               Estimate Std. Error t value Pr(>|t|)
## (Intercept)      0.5150833   0.5811894   0.886  0.37556
## hormone_scr_ert_mean  0.0010364   0.0022494   0.461  0.64501
## pds_p_ss_categoryEarly  0.1520206   0.0812850   1.870  0.06156 .

```

```

## pds_p_ss_categoryLate      0.0544412  0.5016980  0.109  0.91360
## pds_p_ss_categoryMid      0.4611184  0.1634376  2.821  0.00482 **
## race.ethnicity.5levelBlack 0.5902341  0.2389072  2.471  0.01355 *
## race.ethnicity.5levelMixed 0.6337494  0.2396387  2.645  0.00823 **
## race.ethnicity.5levelOther 0.4217610  0.2759530  1.528  0.12654
## race.ethnicity.5levelWhite 0.4137111  0.2230677  1.855  0.06376 .
## interview_age              0.0001616  0.0046033  0.035  0.97200
## demo_race_hispanic1       0.0322896  0.0916169  0.352  0.72454
## ---
## Signif. codes:  0 '***' 0.001 '**' 0.01 '*' 0.05 '.' 0.1 ' ' 1
##
##
## R-sq.(adj) =  0.00641
## lmer.REML = 10435  Scale est. = 2.2583    n = 2651

##                                stdcoef      stdse
## X(Intercept)                   0.000000000  0.00000000
## Xhormone_scr_ert_mean           0.0092731138  0.02012577
## Xpds_p_ss_categoryEarly         0.0379644485  0.02029949
## Xpds_p_ss_categoryLate         0.0021116679  0.01945987
## Xpds_p_ss_categoryMid          0.0575384257  0.02039376
## Xrace.ethnicity.5levelBlack     0.1197734586  0.04848034
## Xrace.ethnicity.5levelMixed     0.1202611086  0.04547416
## Xrace.ethnicity.5levelOther     0.0518525047  0.03392646
## Xrace.ethnicity.5levelWhite     0.1130777430  0.06097005
## Xinterview_age                  0.0007007875  0.01996094
## Xdemo_race_hispanic1           0.0074141019  0.02103640

```

## 1.19 Model: CBCL Depressed DSM-5 ~ Testosterone + PDS

### Female participants

```

##
## Family: gaussian
## Link function: identity
##
## Formula:
## cbcl_scr_dsm5_depress_r ~ hormone_scr_ert_mean + PDS_score +
##   race.ethnicity.5level + interview_age + demo_race_hispanic
##
## Parametric coefficients:
##              Estimate Std. Error t value Pr(>|t|)
## (Intercept)   0.2843730  0.6470054   0.440  0.66032
## hormone_scr_ert_mean -0.0003191  0.0024663  -0.129  0.89707
## PDS_score      0.1832904  0.0577771   3.172  0.00153 **
## race.ethnicity.5levelBlack 0.1673917  0.2681722   0.624  0.53256
## race.ethnicity.5levelMixed 0.6327813  0.2671638   2.369  0.01794 *
## race.ethnicity.5levelOther 0.8149754  0.3072112   2.653  0.00803 **
## race.ethnicity.5levelWhite 0.5234749  0.2496598   2.097  0.03612 *
## interview_age   0.0003987  0.0051849   0.077  0.93870
## demo_race_hispanic1 0.0621108  0.1074870   0.578  0.56342
## ---
## Signif. codes:  0 '***' 0.001 '**' 0.01 '*' 0.05 '.' 0.1 ' ' 1

```

```
##
##
## R-sq.(adj) = 0.00875
## lmer.REML = 9983.8 Scale est. = 1.7485 n = 2453

##                stdcoef      stdse
## X(Intercept)      0.00000000 0.00000000
## Xhormone_scr_ert_mean -0.002775311 0.02145079
## XPDS_score         0.071157860 0.02243049
## Xrace.ethnicity.5levelBlack 0.031396751 0.05029959
## Xrace.ethnicity.5levelMixed 0.114221486 0.04822494
## Xrace.ethnicity.5levelOther 0.094088220 0.03546727
## Xrace.ethnicity.5levelWhite 0.133199563 0.06352658
## Xinterview_age     0.001608878 0.02092015
## Xdemo_race_hispanic1 0.013167622 0.02278749
```

### Male participants

```
##
## Family: gaussian
## Link function: identity
##
## Formula:
## cbcl_scr_dsm5_depress_r ~ hormone_scr_ert_mean + PDS_score +
##   race.ethnicity.5level + interview_age + demo_race_hispanic
##
## Parametric coefficients:
##                Estimate Std. Error t value Pr(>|t|)
## (Intercept)      0.4909365  0.7131053   0.688 0.491231
## hormone_scr_ert_mean -0.0002916  0.0027999  -0.104 0.917070
## PDS_score         0.2681471  0.0813222   3.297 0.000989 ***
## race.ethnicity.5levelBlack 0.4893579  0.2957950   1.654 0.098169 .
## race.ethnicity.5levelMixed 0.6794781  0.2959397   2.296 0.021754 *
## race.ethnicity.5levelOther 0.4969081  0.3407400   1.458 0.144871
## race.ethnicity.5levelWhite 0.5039662  0.2763480   1.824 0.068316 .
## interview_age     0.0003636  0.0056900   0.064 0.949058
## demo_race_hispanic1 -0.0390134  0.1169369  -0.334 0.738687
## ---
## Signif. codes:  0 '***' 0.001 '**' 0.01 '*' 0.05 '.' 0.1 ' ' 1
##
##
## R-sq.(adj) = 0.00329
## lmer.REML = 11523 Scale est. = 2.9467 n = 2651

##                stdcoef      stdse
## X(Intercept)      0.00000000 0.00000000
## Xhormone_scr_ert_mean -0.002121083 0.02036850
## XPDS_score         0.068277888 0.02070695
## Xrace.ethnicity.5levelBlack 0.080740050 0.04880376
## Xrace.ethnicity.5levelMixed 0.104835714 0.04566012
## Xrace.ethnicity.5levelOther 0.049671305 0.03406063
## Xrace.ethnicity.5levelWhite 0.111997288 0.06141329
## Xinterview_age     0.001281818 0.02006094
## Xdemo_race_hispanic1 -0.007283433 0.02183101
```

## 1.20 Model: CBCL Depressed DSM-5 ~ Testosterone + Pubertal category

### Female participants

```
##
## Family: gaussian
## Link function: identity
##
## Formula:
## cbcl_scr_dsm5_depress_r ~ hormone_scr_ert_mean + pds_p_ss_category +
##   race.ethnicity.5level + interview_age + demo_race_hispanic
##
## Parametric coefficients:
##               Estimate Std. Error t value Pr(>|t|)
## (Intercept)    0.5842775  0.6591968   0.886  0.37552
## hormone_scr_ert_mean -0.0002682  0.0024428  -0.110  0.91259
## pds_p_ss_categoryEarly  0.2207987  0.1019876   2.165  0.03049 *
## pds_p_ss_categoryLate   0.4844084  0.2650177   1.828  0.06770 .
## pds_p_ss_categoryMid    0.3871347  0.0983396   3.937 8.49e-05 ***
## race.ethnicity.5levelBlack 0.1527621  0.2682545   0.569  0.56909
## race.ethnicity.5levelMixed 0.6344235  0.2670693   2.376  0.01760 *
## race.ethnicity.5levelOther 0.8202047  0.3068257   2.673  0.00756 **
## race.ethnicity.5levelWhite 0.5327023  0.2495551   2.135  0.03289 *
## interview_age        -0.0015013  0.0052556  -0.286  0.77516
## demo_race_hispanic1   0.0432026  0.1078722   0.400  0.68882
## ---
## Signif. codes:  0 '***' 0.001 '**' 0.01 '*' 0.05 '.' 0.1 ' ' 1
##
##
## R-sq.(adj) =  0.0101
## lmer.REML = 9980.8  Scale est. = 1.7325    n = 2453

##               stdcoef      stdse
## X(Intercept)    0.00000000  0.00000000
## Xhormone_scr_ert_mean -0.002332619  0.02124622
## Xpds_p_ss_categoryEarly  0.050712757  0.02342438
## Xpds_p_ss_categoryLate   0.038572117  0.02110263
## Xpds_p_ss_categoryMid    0.102059963  0.02592519
## Xrace.ethnicity.5levelBlack 0.028652756  0.05031503
## Xrace.ethnicity.5levelMixed 0.114517906  0.04820789
## Xrace.ethnicity.5levelOther 0.094691946  0.03542276
## Xrace.ethnicity.5levelWhite 0.135547491  0.06349994
## Xinterview_age        -0.006057651  0.02120532
## Xdemo_race_hispanic1   0.009159043  0.02286914
```

### Male participants

```
##
## Family: gaussian
## Link function: identity
##
## Formula:
## cbcl_scr_dsm5_depress_r ~ hormone_scr_ert_mean + pds_p_ss_category +
```

```

##      race.ethnicity.5level + interview_age + demo_race_hispanic
##
## Parametric coefficients:
##              Estimate Std. Error t value Pr(>|t|)
## (Intercept)      7.018e-01  7.183e-01  0.977  0.32867
## hormone_scr_ert_mean  1.921e-05  2.793e-03  0.007  0.99451
## pds_p_ss_categoryEarly  2.543e-01  1.000e-01  2.542  0.01108 *
## pds_p_ss_categoryLate   5.955e-02  6.154e-01  0.097  0.92292
## pds_p_ss_categoryMid    5.284e-01  2.014e-01  2.624  0.00875 **
## race.ethnicity.5levelBlack  4.865e-01  2.961e-01  1.643  0.10052
## race.ethnicity.5levelMixed  6.853e-01  2.961e-01  2.315  0.02069 *
## race.ethnicity.5levelOther  5.026e-01  3.410e-01  1.474  0.14071
## race.ethnicity.5levelWhite  5.145e-01  2.764e-01  1.861  0.06284 .
## interview_age          7.681e-04  5.683e-03  0.135  0.89251
## demo_race_hispanic1    -3.352e-02  1.174e-01 -0.456  0.64841
## ---
## Signif. codes:  0 '***' 0.001 '**' 0.01 '*' 0.05 '.' 0.1 ' ' 1
##
##
## R-sq.(adj) =  0.00269
## lmer.REML = 11523  Scale est. = 2.9327    n = 2651

##              stdcoef      stdse
## X(Intercept)      0.0000000000 0.00000000
## Xhormone_scr_ert_mean  0.0001397591 0.02031649
## Xpds_p_ss_categoryEarly  0.0516292897 0.02031036
## Xpds_p_ss_categoryLate   0.0018780272 0.01940858
## Xpds_p_ss_categoryMid    0.0536036605 0.02043070
## Xrace.ethnicity.5levelBlack  0.0802724647 0.04885966
## Xrace.ethnicity.5levelMixed  0.1057399707 0.04567799
## Xrace.ethnicity.5levelOther  0.0502374363 0.03409148
## Xrace.ethnicity.5levelWhite  0.1143273575 0.06142974
## Xinterview_age          0.0027079279 0.02003763
## Xdemo_race_hispanic1    -0.0099909238 0.02190857

```

## 2—Reward~Puberty—

### 2.1 Model: BIS-BAS-RR ~ PDS

#### Female participants

```
##
## Family: gaussian
## Link function: identity
##
## Formula:
## bisbas_ss_basm_rr_z ~ PDS_score + interview_age
##
## Parametric coefficients:
##           Estimate Std. Error t value Pr(>|t|)
## (Intercept)  0.395174  0.306057  1.291  0.19675
## PDS_score    0.074580  0.027050  2.757  0.00587 **
## interview_age -0.004766  0.002626  -1.814  0.06972 .
## ---
## Signif. codes:  0 '***' 0.001 '**' 0.01 '*' 0.05 '.' 0.1 ' ' 1
##
##
## R-sq.(adj) =  0.00449
## lmer.REML = 7544.9  Scale est. = 0.75244  n = 2690

##           stdcoef      stdse
## X(Intercept)  0.00000000 0.00000000
## XPDS_score    0.05558130 0.02015902
## Xinterview_age -0.03622943 0.01996716
```

#### Male participants

```
##
## Family: gaussian
## Link function: identity
##
## Formula:
## bisbas_ss_basm_rr_z ~ PDS_score + interview_age
##
## Parametric coefficients:
##           Estimate Std. Error t value Pr(>|t|)
## (Intercept)  0.164447  0.289455  0.568  0.56999
## PDS_score    0.091023  0.033987  2.678  0.00744 **
## interview_age -0.001822  0.002450  -0.743  0.45724
## ---
## Signif. codes:  0 '***' 0.001 '**' 0.01 '*' 0.05 '.' 0.1 ' ' 1
##
##
## R-sq.(adj) =  0.00265
## lmer.REML = 8052.9  Scale est. = 0.7399  n = 2907

##           stdcoef      stdse
```



```
## X(Intercept)      0.00000000 0.00000000
## XPDS_score       0.05105448 0.01906309
## Xinterview_age  -0.01407487 0.01893078
```

## 2.2 Model : Reaction Time ~ PDS

### Female participants

```
##
## Family: gaussian
## Link function: identity
##
## Formula:
## rt_diff_large_neutral_z ~ PDS_score + interview_age
##
## Parametric coefficients:
##           Estimate Std. Error t value Pr(>|t|)
## (Intercept) -0.572358  0.316549  -1.808  0.0707 .
## PDS_score   -0.020889  0.028535  -0.732  0.4642
## interview_age 0.005457  0.002728   2.000  0.0456 *
## ---
## Signif. codes:  0 '***' 0.001 '**' 0.01 '*' 0.05 '.' 0.1 ' ' 1
##
##
## R-sq.(adj) =  0.00104
## lmer.REML =  5938  Scale est. = 0.67938  n = 2201

##           stdcoef      stdse
## X(Intercept)  0.00000000 0.00000000
## XPDS_score   -0.01620865 0.02214117
## Xinterview_age 0.04407552 0.02203886

##
## Family: gaussian
## Link function: identity
##
## Formula:
## rt_diff_large_small_z ~ PDS_score + interview_age
##
## Parametric coefficients:
##           Estimate Std. Error t value Pr(>|t|)
## (Intercept) -0.349121  0.318183  -1.097  0.273
## PDS_score   -0.026958  0.028604  -0.942  0.346
## interview_age 0.003428  0.002742   1.250  0.211
##
##
## R-sq.(adj) =  0.000134
## lmer.REML = 5963.2  Scale est. = 0.77188  n = 2201

##           stdcoef      stdse
## X(Intercept)  0.00000000 0.00000000
## XPDS_score   -0.02082256 0.02209392
## Xinterview_age 0.02756625 0.02204520
```

## Male participants

```
##
## Family: gaussian
## Link function: identity
##
## Formula:
## rt_diff_large_neutral_z ~ PDS_score + interview_age
##
## Parametric coefficients:
##           Estimate Std. Error t value Pr(>|t|)
## (Intercept)  0.1111430  0.2929755   0.379   0.7045
## PDS_score    -0.0632857  0.0355353  -1.781   0.0751 .
## interview_age -0.0003222  0.0024828  -0.130   0.8968
## ---
## Signif. codes:  0 '***' 0.001 '**' 0.01 '*' 0.05 '.' 0.1 ' ' 1
##
##
## R-sq.(adj) =  0.000741
## lmer.REML = 5939.1  Scale est. = 0.71204  n = 2297

##           stdcoef      stdse
## X(Intercept)  0.000000000 0.00000000
## XPDS_score    -0.037980395 0.02132623
## Xinterview_age -0.002759926 0.02126704

##
## Family: gaussian
## Link function: identity
##
## Formula:
## rt_diff_large_small_z ~ PDS_score + interview_age
##
## Parametric coefficients:
##           Estimate Std. Error t value Pr(>|t|)
## (Intercept)  0.0232816  0.2965386   0.079   0.937
## PDS_score    -0.0239408  0.0358885  -0.667   0.505
## interview_age  0.0001343  0.0025139   0.053   0.957
##
##
## R-sq.(adj) = -0.000678
## lmer.REML = 6016  Scale est. = 0.79698  n = 2297

##           stdcoef      stdse
## X(Intercept)  0.000000000 0.00000000
## XPDS_score    -0.014143995 0.02120258
## Xinterview_age  0.001132671 0.02119757
```

## 2.3 Model: Caudate Anticipation ~ PDS

### Female participants

```
##
```

```

## Family: gaussian
## Link function: identity
##
## Formula:
## caudate_rvsn_ant_z ~ PDS_score + interview_age
##
## Parametric coefficients:
##           Estimate Std. Error t value Pr(>|t|)
## (Intercept) -0.483420  0.318838  -1.516  0.1296
## PDS_score    -0.049471  0.028595  -1.730  0.0838 .
## interview_age  0.004869  0.002743   1.775  0.0760 .
## ---
## Signif. codes:  0 '***' 0.001 '**' 0.01 '*' 0.05 '.' 0.1 ' ' 1
##
##
## R-sq.(adj) =  0.00193
## lmer.REML = 5350.3  Scale est. = 0.77536  n = 2044

##           stdcoef      stdse
## X(Intercept)  0.00000000 0.00000000
## XPDS_score    -0.03986291 0.02304081
## Xinterview_age 0.04069642 0.02292625

```

## Male participants

```

##
## Family: gaussian
## Link function: identity
##
## Formula:
## caudate_rvsn_ant_z ~ PDS_score + interview_age
##
## Parametric coefficients:
##           Estimate Std. Error t value Pr(>|t|)
## (Intercept) -0.186131  0.341694  -0.545  0.586
## PDS_score    -0.008219  0.041635  -0.197  0.844
## interview_age  0.001612  0.002897   0.556  0.578
##
##
## R-sq.(adj) = -0.000776
## lmer.REML = 5730.1  Scale est. = 0.78555  n = 2060

##           stdcoef      stdse
## X(Intercept)  0.00000000 0.00000000
## XPDS_score    -0.004462425 0.02260454
## Xinterview_age 0.012518023 0.02249980

```

## 2.4 Model B: Putamen Anticipation ~ PDS

### Female participants

```
##
```

```

## Family: gaussian
## Link function: identity
##
## Formula:
## putamen_rvsn_ant_z ~ PDS_score + interview_age
##
## Parametric coefficients:
##           Estimate Std. Error t value Pr(>|t|)
## (Intercept) -0.372726  0.310423  -1.201  0.23001
## PDS_score    -0.077949  0.027849  -2.799  0.00517 **
## interview_age  0.004245  0.002670   1.590  0.11202
## ---
## Signif. codes:  0 '***' 0.001 '**' 0.01 '*' 0.05 '.' 0.1 ' ' 1
##
##
## R-sq.(adj) =  0.00378
## lmer.REML = 5233.6  Scale est. = 0.73005  n = 2041

##           stdcoef      stdse
## X(Intercept)  0.00000000 0.00000000
## XPDS_score    -0.06444037 0.02302285
## Xinterview_age 0.03643015 0.02291392

```

## Male participants

```

##
## Family: gaussian
## Link function: identity
##
## Formula:
## putamen_rvsn_ant_z ~ PDS_score + interview_age
##
## Parametric coefficients:
##           Estimate Std. Error t value Pr(>|t|)
## (Intercept) -0.422958  0.329720  -1.283  0.200
## PDS_score    0.005677  0.040377   0.141  0.888
## interview_age  0.003507  0.002797   1.254  0.210
##
##
## R-sq.(adj) = -9.18e-05
## lmer.REML = 5571.2  Scale est. = 0.85641  n = 2057

##           stdcoef      stdse
## X(Intercept)  0.00000000 0.00000000
## XPDS_score    0.003177134 0.02259754
## Xinterview_age 0.028240686 0.02252802

```

## 2.5 Model: Accumbens Anticipation ~ PDS

### Female participants

```
##
```

```

## Family: gaussian
## Link function: identity
##
## Formula:
## accumbens_rvsn_ant_z ~ PDS_score + interview_age
##
## Parametric coefficients:
##           Estimate Std. Error t value Pr(>|t|)
## (Intercept) -0.0968160  0.2446591  -0.396   0.692
## PDS_score    -0.0008552  0.0219117  -0.039   0.969
## interview_age  0.0009134  0.0021051   0.434   0.664
##
##
## R-sq.(adj) = -0.000795
## lmer.REML = 4276.4  Scale est. = 0.44122  n = 2044

##           stdcoef      stdse
## X(Intercept)  0.000000000 0.00000000
## XPDS_score    -0.0009005018 0.02307352
## Xinterview_age 0.0099580823 0.02295055

```

## Male participants

```

##
## Family: gaussian
## Link function: identity
##
## Formula:
## accumbens_rvsn_ant_z ~ PDS_score + interview_age
##
## Parametric coefficients:
##           Estimate Std. Error t value Pr(>|t|)
## (Intercept)  0.324185  0.256773   1.263   0.207
## PDS_score     0.004833  0.031187   0.155   0.877
## interview_age -0.002717  0.002178  -1.247   0.212
##
##
## R-sq.(adj) = -0.000206
## lmer.REML = 4574.9  Scale est. = 0.51375  n = 2059

##           stdcoef      stdse
## X(Intercept)  0.00000000 0.00000000
## XPDS_score    0.00347335 0.02241537
## Xinterview_age -0.02794604 0.02240798

```

## 2.6 Model: Caudate Feedback ~ PDS

### Female participants

```

##
## Family: gaussian
## Link function: identity

```

```

##
## Formula:
## caudate_posvsneg_feedback_z ~ PDS_score + interview_age
##
## Parametric coefficients:
##           Estimate Std. Error t value Pr(>|t|)
## (Intercept)  0.879700  0.304751  2.887  0.00394 **
## PDS_score    -0.021140  0.027194 -0.777  0.43703
## interview_age -0.007289  0.002625 -2.777  0.00553 **
## ---
## Signif. codes:  0 '***' 0.001 '**' 0.01 '*' 0.05 '.' 0.1 ' ' 1
##
##
## R-sq.(adj) =  0.00389
## lmer.REML = 5192.5  Scale est. = 0.73778  n = 2042

##           stdcoef      stdse
## X(Intercept)  0.00000000 0.00000000
## XPDS_score    -0.01771233 0.02278498
## Xinterview_age -0.06327810 0.02278498

```

## Male participants

```

##
## Family: gaussian
## Link function: identity
##
## Formula:
## caudate_posvsneg_feedback_z ~ PDS_score + interview_age
##
## Parametric coefficients:
##           Estimate Std. Error t value Pr(>|t|)
## (Intercept) -0.035148  0.308762 -0.114  0.9094
## PDS_score    -0.077997  0.037515 -2.079  0.0377 *
## interview_age  0.001494  0.002619  0.570  0.5686
## ---
## Signif. codes:  0 '***' 0.001 '**' 0.01 '*' 0.05 '.' 0.1 ' ' 1
##
##
## R-sq.(adj) =  0.00119
## lmer.REML = 5321.7  Scale est. = 0.77007  n = 2058

##           stdcoef      stdse
## X(Intercept)  0.00000000 0.00000000
## XPDS_score    -0.04660337 0.02241512
## Xinterview_age  0.01277557 0.02240242

```

## 2.7 Model: Putamen Feedback ~ PDS

### Female participants

```
##
```

```

## Family: gaussian
## Link function: identity
##
## Formula:
## putamen_posvsneg_feedback_z ~ PDS_score + interview_age
##
## Parametric coefficients:
##           Estimate Std. Error t value Pr(>|t|)
## (Intercept)  0.553835  0.291446  1.900  0.0575 .
## PDS_score    0.005590  0.026008  0.215  0.8298
## interview_age -0.005130  0.002509  -2.044  0.0410 *
## ---
## Signif. codes:  0 '***' 0.001 '**' 0.01 '*' 0.05 '.' 0.1 ' ' 1
##
##
## R-sq.(adj) =  0.00101
## lmer.REML = 5000.7  Scale est. = 0.67013  n = 2042

##           stdcoef      stdse
## X(Intercept)  0.000000000 0.000000000
## XPDS_score    0.004926153 0.02291867
## Xinterview_age -0.046761914 0.02287379

```

## Male participants

```

##
## Family: gaussian
## Link function: identity
##
## Formula:
## putamen_posvsneg_feedback_z ~ PDS_score + interview_age
##
## Parametric coefficients:
##           Estimate Std. Error t value Pr(>|t|)
## (Intercept)  0.2523532  0.3084372  0.818  0.413
## PDS_score    -0.0586858  0.0374986  -1.565  0.118
## interview_age -0.0007996  0.0026095  -0.306  0.759
##
##
## R-sq.(adj) =  0.000261
## lmer.REML = 5293.1  Scale est. = 0.75008  n = 2061

##           stdcoef      stdse
## X(Intercept)  0.000000000 0.000000000
## XPDS_score    -0.035327960 0.02257361
## Xinterview_age -0.006884135 0.02246763

```

## 2.8 Model: Accumbens Feedback ~ PDS

### Female participants

```
##
```

```

## Family: gaussian
## Link function: identity
##
## Formula:
## accumbens_posvsneg_feedback_z ~ PDS_score + interview_age
##
## Parametric coefficients:
##           Estimate Std. Error t value Pr(>|t|)
## (Intercept)  0.457768  0.230801  1.983  0.0475 *
## PDS_score    -0.001013  0.020566  -0.049  0.9607
## interview_age -0.003938  0.001988  -1.981  0.0477 *
## ---
## Signif. codes:  0 '***' 0.001 '**' 0.01 '*' 0.05 '.' 0.1 ' ' 1
##
##
## R-sq.(adj) =  0.00106
## lmer.REML = 4078.6  Scale est. = 0.42369  n = 2050

##           stdcoef      stdse
## X(Intercept)  0.000000000 0.000000000
## XPDS_score    -0.001122932 0.02280433
## Xinterview_age -0.045142102 0.02278977

```

## Male participants

```

##
## Family: gaussian
## Link function: identity
##
## Formula:
## accumbens_posvsneg_feedback_z ~ PDS_score + interview_age
##
## Parametric coefficients:
##           Estimate Std. Error t value Pr(>|t|)
## (Intercept) -0.068876  0.248955  -0.277  0.782
## PDS_score    -0.040808  0.030313  -1.346  0.178
## interview_age  0.001428  0.002110   0.677  0.499
##
##
## R-sq.(adj) = -4.31e-05
## lmer.REML = 4395.9  Scale est. = 0.42192  n = 2054

##           stdcoef      stdse
## X(Intercept)  0.000000000 0.000000000
## XPDS_score    -0.03050319 0.02265835
## Xinterview_age  0.01525776 0.02254534

```

## 2.9 Model: OFC Anticipation ~ PDS

### Female participants

```
##
```



```

## Family: gaussian
## Link function: identity
##
## Formula:
## l0FC_rvs_n_ant_z ~ PDS_score + interview_age
##
## Parametric coefficients:
##           Estimate Std. Error t value Pr(>|t|)
## (Intercept)  0.0590386  0.2040969   0.289   0.772
## PDS_score    0.0037308  0.0182241   0.205   0.838
## interview_age -0.0004418  0.0017592  -0.251   0.802
##
##
## R-sq.(adj) = -0.000933
## lmer.REML = 3536.8  Scale est. = 0.29608  n = 2038

```

```

##           stdcoef      stdse
## X(Intercept)  0.000000000  0.000000000
## XPDS_score    0.004699434  0.02295576
## Xinterview_age -0.005755180  0.02291520

```

```

##
## Family: gaussian
## Link function: identity
##
## Formula:
## m0FC_rvs_n_ant_z ~ PDS_score + interview_age
##
## Parametric coefficients:
##           Estimate Std. Error t value Pr(>|t|)
## (Intercept)  0.039678  0.234446   0.169   0.866
## PDS_score    0.008097  0.020912   0.387   0.699
## interview_age -0.000431  0.002020  -0.213   0.831
##
##
## R-sq.(adj) = -0.000901
## lmer.REML = 4110.5  Scale est. = 0.43526  n = 2039

```

```

##           stdcoef      stdse
## X(Intercept)  0.000000000  0.000000000
## XPDS_score    0.008856036  0.02287269
## Xinterview_age -0.004880368  0.02287269

```

## Male participants

```

##
## Family: gaussian
## Link function: identity
##
## Formula:
## l0FC_rvs_n_ant_z ~ PDS_score + interview_age
##
## Parametric coefficients:

```

```

##           Estimate Std. Error t value Pr(>|t|)
## (Intercept) -0.222499  0.216526  -1.028  0.304
## PDS_score    0.027361  0.026581   1.029  0.303
## interview_age 0.001621  0.001839   0.882  0.378
##
##
## R-sq.(adj) = 0.000144
## lmer.REML = 3835.2  Scale est. = 0.34288  n = 2053

##           stdcoef      stdse
## X(Intercept)  0.00000000 0.00000000
## XPDS_score    0.02328767 0.02262399
## Xinterview_age 0.01987765 0.02254881

##
## Family: gaussian
## Link function: identity
##
## Formula:
## mOFC_rvsn_ant_z ~ PDS_score + interview_age
##
## Parametric coefficients:
##           Estimate Std. Error t value Pr(>|t|)
## (Intercept) -1.019e-01  2.360e-01  -0.432  0.6658
## PDS_score    7.386e-02  2.880e-02   2.565  0.0104 *
## interview_age 2.244e-05  2.005e-03   0.011  0.9911
## ---
## Signif. codes:  0 '***' 0.001 '**' 0.01 '*' 0.05 '.' 0.1 ' ' 1
##
##
## R-sq.(adj) = 0.00234
## lmer.REML = 4188.7  Scale est. = 0.40149  n = 2048

##           stdcoef      stdse
## X(Intercept)  0.0000000000 0.00000000
## XPDS_score    0.0577094026 0.02250055
## Xinterview_age 0.0002516722 0.02248097

```

## 2.10 Model: OFC Feedback ~ PDS

### Female participants

```

##
## Family: gaussian
## Link function: identity
##
## Formula:
## lOFC_posvsneg_feedback_z ~ PDS_score + interview_age
##
## Parametric coefficients:
##           Estimate Std. Error t value Pr(>|t|)
## (Intercept)  0.250497  0.179292   1.397  0.163

```

```

## PDS_score      0.009944  0.016003  0.621  0.534
## interview_age -0.002448  0.001545 -1.585  0.113
##
##
## R-sq.(adj) = 0.000286
## lmer.REML = 3018.9  Scale est. = 0.22332  n = 2039

##                stdcoef      stdse
## X(Intercept)    0.00000000 0.00000000
## XPDS_score      0.01423897 0.02291448
## Xinterview_age -0.03622689 0.02286299

##
## Family: gaussian
## Link function: identity
##
## Formula:
## mOFC_posvsneg_feedback_z ~ PDS_score + interview_age
##
## Parametric coefficients:
##              Estimate Std. Error t value Pr(>|t|)
## (Intercept)  0.0649137  0.2204114  0.295  0.768
## PDS_score    0.0101010  0.0197079  0.513  0.608
## interview_age -0.0007488  0.0018984 -0.394  0.693
##
##
## R-sq.(adj) = -0.000837
## lmer.REML = 3842.5  Scale est. = 0.34392  n = 2040

##                stdcoef      stdse
## X(Intercept)    0.00000000 0.00000000
## XPDS_score      0.011820358 0.02306259
## Xinterview_age -0.009053689 0.02295243

```

## Male participants

```

##
## Family: gaussian
## Link function: identity
##
## Formula:
## lOFC_posvsneg_feedback_z ~ PDS_score + interview_age
##
## Parametric coefficients:
##              Estimate Std. Error t value Pr(>|t|)
## (Intercept) -0.255747  0.195270 -1.310  0.190
## PDS_score    0.008412  0.023793  0.354  0.724
## interview_age 0.002314  0.001657  1.396  0.163
##
##
## R-sq.(adj) = 0.000154
## lmer.REML = 3464.9  Scale est. = 0.30926  n = 2063

```

```

##               stdcoef      stdse
## X(Intercept)  0.00000000 0.00000000
## XPDS_score    0.007913114 0.02238156
## Xinterview_age 0.031243174 0.02238067

##
## Family: gaussian
## Link function: identity
##
## Formula:
## mOFC_posvsneg_feedback_z ~ PDS_score + interview_age
##
## Parametric coefficients:
##               Estimate Std. Error t value Pr(>|t|)
## (Intercept)  -0.0388540  0.2246313  -0.173   0.863
## PDS_score     0.0051199  0.0274503   0.187   0.852
## interview_age  0.0005642  0.0019075   0.296   0.767
##
##
## R-sq.(adj) = -0.000943
## lmer.REML = 4026.3  Scale est. = 0.31384  n = 2061

##               stdcoef      stdse
## X(Intercept)  0.00000000 0.00000000
## XPDS_score    0.004195959 0.02249664
## Xinterview_age 0.006638855 0.02244611

```

## 2.11 Model: Caudate Anticipation ~ Testosterone

### Female participants

```

##
## Family: gaussian
## Link function: identity
##
## Formula:
## caudate_rvsn_ant_z ~ hormone_scr_ert_mean + interview_age
##
## Parametric coefficients:
##               Estimate Std. Error t value Pr(>|t|)
## (Intercept)    -0.531423  0.328131  -1.620  0.1055
## hormone_scr_ert_mean -0.001464  0.001304  -1.122  0.2618
## interview_age     0.004989  0.002807   1.777  0.0757 .
## ---
## Signif. codes:  0 '***' 0.001 '**' 0.01 '*' 0.05 '.' 0.1 ' ' 1
##
##
## R-sq.(adj) =  0.0012
## lmer.REML = 5021.6  Scale est. = 0.79211  n = 1912

##               stdcoef      stdse
## X(Intercept)    0.00000000 0.00000000
## Xhormone_scr_ert_mean -0.02656944 0.02367206
## Xinterview_age   0.04181201 0.02352831

```

## Male participants

```
##
## Family: gaussian
## Link function: identity
##
## Formula:
## caudate_rvsn_ant_z ~ hormone_scr_ert_mean + interview_age
##
## Parametric coefficients:
##           Estimate Std. Error t value Pr(>|t|)
## (Intercept)   -0.0749252  0.3460507  -0.217   0.829
## hormone_scr_ert_mean  0.0005271  0.0014419   0.366   0.715
## interview_age     0.0004707  0.0029241   0.161   0.872
##
##
## R-sq.(adj) =  -0.00095
## lmer.REML =  5192  Scale est. = 0.68188  n = 1902

##           stdcoef      stdse
## X(Intercept)      0.00000000 0.00000000
## Xhormone_scr_ert_mean 0.008604649 0.02353898
## Xinterview_age     0.003757341 0.02333946
```

## 2.12 Model B: Putamen Anticipation ~ Testosterone

### Female participants

```
##
## Family: gaussian
## Link function: identity
##
## Formula:
## putamen_rvsn_ant_z ~ hormone_scr_ert_mean + interview_age
##
## Parametric coefficients:
##           Estimate Std. Error t value Pr(>|t|)
## (Intercept)   -0.3478527  0.3189046  -1.091   0.276
## hormone_scr_ert_mean -0.0009987  0.0012676  -0.788   0.431
## interview_age     0.0031484  0.0027281   1.154   0.249
##
##
## R-sq.(adj) =  -5.42e-05
## lmer.REML = 4908.4  Scale est. = 0.74226  n = 1910

##           stdcoef      stdse
## X(Intercept)      0.00000000 0.00000000
## Xhormone_scr_ert_mean -0.01866909 0.02369479
## Xinterview_age     0.02718732 0.02355821
```

### Male participants

```
##
```

```

## Family: gaussian
## Link function: identity
##
## Formula:
## putamen_rvsn_ant_z ~ hormone_scr_ert_mean + interview_age
##
## Parametric coefficients:
##               Estimate Std. Error t value Pr(>|t|)
## (Intercept)   -0.363244  0.342533  -1.060   0.289
## hormone_scr_ert_mean 0.002011  0.001432   1.405   0.160
## interview_age   0.002573  0.002891   0.890   0.374
##
##
## R-sq.(adj) =  0.000718
## lmer.REML =  5149  Scale est. = 0.75484  n = 1902

##               stdcoef      stdse
## X(Intercept)      0.00000000 0.00000000
## Xhormone_scr_ert_mean 0.03316219 0.02361121
## Xinterview_age     0.02075429 0.02332550

```

## 2.13 Model: Accumbens Anticipation ~ Testosterone

### Female participants

```

##
## Family: gaussian
## Link function: identity
##
## Formula:
## accumbens_rvsn_ant_z ~ hormone_scr_ert_mean + interview_age
##
## Parametric coefficients:
##               Estimate Std. Error t value Pr(>|t|)
## (Intercept)   -0.1829273  0.2500379  -0.732   0.4645
## hormone_scr_ert_mean -0.0016855  0.0009949  -1.694   0.0904 .
## interview_age   0.0021275  0.0021417   0.993   0.3207
## ---
## Signif. codes:  0 '***' 0.001 '**' 0.01 '*' 0.05 '.' 0.1 ' ' 1
##
##
## R-sq.(adj) =  0.000853
## lmer.REML = 3998.8  Scale est. = 0.43208  n = 1913

##               stdcoef      stdse
## X(Intercept)      0.00000000 0.00000000
## Xhormone_scr_ert_mean -0.04006650 0.02364976
## Xinterview_age     0.02337654 0.02353300

```

### Male participants

```
##
```

```

## Family: gaussian
## Link function: identity
##
## Formula:
## accumbens_rvsnt_ant_z ~ hormone_scr_ert_mean + interview_age
##
## Parametric coefficients:
##           Estimate Std. Error t value Pr(>|t|)
## (Intercept)      3.226e-01  2.699e-01   1.195   0.232
## hormone_scr_ert_mean -8.252e-05  1.113e-03  -0.074   0.941
## interview_age      -2.616e-03  2.280e-03  -1.148   0.251
##
##
## R-sq.(adj) =  -0.000323
## lmer.REML = 4277.2  Scale est. = 0.50131  n = 1905

##           stdcoef      stdse
## X(Intercept)      0.00000000 0.00000000
## Xhormone_scr_ert_mean -0.001723489 0.02325383
## Xinterview_age      -0.026653729 0.02322433

```

## 2.14 Model: Caudate Feedback ~ Testosterone

### Female participants

```

##
## Family: gaussian
## Link function: identity
##
## Formula:
## caudate_posvsneg_feedback_z ~ hormone_scr_ert_mean + interview_age
##
## Parametric coefficients:
##           Estimate Std. Error t value Pr(>|t|)
## (Intercept)      0.964423   0.313893   3.072 0.002153 **
## hormone_scr_ert_mean 0.002594   0.001242   2.089 0.036870 *
## interview_age      -0.009086   0.002692  -3.375 0.000753 ***
## ---
## Signif. codes:  0 '***' 0.001 '**' 0.01 '*' 0.05 '.' 0.1 ' ' 1
##
##
## R-sq.(adj) =  0.00588
## lmer.REML =  4870  Scale est. = 0.74202  n = 1908

##           stdcoef      stdse
## X(Intercept)      0.00000000 0.00000000
## Xhormone_scr_ert_mean 0.04890655 0.02341514
## Xinterview_age      -0.07902547 0.02341514

```

### Male participants

```
##
```

```

## Family: gaussian
## Link function: identity
##
## Formula:
## caudate_posvsneg_feedback_z ~ hormone_scr_ert_mean + interview_age
##
## Parametric coefficients:
##           Estimate Std. Error t value Pr(>|t|)
## (Intercept)      0.0717921  0.3203480   0.224   0.823
## hormone_scr_ert_mean 0.0016157  0.0013266   1.218   0.223
## interview_age     -0.0006652  0.0027075  -0.246   0.806
##
##
## R-sq.(adj) = -0.000306
## lmer.REML = 4914.7  Scale est. = 0.76342  n = 1903

##           stdcoef      stdse
## X(Intercept)      0.00000000 0.00000000
## Xhormone_scr_ert_mean 0.028461130 0.02336805
## Xinterview_age     -0.005716953 0.02326983

```

## 2.15 Model: Putamen Feedback ~ Testosterone

### Female participants

```

##
## Family: gaussian
## Link function: identity
##
## Formula:
## putamen_posvsneg_feedback_z ~ hormone_scr_ert_mean + interview_age
##
## Parametric coefficients:
##           Estimate Std. Error t value Pr(>|t|)
## (Intercept)      0.612850  0.297927   2.057 0.03982 *
## hormone_scr_ert_mean 0.003420  0.001185   2.887 0.00393 **
## interview_age     -0.006594  0.002555  -2.581 0.00992 **
## ---
## Signif. codes:  0 '***' 0.001 '**' 0.01 '*' 0.05 '.' 0.1 ' ' 1
##
##
## R-sq.(adj) = 0.00534
## lmer.REML = 4670.6  Scale est. = 0.66657  n = 1909

##           stdcoef      stdse
## X(Intercept)      0.00000000 0.00000000
## Xhormone_scr_ert_mean 0.06777610 0.02347543
## Xinterview_age     -0.06051217 0.02344254

```

### Male participants

```
##
```



```

## Family: gaussian
## Link function: identity
##
## Formula:
## putamen_posvsneg_feedback_z ~ hormone_scr_ert_mean + interview_age
##
## Parametric coefficients:
##           Estimate Std. Error t value Pr(>|t|)
## (Intercept)    0.400731   0.318183   1.259   0.208
## hormone_scr_ert_mean 0.001473   0.001325   1.112   0.266
## interview_age   -0.003093   0.002680  -1.154   0.248
##
##
## R-sq.(adj) = -0.00011
## lmer.REML = 4880.1  Scale est. = 0.73977  n = 1907

##           stdcoef      stdse
## X(Intercept)      0.00000000 0.00000000
## Xhormone_scr_ert_mean 0.02618158 0.02355376
## Xinterview_age    -0.02681733 0.02322933

```

## 2.16 Model: Accumbens Feedback ~ Testosterone

### Female participants

```

##
## Family: gaussian
## Link function: identity
##
## Formula:
## accumbens_posvsneg_feedback_z ~ hormone_scr_ert_mean + interview_age
##
## Parametric coefficients:
##           Estimate Std. Error t value Pr(>|t|)
## (Intercept)    0.4856058   0.2310580   2.102   0.0357 *
## hormone_scr_ert_mean 0.0003708   0.0009171   0.404   0.6860
## interview_age   -0.0043599   0.0019815  -2.200   0.0279 *
## ---
## Signif. codes:  0 '***' 0.001 '**' 0.01 '*' 0.05 '.' 0.1 ' ' 1
##
##
## R-sq.(adj) = 0.00144
## lmer.REML = 3720  Scale est. = 0.40205  n = 1916

##           stdcoef      stdse
## X(Intercept)      0.00000000 0.00000000
## Xhormone_scr_ert_mean 0.009488918 0.02346939
## Xinterview_age    -0.051581945 0.02344264

```

### Male participants

```
##
```

```

## Family: gaussian
## Link function: identity
##
## Formula:
## accumbens_posvsneg_feedback_z ~ hormone_scr_ert_mean + interview_age
##
## Parametric coefficients:
##           Estimate Std. Error t value Pr(>|t|)
## (Intercept)    0.0489839  0.2610065   0.188   0.851
## hormone_scr_ert_mean 0.0014432  0.0010875   1.327   0.185
## interview_age   -0.0003314  0.0022052  -0.150   0.881
##
##
## R-sq.(adj) = 8.13e-05
## lmer.REML = 4104.6  Scale est. = 0.43257  n = 1899

##           stdcoef      stdse
## X(Intercept)      0.00000000 0.00000000
## Xhormone_scr_ert_mean 0.031321924 0.02360226
## Xinterview_age    -0.003511598 0.02336325

```

## 2.17 Model: OFC Anticipation ~ Testosterone

### Female participants

```

##
## Family: gaussian
## Link function: identity
##
## Formula:
## lOFC_rvsnt_ant_z ~ hormone_scr_ert_mean + interview_age
##
## Parametric coefficients:
##           Estimate Std. Error t value Pr(>|t|)
## (Intercept)    0.0032153  0.2104991   0.015   0.988
## hormone_scr_ert_mean -0.0006606  0.0008361  -0.790   0.430
## interview_age     0.0002883  0.0018063   0.160   0.873
##
##
## R-sq.(adj) = -0.0007
## lmer.REML = 3333.4  Scale est. = 0.30459  n = 1906

##           stdcoef      stdse
## X(Intercept)      0.00000000 0.00000000
## Xhormone_scr_ert_mean -0.018620645 0.02356633
## Xinterview_age     0.003757456 0.02354156

##
## Family: gaussian
## Link function: identity
##
## Formula:

```

```

## mOFC_rvsn_ant_z ~ hormone_scr_ert_mean + interview_age
##
## Parametric coefficients:
##           Estimate Std. Error t value Pr(>|t|)
## (Intercept)      0.0682507  0.2410390   0.283   0.777
## hormone_scr_ert_mean 0.0001874  0.0009567   0.196   0.845
## interview_age     -0.0006112  0.0020683  -0.295   0.768
##
##
## R-sq.(adj) = -0.000996
## lmer.REML = 3854.2  Scale est. = 0.43627  n = 1906

##           stdcoef      stdse
## X(Intercept)      0.000000000  0.000000000
## Xhormone_scr_ert_mean 0.004606623  0.02352115
## Xinterview_age     -0.006950428  0.02352115

```

### Male participants

```

##
## Family: gaussian
## Link function: identity
##
## Formula:
## lOFC_rvsn_ant_z ~ hormone_scr_ert_mean + interview_age
##
## Parametric coefficients:
##           Estimate Std. Error t value Pr(>|t|)
## (Intercept)     -0.2768395  0.2264293  -1.223   0.2216
## hormone_scr_ert_mean -0.0015935  0.0009445  -1.687   0.0917 .
## interview_age      0.0028287  0.0019125   1.479   0.1393
## ---
## Signif. codes:  0 '***' 0.001 '**' 0.01 '*' 0.05 '.' 0.1 ' ' 1
##
##
## R-sq.(adj) = 0.0012
## lmer.REML = 3579.8  Scale est. = 0.33303  n = 1899

##           stdcoef      stdse
## X(Intercept)      0.000000000  0.000000000
## Xhormone_scr_ert_mean -0.03950549  0.02341628
## Xinterview_age      0.03445050  0.02329201

##
## Family: gaussian
## Link function: identity
##
## Formula:
## mOFC_rvsn_ant_z ~ hormone_scr_ert_mean + interview_age
##
## Parametric coefficients:
##           Estimate Std. Error t value Pr(>|t|)
## (Intercept)     -0.204876  0.247282  -0.829   0.407

```

```

## hormone_scr_ert_mean -0.001011  0.001023  -0.988    0.323
## interview_age         0.002031  0.002091   0.972    0.331
##
##
## R-sq.(adj) = -0.000234
## lmer.REML = 3910.2  Scale est. = 0.40564  n = 1895

##                stdcoef      stdse
## X(Intercept)      0.00000000  0.00000000
## Xhormone_scr_ert_mean -0.02309696  0.02337852
## Xinterview_age     0.02266259  0.02332311

```

## 2.18 Model: OFC Feedback ~ Testosterone

### Female participants

```

##
## Family: gaussian
## Link function: identity
##
## Formula:
## lOFC_posvsneg_feedback_z ~ hormone_scr_ert_mean + interview_age
##
## Parametric coefficients:
##              Estimate Std. Error t value Pr(>|t|)
## (Intercept)    0.2773309  0.1834713   1.512  0.1308
## hormone_scr_ert_mean  0.0012000  0.0007282   1.648  0.0995 .
## interview_age    -0.0029118  0.0015740  -1.850  0.0645 .
## ---
## Signif. codes:  0 '***' 0.001 '**' 0.01 '*' 0.05 '.' 0.1 ' ' 1
##
##
## R-sq.(adj) =  0.0017
## lmer.REML = 2821.7  Scale est. = 0.21617  n = 1908

##                stdcoef      stdse
## X(Intercept)      0.00000000  0.00000000
## Xhormone_scr_ert_mean  0.03876310  0.02352205
## Xinterview_age     -0.04343638  0.02348011

##
## Family: gaussian
## Link function: identity
##
## Formula:
## mOFC_posvsneg_feedback_z ~ hormone_scr_ert_mean + interview_age
##
## Parametric coefficients:
##              Estimate Std. Error t value Pr(>|t|)
## (Intercept)    0.1195496  0.2235176   0.535  0.593
## hormone_scr_ert_mean  0.0007248  0.0008892   0.815  0.415
## interview_age    -0.0012938  0.0019163  -0.675  0.500

```

```
##
##
## R-sq.(adj) = -0.000459
## lmer.REML = 3559.8 Scale est. = 0.32991 n = 1910
```

```
##          stdcoef      stdse
## X(Intercept)      0.00000000 0.00000000
## Xhormone_scr_ert_mean 0.01931141 0.02369241
## Xinterview_age     -0.01591504 0.02357242
```

## Male participants

```
##
## Family: gaussian
## Link function: identity
##
## Formula:
## lOFC_posvsneg_feedback_z ~ hormone_scr_ert_mean + interview_age
##
```

```
## Parametric coefficients:
##          Estimate Std. Error t value Pr(>|t|)
## (Intercept)    -0.1175909  0.2030853  -0.579  0.563
## hormone_scr_ert_mean 0.0000585  0.0008427   0.069  0.945
## interview_age     0.0012925  0.0017167   0.753  0.452
```

```
##
##
## R-sq.(adj) = -0.000733
## lmer.REML = 3216.5 Scale est. = 0.31125 n = 1909
```

```
##          stdcoef      stdse
## X(Intercept)      0.00000000 0.00000000
## Xhormone_scr_ert_mean 0.001609679 0.02318664
## Xinterview_age     0.017456649 0.02318664
```

```
##
## Family: gaussian
## Link function: identity
##
## Formula:
## mOFC_posvsneg_feedback_z ~ hormone_scr_ert_mean + interview_age
##
```

```
## Parametric coefficients:
##          Estimate Std. Error t value Pr(>|t|)
## (Intercept)     0.0374550  0.2352774   0.159  0.874
## hormone_scr_ert_mean 0.0007922  0.0009749   0.813  0.417
## interview_age    -0.0001889  0.0019895  -0.095  0.924
```

```
##
##
## R-sq.(adj) = -0.000776
## lmer.REML = 3761.8 Scale est. = 0.32397 n = 1907
```

```
##          stdcoef      stdse
```

```
## X(Intercept)          0.00000000 0.00000000
## Xhormone_scr_ert_mean 0.018919183 0.02328135
## Xinterview_age       -0.002207377 0.02324932
```

## 2.19 Model: MID Reaction Time ~ Testosterone

### Female participants

```
##
## Family: gaussian
## Link function: identity
##
## Formula:
## rt_diff_large_neutral_z ~ hormone_scr_ert_mean + interview_age
##
## Parametric coefficients:
##              Estimate Std. Error t value Pr(>|t|)
## (Intercept)   -0.633165   0.323079  -1.960   0.0502 .
## hormone_scr_ert_mean -0.001511   0.001287  -1.174   0.2406
## interview_age    0.006170   0.002767   2.230   0.0259 *
## ---
## Signif. codes:  0 '***' 0.001 '**' 0.01 '*' 0.05 '.' 0.1 ' ' 1
##
##
## R-sq.(adj) = 0.00188
## lmer.REML = 5547.5 Scale est. = 0.69017 n = 2060

##              stdcoef      stdse
## X(Intercept)      0.00000000 0.00000000
## Xhormone_scr_ert_mean -0.02654532 0.02261336
## Xinterview_age      0.05031463 0.02256225

##
## Family: gaussian
## Link function: identity
##
## Formula:
## rt_diff_large_small_z ~ hormone_scr_ert_mean + interview_age
##
## Parametric coefficients:
##              Estimate Std. Error t value Pr(>|t|)
## (Intercept)   -0.3696554   0.3262044  -1.133   0.257
## hormone_scr_ert_mean -0.0008419   0.0012986  -0.648   0.517
## interview_age    0.0034240   0.0027933   1.226   0.220
##
##
## R-sq.(adj) = 4.58e-06
## lmer.REML = 5587.6 Scale est. = 0.75055 n = 2060

##              stdcoef      stdse
## X(Intercept)      0.00000000 0.00000000
## Xhormone_scr_ert_mean -0.01466609 0.02262339
## Xinterview_age      0.02768875 0.02258842
```

## Male participants

```
##
## Family: gaussian
## Link function: identity
##
## Formula:
## rt_diff_large_neutral_z ~ hormone_scr_ert_mean + interview_age
##
## Parametric coefficients:
##           Estimate Std. Error t value Pr(>|t|)
## (Intercept)    0.0837097  0.3030565   0.276   0.782
## hormone_scr_ert_mean -0.0006574  0.0012592  -0.522   0.602
## interview_age    -0.0006073  0.0025605  -0.237   0.813
##
##
## R-sq.(adj) = -0.000719
## lmer.REML = 5514.9  Scale est. = 0.71939  n = 2133
```

```
##           stdcoef      stdse
## X(Intercept)      0.00000000 0.00000000
## Xhormone_scr_ert_mean -0.01157785 0.02217728
## Xinterview_age     -0.00522356 0.02202364
```

```
##
## Family: gaussian
## Link function: identity
##
## Formula:
## rt_diff_large_small_z ~ hormone_scr_ert_mean + interview_age
##
## Parametric coefficients:
##           Estimate Std. Error t value Pr(>|t|)
## (Intercept)    0.1149651  0.3045511   0.377   0.706
## hormone_scr_ert_mean -0.0013004  0.0012582  -1.034   0.301
## interview_age    -0.0004868  0.0025746  -0.189   0.850
##
##
## R-sq.(adj) = -0.000388
## lmer.REML = 5554.6  Scale est. = 0.77615  n = 2133
```

```
##           stdcoef      stdse
## X(Intercept)      0.00000000 0.00000000
## Xhormone_scr_ert_mean -0.022694149 0.02195786
## Xinterview_age     -0.004149015 0.02194322
```

## 2.20 Model: BIS-BAS-RR ~ Testosterone

### Female participants

```
##
## Family: gaussian
```

```

## Link function: identity
##
## Formula:
## bisbas_ss_basm_rr_z ~ hormone_scr_ert_mean + interview_age
##
## Parametric coefficients:
##           Estimate Std. Error t value Pr(>|t|)
## (Intercept)      0.346680   0.314572   1.102   0.271
## hormone_scr_ert_mean -0.001039   0.001247  -0.833   0.405
## interview_age      -0.002943   0.002683  -1.097   0.273
##
##
## R-sq.(adj) = 0.000485
## lmer.REML = 7026.6 Scale est. = 0.70697 n = 2502

##           stdcoef      stdse
## X(Intercept)      0.00000000 0.00000000
## Xhormone_scr_ert_mean -0.01725639 0.02071182
## Xinterview_age      -0.02254169 0.02055015

```

## Male participants

```

##
## Family: gaussian
## Link function: identity
##
## Formula:
## bisbas_ss_basm_rr_z ~ hormone_scr_ert_mean + interview_age
##
## Parametric coefficients:
##           Estimate Std. Error t value Pr(>|t|)
## (Intercept)      0.198446   0.298864   0.664   0.5067
## hormone_scr_ert_mean 0.002152   0.001242   1.732   0.0834 .
## interview_age      -0.001610   0.002525  -0.638   0.5237
## ---
## Signif. codes:  0 '***' 0.001 '**' 0.01 '*' 0.05 '.' 0.1 ' ' 1
##
##
## R-sq.(adj) = 0.00103
## lmer.REML = 7464.6 Scale est. = 0.72311 n = 2697

##           stdcoef      stdse
## X(Intercept)      0.00000000 0.00000000
## Xhormone_scr_ert_mean 0.03464661 0.02000401
## Xinterview_age      -0.01252359 0.01963926

```



### 3—Internalizing~Reward—

#### 3.1 Model: CBCL internalizing factor ~ Nucleus Accumbens activity (anticipation stage)

##### Female participants

```
##
## Family: gaussian
## Link function: identity
##
## Formula:
## cbcl_scr_syn_internal_r ~ accumbens_rvsn_ant_z + interview_age
##
## Parametric coefficients:
##               Estimate Std. Error t value Pr(>|t|)
## (Intercept)      6.03142    1.86213   3.239  0.00122 **
## accumbens_rvsn_ant_z -0.04281    0.16866  -0.254  0.79968
## interview_age     -0.00972    0.01557  -0.624  0.53257
## ---
## Signif. codes:  0 '***' 0.001 '**' 0.01 '*' 0.05 '.' 0.1 ' ' 1
##
##
## R-sq.(adj) = -0.000632
## lmer.REML = 12626 Scale est. = 11.232    n = 2044

##               stdcoef      stdse
## X(Intercept)      0.000000000 0.00000000
## Xaccumbens_rvsn_ant_z -0.005427053 0.02138326
## Xinterview_age     -0.013435302 0.02152431
```

##### Male participants

```
##
## Family: gaussian
## Link function: identity
##
## Formula:
## cbcl_scr_syn_internal_r ~ accumbens_rvsn_ant_z + interview_age
##
## Parametric coefficients:
##               Estimate Std. Error t value Pr(>|t|)
## (Intercept)      3.25746    1.86102   1.750  0.0802 .
## accumbens_rvsn_ant_z -0.14197    0.15732  -0.902  0.3669
## interview_age      0.01252    0.01550   0.808  0.4195
## ---
## Signif. codes:  0 '***' 0.001 '**' 0.01 '*' 0.05 '.' 0.1 ' ' 1
##
##
## R-sq.(adj) = -0.000586
## lmer.REML = 12672 Scale est. = 18.374    n = 2059
```

```
##               stdcoef      stdse
## X(Intercept)      0.00000000 0.00000000
## Xaccumbens_rvsn_ant_z -0.01970131 0.02183160
## Xinterview_age      0.01786603 0.02212499
```

### 3.2 Model: CBCL internalizing factor ~ Caudate activity (anticipation stage)

#### Female participants

```
##
## Family: gaussian
## Link function: identity
##
## Formula:
## cbcl_scr_syn_internal_r ~ caudate_rvsn_ant_z + interview_age
##
## Parametric coefficients:
##               Estimate Std. Error t value Pr(>|t|)
## (Intercept)      6.09957    1.86424   3.272 0.00109 **
## caudate_rvsn_ant_z -0.02686    0.12935  -0.208 0.83552
## interview_age     -0.01023    0.01559  -0.656 0.51174
## ---
## Signif. codes:  0 '***' 0.001 '**' 0.01 '*' 0.05 '.' 0.1 ' ' 1
##
##
## R-sq.(adj) =  -0.000647
## lmer.REML = 12629  Scale est. = 11.292    n = 2044

##               stdcoef      stdse
## X(Intercept)      0.000000000 0.000000000
## Xcaudate_rvsn_ant_z -0.004436974 0.02136731
## Xinterview_age     -0.014126520 0.02152610
```

#### Male participants

```
##
## Family: gaussian
## Link function: identity
##
## Formula:
## cbcl_scr_syn_internal_r ~ caudate_rvsn_ant_z + interview_age
##
## Parametric coefficients:
##               Estimate Std. Error t value Pr(>|t|)
## (Intercept)      3.49750    1.86404   1.876 0.0608 .
## caudate_rvsn_ant_z -0.10650    0.12325  -0.864 0.3876
## interview_age      0.01067    0.01552   0.687 0.4919
## ---
## Signif. codes:  0 '***' 0.001 '**' 0.01 '*' 0.05 '.' 0.1 ' ' 1
##
##
## R-sq.(adj) =  -0.000812
## lmer.REML = 12656  Scale est. = 18.614    n = 2056
```

```
##                stdcoef      stdse
## X(Intercept)    0.00000000 0.00000000
## Xcaudate_rvs_n_ant_z -0.01892928 0.02190619
## Xinterview_age   0.01521727 0.02213864
```

### 3.3 Model: CBCL internalizing factor ~ Putamen activity (anticipation stage)

#### Female participants

```
##
## Family: gaussian
## Link function: identity
##
## Formula:
## cbcl_scr_syn_internal_r ~ putamen_rvs_n_ant_z + interview_age
##
## Parametric coefficients:
##              Estimate Std. Error t value Pr(>|t|)
## (Intercept)   5.934388   1.857662   3.195 0.00142 **
## putamen_rvs_n_ant_z -0.095198   0.132427  -0.719 0.47230
## interview_age  -0.008957   0.015537  -0.577 0.56434
## ---
## Signif. codes:  0 '***' 0.001 '**' 0.01 '*' 0.05 '.' 0.1 ' ' 1
##
##
## R-sq.(adj) =  -0.000598
## lmer.REML = 12595  Scale est. = 11.211    n = 2041

##                stdcoef      stdse
## X(Intercept)    0.00000000 0.00000000
## Xputamen_rvs_n_ant_z -0.01538262 0.02139824
## Xinterview_age   -0.01242203 0.02154710
```

#### Male participants

```
##
## Family: gaussian
## Link function: identity
##
## Formula:
## cbcl_scr_syn_internal_r ~ putamen_rvs_n_ant_z + interview_age
##
## Parametric coefficients:
##              Estimate Std. Error t value Pr(>|t|)
## (Intercept)   3.35048    1.85734   1.804 0.0714 .
## putamen_rvs_n_ant_z -0.15563   0.12301  -1.265 0.2060
## interview_age   0.01181    0.01547   0.763 0.4453
## ---
## Signif. codes:  0 '***' 0.001 '**' 0.01 '*' 0.05 '.' 0.1 ' ' 1
##
##
## R-sq.(adj) =  -0.000471
## lmer.REML = 12647  Scale est. = 18.132    n = 2057
```

```
##                stdcoef      stdse
## X(Intercept)      0.00000000 0.00000000
## Xputamen_rvsn_ant_z -0.02763637 0.02184387
## Xinterview_age      0.01688681 0.02212169
```

### 3.4 Model: CBCL internalizing factor ~ Accumbens activity (feedback stage)

#### Female participants

```
##
## Family: gaussian
## Link function: identity
##
## Formula:
## cbcl_scr_syn_internal_r ~ accumbens_posvsneg_feedback_z + interview_age
##
## Parametric coefficients:
##                Estimate Std. Error t value Pr(>|t|)
## (Intercept)      5.830691   1.856144   3.141 0.00171 **
## accumbens_posvsneg_feedback_z -0.050476   0.176282  -0.286 0.77465
## interview_age     -0.008162   0.015527  -0.526 0.59916
## ---
## Signif. codes:  0 '***' 0.001 '**' 0.01 '*' 0.05 '.' 0.1 ' ' 1
##
##
## R-sq.(adj) =  -0.000578
## lmer.REML = 12646  Scale est. = 11.21    n = 2050

##                stdcoef      stdse
## X(Intercept)      0.00000000 0.00000000
## Xaccumbens_posvsneg_feedback_z -0.006103001 0.02131392
## Xinterview_age     -0.011313685 0.02152144
```

#### Male participants

```
##
## Family: gaussian
## Link function: identity
##
## Formula:
## cbcl_scr_syn_internal_r ~ accumbens_posvsneg_feedback_z + interview_age
##
## Parametric coefficients:
##                Estimate Std. Error t value Pr(>|t|)
## (Intercept)      3.20768    1.84860   1.735 0.0829 .
## accumbens_posvsneg_feedback_z 0.32112    0.16304   1.970 0.0490 *
## interview_age     0.01259    0.01539   0.818 0.4137
## ---
## Signif. codes:  0 '***' 0.001 '**' 0.01 '*' 0.05 '.' 0.1 ' ' 1
##
##
## R-sq.(adj) =  0.000399
## lmer.REML = 12603  Scale est. = 18.899    n = 2054
```

```
##
##               stdcoef      stdse
## X(Intercept)   0.00000000 0.00000000
## Xaccumbens_posvsneg_feedback_z 0.04319714 0.02193190
## Xinterview_age 0.01808956 0.02212641
```

### 3.5 Model: CBCL internalizing factor ~ Caudate activity (feedback stage)

#### Female participants

```
##
## Family: gaussian
## Link function: identity
##
## Formula:
## cbcl_scr_syn_internal_r ~ caudate_posvsneg_feedback_z + interview_age
##
## Parametric coefficients:
##               Estimate Std. Error t value Pr(>|t|)
## (Intercept)    6.08504   1.86838   3.257 0.00115 **
## caudate_posvsneg_feedback_z -0.18760   0.13267  -1.414 0.15750
## interview_age  -0.01029   0.01562  -0.659 0.51010
## ---
## Signif. codes:  0 '***' 0.001 '**' 0.01 '*' 0.05 '.' 0.1 ' ' 1
##
##
## R-sq.(adj) = 0.000878
## lmer.REML = 12610 Scale est. = 11.326 n = 2042
##
##               stdcoef      stdse
## X(Intercept)   0.00000000 0.00000000
## Xcaudate_posvsneg_feedback_z -0.02984372 0.02110522
## Xinterview_age -0.01421366 0.02157502
```

#### Male participants

```
##
## Family: gaussian
## Link function: identity
##
## Formula:
## cbcl_scr_syn_internal_r ~ caudate_posvsneg_feedback_z + interview_age
##
## Parametric coefficients:
##               Estimate Std. Error t value Pr(>|t|)
## (Intercept)    3.781203   1.865165   2.027 0.0428 *
## caudate_posvsneg_feedback_z 0.141738   0.131057   1.082 0.2796
## interview_age   0.008144   0.015537   0.524 0.6002
## ---
## Signif. codes:  0 '***' 0.001 '**' 0.01 '*' 0.05 '.' 0.1 ' ' 1
##
##
## R-sq.(adj) = -0.000857
## lmer.REML = 12670 Scale est. = 18.536 n = 2058
```

```
##
##               stdcoef      stdse
## X(Intercept)      0.00000000 0.00000000
## Xcaudate_posvsneg_feedback_z 0.02360106 0.02182246
## Xinterview_age    0.01159805 0.02212483
```

### 3.6 Model: CBCL internalizing factor ~ Putamen activity (feedback stage)

#### Female participants

```
##
## Family: gaussian
## Link function: identity
##
## Formula:
## cbcl_scr_syn_internal_r ~ putamen_posvsneg_feedback_z + interview_age
##
## Parametric coefficients:
##               Estimate Std. Error t value Pr(>|t|)
## (Intercept)      5.870302   1.864372   3.149 0.00166 **
## putamen_posvsneg_feedback_z -0.099433   0.139287  -0.714 0.47539
## interview_age    -0.008449   0.015591  -0.542 0.58795
## ---
## Signif. codes:  0 '***' 0.001 '**' 0.01 '*' 0.05 '.' 0.1 ' ' 1
##
##
## R-sq.(adj) = -0.000157
## lmer.REML = 12610 Scale est. = 11.281 n = 2042
##
##               stdcoef      stdse
## X(Intercept)      0.00000000 0.00000000
## Xputamen_posvsneg_feedback_z -0.01507505 0.02111722
## Xinterview_age    -0.01167656 0.02154777
```

#### Male participants

```
##
## Family: gaussian
## Link function: identity
##
## Formula:
## cbcl_scr_syn_internal_r ~ putamen_posvsneg_feedback_z + interview_age
##
## Parametric coefficients:
##               Estimate Std. Error t value Pr(>|t|)
## (Intercept)      3.54548   1.86842   1.898 0.0579 .
## putamen_posvsneg_feedback_z 0.13679   0.13284   1.030 0.3032
## interview_age    0.01013   0.01556   0.651 0.5149
## ---
## Signif. codes:  0 '***' 0.001 '**' 0.01 '*' 0.05 '.' 0.1 ' ' 1
##
##
## R-sq.(adj) = -0.00108
## lmer.REML = 12701 Scale est. = 18.877 n = 2061
```

```
##
##               stdcoef      stdse
## X(Intercept)    0.00000000 0.00000000
## Xputamen_posvsneg_feedback_z 0.02257279 0.02192055
## Xinterview_age  0.01439570 0.02210408
```

### 3.7 Model: CBCL internalizing factor ~ OFC activity (anticipation stage)

#### Female participants

```
##
## Family: gaussian
## Link function: identity
##
## Formula:
## cbcl_scr_syn_internal_r ~ lOFC_rvsn_ant_z + interview_age
##
## Parametric coefficients:
##               Estimate Std. Error t value Pr(>|t|)
## (Intercept)    5.886252  1.871858  3.145 0.00169 **
## lOFC_rvsn_ant_z 0.028463  0.202850  0.140 0.88843
## interview_age  -0.008492  0.015651 -0.543 0.58746
## ---
## Signif. codes:  0 '***' 0.001 '**' 0.01 '*' 0.05 '.' 0.1 ' ' 1
##
##
## R-sq.(adj) = -0.000729
## lmer.REML = 12589 Scale est. = 11.525 n = 2038
```

```
##               stdcoef      stdse
## X(Intercept)    0.00000000 0.00000000
## XlOFC_rvsn_ant_z 0.003020377 0.02152582
## Xinterview_age  -0.011738081 0.02163280
```

```
##
## Family: gaussian
## Link function: identity
##
## Formula:
## cbcl_scr_syn_internal_r ~ mOFC_rvsn_ant_z + interview_age
##
## Parametric coefficients:
##               Estimate Std. Error t value Pr(>|t|)
## (Intercept)    5.859094  1.868796  3.135 0.00174 **
## mOFC_rvsn_ant_z 0.158153  0.173166  0.913 0.36119
## interview_age  -0.008187  0.015629 -0.524 0.60045
## ---
## Signif. codes:  0 '***' 0.001 '**' 0.01 '*' 0.05 '.' 0.1 ' ' 1
##
##
## R-sq.(adj) = -0.000132
## lmer.REML = 12597 Scale est. = 11.352 n = 2039
```

```
##               stdcoef      stdse
```

```
## X(Intercept)      0.00000000 0.00000000
## XmOFC_rvsn_ant_z 0.01926434 0.02109318
## Xinterview_age   -0.01129104 0.02155432
```

### Male participants

```
##
## Family: gaussian
## Link function: identity
##
## Formula:
## cbcl_scr_syn_internal_r ~ lOFC_rvsn_ant_z + interview_age
##
## Parametric coefficients:
##           Estimate Std. Error t value Pr(>|t|)
## (Intercept)  2.59775    1.84642   1.407   0.160
## lOFC_rvsn_ant_z 0.01023    0.18646   0.055   0.956
## interview_age  0.01775    0.01538   1.155   0.248
##
##
## R-sq.(adj) = -0.000919
## lmer.REML = 12592 Scale est. = 18.062    n = 2053
```

```
##           stdcoef      stdse
## X(Intercept)  0.00000000 0.00000000
## XlOFC_rvsn_ant_z 0.001201186 0.02190392
## Xinterview_age  0.025574945 0.02215096
```

```
##
## Family: gaussian
## Link function: identity
##
## Formula:
## cbcl_scr_syn_internal_r ~ mOFC_rvsn_ant_z + interview_age
##
## Parametric coefficients:
##           Estimate Std. Error t value Pr(>|t|)
## (Intercept)  2.66849    1.85435   1.439   0.150
## mOFC_rvsn_ant_z 0.25414    0.17105   1.486   0.137
## interview_age  0.01724    0.01544   1.116   0.264
##
##
## R-sq.(adj) = 0.000328
## lmer.REML = 12576 Scale est. = 18.194    n = 2048
```

```
##           stdcoef      stdse
## X(Intercept)  0.00000000 0.00000000
## XmOFC_rvsn_ant_z 0.03252081 0.02188820
## Xinterview_age  0.02474006 0.02216395
```



### 3.8 Model: CBCL internalizing factor ~ OFC activity (feedback stage)

#### Female participants

```
##
## Family: gaussian
## Link function: identity
##
## Formula:
## cbcl_scr_syn_internal_r ~ lOFC_posvsneg_feedback_z + interview_age
##
## Parametric coefficients:
##              Estimate Std. Error t value Pr(>|t|)
## (Intercept)    5.888613   1.861224   3.164 0.00158 **
## lOFC_posvsneg_feedback_z -0.237566   0.228693  -1.039 0.29902
## interview_age  -0.008663   0.015572  -0.556 0.57803
## ---
## Signif. codes:  0 '***' 0.001 '**' 0.01 '*' 0.05 '.' 0.1 ' ' 1
##
##
## R-sq.(adj) = 4.13e-05
## lmer.REML = 12579 Scale est. = 11.213 n = 2039

##              stdcoef      stdse
## X(Intercept)      0.0000000 0.0000000
## XlOFC_posvsneg_feedback_z -0.02224531 0.02141444
## Xinterview_age     -0.01200652 0.02158089

##
## Family: gaussian
## Link function: identity
##
## Formula:
## cbcl_scr_syn_internal_r ~ mOFC_posvsneg_feedback_z + interview_age
##
## Parametric coefficients:
##              Estimate Std. Error t value Pr(>|t|)
## (Intercept)    5.973940   1.863262   3.206 0.00137 **
## mOFC_posvsneg_feedback_z -0.159334   0.188165  -0.847 0.39722
## interview_age  -0.009333   0.015591  -0.599 0.54951
## ---
## Signif. codes:  0 '***' 0.001 '**' 0.01 '*' 0.05 '.' 0.1 ' ' 1
##
##
## R-sq.(adj) = 0.000255
## lmer.REML = 12595 Scale est. = 11.397 n = 2040

##              stdcoef      stdse
## X(Intercept)      0.0000000 0.0000000
## XmOFC_posvsneg_feedback_z -0.01821223 0.02150767
## Xinterview_age     -0.01289717 0.02154552
```

## Male participants

```
##
## Family: gaussian
## Link function: identity
##
## Formula:
## cbcl_scr_syn_internal_r ~ l0FC_posvsneg_feedback_z + interview_age
##
## Parametric coefficients:
##              Estimate Std. Error t value Pr(>|t|)
## (Intercept)    3.13068    1.84350   1.698   0.0896 .
## l0FC_posvsneg_feedback_z  0.06848    0.20435   0.335   0.7376
## interview_age    0.01345    0.01535   0.876   0.3810
## ---
## Signif. codes:  0 '***' 0.001 '**' 0.01 '*' 0.05 '.' 0.1 ' ' 1
##
##
## R-sq.(adj) = -0.00105
## lmer.REML = 12663  Scale est. = 18.043    n = 2063

##              stdcoef      stdse
## X(Intercept)          0.00000000 0.00000000
## Xl0FC_posvsneg_feedback_z 0.007299579 0.02178333
## Xinterview_age         0.019366812 0.02210083

##
## Family: gaussian
## Link function: identity
##
## Formula:
## cbcl_scr_syn_internal_r ~ m0FC_posvsneg_feedback_z + interview_age
##
## Parametric coefficients:
##              Estimate Std. Error t value Pr(>|t|)
## (Intercept)    3.17570    1.84275   1.723   0.085 .
## m0FC_posvsneg_feedback_z  0.26532    0.17873   1.484   0.138
## interview_age    0.01304    0.01535   0.850   0.396
## ---
## Signif. codes:  0 '***' 0.001 '**' 0.01 '*' 0.05 '.' 0.1 ' ' 1
##
##
## R-sq.(adj) = -0.000177
## lmer.REML = 12652  Scale est. = 18.142    n = 2061

##              stdcoef      stdse
## X(Intercept)          0.00000000 0.00000000
## Xm0FC_posvsneg_feedback_z 0.03243102 0.02184718
## Xinterview_age         0.01875492 0.02207703
```

### 3.9 Model: CBCL internalizing factor ~ BIS-BAS-RR

#### Female participants

```
##
## Family: gaussian
## Link function: identity
##
## Formula:
## cbcl_scr_syn_internal_r ~ bisbas_ss_basm_rr + interview_age
##
## Parametric coefficients:
##           Estimate Std. Error t value Pr(>|t|)
## (Intercept)  4.576754  1.717826  2.664  0.00776 **
## bisbas_ss_basm_rr -0.070300  0.044419  -1.583  0.11362
## interview_age  0.008269  0.013933  0.593  0.55293
## ---
## Signif. codes:  0 '***' 0.001 '**' 0.01 '*' 0.05 '.' 0.1 ' ' 1
##
##
## R-sq.(adj) = -0.000292
## lmer.REML = 16721 Scale est. = 12.884 n = 2690

##           stdcoef      stdse
## X(Intercept)      0.00000000 0.00000000
## Xbisbas_ss_basm_rr -0.02987863 0.01887900
## Xinterview_age     0.01127390 0.01899736
```

#### Male participants

```
##
## Family: gaussian
## Link function: identity
##
## Formula:
## cbcl_scr_syn_internal_r ~ bisbas_ss_basm_rr + interview_age
##
## Parametric coefficients:
##           Estimate Std. Error t value Pr(>|t|)
## (Intercept)  3.60221  1.69192  2.129  0.0333 *
## bisbas_ss_basm_rr 0.01009  0.04429  0.228  0.8198
## interview_age  0.01112  0.01371  0.811  0.4176
## ---
## Signif. codes:  0 '***' 0.001 '**' 0.01 '*' 0.05 '.' 0.1 ' ' 1
##
##
## R-sq.(adj) = -0.000755
## lmer.REML = 18144 Scale est. = 16.373 n = 2907

##           stdcoef      stdse
## X(Intercept)      0.00000000 0.00000000
## Xbisbas_ss_basm_rr 0.004192092 0.01840355
## Xinterview_age     0.015062217 0.01857752
```

### 3.10 Model: CBCL internalizing factor ~ MID Reaction Time

#### Female participants

```
##
## Family: gaussian
## Link function: identity
##
## Formula:
## cbcl_scr_syn_internal_r ~ rt_diff_large_neutral_z + interview_age
##
## Parametric coefficients:
##           Estimate Std. Error t value Pr(>|t|)
## (Intercept)      6.34845    1.78964   3.547 0.000397 ***
## rt_diff_large_neutral_z  0.13672    0.12031   1.136 0.255921
## interview_age     -0.01246    0.01495  -0.833 0.404751
## ---
## Signif. codes:  0 '***' 0.001 '**' 0.01 '*' 0.05 '.' 0.1 ' ' 1
##
##
## R-sq.(adj) = -5.14e-06
## lmer.REML = 13581 Scale est. = 11.707    n = 2201

##           stdcoef      stdse
## X(Intercept)      0.0000000 0.0000000
## Xrt_diff_large_neutral_z  0.02353331 0.02070898
## Xinterview_age     -0.01731784 0.02078157

##
## Family: gaussian
## Link function: identity
##
## Formula:
## cbcl_scr_syn_internal_r ~ rt_diff_large_small_z + interview_age
##
## Parametric coefficients:
##           Estimate Std. Error t value Pr(>|t|)
## (Intercept)      6.25233    1.78792   3.497 0.00048 ***
## rt_diff_large_small_z -0.15739    0.11917  -1.321 0.18675
## interview_age     -0.01158    0.01493  -0.775 0.43813
## ---
## Signif. codes:  0 '***' 0.001 '**' 0.01 '*' 0.05 '.' 0.1 ' ' 1
##
##
## R-sq.(adj) = -0.000251
## lmer.REML = 13580 Scale est. = 11.639    n = 2201

##           stdcoef      stdse
## X(Intercept)      0.0000000 0.0000000
## Xrt_diff_large_small_z -0.02721487 0.02060706
## Xinterview_age     -0.01609858 0.02075907
```

## Male participants

```
##
## Family: gaussian
## Link function: identity
##
## Formula:
## cbcl_scr_syn_internal_r ~ rt_diff_large_neutral_z + interview_age
##
## Parametric coefficients:
##              Estimate Std. Error t value Pr(>|t|)
## (Intercept)    2.95337    1.77854   1.661  0.0969 .
## rt_diff_large_neutral_z  0.04500    0.12536   0.359  0.7197
## interview_age    0.01547    0.01482   1.044  0.2965
## ---
## Signif. codes:  0 '***' 0.001 '**' 0.01 '*' 0.05 '.' 0.1 ' ' 1
##
##
## R-sq.(adj) = -0.000758
## lmer.REML = 14182  Scale est. = 17.631    n = 2297

##              stdcoef      stdse
## X(Intercept)    0.00000000 0.00000000
## Xrt_diff_large_neutral_z 0.00742118 0.02067627
## Xinterview_age   0.02185601 0.02093084

##
## Family: gaussian
## Link function: identity
##
## Formula:
## cbcl_scr_syn_internal_r ~ rt_diff_large_small_z + interview_age
##
## Parametric coefficients:
##              Estimate Std. Error t value Pr(>|t|)
## (Intercept)    2.96179    1.77843   1.665  0.096 .
## rt_diff_large_small_z -0.07562    0.12322  -0.614  0.539
## interview_age    0.01540    0.01481   1.040  0.299
## ---
## Signif. codes:  0 '***' 0.001 '**' 0.01 '*' 0.05 '.' 0.1 ' ' 1
##
##
## R-sq.(adj) = -0.000672
## lmer.REML = 14181  Scale est. = 17.688    n = 2297

##              stdcoef      stdse
## X(Intercept)    0.00000000 0.00000000
## Xrt_diff_large_small_z -0.01266907 0.02064481
## Xinterview_age   0.02175852 0.02092903
```

## 4—Internalizing~Puberty x Reward—

### 4.1 Model: CBCL internalizing factor ~ PDS x Accumbens activity (anticipation stage)

#### Female participants

```
##
## Family: gaussian
## Link function: identity
##
## Formula:
## cbcl_scr_syn_internal_r ~ PDS_score * accumbens_rvsn_ant_z +
##   race.ethnicity.5level + demo_race_hispanic + interview_age
##
## Parametric coefficients:
##               Estimate Std. Error t value Pr(>|t|)
## (Intercept)    4.93246    2.07818   2.373 0.017717 *
## PDS_score       0.66789    0.17883   3.735 0.000193 ***
## accumbens_rvsn_ant_z -0.74666    0.42905  -1.740 0.081967 .
## race.ethnicity.5levelBlack  0.54545    0.89101   0.612 0.540495
## race.ethnicity.5levelMixed  2.34273    0.87490   2.678 0.007473 **
## race.ethnicity.5levelOther  2.34680    0.99199   2.366 0.018089 *
## race.ethnicity.5levelWhite  1.35252    0.82265   1.644 0.100314
## demo_race_hispanic1    0.49442    0.34785   1.421 0.155373
## interview_age    -0.02243    0.01629  -1.377 0.168697
## PDS_score:accumbens_rvsn_ant_z  0.42529    0.23874   1.781 0.074993 .
## ---
## Signif. codes:  0 '***' 0.001 '**' 0.01 '*' 0.05 '.' 0.1 ' ' 1
##
##
## R-sq.(adj) =  0.0145
## lmer.REML = 12315  Scale est. = 11.173    n = 1999

##               stdcoef      stdse
## X(Intercept)    0.00000000 0.00000000
## XPDS_score      0.08899043 0.02382796
## Xaccumbens_rvsn_ant_z -0.09396490 0.05399451
## Xrace.ethnicity.5levelBlack  0.03339004 0.05454371
## Xrace.ethnicity.5levelMixed  0.14413866 0.05382876
## Xrace.ethnicity.5levelOther  0.09479789 0.04007102
## Xrace.ethnicity.5levelWhite  0.11707848 0.07121143
## Xdemo_race_hispanic1    0.03675147 0.02585679
## Xinterview_age    -0.03088277 0.02242913
## XPDS_score:accumbens_rvsn_ant_z  0.09588237 0.05382300
```

#### Male participants

```
##
## Family: gaussian
## Link function: identity
##
```

```

## Formula:
## cbcl_scr_syn_internal_r ~ PDS_score * accumbens_rvsn_ant_z +
##   race.ethnicity.5level + demo_race_hispanic + interview_age
##
## Parametric coefficients:
##
##           Estimate Std. Error t value Pr(>|t|)
## (Intercept)      1.105143   2.013195   0.549  0.58310
## PDS_score         0.744167   0.231992   3.208  0.00136 **
## accumbens_rvsn_ant_z -0.182527   0.432717  -0.422  0.67321
## race.ethnicity.5levelBlack  1.141776   0.870109   1.312  0.18960
## race.ethnicity.5levelMixed  2.816734   0.860474   3.273  0.00108 **
## race.ethnicity.5levelOther  2.802547   0.990415   2.830  0.00471 **
## race.ethnicity.5levelWhite  2.105762   0.809086   2.603  0.00932 **
## demo_race_hispanic1    0.032827   0.334966   0.098  0.92194
## interview_age         0.004667   0.015736   0.297  0.76681
## PDS_score:accumbens_rvsn_ant_z 0.032985   0.298462   0.111  0.91201
## ---
## Signif. codes:  0 '***' 0.001 '**' 0.01 '*' 0.05 '.' 0.1 ' ' 1
##
##
## R-sq.(adj) =  0.01
## lmer.REML = 12349  Scale est. = 18.343   n = 2017

##
##           stdcoef      stdse
## X(Intercept)      0.00000000 0.00000000
## XPDS_score        0.075294613 0.02347290
## Xaccumbens_rvsn_ant_z -0.025438342 0.06030683
## Xrace.ethnicity.5levelBlack  0.071353141 0.05437581
## Xrace.ethnicity.5levelMixed  0.178180769 0.05443179
## Xrace.ethnicity.5levelOther  0.110302206 0.03898061
## Xrace.ethnicity.5levelWhite  0.186781241 0.07176600
## Xdemo_race_hispanic1    0.002517770 0.02569164
## Xinterview_age        0.006725127 0.02267481
## XPDS_score:accumbens_rvsn_ant_z 0.006671157 0.06036306

```

## 4.2 Model: CBCL internalizing factor ~ PDS x Caudate activity (anticipation stage)

### Female participants

```

##
## Family: gaussian
## Link function: identity
##
## Formula:
## cbcl_scr_syn_internal_r ~ PDS_score * caudate_rvsn_ant_z + race.ethnicity.5level +
##   demo_race_hispanic + interview_age
##
## Parametric coefficients:
##
##           Estimate Std. Error t value Pr(>|t|)
## (Intercept)      5.16482   2.08805   2.474 0.013462 *
## PDS_score         0.69019   0.17965   3.842 0.000126 ***
## caudate_rvsn_ant_z -0.11993   0.32559  -0.368 0.712651

```

```

## race.ethnicity.5levelBlack    0.54705    0.89316    0.612 0.540289
## race.ethnicity.5levelMixed    2.29666    0.87576    2.622 0.008796 **
## race.ethnicity.5levelOther    2.30580    0.99182    2.325 0.020181 *
## race.ethnicity.5levelWhite    1.32860    0.82400    1.612 0.107037
## demo_race_hispanic1          0.49035    0.34786    1.410 0.158803
## interview_age                 -0.02440    0.01638   -1.490 0.136466
## PDS_score:caudate_rvs_n_ant_z 0.05174    0.18124    0.285 0.775296
## ---
## Signif. codes:  0 '***' 0.001 '**' 0.01 '*' 0.05 '.' 0.1 ' ' 1
##
##
## R-sq.(adj) =  0.0131
## lmer.REML = 12316  Scale est. = 11.35    n = 1998

##                                stdcoef    stdse
## X(Intercept)                   0.00000000 0.00000000
## XPDS_score                      0.09168964 0.02386600
## Xcaudate_rvs_n_ant_z            -0.01968152 0.05343153
## Xrace.ethnicity.5levelBlack     0.03330435 0.05437603
## Xrace.ethnicity.5levelMixed     0.14172435 0.05404239
## Xrace.ethnicity.5levelOther     0.09311051 0.04005049
## Xrace.ethnicity.5levelWhite     0.11491193 0.07126832
## Xdemo_race_hispanic1            0.03640186 0.02582355
## Xinterview_age                  -0.03354718 0.02251966
## XPDS_score:caudate_rvs_n_ant_z 0.01524638 0.05340356

```

### Male participants

```

##
## Family: gaussian
## Link function: identity
##
## Formula:
## cbcl_scr_syn_internal_r ~ PDS_score * caudate_rvs_n_ant_z + race.ethnicity.5level +
##   demo_race_hispanic + interview_age
##
## Parametric coefficients:
##                                Estimate Std. Error t value Pr(>|t|)
## (Intercept)                   1.335424    2.020919    0.661 0.508816
## PDS_score                      0.766072    0.231952    3.303 0.000974 ***
## caudate_rvs_n_ant_z            0.282502    0.351648    0.803 0.421859
## race.ethnicity.5levelBlack     1.034625    0.889356    1.163 0.244829
## race.ethnicity.5levelMixed     2.698696    0.880718    3.064 0.002212 **
## race.ethnicity.5levelOther     2.779288    1.004888    2.766 0.005731 **
## race.ethnicity.5levelWhite     2.023427    0.830117    2.438 0.014875 *
## demo_race_hispanic1            0.055234    0.336414    0.164 0.869603
## interview_age                   0.003298    0.015749    0.209 0.834160
## PDS_score:caudate_rvs_n_ant_z -0.297277    0.244097   -1.218 0.223418
## ---
## Signif. codes:  0 '***' 0.001 '**' 0.01 '*' 0.05 '.' 0.1 ' ' 1
##
##
## R-sq.(adj) =  0.0104

```



```
## lmer.REML = 12338 Scale est. = 18.37 n = 2015
```

```
##                                stdcoef      stdse
## X(Intercept)                   0.00000000 0.00000000
## XPDS_score                     0.077470881 0.02345668
## Xcaudate_rvsn_ant_z            0.050628423 0.06302045
## Xrace.ethnicity.5levelBlack    0.064762432 0.05566931
## Xrace.ethnicity.5levelMixed    0.170105930 0.05551395
## Xrace.ethnicity.5levelOther    0.110541978 0.03996791
## Xrace.ethnicity.5levelWhite    0.179347856 0.07357803
## Xdemo_race_hispanic1          0.004223753 0.02572579
## Xinterview_age                 0.004747977 0.02267455
## XPDS_score:caudate_rvsn_ant_z -0.076813601 0.06307229
```

### 4.3 Model: CBCL internalizing factor ~ PDS x Putamen activity (anticipation stage)

#### Female participants

```
##
## Family: gaussian
## Link function: identity
##
## Formula:
## cbcl_scr_syn_internal_r ~ PDS_score * putamen_rvsn_ant_z + race.ethnicity.5level +
##   demo_race_hispanic + interview_age
##
## Parametric coefficients:
##              Estimate Std. Error t value Pr(>|t|)
## (Intercept)    4.97477    2.07632   2.396 0.016669 *
## PDS_score      0.69413    0.17949   3.867 0.000114 ***
## putamen_rvsn_ant_z -0.37583    0.32746  -1.148 0.251214
## race.ethnicity.5levelBlack  0.59070    0.88838   0.665 0.506182
## race.ethnicity.5levelMixed  2.32554    0.87167   2.668 0.007695 **
## race.ethnicity.5levelOther  2.29813    0.98931   2.323 0.020281 *
## race.ethnicity.5levelWhite  1.29941    0.81989   1.585 0.113158
## demo_race_hispanic1    0.50620    0.34697   1.459 0.144749
## interview_age    -0.02287    0.01628  -1.404 0.160369
## PDS_score:putamen_rvsn_ant_z 0.18597    0.18035   1.031 0.302586
## ---
## Signif. codes:  0 '***' 0.001 '**' 0.01 '*' 0.05 '.' 0.1 ' ' 1
##
##
## R-sq.(adj) = 0.014
## lmer.REML = 12281 Scale est. = 11.319 n = 1995
##
##                                stdcoef      stdse
## X(Intercept)                   0.00000000 0.00000000
## XPDS_score                     0.09255025 0.02393170
## Xputamen_rvsn_ant_z            -0.06021333 0.05246248
## Xrace.ethnicity.5levelBlack    0.03618439 0.05441955
## Xrace.ethnicity.5levelMixed    0.14390731 0.05394014
## Xrace.ethnicity.5levelOther    0.09322116 0.04013015
```

```
## Xrace.ethnicity.5levelWhite    0.11286005 0.07121149
## Xdemo_race_hispanic1          0.03777751 0.02589438
## Xinterview_age                 -0.03158244 0.02248890
## XPDS_score:putamen_rvsn_ant_z  0.05394806 0.05231720
```

#### Male participants

```
##
## Family: gaussian
## Link function: identity
##
## Formula:
## cbcl_scr_syn_internal_r ~ PDS_score * putamen_rvsn_ant_z + race.ethnicity.5level +
##   demo_race_hispanic + interview_age
##
## Parametric coefficients:
##              Estimate Std. Error t value Pr(>|t|)
## (Intercept)   1.097535   2.015001   0.545 0.586033
## PDS_score     0.793779   0.232575   3.413 0.000655 ***
## putamen_rvsn_ant_z 0.681711   0.349735   1.949 0.051408 .
## race.ethnicity.5levelBlack 1.111177   0.886597   1.253 0.210240
## race.ethnicity.5levelMixed 2.732572   0.875784   3.120 0.001833 **
## race.ethnicity.5levelOther 2.662829   1.004894   2.650 0.008116 **
## race.ethnicity.5levelWhite 2.059703   0.827160   2.490 0.012851 *
## demo_race_hispanic1 -0.001105   0.335942  -0.003 0.997377
## interview_age   0.004782   0.015710   0.304 0.760864
## PDS_score:putamen_rvsn_ant_z -0.637708   0.246660  -2.585 0.009797 **
## ---
## Signif. codes:  0 '***' 0.001 '**' 0.01 '*' 0.05 '.' 0.1 ' ' 1
##
##
## R-sq.(adj) =  0.0125
## lmer.REML = 12328  Scale est. = 17.583    n = 2016

##              stdcoef      stdse
## X(Intercept)   0.000000000 0.00000000
## XPDS_score     0.0799458470 0.02342394
## Xputamen_rvsn_ant_z 0.1218344044 0.06250409
## Xrace.ethnicity.5levelBlack 0.0694445332 0.05540909
## Xrace.ethnicity.5levelMixed 0.1740559719 0.05578460
## Xrace.ethnicity.5levelOther 0.1049969322 0.03962356
## Xrace.ethnicity.5levelWhite 0.1830151498 0.07349741
## Xdemo_race_hispanic1 -0.0000845667 0.02571651
## Xinterview_age  0.0068968450 0.02265804
## XPDS_score:putamen_rvsn_ant_z -0.1616275006 0.06251620
```

#### 4.4 Model: CBCL internalizing factor ~ PDS x Lateral OFC activity (anticipation stage)

##### Female participants

```
##
```

```

## Family: gaussian
## Link function: identity
##
## Formula:
## cbcl_scr_syn_internal_r ~ PDS_score * l0FC_rvsn_ant_z + race.ethnicity.5level +
##   demo_race_hispanic + interview_age
##
## Parametric coefficients:
##              Estimate Std. Error t value Pr(>|t|)
## (Intercept)    4.90115    2.09807   2.336 0.019589 *
## PDS_score      0.66515    0.17977   3.700 0.000222 ***
## l0FC_rvsn_ant_z 0.01527    0.52247   0.029 0.976689
## race.ethnicity.5levelBlack 0.52114    0.89989   0.579 0.562581
## race.ethnicity.5levelMixed 2.24412    0.88436   2.538 0.011239 *
## race.ethnicity.5levelOther 2.23647    1.00065   2.235 0.025527 *
## race.ethnicity.5levelWhite 1.24974    0.83231   1.502 0.133380
## demo_race_hispanic1 0.51354    0.34902   1.471 0.141342
## interview_age  -0.02142    0.01641  -1.305 0.192031
## PDS_score:l0FC_rvsn_ant_z 0.03931    0.28333   0.139 0.889677
## ---
## Signif. codes:  0 '***' 0.001 '**' 0.01 '*' 0.05 '.' 0.1 ' ' 1
##
##
## R-sq.(adj) =  0.0124
## lmer.REML = 12288  Scale est. = 11.562    n = 1994

##              stdcoef      stdse
## X(Intercept)    0.000000000 0.000000000
## XPDS_score      0.088727047 0.02398104
## Xl0FC_rvsn_ant_z 0.001601394 0.05479781
## Xrace.ethnicity.5levelBlack 0.031889966 0.05506718
## Xrace.ethnicity.5levelMixed 0.138259645 0.05448509
## Xrace.ethnicity.5levelOther 0.091050210 0.04073797
## Xrace.ethnicity.5levelWhite 0.108336858 0.07215133
## Xdemo_race_hispanic1 0.038283997 0.02601878
## Xinterview_age  -0.029496615 0.02260208
## XPDS_score:l0FC_rvsn_ant_z 0.007601278 0.05479157

```

## Male participants

```

##
## Family: gaussian
## Link function: identity
##
## Formula:
## cbcl_scr_syn_internal_r ~ PDS_score * l0FC_rvsn_ant_z + race.ethnicity.5level +
##   demo_race_hispanic + interview_age
##
## Parametric coefficients:
##              Estimate Std. Error t value Pr(>|t|)
## (Intercept)    0.43320    1.99732   0.217 0.82831
## PDS_score      0.65010    0.23340   2.785 0.00540 **
## l0FC_rvsn_ant_z -0.47040    0.51114  -0.920 0.35753

```

```

## race.ethnicity.5levelBlack  1.16389    0.86244    1.350  0.17732
## race.ethnicity.5levelMixed  2.77910    0.85230    3.261  0.00113 **
## race.ethnicity.5levelOther  2.81399    0.97983    2.872  0.00412 **
## race.ethnicity.5levelWhite  2.03614    0.80073    2.543  0.01107 *
## demo_race_hispanic1        -0.05505    0.33262   -0.166  0.86856
## interview_age                0.01162    0.01563    0.743  0.45750
## PDS_score:lOFC_rvsn_ant_z   0.33920    0.34826    0.974  0.33017
## ---
## Signif. codes:  0 '***' 0.001 '**' 0.01 '*' 0.05 '.' 0.1 ' ' 1
##
##
## R-sq.(adj) =  0.00873
## lmer.REML = 12290  Scale est. = 17.836    n = 2014

##                stdcoef    stdse
## X(Intercept)    0.000000000 0.000000000
## XPDS_score      0.065971761 0.02368487
## XlOFC_rvsn_ant_z -0.055571732 0.06038459
## Xrace.ethnicity.5levelBlack 0.072989147 0.05408490
## Xrace.ethnicity.5levelMixed 0.177068361 0.05430378
## Xrace.ethnicity.5levelOther 0.112541004 0.03918660
## Xrace.ethnicity.5levelWhite 0.182090163 0.07160877
## Xdemo_race_hispanic1 -0.004259226 0.02573431
## Xinterview_age   0.016891116 0.02273038
## XPDS_score:lOFC_rvsn_ant_z 0.058918560 0.06049135

```

#### 4.5 Model: CBCL internalizing factor ~ PDS x Medial OFC activity (anticipation stage)

##### Female participants

```

##
## Family: gaussian
## Link function: identity
##
## Formula:
## cbcl_scr_syn_internal_r ~ PDS_score * mOFC_rvsn_ant_z + race.ethnicity.5level +
##   demo_race_hispanic + interview_age
##
## Parametric coefficients:
##                Estimate Std. Error t value Pr(>|t|)
## (Intercept)    4.84149    2.09453    2.311 0.020908 *
## PDS_score      0.66802    0.17956    3.720 0.000204 ***
## mOFC_rvsn_ant_z -0.03687    0.43630   -0.085 0.932667
## race.ethnicity.5levelBlack 0.51760    0.90004    0.575 0.565296
## race.ethnicity.5levelMixed 2.25855    0.88469    2.553 0.010757 *
## race.ethnicity.5levelOther 2.31830    1.00294    2.312 0.020907 *
## race.ethnicity.5levelWhite 1.29551    0.83274    1.556 0.119937
## demo_race_hispanic1    0.49881    0.34895    1.429 0.153030
## interview_age   -0.02114    0.01638   -1.291 0.196961
## PDS_score:mOFC_rvsn_ant_z 0.13133    0.23937    0.549 0.583311
## ---
## Signif. codes:  0 '***' 0.001 '**' 0.01 '*' 0.05 '.' 0.1 ' ' 1

```

```
##
##
## R-sq.(adj) = 0.0134
## lmer.REML = 12296 Scale est. = 11.364 n = 1995
```

```
##                stdcoef      stdse
## X(Intercept)      0.00000000 0.00000000
## XPDS_score        0.088811347 0.02387143
## XmOFC_rvsn_ant_z -0.004478575 0.05300058
## Xrace.ethnicity.5levelBlack 0.031642800 0.05502242
## Xrace.ethnicity.5levelMixed 0.138775931 0.05435980
## Xrace.ethnicity.5levelOther 0.093688857 0.04053143
## Xrace.ethnicity.5levelWhite 0.112013216 0.07200151
## Xdemo_race_hispanic1 0.037053451 0.02592132
## Xinterview_age    -0.029046868 0.02250487
## XPDS_score:mOFC_rvsn_ant_z 0.029045655 0.05294075
```

### Male participants

```
##
## Family: gaussian
## Link function: identity
##
## Formula:
## cbcl_scr_syn_internal_r ~ PDS_score * mOFC_rvsn_ant_z + race.ethnicity.5level +
##   demo_race_hispanic + interview_age
##
```

```
## Parametric coefficients:
##                Estimate Std. Error t value Pr(>|t|)
## (Intercept)      0.622361  2.005242  0.310  0.75631
## PDS_score        0.686285  0.232818  2.948  0.00324 **
## mOFC_rvsn_ant_z  0.217975  0.462027  0.472  0.63713
## race.ethnicity.5levelBlack 1.086841  0.866342  1.255  0.20980
## race.ethnicity.5levelMixed 2.697266  0.855655  3.152  0.00164 **
## race.ethnicity.5levelOther 2.781770  0.980968  2.836  0.00462 **
## race.ethnicity.5levelWhite 2.016291  0.803861  2.508  0.01221 *
## demo_race_hispanic1 -0.014152  0.332878 -0.043  0.96609
## interview_age     0.009891  0.015680  0.631  0.52825
## PDS_score:mOFC_rvsn_ant_z 0.018780  0.301677  0.062  0.95037
## ---
## Signif. codes:  0 '***' 0.001 '**' 0.01 '*' 0.05 '.' 0.1 ' ' 1
```

```
## R-sq.(adj) = 0.0102
## lmer.REML = 12260 Scale est. = 18.013 n = 2007
```

```
##                stdcoef      stdse
## X(Intercept)      0.00000000 0.00000000
## XPDS_score        0.069700171 0.02364538
## XmOFC_rvsn_ant_z  0.028062735 0.05948261
## Xrace.ethnicity.5levelBlack 0.067640207 0.05391732
## Xrace.ethnicity.5levelMixed 0.171479098 0.05439839
## Xrace.ethnicity.5levelOther 0.111613818 0.03935968
```

```

## Xrace.ethnicity.5levelWhite 0.179665859 0.07162969
## Xdemo_race_hispanic1 -0.001093349 0.02571684
## Xinterview_age 0.014339695 0.02273278
## XPDS_score:mOFC_rvsn_ant_z 0.003714531 0.05966866

```

#### 4.6 Model: CBCL internalizing factor ~ PDS x Accumbens activity (feedback)

##### Female participants

```

##
## Family: gaussian
## Link function: identity
##
## Formula:
## cbcl_scr_syn_internal_r ~ PDS_score * accumbens_posvsneg_feedback_z +
##   race.ethnicity.5level + demo_race_hispanic + interview_age
##
## Parametric coefficients:
##
##           Estimate Std. Error t value Pr(>|t|)
## (Intercept)      4.86589    2.07602   2.344 0.01918
## PDS_score         0.68636    0.17813   3.853 0.00012
## accumbens_posvsneg_feedback_z -0.39320    0.44400  -0.886 0.37595
## race.ethnicity.5levelBlack      0.54437    0.88849   0.613 0.54015
## race.ethnicity.5levelMixed     2.21939    0.87236   2.544 0.01103
## race.ethnicity.5levelOther     2.36260    0.98666   2.395 0.01673
## race.ethnicity.5levelWhite     1.34627    0.82071   1.640 0.10108
## demo_race_hispanic1      0.42095    0.34808   1.209 0.22667
## interview_age      -0.02196    0.01627  -1.349 0.17744
## PDS_score:accumbens_posvsneg_feedback_z 0.20945    0.24541   0.853 0.39350
##
## (Intercept)      *
## PDS_score         ***
## accumbens_posvsneg_feedback_z
## race.ethnicity.5levelBlack
## race.ethnicity.5levelMixed      *
## race.ethnicity.5levelOther      *
## race.ethnicity.5levelWhite
## demo_race_hispanic1
## interview_age
## PDS_score:accumbens_posvsneg_feedback_z
## ---
## Signif. codes:  0 '***' 0.001 '**' 0.01 '*' 0.05 '.' 0.1 ' ' 1
##
##
## R-sq.(adj) = 0.0121
## lmer.REML = 12340 Scale est. = 11.244 n = 2005
##
##           stdcoef      stdse
## X(Intercept)      0.00000000 0.00000000
## XPDS_score        0.09184209 0.02383526
## Xaccumbens_posvsneg_feedback_z -0.04725519 0.05336031
## Xrace.ethnicity.5levelBlack      0.03353625 0.05473619
## Xrace.ethnicity.5levelMixed     0.13741419 0.05401235

```

```

## Xrace.ethnicity.5levelOther          0.09659968 0.04034147
## Xrace.ethnicity.5levelWhite          0.11721814 0.07145787
## Xdemo_race_hispanic1                 0.03133133 0.02590731
## Xinterview_age                       -0.03031982 0.02247321
## XPDS_score:accumbens_posvsneg_feedback_z 0.04536103 0.05314860

```

### Male participants

```

##
## Family: gaussian
## Link function: identity
##
## Formula:
## cbcl_scr_syn_internal_r ~ PDS_score * accumbens_posvsneg_feedback_z +
##   race.ethnicity.5level + demo_race_hispanic + interview_age
##
## Parametric coefficients:
##              Estimate Std. Error t value Pr(>|t|)
## (Intercept)   9.718e-01  1.998e+00   0.486 0.626804
## PDS_score      7.123e-01  2.299e-01   3.098 0.001972
## accumbens_posvsneg_feedback_z 1.674e-02  4.468e-01   0.037 0.970122
## race.ethnicity.5levelBlack 1.244e+00  8.632e-01   1.441 0.149834
## race.ethnicity.5levelMixed 2.849e+00  8.519e-01   3.344 0.000842
## race.ethnicity.5levelOther 2.956e+00  9.815e-01   3.012 0.002628
## race.ethnicity.5levelWhite 2.101e+00  8.012e-01   2.623 0.008790
## demo_race_hispanic1 7.092e-05  3.327e-01   0.000 0.999830
## interview_age 5.707e-03  1.562e-02   0.365 0.714890
## PDS_score:accumbens_posvsneg_feedback_z 2.356e-01  3.046e-01   0.774 0.439232
##
## (Intercept)
## PDS_score      **
## accumbens_posvsneg_feedback_z
## race.ethnicity.5levelBlack
## race.ethnicity.5levelMixed      ***
## race.ethnicity.5levelOther      **
## race.ethnicity.5levelWhite      **
## demo_race_hispanic1
## interview_age
## PDS_score:accumbens_posvsneg_feedback_z
## ---
## Signif. codes:  0 '***' 0.001 '**' 0.01 '*' 0.05 '.' 0.1 ' ' 1
##
##
## R-sq.(adj) = 0.0113
## lmer.REML = 12294 Scale est. = 18.671 n = 2014

##              stdcoef      stdse
## X(Intercept) 0.000000e+00 0.00000000
## XPDS_score   7.260536e-02 0.02343254
## Xaccumbens_posvsneg_feedback_z 2.270536e-03 0.06061325
## Xrace.ethnicity.5levelBlack 7.800362e-02 0.05414395
## Xrace.ethnicity.5levelMixed 1.815168e-01 0.05428687
## Xrace.ethnicity.5levelOther 1.174139e-01 0.03898166

```

```

## Xrace.ethnicity.5levelWhite          1.877074e-01 0.07157101
## Xdemo_race_hispanic1                 5.467682e-06 0.02565261
## Xinterview_age                        8.278766e-03 0.02265989
## XPDS_score:accumbens_posvsneg_feedback_z 4.694157e-02 0.06067585

```

#### 4.7 Model: CBCL internalizing factor ~ PDS x Caudate activity (feedback)

##### Female participants

```

##
## Family: gaussian
## Link function: identity
##
## Formula:
## cbcl_scr_syn_internal_r ~ PDS_score * caudate_posvsneg_feedback_z +
##   race.ethnicity.5level + demo_race_hispanic + interview_age
##
## Parametric coefficients:
##
##           Estimate Std. Error t value Pr(>|t|)
## (Intercept)      5.24064    2.08996   2.508  0.0122 *
## PDS_score         0.70970    0.17965   3.951 8.07e-05 ***
## caudate_posvsneg_feedback_z -0.42312    0.33771  -1.253  0.2104
## race.ethnicity.5levelBlack    0.54975    0.89324   0.615  0.5383
## race.ethnicity.5levelMixed    2.22349    0.87503   2.541  0.0111 *
## race.ethnicity.5levelOther    2.17874    0.99090   2.199  0.0280 *
## race.ethnicity.5levelWhite    1.27525    0.82348   1.549  0.1216
## demo_race_hispanic1    0.49242    0.34972   1.408  0.1593
## interview_age       -0.02506    0.01638  -1.530  0.1263
## PDS_score:caudate_posvsneg_feedback_z 0.15205    0.18800   0.809  0.4187
## ---
## Signif. codes:  0 '***' 0.001 '**' 0.01 '*' 0.05 '.' 0.1 ' ' 1
##
##
## R-sq.(adj) =  0.0138
## lmer.REML = 12303  Scale est. = 11.31    n = 1997

##
##           stdcoef      stdse
## X(Intercept)      0.00000000 0.00000000
## XPDS_score        0.09443322 0.02390384
## Xcaudate_posvsneg_feedback_z -0.06710132 0.05355554
## Xrace.ethnicity.5levelBlack    0.03356088 0.05453082
## Xrace.ethnicity.5levelMixed    0.13757834 0.05414223
## Xrace.ethnicity.5levelOther    0.08848400 0.04024316
## Xrace.ethnicity.5levelWhite    0.11053134 0.07137481
## Xdemo_race_hispanic1    0.03652502 0.02594028
## Xinterview_age       -0.03447507 0.02253990
## XPDS_score:caudate_posvsneg_feedback_z 0.04368556 0.05401517

```

##### Male participants

```

##
## Family: gaussian

```



```

## Link function: identity
##
## Formula:
## cbcl_scr_syn_internal_r ~ PDS_score * caudate_posvsneg_feedback_z +
##   race.ethnicity.5level + demo_race_hispanic + interview_age
##
## Parametric coefficients:
##
##           Estimate Std. Error t value Pr(>|t|)
## (Intercept)      1.660869   2.025202   0.820 0.412256
## PDS_score         0.796861   0.232639   3.425 0.000626 ***
## caudate_posvsneg_feedback_z -0.151916   0.356251  -0.426 0.669840
## race.ethnicity.5levelBlack    1.121802   0.878802   1.277 0.201922
## race.ethnicity.5levelMixed    2.796188   0.869009   3.218 0.001313 **
## race.ethnicity.5levelOther    2.892817   0.994158   2.910 0.003656 **
## race.ethnicity.5levelWhite    2.070243   0.818202   2.530 0.011475 *
## demo_race_hispanic1          0.069761   0.335517   0.208 0.835313
## interview_age        -0.000388   0.015764  -0.025 0.980366
## PDS_score:caudate_posvsneg_feedback_z 0.207350   0.238202   0.870 0.384142
## ---
## Signif. codes:  0 '***' 0.001 '**' 0.01 '*' 0.05 '.' 0.1 ' ' 1
##
##
## R-sq.(adj) =  0.0108
## lmer.REML = 12345  Scale est. = 18.427   n = 2016

##           stdcoef      stdse
## X(Intercept)      0.000000000 0.000000000
## XPDS_score        0.080420355 0.02347821
## Xcaudate_posvsneg_feedback_z -0.025476897 0.05974461
## Xrace.ethnicity.5levelBlack    0.070193320 0.05498835
## Xrace.ethnicity.5levelMixed    0.176489565 0.05485002
## Xrace.ethnicity.5levelOther    0.115012321 0.03952564
## Xrace.ethnicity.5levelWhite    0.183604445 0.07256417
## Xdemo_race_hispanic1          0.005342790 0.02569638
## Xinterview_age        -0.000557737 0.02266052
## XPDS_score:caudate_posvsneg_feedback_z 0.052004275 0.05974202

```

#### 4.8 Model: CBCL internalizing factor ~ PDS x Putamen activity (feedback)

##### Female participants

```

##
## Family: gaussian
## Link function: identity
##
## Formula:
## cbcl_scr_syn_internal_r ~ PDS_score * putamen_posvsneg_feedback_z +
##   race.ethnicity.5level + demo_race_hispanic + interview_age
##
## Parametric coefficients:
##
##           Estimate Std. Error t value Pr(>|t|)
## (Intercept)      4.86580   2.08450   2.334 0.019680 *
## PDS_score         0.67167   0.17939   3.744 0.000186 ***

```

```

## putamen_posvsneg_feedback_z          0.04503    0.35173    0.128 0.898143
## race.ethnicity.5levelBlack           0.63545    0.89359    0.711 0.477091
## race.ethnicity.5levelMixed           2.29627    0.87490    2.625 0.008742 **
## race.ethnicity.5levelOther           2.27889    0.99332    2.294 0.021882 *
## race.ethnicity.5levelWhite           1.32205    0.82379    1.605 0.108689
## demo_race_hispanic1                  0.51174    0.34948    1.464 0.143267
## interview_age                         -0.02187    0.01634   -1.338 0.181011
## PDS_score:putamen_posvsneg_feedback_z -0.08259    0.19310   -0.428 0.668914
## ---
## Signif. codes:  0 '***' 0.001 '**' 0.01 '*' 0.05 '.' 0.1 ' ' 1
##
##
## R-sq.(adj) =  0.0131
## lmer.REML = 12299  Scale est. = 11.345    n = 1996

##                                stdcoef      stdse
## X(Intercept)                   0.00000000 0.00000000
## XPDS_score                      0.08956683 0.02392100
## Xputamen_posvsneg_feedback_z    0.00678795 0.05302087
## Xrace.ethnicity.5levelBlack     0.03880078 0.05456262
## Xrace.ethnicity.5levelMixed     0.14234404 0.05423465
## Xrace.ethnicity.5levelOther     0.09170833 0.03997370
## Xrace.ethnicity.5levelWhite     0.11455641 0.07138204
## Xdemo_race_hispanic1            0.03792995 0.02590293
## Xinterview_age                  -0.03010194 0.02249573
## XPDS_score:putamen_posvsneg_feedback_z -0.02279752 0.05330223

```

## Male participants

```

##
## Family: gaussian
## Link function: identity
##
## Formula:
## cbcl_scr_syn_internal_r ~ PDS_score * putamen_posvsneg_feedback_z +
##   race.ethnicity.5level + demo_race_hispanic + interview_age
##
## Parametric coefficients:
##                                Estimate Std. Error t value Pr(>|t|)
## (Intercept)                   1.360166   2.020508   0.673 0.500910
## PDS_score                      0.762492   0.232428   3.281 0.001054 **
## putamen_posvsneg_feedback_z   -0.309543   0.362742  -0.853 0.393572
## race.ethnicity.5levelBlack     1.160402   0.872609   1.330 0.183733
## race.ethnicity.5levelMixed     2.857744   0.862177   3.315 0.000934 ***
## race.ethnicity.5levelOther     2.924746   0.990420   2.953 0.003183 **
## race.ethnicity.5levelWhite     2.152726   0.811334   2.653 0.008033 **
## demo_race_hispanic1            0.006837   0.337189   0.020 0.983825
## interview_age                  0.002033   0.015773   0.129 0.897473
## PDS_score:putamen_posvsneg_feedback_z 0.332882   0.244131   1.364 0.172866
## ---
## Signif. codes:  0 '***' 0.001 '**' 0.01 '*' 0.05 '.' 0.1 ' ' 1
##
##

```

```

## R-sq.(adj) = 0.0108
## lmer.REML = 12387 Scale est. = 18.667 n = 2021

##                stdcoef      stdse
## X(Intercept)      0.000000000 0.00000000
## XPDS_score        0.0768104463 0.02341388
## Xputamen_posvsneg_feedback_z -0.0515747401 0.06043866
## Xrace.ethnicity.5levelBlack 0.0723038142 0.05437164
## Xrace.ethnicity.5levelMixed 0.1799263971 0.05428355
## Xrace.ethnicity.5levelOther 0.1157805167 0.03920727
## Xrace.ethnicity.5levelWhite 0.1903577875 0.07174331
## Xdemo_race_hispanic1 0.0005209947 0.02569557
## Xinterview_age    0.0029171056 0.02263603
## XPDS_score:putamen_posvsneg_feedback_z 0.0823487608 0.06039344

```

#### 4.9 Model: CBCL internalizing factor ~ PDS x Lateral OFC activity (feedback stage)

##### Female participants

```

##
## Family: gaussian
## Link function: identity
##
## Formula:
## cbcl_scr_syn_internal_r ~ PDS_score * lOFC_posvsneg_feedback_z +
##   race.ethnicity.5level + demo_race_hispanic + interview_age
##
## Parametric coefficients:
##                Estimate Std. Error t value Pr(>|t|)
## (Intercept)      4.92052    2.08082   2.365 0.018140 *
## PDS_score         0.68518    0.17862   3.836 0.000129 ***
## lOFC_posvsneg_feedback_z -0.67670    0.57385  -1.179 0.238452
## race.ethnicity.5levelBlack 0.54472    0.88932   0.613 0.540267
## race.ethnicity.5levelMixed 2.21866    0.87231   2.543 0.011052 *
## race.ethnicity.5levelOther 2.47787    0.99339   2.494 0.012699 *
## race.ethnicity.5levelWhite 1.30039    0.82024   1.585 0.113041
## demo_race_hispanic1 0.41769    0.34743   1.202 0.229419
## interview_age    -0.02219    0.01632  -1.360 0.173911
## PDS_score:lOFC_posvsneg_feedback_z 0.26950    0.31121   0.866 0.386604
## ---
## Signif. codes:  0 '***' 0.001 '**' 0.01 '*' 0.05 '.' 0.1 ' ' 1
##
##
## R-sq.(adj) = 0.0134
## lmer.REML = 12272 Scale est. = 11.19 n = 1994

##                stdcoef      stdse
## X(Intercept)      0.000000000 0.00000000
## XPDS_score        0.09169905 0.02390497
## XlOFC_posvsneg_feedback_z -0.06300960 0.05343331
## Xrace.ethnicity.5levelBlack 0.03338588 0.05450613
## Xrace.ethnicity.5levelMixed 0.13713763 0.05391830

```

```

## Xrace.ethnicity.5levelOther      0.09961996 0.03993810
## Xrace.ethnicity.5levelWhite      0.11286173 0.07118942
## Xdemo_race_hispanic1             0.03110200 0.02587032
## Xinterview_age                   -0.03063505 0.02252191
## XPDS_score:lOFC_posvsneg_feedback_z 0.04618863 0.05333658

```

### Male participants

```

##
## Family: gaussian
## Link function: identity
##
## Formula:
## cbcl_scr_syn_internal_r ~ PDS_score * lOFC_posvsneg_feedback_z +
##   race.ethnicity.5level + demo_race_hispanic + interview_age
##
## Parametric coefficients:
##
##               Estimate Std. Error t value Pr(>|t|)
## (Intercept)    0.979028   1.996429   0.490 0.623912
## PDS_score      0.708560   0.231559   3.060 0.002243 **
## lOFC_posvsneg_feedback_z -0.261914   0.565936  -0.463 0.643560
## race.ethnicity.5levelBlack  1.172783   0.864706   1.356 0.175163
## race.ethnicity.5levelMixed  2.822926   0.853873   3.306 0.000963 ***
## race.ethnicity.5levelOther  2.744911   0.984921   2.787 0.005371 **
## race.ethnicity.5levelWhite  2.056512   0.803007   2.561 0.010509 *
## demo_race_hispanic1 -0.003833   0.333298  -0.011 0.990826
## interview_age    0.006351   0.015611   0.407 0.684169
## PDS_score:lOFC_posvsneg_feedback_z 0.220286   0.383386   0.575 0.565639
## ---
## Signif. codes:  0 '***' 0.001 '**' 0.01 '*' 0.05 '.' 0.1 ' ' 1
##
##
## R-sq.(adj) =  0.00927
## lmer.REML = 12349  Scale est. = 17.93    n = 2022
##
##               stdcoef      stdse
## X(Intercept)    0.00000000 0.00000000
## XPDS_score      0.072016982 0.02353526
## XlOFC_posvsneg_feedback_z -0.027977210 0.06045240
## Xrace.ethnicity.5levelBlack  0.073335943 0.05407142
## Xrace.ethnicity.5levelMixed  0.179947249 0.05443009
## Xrace.ethnicity.5levelOther  0.108667074 0.03899162
## Xrace.ethnicity.5levelWhite  0.183412227 0.07161702
## Xdemo_race_hispanic1 -0.000295504 0.02569613
## Xinterview_age    0.009221725 0.02266674
## XPDS_score:lOFC_posvsneg_feedback_z 0.034719661 0.06042611

```

## 4.10 Model: CBCL internalizing factor ~ PDS x Medial OFC activity (feedback stage)

### Female participants

```
##
```

```

## Family: gaussian
## Link function: identity
##
## Formula:
## cbcl_scr_syn_internal_r ~ PDS_score * mOFC_posvsneg_feedback_z +
##   race.ethnicity.5level + demo_race_hispanic + interview_age
##
## Parametric coefficients:
##
##           Estimate Std. Error t value Pr(>|t|)
## (Intercept)      5.04965    2.08298   2.424 0.01543 *
## PDS_score         0.68950    0.17888   3.855 0.00012 ***
## mOFC_posvsneg_feedback_z
## -0.69715    0.48406  -1.440 0.14996
## race.ethnicity.5levelBlack
## 0.53721    0.89106   0.603 0.54665
## race.ethnicity.5levelMixed
## 2.19349    0.87432   2.509 0.01219 *
## race.ethnicity.5levelOther
## 2.30312    0.98997   2.326 0.02009 *
## race.ethnicity.5levelWhite
## 1.28148    0.82167   1.560 0.11901
## demo_race_hispanic1
## 0.46194    0.34777   1.328 0.18423
## interview_age
## -0.02318    0.01634  -1.419 0.15610
## PDS_score:mOFC_posvsneg_feedback_z
## 0.30275    0.26566   1.140 0.25459
## ---
## Signif. codes:  0 '***' 0.001 '**' 0.01 '*' 0.05 '.' 0.1 ' ' 1
##
##
## R-sq.(adj) =  0.0142
## lmer.REML = 12281  Scale est. = 11.435    n = 1994

##           stdcoef      stdse
## X(Intercept)      0.00000000 0.00000000
## XPDS_score        0.09205752 0.02388247
## XmOFC_posvsneg_feedback_z
## -0.07972625 0.05535673
## Xrace.ethnicity.5levelBlack
## 0.03274690 0.05431612
## Xrace.ethnicity.5levelMixed
## 0.13531019 0.05393443
## Xrace.ethnicity.5levelOther
## 0.09372436 0.04028628
## Xrace.ethnicity.5levelWhite
## 0.11104141 0.07119834
## Xdemo_race_hispanic1
## 0.03439118 0.02589090
## Xinterview_age
## -0.03189948 0.02248257
## XPDS_score:mOFC_posvsneg_feedback_z
## 0.06357237 0.05578438

```

## Male participants

```

##
## Family: gaussian
## Link function: identity
##
## Formula:
## cbcl_scr_syn_internal_r ~ PDS_score * mOFC_posvsneg_feedback_z +
##   race.ethnicity.5level + demo_race_hispanic + interview_age
##
## Parametric coefficients:
##
##           Estimate Std. Error t value Pr(>|t|)
## (Intercept)      1.034110    1.995537   0.518 0.604368
## PDS_score         0.710784    0.231505   3.070 0.002167 **
## mOFC_posvsneg_feedback_z
## -0.063667    0.507003  -0.126 0.900081

```

```

## race.ethnicity.5levelBlack      1.166348    0.864096    1.350 0.177235
## race.ethnicity.5levelMixed      2.840113    0.853678    3.327 0.000894 ***
## race.ethnicity.5levelOther      2.804023    0.982024    2.855 0.004343 **
## race.ethnicity.5levelWhite      2.063742    0.802717    2.571 0.010213 *
## demo_race_hispanic1             -0.021981    0.332877   -0.066 0.947358
## interview_age                    0.005773    0.015597    0.370 0.711295
## PDS_score:m0FC_posvsneg_feedback_z 0.249767    0.350278    0.713 0.475896
## ---
## Signif. codes:  0 '***' 0.001 '**' 0.01 '*' 0.05 '.' 0.1 ' ' 1
##
##
## R-sq.(adj) =  0.0109
## lmer.REML = 12337  Scale est. = 18.041    n = 2020

##                stdcoef      stdse
## X(Intercept)      0.00000000 0.00000000
## XPDS_score        0.072171105 0.02350639
## Xm0FC_posvsneg_feedback_z -0.007832675 0.06237454
## Xrace.ethnicity.5levelBlack 0.073046046 0.05411659
## Xrace.ethnicity.5levelMixed 0.180997361 0.05440397
## Xrace.ethnicity.5levelOther 0.111577504 0.03907663
## Xrace.ethnicity.5levelWhite 0.184144957 0.07162534
## Xdemo_race_hispanic1 -0.001694137 0.02565583
## Xinterview_age     0.008376781 0.02262955
## XPDS_score:m0FC_posvsneg_feedback_z 0.044479181 0.06237857

```

#### 4.11 Model: CBCL internalizing factor ~ PDS x BIS-BAS

##### Female participants

```

##
## Family: gaussian
## Link function: identity
##
## Formula:
## cbcl_scr_syn_internal_r ~ PDS_score * bisbas_ss_basm_rr + race.ethnicity.5level +
##   demo_race_hispanic + interview_age
##
## Parametric coefficients:
##                Estimate Std. Error t value Pr(>|t|)
## (Intercept)      2.191763    2.099766    1.044 0.29667
## PDS_score        1.574106    0.551603    2.854 0.00436 **
## bisbas_ss_basm_rr 0.114562    0.111110    1.031 0.30260
## race.ethnicity.5levelBlack 0.201260    0.791776    0.254 0.79937
## race.ethnicity.5levelMixed 1.868473    0.787599    2.372 0.01775 *
## race.ethnicity.5levelOther 2.513910    0.901229    2.789 0.00532 **
## race.ethnicity.5levelWhite 1.340999    0.740403    1.811 0.07023 .
## demo_race_hispanic1 0.164739    0.316995    0.520 0.60332
## interview_age     -0.004925    0.014590   -0.338 0.73572
## PDS_score:bisbas_ss_basm_rr -0.107740    0.059762   -1.803 0.07153 .
## ---
## Signif. codes:  0 '***' 0.001 '**' 0.01 '*' 0.05 '.' 0.1 ' ' 1
##

```

```
##
## R-sq.(adj) = 0.0132
## lmer.REML = 16324 Scale est. = 13.08 n = 2629
```

```
##
##          stdcoef      stdse
## X(Intercept)      0.00000000 0.00000000
## XPDS_score        0.209729583 0.07349406
## Xbisbas_ss_basm_rr 0.048498991 0.04703765
## Xrace.ethnicity.5levelBlack 0.013141938 0.05170153
## Xrace.ethnicity.5levelMixed 0.113552923 0.04786484
## Xrace.ethnicity.5levelOther 0.096398587 0.03455859
## Xrace.ethnicity.5levelWhite 0.116005473 0.06404984
## Xdemo_race_hispanic1 0.011826552 0.02275701
## Xinterview_age     -0.006689046 0.01981553
## XPDS_score:bisbas_ss_basm_rr -0.156103576 0.08658904
```

### Male participants

```
##
## Family: gaussian
## Link function: identity
##
## Formula:
## cbcl_scr_syn_internal_r ~ PDS_score * bisbas_ss_basm_rr + race.ethnicity.5level +
##   demo_race_hispanic + interview_age
##
## Parametric coefficients:
##          Estimate Std. Error t value Pr(>|t|)
## (Intercept)      4.7006846  2.0841176   2.255 0.02418 *
## PDS_score        -0.8611461  0.7896629  -1.091 0.27558
## bisbas_ss_basm_rr -0.2500233  0.1188474  -2.104 0.03549 *
## race.ethnicity.5levelBlack  1.2630721  0.7537979   1.676 0.09392 .
## race.ethnicity.5levelMixed  1.9863925  0.7541973   2.634 0.00849 **
## race.ethnicity.5levelOther  1.8142217  0.8610122   2.107 0.03520 *
## race.ethnicity.5levelWhite  1.4422989  0.7072059   2.039 0.04150 *
## demo_race_hispanic1  0.2546559  0.3010106   0.846 0.39762
## interview_age     -0.0005912  0.0140177  -0.042 0.96636
## PDS_score:bisbas_ss_basm_rr  0.1848411  0.0826208   2.237 0.02535 *
## ---
## Signif. codes:  0 '***' 0.001 '**' 0.01 '*' 0.05 '.' 0.1 ' ' 1
##
##
## R-sq.(adj) = 0.00836
## lmer.REML = 17683 Scale est. = 16.106 n = 2841
```

```
##
##          stdcoef      stdse
## X(Intercept)      0.000000000 0.00000000
## XPDS_score        -0.0855145875 0.07841607
## Xbisbas_ss_basm_rr -0.1047253177 0.04978071
## Xrace.ethnicity.5levelBlack  0.0810395185 0.04836416
## Xrace.ethnicity.5levelMixed  0.1179860170 0.04479715
## Xrace.ethnicity.5levelOther  0.0709229131 0.03365933
## Xrace.ethnicity.5levelWhite  0.1240563284 0.06082884
```

```
## Xdemo_race_hispanic1      0.0183849765 0.02173157
## Xinterview_age            -0.0008048901 0.01908485
## XPDS_score:bisbas_ss_basm_rr 0.2076296018 0.09280685
```

## 4.12 Model: CBCL internalizing factor ~ PDS x MID reaction time (large reward vs. neutral)

### Female participants

```
##
## Family: gaussian
## Link function: identity
##
## Formula:
## cbcl_scr_syn_internal_r ~ PDS_score * rt_diff_large_neutral_z +
##   race.ethnicity.5level + demo_race_hispanic + interview_age
##
## Parametric coefficients:
##
##               Estimate Std. Error t value Pr(>|t|)
## (Intercept)      5.501431   1.992806   2.761 0.00582 **
## PDS_score         0.641948   0.172915   3.713 0.00021 ***
## rt_diff_large_neutral_z
##   0.154591   0.311300   0.497 0.61952
## race.ethnicity.5levelBlack
##   0.560716   0.845384   0.663 0.50723
## race.ethnicity.5levelMixed
##   2.155255   0.833294   2.586 0.00976 **
## race.ethnicity.5levelOther
##   2.598824   0.947143   2.744 0.00612 **
## race.ethnicity.5levelWhite
##   1.320738   0.781113   1.691 0.09101 .
## demo_race_hispanic1
##   0.456433   0.341115   1.338 0.18102
## interview_age
##   -0.026474   0.015690  -1.687 0.09170 .
## PDS_score:rt_diff_large_neutral_z
##   -0.008308   0.171353  -0.048 0.96133
## ---
## Signif. codes:  0 '***' 0.001 '**' 0.01 '*' 0.05 '.' 0.1 ' ' 1
##
##
## R-sq.(adj) = 0.0132
## lmer.REML = 13258  Scale est. = 11.823  n = 2153
##
##               stdcoef      stdse
## X(Intercept)      0.000000000 0.000000000
## XPDS_score        0.085432620 0.02301209
## Xrt_diff_large_neutral_z
##   0.026457754 0.05327813
## Xrace.ethnicity.5levelBlack
##   0.035027385 0.05281032
## Xrace.ethnicity.5levelMixed
##   0.131975792 0.05102624
## Xrace.ethnicity.5levelOther
##   0.104261170 0.03799806
## Xrace.ethnicity.5levelWhite
##   0.114828644 0.06791216
## Xdemo_race_hispanic1
##   0.033597952 0.02510939
## Xinterview_age
##   -0.036666351 0.02173111
## XPDS_score:rt_diff_large_neutral_z
##   -0.002595203 0.05352500
```

### Male participants

```
##
## Family: gaussian
```



```

## Link function: identity
##
## Formula:
## cbcl_scr_syn_internal_r ~ PDS_score * rt_diff_large_neutral_z +
##   race.ethnicity.5level + demo_race_hispanic + interview_age
##
## Parametric coefficients:
##
##           Estimate Std. Error t value Pr(>|t|)
## (Intercept)      1.468491   1.936596   0.758 0.44836
## PDS_score         0.622357   0.221670   2.808 0.00503 **
## rt_diff_large_neutral_z
## 0.615672   0.346277   1.778 0.07554 .
## race.ethnicity.5levelBlack
## 0.747830   0.844881   0.885 0.37618
## race.ethnicity.5levelMixed
## 2.159276   0.837486   2.578 0.00999 **
## race.ethnicity.5levelOther
## 1.993475   0.961808   2.073 0.03832 *
## race.ethnicity.5levelWhite
## 1.472352   0.790394   1.863 0.06262 .
## demo_race_hispanic1
## 0.097591   0.322937   0.302 0.76253
## interview_age
## 0.008204   0.015067   0.544 0.58618
## PDS_score:rt_diff_large_neutral_z
## -0.391427   0.240096  -1.630 0.10318
## ---
## Signif. codes:  0 '***' 0.001 '**' 0.01 '*' 0.05 '.' 0.1 ' ' 1
##
##
## R-sq.(adj) = 0.00718
## lmer.REML = 13840 Scale est. = 17.748   n = 2251

##           stdcoef      stdse
## X(Intercept)      0.00000000 0.00000000
## XPDS_score        0.062424145 0.02223409
## Xrt_diff_large_neutral_z
## 0.102340818 0.05756040
## Xrace.ethnicity.5levelBlack
## 0.047305062 0.05344412
## Xrace.ethnicity.5levelMixed
## 0.136588098 0.05297635
## Xrace.ethnicity.5levelOther
## 0.078885051 0.03806030
## Xrace.ethnicity.5levelWhite
## 0.130288521 0.06994200
## Xdemo_race_hispanic1
## 0.007341529 0.02429389
## Xinterview_age
## 0.011689322 0.02146953
## XPDS_score:rt_diff_large_neutral_z
## -0.093733703 0.05749496

```

#### 4.13 Model: CBCL internalizing factor ~ PDS x MID reaction time (large vs. small reward)

##### Female participants

```

##
## Family: gaussian
## Link function: identity
##
## Formula:
## cbcl_scr_syn_internal_r ~ PDS_score * rt_diff_large_small_z +
##   race.ethnicity.5level + demo_race_hispanic + interview_age
##
## Parametric coefficients:
##
##           Estimate Std. Error t value Pr(>|t|)
## (Intercept)      5.41837   1.99084   2.722 0.006548 **

```

```

## PDS_score          0.62952    0.17249    3.650 0.000269 ***
## rt_diff_large_small_z  -0.54788    0.29956   -1.829 0.067547 .
## race.ethnicity.5levelBlack  0.56487    0.84371    0.670 0.503246
## race.ethnicity.5levelMixed  2.14230    0.83251    2.573 0.010140 *
## race.ethnicity.5levelOther  2.55705    0.94673    2.701 0.006969 **
## race.ethnicity.5levelWhite  1.29990    0.78025    1.666 0.095859 .
## demo_race_hispanic1    0.45983    0.34088    1.349 0.177498
## interview_age         -0.02539    0.01567   -1.621 0.105253
## PDS_score:rt_diff_large_small_z  0.25827    0.16476    1.568 0.117134
## ---
## Signif. codes:  0 '***' 0.001 '**' 0.01 '*' 0.05 '.' 0.1 ' ' 1
##
##
## R-sq.(adj) =  0.0143
## lmer.REML = 13256  Scale est. = 11.79    n = 2153

##                stdcoef      stdse
## X(Intercept)    0.0000000 0.0000000
## XPDS_score      0.08377894 0.02295527
## Xrt_diff_large_small_z -0.09440033 0.05161478
## Xrace.ethnicity.5levelBlack  0.03528668 0.05270563
## Xrace.ethnicity.5levelMixed  0.13118268 0.05097799
## Xrace.ethnicity.5levelOther  0.10258523 0.03798156
## Xrace.ethnicity.5levelWhite  0.11301707 0.06783728
## Xdemo_race_hispanic1    0.03384796 0.02509224
## Xinterview_age      -0.03516595 0.02169951
## XPDS_score:rt_diff_large_small_z  0.08112913 0.05175544

```

## Male participants

```

##
## Family: gaussian
## Link function: identity
##
## Formula:
## cbcl_scr_syn_internal_r ~ PDS_score * rt_diff_large_small_z +
##   race.ethnicity.5level + demo_race_hispanic + interview_age
##
## Parametric coefficients:
##                Estimate Std. Error t value Pr(>|t|)
## (Intercept)    1.495433  1.937391  0.772  0.44027
## PDS_score      0.625956  0.221517  2.826  0.00476 **
## rt_diff_large_small_z  0.112502  0.346367  0.325  0.74536
## race.ethnicity.5levelBlack  0.702795  0.844996  0.832  0.40566
## race.ethnicity.5levelMixed  2.106456  0.837600  2.515  0.01198 *
## race.ethnicity.5levelOther  1.868262  0.960621  1.945  0.05192 .
## race.ethnicity.5levelWhite  1.410928  0.790353  1.785  0.07437 .
## demo_race_hispanic1    0.094464  0.323247  0.292  0.77013
## interview_age      0.008503  0.015075  0.564  0.57278
## PDS_score:rt_diff_large_small_z -0.142787  0.241824 -0.590  0.55494
## ---
## Signif. codes:  0 '***' 0.001 '**' 0.01 '*' 0.05 '.' 0.1 ' ' 1
##

```

```

##
## R-sq.(adj) = 0.00581
## lmer.REML = 13842 Scale est. = 17.609 n = 2251

##               stdcoef      stdse
## X(Intercept)  0.00000000 0.00000000
## XPDS_score    0.062785201 0.02221882
## Xrt_diff_large_small_z 0.018914894 0.05823430
## Xrace.ethnicity.5levelBlack 0.044456297 0.05345140
## Xrace.ethnicity.5levelMixed 0.133246850 0.05298360
## Xrace.ethnicity.5levelOther 0.073930194 0.03801336
## Xrace.ethnicity.5levelWhite 0.124853059 0.06993836
## Xdemo_race_hispanic1 0.007106301 0.02431718
## Xinterview_age 0.012115652 0.02148020
## XPDS_score:rt_diff_large_small_z -0.034405634 0.05826948

```

#### 4.14 Model: CBCL internalizing factor ~ Testosterone x Accumbens activity (anticipation stage) + PDS

##### Female participants

```

##
## Family: gaussian
## Link function: identity
##
## Formula:
## cbcl_scr_syn_internal_r ~ PDS_score + hormone_scr_ert_mean *
##   accumbens_rvsnt_ant_z + race.ethnicity.5level + demo_race_hispanic +
##   interview_age
##
## Parametric coefficients:
##               Estimate Std. Error t value Pr(>|t|)
## (Intercept)    4.460740  2.119085  2.105 0.035422
## PDS_score       0.665395  0.191155  3.481 0.000511
## hormone_scr_ert_mean 0.002798  0.008101  0.345 0.729815
## accumbens_rvsnt_ant_z 0.182512  0.418879  0.436 0.663094
## race.ethnicity.5levelBlack 0.220171  0.899271  0.245 0.806613
## race.ethnicity.5levelMixed 2.173556  0.878765  2.473 0.013471
## race.ethnicity.5levelOther 2.237816  0.998934  2.240 0.025195
## race.ethnicity.5levelWhite 1.325853  0.823882  1.609 0.107726
## demo_race_hispanic1 0.355402  0.358674  0.991 0.321874
## interview_age   -0.018447  0.016899 -1.092 0.275143
## hormone_scr_ert_mean:accumbens_rvsnt_ant_z -0.006376  0.011134 -0.573 0.566914
##
## (Intercept)    *
## PDS_score      ***
## hormone_scr_ert_mean
## accumbens_rvsnt_ant_z
## race.ethnicity.5levelBlack
## race.ethnicity.5levelMixed  *
## race.ethnicity.5levelOther  *
## race.ethnicity.5levelWhite
## demo_race_hispanic1

```

```

## interview_age
## hormone_scr_ert_mean:accumbens_rvsn_ant_z
## ---
## Signif. codes:  0 '***' 0.001 '**' 0.01 '*' 0.05 '.' 0.1 ' ' 1
##
##
## R-sq.(adj) =  0.0115
## lmer.REML = 11518  Scale est. = 10.565    n = 1870

##
##                stdcoef      stdse
## X(Intercept)      0.00000000 0.00000000
## XPDS_score        0.088048832 0.02529474
## Xhormone_scr_ert_mean
## Xaccumbens_rvsn_ant_z
## Xrace.ethnicity.5levelBlack
## Xrace.ethnicity.5levelMixed
## Xrace.ethnicity.5levelOther
## Xrace.ethnicity.5levelWhite
## Xdemo_race_hispanic1
## Xinterview_age    -0.025633451 0.02348207
## Xhormone_scr_ert_mean:accumbens_rvsn_ant_z -0.030085404 0.05253210

```

### Male participants

```

##
## Family: gaussian
## Link function: identity
##
## Formula:
## cbcl_scr_syn_internal_r ~ PDS_score + hormone_scr_ert_mean *
##   accumbens_rvsn_ant_z + race.ethnicity.5level + demo_race_hispanic +
##   interview_age
##
## Parametric coefficients:
##
##                Estimate Std. Error t value Pr(>|t|)
## (Intercept)      0.826356   2.106340   0.392  0.69487
## PDS_score         0.807336   0.248609   3.247  0.00119
## hormone_scr_ert_mean
## accumbens_rvsn_ant_z
## race.ethnicity.5levelBlack
## race.ethnicity.5levelMixed
## race.ethnicity.5levelOther
## race.ethnicity.5levelWhite
## demo_race_hispanic1
## interview_age    0.007195   0.016674   0.431  0.66618
## hormone_scr_ert_mean:accumbens_rvsn_ant_z 0.003889   0.010802   0.360  0.71890
##
## (Intercept)
## PDS_score          **
## hormone_scr_ert_mean
## accumbens_rvsn_ant_z
## race.ethnicity.5levelBlack
## race.ethnicity.5levelMixed          **

```

```

## race.ethnicity.5levelOther          **
## race.ethnicity.5levelWhite          *
## demo_race_hispanic1
## interview_age
## hormone_scr_ert_mean:accumbens_rvsn_ant_z
## ---
## Signif. codes:  0 '***' 0.001 '**' 0.01 '*' 0.05 '.' 0.1 ' ' 1
##
##
## R-sq.(adj) =  0.00997
## lmer.REML = 11479  Scale est. = 18.675    n = 1866

##                               stdcoef      stdse
## X(Intercept)                   0.00000000 0.00000000
## XPDS_score                       0.080086034 0.02466148
## Xhormone_scr_ert_mean            -0.004656018 0.02414640
## Xaccumbens_rvsn_ant_z           -0.031496666 0.05053762
## Xrace.ethnicity.5levelBlack      0.061964362 0.05600285
## Xrace.ethnicity.5levelMixed      0.174432269 0.05665535
## Xrace.ethnicity.5levelOther      0.107339563 0.04071859
## Xrace.ethnicity.5levelWhite      0.181614492 0.07435632
## Xdemo_race_hispanic1             0.007153489 0.02645243
## Xinterview_age                   0.010256443 0.02377085
## Xhormone_scr_ert_mean:accumbens_rvsn_ant_z 0.018217382 0.05060633

```

#### 4.15 Model: CBCL internalizing factor ~ Testosterone x Caudate activity (anticipation stage) + PDS

##### Female participants

```

##
## Family: gaussian
## Link function: identity
##
## Formula:
## cbcl_scr_syn_internal_r ~ PDS_score + hormone_scr_ert_mean *
##   caudate_rvsn_ant_z + race.ethnicity.5level + demo_race_hispanic +
##   interview_age
##
## Parametric coefficients:
##                               Estimate Std. Error t value Pr(>|t|)
## (Intercept)                   4.5348882  2.1219447   2.137 0.032717
## PDS_score                       0.6845890  0.1914868   3.575 0.000359
## hormone_scr_ert_mean            0.0028676  0.0081083   0.354 0.723629
## caudate_rvsn_ant_z             -0.0035717  0.3299659  -0.011 0.991365
## race.ethnicity.5levelBlack      0.2633481  0.8995029   0.293 0.769730
## race.ethnicity.5levelMixed      2.1525889  0.8777123   2.452 0.014278
## race.ethnicity.5levelOther      2.2184539  0.9953510   2.229 0.025945
## race.ethnicity.5levelWhite      1.3332409  0.8235547   1.619 0.105642
## demo_race_hispanic1             0.3429821  0.3576367   0.959 0.337672
## interview_age                   -0.0193397  0.0169371  -1.142 0.253662
## hormone_scr_ert_mean:caudate_rvsn_ant_z 0.0001989  0.0087533   0.023 0.981875
##

```

```

## (Intercept) *
## PDS_score ***
## hormone_scr_ert_mean
## caudate_rvsn_ant_z
## race.ethnicity.5levelBlack
## race.ethnicity.5levelMixed *
## race.ethnicity.5levelOther *
## race.ethnicity.5levelWhite
## demo_race_hispanic1
## interview_age
## hormone_scr_ert_mean:caudate_rvsn_ant_z
## ---
## Signif. codes:  0 '***' 0.001 '**' 0.01 '*' 0.05 '.' 0.1 ' ' 1
##
##
## R-sq.(adj) =  0.0113
## lmer.REML = 11506  Scale est. = 10.618    n = 1868

```

|                                             | stdcoef       | stdse      |
|---------------------------------------------|---------------|------------|
| ## X(Intercept)                             | 0.0000000000  | 0.00000000 |
| ## XPDS_score                               | 0.0904617420  | 0.02530311 |
| ## Xhormone_scr_ert_mean                    | 0.0085822122  | 0.02426639 |
| ## Xcaudate_rvsn_ant_z                      | -0.0005902608 | 0.05453016 |
| ## Xrace.ethnicity.5levelBlack              | 0.0156609707  | 0.05349228 |
| ## Xrace.ethnicity.5levelMixed              | 0.1348256129  | 0.05497478 |
| ## Xrace.ethnicity.5levelOther              | 0.0916153870  | 0.04110496 |
| ## Xrace.ethnicity.5levelWhite              | 0.1157573234  | 0.07150432 |
| ## Xdemo_race_hispanic1                     | 0.0255479878  | 0.02663958 |
| ## Xinterview_age                           | -0.0268625946 | 0.02352540 |
| ## Xhormone_scr_ert_mean:caudate_rvsn_ant_z | 0.0012411632  | 0.05462655 |

## Male participants

```

##
## Family: gaussian
## Link function: identity
##
## Formula:
## cbcl_scr_syn_internal_r ~ PDS_score + hormone_scr_ert_mean *
##   caudate_rvsn_ant_z + race.ethnicity.5level + demo_race_hispanic +
##   interview_age
##
## Parametric coefficients:
##
## Estimate Std. Error t value Pr(>|t|)
## (Intercept) 1.090318 2.116933 0.515 0.606582
## PDS_score 0.820521 0.248605 3.300 0.000983
## hormone_scr_ert_mean -0.001400 0.008342 -0.168 0.866760
## caudate_rvsn_ant_z 0.207941 0.288077 0.722 0.470495
## race.ethnicity.5levelBlack 0.905254 0.938982 0.964 0.335132
## race.ethnicity.5levelMixed 2.714709 0.924768 2.936 0.003371
## race.ethnicity.5levelOther 2.652355 1.053709 2.517 0.011914
## race.ethnicity.5levelWhite 1.977938 0.872654 2.267 0.023531
## demo_race_hispanic1 0.094266 0.349284 0.270 0.787280

```

```

## interview_age                0.005727    0.016720    0.343 0.732003
## hormone_scr_ert_mean:caudate_rvsn_ant_z -0.009114    0.008086   -1.127 0.259871
##
## (Intercept)
## PDS_score                    ***
## hormone_scr_ert_mean
## caudate_rvsn_ant_z
## race.ethnicity.5levelBlack
## race.ethnicity.5levelMixed    **
## race.ethnicity.5levelOther    *
## race.ethnicity.5levelWhite    *
## demo_race_hispanic1
## interview_age
## hormone_scr_ert_mean:caudate_rvsn_ant_z
## ---
## Signif. codes:  0 '***' 0.001 '**' 0.01 '*' 0.05 '.' 0.1 ' ' 1
##
##
## R-sq.(adj) =  0.0103
## lmer.REML = 11473  Scale est. = 18.944    n = 1864

##                                stdcoef    stdse
## X(Intercept)                   0.000000000 0.000000000
## XPDS_score                      0.081249074 0.02461724
## Xhormone_scr_ert_mean            -0.004063508 0.02421654
## Xcaudate_rvsn_ant_z              0.037011233 0.05127471
## Xrace.ethnicity.5levelBlack      0.055283898 0.05734370
## Xrace.ethnicity.5levelMixed      0.169939493 0.05789003
## Xrace.ethnicity.5levelOther      0.104735783 0.04160869
## Xrace.ethnicity.5levelWhite      0.173000734 0.07632682
## Xdemo_race_hispanic1             0.007145795 0.02647729
## Xinterview_age                   0.008150815 0.02379699
## Xhormone_scr_ert_mean:caudate_rvsn_ant_z -0.057746001 0.05123680

```

#### 4.16 Model: CBCL internalizing factor ~ Testosterone x Putamen activity (anticipation stage) + PDS

##### Female participants

```

##
## Family: gaussian
## Link function: identity
##
## Formula:
## cbcl_scr_syn_internal_r ~ PDS_score + hormone_scr_ert_mean *
##   putamen_rvsn_ant_z + race.ethnicity.5level + demo_race_hispanic +
##   interview_age
##
## Parametric coefficients:
##                                Estimate Std. Error t value Pr(>|t|)
## (Intercept)                   4.341820   2.117114   2.051 0.040425
## PDS_score                      0.685162   0.191490   3.578 0.000355
## hormone_scr_ert_mean           0.001752   0.008077   0.217 0.828324

```

```

## putamen_rvsn_ant_z          -0.194659   0.331833  -0.587 0.557532
## race.ethnicity.5levelBlack  0.318982   0.895454   0.356 0.721714
## race.ethnicity.5levelMixed  2.189852   0.874549   2.504 0.012366
## race.ethnicity.5levelOther  2.243043   0.994948   2.254 0.024285
## race.ethnicity.5levelWhite  1.316069   0.820336   1.604 0.108817
## demo_race_hispanic1        0.361351   0.357142   1.012 0.311772
## interview_age              -0.017509   0.016893  -1.036 0.300127
## hormone_scr_ert_mean:putamen_rvsn_ant_z 0.004550   0.008692   0.523 0.600715
##
## (Intercept)                *
## PDS_score                   ***
## hormone_scr_ert_mean
## putamen_rvsn_ant_z
## race.ethnicity.5levelBlack
## race.ethnicity.5levelMixed  *
## race.ethnicity.5levelOther  *
## race.ethnicity.5levelWhite
## demo_race_hispanic1
## interview_age
## hormone_scr_ert_mean:putamen_rvsn_ant_z
## ---
## Signif. codes:  0 '***' 0.001 '**' 0.01 '*' 0.05 '.' 0.1 ' ' 1
##
##
## R-sq.(adj) =  0.0114
## lmer.REML = 11482  Scale est. = 10.569   n = 1866

##                stdcoef      stdse
## X(Intercept)    0.000000000 0.000000000
## XPDS_score      0.090800903 0.02537719
## Xhormone_scr_ert_mean 0.005262216 0.02426301
## Xputamen_rvsn_ant_z -0.031273105 0.05331090
## Xrace.ethnicity.5levelBlack 0.019075586 0.05354945
## Xrace.ethnicity.5levelMixed 0.137414357 0.05487842
## Xrace.ethnicity.5levelOther 0.092518827 0.04103862
## Xrace.ethnicity.5levelWhite 0.114607647 0.07143754
## Xdemo_race_hispanic1 0.027011425 0.02669677
## Xinterview_age    -0.024416110 0.02355743
## Xhormone_scr_ert_mean:putamen_rvsn_ant_z 0.027821247 0.05314857

```

## Male participants

```

##
## Family: gaussian
## Link function: identity
##
## Formula:
## cbcl_scr_syn_internal_r ~ PDS_score + hormone_scr_ert_mean *
##   putamen_rvsn_ant_z + race.ethnicity.5level + demo_race_hispanic +
##   interview_age
##
## Parametric coefficients:
##
##                Estimate Std. Error t value Pr(>|t|)

```



```

## (Intercept)                0.950507    2.111716    0.450 0.652683
## PDS_score                   0.835710    0.249503    3.349 0.000826
## hormone_scr_ert_mean       -0.001234    0.008330   -0.148 0.882222
## putamen_rvsn_ant_z         0.358346    0.285470    1.255 0.209533
## race.ethnicity.5levelBlack  0.938358    0.937376    1.001 0.316935
## race.ethnicity.5levelMixed  2.714538    0.920851    2.948 0.003240
## race.ethnicity.5levelOther  2.456016    1.055552    2.327 0.020085
## race.ethnicity.5levelWhite  1.963689    0.870617    2.256 0.024217
## demo_race_hispanic1        0.055634    0.348600    0.160 0.873220
## interview_age               0.006910    0.016685    0.414 0.678820
## hormone_scr_ert_mean:putamen_rvsn_ant_z -0.014910    0.007825   -1.906 0.056869
##
## (Intercept)
## PDS_score                    ***
## hormone_scr_ert_mean
## putamen_rvsn_ant_z
## race.ethnicity.5levelBlack
## race.ethnicity.5levelMixed    **
## race.ethnicity.5levelOther    *
## race.ethnicity.5levelWhite    *
## demo_race_hispanic1
## interview_age
## hormone_scr_ert_mean:putamen_rvsn_ant_z .
## ---
## Signif. codes:  0 '***' 0.001 '**' 0.01 '*' 0.05 '.' 0.1 ' ' 1
##
##
## R-sq.(adj) =  0.0113
## lmer.REML = 11461  Scale est. = 18.242    n = 1864

##                stdcoef    stdse
## X(Intercept)    0.000000000 0.000000000
## XPDS_score      0.082371181 0.02459214
## Xhormone_scr_ert_mean -0.003584990 0.02419450
## Xputamen_rvsn_ant_z  0.063156589 0.05031251
## Xrace.ethnicity.5levelBlack  0.057199532 0.05713969
## Xrace.ethnicity.5levelMixed  0.171840499 0.05829332
## Xrace.ethnicity.5levelOther  0.096091091 0.04129823
## Xrace.ethnicity.5levelWhite  0.172199089 0.07634584
## Xdemo_race_hispanic1  0.004221928 0.02645460
## Xinterview_age    0.009853074 0.02379169
## Xhormone_scr_ert_mean:putamen_rvsn_ant_z -0.095896161 0.05032583

```

#### 4.17 Model: CBCL internalizing factor ~ Testosterone x Accumbens activity (feedback stage) + PDS

Female participants

```

##
## Family: gaussian
## Link function: identity
##
## Formula:

```

```

## cbcl_scr_syn_internal_r ~ PDS_score + hormone_scr_ert_mean *
##   accumbens_posvsneg_feedback_z + race.ethnicity.5level + demo_race_hispanic +
##   interview_age
##
## Parametric coefficients:
##
##               Estimate Std. Error t value
## (Intercept)      4.189255   2.110672   1.985
## PDS_score         0.677795   0.190161   3.564
## hormone_scr_ert_mean 0.002331   0.008078   0.289
## accumbens_posvsneg_feedback_z 0.319909   0.465170   0.688
## race.ethnicity.5levelBlack 0.284555   0.894195   0.318
## race.ethnicity.5levelMixed 2.101703   0.874015   2.405
## race.ethnicity.5levelOther 2.296337   0.991434   2.316
## race.ethnicity.5levelWhite 1.361645   0.820086   1.660
## demo_race_hispanic1 0.271252   0.357796   0.758
## interview_age    -0.016437   0.016839  -0.976
## hormone_scr_ert_mean:accumbens_posvsneg_feedback_z -0.010360   0.012227  -0.847
##
##               Pr(>|t|)
## (Intercept)      0.047314 *
## PDS_score         0.000374 ***
## hormone_scr_ert_mean 0.772937
## accumbens_posvsneg_feedback_z 0.491712
## race.ethnicity.5levelBlack 0.750350
## race.ethnicity.5levelMixed 0.016285 *
## race.ethnicity.5levelOther 0.020657 *
## race.ethnicity.5levelWhite 0.097009 .
## demo_race_hispanic1 0.448475
## interview_age     0.329146
## hormone_scr_ert_mean:accumbens_posvsneg_feedback_z 0.396926
## ---
## Signif. codes:  0 '***' 0.001 '**' 0.01 '*' 0.05 '.' 0.1 ' ' 1
##
##
## R-sq.(adj) =  0.0107
## lmer.REML = 11518  Scale est. = 10.473   n = 1873
##
##               stdcoef      stdse
## X(Intercept)      0.000000000 0.000000000
## XPDS_score        0.090167889 0.02529740
## Xhormone_scr_ert_mean 0.006997497 0.02424821
## Xaccumbens_posvsneg_feedback_z 0.037588859 0.05465681
## Xrace.ethnicity.5levelBlack 0.017149749 0.05389191
## Xrace.ethnicity.5levelMixed 0.132108077 0.05493854
## Xrace.ethnicity.5levelOther 0.095615174 0.04128145
## Xrace.ethnicity.5levelWhite 0.118997652 0.07166940
## Xdemo_race_hispanic1 0.020239798 0.02669737
## Xinterview_age    -0.022931083 0.02349276
## Xhormone_scr_ert_mean:accumbens_posvsneg_feedback_z -0.046304621 0.05464837

```

## Male participants

```

##
## Family: gaussian

```

```

## Link function: identity
##
## Formula:
## cbcl_scr_syn_internal_r ~ PDS_score + hormone_scr_ert_mean *
##   accumbens_posvsneg_feedback_z + race.ethnicity.5level + demo_race_hispanic +
##   interview_age
##
## Parametric coefficients:
##
##               Estimate Std. Error t value
## (Intercept)      0.658559   2.091251   0.315
## PDS_score         0.769057   0.246289   3.123
## hormone_scr_ert_mean -0.002729   0.008376  -0.326
## accumbens_posvsneg_feedback_z 0.304347   0.375976   0.809
## race.ethnicity.5levelBlack 1.124960   0.909945   1.236
## race.ethnicity.5levelMixed 2.837777   0.892904   3.178
## race.ethnicity.5levelOther 2.905780   1.025407   2.834
## race.ethnicity.5levelWhite 2.089149   0.840017   2.487
## demo_race_hispanic1 0.063400   0.345254   0.184
## interview_age     0.008688   0.016568   0.524
## hormone_scr_ert_mean:accumbens_posvsneg_feedback_z 0.001418   0.010581   0.134
##
##               Pr(>|t|)
## (Intercept)      0.75286
## PDS_score         0.00182 **
## hormone_scr_ert_mean 0.74457
## accumbens_posvsneg_feedback_z 0.41834
## race.ethnicity.5levelBlack 0.21651
## race.ethnicity.5levelMixed 0.00151 **
## race.ethnicity.5levelOther 0.00465 **
## race.ethnicity.5levelWhite 0.01297 *
## demo_race_hispanic1 0.85432
## interview_age     0.60006
## hormone_scr_ert_mean:accumbens_posvsneg_feedback_z 0.89337
## ---
## Signif. codes:  0 '***' 0.001 '**' 0.01 '*' 0.05 '.' 0.1 ' ' 1
##
##
## R-sq.(adj) = 0.0114
## lmer.REML = 11419  Scale est. = 19.181  n = 1862
##
##               stdcoef      stdse
## X(Intercept)      0.000000000 0.000000000
## XPDS_score        0.076885588 0.02462248
## Xhormone_scr_ert_mean -0.007995204 0.02453590
## Xaccumbens_posvsneg_feedback_z 0.041184918 0.05087796
## Xrace.ethnicity.5levelBlack 0.068884609 0.05571865
## Xrace.ethnicity.5levelMixed 0.179539583 0.05649196
## Xrace.ethnicity.5levelOther 0.115321880 0.04069538
## Xrace.ethnicity.5levelWhite 0.184381166 0.07413704
## Xdemo_race_hispanic1 0.004856984 0.02644958
## Xinterview_age     0.012474363 0.02378765
## Xhormone_scr_ert_mean:accumbens_posvsneg_feedback_z 0.006843802 0.05105107

```

#### 4.18 Model: CBCL internalizing factor ~ Testosterone x Caudate activity (Feedback stage) + PDS

Female participants

```
##
## Family: gaussian
## Link function: identity
##
## Formula:
## cbcl_scr_syn_internal_r ~ PDS_score + hormone_scr_ert_mean *
##   caudate_posvsneg_feedback_z + race.ethnicity.5level + demo_race_hispanic +
##   interview_age
##
## Parametric coefficients:
##
##               Estimate Std. Error t value
## (Intercept)    4.554e+00  2.125e+00   2.143
## PDS_score       7.006e-01  1.917e-01   3.656
## hormone_scr_ert_mean  2.420e-03  8.112e-03   0.298
## caudate_posvsneg_feedback_z -1.997e-01  3.265e-01  -0.612
## race.ethnicity.5levelBlack  2.948e-01  8.991e-01   0.328
## race.ethnicity.5levelMixed  2.101e+00  8.768e-01   2.396
## race.ethnicity.5levelOther  2.103e+00  9.960e-01   2.112
## race.ethnicity.5levelWhite  1.291e+00  8.229e-01   1.569
## demo_race_hispanic1  3.428e-01  3.598e-01   0.953
## interview_age -1.950e-02  1.697e-02  -1.149
## hormone_scr_ert_mean:caudate_posvsneg_feedback_z -8.056e-06  8.468e-03  -0.001
##
##               Pr(>|t|)
## (Intercept)    0.032269 *
## PDS_score       0.000264 ***
## hormone_scr_ert_mean  0.765486
## caudate_posvsneg_feedback_z  0.540722
## race.ethnicity.5levelBlack  0.743000
## race.ethnicity.5levelMixed  0.016683 *
## race.ethnicity.5levelOther  0.034831 *
## race.ethnicity.5levelWhite  0.116767
## demo_race_hispanic1  0.340801
## interview_age    0.250598
## hormone_scr_ert_mean:caudate_posvsneg_feedback_z  0.999241
## ---
## Signif. codes:  0 '***' 0.001 '**' 0.01 '*' 0.05 '.' 0.1 ' ' 1
##
##
## R-sq.(adj) =  0.0122
## lmer.REML = 11483  Scale est. = 10.562    n = 1865
##
##               stdcoef      stdse
## X(Intercept)    0.000000e+00  0.00000000
## XPDS_score      9.263388e-02  0.02534069
## Xhormone_scr_ert_mean  7.251566e-03  0.02430729
## Xcaudate_posvsneg_feedback_z -3.193048e-02  0.05218801
## Xrace.ethnicity.5levelBlack  1.758754e-02  0.05363161
## Xrace.ethnicity.5levelMixed  1.319344e-01  0.05506927
## Xrace.ethnicity.5levelOther  8.696694e-02  0.04117999
```

```

## Xrace.ethnicity.5levelWhite          1.122973e-01 0.07156246
## Xdemo_race_hispanic1                 2.548609e-02 0.02674784
## Xinterview_age                       -2.709446e-02 0.02357562
## Xhormone_scr_ert_mean:caudate_posvsneg_feedback_z -4.981198e-05 0.05235506

```

### Male participants

```

##
## Family: gaussian
## Link function: identity
##
## Formula:
## cbcl_scr_syn_internal_r ~ PDS_score + hormone_scr_ert_mean *
##   caudate_posvsneg_feedback_z + race.ethnicity.5level + demo_race_hispanic +
##   interview_age
##
## Parametric coefficients:
##
##               Estimate Std. Error t value
## (Intercept)    1.3883336  2.1190745   0.655
## PDS_score       0.8436839  0.2489426   3.389
## hormone_scr_ert_mean -0.0004785  0.0083682  -0.057
## caudate_posvsneg_feedback_z 0.0385882  0.3254904   0.119
## race.ethnicity.5levelBlack 1.0010979  0.9272429   1.080
## race.ethnicity.5levelMixed 2.7672791  0.9117289   3.035
## race.ethnicity.5levelOther 2.7627825  1.0407302   2.655
## race.ethnicity.5levelWhite 2.0558581  0.8586835   2.394
## demo_race_hispanic1 0.1363458  0.3485672   0.391
## interview_age    0.0018276  0.0167146   0.109
## hormone_scr_ert_mean:caudate_posvsneg_feedback_z 0.0037076  0.0092531   0.401
##
##               Pr(>|t|)
## (Intercept)    0.512446
## PDS_score       0.000716 ***
## hormone_scr_ert_mean 0.954412
## caudate_posvsneg_feedback_z 0.905642
## race.ethnicity.5levelBlack 0.280439
## race.ethnicity.5levelMixed 0.002437 **
## race.ethnicity.5levelOther 0.008007 **
## race.ethnicity.5levelWhite 0.016756 *
## demo_race_hispanic1 0.695723
## interview_age    0.912943
## hormone_scr_ert_mean:caudate_posvsneg_feedback_z 0.688697
## ---
## Signif. codes:  0 '***' 0.001 '**' 0.01 '*' 0.05 '.' 0.1 ' ' 1
##
##
## R-sq.(adj) =  0.0104
## lmer.REML = 11469  Scale est. = 18.894  n = 1864
##
##               stdcoef      stdse
## X(Intercept)    0.00000000 0.00000000
## XPDS_score      0.083449931 0.02462325
## Xhormone_scr_ert_mean -0.001390307 0.02431675
## Xcaudate_posvsneg_feedback_z 0.006366573 0.05370187

```

```

## Xrace.ethnicity.5levelBlack          0.061180869 0.05666731
## Xrace.ethnicity.5levelMixed          0.173354353 0.05711465
## Xrace.ethnicity.5levelOther          0.109174442 0.04112562
## Xrace.ethnicity.5levelWhite          0.180030947 0.07519468
## Xdemo_race_hispanic1                 0.010363679 0.02649469
## Xinterview_age                       0.002600489 0.02378302
## Xhormone_scr_ert_mean:caudate_posvsneg_feedback_z 0.021559629 0.05380679

```

#### 4.19 Model: CBCL internalizing factor ~ Testosterone x Putamen activity (Feed-back stage) + PDS

##### Female participants

```

##
## Family: gaussian
## Link function: identity
##
## Formula:
## cbcl_scr_syn_internal_r ~ PDS_score + hormone_scr_ert_mean *
##   putamen_posvsneg_feedback_z + race.ethnicity.5level + demo_race_hispanic +
##   interview_age
##
## Parametric coefficients:
##
##               Estimate Std. Error t value
## (Intercept)    4.287337   2.120112   2.022
## PDS_score       0.674074   0.191044   3.528
## hormone_scr_ert_mean    0.002856   0.008144   0.351
## putamen_posvsneg_feedback_z -0.057460   0.364195  -0.158
## race.ethnicity.5levelBlack    0.353506   0.899655   0.393
## race.ethnicity.5levelMixed    2.143254   0.876523   2.445
## race.ethnicity.5levelOther    2.180848   0.997524   2.186
## race.ethnicity.5levelWhite    1.325057   0.823209   1.610
## demo_race_hispanic1    0.360481   0.359323   1.003
## interview_age    -0.017350   0.016925  -1.025
## hormone_scr_ert_mean:putamen_posvsneg_feedback_z -0.003165   0.009367  -0.338
##
##               Pr(>|t|)
## (Intercept)    0.043297 *
## PDS_score       0.000428 ***
## hormone_scr_ert_mean    0.725826
## putamen_posvsneg_feedback_z    0.874653
## race.ethnicity.5levelBlack    0.694413
## race.ethnicity.5levelMixed    0.014571 *
## race.ethnicity.5levelOther    0.028921 *
## race.ethnicity.5levelWhite    0.107650
## demo_race_hispanic1    0.315884
## interview_age    0.305453
## hormone_scr_ert_mean:putamen_posvsneg_feedback_z 0.735491
## ---
## Signif. codes:  0 '***' 0.001 '**' 0.01 '*' 0.05 '.' 0.1 ' ' 1
##
##
## R-sq.(adj) =  0.0116
## lmer.REML = 11483  Scale est. = 10.565    n = 1865

```

```

##                                stdcoef    stdse
## X(Intercept)                   0.00000000 0.00000000
## XPDS_score                      0.089424969 0.02534449
## Xhormone_scr_ert_mean           0.008533937 0.02433147
## Xputamen_posvsneg_feedback_z   -0.008689526 0.05507630
## Xrace.ethnicity.5levelBlack    0.021092081 0.05367831
## Xrace.ethnicity.5levelMixed    0.134877786 0.05516076
## Xrace.ethnicity.5levelOther    0.089750821 0.04105219
## Xrace.ethnicity.5levelWhite    0.115262984 0.07160866
## Xdemo_race_hispanic1          0.026804630 0.02671849
## Xinterview_age                 -0.024123053 0.02353253
## Xhormone_scr_ert_mean:putamen_posvsneg_feedback_z -0.018618912 0.05510494

```

### Male participants

```

##
## Family: gaussian
## Link function: identity
##
## Formula:
## cbcl_scr_syn_internal_r ~ PDS_score + hormone_scr_ert_mean *
##   putamen_posvsneg_feedback_z + race.ethnicity.5level + demo_race_hispanic +
##   interview_age
##
## Parametric coefficients:
##                                Estimate Std. Error t value
## (Intercept)                   0.9678945  2.1150864   0.458
## PDS_score                      0.8206911  0.2491162   3.294
## hormone_scr_ert_mean           0.0001559  0.0083903   0.019
## putamen_posvsneg_feedback_z    0.3279395  0.3259022   1.006
## race.ethnicity.5levelBlack     1.0351830  0.9199736   1.125
## race.ethnicity.5levelMixed     2.8187987  0.9041222   3.118
## race.ethnicity.5levelOther     2.8285173  1.0349923   2.733
## race.ethnicity.5levelWhite     2.1215584  0.8509597   2.493
## demo_race_hispanic1           0.0681918  0.3505186   0.195
## interview_age                  0.0050743  0.0167195   0.303
## hormone_scr_ert_mean:putamen_posvsneg_feedback_z -0.0049790  0.0091813  -0.542
##                                Pr(>|t|)
## (Intercept)                   0.64728
## PDS_score                      0.00100 **
## hormone_scr_ert_mean           0.98517
## putamen_posvsneg_feedback_z    0.31443
## race.ethnicity.5levelBlack     0.26064
## race.ethnicity.5levelMixed     0.00185 **
## race.ethnicity.5levelOther     0.00634 **
## race.ethnicity.5levelWhite     0.01275 *
## demo_race_hispanic1           0.84577
## interview_age                  0.76155
## hormone_scr_ert_mean:putamen_posvsneg_feedback_z 0.58768
## ---
## Signif. codes:  0 '***' 0.001 '**' 0.01 '*' 0.05 '.' 0.1 ' ' 1
##
##

```

```
## R-sq.(adj) = 0.0102
## lmer.REML = 11517 Scale est. = 19.045 n = 1870
```

```
##
##                                stdcoef    stdse
## X(Intercept)                   0.000000000 0.00000000
## XPDS_score                      0.0810367444 0.02459825
## Xhormone_scr_ert_mean            0.0004519792 0.02431881
## Xputamen_posvsneg_feedback_z    0.0536290875 0.05329591
## Xrace.ethnicity.5levelBlack     0.0629716317 0.05596328
## Xrace.ethnicity.5levelMixed     0.1760914006 0.05648085
## Xrace.ethnicity.5levelOther     0.1118613343 0.04093156
## Xrace.ethnicity.5levelWhite     0.1852841829 0.07431771
## Xdemo_race_hispanic1            0.0051603085 0.02652497
## Xinterview_age                  0.0072033788 0.02373469
## Xhormone_scr_ert_mean:putamen_posvsneg_feedback_z -0.0289168505 0.05332263
```

#### 4.20 Model: CBCL internalizing factor ~ Testosterone x Lateral OFC activity (anticipation stage) + PDS

##### Female participants

```
##
## Family: gaussian
## Link function: identity
##
## Formula:
## cbcl_scr_syn_internal_r ~ PDS_score + hormone_scr_ert_mean *
##   lOFC_rvsn_ant_z + race.ethnicity.5level + demo_race_hispanic +
##   interview_age
##
## Parametric coefficients:
##
##           Estimate Std. Error t value Pr(>|t|)
## (Intercept) 4.386035  2.139491  2.050 0.040501 *
## PDS_score   0.658410  0.191838  3.432 0.000612 ***
## hormone_scr_ert_mean 0.003086  0.008159  0.378 0.705274
## lOFC_rvsn_ant_z 0.330589  0.491379  0.673 0.501172
## race.ethnicity.5levelBlack 0.227744  0.906920  0.251 0.801751
## race.ethnicity.5levelMixed 2.115228  0.887612  2.383 0.017270 *
## race.ethnicity.5levelOther 2.179843  1.007403  2.164 0.030605 *
## race.ethnicity.5levelWhite 1.276544  0.832855  1.533 0.125512
## demo_race_hispanic1 0.358385  0.359093  0.998 0.318396
## interview_age -0.017460  0.017050 -1.024 0.305924
## hormone_scr_ert_mean:lOFC_rvsn_ant_z -0.007097  0.012725 -0.558 0.577086
## ---
## Signif. codes:  0 '***' 0.001 '**' 0.01 '*' 0.05 '.' 0.1 ' ' 1
##
##
## R-sq.(adj) = 0.0109
## lmer.REML = 11483 Scale est. = 10.83 n = 1864
##
##                                stdcoef    stdse
## X(Intercept)                   0.000000000 0.00000000
## XPDS_score                      0.087218772 0.02541257
```



```

## Xhormone_scr_ert_mean          0.009225083 0.02438763
## XlOFC_rvsn_ant_z              0.034944355 0.05194040
## Xrace.ethnicity.5levelBlack   0.013630564 0.05427961
## Xrace.ethnicity.5levelMixed   0.132116587 0.05544004
## Xrace.ethnicity.5levelOther   0.090248343 0.04170778
## Xrace.ethnicity.5levelWhite   0.110969448 0.07239970
## Xdemo_race_hispanic1         0.026757077 0.02680994
## Xinterview_age                -0.024258921 0.02368814
## Xhormone_scr_ert_mean:lOFC_rvsn_ant_z -0.028954334 0.05191328

```

### Male participants

```

##
## Family: gaussian
## Link function: identity
##
## Formula:
## cbcl_scr_syn_internal_r ~ PDS_score + hormone_scr_ert_mean *
##   lOFC_rvsn_ant_z + race.ethnicity.5level + demo_race_hispanic +
##   interview_age
##
## Parametric coefficients:
##              Estimate Std. Error t value Pr(>|t|)
## (Intercept)    0.150908   2.087223   0.072  0.94237
## PDS_score      0.735069   0.248610   2.957  0.00315 **
## hormone_scr_ert_mean -0.003581   0.008285  -0.432  0.66566
## lOFC_rvsn_ant_z  0.318482   0.425928   0.748  0.45472
## race.ethnicity.5levelBlack  0.995449   0.908689   1.095  0.27345
## race.ethnicity.5levelMixed  2.714104   0.892622   3.041  0.00239 **
## race.ethnicity.5levelOther  2.660468   1.024339   2.597  0.00947 **
## race.ethnicity.5levelWhite  1.971262   0.838789   2.350  0.01887 *
## demo_race_hispanic1 -0.018859   0.345314  -0.055  0.95645
## interview_age    0.014731   0.016549   0.890  0.37349
## hormone_scr_ert_mean:lOFC_rvsn_ant_z -0.011844   0.012319  -0.962  0.33642
## ---
## Signif. codes:  0 '***' 0.001 '**' 0.01 '*' 0.05 '.' 0.1 ' ' 1
##
##
## R-sq.(adj) =  0.0088
## lmer.REML = 11420  Scale est. = 18.159    n = 1863

##              stdcoef      stdse
## X(Intercept)    0.00000000 0.00000000
## XPDS_score      0.073113645 0.02472805
## Xhormone_scr_ert_mean -0.010454089 0.02418883
## XlOFC_rvsn_ant_z  0.037501635 0.05015365
## Xrace.ethnicity.5levelBlack  0.061069392 0.05574683
## Xrace.ethnicity.5levelMixed  0.171722959 0.05647675
## Xrace.ethnicity.5levelOther  0.105783195 0.04072886
## Xrace.ethnicity.5levelWhite  0.174235445 0.07413867
## Xdemo_race_hispanic1 -0.001449026 0.02653155
## Xinterview_age    0.021210017 0.02382701
## Xhormone_scr_ert_mean:lOFC_rvsn_ant_z -0.048290370 0.05022375

```

## 4.21 Model: CBCL internalizing factor ~ Testosterone x Medial OFC activity (anticipation stage) + PDS

### Female participants

```
##
## Family: gaussian
## Link function: identity
##
## Formula:
## cbcl_scr_syn_internal_r ~ PDS_score + hormone_scr_ert_mean *
##   mOFC_rvsn_ant_z + race.ethnicity.5level + demo_race_hispanic +
##   interview_age
##
## Parametric coefficients:
##               Estimate Std. Error t value Pr(>|t|)
## (Intercept)    4.202280   2.132609   1.970 0.048931 *
## PDS_score       0.676571   0.191614   3.531 0.000424 ***
## hormone_scr_ert_mean
## mOFC_rvsn_ant_z  0.063317   0.437193   0.145 0.884864
## race.ethnicity.5levelBlack
## race.ethnicity.5levelMixed
## race.ethnicity.5levelOther
## race.ethnicity.5levelWhite
## demo_race_hispanic1
## interview_age   -0.016049   0.016989  -0.945 0.344951
## hormone_scr_ert_mean:mOFC_rvsn_ant_z  0.002991   0.011334   0.264 0.791898
## ---
## Signif. codes:  0 '***' 0.001 '**' 0.01 '*' 0.05 '.' 0.1 ' ' 1
##
##
## R-sq.(adj) =  0.0115
## lmer.REML = 11480  Scale est. = 10.572    n = 1864

##               stdcoef    stdse
## X(Intercept)    0.00000000  0.00000000
## XPDS_score      0.089377321  0.02531284
## Xhormone_scr_ert_mean
## XmOFC_rvsn_ant_z  0.007704058  0.02424402
## Xrace.ethnicity.5levelBlack
## Xrace.ethnicity.5levelMixed
## Xrace.ethnicity.5levelOther
## Xrace.ethnicity.5levelWhite
## Xdemo_race_hispanic1
## Xinterview_age  -0.022263668  0.02356767
## Xhormone_scr_ert_mean:mOFC_rvsn_ant_z  0.014123809  0.05352261
```

### Male participants

```
##
## Family: gaussian
## Link function: identity
##
```

```

## Formula:
## cbcl_scr_syn_internal_r ~ PDS_score + hormone_scr_ert_mean *
##   mOFC_rvsn_ant_z + race.ethnicity.5level + demo_race_hispanic +
##   interview_age
##
## Parametric coefficients:
##
##           Estimate Std. Error t value Pr(>|t|)
## (Intercept)      0.3832360   2.0976904   0.183  0.85506
## PDS_score         0.7451921   0.2484437   2.999  0.00274 **
## hormone_scr_ert_mean -0.0048427   0.0082810  -0.585  0.55876
## mOFC_rvsn_ant_z    0.2130617   0.3870717   0.550  0.58208
## race.ethnicity.5levelBlack  1.0194439   0.9127620   1.117  0.26419
## race.ethnicity.5levelMixed  2.6588881   0.8961882   2.967  0.00305 **
## race.ethnicity.5levelOther  2.6485499   1.0260213   2.581  0.00992 **
## race.ethnicity.5levelWhite  1.9814512   0.8424593   2.352  0.01878 *
## demo_race_hispanic1  0.0445607   0.3461643   0.129  0.89759
## interview_age      0.0129518   0.0166157   0.779  0.43579
## hormone_scr_ert_mean:mOFC_rvsn_ant_z -0.0001119   0.0109075  -0.010  0.99182
## ---
## Signif. codes:  0 '***' 0.001 '**' 0.01 '*' 0.05 '.' 0.1 ' ' 1
##
##
## R-sq.(adj) =  0.0096
## lmer.REML = 11397  Scale est. = 18.344   n = 1857

##
##           stdcoef      stdse
## X(Intercept)      0.000000000  0.00000000
## XPDS_score        0.0741649416  0.02472626
## Xhormone_scr_ert_mean -0.0141767364  0.02424212
## XmOFC_rvsn_ant_z    0.0273278189  0.04964676
## Xrace.ethnicity.5levelBlack  0.0621167897  0.05561644
## Xrace.ethnicity.5levelMixed  0.1677608905  0.05654443
## Xrace.ethnicity.5levelOther  0.1056256681  0.04091831
## Xrace.ethnicity.5levelWhite  0.1744784954  0.07418353
## Xdemo_race_hispanic1  0.0034169889  0.02654445
## Xinterview_age      0.0185909553  0.02385014
## Xhormone_scr_ert_mean:mOFC_rvsn_ant_z -0.0005086038  0.04957859

```

## 4.22 Model: CBCL internalizing factor ~ Testosterone x Lateral OFC activity (feedback stage) + PDS

### Female participants

```

##
## Family: gaussian
## Link function: identity
##
## Formula:
## cbcl_scr_syn_internal_r ~ PDS_score + hormone_scr_ert_mean *
##   lOFC_posvsneg_feedback_z + race.ethnicity.5level + demo_race_hispanic +
##   interview_age
##
## Parametric coefficients:

```

```

##                               Estimate Std. Error t value
## (Intercept)                   4.334290   2.117637   2.047
## PDS_score                      0.673271   0.190513   3.534
## hormone_scr_ert_mean           0.001130   0.008091   0.140
## lOFC_posvsneg_feedback_z       0.550378   0.567460   0.970
## race.ethnicity.5levelBlack     0.298496   0.894428   0.334
## race.ethnicity.5levelMixed     2.147933   0.873735   2.458
## race.ethnicity.5levelOther     2.515196   0.999082   2.518
## race.ethnicity.5levelWhite     1.364823   0.819389   1.666
## demo_race_hispanic1           0.238185   0.357406   0.666
## interview_age                  -0.017253   0.016901  -1.021
## hormone_scr_ert_mean:lOFC_posvsneg_feedback_z -0.019692   0.014952  -1.317
##                               Pr(>|t|)
## (Intercept)                   0.040823 *
## PDS_score                      0.000419 ***
## hormone_scr_ert_mean           0.888980
## lOFC_posvsneg_feedback_z       0.332224
## race.ethnicity.5levelBlack     0.738622
## race.ethnicity.5levelMixed     0.014049 *
## race.ethnicity.5levelOther     0.011903 *
## race.ethnicity.5levelWhite     0.095950 .
## demo_race_hispanic1           0.505222
## interview_age                  0.307481
## hormone_scr_ert_mean:lOFC_posvsneg_feedback_z 0.188010
## ---
## Signif. codes:  0 '***' 0.001 '**' 0.01 '*' 0.05 '.' 0.1 ' ' 1
##
##
## R-sq.(adj) =  0.0128
## lmer.REML = 11471  Scale est. = 10.543   n = 1865

##                               stdcoef      stdse
## X(Intercept)                   0.000000000 0.000000000
## XPDS_score                     0.089530985 0.02533420
## Xhormone_scr_ert_mean           0.003392483 0.02429891
## XlOFC_posvsneg_feedback_z       0.051315582 0.05290828
## Xrace.ethnicity.5levelBlack     0.017930105 0.05372656
## Xrace.ethnicity.5levelMixed     0.134618193 0.05475990
## Xrace.ethnicity.5levelOther     0.102781970 0.04082687
## Xrace.ethnicity.5levelWhite     0.118852302 0.07135454
## Xdemo_race_hispanic1           0.017760349 0.02665016
## Xinterview_age                  -0.024044745 0.02355472
## Xhormone_scr_ert_mean:lOFC_posvsneg_feedback_z -0.069808143 0.05300648

```

## Male participants

```

##
## Family: gaussian
## Link function: identity
##
## Formula:
## cbcl_scr_syn_internal_r ~ PDS_score + hormone_scr_ert_mean *
##   lOFC_posvsneg_feedback_z + race.ethnicity.5level + demo_race_hispanic +

```

```

##      interview_age
##
## Parametric coefficients:
##
##              Estimate Std. Error t value
## (Intercept)      0.714685   2.088512   0.342
## PDS_score         0.783974   0.246780   3.177
## hormone_scr_ert_mean -0.003902   0.008305  -0.470
## lOFC_posvsneg_feedback_z 0.077362   0.470889   0.164
## race.ethnicity.5levelBlack 1.077394   0.910723   1.183
## race.ethnicity.5levelMixed 2.805075   0.893849   3.138
## race.ethnicity.5levelOther 2.628287   1.029908   2.552
## race.ethnicity.5levelWhite 2.036011   0.840929   2.421
## demo_race_hispanic1 0.054593   0.346160   0.158
## interview_age      0.009083   0.016537   0.549
## hormone_scr_ert_mean:lOFC_posvsneg_feedback_z 0.001431   0.013061   0.110
##
##              Pr(>|t|)
## (Intercept)      0.73224
## PDS_score         0.00151 **
## hormone_scr_ert_mean 0.63848
## lOFC_posvsneg_feedback_z 0.86952
## race.ethnicity.5levelBlack 0.23696
## race.ethnicity.5levelMixed 0.00173 **
## race.ethnicity.5levelOther 0.01079 *
## race.ethnicity.5levelWhite 0.01557 *
## demo_race_hispanic1 0.87470
## interview_age      0.58291
## hormone_scr_ert_mean:lOFC_posvsneg_feedback_z 0.91278
## ---
## Signif. codes:  0 '***' 0.001 '**' 0.01 '*' 0.05 '.' 0.1 ' ' 1
##
##
## R-sq.(adj) =  0.00925
## lmer.REML = 11479  Scale est. = 18.264    n = 1871

##
##              stdcoef      stdse
## X(Intercept)      0.000000000 0.000000000
## XPDS_score        0.078132761 0.02459470
## Xhormone_scr_ert_mean -0.011391423 0.02424239
## XlOFC_posvsneg_feedback_z 0.008171791 0.04974011
## Xrace.ethnicity.5levelBlack 0.065904541 0.05570922
## Xrace.ethnicity.5levelMixed 0.177587855 0.05658912
## Xrace.ethnicity.5levelOther 0.103380522 0.04051021
## Xrace.ethnicity.5levelWhite 0.179456733 0.07412056
## Xdemo_race_hispanic1 0.004179204 0.02649933
## Xinterview_age     0.013060368 0.02377935
## Xhormone_scr_ert_mean:lOFC_posvsneg_feedback_z 0.005459776 0.04983746

```

#### 4.23 Model: CBCL internalizing factor ~ Testosterone x Medial OFC activity (feedback stage) + PDS

Female participants

```
##
```

```

## Family: gaussian
## Link function: identity
##
## Formula:
## cbcl_scr_syn_internal_r ~ PDS_score + hormone_scr_ert_mean *
##   mOFC_posvsneg_feedback_z + race.ethnicity.5level + demo_race_hispanic +
##   interview_age
##
## Parametric coefficients:
##
##           Estimate Std. Error t value
## (Intercept)      4.369334   2.116941   2.064
## PDS_score         0.684020   0.190714   3.587
## hormone_scr_ert_mean 0.002015   0.008095   0.249
## mOFC_posvsneg_feedback_z 0.562287   0.484833   1.160
## race.ethnicity.5levelBlack 0.271402   0.896065   0.303
## race.ethnicity.5levelMixed 2.143308   0.874392   2.451
## race.ethnicity.5levelOther 2.290652   0.993534   2.306
## race.ethnicity.5levelWhite 1.335606   0.819977   1.629
## demo_race_hispanic1 0.315052   0.357365   0.882
## interview_age     -0.017840   0.016903  -1.055
## hormone_scr_ert_mean:mOFC_posvsneg_feedback_z -0.019533   0.012998  -1.503
##
##           Pr(>|t|)
## (Intercept)      0.039158 *
## PDS_score         0.000344 ***
## hormone_scr_ert_mean 0.803458
## mOFC_posvsneg_feedback_z 0.246298
## race.ethnicity.5levelBlack 0.762013
## race.ethnicity.5levelMixed 0.014330 *
## race.ethnicity.5levelOther 0.021245 *
## race.ethnicity.5levelWhite 0.103518
## demo_race_hispanic1 0.378109
## interview_age     0.291362
## hormone_scr_ert_mean:mOFC_posvsneg_feedback_z 0.133070
## ---
## Signif. codes:  0 '***' 0.001 '**' 0.01 '*' 0.05 '.' 0.1 ' ' 1
##
##
## R-sq.(adj) =  0.0133
## lmer.REML = 11481  Scale est. = 10.705    n = 1866
##
##
##           stdcoef      stdse
## X(Intercept)      0.000000000 0.000000000
## XPDS_score        0.090846633 0.02532931
## Xhormone_scr_ert_mean 0.006043042 0.02427799
## XmOFC_posvsneg_feedback_z 0.063887955 0.05508752
## Xrace.ethnicity.5levelBlack 0.016222048 0.05355889
## Xrace.ethnicity.5levelMixed 0.134192510 0.05474567
## Xrace.ethnicity.5levelOther 0.094893539 0.04115858
## Xrace.ethnicity.5levelWhite 0.116250283 0.07137022
## Xdemo_race_hispanic1 0.023515428 0.02667365
## Xinterview_age     -0.024822076 0.02351827
## Xhormone_scr_ert_mean:mOFC_posvsneg_feedback_z -0.082792073 0.05509320

```

## Male participants

```
##
## Family: gaussian
## Link function: identity
##
## Formula:
## cbcl_scr_syn_internal_r ~ PDS_score + hormone_scr_ert_mean *
##   mOFC_posvsneg_feedback_z + race.ethnicity.5level + demo_race_hispanic +
##   interview_age
##
## Parametric coefficients:
##
##           Estimate Std. Error t value
## (Intercept)      0.705120   2.085170   0.338
## PDS_score         0.790538   0.246908   3.202
## hormone_scr_ert_mean -0.003745   0.008306  -0.451
## mOFC_posvsneg_feedback_z  0.539658   0.420064   1.285
## race.ethnicity.5levelBlack  1.043013   0.910260   1.146
## race.ethnicity.5levelMixed  2.833043   0.893757   3.170
## race.ethnicity.5levelOther  2.681549   1.026752   2.612
## race.ethnicity.5levelWhite  2.032990   0.840740   2.418
## demo_race_hispanic1      0.026393   0.345459   0.076
## interview_age         0.009054   0.016506   0.549
## hormone_scr_ert_mean:mOFC_posvsneg_feedback_z -0.006810   0.012039  -0.566
##
##           Pr(>|t|)
## (Intercept)      0.73528
## PDS_score         0.00139 **
## hormone_scr_ert_mean  0.65210
## mOFC_posvsneg_feedback_z  0.19906
## race.ethnicity.5levelBlack  0.25201
## race.ethnicity.5levelMixed  0.00155 **
## race.ethnicity.5levelOther  0.00908 **
## race.ethnicity.5levelWhite  0.01570 *
## demo_race_hispanic1      0.93911
## interview_age         0.58341
## hormone_scr_ert_mean:mOFC_posvsneg_feedback_z  0.57169
## ---
## Signif. codes:  0 '***' 0.001 '**' 0.01 '*' 0.05 '.' 0.1 ' ' 1
##
##
## R-sq.(adj) =  0.0111
## lmer.REML = 11466  Scale est. = 18.396    n = 1869

##
##           stdcoef      stdse
## X(Intercept)      0.000000000 0.000000000
## XPDS_score        0.078701912 0.02458087
## Xhormone_scr_ert_mean -0.010959530 0.02430454
## XmOFC_posvsneg_feedback_z  0.066266778 0.05158130
## Xrace.ethnicity.5levelBlack  0.063912773 0.05577805
## Xrace.ethnicity.5levelMixed  0.179312006 0.05656865
## Xrace.ethnicity.5levelOther  0.106057369 0.04060885
## Xrace.ethnicity.5levelWhite  0.179287802 0.07414423
## Xdemo_race_hispanic1      0.002019782 0.02643724
## Xinterview_age      0.013009696 0.02371808
```

```
## Xhormone_scr_ert_mean:mOFC_posvsneg_feedback_z -0.029213472 0.05164401
```

#### 4.24 Model: CBCL internalizing factor ~ Testosterone x BIS-BAS RR + PDS

##### Female participants

```
##
## Family: gaussian
## Link function: identity
##
## Formula:
## cbcl_scr_syn_internal_r ~ PDS_score + hormone_scr_ert_mean *
##   bisbas_ss_basm_rr + race.ethnicity.5level + demo_race_hispanic +
##   interview_age
##
## Parametric coefficients:
##               Estimate Std. Error t value Pr(>|t|)
## (Intercept)    3.020293   2.129138   1.419 0.156158
## PDS_score       0.626624   0.169756   3.691 0.000228
## hormone_scr_ert_mean -0.009565   0.025287  -0.378 0.705274
## bisbas_ss_basm_rr  -0.084205   0.110618  -0.761 0.446597
## race.ethnicity.5levelBlack -0.041861   0.799020  -0.052 0.958222
## race.ethnicity.5levelMixed  1.640258   0.791942   2.071 0.038447
## race.ethnicity.5levelOther  2.486882   0.909634   2.734 0.006304
## race.ethnicity.5levelWhite  1.312543   0.742548   1.768 0.077250
## demo_race_hispanic1    0.027915   0.326365   0.086 0.931844
## interview_age         0.003614   0.015214   0.238 0.812240
## hormone_scr_ert_mean:bisbas_ss_basm_rr 0.001030   0.002812   0.366 0.714173
##
## (Intercept)
## PDS_score          ***
## hormone_scr_ert_mean
## bisbas_ss_basm_rr
## race.ethnicity.5levelBlack
## race.ethnicity.5levelMixed      *
## race.ethnicity.5levelOther     **
## race.ethnicity.5levelWhite      .
## demo_race_hispanic1
## interview_age
## hormone_scr_ert_mean:bisbas_ss_basm_rr
## ---
## Signif. codes:  0 '***' 0.001 '**' 0.01 '*' 0.05 '.' 0.1 ' ' 1
##
##
## R-sq.(adj) =  0.011
## lmer.REML = 15183 Scale est. = 12.902    n = 2443

##               stdcoef      stdse
## X(Intercept)    0.000000000 0.000000000
## XPDS_score      0.082604510 0.02237807
## Xhormone_scr_ert_mean -0.028244945 0.07467170
## Xbisbas_ss_basm_rr -0.035672492 0.04686200
## Xrace.ethnicity.5levelBlack -0.002670114 0.05096549
```



```

## Xrace.ethnicity.5levelMixed          0.100690667 0.04861502
## Xrace.ethnicity.5levelOther          0.096891536 0.03544029
## Xrace.ethnicity.5levelWhite          0.113429746 0.06417085
## Xdemo_race_hispanic1                 0.002007520 0.02347058
## Xinterview_age                       0.004948478 0.02083018
## Xhormone_scr_ert_mean:bisbas_ss_basm_rr 0.031154003 0.08505036

```

## Male participants

```

##
## Family: gaussian
## Link function: identity
##
## Formula:
## cbcl_scr_syn_internal_r ~ PDS_score + hormone_scr_ert_mean *
##   bisbas_ss_basm_rr + race.ethnicity.5level + demo_race_hispanic +
##   interview_age
##
## Parametric coefficients:
##               Estimate Std. Error t value Pr(>|t|)
## (Intercept)    2.9592426  2.1028478   1.407  0.1595
## PDS_score       0.9679803  0.2133487   4.537 5.96e-06
## hormone_scr_ert_mean -0.0087963  0.0275527  -0.319  0.7496
## bisbas_ss_basm_rr -0.0425337  0.1025861  -0.415  0.6785
## race.ethnicity.5levelBlack  1.2248010  0.7870707   1.556  0.1198
## race.ethnicity.5levelMixed  1.9529549  0.7843751   2.490  0.0128
## race.ethnicity.5levelOther  1.6129400  0.9007965   1.791  0.0735
## race.ethnicity.5levelWhite  1.4416035  0.7352031   1.961  0.0500
## demo_race_hispanic1    0.3094286  0.3135437   0.987  0.3238
## interview_age    -0.0027965  0.0148992  -0.188  0.8511
## hormone_scr_ert_mean:bisbas_ss_basm_rr 0.0009086  0.0029456   0.308  0.7578
##
## (Intercept)
## PDS_score          ***
## hormone_scr_ert_mean
## bisbas_ss_basm_rr
## race.ethnicity.5levelBlack
## race.ethnicity.5levelMixed      *
## race.ethnicity.5levelOther      .
## race.ethnicity.5levelWhite      .
## demo_race_hispanic1
## interview_age
## hormone_scr_ert_mean:bisbas_ss_basm_rr
## ---
## Signif. codes:  0 '***' 0.001 '**' 0.01 '*' 0.05 '.' 0.1 ' ' 1
##
##
## R-sq.(adj) =  0.00677
## lmer.REML = 16493  Scale est. = 16.687    n = 2635
##
##               stdcoef      stdse
## X(Intercept)  0.00000000 0.00000000
## XPDS_score    0.094090592 0.02073813

```

```

## Xhormone_scr_ert_mean -0.024455762 0.07660252
## Xbisbas_ss_basm_rr -0.017511467 0.04223552
## Xrace.ethnicity.5levelBlack 0.077047126 0.04951134
## Xrace.ethnicity.5levelMixed 0.115244212 0.04628611
## Xrace.ethnicity.5levelOther 0.061763665 0.03449384
## Xrace.ethnicity.5levelWhite 0.122320168 0.06238204
## Xdemo_race_hispanic1 0.022084175 0.02237788
## Xinterview_age -0.003769998 0.02008560
## Xhormone_scr_ert_mean:bisbas_ss_basm_rr 0.026593228 0.08621131

```

#### 4.25 Model: CBCL internalizing factor ~ Testosterone x MID Reaction Time + PDS (large reward vs. neutral)

##### Female participants

```

##
## Family: gaussian
## Link function: identity
##
## Formula:
## cbcl_scr_syn_internal_r ~ PDS_score + hormone_scr_ert_mean *
##   rt_diff_large_neutral_z + race.ethnicity.5level + demo_race_hispanic +
##   interview_age
##
## Parametric coefficients:
##
##           Estimate Std. Error t value
## (Intercept) 4.907584  2.030917  2.416
## PDS_score    0.640866  0.184675  3.470
## hormone_scr_ert_mean 0.002759  0.007808  0.353
## rt_diff_large_neutral_z -0.234714  0.298041 -0.788
## race.ethnicity.5levelBlack 0.234371  0.848919  0.276
## race.ethnicity.5levelMixed 2.018688  0.835051  2.417
## race.ethnicity.5levelOther 2.518939  0.951958  2.646
## race.ethnicity.5levelWhite 1.333646  0.780222  1.709
## demo_race_hispanic1 0.310120  0.350440  0.885
## interview_age -0.021805  0.016262 -1.341
## hormone_scr_ert_mean:rt_diff_large_neutral_z 0.010525  0.007542  1.395
##
##           Pr(>|t|)
## (Intercept) 0.015762 *
## PDS_score    0.000531 ***
## hormone_scr_ert_mean 0.723886
## rt_diff_large_neutral_z 0.431069
## race.ethnicity.5levelBlack 0.782514
## race.ethnicity.5levelMixed 0.015719 *
## race.ethnicity.5levelOther 0.008207 **
## race.ethnicity.5levelWhite 0.087547 .
## demo_race_hispanic1 0.376293
## interview_age 0.180119
## hormone_scr_ert_mean:rt_diff_large_neutral_z 0.163025
## ---
## Signif. codes:  0 '***' 0.001 '**' 0.01 '*' 0.05 '.' 0.1 ' ' 1
##
##

```

```
## R-sq.(adj) = 0.0141
## lmer.REML = 12398 Scale est. = 11.344 n = 2014
```

|                                                  | stdcoef      | stdse      |
|--------------------------------------------------|--------------|------------|
| ## X(Intercept)                                  | 0.000000000  | 0.00000000 |
| ## XPDS_score                                    | 0.084660536  | 0.02439626 |
| ## Xhormone_scr_ert_mean                         | 0.008240673  | 0.02332361 |
| ## Xrt_diff_large_neutral_z                      | -0.040099945 | 0.05091906 |
| ## Xrace.ethnicity.5levelBlack                   | 0.014379534  | 0.05208437 |
| ## Xrace.ethnicity.5levelMixed                   | 0.125306101  | 0.05183418 |
| ## Xrace.ethnicity.5levelOther                   | 0.102723097  | 0.03882115 |
| ## Xrace.ethnicity.5levelWhite                   | 0.116282984  | 0.06802895 |
| ## Xdemo_race_hispanic1                          | 0.022839216  | 0.02580865 |
| ## Xinterview_age                                | -0.030444450 | 0.02270520 |
| ## Xhormone_scr_ert_mean:rt_diff_large_neutral_z | 0.070724384  | 0.05068090 |

### Male participants

```
##
## Family: gaussian
## Link function: identity
##
## Formula:
## cbcl_scr_syn_internal_r ~ PDS_score + hormone_scr_ert_mean *
##   rt_diff_large_neutral_z + race.ethnicity.5level + demo_race_hispanic +
##   interview_age
##
## Parametric coefficients:
##
##           Estimate Std. Error t value
## (Intercept)      1.4502677   2.0225524   0.717
## PDS_score         0.7057552   0.2370283   2.978
## hormone_scr_ert_mean -0.0002715   0.0079566  -0.034
## rt_diff_large_neutral_z  0.4957660   0.2919671   1.698
## race.ethnicity.5levelBlack  0.6326718   0.8872742   0.713
## race.ethnicity.5levelMixed  2.1038840   0.8757925   2.402
## race.ethnicity.5levelOther  1.7323746   1.0030273   1.727
## race.ethnicity.5levelWhite  1.3926335   0.8266765   1.685
## demo_race_hispanic1    0.1495244   0.3362208   0.445
## interview_age         0.0083807   0.0159449   0.526
## hormone_scr_ert_mean:rt_diff_large_neutral_z -0.0100928   0.0080219  -1.258
##
##           Pr(>|t|)
## (Intercept)      0.47342
## PDS_score         0.00294 **
## hormone_scr_ert_mean  0.97278
## rt_diff_large_neutral_z  0.08965 .
## race.ethnicity.5levelBlack  0.47589
## race.ethnicity.5levelMixed  0.01638 *
## race.ethnicity.5levelOther  0.08429 .
## race.ethnicity.5levelWhite  0.09221 .
## demo_race_hispanic1    0.65657
## interview_age         0.59922
## hormone_scr_ert_mean:rt_diff_large_neutral_z  0.20848
## ---
```

```

## Signif. codes:  0 '***' 0.001 '**' 0.01 '*' 0.05 '.' 0.1 ' ' 1
##
##
## R-sq.(adj) =  0.00659
## lmer.REML = 12919  Scale est. = 18.48      n = 2091

##                                stdcoef      stdse
## X(Intercept)                   0.000000000 0.000000000
## XPDS_score                      0.069119463 0.02321381
## Xhormone_scr_ert_mean           -0.000781842 0.02291272
## Xrt_diff_large_neutral_z       0.081233508 0.04784013
## Xrace.ethnicity.5levelBlack    0.039292945 0.05510537
## Xrace.ethnicity.5levelMixed    0.132138312 0.05500576
## Xrace.ethnicity.5levelOther    0.067907695 0.03931787
## Xrace.ethnicity.5levelWhite    0.121809959 0.07230720
## Xdemo_race_hispanic1          0.011139253 0.02504774
## Xinterview_age                  0.011829687 0.02250680
## Xhormone_scr_ert_mean:rt_diff_large_neutral_z -0.060140297 0.04780078

```

## 4.26 Model: CBCL internalizing factor ~ Testosterone x MID Reaction Time + PDS (large vs. small reward)

### Female participants

```

##
## Family: gaussian
## Link function: identity
##
## Formula:
## cbcl_scr_syn_internal_r ~ PDS_score + hormone_scr_ert_mean *
##   rt_diff_large_small_z + race.ethnicity.5level + demo_race_hispanic +
##   interview_age
##
## Parametric coefficients:
##                                Estimate Std. Error t value
## (Intercept)                   4.830633  2.029793  2.380
## PDS_score                      0.653073  0.184699  3.536
## hormone_scr_ert_mean           0.001939  0.007810  0.248
## rt_diff_large_small_z        -0.398245  0.292018 -1.364
## race.ethnicity.5levelBlack    0.219698  0.848951  0.259
## race.ethnicity.5levelMixed    2.006919  0.835252  2.403
## race.ethnicity.5levelOther    2.487240  0.952491  2.611
## race.ethnicity.5levelWhite    1.329151  0.780631  1.703
## demo_race_hispanic1          0.281757  0.350482  0.804
## interview_age                 -0.020947  0.016244 -1.289
## hormone_scr_ert_mean:rt_diff_large_small_z  0.007626  0.007556  1.009
##                                Pr(>|t|)
## (Intercept)                   0.017412 *
## PDS_score                      0.000416 ***
## hormone_scr_ert_mean           0.803898
## rt_diff_large_small_z         0.172793
## race.ethnicity.5levelBlack    0.795825
## race.ethnicity.5levelMixed    0.016362 *

```

```

## race.ethnicity.5levelOther          0.009087 **
## race.ethnicity.5levelWhite          0.088786 .
## demo_race_hispanic1                 0.421543
## interview_age                        0.197374
## hormone_scr_ert_mean:rt_diff_large_small_z 0.312973
## ---
## Signif. codes:  0 '***' 0.001 '**' 0.01 '*' 0.05 '.' 0.1 ' ' 1
##
##
## R-sq.(adj) =  0.0132
## lmer.REML = 12399  Scale est. = 11.209    n = 2014

##                                stdcoef      stdse
## X(Intercept)                   0.000000000 0.00000000
## XPDS_score                      0.086273148 0.02439933
## Xhormone_scr_ert_mean           0.005793587 0.02332941
## Xrt_diff_large_small_z         -0.068777079 0.05043159
## Xrace.ethnicity.5levelBlack     0.013479336 0.05208638
## Xrace.ethnicity.5levelMixed     0.124575534 0.05184659
## Xrace.ethnicity.5levelOther     0.101430408 0.03884285
## Xrace.ethnicity.5levelWhite     0.115891113 0.06806462
## Xdemo_race_hispanic1           0.020750382 0.02581176
## Xinterview_age                  -0.029245957 0.02268009
## Xhormone_scr_ert_mean:rt_diff_large_small_z 0.050925567 0.05045846

```

## Male participants

```

##
## Family: gaussian
## Link function: identity
##
## Formula:
## cbcl_scr_syn_internal_r ~ PDS_score + hormone_scr_ert_mean *
##   rt_diff_large_small_z + race.ethnicity.5level + demo_race_hispanic +
##   interview_age
##
## Parametric coefficients:
##                                Estimate Std. Error t value
## (Intercept)                   1.5105404  2.0253677   0.746
## PDS_score                      0.6937632  0.2369733   2.928
## hormone_scr_ert_mean           -0.0003462  0.0079643  -0.043
## rt_diff_large_small_z         -0.0119908  0.2898251  -0.041
## race.ethnicity.5levelBlack     0.6102166  0.8879027   0.687
## race.ethnicity.5levelMixed     2.0562980  0.8760914   2.347
## race.ethnicity.5levelOther     1.6642936  1.0033058   1.659
## race.ethnicity.5levelWhite     1.3562003  0.8270570   1.640
## demo_race_hispanic1           0.1405787  0.3363157   0.418
## interview_age                  0.0083766  0.0159693   0.525
## hormone_scr_ert_mean:rt_diff_large_small_z -0.0016357  0.0082670  -0.198
##                                Pr(>|t|)
## (Intercept)                   0.45587
## PDS_score                      0.00345 **
## hormone_scr_ert_mean           0.96533

```

```

## rt_diff_large_small_z          0.96700
## race.ethnicity.5levelBlack      0.49200
## race.ethnicity.5levelMixed      0.01901 *
## race.ethnicity.5levelOther      0.09730 .
## race.ethnicity.5levelWhite      0.10120
## demo_race_hispanic1            0.67599
## interview_age                   0.59996
## hormone_scr_ert_mean:rt_diff_large_small_z 0.84317
## ---
## Signif. codes:  0 '***' 0.001 '**' 0.01 '*' 0.05 '.' 0.1 ' ' 1
##
##
## R-sq.(adj) =  0.00531
## lmer.REML = 12922  Scale est. = 18.52    n = 2091

##                                stdcoef      stdse
## X(Intercept)                   0.000000000 0.00000000
## XPDS_score                      0.0679450047 0.02320843
## Xhormone_scr_ert_mean           -0.0009970233 0.02293495
## Xrt_diff_large_small_z         -0.0019734573 0.04769957
## Xrace.ethnicity.5levelBlack     0.0378983317 0.05514441
## Xrace.ethnicity.5levelMixed     0.1291495884 0.05502454
## Xrace.ethnicity.5levelOther     0.0652389737 0.03932878
## Xrace.ethnicity.5levelWhite     0.1186232462 0.07234048
## Xdemo_race_hispanic1            0.0104728182 0.02505481
## Xinterview_age                  0.0118238679 0.02254134
## Xhormone_scr_ert_mean:rt_diff_large_small_z -0.0094174136 0.04759658

```



## 5— Correlation Matrix —

### Female participants

| x1                      | x2                      | N    | corr          | p                |
|-------------------------|-------------------------|------|---------------|------------------|
| bmi                     | interview_age           | 2675 | 0.0777979236  | 0.00005626170294 |
| PDS_score               | interview_age           | 2701 | 0.2397245643  | 0.00000000000000 |
| PDS_score               | bmi                     | 2675 | 0.2883194569  | 0.00000000000000 |
| cbcl_scr_syn_internal_r | interview_age           | 2701 | 0.0011506908  | 0.95233479027429 |
| cbcl_scr_syn_internal_r | bmi                     | 2675 | 0.0643351043  | 0.00087054703099 |
| cbcl_scr_syn_internal_r | PDS_score               | 2701 | 0.0576397227  | 0.00272912600408 |
| hormone_scr_ert_mean_z  | interview_age           | 2514 | 0.2111922127  | 0.00000000000000 |
| hormone_scr_ert_mean_z  | bmi                     | 2488 | 0.2011164615  | 0.00000000000000 |
| hormone_scr_ert_mean_z  | PDS_score               | 2514 | 0.3194091104  | 0.00000000000000 |
| hormone_scr_ert_mean_z  | cbcl_scr_syn_internal_r | 2514 | 0.0149428266  | 0.45391772219595 |
| bisbas_ss_basm_rr_z     | interview_age           | 2690 | -0.0324228218 | 0.09270914672107 |
| bisbas_ss_basm_rr_z     | bmi                     | 2664 | 0.0518639980  | 0.00741845859611 |
| bisbas_ss_basm_rr_z     | PDS_score               | 2690 | 0.0567567189  | 0.00323263005375 |
| bisbas_ss_basm_rr_z     | cbcl_scr_syn_internal_r | 2690 | -0.0234766912 | 0.22351849161127 |
| bisbas_ss_basm_rr_z     | hormone_scr_ert_mean_z  | 2504 | -0.0149523266 | 0.45453109921919 |
| rt_diff_large_neutral_z | interview_age           | 2229 | 0.0444337653  | 0.03593351564518 |
| rt_diff_large_neutral_z | bmi                     | 2206 | -0.0079826125 | 0.70786767361752 |
| rt_diff_large_neutral_z | PDS_score               | 2229 | -0.0029053436 | 0.89095865956824 |
| rt_diff_large_neutral_z | cbcl_scr_syn_internal_r | 2229 | 0.0166852282  | 0.43107074180790 |
| rt_diff_large_neutral_z | hormone_scr_ert_mean_z  | 2088 | -0.0216332136 | 0.32313034241508 |
| rt_diff_large_neutral_z | bisbas_ss_basm_rr_z     | 2220 | -0.0006405387 | 0.97593690877362 |
| rt_diff_large_small_z   | interview_age           | 2229 | 0.0219796326  | 0.29961846451327 |
| rt_diff_large_small_z   | bmi                     | 2206 | -0.0213846091 | 0.31540780939492 |
| rt_diff_large_small_z   | PDS_score               | 2229 | -0.0170095374 | 0.42216737250534 |
| rt_diff_large_small_z   | cbcl_scr_syn_internal_r | 2229 | -0.0216931306 | 0.30596364272833 |
| rt_diff_large_small_z   | hormone_scr_ert_mean_z  | 2087 | -0.0043284021 | 0.84334249311512 |
| rt_diff_large_small_z   | bisbas_ss_basm_rr_z     | 2220 | -0.0231864210 | 0.27483168284004 |
| rt_diff_large_small_z   | rt_diff_large_neutral_z | 2201 | 0.4179924701  | 0.00000000000000 |
| accumbens_rvsn_ant_z    | interview_age           | 2237 | 0.0114048219  | 0.58979774095617 |
| accumbens_rvsn_ant_z    | bmi                     | 2214 | -0.0481381380 | 0.02350742889809 |
| accumbens_rvsn_ant_z    | PDS_score               | 2237 | -0.0022709471 | 0.91451215925587 |
| accumbens_rvsn_ant_z    | cbcl_scr_syn_internal_r | 2237 | -0.0011046109 | 0.95835696200010 |
| accumbens_rvsn_ant_z    | hormone_scr_ert_mean_z  | 2090 | -0.0393773431 | 0.07188968575698 |
| accumbens_rvsn_ant_z    | bisbas_ss_basm_rr_z     | 2229 | 0.0080008151  | 0.70577908106748 |
| accumbens_rvsn_ant_z    | rt_diff_large_neutral_z | 2084 | 0.0168178792  | 0.44287695646753 |
| accumbens_rvsn_ant_z    | rt_diff_large_small_z   | 2084 | 0.0278108340  | 0.20441541659964 |
| caudate_rvsn_ant_z      | interview_age           | 2236 | 0.0219258951  | 0.30004325750421 |
| caudate_rvsn_ant_z      | bmi                     | 2213 | -0.0383512800 | 0.07126491835157 |
| caudate_rvsn_ant_z      | PDS_score               | 2236 | -0.0398572505 | 0.05951099252948 |
| caudate_rvsn_ant_z      | cbcl_scr_syn_internal_r | 2236 | -0.0001264905 | 0.99523032935205 |
| caudate_rvsn_ant_z      | hormone_scr_ert_mean_z  | 2088 | -0.0281662362 | 0.19825798097841 |
| caudate_rvsn_ant_z      | bisbas_ss_basm_rr_z     | 2228 | -0.0060577944 | 0.77504638139374 |
| caudate_rvsn_ant_z      | rt_diff_large_neutral_z | 2080 | 0.0235573317  | 0.28287521125039 |
| caudate_rvsn_ant_z      | rt_diff_large_small_z   | 2079 | 0.0303883236  | 0.16602979724595 |
| caudate_rvsn_ant_z      | accumbens_rvsn_ant_z    | 2220 | 0.5792092513  | 0.00000000000000 |
| putamen_rvsn_ant_z      | interview_age           | 2232 | 0.0244479138  | 0.24827723868069 |
| putamen_rvsn_ant_z      | bmi                     | 2209 | -0.0416045359 | 0.05056502376294 |
| putamen_rvsn_ant_z      | PDS_score               | 2232 | -0.0601145918 | 0.00449673509563 |
| putamen_rvsn_ant_z      | cbcl_scr_syn_internal_r | 2232 | -0.0111745491 | 0.59774112699753 |
| putamen_rvsn_ant_z      | hormone_scr_ert_mean_z  | 2085 | -0.0240042818 | 0.27326293836512 |
| putamen_rvsn_ant_z      | bisbas_ss_basm_rr_z     | 2224 | -0.0131102287 | 0.53660946224109 |
| putamen_rvsn_ant_z      | rt_diff_large_neutral_z | 2077 | 0.0499082533  | 0.02293157373042 |
| putamen_rvsn_ant_z      | rt_diff_large_small_z   | 2076 | 0.0429202276  | 0.05054723967104 |



## Male participants

| x1                      | x2                      | N    | corr          | p               |
|-------------------------|-------------------------|------|---------------|-----------------|
| bmi                     | interview_age           | 2900 | 0.0920315763  | 0.0000006889469 |
| PDS_score               | interview_age           | 2924 | 0.1709640628  | 0.0000000000000 |
| PDS_score               | bmi                     | 2900 | 0.1999796195  | 0.0000000000000 |
| cbcl_scr_syn_internal_r | interview_age           | 2924 | 0.0048032993  | 0.7951536979285 |
| cbcl_scr_syn_internal_r | bmi                     | 2900 | 0.0671358414  | 0.0002970040156 |
| cbcl_scr_syn_internal_r | PDS_score               | 2924 | 0.0736940209  | 0.0000664496826 |
| hormone_scr_ert_mean_z  | interview_age           | 2719 | 0.1651198590  | 0.0000000000000 |
| hormone_scr_ert_mean_z  | bmi                     | 2696 | 0.1952656071  | 0.0000000000000 |
| hormone_scr_ert_mean_z  | PDS_score               | 2719 | 0.1818699124  | 0.0000000000000 |
| hormone_scr_ert_mean_z  | cbcl_scr_syn_internal_r | 2719 | 0.0031107954  | 0.8711993730656 |
| bisbas_ss_basm_rr_z     | interview_age           | 2907 | -0.0107959520 | 0.5606692971792 |
| bisbas_ss_basm_rr_z     | bmi                     | 2883 | 0.0733349112  | 0.0000810704533 |
| bisbas_ss_basm_rr_z     | PDS_score               | 2907 | 0.0547830388  | 0.0031300989251 |
| bisbas_ss_basm_rr_z     | cbcl_scr_syn_internal_r | 2907 | 0.0062881600  | 0.7346897684193 |
| bisbas_ss_basm_rr_z     | hormone_scr_ert_mean_z  | 2702 | 0.0394470083  | 0.0403317612151 |
| rt_diff_large_neutral_z | interview_age           | 2317 | -0.0125248599 | 0.5467846238585 |
| rt_diff_large_neutral_z | bmi                     | 2303 | -0.0043610748 | 0.8343127747883 |
| rt_diff_large_neutral_z | PDS_score               | 2317 | -0.0435115439 | 0.0362332963381 |
| rt_diff_large_neutral_z | cbcl_scr_syn_internal_r | 2317 | 0.0030708133  | 0.8825520064098 |
| rt_diff_large_neutral_z | hormone_scr_ert_mean_z  | 2153 | -0.0151380839 | 0.4826505237757 |
| rt_diff_large_neutral_z | bisbas_ss_basm_rr_z     | 2308 | -0.0149974799 | 0.4714302803412 |
| rt_diff_large_small_z   | interview_age           | 2327 | -0.0051579972 | 0.8036048138750 |
| rt_diff_large_small_z   | bmi                     | 2313 | 0.0073378533  | 0.7242997169935 |
| rt_diff_large_small_z   | PDS_score               | 2327 | -0.0174964117 | 0.3988816266765 |
| rt_diff_large_small_z   | cbcl_scr_syn_internal_r | 2327 | -0.0085058265 | 0.6817330193853 |
| rt_diff_large_small_z   | hormone_scr_ert_mean_z  | 2165 | -0.0255918733 | 0.2339340575978 |
| rt_diff_large_small_z   | bisbas_ss_basm_rr_z     | 2318 | -0.0046769321 | 0.8219376295062 |
| rt_diff_large_small_z   | rt_diff_large_neutral_z | 2297 | 0.3765420553  | 0.0000000000000 |
| accumbens_rvsn_ant_z    | interview_age           | 2334 | -0.0222598818 | 0.2823903366529 |
| accumbens_rvsn_ant_z    | bmi                     | 2319 | -0.0241546628 | 0.2449373017172 |
| accumbens_rvsn_ant_z    | PDS_score               | 2334 | -0.0050367610 | 0.8078468897401 |
| accumbens_rvsn_ant_z    | cbcl_scr_syn_internal_r | 2334 | -0.0277065434 | 0.1808689939010 |
| accumbens_rvsn_ant_z    | hormone_scr_ert_mean_z  | 2163 | -0.0085922236 | 0.6896102373768 |
| accumbens_rvsn_ant_z    | bisbas_ss_basm_rr_z     | 2322 | -0.0310751306 | 0.1343993142486 |
| accumbens_rvsn_ant_z    | rt_diff_large_neutral_z | 2136 | -0.0271739486 | 0.2093365727565 |
| accumbens_rvsn_ant_z    | rt_diff_large_small_z   | 2145 | -0.0148592024 | 0.4915610579548 |
| caudate_rvsn_ant_z      | interview_age           | 2335 | 0.0125379417  | 0.5448097811537 |
| caudate_rvsn_ant_z      | bmi                     | 2321 | -0.0235785001 | 0.2561735798566 |
| caudate_rvsn_ant_z      | PDS_score               | 2335 | -0.0120627715 | 0.5601596680241 |
| caudate_rvsn_ant_z      | cbcl_scr_syn_internal_r | 2335 | -0.0094961720 | 0.6464947816140 |
| caudate_rvsn_ant_z      | hormone_scr_ert_mean_z  | 2163 | -0.0009235512 | 0.9657591228348 |
| caudate_rvsn_ant_z      | bisbas_ss_basm_rr_z     | 2323 | -0.0136291044 | 0.5114601245295 |
| caudate_rvsn_ant_z      | rt_diff_large_neutral_z | 2135 | 0.0035885457  | 0.8683804663115 |
| caudate_rvsn_ant_z      | rt_diff_large_small_z   | 2143 | 0.0027205694  | 0.8998357470434 |
| caudate_rvsn_ant_z      | accumbens_rvsn_ant_z    | 2306 | 0.5963711143  | 0.0000000000000 |
| putamen_rvsn_ant_z      | interview_age           | 2336 | 0.0303725159  | 0.1422338747573 |
| putamen_rvsn_ant_z      | bmi                     | 2321 | -0.0378703566 | 0.0681305325944 |
| putamen_rvsn_ant_z      | PDS_score               | 2336 | 0.0084909641  | 0.6816778890089 |
| putamen_rvsn_ant_z      | cbcl_scr_syn_internal_r | 2336 | -0.0257950259 | 0.2126652870664 |
| putamen_rvsn_ant_z      | hormone_scr_ert_mean_z  | 2163 | 0.0172838342  | 0.4217244997837 |
| putamen_rvsn_ant_z      | bisbas_ss_basm_rr_z     | 2324 | -0.0089881147 | 0.6649612903899 |
| putamen_rvsn_ant_z      | rt_diff_large_neutral_z | 2134 | 0.0163507533  | 0.4502880759024 |
| putamen_rvsn_ant_z      | rt_diff_large_small_z   | 2143 | -0.0017338906 | 0.9360627280707 |
| putamen_rvsn_ant_z      | accumbens_rvsn_ant_z    | 2309 | 0.5469812194  | 0.0000000000000 |
| putamen_rvsn_ant_z      | caudate_rvsn_ant_z      | 2318 | 0.7826410426  | 0.0000000000000 |
| putamen_rvsn_ant_z      | interview_age           | 2318 | 0.0120510400  | 0.4887538973404 |

## 6— Compare Outliers to Non-Outliers on Demographic Variables

### Female participants

```
##          interview_age          bmi race.ethnicity.5level
##          4.567958e-03      2.428145e-01      6.700028e-05
##          household.income      high.educ      demo_race_hispanic
##          NaN      6.700028e-05      1.002051e-01
```

```
## -----Summary descriptives table by 'is_outlier_any'-----
##
```

|                        | not outlier<br>N=2492 | outlier<br>N=209 | p.overall |
|------------------------|-----------------------|------------------|-----------|
| interview_age          | 119 (7.52)            | 117 (7.26)       | 0.003     |
| bmi                    | 18.9 (4.05)           | 19.2 (4.56)      | 0.243     |
| race.ethnicity.5level: |                       |                  | <0.001    |
| Asian                  | 59 (2.40%)            | 2 (0.98%)        |           |
| Black                  | 359 (14.6%)           | 47 (23.0%)       |           |
| Mixed                  | 309 (12.6%)           | 36 (17.6%)       |           |
| Other                  | 113 (4.59%)           | 17 (8.33%)       |           |
| White                  | 1621 (65.9%)          | 102 (50.0%)      |           |
| household.income:      |                       |                  |           |
| <5K                    | 86 (3.73%)            | 9 (4.64%)        |           |
| [>=200K]               | 298 (12.9%)           | 16 (8.25%)       |           |
| [100K-200K]            | 699 (30.3%)           | 45 (23.2%)       |           |
| [12K-16K]              | 54 (2.34%)            | 7 (3.61%)        |           |
| [16K-25K]              | 98 (4.25%)            | 13 (6.70%)       |           |
| [25K-35K]              | 140 (6.07%)           | 18 (9.28%)       |           |
| [35K-50K]              | 193 (8.37%)           | 22 (11.3%)       |           |
| [50K-75K]              | 307 (13.3%)           | 29 (14.9%)       |           |
| [5K-12K]               | 83 (3.60%)            | 7 (3.61%)        |           |
| [75K-100K]             | 347 (15.1%)           | 28 (14.4%)       |           |
| high.educ:             |                       |                  | <0.001    |
| < HS Diploma           | 111 (4.46%)           | 11 (5.26%)       |           |
| Bachelor               | 660 (26.5%)           | 41 (19.6%)       |           |
| HS Diploma/GED         | 226 (9.07%)           | 29 (13.9%)       |           |
| Post Graduate Degree   | 880 (35.3%)           | 51 (24.4%)       |           |
| Some College           | 614 (24.6%)           | 77 (36.8%)       |           |
| demo_race_hispanic:    |                       |                  | 0.080     |
| 0                      | 1970 (80.0%)          | 156 (74.6%)      |           |
| 1                      | 493 (20.0%)           | 53 (25.4%)       |           |

### Male participants

```
##          interview_age          bmi race.ethnicity.5level
##          0.19394814      0.29925725      0.19394814
##          household.income      high.educ      demo_race_hispanic
```

## 0.05039636 0.05393549 0.61967474

## -----Summary descriptives table by 'is\_outlier\_any'-----

|                        | not outlier<br>N=2664 | outlier<br>N=260 | p.overall |
|------------------------|-----------------------|------------------|-----------|
| interview_age          | 119 (7.47)            | 119 (7.56)       | 0.129     |
| bmi                    | 18.6 (3.67)           | 18.9 (4.11)      | 0.249     |
| race.ethnicity.5level: |                       |                  | 0.098     |
| Asian                  | 58 (2.20%)            | 7 (2.72%)        |           |
| Black                  | 376 (14.3%)           | 46 (17.9%)       |           |
| Mixed                  | 313 (11.9%)           | 38 (14.8%)       |           |
| Other                  | 123 (4.67%)           | 16 (6.23%)       |           |
| White                  | 1765 (67.0%)          | 150 (58.4%)      |           |
| household.income:      |                       |                  | 0.008     |
| [<5K]                  | 83 (3.37%)            | 11 (4.60%)       |           |
| [>=200K]               | 285 (11.6%)           | 30 (12.6%)       |           |
| [100K-200K]            | 787 (31.9%)           | 76 (31.8%)       |           |
| [12K-16K]              | 61 (2.47%)            | 4 (1.67%)        |           |
| [16K-25K]              | 116 (4.70%)           | 22 (9.21%)       |           |
| [25K-35K]              | 143 (5.80%)           | 9 (3.77%)        |           |
| [35K-50K]              | 206 (8.35%)           | 15 (6.28%)       |           |
| [50K-75K]              | 351 (14.2%)           | 36 (15.1%)       |           |
| [5K-12K]               | 78 (3.16%)            | 14 (5.86%)       |           |
| [75K-100K]             | 356 (14.4%)           | 22 (9.21%)       |           |
| high.educ:             |                       |                  | 0.018     |
| < HS Diploma           | 102 (3.83%)           | 17 (6.54%)       |           |
| Bachelor               | 734 (27.6%)           | 60 (23.1%)       |           |
| HS Diploma/GED         | 232 (8.72%)           | 29 (11.2%)       |           |
| Post Graduate Degree   | 904 (34.0%)           | 74 (28.5%)       |           |
| Some College           | 688 (25.9%)           | 80 (30.8%)       |           |
| demo_race_hispanic:    |                       |                  | 0.620     |
| 0                      | 2109 (80.1%)          | 198 (78.6%)      |           |
| 1                      | 524 (19.9%)           | 54 (21.4%)       |           |
