# Supplementary material for: Reward sensitivity and internalizing symptoms during the transition to puberty: An examination of 9-and 10-year-olds in the ABCD Study
Source: PubMed Central journal article supplement (PMC9649995; doi:10.1016/j.dcn.2022.101172), 2022-10-31
Supplement: mmc2.pdf [file mmc2.pdf]

# Supplement B

Reward sensitivity and internalizing symptoms during the transition to puberty: An examination of 9- and 10-year-olds in the ABCD Study.

## Contents

|                                                          |          |
|----------------------------------------------------------|----------|
| <b>Results for Sample 2</b>                              | <b>9</b> |
| <b>1—Internalizing-Puberty—</b>                          | <b>9</b> |
| 1.1 Model: CBCL internalizing factor ~ PDS               | 9        |
| Female participants                                      | 9        |
| Male participants                                        | 9        |
| 1.2 Model: CBCL Anxious-Depressed ~ PDS                  | 10       |
| Female participants                                      | 10       |
| Male participants                                        | 11       |
| 1.3 Model: CBCL Withdrawn-Depressed ~ PDS                | 12       |
| Female participants                                      | 12       |
| Male participants                                        | 12       |
| 1.4 Model: CBCL Depressed DSM-5 ~ PDS                    | 13       |
| Female participants                                      | 13       |
| Male participants                                        | 14       |
| 1.5 Model: CBCL internalizing factor ~ Pubertal category | 14       |
| Female participants                                      | 14       |
| Male participants                                        | 15       |
| 1.6 Model: CBCL Anxious-Depressed ~ Pubertal category    | 16       |
| Female participants                                      | 16       |
| Male participants                                        | 17       |
| 1.7 Model: CBCL Withdrawn-Depressed ~ Pubertal category  | 18       |
| Female participants                                      | 18       |
| Male participants                                        | 18       |
| 1.8 Model: CBCL Depressed DSM-5 ~ Pubertal category      | 19       |
| Female participants                                      | 19       |
| Male participants                                        | 20       |

|                                                                                    |    |
|------------------------------------------------------------------------------------|----|
| 1.9 Model: CBCL internalizing factor ~ Testosterone . . . . .                      | 21 |
| Female participants . . . . .                                                      | 21 |
| Male participants . . . . .                                                        | 22 |
| 1.10 Model: CBCL Anxious-Depressed ~ Testosterone . . . . .                        | 22 |
| Female participants . . . . .                                                      | 22 |
| Male participants . . . . .                                                        | 23 |
| 1.11 Model: CBCL Withdrawn-Depressed ~ Testosterone . . . . .                      | 24 |
| Female participants . . . . .                                                      | 24 |
| Male participants . . . . .                                                        | 24 |
| 1.12 Model: CBCL Depressed DSM-5 ~ Testosterone . . . . .                          | 25 |
| Female participants . . . . .                                                      | 25 |
| Male participants . . . . .                                                        | 26 |
| 1.13 Model: CBCL internalizing factor ~ Testosterone + PDS . . . . .               | 27 |
| Female participants . . . . .                                                      | 27 |
| Male participants . . . . .                                                        | 27 |
| 1.14 Model: CBCL internalizing factor ~ Testosterone + Pubertal category . . . . . | 28 |
| Female participants . . . . .                                                      | 28 |
| Male participants . . . . .                                                        | 29 |
| 1.15 Model: CBCL Anxious-Depressed ~ Testosterone + PDS . . . . .                  | 30 |
| Female participants . . . . .                                                      | 30 |
| Male participants . . . . .                                                        | 30 |
| 1.16 Model: CBCL Anxious-Depressed ~ Testosterone + Pubertal category . . . . .    | 31 |
| Female participants . . . . .                                                      | 31 |
| Male participants . . . . .                                                        | 32 |
| 1.17 Model: CBCL Withdrawn-Depressed ~ Testosterone + PDS . . . . .                | 33 |
| Female participants . . . . .                                                      | 33 |
| Male participants . . . . .                                                        | 34 |
| 1.18 Model: CBCL Withdrawn-Depressed ~ Testosterone + Pubertal category . . . . .  | 34 |
| Female participants . . . . .                                                      | 34 |
| Male participants . . . . .                                                        | 35 |
| 1.19 Model: CBCL Depressed DSM-5 ~ Testosterone + PDS . . . . .                    | 36 |
| Female participants . . . . .                                                      | 36 |
| Male participants . . . . .                                                        | 37 |
| 1.20 Model: CBCL Depressed DSM-5 ~ Testosterone + Pubertal category . . . . .      | 38 |
| Female participants . . . . .                                                      | 38 |
| Male participants . . . . .                                                        | 38 |

|                                                             |           |
|-------------------------------------------------------------|-----------|
| <b>2—Reward~Puberty—</b>                                    | <b>40</b> |
| 2.1 Model: BIS-BAS-RR ~ PDS . . . . .                       | 40        |
| Female participants . . . . .                               | 40        |
| Male participants . . . . .                                 | 40        |
| 2.2 Model : Reaction Time ~ PDS . . . . .                   | 41        |
| Female participants . . . . .                               | 41        |
| Male participants . . . . .                                 | 42        |
| 2.3 Model: Caudate Anticipation ~ PDS . . . . .             | 42        |
| Female participants . . . . .                               | 42        |
| Male participants . . . . .                                 | 43        |
| 2.4 Model B: Putamen Anticipation ~ PDS . . . . .           | 43        |
| Female participants . . . . .                               | 43        |
| Male participants . . . . .                                 | 44        |
| 2.5 Model: Accumbens Anticipation ~ PDS . . . . .           | 44        |
| Female participants . . . . .                               | 44        |
| Male participants . . . . .                                 | 45        |
| 2.6 Model: Caudate Feedback ~ PDS . . . . .                 | 45        |
| Female participants . . . . .                               | 45        |
| Male participants . . . . .                                 | 46        |
| 2.7 Model: Putamen Feedback ~ PDS . . . . .                 | 46        |
| Female participants . . . . .                               | 46        |
| Male participants . . . . .                                 | 47        |
| 2.8 Model: Accumbens Feedback ~ PDS . . . . .               | 47        |
| Female participants . . . . .                               | 47        |
| Male participants . . . . .                                 | 48        |
| 2.9 Model: OFC Anticipation ~ PDS . . . . .                 | 48        |
| Female participants . . . . .                               | 48        |
| Male participants . . . . .                                 | 49        |
| 2.10 Model: OFC Feedback ~ PDS . . . . .                    | 50        |
| Female participants . . . . .                               | 50        |
| Male participants . . . . .                                 | 51        |
| 2.11 Model: Caudate Anticipation ~ Testosterone . . . . .   | 52        |
| Female participants . . . . .                               | 52        |
| Male participants . . . . .                                 | 52        |
| 2.12 Model B: Putamen Anticipation ~ Testosterone . . . . . | 53        |
| Female participants . . . . .                               | 53        |

|                                                                                                  |           |
|--------------------------------------------------------------------------------------------------|-----------|
| Male participants . . . . .                                                                      | 53        |
| 2.13 Model: Accumbens Anticipation ~ Testosterone . . . . .                                      | 54        |
| Female participants . . . . .                                                                    | 54        |
| Male participants . . . . .                                                                      | 54        |
| 2.14 Model: Caudate Feedback ~ Testosterone . . . . .                                            | 55        |
| Female participants . . . . .                                                                    | 55        |
| Male participants . . . . .                                                                      | 55        |
| 2.15 Model: Putamen Feedback ~ Testosterone . . . . .                                            | 56        |
| Female participants . . . . .                                                                    | 56        |
| Male participants . . . . .                                                                      | 56        |
| 2.16 Model: Accumbens Feedback ~ Testosterone . . . . .                                          | 57        |
| Female participants . . . . .                                                                    | 57        |
| Male participants . . . . .                                                                      | 57        |
| 2.17 Model: OFC Anticipation ~ Testosterone . . . . .                                            | 58        |
| Female participants . . . . .                                                                    | 58        |
| Male participants . . . . .                                                                      | 59        |
| 2.18 Model: OFC Feedback ~ Testosterone . . . . .                                                | 60        |
| Female participants . . . . .                                                                    | 60        |
| Male participants . . . . .                                                                      | 60        |
| 2.19 Model: MID Reaction Time ~ Testosterone . . . . .                                           | 61        |
| Female participants . . . . .                                                                    | 61        |
| Male participants . . . . .                                                                      | 62        |
| 2.20 Model: BIS-BAS-RR ~ Testosterone . . . . .                                                  | 63        |
| Female participants . . . . .                                                                    | 63        |
| Male participants . . . . .                                                                      | 64        |
| <b>3—Internalizing~Reward—</b>                                                                   | <b>65</b> |
| 3.1 Model: CBCL internalizing factor ~ Nucleus Accumbens activity (anticipation stage) . . . . . | 65        |
| Female participants . . . . .                                                                    | 65        |
| Male participants . . . . .                                                                      | 65        |
| 3.2 Model: CBCL internalizing factor ~ Caudate activity (anticipation stage) . . . . .           | 66        |
| Female participants . . . . .                                                                    | 66        |
| Male participants . . . . .                                                                      | 66        |
| 3.3 Model: CBCL internalizing factor ~ Putamen activity (anticipation stage) . . . . .           | 67        |
| Female participants . . . . .                                                                    | 67        |
| Male participants . . . . .                                                                      | 67        |
| 3.4 Model: CBCL internalizing factor ~ Accumbens activity (feedback stage) . . . . .             | 68        |

|                                                                                                  |           |
|--------------------------------------------------------------------------------------------------|-----------|
| Female participants . . . . .                                                                    | 68        |
| Male participants . . . . .                                                                      | 68        |
| 3.5 Model: CBCL internalizing factor ~ Caudate activity (feedback stage) . . . . .               | 69        |
| Female participants . . . . .                                                                    | 69        |
| Male participants . . . . .                                                                      | 69        |
| 3.6 Model: CBCL internalizing factor ~ Putamen activity (feedback stage) . . . . .               | 70        |
| Female participants . . . . .                                                                    | 70        |
| Male participants . . . . .                                                                      | 70        |
| 3.7 Model: CBCL internalizing factor ~ OFC activity (anticipation stage) . . . . .               | 71        |
| Female participants . . . . .                                                                    | 71        |
| Male participants . . . . .                                                                      | 72        |
| 3.8 Model: CBCL internalizing factor ~ OFC activity (feedback stage) . . . . .                   | 73        |
| Female participants . . . . .                                                                    | 73        |
| Male participants . . . . .                                                                      | 74        |
| 3.9 Model: CBCL internalizing factor ~ BIS-BAS-RR . . . . .                                      | 74        |
| Female participants . . . . .                                                                    | 74        |
| Male participants . . . . .                                                                      | 75        |
| 3.10 Model: CBCL internalizing factor ~ MID Reaction Time . . . . .                              | 75        |
| Female participants . . . . .                                                                    | 75        |
| Male participants . . . . .                                                                      | 76        |
| <b>4—Internalizing~Puberty x Reward—</b>                                                         | <b>78</b> |
| 4.1 Model: CBCL internalizing factor ~ PDS x Accumbens activity (anticipation stage) . . . . .   | 78        |
| Female participants . . . . .                                                                    | 78        |
| Male participants . . . . .                                                                      | 78        |
| 4.2 Model: CBCL internalizing factor ~ PDS x Caudate activity (anticipation stage) . . . . .     | 79        |
| Female participants . . . . .                                                                    | 79        |
| Male participants . . . . .                                                                      | 80        |
| 4.3 Model: CBCL internalizing factor ~ PDS x Putamen activity (anticipation stage) . . . . .     | 81        |
| Female participants . . . . .                                                                    | 81        |
| Male participants . . . . .                                                                      | 82        |
| 4.4 Model: CBCL internalizing factor ~ PDS x Lateral OFC activity (anticipation stage) . . . . . | 82        |
| Female participants . . . . .                                                                    | 82        |
| Male participants . . . . .                                                                      | 83        |
| 4.5 Model: CBCL internalizing factor ~ PDS x Medial OFC activity (anticipation stage) . . . . .  | 84        |
| Female participants . . . . .                                                                    | 84        |
| Male participants . . . . .                                                                      | 85        |

|                                                                                                      |     |
|------------------------------------------------------------------------------------------------------|-----|
| 4.6 Model: CBCL internalizing factor ~ PDS x Accumbens activity (feedback)                           | 86  |
| Female participants                                                                                  | 86  |
| Male participants                                                                                    | 87  |
| 4.7 Model: CBCL internalizing factor ~ PDS x Caudate activity (feedback)                             | 88  |
| Female participants                                                                                  | 88  |
| Male participants                                                                                    | 88  |
| 4.8 Model: CBCL internalizing factor ~ PDS x Putamen activity (feedback)                             | 89  |
| Female participants                                                                                  | 89  |
| Male participants                                                                                    | 90  |
| 4.9 Model: CBCL internalizing factor ~ PDS x Lateral OFC activity (feedback stage)                   | 91  |
| Female participants                                                                                  | 91  |
| Male participants                                                                                    | 92  |
| 4.10 Model: CBCL internalizing factor ~ PDS x Medial OFC activity (feedback stage)                   | 92  |
| Female participants                                                                                  | 92  |
| Male participants                                                                                    | 93  |
| 4.11 Model: CBCL internalizing factor ~ PDS x BIS-BAS                                                | 94  |
| Female participants                                                                                  | 94  |
| Male participants                                                                                    | 95  |
| 4.12 Model: CBCL internalizing factor ~ PDS x MID reaction time (large reward vs. neutral)           | 96  |
| Female participants                                                                                  | 96  |
| Male participants                                                                                    | 96  |
| 4.13 Model: CBCL internalizing factor ~ PDS x MID reaction time (large vs. small reward)             | 97  |
| Female participants                                                                                  | 97  |
| Male participants                                                                                    | 98  |
| 4.14 Model: CBCL internalizing factor ~ Testosterone x Accumbens activity (anticipation stage) + PDS | 99  |
| Female participants                                                                                  | 99  |
| Male participants                                                                                    | 100 |
| 4.15 Model: CBCL internalizing factor ~ Testosterone x Caudate activity (anticipation stage) + PDS   | 101 |
| Female participants                                                                                  | 101 |
| Male participants                                                                                    | 102 |
| 4.16 Model: CBCL internalizing factor ~ Testosterone x Putamen activity (anticipation stage) + PDS   | 103 |
| Female participants                                                                                  | 103 |
| Male participants                                                                                    | 104 |
| 4.17 Model: CBCL internalizing factor ~ Testosterone x Accumbens activity (feedback stage) + PDS     | 105 |
| Female participants                                                                                  | 105 |

|                                                                                                                     |            |
|---------------------------------------------------------------------------------------------------------------------|------------|
| Male participants . . . . .                                                                                         | 106        |
| 4.18 Model: CBCL internalizing factor ~ Testosterone x Caudate activity (Feedback stage) + PDS                      | 108        |
| Female participants . . . . .                                                                                       | 108        |
| Male participants . . . . .                                                                                         | 109        |
| 4.19 Model: CBCL internalizing factor ~ Testosterone x Putamen activity (Feedback stage) + PDS                      | 110        |
| Female participants . . . . .                                                                                       | 110        |
| Male participants . . . . .                                                                                         | 111        |
| 4.20 Model: CBCL internalizing factor ~ Testosterone x Lateral OFC activity (anticipation stage) + PDS . . . . .    | 112        |
| Female participants . . . . .                                                                                       | 112        |
| Male participants . . . . .                                                                                         | 113        |
| 4.21 Model: CBCL internalizing factor ~ Testosterone x Medial OFC activity (anticipation stage) + PDS . . . . .     | 114        |
| Female participants . . . . .                                                                                       | 114        |
| Male participants . . . . .                                                                                         | 114        |
| 4.22 Model: CBCL internalizing factor ~ Testosterone x Lateral OFC activity (feedback stage) + PDS . . . . .        | 115        |
| Female participants . . . . .                                                                                       | 115        |
| Male participants . . . . .                                                                                         | 116        |
| 4.23 Model: CBCL internalizing factor ~ Testosterone x Medial OFC activity (feedback stage) + PDS . . . . .         | 117        |
| Female participants . . . . .                                                                                       | 117        |
| Male participants . . . . .                                                                                         | 119        |
| 4.24 Model: CBCL internalizing factor ~ Testosterone x BIS-BAS RR + PDS . . . . .                                   | 120        |
| Female participants . . . . .                                                                                       | 120        |
| Male participants . . . . .                                                                                         | 121        |
| 4.25 Model: CBCL internalizing factor ~ Testosterone x MID Reaction Time + PDS (large reward vs. neutral) . . . . . | 122        |
| Female participants . . . . .                                                                                       | 122        |
| Male participants . . . . .                                                                                         | 123        |
| 4.26 Model: CBCL internalizing factor ~ Testosterone x MID Reaction Time + PDS (large vs. small reward) . . . . .   | 124        |
| Female participants . . . . .                                                                                       | 124        |
| Male participants . . . . .                                                                                         | 125        |
| <b>5— Correlation Matrix —</b>                                                                                      | <b>128</b> |
| Female participants . . . . .                                                                                       | 128        |
| Male participants . . . . .                                                                                         | 129        |

|                                                                       |            |
|-----------------------------------------------------------------------|------------|
| <b>6— Compare Outliers to Non-Outliers on Demographic Variables —</b> | <b>130</b> |
| Female participants . . . . .                                         | 130        |
| Male participants . . . . .                                           | 130        |



## Results for Sample 2

### 1—Internalizing~Puberty—

#### 1.1 Model: CBCL internalizing factor ~ PDS

##### Female participants

```
##
## Family: gaussian
## Link function: identity
##
## Formula:
## cbcl_scr_syn_internal_r ~ PDS_score + race.ethnicity.5level +
##   interview_age + demo_race_hispanic
##
## Parametric coefficients:
##               Estimate Std. Error t value Pr(>|t|)
## (Intercept)    1.00435    1.81456   0.553  0.5800
## PDS_score       0.78180    0.15854   4.931 8.69e-07 ***
## race.ethnicity.5levelBlack -0.25319    0.71823  -0.353  0.7245
## race.ethnicity.5levelMixed  1.22839    0.71864   1.709  0.0875 .
## race.ethnicity.5levelOther  0.39856    0.82932   0.481  0.6309
## race.ethnicity.5levelWhite  0.99113    0.66629   1.488  0.1370
## interview_age    0.01562    0.01471   1.062  0.2885
## demo_race_hispanic1  0.25310    0.32178   0.787  0.4316
## ---
## Signif. codes:  0 '***' 0.001 '**' 0.01 '*' 0.05 '.' 0.1 ' ' 1
##
##
## R-sq.(adj) =  0.0128
## lmer.REML = 16187  Scale est. = 17.323  n = 2620

##               stdcoef      stdse
## X(Intercept)    0.00000000 0.00000000
## XPDS_score      0.10536577 0.02136725
## Xrace.ethnicity.5levelBlack -0.01733433 0.04917261
## Xrace.ethnicity.5levelMixed  0.07387880 0.04322130
## Xrace.ethnicity.5levelOther  0.01604117 0.03337861
## Xrace.ethnicity.5levelWhite  0.08799336 0.05915374
## Xinterview_age   0.02151197 0.02026243
## Xdemo_race_hispanic1 0.01832534 0.02329731
```

##### Male participants

```
##
## Family: gaussian
## Link function: identity
##
## Formula:
## cbcl_scr_syn_internal_r ~ PDS_score + race.ethnicity.5level +
##   interview_age + demo_race_hispanic
```

```

##
## Parametric coefficients:
##               Estimate Std. Error t value Pr(>|t|)
## (Intercept)      3.058782   1.842397   1.660 0.096982 .
## PDS_score         0.672276   0.198546   3.386 0.000719 ***
## race.ethnicity.5levelBlack -0.831114   0.792617  -1.049 0.294466
## race.ethnicity.5levelMixed  0.427434   0.788949   0.542 0.588015
## race.ethnicity.5levelOther -0.893416   0.887818  -1.006 0.314355
## race.ethnicity.5levelWhite -0.061289   0.738629  -0.083 0.933876
## interview_age     0.009474   0.014107   0.672 0.501897
## demo_race_hispanic1  0.621208   0.322430   1.927 0.054124 .
## ---
## Signif. codes:  0 '***' 0.001 '**' 0.01 '*' 0.05 '.' 0.1 ' ' 1
##
##
## R-sq.(adj) =  0.00579
## lmer.REML = 17729  Scale est. = 17.104    n = 2832

##               stdcoef      stdse
## X(Intercept)      0.00000000 0.00000000
## XPDS_score        0.06632796 0.01958892
## Xrace.ethnicity.5levelBlack -0.05010210 0.04778137
## Xrace.ethnicity.5levelMixed  0.02476863 0.04571739
## Xrace.ethnicity.5levelOther -0.03540337 0.03518153
## Xrace.ethnicity.5levelWhite -0.00511654 0.06166235
## Xinterview_age     0.01269154 0.01889762
## Xdemo_race_hispanic1  0.04420342 0.02294319

```

## 1.2 Model: CBCL Anxious-Depressed ~ PDS

### Female participants

```

##
## Family: gaussian
## Link function: identity
##
## Formula:
## cbcl_scr_syn_anxdep_r ~ PDS_score + race.ethnicity.5level + interview_age +
##   demo_race_hispanic
##
## Parametric coefficients:
##               Estimate Std. Error t value Pr(>|t|)
## (Intercept)      1.108103   1.010173   1.097 0.272767
## PDS_score         0.327885   0.088132   3.720 0.000203 ***
## race.ethnicity.5levelBlack -0.296592   0.397328  -0.746 0.455452
## race.ethnicity.5levelMixed  0.756457   0.398018   1.901 0.057470 .
## race.ethnicity.5levelOther  0.204912   0.459613   0.446 0.655753
## race.ethnicity.5levelWhite  0.584367   0.368865   1.584 0.113262
## interview_age     0.003237   0.008208   0.394 0.693331
## demo_race_hispanic1  0.074772   0.177107   0.422 0.672924
## ---
## Signif. codes:  0 '***' 0.001 '**' 0.01 '*' 0.05 '.' 0.1 ' ' 1
##

```

```
##
## R-sq.(adj) = 0.0128
## lmer.REML = 13136 Scale est. = 6.6266 n = 2620
```

```
##                stdcoef      stdse
## X(Intercept)      0.00000000 0.00000000
## XPDS_score        0.079555971 0.02138383
## Xrace.ethnicity.5levelBlack -0.036556917 0.04897321
## Xrace.ethnicity.5levelMixed 0.081906281 0.04309585
## Xrace.ethnicity.5levelOther 0.014847825 0.03330340
## Xrace.ethnicity.5levelWhite 0.093401575 0.05895699
## Xinterview_age    0.008028059 0.02035606
## Xdemo_race_hispanic1 0.009746320 0.02308537
```

### Male participants

```
##
## Family: gaussian
## Link function: identity
##
## Formula:
## cbcl_scr_syn_anxdep_r ~ PDS_score + race.ethnicity.5level + interview_age +
##      demo_race_hispanic
##
```

```
## Parametric coefficients:
##                Estimate Std. Error t value Pr(>|t|)
## (Intercept)      2.678399   1.026431   2.609 0.00912 **
## PDS_score         0.287407   0.110522   2.600 0.00936 **
## race.ethnicity.5levelBlack -0.369943   0.438408  -0.844 0.39883
## race.ethnicity.5levelMixed 0.350066   0.436534   0.802 0.42267
## race.ethnicity.5levelOther -0.229707   0.492277  -0.467 0.64081
## race.ethnicity.5levelWhite 0.242988   0.408759   0.594 0.55226
## interview_age    -0.006203   0.007875  -0.788 0.43094
## demo_race_hispanic1 0.260989   0.177342   1.472 0.14122
```

```
## ---
## Signif. codes:  0 '***' 0.001 '**' 0.01 '*' 0.05 '.' 0.1 ' ' 1
```

```
##
##
## R-sq.(adj) = 0.0047
## lmer.REML = 14428 Scale est. = 7.0594 n = 2832
```

```
##                stdcoef      stdse
## X(Intercept)      0.00000000 0.00000000
## XPDS_score        0.05122276 0.01969765
## Xrace.ethnicity.5levelBlack -0.04028538 0.04774088
## Xrace.ethnicity.5levelMixed 0.03664369 0.04569493
## Xrace.ethnicity.5levelOther -0.01644307 0.03523852
## Xrace.ethnicity.5levelWhite 0.03664339 0.06164226
## Xinterview_age    -0.01501059 0.01905650
## Xdemo_race_hispanic1 0.03354727 0.02279537
```

### 1.3 Model: CBCL Withdrawn-Depressed ~ PDS

#### Female participants

```
##
## Family: gaussian
## Link function: identity
##
## Formula:
## cbcl_scr_syn_withdep_r ~ PDS_score + race.ethnicity.5level +
##   interview_age + demo_race_hispanic
##
## Parametric coefficients:
##               Estimate Std. Error t value Pr(>|t|)
## (Intercept)    0.264236   0.542461   0.487   0.626
## PDS_score      0.222482   0.047112   4.722 2.45e-06 ***
## race.ethnicity.5levelBlack -0.192139   0.212400  -0.905   0.366
## race.ethnicity.5levelMixed -0.016699   0.212612  -0.079   0.937
## race.ethnicity.5levelOther -0.052069   0.245382  -0.212   0.832
## race.ethnicity.5levelWhite -0.104268   0.197265  -0.529   0.597
## interview_age   0.003147   0.004407   0.714   0.475
## demo_race_hispanic1 0.155883   0.094464   1.650   0.099 .
## ---
## Signif. codes:  0 '***' 0.001 '**' 0.01 '*' 0.05 '.' 0.1 ' ' 1
##
##
## R-sq.(adj) =  0.01
## lmer.REML = 9892.2  Scale est. = 2.4029    n = 2620

##               stdcoef      stdse
## X(Intercept)    0.000000000 0.000000000
## XPDS_score      0.100765118 0.02133740
## Xrace.ethnicity.5levelBlack -0.044206830 0.04886834
## Xrace.ethnicity.5levelMixed -0.003375126 0.04297178
## Xrace.ethnicity.5levelOther -0.007042721 0.03318966
## Xrace.ethnicity.5levelWhite -0.031108702 0.05885468
## Xinterview_age   0.014566340 0.02040275
## Xdemo_race_hispanic1 0.037928350 0.02298439
```

#### Male participants

```
##
## Family: gaussian
## Link function: identity
##
## Formula:
## cbcl_scr_syn_withdep_r ~ PDS_score + race.ethnicity.5level +
##   interview_age + demo_race_hispanic
##
## Parametric coefficients:
##               Estimate Std. Error t value Pr(>|t|)
## (Intercept)   -0.063981   0.606166  -0.106   0.9159
## PDS_score      0.186135   0.065463   2.843   0.0045 **
```

```

## race.ethnicity.5levelBlack -0.182782  0.259995  -0.703  0.4821
## race.ethnicity.5levelMixed -0.013421  0.259142  -0.052  0.9587
## race.ethnicity.5levelOther -0.212504  0.292036  -0.728  0.4669
## race.ethnicity.5levelWhite -0.237451  0.242533  -0.979  0.3276
## interview_age              0.009317  0.004651   2.003  0.0452 *
## demo_race_hispanic1        0.134507  0.104104   1.292  0.1964
## ---
## Signif. codes:  0 '***' 0.001 '**' 0.01 '*' 0.05 '.' 0.1 ' ' 1
##
##
## R-sq.(adj) =  0.00457
## lmer.REML = 11461  Scale est. = 2.0684    n = 2832

##                stdcoef      stdse
## X(Intercept)      0.000000000 0.00000000
## XPDS_score        0.056067558 0.01971859
## Xrace.ethnicity.5levelBlack -0.033640575 0.04785127
## Xrace.ethnicity.5levelMixed -0.002374361 0.04584625
## Xrace.ethnicity.5levelOther -0.025709394 0.03533144
## Xrace.ethnicity.5levelWhite -0.060520311 0.06181563
## Xinterview_age    0.038105692 0.01902161
## Xdemo_race_hispanic1 0.029221142 0.02261626

```

## 1.4 Model: CBCL Depressed DSM-5 ~ PDS

### Female participants

```

##
## Family: gaussian
## Link function: identity
##
## Formula:
## cbcl_scr_dsm5_depress_r ~ PDS_score + race.ethnicity.5level +
##   interview_age + demo_race_hispanic
##
## Parametric coefficients:
##                Estimate Std. Error t value Pr(>|t|)
## (Intercept)      0.877508  0.632006   1.388  0.16512
## PDS_score         0.192397  0.055287   3.480  0.00051 ***
## race.ethnicity.5levelBlack -0.076952  0.249336  -0.309  0.75763
## race.ethnicity.5levelMixed  0.219642  0.249929   0.879  0.37958
## race.ethnicity.5levelOther  0.024488  0.288648   0.085  0.93240
## race.ethnicity.5levelWhite  0.128716  0.231475   0.556  0.57821
## interview_age    -0.001469  0.005136  -0.286  0.77490
## demo_race_hispanic1  0.126429  0.111105   1.138  0.25525
## ---
## Signif. codes:  0 '***' 0.001 '**' 0.01 '*' 0.05 '.' 0.1 ' ' 1
##
##
## R-sq.(adj) =  0.0042
## lmer.REML = 10689  Scale est. = 2.2893    n = 2620

##                stdcoef      stdse

```

```

## X(Intercept)          0.00000000 0.00000000
## XPDS_score           0.075023445 0.02155878
## Xrace.ethnicity.5levelBlack -0.015243330 0.04939042
## Xrace.ethnicity.5levelMixed 0.038220433 0.04349083
## Xrace.ethnicity.5levelOther 0.002851615 0.03361339
## Xrace.ethnicity.5levelWhite 0.033063515 0.05945922
## Xinterview_age       -0.005854702 0.02047123
## Xdemo_race_hispanic1 0.026484767 0.02327452

```

## Male participants

```

##
## Family: gaussian
## Link function: identity
##
## Formula:
## cbcl_scr_dsm5_depress_r ~ PDS_score + race.ethnicity.5level +
##   interview_age + demo_race_hispanic
##
## Parametric coefficients:
##              Estimate Std. Error t value Pr(>|t|)
## (Intercept)    0.291321   0.703319   0.414   0.679
## PDS_score      0.156004   0.075919   2.055   0.040 *
## race.ethnicity.5levelBlack -0.050116   0.302313  -0.166   0.868
## race.ethnicity.5levelMixed 0.186032   0.301170   0.618   0.537
## race.ethnicity.5levelOther -0.269981   0.339141  -0.796   0.426
## race.ethnicity.5levelWhite -0.039717   0.281893  -0.141   0.888
## interview_age  0.007343   0.005392   1.362   0.173
## demo_race_hispanic1 0.151825   0.121806   1.246   0.213
## ---
## Signif. codes:  0 '***' 0.001 '**' 0.01 '*' 0.05 '.' 0.1 ' ' 1
##
##
## R-sq.(adj) = 0.00245
## lmer.REML = 12298 Scale est. = 2.5816 n = 2832

##              stdcoef      stdse
## X(Intercept)    0.00000000 0.00000000
## XPDS_score      0.040516619 0.01971730
## Xrace.ethnicity.5levelBlack -0.007952833 0.04797349
## Xrace.ethnicity.5levelMixed 0.028377226 0.04594033
## Xrace.ethnicity.5levelOther -0.028162680 0.03537701
## Xrace.ethnicity.5levelWhite -0.008728164 0.06194806
## Xinterview_age  0.025893531 0.01901349
## Xdemo_race_hispanic1 0.028438914 0.02281585

```

## 1.5 Model: CBCL internalizing factor ~ Pubertal category

### Female participants

```

##
## Family: gaussian

```

```

## Link function: identity
##
## Formula:
## cbcl_scr_syn_internal_r ~ pds_p_ss_category + race.ethnicity.5level +
##   interview_age + demo_race_hispanic
##
## Parametric coefficients:
##               Estimate Std. Error t value Pr(>|t|)
## (Intercept)      1.29818    1.86143   0.697 0.485610
## pds_p_ss_categoryEarly  0.30134    0.28987   1.040 0.298645
## pds_p_ss_categoryLate   0.78997    0.69372   1.139 0.254914
## pds_p_ss_categoryMid    0.99238    0.26806   3.702 0.000218 ***
## race.ethnicity.5levelBlack -0.12030    0.71934  -0.167 0.867198
## race.ethnicity.5levelMixed  1.25918    0.72006   1.749 0.080456 .
## race.ethnicity.5levelOther  0.42346    0.83096   0.510 0.610371
## race.ethnicity.5levelWhite  1.00589    0.66757   1.507 0.131986
## interview_age          0.01957    0.01499   1.305 0.191958
## demo_race_hispanic1     0.19558    0.32298   0.606 0.544867
## ---
## Signif. codes:  0 '***' 0.001 '**' 0.01 '*' 0.05 '.' 0.1 ' ' 1
##
##
## R-sq.(adj) =  0.0091
## lmer.REML = 16196  Scale est. = 17.558    n = 2620

##               stdcoef      stdse
## X(Intercept)      0.000000000 0.000000000
## Xpds_p_ss_categoryEarly  0.023342057 0.02245401
## Xpds_p_ss_categoryLate   0.023360730 0.02051446
## Xpds_p_ss_categoryMid    0.090723632 0.02450653
## Xrace.ethnicity.5levelBlack -0.008236061 0.04924855
## Xrace.ethnicity.5levelMixed  0.075730420 0.04330612
## Xrace.ethnicity.5levelOther  0.017043625 0.03344477
## Xrace.ethnicity.5levelWhite  0.089303475 0.05926738
## Xinterview_age          0.026952773 0.02065116
## Xdemo_race_hispanic1     0.014160288 0.02338424

```

## Male participants

```

##
## Family: gaussian
## Link function: identity
##
## Formula:
## cbcl_scr_syn_internal_r ~ pds_p_ss_category + race.ethnicity.5level +
##   interview_age + demo_race_hispanic
##
## Parametric coefficients:
##               Estimate Std. Error t value Pr(>|t|)
## (Intercept)      3.31718    1.84808   1.795  0.0728 .
## pds_p_ss_categoryEarly  0.54750    0.25778   2.124  0.0338 *
## pds_p_ss_categoryLate   0.13707    1.51153   0.091  0.9278
## pds_p_ss_categoryMid    1.15909    0.47569   2.437  0.0149 *

```

```

## race.ethnicity.5levelBlack -0.72574    0.79246  -0.916   0.3599
## race.ethnicity.5levelMixed  0.50254    0.79001   0.636   0.5248
## race.ethnicity.5levelOther -0.86211    0.88860  -0.970   0.3320
## race.ethnicity.5levelWhite  0.03352    0.73983   0.045   0.9639
## interview_age                0.01255    0.01405   0.893   0.3718
## demo_race_hispanic1         0.59764    0.32348   1.848   0.0648 .
## ---
## Signif. codes:  0 '***' 0.001 '**' 0.01 '*' 0.05 '.' 0.1 ' ' 1
##
##
## R-sq.(adj) =  0.00411
## lmer.REML = 17728  Scale est. = 17.081    n = 2832

##                stdcoef    stdse
## X(Intercept)      0.00000000 0.00000000
## Xpds_p_ss_categoryEarly  0.040995710 0.01930197
## Xpds_p_ss_categoryLate   0.001711736 0.01887643
## Xpds_p_ss_categoryMid    0.047789864 0.01961283
## Xrace.ethnicity.5levelBlack -0.043749661 0.04777213
## Xrace.ethnicity.5levelMixed  0.029120905 0.04577898
## Xrace.ethnicity.5levelOther -0.034162882 0.03521257
## Xrace.ethnicity.5levelWhite  0.002798263 0.06176302
## Xinterview_age         0.016806689 0.01881649
## Xdemo_race_hispanic1     0.042526084 0.02301773

```

## 1.6 Model: CBCL Anxious-Depressed ~ Pubertal category

### Female participants

```

##
## Family: gaussian
## Link function: identity
##
## Formula:
## cbcl_scr_syn_anxdep_r ~ pds_p_ss_category + race.ethnicity.5level +
##   interview_age + demo_race_hispanic
##
## Parametric coefficients:
##                Estimate Std. Error t value Pr(>|t|)
## (Intercept)      1.119072   1.035379   1.081  0.27987
## pds_p_ss_categoryEarly  0.197344   0.161806   1.220  0.22272
## pds_p_ss_categoryLate   0.160095   0.387250   0.413  0.67934
## pds_p_ss_categoryMid    0.389693   0.149135   2.613  0.00903 **
## race.ethnicity.5levelBlack -0.212867   0.397768  -0.535  0.59259
## race.ethnicity.5levelMixed  0.774922   0.398616   1.944  0.05200 .
## race.ethnicity.5levelOther  0.218712   0.460309   0.475  0.63473
## race.ethnicity.5levelWhite  0.592456   0.369390   1.604  0.10886
## interview_age         0.005779   0.008357   0.692  0.48925
## demo_race_hispanic1     0.054532   0.177675   0.307  0.75893
## ---
## Signif. codes:  0 '***' 0.001 '**' 0.01 '*' 0.05 '.' 0.1 ' ' 1
##
##

```



```
## R-sq.(adj) = 0.0101
## lmer.REML = 13144 Scale est. = 6.6835 n = 2620
```

```
##                stdcoef      stdse
## X(Intercept)      0.00000000 0.00000000
## Xpds_p_ss_categoryEarly 0.027520492 0.02256461
## Xpds_p_ss_categoryLate 0.008523245 0.02061669
## Xpds_p_ss_categoryMid 0.064138031 0.02454552
## Xrace.ethnicity.5levelBlack -0.026237284 0.04902741
## Xrace.ethnicity.5levelMixed 0.083905616 0.04316057
## Xrace.ethnicity.5levelOther 0.015847778 0.03335384
## Xrace.ethnicity.5levelWhite 0.094694419 0.05904098
## Xinterview_age 0.014332455 0.02072361
## Xdemo_race_hispanic1 0.007108148 0.02315944
```

### Male participants

```
##
## Family: gaussian
## Link function: identity
##
## Formula:
## cbcl_scr_syn_anxdep_r ~ pds_p_ss_category + race.ethnicity.5level +
##   interview_age + demo_race_hispanic
##
## Parametric coefficients:
##              Estimate Std. Error t value Pr(>|t|)
## (Intercept) 2.764965 1.029599 2.685 0.00729 **
## pds_p_ss_categoryEarly 0.195421 0.143528 1.362 0.17345
## pds_p_ss_categoryLate -0.136256 0.838804 -0.162 0.87097
## pds_p_ss_categoryMid 0.442853 0.264922 1.672 0.09471 .
## race.ethnicity.5levelBlack -0.309604 0.438351 -0.706 0.48006
## race.ethnicity.5levelMixed 0.380709 0.437135 0.871 0.38387
## race.ethnicity.5levelOther -0.214669 0.492713 -0.436 0.66310
## race.ethnicity.5levelWhite 0.279504 0.409448 0.683 0.49489
## interview_age -0.004581 0.007842 -0.584 0.55915
## demo_race_hispanic1 0.255484 0.177953 1.436 0.15120
## ---
## Signif. codes: 0 '***' 0.001 '**' 0.01 '*' 0.05 '.' 0.1 ' ' 1
##
##
## R-sq.(adj) = 0.00298
## lmer.REML = 14429 Scale est. = 7.0618 n = 2832
```

```
##                stdcoef      stdse
## X(Intercept)      0.00000000 0.00000000
## Xpds_p_ss_categoryEarly 0.026432601 0.01941367
## Xpds_p_ss_categoryLate -0.003073796 0.01892258
## Xpds_p_ss_categoryMid 0.032983362 0.01973118
## Xrace.ethnicity.5levelBlack -0.033714706 0.04773467
## Xrace.ethnicity.5levelMixed 0.039851301 0.04575777
## Xrace.ethnicity.5levelOther -0.015366542 0.03526972
## Xrace.ethnicity.5levelWhite 0.042150174 0.06174615
```

```
## Xinterview_age          -0.011085451 0.01897652
## Xdemo_race_hispanic1    0.032839759 0.02287397
```

## 1.7 Model: CBCL Withdrawn-Depressed ~ Pubertal category

### Female participants

```
##
## Family: gaussian
## Link function: identity
##
## Formula:
## cbcl_scr_syn_withdep_r ~ pds_p_ss_category + race.ethnicity.5level +
##   interview_age + demo_race_hispanic
##
## Parametric coefficients:
##              Estimate Std. Error t value Pr(>|t|)
## (Intercept)    0.418975   0.555757   0.754 0.450988
## pds_p_ss_categoryEarly  0.032612   0.086804   0.376 0.707168
## pds_p_ss_categoryLate   0.459686   0.207547   2.215 0.026856 *
## pds_p_ss_categoryMid    0.273222   0.079746   3.426 0.000622 ***
## race.ethnicity.5levelBlack -0.169202   0.212645  -0.796 0.426277
## race.ethnicity.5levelMixed -0.008629   0.212914  -0.041 0.967677
## race.ethnicity.5levelOther -0.045437   0.245728  -0.185 0.853315
## race.ethnicity.5levelWhite -0.098009   0.197526  -0.496 0.619808
## interview_age         0.003771   0.004484   0.841 0.400526
## demo_race_hispanic1    0.136455   0.094750   1.440 0.149941
## ---
## Signif. codes:  0 '***' 0.001 '**' 0.01 '*' 0.05 '.' 0.1 ' ' 1
##
##
## R-sq.(adj) =  0.0074
## lmer.REML = 9902.1  Scale est. = 2.4201    n = 2620

##              stdcoef      stdse
## X(Intercept)    0.000000000 0.000000000
## Xpds_p_ss_categoryEarly  0.008489447 0.02259618
## Xpds_p_ss_categoryLate   0.045682796 0.02062564
## Xpds_p_ss_categoryMid    0.083940423 0.02450006
## Xrace.ethnicity.5levelBlack -0.038929485 0.04892469
## Xrace.ethnicity.5levelMixed -0.001743948 0.04303298
## Xrace.ethnicity.5levelOther -0.006145691 0.03323642
## Xrace.ethnicity.5levelWhite -0.029241264 0.05893250
## Xinterview_age         0.017454233 0.02075860
## Xdemo_race_hispanic1    0.033201312 0.02305382
```

### Male participants

```
##
## Family: gaussian
## Link function: identity
##
```

```

## Formula:
## cbcl_scr_syn_withdep_r ~ pds_p_ss_category + race.ethnicity.5level +
##   interview_age + demo_race_hispanic
##
## Parametric coefficients:
##               Estimate Std. Error t value Pr(>|t|)
## (Intercept)      0.002449   0.607574   0.004  0.99678
## pds_p_ss_categoryEarly  0.132614   0.084929   1.561  0.11852
## pds_p_ss_categoryLate -0.238035   0.497191  -0.479  0.63215
## pds_p_ss_categoryMid   0.424294   0.156786   2.706  0.00685 **
## race.ethnicity.5levelBlack -0.153780   0.259695  -0.592  0.55379
## race.ethnicity.5levelMixed  0.015170   0.259260   0.059  0.95334
## race.ethnicity.5levelOther -0.201211   0.292061  -0.689  0.49092
## race.ethnicity.5levelWhite -0.204065   0.242712  -0.841  0.40055
## interview_age         0.010167   0.004628   2.197  0.02812 *
## demo_race_hispanic1    0.124921   0.104271   1.198  0.23100
## ---
## Signif. codes:  0 '***' 0.001 '**' 0.01 '*' 0.05 '.' 0.1 ' ' 1
##
##
## R-sq.(adj) =  0.00455
## lmer.REML = 11462  Scale est. = 2.08      n = 2832

##               stdcoef      stdse
## X(Intercept)      0.000000000  0.000000000
## Xpds_p_ss_categoryEarly  0.030316362  0.01941525
## Xpds_p_ss_categoryLate  -0.009075646  0.01895656
## Xpds_p_ss_categoryMid   0.053409545  0.01973607
## Xrace.ethnicity.5levelBlack -0.028302694  0.04779604
## Xrace.ethnicity.5levelMixed  0.002683858  0.04586724
## Xrace.ethnicity.5levelOther -0.024343057  0.03533440
## Xrace.ethnicity.5levelWhite -0.052011083  0.06186126
## Xinterview_age         0.041582389  0.01892964
## Xdemo_race_hispanic1    0.027138523  0.02265241

```

## 1.8 Model: CBCL Depressed DSM-5 ~ Pubertal category

### Female participants

```

##
## Family: gaussian
## Link function: identity
##
## Formula:
## cbcl_scr_dsm5_depress_r ~ pds_p_ss_category + race.ethnicity.5level +
##   interview_age + demo_race_hispanic
##
## Parametric coefficients:
##               Estimate Std. Error t value Pr(>|t|)
## (Intercept)      0.9682718   0.6476525   1.495  0.1350
## pds_p_ss_categoryEarly  0.0097474   0.1012280   0.096  0.9233
## pds_p_ss_categoryLate  0.3158399   0.2422368   1.304  0.1924
## pds_p_ss_categoryMid   0.2210179   0.0934547   2.365  0.0181 *

```

```

## race.ethnicity.5levelBlack -0.0494567 0.2494354 -0.198 0.8428
## race.ethnicity.5levelMixed 0.2280100 0.2501254 0.912 0.3621
## race.ethnicity.5levelOther 0.0302076 0.2888797 0.105 0.9167
## race.ethnicity.5levelWhite 0.1336232 0.2316532 0.577 0.5641
## interview_age -0.0004703 0.0052282 -0.090 0.9283
## demo_race_hispanic1 0.1124883 0.1114040 1.010 0.3127
## ---
## Signif. codes: 0 '***' 0.001 '**' 0.01 '*' 0.05 '.' 0.1 ' ' 1
##
##
## R-sq.(adj) = 0.00221
## lmer.REML = 10696 Scale est. = 2.3302 n = 2620

```

```

##
##
##          stdcoef      stdse
## X(Intercept)          0.00000000 0.00000000
## Xpds_p_ss_categoryEarly 0.002184582 0.02268725
## Xpds_p_ss_categoryLate 0.027023568 0.02072602
## Xpds_p_ss_categoryMid 0.058461203 0.02471961
## Xrace.ethnicity.5levelBlack -0.009796763 0.04941006
## Xrace.ethnicity.5levelMixed 0.039676615 0.04352497
## Xrace.ethnicity.5levelOther 0.003517710 0.03364039
## Xrace.ethnicity.5levelWhite 0.034323985 0.05950510
## Xinterview_age -0.001874298 0.02083728
## Xdemo_race_hispanic1 0.023564393 0.02333726

```

## Male participants

```

##
## Family: gaussian
## Link function: identity
##
## Formula:
## cbcl_scr_dsm5_depress_r ~ pds_p_ss_category + race.ethnicity.5level +
##   interview_age + demo_race_hispanic
##
## Parametric coefficients:
##
##          Estimate Std. Error t value Pr(>|t|)
## (Intercept)      0.379548  0.705032  0.538  0.5904
## pds_p_ss_categoryEarly 0.203805  0.098498  2.069  0.0386 *
## pds_p_ss_categoryLate 0.094555  0.577287  0.164  0.8699
## pds_p_ss_categoryMid 0.227129  0.181808  1.249  0.2117
## race.ethnicity.5levelBlack -0.033577  0.302044 -0.111  0.9115
## race.ethnicity.5levelMixed 0.197296  0.301372  0.655  0.5127
## race.ethnicity.5levelOther -0.265054  0.339220 -0.781  0.4347
## race.ethnicity.5levelWhite -0.018670  0.282163 -0.066  0.9473
## interview_age      0.007708  0.005366  1.437  0.1509
## demo_race_hispanic1 0.145882  0.122109  1.195  0.2323
## ---
## Signif. codes: 0 '***' 0.001 '**' 0.01 '*' 0.05 '.' 0.1 ' ' 1
##
##
## R-sq.(adj) = 0.00193
## lmer.REML = 12297 Scale est. = 2.5799 n = 2832

```

```

##                stdcoef      stdse
## X(Intercept)      0.00000000 0.00000000
## Xpds_p_ss_categoryEarly 0.040171335 0.01941470
## Xpds_p_ss_categoryLate 0.003108413 0.01897773
## Xpds_p_ss_categoryMid 0.024651380 0.01973246
## Xrace.ethnicity.5levelBlack -0.005328331 0.04793089
## Xrace.ethnicity.5levelMixed 0.030095476 0.04597119
## Xrace.ethnicity.5levelOther -0.027648749 0.03538519
## Xrace.ethnicity.5levelWhite -0.004102781 0.06200735
## Xinterview_age      0.027182214 0.01892126
## Xdemo_race_hispanic1 0.027325654 0.02287254

```

## 1.9 Model: CBCL internalizing factor ~ Testosterone

### Female participants

```

##
## Family: gaussian
## Link function: identity
##
## Formula:
## cbcl_scr_syn_internal_r ~ hormone_scr_ert_mean + race.ethnicity.5level +
##   interview_age + demo_race_hispanic
##
## Parametric coefficients:
##                Estimate Std. Error t value Pr(>|t|)
## (Intercept)      -0.855385   1.866170  -0.458  0.64673
## hormone_scr_ert_mean 0.006203   0.007005   0.886  0.37597
## race.ethnicity.5levelBlack 0.064913   0.725607   0.089  0.92872
## race.ethnicity.5levelMixed 1.367192   0.731022   1.870  0.06157 .
## race.ethnicity.5levelOther 0.392609   0.848930   0.462  0.64378
## race.ethnicity.5levelWhite 1.077302   0.675310   1.595  0.11078
## interview_age      0.039194   0.015051   2.604  0.00927 **
## demo_race_hispanic1 0.175791   0.333089   0.528  0.59771
## ---
## Signif. codes:  0 '***' 0.001 '**' 0.01 '*' 0.05 '.' 0.1 ' ' 1
##
##
## R-sq.(adj) = 0.0054
## lmer.REML = 14907 Scale est. = 17.56 n = 2409
##
##                stdcoef      stdse
## X(Intercept)      0.00000000 0.00000000
## Xhormone_scr_ert_mean 0.018821998 0.02125552
## Xrace.ethnicity.5levelBlack 0.004344118 0.04855950
## Xrace.ethnicity.5levelMixed 0.082458636 0.04408970
## Xrace.ethnicity.5levelOther 0.015908467 0.03439852
## Xrace.ethnicity.5levelWhite 0.095357412 0.05977511
## Xinterview_age      0.054151770 0.02079507
## Xdemo_race_hispanic1 0.012768403 0.02419353

```

## Male participants

```
##
## Family: gaussian
## Link function: identity
##
## Formula:
## cbcl_scr_syn_internal_r ~ hormone_scr_ert_mean + race.ethnicity.5level +
##   interview_age + demo_race_hispanic
##
## Parametric coefficients:
##               Estimate Std. Error t value Pr(>|t|)
## (Intercept)      3.648782   1.877186   1.944   0.052 .
## hormone_scr_ert_mean  0.011484   0.007590   1.513   0.130
## race.ethnicity.5levelBlack -0.615060   0.810973  -0.758   0.448
## race.ethnicity.5levelMixed  0.293452   0.809804   0.362   0.717
## race.ethnicity.5levelOther -0.738635   0.909430  -0.812   0.417
## race.ethnicity.5levelWhite -0.014412   0.757886  -0.019   0.985
## interview_age      0.008913   0.014392   0.619   0.536
## demo_race_hispanic1  0.495960   0.331348   1.497   0.135
## ---
## Signif. codes:  0 '***' 0.001 '**' 0.01 '*' 0.05 '.' 0.1 ' ' 1
##
##
## R-sq.(adj) =  0.000756
## lmer.REML = 16412  Scale est. = 15.7      n = 2628

##               stdcoef      stdse
## X(Intercept)      0.000000000  0.000000000
## Xhormone_scr_ert_mean  0.030571712  0.02020498
## Xrace.ethnicity.5levelBlack -0.037009874  0.04879853
## Xrace.ethnicity.5levelMixed  0.017131855  0.04727670
## Xrace.ethnicity.5levelOther -0.029714884  0.03658585
## Xrace.ethnicity.5levelWhite -0.001211391  0.06370447
## Xinterview_age      0.012133185  0.01959314
## Xdemo_race_hispanic1  0.035693514  0.02384661
```

## 1.10 Model: CBCL Anxious-Depressed ~ Testosterone

### Female participants

```
##
## Family: gaussian
## Link function: identity
##
## Formula:
## cbcl_scr_syn_anxdep_r ~ hormone_scr_ert_mean + race.ethnicity.5level +
##   interview_age + demo_race_hispanic
##
## Parametric coefficients:
##               Estimate Std. Error t value Pr(>|t|)
## (Intercept)      0.174384   1.042465   0.167   0.8672
## hormone_scr_ert_mean  0.001262   0.003915   0.322   0.7473
```

```

## race.ethnicity.5levelBlack -0.114074 0.402044 -0.284 0.7766
## race.ethnicity.5levelMixed 0.830810 0.405722 2.048 0.0407 *
## race.ethnicity.5levelOther 0.225983 0.471554 0.479 0.6318
## race.ethnicity.5levelWhite 0.606919 0.374555 1.620 0.1053
## interview_age 0.014736 0.008431 1.748 0.0806 .
## demo_race_hispanic1 0.043874 0.183674 0.239 0.8112
## ---
## Signif. codes: 0 '***' 0.001 '**' 0.01 '*' 0.05 '.' 0.1 ' ' 1
##
##
## R-sq.(adj) = 0.00894
## lmer.REML = 12117 Scale est. = 6.9666 n = 2409

##
##
## stdcoef stdse
## X(Intercept) 0.000000000 0.000000000
## Xhormone_scr_ert_mean 0.006862752 0.02129425
## Xrace.ethnicity.5levelBlack -0.013682794 0.04822397
## Xrace.ethnicity.5levelMixed 0.089810070 0.04385830
## Xrace.ethnicity.5levelOther 0.016411942 0.03424651
## Xrace.ethnicity.5levelWhite 0.096286332 0.05942228
## Xinterview_age 0.036490707 0.02087801
## Xdemo_race_hispanic1 0.005711696 0.02391131

```

## Male participants

```

##
## Family: gaussian
## Link function: identity
##
## Formula:
## cbcl_scr_syn_anxdep_r ~ hormone_scr_ert_mean + race.ethnicity.5level +
##   interview_age + demo_race_hispanic
##
## Parametric coefficients:
##
## Estimate Std. Error t value Pr(>|t|)
## (Intercept) 3.012459 1.045526 2.881 0.00399 **
## hormone_scr_ert_mean 0.005946 0.004217 1.410 0.15861
## race.ethnicity.5levelBlack -0.287294 0.448509 -0.641 0.52187
## race.ethnicity.5levelMixed 0.269561 0.448124 0.602 0.54754
## race.ethnicity.5levelOther -0.135198 0.504418 -0.268 0.78870
## race.ethnicity.5levelWhite 0.289551 0.419374 0.690 0.48998
## interview_age -0.007605 0.008037 -0.946 0.34411
## demo_race_hispanic1 0.197889 0.182078 1.087 0.27721
## ---
## Signif. codes: 0 '***' 0.001 '**' 0.01 '*' 0.05 '.' 0.1 ' ' 1
##
##
## R-sq.(adj) = 0.0027
## lmer.REML = 13345 Scale est. = 6.4254 n = 2628

##
##
## stdcoef stdse
## X(Intercept) 0.000000000 0.000000000
## Xhormone_scr_ert_mean 0.006862752 0.02129425

```

```

## Xrace.ethnicity.5levelBlack -0.013682794 0.04822397
## Xrace.ethnicity.5levelMixed 0.089810070 0.04385830
## Xrace.ethnicity.5levelOther 0.016411942 0.03424651
## Xrace.ethnicity.5levelWhite 0.096286332 0.05942228
## Xinterview_age 0.036490707 0.02087801
## Xdemo_race_hispanic1 0.005711696 0.02391131

```

## 1.11 Model: CBCL Withdrawn-Depressed ~ Testosterone

### Female participants

```

##
## Family: gaussian
## Link function: identity
##
## Formula:
## cbcl_scr_syn_withdep_r ~ hormone_scr_ert_mean + race.ethnicity.5level +
##   interview_age + demo_race_hispanic
##
## Parametric coefficients:
##               Estimate Std. Error t value Pr(>|t|)
## (Intercept)   -0.049692  0.560922  -0.089  0.9294
## hormone_scr_ert_mean 0.004957  0.002102   2.358  0.0184 *
## race.ethnicity.5levelBlack -0.124909  0.215595  -0.579  0.5624
## race.ethnicity.5levelMixed 0.034579  0.217293   0.159  0.8736
## race.ethnicity.5levelOther -0.058102  0.252429  -0.230  0.8180
## race.ethnicity.5levelWhite -0.055997  0.200812  -0.279  0.7804
## interview_age 0.007040  0.004534   1.553  0.1207
## demo_race_hispanic1 0.159992  0.098448   1.625  0.1043
## ---
## Signif. codes:  0 '***' 0.001 '**' 0.01 '*' 0.05 '.' 0.1 ' ' 1
##
##
## R-sq.(adj) = 0.00293
## lmer.REML = 9138.4  Scale est. = 2.3918  n = 2409

##               stdcoef      stdse
## X(Intercept) 0.000000000 0.000000000
## Xhormone_scr_ert_mean 0.050354659 0.02135181
## Xrace.ethnicity.5levelBlack -0.027984173 0.04830116
## Xrace.ethnicity.5levelMixed 0.006981761 0.04387311
## Xrace.ethnicity.5levelOther -0.007881459 0.03424158
## Xrace.ethnicity.5levelWhite -0.016592972 0.05950501
## Xinterview_age 0.032560927 0.02097216
## Xdemo_race_hispanic1 0.038903013 0.02393831

```

### Male participants

```

##
## Family: gaussian
## Link function: identity
##

```



```

## Formula:
## cbcl_scr_syn_withdep_r ~ hormone_scr_ert_mean + race.ethnicity.5level +
##   interview_age + demo_race_hispanic
##
## Parametric coefficients:
##               Estimate Std. Error t value Pr(>|t|)
## (Intercept)    -0.065422   0.623459  -0.105   0.9164
## hormone_scr_ert_mean    0.005191   0.002515   2.064   0.0391 *
## race.ethnicity.5levelBlack -0.140493   0.267964  -0.524   0.6001
## race.ethnicity.5levelMixed -0.023699   0.268053  -0.088   0.9296
## race.ethnicity.5levelOther -0.148274   0.301637  -0.492   0.6231
## race.ethnicity.5levelWhite -0.217465   0.250758  -0.867   0.3859
## interview_age     0.010067   0.004796   2.099   0.0359 *
## demo_race_hispanic1  0.074814   0.107609   0.695   0.4870
## ---
## Signif. codes:  0 '***' 0.001 '**' 0.01 '*' 0.05 '.' 0.1 ' ' 1
##
##
## R-sq.(adj) =  0.00253
## lmer.REML = 10645  Scale est. = 2.0927    n = 2628

##               stdcoef      stdse
## X(Intercept)      0.000000000 0.000000000
## Xhormone_scr_ert_mean    0.041822222 0.02025883
## Xrace.ethnicity.5levelBlack -0.025584149 0.04879711
## Xrace.ethnicity.5levelMixed -0.004187139 0.04735916
## Xrace.ethnicity.5levelOther -0.018052062 0.03672361
## Xrace.ethnicity.5levelWhite -0.055318793 0.06378776
## Xinterview_age      0.041473358 0.01975713
## Xdemo_race_hispanic1  0.016294514 0.02343740

```

## 1.12 Model: CBCL Depressed DSM-5 ~ Testosterone

### Female participants

```

##
## Family: gaussian
## Link function: identity
##
## Formula:
## cbcl_scr_dsm5_depress_r ~ hormone_scr_ert_mean + race.ethnicity.5level +
##   interview_age + demo_race_hispanic
##
## Parametric coefficients:
##               Estimate Std. Error t value Pr(>|t|)
## (Intercept)    0.365180   0.652083   0.560   0.576
## hormone_scr_ert_mean    0.001599   0.002453   0.652   0.514
## race.ethnicity.5levelBlack 0.049492   0.252355   0.196   0.845
## race.ethnicity.5levelMixed 0.266956   0.254911   1.047   0.295
## race.ethnicity.5levelOther 0.068762   0.296312   0.232   0.817
## race.ethnicity.5levelWhite 0.187339   0.235156   0.797   0.426
## interview_age     0.004566   0.005274   0.866   0.387
## demo_race_hispanic1  0.105591   0.115240   0.916   0.360

```

```

##
##
## R-sq.(adj) = -0.000791
## lmer.REML = 9868.9  Scale est. = 2.3706    n = 2409

##                stdcoef      stdse
## X(Intercept)      0.00000000  0.00000000
## Xhormone_scr_ert_mean  0.013981172  0.02144398
## Xrace.ethnicity.5levelBlack 0.009544096  0.04866454
## Xrace.ethnicity.5levelMixed 0.046395261  0.04430183
## Xrace.ethnicity.5levelOther 0.008028701  0.03459752
## Xrace.ethnicity.5levelWhite 0.047783046  0.05997921
## Xinterview_age      0.018180288  0.02099824
## Xdemo_race_hispanic1  0.022099986  0.02411957

```

### Male participants

```

##
## Family: gaussian
## Link function: identity
##
## Formula:
## cbcl_scr_dsm5_depress_r ~ hormone_scr_ert_mean + race.ethnicity.5level +
##   interview_age + demo_race_hispanic
##
## Parametric coefficients:
##                Estimate Std. Error t value Pr(>|t|)
## (Intercept)      0.584252   0.716371   0.816   0.415
## hormone_scr_ert_mean  0.003873   0.002894   1.338   0.181
## race.ethnicity.5levelBlack -0.015288   0.309033  -0.049   0.961
## race.ethnicity.5levelMixed  0.122503   0.308904   0.397   0.692
## race.ethnicity.5levelOther -0.211947   0.347170  -0.610   0.542
## race.ethnicity.5levelWhite -0.045848   0.289020  -0.159   0.874
## interview_age      0.005727   0.005502   1.041   0.298
## demo_race_hispanic1  0.104462   0.125069   0.835   0.404
##
##
## R-sq.(adj) = -3.42e-06
## lmer.REML = 11370  Scale est. = 2.4163    n = 2628

##                stdcoef      stdse
## X(Intercept)      0.00000000  0.00000000
## Xhormone_scr_ert_mean  0.027139986  0.02027954
## Xrace.ethnicity.5levelBlack -0.002421329  0.04894377
## Xrace.ethnicity.5levelMixed  0.018823713  0.04746596
## Xrace.ethnicity.5levelOther -0.022442058  0.03676017
## Xrace.ethnicity.5levelWhite -0.010143182  0.06394185
## Xinterview_age      0.020522186  0.01971316
## Xdemo_race_hispanic1  0.019787604  0.02369111

```

## 1.13 Model: CBCL internalizing factor ~ Testosterone + PDS

### Female participants

```
##
## Family: gaussian
## Link function: identity
##
## Formula:
## cbcl_scr_syn_internal_r ~ hormone_scr_ert_mean + PDS_score +
##   race.ethnicity.5level + interview_age + demo_race_hispanic
##
## Parametric coefficients:
##               Estimate Std. Error t value Pr(>|t|)
## (Intercept)      0.342413   1.871973   0.183   0.855
## hormone_scr_ert_mean -0.001808   0.007142  -0.253   0.800
## PDS_score         0.858415   0.169573   5.062 4.46e-07 ***
## race.ethnicity.5levelBlack -0.448141   0.728585  -0.615   0.539
## race.ethnicity.5levelMixed  1.191085   0.727651   1.637   0.102
## race.ethnicity.5levelOther  0.282552   0.844386   0.335   0.738
## race.ethnicity.5levelWhite  0.995086   0.671704   1.481   0.139
## interview_age      0.020778   0.015411   1.348   0.178
## demo_race_hispanic1  0.163060   0.331259   0.492   0.623
## ---
## Signif. codes:  0 '***' 0.001 '**' 0.01 '*' 0.05 '.' 0.1 ' ' 1
##
##
## R-sq.(adj) =  0.0147
## lmer.REML = 14884  Scale est. = 17.835    n = 2409

##               stdcoef      stdse
## X(Intercept)      0.000000000 0.000000000
## Xhormone_scr_ert_mean -0.005485074 0.02167094
## XPDS_score         0.114295098 0.02257808
## Xrace.ethnicity.5levelBlack -0.029990779 0.04875878
## Xrace.ethnicity.5levelMixed  0.071837186 0.04388638
## Xrace.ethnicity.5levelOther  0.011448981 0.03421439
## Xrace.ethnicity.5levelWhite  0.088080090 0.05945593
## Xinterview_age      0.028708084 0.02129285
## Xdemo_race_hispanic1  0.011843695 0.02406062
```

### Male participants

```
##
## Family: gaussian
## Link function: identity
##
## Formula:
## cbcl_scr_syn_internal_r ~ hormone_scr_ert_mean + PDS_score +
##   race.ethnicity.5level + interview_age + demo_race_hispanic
##
## Parametric coefficients:
##               Estimate Std. Error t value Pr(>|t|)
```

```

## (Intercept)                3.601551    1.873001    1.923 0.054604 .
## hormone_scr_ert_mean       0.008530    0.007621    1.119 0.263134
## PDS_score                   0.722592    0.208138    3.472 0.000526 ***
## race.ethnicity.5levelBlack -0.920920    0.814194   -1.131 0.258124
## race.ethnicity.5levelMixed  0.265435    0.808196    0.328 0.742613
## race.ethnicity.5levelOther -0.774644    0.907628   -0.853 0.393470
## race.ethnicity.5levelWhite -0.011174    0.756320   -0.015 0.988213
## interview_age              0.002384    0.014484    0.165 0.869270
## demo_race_hispanic1       0.455845    0.330651    1.379 0.168127
## ---
## Signif. codes:  0 '***' 0.001 '**' 0.01 '*' 0.05 '.' 0.1 ' ' 1
##
##
## R-sq.(adj) =  0.00487
## lmer.REML = 16401  Scale est. = 15.567   n = 2628

##                                stdcoef      stdse
## X(Intercept)                   0.000000000 0.000000000
## Xhormone_scr_ert_mean           0.0227072479 0.02028781
## XPDS_score                      0.0708975056 0.02042158
## Xrace.ethnicity.5levelBlack    -0.0554143164 0.04899231
## Xrace.ethnicity.5levelMixed     0.0154962302 0.04718284
## Xrace.ethnicity.5levelOther    -0.0311634891 0.03651335
## Xrace.ethnicity.5levelWhite    -0.0009392334 0.06357280
## Xinterview_age                 0.0032456437 0.01971814
## Xdemo_race_hispanic1          0.0328064855 0.02379648

```

## 1.14 Model: CBCL internalizing factor ~ Testosterone + Pubertal category

### Female participants

```

##
## Family: gaussian
## Link function: identity
##
## Formula:
## cbcl_scr_syn_internal_r ~ hormone_scr_ert_mean + pds_p_ss_category +
##   race.ethnicity.5level + interview_age + demo_race_hispanic
##
## Parametric coefficients:
##              Estimate Std. Error t value Pr(>|t|)
## (Intercept)   0.8557681  1.9228693   0.445  0.6563
## hormone_scr_ert_mean 0.0003425  0.0071332   0.048  0.9617
## pds_p_ss_categoryEarly 0.3933989  0.3005232   1.309  0.1906
## pds_p_ss_categoryLate 0.8687929  0.7326478   1.186  0.2358
## pds_p_ss_categoryMid  1.1166251  0.2832008   3.943 8.28e-05 ***
## race.ethnicity.5levelBlack -0.3133195  0.7296392  -0.429  0.6677
## race.ethnicity.5levelMixed  1.2366700  0.7289531   1.697  0.0899 .
## race.ethnicity.5levelOther  0.3206729  0.8459695   0.379  0.7047
## race.ethnicity.5levelWhite  1.0239192  0.6728981   1.522  0.1282
## interview_age    0.0225179  0.0157527   1.429  0.1530
## demo_race_hispanic1 0.1015637  0.3326217   0.305  0.7601
## ---

```

```

## Signif. codes:  0 '***' 0.001 '**' 0.01 '*' 0.05 '.' 0.1 ' ' 1
##
##
## R-sq.(adj) =  0.0109
## lmer.REML = 14892  Scale est. = 18.205    n = 2409

##                stdcoef      stdse
## X(Intercept)      0.000000000 0.000000000
## Xhormone_scr_ert_mean 0.001039366 0.02164450
## Xpds_p_ss_categoryEarly 0.030669604 0.02342896
## Xpds_p_ss_categoryLate 0.025422800 0.02143889
## Xpds_p_ss_categoryMid 0.101942809 0.02585495
## Xrace.ethnicity.5levelBlack -0.020968151 0.04882934
## Xrace.ethnicity.5levelMixed 0.074586528 0.04396491
## Xrace.ethnicity.5levelOther 0.012993614 0.03427855
## Xrace.ethnicity.5levelWhite 0.090632263 0.05956161
## Xinterview_age      0.031111461 0.02176435
## Xdemo_race_hispanic1 0.007376971 0.02415962

```

### Male participants

```

##
## Family: gaussian
## Link function: identity
##
## Formula:
## cbcl_scr_syn_internal_r ~ hormone_scr_ert_mean + pds_p_ss_category +
##   race.ethnicity.5level + interview_age + demo_race_hispanic
##
## Parametric coefficients:
##                Estimate Std. Error t value Pr(>|t|)
## (Intercept)      3.948940   1.878350   2.102  0.0356 *
## hormone_scr_ert_mean 0.009780   0.007605   1.286  0.1986
## pds_p_ss_categoryEarly 0.584451   0.266802   2.191  0.0286 *
## pds_p_ss_categoryLate 1.751036   1.766389   0.991  0.3216
## pds_p_ss_categoryMid 1.087830   0.488954   2.225  0.0262 *
## race.ethnicity.5levelBlack -0.846385   0.814467  -1.039  0.2988
## race.ethnicity.5levelMixed 0.331370   0.809462   0.409  0.6823
## race.ethnicity.5levelOther -0.750826   0.908673  -0.826  0.4087
## race.ethnicity.5levelWhite 0.074787   0.757914   0.099  0.9214
## interview_age      0.004933   0.014448   0.341  0.7328
## demo_race_hispanic1 0.435394   0.331672   1.313  0.1894
## ---
## Signif. codes:  0 '***' 0.001 '**' 0.01 '*' 0.05 '.' 0.1 ' ' 1
##
##
## R-sq.(adj) =  0.00286
## lmer.REML = 16401  Scale est. = 15.602    n = 2628

##                stdcoef      stdse
## X(Intercept)      0.000000000 0.000000000
## Xhormone_scr_ert_mean 0.026036280 0.02024654
## Xpds_p_ss_categoryEarly 0.043938067 0.02005777

```

```

## Xpds_p_ss_categoryLate      0.019377781 0.01954768
## Xpds_p_ss_categoryMid      0.045360899 0.02038863
## Xrace.ethnicity.5levelBlack -0.050929352 0.04900877
## Xrace.ethnicity.5levelMixed 0.019345540 0.04725674
## Xrace.ethnicity.5levelOther -0.030205319 0.03655539
## Xrace.ethnicity.5levelWhite 0.006286281 0.06370685
## Xinterview_age             0.006715086 0.01966883
## Xdemo_race_hispanic1      0.031334668 0.02386994

```

## 1.15 Model: CBCL Anxious-Depressed ~ Testosterone + PDS

### Female participants

```

##
## Family: gaussian
## Link function: identity
##
## Formula:
## cbcl_scr_syn_anxdep_r ~ hormone_scr_ert_mean + PDS_score + race.ethnicity.5level +
##   interview_age + demo_race_hispanic
##
## Parametric coefficients:
##              Estimate Std. Error t value Pr(>|t|)
## (Intercept)   0.676640   1.047992   0.646 0.518566
## hormone_scr_ert_mean -0.002159   0.004003  -0.539 0.589733
## PDS_score      0.362799   0.094795   3.827 0.000133 ***
## race.ethnicity.5levelBlack -0.330779   0.404838  -0.817 0.413973
## race.ethnicity.5levelMixed 0.756457   0.404897   1.868 0.061846 .
## race.ethnicity.5levelOther 0.179155   0.470212   0.381 0.703230
## race.ethnicity.5levelWhite 0.571167   0.373553   1.529 0.126393
## interview_age   0.007008   0.008648   0.810 0.417827
## demo_race_hispanic1 0.037785   0.183185   0.206 0.836600
## ---
## Signif. codes:  0 '***' 0.001 '**' 0.01 '*' 0.05 '.' 0.1 ' ' 1
##
##
## R-sq.(adj) = 0.0135
## lmer.REML = 12105 Scale est. = 7.04      n = 2409

##              stdcoef      stdse
## X(Intercept)   0.000000000 0.000000000
## Xhormone_scr_ert_mean -0.011740483 0.02177005
## XPDS_score      0.086579092 0.02262213
## Xrace.ethnicity.5levelBlack -0.039675953 0.04855914
## Xrace.ethnicity.5levelMixed 0.081772589 0.04376916
## Xrace.ethnicity.5levelOther 0.013011072 0.03414898
## Xrace.ethnicity.5levelWhite 0.090614354 0.05926332
## Xinterview_age   0.017353886 0.02141566
## Xdemo_race_hispanic1 0.004918995 0.02384771

```

### Male participants

```
##
```

```

## Family: gaussian
## Link function: identity
##
## Formula:
## cbcl_scr_syn_anxdep_r ~ hormone_scr_ert_mean + PDS_score + race.ethnicity.5level +
##   interview_age + demo_race_hispanic
##
## Parametric coefficients:
##               Estimate Std. Error t value Pr(>|t|)
## (Intercept)      2.990092   1.044140   2.864  0.00422 **
## hormone_scr_ert_mean  0.004654   0.004237   1.098  0.27211
## PDS_score         0.318842   0.115988   2.749  0.00602 **
## race.ethnicity.5levelBlack -0.420398   0.450649  -0.933  0.35097
## race.ethnicity.5levelMixed  0.259189   0.447607   0.579  0.56260
## race.ethnicity.5levelOther -0.149350   0.503841  -0.296  0.76693
## race.ethnicity.5levelWhite  0.292767   0.418862   0.699  0.48464
## interview_age     -0.010489   0.008095  -1.296  0.19518
## demo_race_hispanic1  0.180108   0.181839   0.990  0.32203
## ---
## Signif. codes:  0 '***' 0.001 '**' 0.01 '*' 0.05 '.' 0.1 ' ' 1
##
##
## R-sq.(adj) =  0.00514
## lmer.REML = 13340  Scale est. = 6.3863   n = 2628

##               stdcoef      stdse
## X(Intercept)      0.00000000  0.00000000
## Xhormone_scr_ert_mean  0.02238912  0.02038267
## XPDS_score        0.05652857  0.02056393
## Xrace.ethnicity.5levelBlack -0.04571053  0.04899974
## Xrace.ethnicity.5levelMixed  0.02734255  0.04721928
## Xrace.ethnicity.5levelOther -0.01085685  0.03662631
## Xrace.ethnicity.5levelWhite  0.04446756  0.06361982
## Xinterview_age     -0.02580229  0.01991299
## Xdemo_race_hispanic1  0.02342232  0.02364749

```

## 1.16 Model: CBCL Anxious-Depressed ~ Testosterone + Pubertal category

### Female participants

```

##
## Family: gaussian
## Link function: identity
##
## Formula:
## cbcl_scr_syn_anxdep_r ~ hormone_scr_ert_mean + pds_p_ss_category +
##   race.ethnicity.5level + interview_age + demo_race_hispanic
##
## Parametric coefficients:
##               Estimate Std. Error t value Pr(>|t|)
## (Intercept)      0.7791112   1.0755659   0.724  0.4689
## hormone_scr_ert_mean -0.0008758   0.0039961  -0.219  0.8266
## pds_p_ss_categoryEarly  0.2297358   0.1685985   1.363  0.1731

```

```

## pds_p_ss_categoryLate      0.1807508  0.4105624  0.440  0.6598
## pds_p_ss_categoryMid      0.4386130  0.1584967  2.767  0.0057 **
## race.ethnicity.5levelBlack -0.2448288  0.4053385  -0.604  0.5459
## race.ethnicity.5levelMixed  0.7824490  0.4055146  1.930  0.0538 .
## race.ethnicity.5levelOther  0.1977192  0.4709500  0.420  0.6746
## race.ethnicity.5levelWhite  0.5875329  0.3741000  1.571  0.1164
## interview_age              0.0085612  0.0088298  0.970  0.3324
## demo_race_hispanic1       0.0180341  0.1839019  0.098  0.9219
## ---
## Signif. codes:  0 '***' 0.001 '**' 0.01 '*' 0.05 '.' 0.1 ' ' 1
##
##
## R-sq.(adj) =  0.0106
## lmer.REML = 12113  Scale est. = 7.0992    n = 2409

##                stdcoef      stdse
## X(Intercept)      0.000000000  0.000000000
## Xhormone_scr_ert_mean -0.004762800  0.02173286
## Xpds_p_ss_categoryEarly  0.032101135  0.02355838
## Xpds_p_ss_categoryLate  0.009479907  0.02153293
## Xpds_p_ss_categoryMid  0.071770738  0.02593500
## Xrace.ethnicity.5levelBlack -0.029366487  0.04861914
## Xrace.ethnicity.5levelMixed  0.084582275  0.04383589
## Xrace.ethnicity.5levelOther  0.014359298  0.03420261
## Xrace.ethnicity.5levelWhite  0.093210770  0.05935012
## Xinterview_age      0.021200376  0.02186544
## Xdemo_race_hispanic1  0.002347750  0.02394101

```

## Male participants

```

##
## Family: gaussian
## Link function: identity
##
## Formula:
## cbcl_scr_syn_anxdep_r ~ hormone_scr_ert_mean + pds_p_ss_category +
##   race.ethnicity.5level + interview_age + demo_race_hispanic
##
## Parametric coefficients:
##                Estimate Std. Error t value Pr(>|t|)
## (Intercept)      3.123291  1.047126  2.983  0.00288 **
## hormone_scr_ert_mean  0.005308  0.004229  1.255  0.20961
## pds_p_ss_categoryEarly  0.221117  0.148706  1.487  0.13715
## pds_p_ss_categoryLate  0.533178  0.980631  0.544  0.58669
## pds_p_ss_categoryMid  0.420430  0.272652  1.542  0.12319
## race.ethnicity.5levelBlack -0.371849  0.450855  -0.825  0.40958
## race.ethnicity.5levelMixed  0.285879  0.448350  0.638  0.52377
## race.ethnicity.5levelOther -0.137199  0.504456  -0.272  0.78566
## race.ethnicity.5levelWhite  0.325158  0.419795  0.775  0.43867
## interview_age      -0.009104  0.008075  -1.127  0.25966
## demo_race_hispanic1  0.174477  0.182433  0.956  0.33896
## ---
## Signif. codes:  0 '***' 0.001 '**' 0.01 '*' 0.05 '.' 0.1 ' ' 1

```



```

##
##
## R-sq.(adj) = 0.00299
## lmer.REML = 13342 Scale est. = 6.3973 n = 2628

##                stdcoef      stdse
## X(Intercept)    0.00000000 0.00000000
## Xhormone_scr_ert_mean 0.025532655 0.02034563
## Xpds_p_ss_categoryEarly 0.030037945 0.02020120
## Xpds_p_ss_categoryLate 0.010661950 0.01960967
## Xpds_p_ss_categoryMid 0.031678892 0.02054398
## Xrace.ethnicity.5levelBlack -0.040431698 0.04902215
## Xrace.ethnicity.5levelMixed 0.030158117 0.04729767
## Xrace.ethnicity.5levelOther -0.009973597 0.03667097
## Xrace.ethnicity.5levelWhite 0.049387357 0.06376149
## Xinterview_age -0.022395419 0.01986399
## Xdemo_race_hispanic1 0.022690107 0.02372475

```

## 1.17 Model: CBCL Withdrawn-Depressed ~ Testosterone + PDS

### Female participants

```

##
## Family: gaussian
## Link function: identity
##
## Formula:
## cbcl_scr_syn_withdep_r ~ hormone_scr_ert_mean + PDS_score + race.ethnicity.5level +
##   interview_age + demo_race_hispanic
##
## Parametric coefficients:
##              Estimate Std. Error t value Pr(>|t|)
## (Intercept)    0.264555  0.563083  0.470  0.639
## hormone_scr_ert_mean 0.002833  0.002147  1.320  0.187
## PDS_score      0.224695  0.050753  4.427 9.97e-06 ***
## race.ethnicity.5levelBlack -0.256632  0.216690 -1.184  0.236
## race.ethnicity.5levelMixed -0.008861  0.216562 -0.041  0.967
## race.ethnicity.5levelOther -0.085080  0.251403 -0.338  0.735
## race.ethnicity.5levelWhite -0.076689  0.199982 -0.383  0.701
## interview_age  0.002215  0.004646  0.477  0.634
## demo_race_hispanic1  0.157482  0.097957  1.608  0.108
## ---
## Signif. codes:  0 '***' 0.001 '**' 0.01 '*' 0.05 '.' 0.1 ' ' 1
##
##
## R-sq.(adj) = 0.0106
## lmer.REML = 9123 Scale est. = 2.4126 n = 2409

##                stdcoef      stdse
## X(Intercept)    0.00000000 0.00000000
## Xhormone_scr_ert_mean 0.02877887 0.02180940
## XPDS_score      0.10015423 0.02262238
## Xrace.ethnicity.5levelBlack -0.05749500 0.04854638

```

```

## Xrace.ethnicity.5levelMixed -0.00178920 0.04372541
## Xrace.ethnicity.5levelOther -0.01154097 0.03410240
## Xrace.ethnicity.5levelWhite -0.02272450 0.05925907
## Xinterview_age 0.01024400 0.02148717
## Xdemo_race_hispanic1 0.03829283 0.02381879

```

## Male participants

```

##
## Family: gaussian
## Link function: identity
##
## Formula:
## cbcl_scr_syn_withdep_r ~ hormone_scr_ert_mean + PDS_score + race.ethnicity.5level +
##   interview_age + demo_race_hispanic
##
## Parametric coefficients:
##               Estimate Std. Error t value Pr(>|t|)
## (Intercept)   -0.079207  0.622787  -0.127  0.8988
## hormone_scr_ert_mean  0.004486  0.002528   1.775  0.0760 .
## PDS_score       0.173144  0.069352   2.497  0.0126 *
## race.ethnicity.5levelBlack -0.213651  0.269371  -0.793  0.4278
## race.ethnicity.5levelMixed -0.030230  0.267826  -0.113  0.9101
## race.ethnicity.5levelOther -0.156291  0.301378  -0.519  0.6041
## race.ethnicity.5levelWhite -0.216493  0.250526  -0.864  0.3876
## interview_age    0.008521  0.004831   1.764  0.0779 .
## demo_race_hispanic1  0.064799  0.107499   0.603  0.5467
## ---
## Signif. codes:  0 '***' 0.001 '**' 0.01 '*' 0.05 '.' 0.1 ' ' 1
##
##
## R-sq.(adj) =  0.00437
## lmer.REML = 10642  Scale est. = 2.0749  n = 2628

##               stdcoef      stdse
## X(Intercept)  0.000000000 0.00000000
## Xhormone_scr_ert_mean  0.036143616 0.02036342
## XPDS_score      0.051411554 0.02059277
## Xrace.ethnicity.5levelBlack -0.038906454 0.04905326
## Xrace.ethnicity.5levelMixed -0.005341048 0.04731920
## Xrace.ethnicity.5levelOther -0.019028074 0.03669204
## Xrace.ethnicity.5levelWhite -0.055071465 0.06372869
## Xinterview_age  0.035105272 0.01990177
## Xdemo_race_hispanic1  0.014113375 0.02341326

```

## 1.18 Model: CBCL Withdrawn-Depressed ~ Testosterone + Pubertal category

### Female participants

```

##
## Family: gaussian
## Link function: identity

```

```

##
## Formula:
## cbcl_scr_syn_withdep_r ~ hormone_scr_ert_mean + pds_p_ss_category +
##   race.ethnicity.5level + interview_age + demo_race_hispanic
##
## Parametric coefficients:
##               Estimate Std. Error t value Pr(>|t|)
## (Intercept)      0.435598   0.577770   0.754  0.45097
## hormone_scr_ert_mean  0.003353   0.002144   1.564  0.11788
## pds_p_ss_categoryEarly  0.047294   0.090456   0.523  0.60113
## pds_p_ss_categoryLate  0.402736   0.219935   1.831  0.06720 .
## pds_p_ss_categoryMid   0.275000   0.084897   3.239  0.00122 **
## race.ethnicity.5levelBlack -0.231080   0.216989  -1.065  0.28701
## race.ethnicity.5levelMixed  0.003088   0.216906   0.014  0.98864
## race.ethnicity.5levelOther -0.073623   0.251809  -0.292  0.77002
## race.ethnicity.5levelWhite -0.067910   0.200279  -0.339  0.73458
## interview_age        0.002517   0.004742   0.531  0.59564
## demo_race_hispanic1   0.138990   0.098341   1.413  0.15768
## ---
## Signif. codes:  0 '***' 0.001 '**' 0.01 '*' 0.05 '.' 0.1 ' ' 1
##
##
## R-sq.(adj) =  0.00763
## lmer.REML =  9133  Scale est. = 2.4228    n = 2409

##               stdcoef      stdse
## X(Intercept)      0.0000000000 0.00000000
## Xhormone_scr_ert_mean  0.0340613151 0.02177411
## Xpds_p_ss_categoryEarly  0.0123432124 0.02360803
## Xpds_p_ss_categoryLate  0.0394524490 0.02154508
## Xpds_p_ss_categoryMid   0.0840480748 0.02594712
## Xrace.ethnicity.5levelBlack -0.0517703614 0.04861336
## Xrace.ethnicity.5levelMixed  0.0006235848 0.04379505
## Xrace.ethnicity.5levelOther -0.0099868739 0.03415742
## Xrace.ethnicity.5levelWhite -0.0201231413 0.05934696
## Xinterview_age        0.0116403786 0.02193215
## Xdemo_race_hispanic1   0.0337962441 0.02391227

```

## Male participants

```

##
## Family: gaussian
## Link function: identity
##
## Formula:
## cbcl_scr_syn_withdep_r ~ hormone_scr_ert_mean + pds_p_ss_category +
##   race.ethnicity.5level + interview_age + demo_race_hispanic
##
## Parametric coefficients:
##               Estimate Std. Error t value Pr(>|t|)
## (Intercept)      0.002986   0.624066   0.005  0.9962
## hormone_scr_ert_mean  0.004787   0.002521   1.899  0.0576 .
## pds_p_ss_categoryEarly  0.127215   0.088825   1.432  0.1522

```

```

## pds_p_ss_categoryLate      0.118407  0.586546  0.202  0.8400
## pds_p_ss_categoryMid      0.372296  0.162909  2.285  0.0224 *
## race.ethnicity.5levelBlack -0.198817  0.269245 -0.738  0.4603
## race.ethnicity.5levelMixed -0.006389  0.268040 -0.024  0.9810
## race.ethnicity.5levelOther -0.145859  0.301509 -0.484  0.6286
## race.ethnicity.5levelWhite -0.187780  0.250862 -0.749  0.4542
## interview_age              0.009077  0.004816  1.885  0.0596 .
## demo_race_hispanic1       0.055606  0.107682  0.516  0.6056
## ---
## Signif. codes:  0 '***' 0.001 '**' 0.01 '*' 0.05 '.' 0.1 ' ' 1
##
##
## R-sq.(adj) =  0.00392
## lmer.REML = 10642  Scale est. = 2.0842    n = 2628

##                                stdcoef      stdse
## X(Intercept)                   0.000000000  0.000000000
## Xhormone_scr_ert_mean           0.038570552  0.02030809
## Xpds_p_ss_categoryEarly         0.028943372  0.02020909
## Xpds_p_ss_categoryLate         0.003965544  0.01964390
## Xpds_p_ss_categoryMid          0.046981426  0.02055801
## Xrace.ethnicity.5levelBlack    -0.036205086  0.04903038
## Xrace.ethnicity.5levelMixed    -0.001128826  0.04735691
## Xrace.ethnicity.5levelOther    -0.017757995  0.03670804
## Xrace.ethnicity.5levelWhite    -0.047767508  0.06381431
## Xinterview_age                 0.037394131  0.01983951
## Xdemo_race_hispanic1          0.012110972  0.02345319

```

## 1.19 Model: CBCL Depressed DSM-5 ~ Testosterone + PDS

### Female participants

```

##
## Family: gaussian
## Link function: identity
##
## Formula:
## cbcl_scr_dsm5_depress_r ~ hormone_scr_ert_mean + PDS_score +
##   race.ethnicity.5level + interview_age + demo_race_hispanic
##
## Parametric coefficients:
##              Estimate Std. Error t value Pr(>|t|)
## (Intercept)   0.6460355  0.6558347   0.985 0.324695
## hormone_scr_ert_mean -0.0002827  0.0025083 -0.113 0.910280
## PDS_score      0.2031579  0.0595351   3.412 0.000655 ***
## race.ethnicity.5levelBlack -0.0729058  0.2543140 -0.287 0.774385
## race.ethnicity.5levelMixed  0.2254904  0.2546070  0.886 0.375900
## race.ethnicity.5levelOther  0.0420331  0.2957283  0.142 0.886986
## race.ethnicity.5levelWhite  0.1675795  0.2346831  0.714 0.475255
## interview_age   0.0002325  0.0054138  0.043 0.965748
## demo_race_hispanic1  0.1023451  0.1149749  0.890 0.373474
## ---
## Signif. codes:  0 '***' 0.001 '**' 0.01 '*' 0.05 '.' 0.1 ' ' 1

```

```
##
##
## R-sq.(adj) = 0.00332
## lmer.REML = 9861.1 Scale est. = 2.3708 n = 2409

##                stdcoef      stdse
## X(Intercept)      0.000000000 0.00000000
## Xhormone_scr_ert_mean -0.0024716722 0.02193189
## XPDS_score         0.0779455840 0.02284184
## Xrace.ethnicity.5levelBlack -0.0140592443 0.04904224
## Xrace.ethnicity.5levelMixed 0.0391888040 0.04424908
## Xrace.ethnicity.5levelOther 0.0049077939 0.03452931
## Xrace.ethnicity.5levelWhite 0.0427430404 0.05985856
## Xinterview_age     0.0009256356 0.02155368
## Xdemo_race_hispanic1 0.0214207060 0.02406411
```

### Male participants

```
##
## Family: gaussian
## Link function: identity
##
## Formula:
## cbcl_scr_dsm5_depress_r ~ hormone_scr_ert_mean + PDS_score +
##   race.ethnicity.5level + interview_age + demo_race_hispanic
##
## Parametric coefficients:
##              Estimate Std. Error t value Pr(>|t|)
## (Intercept)    0.571436   0.715750   0.798   0.425
## hormone_scr_ert_mean 0.003161   0.002910   1.086   0.277
## PDS_score       0.175141   0.079670   2.198   0.028 *
## race.ethnicity.5levelBlack -0.089073   0.310714  -0.287   0.774
## race.ethnicity.5levelMixed 0.115835   0.308718   0.375   0.708
## race.ethnicity.5levelOther -0.220547   0.346959  -0.636   0.525
## race.ethnicity.5levelWhite -0.045009   0.288819  -0.156   0.876
## interview_age    0.004156   0.005544   0.750   0.454
## demo_race_hispanic1 0.094639   0.124952   0.757   0.449
## ---
## Signif. codes:  0 '***' 0.001 '**' 0.01 '*' 0.05 '.' 0.1 ' ' 1
##
##
## R-sq.(adj) = 0.00146
## lmer.REML = 11369 Scale est. = 2.3989 n = 2628

##                stdcoef      stdse
## X(Intercept)      0.000000000 0.00000000
## Xhormone_scr_ert_mean 0.022150446 0.02038962
## XPDS_score         0.045229008 0.02057436
## Xrace.ethnicity.5levelBlack -0.014107184 0.04920999
## Xrace.ethnicity.5levelMixed 0.017799124 0.04743737
## Xrace.ethnicity.5levelOther -0.023352706 0.03673789
## Xrace.ethnicity.5levelWhite -0.009957701 0.06389749
## Xinterview_age     0.014890191 0.01986382
## Xdemo_race_hispanic1 0.017926843 0.02366887
```

## 1.20 Model: CBCL Depressed DSM-5 ~ Testosterone + Pubertal category

### Female participants

```
##
## Family: gaussian
## Link function: identity
##
## Formula:
## cbcl_scr_dsm5_depress_r ~ hormone_scr_ert_mean + pds_p_ss_category +
##   race.ethnicity.5level + interview_age + demo_race_hispanic
##
## Parametric coefficients:
##               Estimate Std. Error t value Pr(>|t|)
## (Intercept)    0.8106598  0.6728012   1.205  0.22836
## hormone_scr_ert_mean 0.0001381  0.0025021   0.055  0.95599
## pds_p_ss_categoryEarly 0.0492938  0.1055779   0.467  0.64062
## pds_p_ss_categoryLate 0.3461948  0.2572564   1.346  0.17852
## pds_p_ss_categoryMid 0.2601191  0.0993877   2.617  0.00892 **
## race.ethnicity.5levelBlack -0.0509616  0.2543593  -0.200  0.84122
## race.ethnicity.5levelMixed 0.2358067  0.2547330   0.926  0.35469
## race.ethnicity.5levelOther 0.0506706  0.2958991   0.171  0.86405
## race.ethnicity.5levelWhite 0.1747582  0.2347990   0.744  0.45677
## interview_age    0.0003926  0.0055252   0.071  0.94335
## demo_race_hispanic1 0.0859678  0.1153212   0.745  0.45606
## ---
## Signif. codes:  0 '***' 0.001 '**' 0.01 '*' 0.05 '.' 0.1 ' ' 1
##
##
## R-sq.(adj) = 0.00162
## lmer.REML = 9867.4  Scale est. = 2.4144    n = 2409

##               stdcoef      stdse
## X(Intercept)    0.00000000  0.00000000
## Xhormone_scr_ert_mean 0.001207347  0.02187747
## Xpds_p_ss_categoryEarly 0.011073755  0.02371787
## Xpds_p_ss_categoryLate 0.029191408  0.02169205
## Xpds_p_ss_categoryMid 0.068430362  0.02614623
## Xrace.ethnicity.5levelBlack -0.009827497  0.04905098
## Xrace.ethnicity.5levelMixed 0.040981716  0.04427098
## Xrace.ethnicity.5levelOther 0.005916315  0.03454926
## Xrace.ethnicity.5levelWhite 0.044574051  0.05988814
## Xinterview_age    0.001563179  0.02199701
## Xdemo_race_hispanic1 0.017992972  0.02413660
```

### Male participants

```
##
## Family: gaussian
## Link function: identity
##
## Formula:
## cbcl_scr_dsm5_depress_r ~ hormone_scr_ert_mean + pds_p_ss_category +
```

```

##      race.ethnicity.5level + interview_age + demo_race_hispanic
##
## Parametric coefficients:
##              Estimate Std. Error t value Pr(>|t|)
## (Intercept)      0.689735   0.717064   0.962   0.3362
## hormone_scr_ert_mean  0.003294   0.002901   1.135   0.2563
## pds_p_ss_categoryEarly  0.237818   0.102015   2.331   0.0198 *
## pds_p_ss_categoryLate   0.714641   0.674953   1.059   0.2898
## pds_p_ss_categoryMid    0.170315   0.187023   0.911   0.3626
## race.ethnicity.5levelBlack -0.078464   0.310538  -0.253   0.8005
## race.ethnicity.5levelMixed  0.122465   0.308923   0.396   0.6918
## race.ethnicity.5levelOther -0.219424   0.347043  -0.632   0.5273
## race.ethnicity.5levelWhite -0.027166   0.289168  -0.094   0.9252
## interview_age          0.004416   0.005525   0.799   0.4242
## demo_race_hispanic1    0.091051   0.125217   0.727   0.4672
## ---
## Signif. codes:  0 '***' 0.001 '**' 0.01 '*' 0.05 '.' 0.1 ' ' 1
##
##
## R-sq.(adj) =  0.00109
## lmer.REML = 11367  Scale est. = 2.3933   n = 2628

##              stdcoef      stdse
## X(Intercept)      0.000000000 0.000000000
## Xhormone_scr_ert_mean  0.023081528 0.02032942
## Xpds_p_ss_categoryEarly  0.047057475 0.02018586
## Xpds_p_ss_categoryLate   0.020815587 0.01965960
## Xpds_p_ss_categoryMid    0.018692446 0.02052616
## Xrace.ethnicity.5levelBlack -0.012426899 0.04918215
## Xrace.ethnicity.5levelMixed  0.018817879 0.04746887
## Xrace.ethnicity.5levelOther -0.023233793 0.03674676
## Xrace.ethnicity.5levelWhite -0.006010075 0.06397471
## Xinterview_age          0.015822566 0.01979495
## Xdemo_race_hispanic1    0.017247156 0.02371908

```

## 2—Reward~Puberty—

### 2.1 Model: BIS-BAS-RR ~ PDS

#### Female participants

```
##
## Family: gaussian
## Link function: identity
##
## Formula:
## bisbas_ss_basm_rr_z ~ PDS_score + interview_age
##
## Parametric coefficients:
##           Estimate Std. Error t value Pr(>|t|)
## (Intercept)  0.424883  0.314581  1.351  0.17693
## PDS_score    0.075275  0.028023  2.686  0.00727 **
## interview_age -0.005048  0.002715 -1.859  0.06310 .
## ---
## Signif. codes:  0 '***' 0.001 '**' 0.01 '*' 0.05 '.' 0.1 ' ' 1
##
##
## R-sq.(adj) =  0.00417
## lmer.REML = 7608.3  Scale est. = 0.75478  n = 2683

##           stdcoef      stdse
## X(Intercept)  0.00000000 0.00000000
## XPDS_score    0.05471457 0.02036890
## Xinterview_age -0.03751186 0.02017537
```

#### Male participants

```
##
## Family: gaussian
## Link function: identity
##
## Formula:
## bisbas_ss_basm_rr_z ~ PDS_score + interview_age
##
## Parametric coefficients:
##           Estimate Std. Error t value Pr(>|t|)
## (Intercept)  0.113914  0.286158  0.398  0.6906
## PDS_score    0.069981  0.032783  2.135  0.0329 *
## interview_age -0.001217  0.002418 -0.503  0.6147
## ---
## Signif. codes:  0 '***' 0.001 '**' 0.01 '*' 0.05 '.' 0.1 ' ' 1
##
##
## R-sq.(adj) =  0.00134
## lmer.REML = 8001.9  Scale est. = 0.72946  n = 2893

##           stdcoef      stdse
```



```
## X(Intercept)    0.000000000 0.000000000
## XPDS_score     0.040327184 0.01889153
## Xinterview_age -0.009502474 0.01887306
```

## 2.2 Model : Reaction Time ~ PDS

### Female participants

```
##
## Family: gaussian
## Link function: identity
##
## Formula:
## rt_diff_large_neutral_z ~ PDS_score + interview_age
##
## Parametric coefficients:
##           Estimate Std. Error t value Pr(>|t|)
## (Intercept) -0.632648  0.316922  -1.996  0.0460 *
## PDS_score    0.021223  0.028471   0.745  0.4561
## interview_age 0.005283  0.002744   1.925  0.0544 .
## ---
## Signif. codes:  0 '***' 0.001 '**' 0.01 '*' 0.05 '.' 0.1 ' ' 1
##
##
## R-sq.(adj) =  0.00148
## lmer.REML = 6029.4  Scale est. = 0.75407  n = 2239

##           stdcoef      stdse
## X(Intercept)  0.00000000 0.00000000
## XPDS_score    0.01641790 0.02202495
## Xinterview_age 0.04232813 0.02198917

##
## Family: gaussian
## Link function: identity
##
## Formula:
## rt_diff_large_small_z ~ PDS_score + interview_age
##
## Parametric coefficients:
##           Estimate Std. Error t value Pr(>|t|)
## (Intercept) -5.279e-01  3.315e-01  -1.592  0.111
## PDS_score    -1.774e-06  2.985e-02   0.000  1.000
## interview_age  4.523e-03  2.868e-03   1.577  0.115
##
##
## R-sq.(adj) =  0.000326
## lmer.REML = 6207.2  Scale est. = 0.83565  n = 2239

##           stdcoef      stdse
## X(Intercept)  0.000000e+00 0.00000000
## XPDS_score    -1.319351e-06 0.02220433
## Xinterview_age  3.484188e-02 0.02209669
```

## Male participants

```
##
## Family: gaussian
## Link function: identity
##
## Formula:
## rt_diff_large_neutral_z ~ PDS_score + interview_age
##
## Parametric coefficients:
##           Estimate Std. Error t value Pr(>|t|)
## (Intercept) -0.592862  0.301862  -1.964  0.0496 *
## PDS_score    -0.054721  0.035667  -1.534  0.1251
## interview_age  0.005403  0.002552   2.117  0.0344 *
## ---
## Signif. codes:  0 '***' 0.001 '**' 0.01 '*' 0.05 '.' 0.1 ' ' 1
##
##
## R-sq.(adj) =  0.00176
## lmer.REML = 6169.8  Scale est. = 0.84509  n = 2304

##           stdcoef      stdse
## X(Intercept)    0.00000000 0.00000000
## XPDS_score      -0.03231221 0.02106137
## Xinterview_age  0.04458391 0.02106322

##
## Family: gaussian
## Link function: identity
##
## Formula:
## rt_diff_large_small_z ~ PDS_score + interview_age
##
## Parametric coefficients:
##           Estimate Std. Error t value Pr(>|t|)
## (Intercept)   0.0325075  0.2987357  0.109  0.913
## PDS_score     -0.0140450  0.0353043 -0.398  0.691
## interview_age -0.0002824  0.0025262 -0.112  0.911
##
##
## R-sq.(adj) = -0.000788
## lmer.REML = 6126.5  Scale est. = 0.82974  n = 2304

##           stdcoef      stdse
## X(Intercept)    0.00000000 0.00000000
## XPDS_score      -0.008382513 0.02107077
## Xinterview_age  -0.002355721 0.02107077
```

## 2.3 Model: Caudate Anticipation ~ PDS

### Female participants

```
##
```

```

## Family: gaussian
## Link function: identity
##
## Formula:
## caudate_rvsnt_ant_z ~ PDS_score + interview_age
##
## Parametric coefficients:
##           Estimate Std. Error t value Pr(>|t|)
## (Intercept) -0.354322  0.315627  -1.123  0.262
## PDS_score    -0.027115  0.028254  -0.960  0.337
## interview_age  0.003233  0.002729   1.185  0.236
##
##
## R-sq.(adj) =  0.000154
## lmer.REML = 5413.7  Scale est. = 0.73298  n = 2071

##           stdcoef      stdse
## X(Intercept)  0.00000000 0.00000000
## XPDS_score    -0.02214033 0.02306980
## Xinterview_age 0.02721126 0.02296476

```

## Male participants

```

##
## Family: gaussian
## Link function: identity
##
## Formula:
## caudate_rvsnt_ant_z ~ PDS_score + interview_age
##
## Parametric coefficients:
##           Estimate Std. Error t value Pr(>|t|)
## (Intercept) -0.514465  0.321723  -1.599  0.110
## PDS_score    0.030375  0.039037   0.778  0.437
## interview_age  0.003963  0.002710   1.462  0.144
##
##
## R-sq.(adj) =  0.000119
## lmer.REML =  5482  Scale est. = 0.84259  n = 2045

##           stdcoef      stdse
## X(Intercept)  0.00000000 0.00000000
## XPDS_score    0.01745211 0.02242884
## Xinterview_age 0.03279334 0.02242577

```

## 2.4 Model B: Putamen Anticipation ~ PDS

### Female participants

```

##
## Family: gaussian
## Link function: identity

```

```

##
## Formula:
## putamen_rvsn_ant_z ~ PDS_score + interview_age
##
## Parametric coefficients:
##           Estimate Std. Error t value Pr(>|t|)
## (Intercept) -0.492088  0.313014  -1.572  0.116
## PDS_score    -0.010024  0.027981  -0.358  0.720
## interview_age 0.004141  0.002706   1.531  0.126
##
##
## R-sq.(adj) = 0.000294
## lmer.REML = 5384.4  Scale est. = 0.70432  n = 2071

##           stdcoef      stdse
## X(Intercept)  0.000000000 0.000000000
## XPDS_score    -0.008258293 0.02305309
## Xinterview_age 0.035115794 0.02294276

```

## Male participants

```

##
## Family: gaussian
## Link function: identity
##
## Formula:
## putamen_rvsn_ant_z ~ PDS_score + interview_age
##
## Parametric coefficients:
##           Estimate Std. Error t value Pr(>|t|)
## (Intercept) -0.358318  0.313849  -1.142  0.254
## PDS_score    -0.005580  0.038071  -0.147  0.883
## interview_age 0.003213  0.002644   1.215  0.224
##
##
## R-sq.(adj) = -0.000341
## lmer.REML = 5394.6  Scale est. = 0.66477  n = 2050

##           stdcoef      stdse
## X(Intercept)  0.000000000 0.000000000
## XPDS_score    -0.003287435 0.02242749
## Xinterview_age 0.027193302 0.02237501

```

## 2.5 Model: Accumbens Anticipation ~ PDS

### Female participants

```

##
## Family: gaussian
## Link function: identity
##
## Formula:

```

```

## accumbens_rvsnt_ant_z ~ PDS_score + interview_age
##
## Parametric coefficients:
##           Estimate Std. Error t value Pr(>|t|)
## (Intercept)  0.1374282  0.2480263   0.554   0.580
## PDS_score    -0.0319156  0.0221177  -1.443   0.149
## interview_age -0.0006455  0.0021450  -0.301   0.763
##
##
## R-sq.(adj) =  0.000265
## lmer.REML = 4425.7  Scale est. = 0.48435  n = 2066

##           stdcoef      stdse
## X(Intercept)  0.000000000 0.000000000
## XPDS_score    -0.033043238 0.02289918
## Xinterview_age -0.006884408 0.02287668

```

## Male participants

```

##
## Family: gaussian
## Link function: identity
##
## Formula:
## accumbens_rvsnt_ant_z ~ PDS_score + interview_age
##
## Parametric coefficients:
##           Estimate Std. Error t value Pr(>|t|)
## (Intercept)  0.166568  0.251739   0.662   0.508
## PDS_score    0.018581  0.030305   0.613   0.540
## interview_age -0.001568  0.002120  -0.739   0.460
##
##
## R-sq.(adj) = -0.00061
## lmer.REML = 4487.9  Scale est. = 0.44126  n = 2046

##           stdcoef      stdse
## X(Intercept)  0.000000000 0.000000000
## XPDS_score    0.01375500 0.02243394
## Xinterview_age -0.01655136 0.02238494

```

## 2.6 Model: Caudate Feedback ~ PDS

### Female participants

```

##
## Family: gaussian
## Link function: identity
##
## Formula:
## caudate_posvsneg_feedback_z ~ PDS_score + interview_age
##

```

```

## Parametric coefficients:
##           Estimate Std. Error t value Pr(>|t|)
## (Intercept) -0.010955  0.309581  -0.035  0.972
## PDS_score   0.037116  0.027726   1.339  0.181
## interview_age -0.000575  0.002675  -0.215  0.830
##
##
## R-sq.(adj) = -0.000269
## lmer.REML = 5311.2  Scale est. = 0.61773  n = 2067

##           stdcoef      stdse
## X(Intercept)  0.000000000 0.00000000
## XPDS_score    0.030988334 0.02314848
## Xinterview_age -0.004942956 0.02299573

```

## Male participants

```

##
## Family: gaussian
## Link function: identity
##
## Formula:
## caudate_posvsneg_feedback_z ~ PDS_score + interview_age
##
## Parametric coefficients:
##           Estimate Std. Error t value Pr(>|t|)
## (Intercept) -0.0100644  0.3156855  -0.032  0.975
## PDS_score   -0.0023417  0.0381382  -0.061  0.951
## interview_age 0.0002062  0.0026623   0.077  0.938
##
##
## R-sq.(adj) = -0.000971
## lmer.REML = 5442.1  Scale est. = 0.82381  n = 2051

##           stdcoef      stdse
## X(Intercept)  0.000000000 0.00000000
## XPDS_score   -0.001370448 0.02231964
## Xinterview_age 0.001728585 0.02231775

```

## 2.7 Model: Putamen Feedback ~ PDS

### Female participants

```

##
## Family: gaussian
## Link function: identity
##
## Formula:
## putamen_posvsneg_feedback_z ~ PDS_score + interview_age
##
## Parametric coefficients:
##           Estimate Std. Error t value Pr(>|t|)

```

```

## (Intercept)    0.126483    0.305477    0.414    0.679
## PDS_score      0.035447    0.027397    1.294    0.196
## interview_age -0.001628    0.002635   -0.618    0.537
##
##
## R-sq.(adj) = -0.000225
## lmer.REML = 5245.6  Scale est. = 0.6817    n = 2067

##                stdcoef      stdse
## X(Intercept)    0.00000000  0.00000000
## XPDS_score      0.02997135  0.02316538
## Xinterview_age -0.01421511  0.02301236

```

## Male participants

```

##
## Family: gaussian
## Link function: identity
##
## Formula:
## putamen_posvsneg_feedback_z ~ PDS_score + interview_age
##
## Parametric coefficients:
##              Estimate Std. Error t value Pr(>|t|)
## (Intercept)  0.280037   0.313829   0.892   0.372
## PDS_score    0.028118   0.037766   0.745   0.457
## interview_age -0.002376   0.002641  -0.900   0.368
##
##
## R-sq.(adj) = -0.000455
## lmer.REML = 5400.4  Scale est. = 0.79507    n = 2056

##                stdcoef      stdse
## X(Intercept)    0.00000000  0.00000000
## XPDS_score      0.01666775  0.02238702
## Xinterview_age -0.02014259  0.02239142

```

## 2.8 Model: Accumbens Feedback ~ PDS

### Female participants

```

##
## Family: gaussian
## Link function: identity
##
## Formula:
## accumbens_posvsneg_feedback_z ~ PDS_score + interview_age
##
## Parametric coefficients:
##              Estimate Std. Error t value Pr(>|t|)
## (Intercept) -0.370594   0.241795  -1.533   0.126
## PDS_score    0.011952   0.021694   0.551   0.582

```

```

## interview_age 0.002769 0.002090 1.325 0.185
##
##
## R-sq.(adj) = 0.000574
## lmer.REML = 4288.8 Scale est. = 0.43394 n = 2066

##          stdcoef      stdse
## X(Intercept) 0.00000000 0.00000000
## XPDS_score   0.01274990 0.02314187
## Xinterview_age 0.03048929 0.02301523

```

## Male participants

```

##
## Family: gaussian
## Link function: identity
##
## Formula:
## accumbens_posvsneg_feedback_z ~ PDS_score + interview_age
##
## Parametric coefficients:
##          Estimate Std. Error t value Pr(>|t|)
## (Intercept) 0.0057049 0.2578990 0.022 0.982
## PDS_score -0.0306109 0.0310797 -0.985 0.325
## interview_age 0.0004227 0.0021715 0.195 0.846
##
##
## R-sq.(adj) = -0.000345
## lmer.REML = 4573.9 Scale est. = 0.44906 n = 2049

##          stdcoef      stdse
## X(Intercept) 0.00000000 0.00000000
## XPDS_score -0.022114336 0.02245302
## Xinterview_age 0.004359055 0.02239593

```

## 2.9 Model: OFC Anticipation ~ PDS

### Female participants

```

##
## Family: gaussian
## Link function: identity
##
## Formula:
## lOFC_rvsnt_ant_z ~ PDS_score + interview_age
##
## Parametric coefficients:
##          Estimate Std. Error t value Pr(>|t|)
## (Intercept) 0.0801892 0.2006050 0.400 0.689
## PDS_score -0.0171588 0.0180734 -0.949 0.343
## interview_age -0.0004233 0.0017341 -0.244 0.807
##

```



```

##
## R-sq.(adj) = -0.000415
## lmer.REML = 3499.7 Scale est. = 0.31577 n = 2058

##                stdcoef      stdse
## X(Intercept)    0.00000000 0.00000000
## XPDS_score      -0.02200909 0.02318212
## Xinterview_age  -0.005631825 0.02307328

##
## Family: gaussian
## Link function: identity
##
## Formula:
## mOFC_rvsn_ant_z ~ PDS_score + interview_age
##
## Parametric coefficients:
##              Estimate Std. Error t value Pr(>|t|)
## (Intercept)  0.203967  0.231252  0.882  0.3779
## PDS_score     -0.052075  0.020727 -2.512  0.0121 *
## interview_age -0.001062  0.001998 -0.531  0.5952
## ---
## Signif. codes:  0 '***' 0.001 '**' 0.01 '*' 0.05 '.' 0.1 ' ' 1
##
##
## R-sq.(adj) = 0.00257
## lmer.REML = 4086.2 Scale est. = 0.41983 n = 2059

##                stdcoef      stdse
## X(Intercept)    0.00000000 0.00000000
## XPDS_score      -0.05809832 0.02312399
## Xinterview_age  -0.01222406 0.02300552

```

## Male participants

```

##
## Family: gaussian
## Link function: identity
##
## Formula:
## lOFC_rvsn_ant_z ~ PDS_score + interview_age
##
## Parametric coefficients:
##              Estimate Std. Error t value Pr(>|t|)
## (Intercept) -0.428284  0.216354 -1.980  0.0479 *
## PDS_score     0.024197  0.026393  0.917  0.3594
## interview_age 0.003022  0.001822  1.659  0.0974 .
## ---
## Signif. codes:  0 '***' 0.001 '**' 0.01 '*' 0.05 '.' 0.1 ' ' 1
##
##
## R-sq.(adj) = 0.000838
## lmer.REML = 3831.4 Scale est. = 0.3788 n = 2036

```

```

##               stdcoef      stdse
## X(Intercept)  0.00000000 0.00000000
## XPDS_score   0.02058862 0.02245720
## Xinterview_age 0.03726116 0.02246595

##
## Family: gaussian
## Link function: identity
##
## Formula:
## mOFC_rvs_n_ant_z ~ PDS_score + interview_age
##
## Parametric coefficients:
##           Estimate Std. Error t value Pr(>|t|)
## (Intercept) -0.1786669  0.2468011  -0.724  0.4692
## PDS_score    0.0572368  0.0300034   1.908  0.0566 .
## interview_age 0.0006223  0.0020815   0.299  0.7650
## ---
## Signif. codes:  0 '***' 0.001 '**' 0.01 '*' 0.05 '.' 0.1 ' ' 1
##
##
## R-sq.(adj) =  0.000957
## lmer.REML =  4403  Scale est. = 0.50104  n = 2042

##               stdcoef      stdse
## X(Intercept)  0.000000000 0.000000000
## XPDS_score    0.042597578 0.02232952
## Xinterview_age 0.006675486 0.02232952

```

## 2.10 Model: OFC Feedback ~ PDS

### Female participants

```

##
## Family: gaussian
## Link function: identity
##
## Formula:
## lOFC_posvsneg_feedback_z ~ PDS_score + interview_age
##
## Parametric coefficients:
##           Estimate Std. Error t value Pr(>|t|)
## (Intercept)  0.0625161  0.1799161   0.347  0.728
## PDS_score    0.0085022  0.0161609   0.526  0.599
## interview_age -0.0009009  0.0015555  -0.579  0.563
##
##
## R-sq.(adj) = -0.000829
## lmer.REML = 3071.4  Scale est. = 0.25421  n = 2067

##               stdcoef      stdse
## X(Intercept)  0.000000000 0.000000000

```

```

## XPDS_score      0.01217331 0.02313880
## Xinterview_age -0.01334089 0.02303385

##
## Family: gaussian
## Link function: identity
##
## Formula:
## mOFC_posvsneg_feedback_z ~ PDS_score + interview_age
##
## Parametric coefficients:
##           Estimate Std. Error t value Pr(>|t|)
## (Intercept) -0.0059040  0.2119441  -0.028  0.978
## PDS_score    0.0043212  0.0190101   0.227  0.820
## interview_age -0.0002242  0.0018349  -0.122  0.903
##
##
## R-sq.(adj) = -0.000935
## lmer.REML = 3789.9  Scale est. = 0.33159  n = 2071

##           stdcoef      stdse
## X(Intercept)  0.000000000 0.00000000
## XPDS_score    0.005208220 0.02291225
## Xinterview_age -0.002796687 0.02289108

```

### Male participants

```

##
## Family: gaussian
## Link function: identity
##
## Formula:
## lOFC_posvsneg_feedback_z ~ PDS_score + interview_age
##
## Parametric coefficients:
##           Estimate Std. Error t value Pr(>|t|)
## (Intercept) -0.151824  0.190749  -0.796  0.426
## PDS_score    -0.017865  0.023175  -0.771  0.441
## interview_age  0.001534  0.001608   0.954  0.340
##
##
## R-sq.(adj) = -0.00028
## lmer.REML = 3332  Scale est. = 0.24825  n = 2035

##           stdcoef      stdse
## X(Intercept)  0.000000000 0.00000000
## XPDS_score    -0.01731160 0.02245700
## Xinterview_age  0.02138588 0.02241312

##
## Family: gaussian
## Link function: identity

```

```

##
## Formula:
## mOFC_posvsneg_feedback_z ~ PDS_score + interview_age
##
## Parametric coefficients:
##           Estimate Std. Error t value Pr(>|t|)
## (Intercept) -0.0583309  0.2254788  -0.259   0.796
## PDS_score    -0.0215757  0.0274653  -0.786   0.432
## interview_age  0.0009864  0.0019008   0.519   0.604
##
##
## R-sq.(adj) = -0.000549
## lmer.REML = 4043.1  Scale est. = 0.36715  n = 2044

##           stdcoef      stdse
## X(Intercept)    0.00000000 0.00000000
## XPDS_score     -0.01758366 0.02238350
## Xinterview_age  0.01160070 0.02235347

```

## 2.11 Model: Caudate Anticipation ~ Testosterone

### Female participants

```

##
## Family: gaussian
## Link function: identity
##
## Formula:
## caudate_rvsnt_ant_z ~ hormone_scr_ert_mean + interview_age
##
## Parametric coefficients:
##           Estimate Std. Error t value Pr(>|t|)
## (Intercept)    -0.331449   0.327022  -1.014   0.311
## hormone_scr_ert_mean -0.001533   0.001263  -1.213   0.225
## interview_age     0.003171   0.002795   1.135   0.257
##
##
## R-sq.(adj) = 0.000349
## lmer.REML = 4991.7  Scale est. = 0.75377  n = 1907

##           stdcoef      stdse
## X(Intercept)    0.00000000 0.00000000
## Xhormone_scr_ert_mean -0.02858393 0.02355753
## Xinterview_age   0.02668023 0.02351705

```

### Male participants

```

##
## Family: gaussian
## Link function: identity
##
## Formula:

```

```

## caudate_rvsn_ant_z ~ hormone_scr_ert_mean + interview_age
##
## Parametric coefficients:
##           Estimate Std. Error t value Pr(>|t|)
## (Intercept)   -0.267557   0.328709  -0.814   0.416
## hormone_scr_ert_mean -0.001016   0.001469  -0.692   0.489
## interview_age    0.002560   0.002777   0.922   0.357
##
##
## R-sq.(adj) = -0.000436
## lmer.REML = 5087.4  Scale est. = 0.82111  n = 1903

##           stdcoef      stdse
## X(Intercept)      0.00000000 0.00000000
## Xhormone_scr_ert_mean -0.01617999 0.02339114
## Xinterview_age      0.02145159 0.02326813

```

## 2.12 Model B: Putamen Anticipation ~ Testosterone

### Female participants

```

##
## Family: gaussian
## Link function: identity
##
## Formula:
## putamen_rvsn_ant_z ~ hormone_scr_ert_mean + interview_age
##
## Parametric coefficients:
##           Estimate Std. Error t value Pr(>|t|)
## (Intercept)   -0.381268   0.321834  -1.185   0.236
## hormone_scr_ert_mean -0.000192   0.001245  -0.154   0.877
## interview_age    0.003094   0.002751   1.125   0.261
##
##
## R-sq.(adj) = -0.000274
## lmer.REML = 4931.4  Scale est. = 0.67821  n = 1905

##           stdcoef      stdse
## X(Intercept)      0.00000000 0.00000000
## Xhormone_scr_ert_mean -0.003633225 0.02356459
## Xinterview_age      0.026444121 0.02351027

```

### Male participants

```

##
## Family: gaussian
## Link function: identity
##
## Formula:
## putamen_rvsn_ant_z ~ hormone_scr_ert_mean + interview_age
##

```

```

## Parametric coefficients:
##           Estimate Std. Error t value Pr(>|t|)
## (Intercept)   -0.327363   0.324487  -1.009   0.313
## hormone_scr_ert_mean -0.001973   0.001451  -1.360   0.174
## interview_age    0.003410   0.002741   1.244   0.214
##
##
## R-sq.(adj) =  0.000567
## lmer.REML = 5034.6  Scale est. = 0.60689   n = 1903

##           stdcoef      stdse
## X(Intercept)      0.00000000 0.00000000
## Xhormone_scr_ert_mean -0.03184640 0.02341146
## Xinterview_age     0.02888068 0.02321811

```

## 2.13 Model: Accumbens Anticipation ~ Testosterone

### Female participants

```

##
## Family: gaussian
## Link function: identity
##
## Formula:
## accumbens_rvsn_ant_z ~ hormone_scr_ert_mean + interview_age
##
## Parametric coefficients:
##           Estimate Std. Error t value Pr(>|t|)
## (Intercept)    0.0999811  0.2558527   0.391   0.696
## hormone_scr_ert_mean -0.0004158  0.0009888  -0.421   0.674
## interview_age    -0.0006720  0.0021883  -0.307   0.759
##
##
## R-sq.(adj) = -0.000894
## lmer.REML = 4060.6  Scale est. = 0.4233   n = 1901

##           stdcoef      stdse
## X(Intercept)      0.00000000 0.00000000
## Xhormone_scr_ert_mean -0.009877818 0.02348851
## Xinterview_age     -0.007205706 0.02346533

```

### Male participants

```

##
## Family: gaussian
## Link function: identity
##
## Formula:
## accumbens_rvsn_ant_z ~ hormone_scr_ert_mean + interview_age
##
## Parametric coefficients:
##           Estimate Std. Error t value Pr(>|t|)

```

```

## (Intercept)          2.128e-01  2.587e-01  0.823  0.411
## hormone_scr_ert_mean -7.013e-05  1.159e-03  -0.061  0.952
## interview_age        -1.700e-03  2.185e-03  -0.778  0.437
##
##
## R-sq.(adj) = -0.000677
## lmer.REML = 4161.9  Scale est. = 0.43076  n = 1897

##                stdcoef      stdse
## X(Intercept)      0.00000000  0.00000000
## Xhormone_scr_ert_mean -0.00141760  0.02342748
## Xinterview_age    -0.01811179  0.02327660

```

## 2.14 Model: Caudate Feedback ~ Testosterone

### Female participants

```

##
## Family: gaussian
## Link function: identity
##
## Formula:
## caudate_posvsneg_feedback_z ~ hormone_scr_ert_mean + interview_age
##
## Parametric coefficients:
##              Estimate Std. Error t value Pr(>|t|)
## (Intercept)  -0.0884340  0.3173849  -0.279  0.781
## hormone_scr_ert_mean  0.0003856  0.0012260   0.315  0.753
## interview_age    0.0004997  0.0027122   0.184  0.854
##
##
## R-sq.(adj) = -0.000963
## lmer.REML = 4849  Scale est. = 0.59772  n = 1901

##                stdcoef      stdse
## X(Intercept)      0.00000000  0.00000000
## Xhormone_scr_ert_mean 0.007444423  0.02366809
## Xinterview_age    0.004344444  0.02358197

```

### Male participants

```

##
## Family: gaussian
## Link function: identity
##
## Formula:
## caudate_posvsneg_feedback_z ~ hormone_scr_ert_mean + interview_age
##
## Parametric coefficients:
##              Estimate Std. Error t value Pr(>|t|)
## (Intercept)  -0.057292  0.325531  -0.176  0.860
## hormone_scr_ert_mean -0.002013  0.001445  -1.393  0.164

```

```

## interview_age          0.001059   0.002755   0.384   0.701
##
##
## R-sq.(adj) = -1.49e-05
## lmer.REML = 5064.8  Scale est. = 0.82774  n = 1903

##                stdcoef      stdse
## X(Intercept)      0.000000000  0.000000000
## Xhormone_scr_ert_mean -0.032305363  0.02319243
## Xinterview_age     0.008914469  0.02319243

```

## 2.15 Model: Putamen Feedback ~ Testosterone

### Female participants

```

##
## Family: gaussian
## Link function: identity
##
## Formula:
## putamen_posvsneg_feedback_z ~ hormone_scr_ert_mean + interview_age
##
## Parametric coefficients:
##              Estimate Std. Error t value Pr(>|t|)
## (Intercept)   0.186877   0.312380   0.598   0.550
## hormone_scr_ert_mean 0.000457   0.001207   0.379   0.705
## interview_age -0.001756   0.002664  -0.659   0.510
##
##
## R-sq.(adj) = -0.00103
## lmer.REML = 4789.3  Scale est. = 0.65976  n = 1904

##                stdcoef      stdse
## X(Intercept)      0.000000000  0.000000000
## Xhormone_scr_ert_mean 0.008945327  0.02361755
## Xinterview_age    -0.015527475  0.02355634

```

### Male participants

```

##
## Family: gaussian
## Link function: identity
##
## Formula:
## putamen_posvsneg_feedback_z ~ hormone_scr_ert_mean + interview_age
##
## Parametric coefficients:
##              Estimate Std. Error t value Pr(>|t|)
## (Intercept)   0.263179   0.323216   0.814   0.4156
## hormone_scr_ert_mean -0.002500   0.001443  -1.732   0.0834 .
## interview_age  -0.001290   0.002722  -0.474   0.6355
## ---

```



```

## Signif. codes:  0 '***' 0.001 '**' 0.01 '*' 0.05 '.' 0.1 ' ' 1
##
##
## R-sq.(adj) = 0.000549
## lmer.REML = 5016.5  Scale est. = 0.7933  n = 1908

##              stdcoef      stdse
## X(Intercept)      0.00000000 0.00000000
## Xhormone_scr_ert_mean -0.04066907 0.02347873
## Xinterview_age     -0.01101568 0.02323468

```

## 2.16 Model: Accumbens Feedback ~ Testosterone

### Female participants

```

##
## Family: gaussian
## Link function: identity
##
## Formula:
## accumbens_posvsneg_feedback_z ~ hormone_scr_ert_mean + interview_age
##
## Parametric coefficients:
##              Estimate Std. Error t value Pr(>|t|)
## (Intercept)   -3.609e-01 2.501e-01 -1.443  0.149
## hormone_scr_ert_mean 8.766e-06 9.658e-04  0.009  0.993
## interview_age  2.914e-03 2.136e-03  1.365  0.173
##
##
## R-sq.(adj) = 0.000316
## lmer.REML = 3943.2  Scale est. = 0.42807  n = 1900

##              stdcoef      stdse
## X(Intercept)      0.0000000000 0.00000000
## Xhormone_scr_ert_mean 0.0002142457 0.02360565
## Xinterview_age     0.0321522608 0.02356008

```

### Male participants

```

##
## Family: gaussian
## Link function: identity
##
## Formula:
## accumbens_posvsneg_feedback_z ~ hormone_scr_ert_mean + interview_age
##
## Parametric coefficients:
##              Estimate Std. Error t value Pr(>|t|)
## (Intercept)   0.0216385 0.2648198  0.082  0.935
## hormone_scr_ert_mean -0.0014731 0.0011834 -1.245  0.213
## interview_age  0.0002912 0.0022317  0.130  0.896
##

```

```
##
## R-sq.(adj) = -4.49e-05
## lmer.REML = 4241.3 Scale est. = 0.51321 n = 1903

##                stdcoef      stdse
## X(Intercept)      0.00000000 0.00000000
## Xhormone_scr_ert_mean -0.029235035 0.02348611
## Xinterview_age      0.003034269 0.02325585
```

## 2.17 Model: OFC Anticipation ~ Testosterone

### Female participants

```
##
## Family: gaussian
## Link function: identity
##
## Formula:
## lOFC_rvsn_ant_z ~ hormone_scr_ert_mean + interview_age
##
## Parametric coefficients:
##              Estimate Std. Error t value Pr(>|t|)
## (Intercept)    0.1368392  0.2063384   0.663  0.5073
## hormone_scr_ert_mean 0.0015863  0.0007966   1.991  0.0466 *
## interview_age   -0.0015929  0.0017624  -0.904  0.3662
## ---
## Signif. codes:  0 '***' 0.001 '**' 0.01 '*' 0.05 '.' 0.1 ' ' 1
##
##
## R-sq.(adj) = 0.00096
## lmer.REML = 3200.9 Scale est. = 0.31099 n = 1894

##                stdcoef      stdse
## X(Intercept)      0.00000000 0.00000000
## Xhormone_scr_ert_mean 0.04704085 0.02362244
## Xinterview_age     -0.02132550 0.02359493

##
## Family: gaussian
## Link function: identity
##
## Formula:
## mOFC_rvsn_ant_z ~ hormone_scr_ert_mean + interview_age
##
## Parametric coefficients:
##              Estimate Std. Error t value Pr(>|t|)
## (Intercept)    0.3449714  0.2392035   1.442  0.149
## hormone_scr_ert_mean 0.0012793  0.0009213   1.389  0.165
## interview_age   -0.0033111  0.0020421  -1.621  0.105
##
##
## R-sq.(adj) = 0.000847
## lmer.REML = 3751.8 Scale est. = 0.41513 n = 1895
```

```
##                stdcoef      stdse
## X(Intercept)      0.00000000 0.00000000
## Xhormone_scr_ert_mean 0.03282873 0.02364041
## Xinterview_age   -0.03827340 0.02360548
```

### Male participants

```
##
## Family: gaussian
## Link function: identity
##
## Formula:
## lOFC_rvsn_ant_z ~ hormone_scr_ert_mean + interview_age
##
## Parametric coefficients:
##                Estimate Std. Error t value Pr(>|t|)
## (Intercept)      -0.3857820  0.2220472  -1.737  0.0825 .
## hormone_scr_ert_mean -0.0012789  0.0009898  -1.292  0.1965
## interview_age       0.0032628  0.0018744   1.741  0.0819 .
## ---
## Signif. codes:  0 '***' 0.001 '**' 0.01 '*' 0.05 '.' 0.1 ' ' 1
##
##
## R-sq.(adj) =  0.00118
## lmer.REML =  3555  Scale est. = 0.37705  n = 1890
```

```
##                stdcoef      stdse
## X(Intercept)      0.00000000 0.00000000
## Xhormone_scr_ert_mean -0.03032126 0.02346580
## Xinterview_age     0.04060635 0.02332744
```

```
##
## Family: gaussian
## Link function: identity
##
## Formula:
## mOFC_rvsn_ant_z ~ hormone_scr_ert_mean + interview_age
##
## Parametric coefficients:
##                Estimate Std. Error t value Pr(>|t|)
## (Intercept)      -7.006e-02  2.529e-01  -0.277  0.782
## hormone_scr_ert_mean  1.755e-05  1.122e-03   0.016  0.988
## interview_age       3.285e-04  2.140e-03   0.154  0.878
##
##
## R-sq.(adj) = -0.00104
## lmer.REML = 4071.1  Scale est. = 0.49562  n = 1894
```

```
##                stdcoef      stdse
## X(Intercept)      0.0000000000 0.00000000
## Xhormone_scr_ert_mean 0.0003638866 0.02326086
## Xinterview_age     0.0035712162 0.02326086
```

## 2.18 Model: OFC Feedback ~ Testosterone

### Female participants

```
##
## Family: gaussian
## Link function: identity
##
## Formula:
## lOFC_posvsneg_feedback_z ~ hormone_scr_ert_mean + interview_age
##
## Parametric coefficients:
##           Estimate Std. Error t value Pr(>|t|)
## (Intercept)      0.0322220  0.1817395   0.177  0.8593
## hormone_scr_ert_mean 0.0015346  0.0007027   2.184  0.0291 *
## interview_age     -0.0009299  0.0015530  -0.599  0.5494
## ---
## Signif. codes:  0 '***' 0.001 '**' 0.01 '*' 0.05 '.' 0.1 ' ' 1
##
##
## R-sq.(adj) =  0.0016
## lmer.REML = 2743.8  Scale est. = 0.24369  n = 1900
```

```
##           stdcoef      stdse
## X(Intercept)      0.00000000 0.00000000
## Xhormone_scr_ert_mean 0.05138086 0.02352729
## Xinterview_age     -0.01407796 0.02351004
```

```
##
## Family: gaussian
## Link function: identity
##
## Formula:
## mOFC_posvsneg_feedback_z ~ hormone_scr_ert_mean + interview_age
##
## Parametric coefficients:
##           Estimate Std. Error t value Pr(>|t|)
## (Intercept)     -0.0399194  0.2172604  -0.184  0.854
## hormone_scr_ert_mean 0.0013479  0.0008409   1.603  0.109
## interview_age     -0.0002294  0.0018584  -0.123  0.902
##
##
## R-sq.(adj) =  0.000333
## lmer.REML =   3456  Scale est. = 0.34165  n = 1905
```

```
##           stdcoef      stdse
## X(Intercept)      0.000000000 0.000000000
## Xhormone_scr_ert_mean 0.037510399 0.02339950
## Xinterview_age     -0.002888458 0.02339545
```

### Male participants

```
##
```

```

## Family: gaussian
## Link function: identity
##
## Formula:
## lOFC_posvsneg_feedback_z ~ hormone_scr_ert_mean + interview_age
##
## Parametric coefficients:
##           Estimate Std. Error t value Pr(>|t|)
## (Intercept)   -0.1192861  0.1968776  -0.606   0.545
## hormone_scr_ert_mean -0.0001786  0.0008749  -0.204   0.838
## interview_age    0.0010953  0.0016660   0.657   0.511
##
##
## R-sq.(adj) =  -0.000781
## lmer.REML = 3111.5  Scale est. = 0.2558    n = 1888

```

```

##           stdcoef      stdse
## X(Intercept)      0.00000000 0.00000000
## Xhormone_scr_ert_mean -0.004771496 0.02337131
## Xinterview_age      0.015330283 0.02331736

```

```

##
## Family: gaussian
## Link function: identity
##
## Formula:
## mOFC_posvsneg_feedback_z ~ hormone_scr_ert_mean + interview_age
##
## Parametric coefficients:
##           Estimate Std. Error t value Pr(>|t|)
## (Intercept)   -0.0309614  0.2311093  -0.134   0.893
## hormone_scr_ert_mean -0.0006028  0.0010264  -0.587   0.557
## interview_age    0.0006328  0.0019558   0.324   0.746
##
##
## R-sq.(adj) =  -0.000823
## lmer.REML = 3738.2  Scale est. = 0.3802    n = 1894

```

```

##           stdcoef      stdse
## X(Intercept)      0.00000000 0.00000000
## Xhormone_scr_ert_mean -0.013675292 0.02328506
## Xinterview_age      0.007527073 0.02326509

```

## 2.19 Model: MID Reaction Time ~ Testosterone

### Female participants

```

##
## Family: gaussian
## Link function: identity
##
## Formula:

```

```

## rt_diff_large_neutral_z ~ hormone_scr_ert_mean + interview_age
##
## Parametric coefficients:
##           Estimate Std. Error t value Pr(>|t|)
## (Intercept)   -0.678680   0.329453  -2.060  0.0395 *
## hormone_scr_ert_mean -0.001352   0.001281  -1.055  0.2913
## interview_age    0.006348   0.002819   2.252  0.0244 *
## ---
## Signif. codes:  0 '***' 0.001 '**' 0.01 '*' 0.05 '.' 0.1 ' ' 1
##
##
## R-sq.(adj) =  0.00175
## lmer.REML =  5596  Scale est. = 0.76342  n = 2066

##           stdcoef      stdse
## X(Intercept)      0.00000000 0.00000000
## Xhormone_scr_ert_mean -0.02372487 0.02247763
## Xinterview_age      0.05055583 0.02244872

##
## Family: gaussian
## Link function: identity
##
## Formula:
## rt_diff_large_small_z ~ hormone_scr_ert_mean + interview_age
##
## Parametric coefficients:
##           Estimate Std. Error t value Pr(>|t|)
## (Intercept)   -0.505114   0.343770  -1.469  0.142
## hormone_scr_ert_mean -0.001082   0.001337  -0.809  0.419
## interview_age    0.004672   0.002940   1.589  0.112
##
##
## R-sq.(adj) =  0.000344
## lmer.REML = 5754.6  Scale est. = 0.86568  n = 2066

##           stdcoef      stdse
## X(Intercept)      0.00000000 0.00000000
## Xhormone_scr_ert_mean -0.01828262 0.02259811
## Xinterview_age      0.03583781 0.02254702

```

## Male participants

```

##
## Family: gaussian
## Link function: identity
##
## Formula:
## rt_diff_large_neutral_z ~ hormone_scr_ert_mean + interview_age
##
## Parametric coefficients:
##           Estimate Std. Error t value Pr(>|t|)
## (Intercept)   -0.5366392  0.3111960  -1.724  0.0848 .

```

```

## hormone_scr_ert_mean -0.0008174 0.0013729 -0.595 0.5517
## interview_age 0.0045508 0.0026349 1.727 0.0843 .
## ---
## Signif. codes: 0 '***' 0.001 '**' 0.01 '*' 0.05 '.' 0.1 ' ' 1
##
##
## R-sq.(adj) = 0.000562
## lmer.REML = 5761.5 Scale est. = 0.84489 n = 2148

##          stdcoef      stdse
## X(Intercept) 0.00000000 0.00000000
## Xhormone_scr_ert_mean -0.01307491 0.02196054
## Xinterview_age 0.03780163 0.02188705

##
## Family: gaussian
## Link function: identity
##
## Formula:
## rt_diff_large_small_z ~ hormone_scr_ert_mean + interview_age
##
## Parametric coefficients:
##          Estimate Std. Error t value Pr(>|t|)
## (Intercept) -0.0445913 0.3084921 -0.145 0.885
## hormone_scr_ert_mean -0.0012405 0.0013575 -0.914 0.361
## interview_age 0.0004983 0.0026142 0.191 0.849
##
##
## R-sq.(adj) = -0.000542
## lmer.REML = 5736.4 Scale est. = 0.83637 n = 2148

##          stdcoef      stdse
## X(Intercept) 0.00000000 0.00000000
## Xhormone_scr_ert_mean -0.019972637 0.02185602
## Xinterview_age 0.004166389 0.02185602

```

## 2.20 Model: BIS-BAS-RR ~ Testosterone

### Female participants

```

##
## Family: gaussian
## Link function: identity
##
## Formula:
## bisbas_ss_basm_rr_z ~ hormone_scr_ert_mean + interview_age
##
## Parametric coefficients:
##          Estimate Std. Error t value Pr(>|t|)
## (Intercept) 0.3737068 0.3253719 1.149 0.251
## hormone_scr_ert_mean 0.0006886 0.0012733 0.541 0.589
## interview_age -0.0037300 0.0027769 -1.343 0.179

```

```
##
##
## R-sq.(adj) = 0.000906
## lmer.REML = 6997 Scale est. = 0.7909 n = 2467
```

```
##          stdcoef      stdse
## X(Intercept)      0.00000000 0.00000000
## Xhormone_scr_ert_mean 0.01126782 0.02083541
## Xinterview_age     -0.02783589 0.02072306
```

## Male participants

```
##
## Family: gaussian
## Link function: identity
##
## Formula:
## bisbas_ss_basm_rr_z ~ hormone_scr_ert_mean + interview_age
##
## Parametric coefficients:
##          Estimate Std. Error t value Pr(>|t|)
## (Intercept)      0.017767   0.295379   0.060   0.9520
## hormone_scr_ert_mean -0.002133   0.001296  -1.646   0.0999 .
## interview_age       0.001037   0.002493   0.416   0.6774
## ---
## Signif. codes:  0 '***' 0.001 '**' 0.01 '*' 0.05 '.' 0.1 ' ' 1
##
##
## R-sq.(adj) = -0.000457
## lmer.REML = 7435.8 Scale est. = 0.73815 n = 2686
```

```
##          stdcoef      stdse
## X(Intercept)      0.00000000 0.00000000
## Xhormone_scr_ert_mean -0.032758198 0.01990263
## Xinterview_age     0.008154483 0.01959988
```



### 3—Internalizing~Reward—

#### 3.1 Model: CBCL internalizing factor ~ Nucleus Accumbens activity (anticipation stage)

##### Female participants

```
##
## Family: gaussian
## Link function: identity
##
## Formula:
## cbcl_scr_syn_internal_r ~ accumbens_rvsn_ant_z + interview_age
##
## Parametric coefficients:
##               Estimate Std. Error t value Pr(>|t|)
## (Intercept)    0.93807    1.89253   0.496   0.6202
## accumbens_rvsn_ant_z -0.25017    0.16587  -1.508   0.1317
## interview_age    0.03348    0.01579   2.120   0.0341 *
## ---
## Signif. codes:  0 '***' 0.001 '**' 0.01 '*' 0.05 '.' 0.1 ' ' 1
##
##
## R-sq.(adj) =  0.000946
## lmer.REML = 12780 Scale est. = 15.797    n = 2065

##               stdcoef      stdse
## X(Intercept)    0.00000000 0.00000000
## Xaccumbens_rvsn_ant_z -0.03253184 0.02156971
## Xinterview_age    0.04644300 0.02190347
```

##### Male participants

```
##
## Family: gaussian
## Link function: identity
##
## Formula:
## cbcl_scr_syn_internal_r ~ accumbens_rvsn_ant_z + interview_age
##
## Parametric coefficients:
##               Estimate Std. Error t value Pr(>|t|)
## (Intercept)    2.81159    1.92279   1.462   0.144
## accumbens_rvsn_ant_z 0.03617    0.16810   0.215   0.830
## interview_age    0.01815    0.01601   1.134   0.257
##
##
## R-sq.(adj) = -0.00128
## lmer.REML = 12801 Scale est. = 14.906    n = 2046

##               stdcoef      stdse
## X(Intercept)    0.00000000 0.00000000
```

```
## Xaccumbens_rvsn_ant_z 0.004671257 0.02171120
## Xinterview_age      0.024747561 0.02183056
```

### 3.2 Model: CBCL internalizing factor ~ Caudate activity (anticipation stage)

#### Female participants

```
##
## Family: gaussian
## Link function: identity
##
## Formula:
## cbcl_scr_syn_internal_r ~ caudate_rvsn_ant_z + interview_age
##
## Parametric coefficients:
##           Estimate Std. Error t value Pr(>|t|)
## (Intercept)    1.23747    1.89544   0.653   0.5139
## caudate_rvsn_ant_z 0.03828    0.13153   0.291   0.7710
## interview_age   0.03104    0.01581   1.963   0.0498 *
## ---
## Signif. codes:  0 '***' 0.001 '**' 0.01 '*' 0.05 '.' 0.1 ' ' 1
##
##
## R-sq.(adj) = -0.000229
## lmer.REML = 12819  Scale est. = 16.059  n = 2069

##           stdcoef      stdse
## X(Intercept)    0.000000000 0.000000000
## Xcaudate_rvsn_ant_z 0.006289614 0.02160995
## Xinterview_age   0.042973215 0.02189105
```

#### Male participants

```
##
## Family: gaussian
## Link function: identity
##
## Formula:
## cbcl_scr_syn_internal_r ~ caudate_rvsn_ant_z + interview_age
##
## Parametric coefficients:
##           Estimate Std. Error t value Pr(>|t|)
## (Intercept)    2.82781    1.92247   1.471   0.141
## caudate_rvsn_ant_z 0.17149    0.13191   1.300   0.194
## interview_age   0.01835    0.01602   1.145   0.252
##
##
## R-sq.(adj) = -0.000683
## lmer.REML = 12841  Scale est. = 14.03  n = 2051

##           stdcoef      stdse
## X(Intercept)    0.000000000 0.000000000
```

```
## Xcaudate_rvsn_ant_z 0.02799388 0.02153345
## Xinterview_age      0.02494894 0.02178028
```

### 3.3 Model: CBCL internalizing factor ~ Putamen activity (anticipation stage)

#### Female participants

```
##
## Family: gaussian
## Link function: identity
##
## Formula:
## cbcl_scr_syn_internal_r ~ putamen_rvsn_ant_z + interview_age
##
## Parametric coefficients:
##              Estimate Std. Error t value Pr(>|t|)
## (Intercept)   1.055560   1.894179   0.557   0.5774
## putamen_rvsn_ant_z 0.002893   0.132368   0.022   0.9826
## interview_age  0.032556   0.015806   2.060   0.0395 *
## ---
## Signif. codes:  0 '***' 0.001 '**' 0.01 '*' 0.05 '.' 0.1 ' ' 1
##
##
## R-sq.(adj) = -0.000189
## lmer.REML = 12818 Scale est. = 15.798 n = 2069

##              stdcoef      stdse
## X(Intercept)   0.0000000000 0.00000000
## Xputamen_rvsn_ant_z 0.0004723149 0.02160736
## Xinterview_age  0.0450895285 0.02189021
```

#### Male participants

```
##
## Family: gaussian
## Link function: identity
##
## Formula:
## cbcl_scr_syn_internal_r ~ putamen_rvsn_ant_z + interview_age
##
## Parametric coefficients:
##              Estimate Std. Error t value Pr(>|t|)
## (Intercept)   3.003713   1.926023   1.560   0.119
## putamen_rvsn_ant_z -0.002347   0.135141  -0.017   0.986
## interview_age  0.016796   0.016046   1.047   0.295
##
##
## R-sq.(adj) = -0.00129
## lmer.REML = 12834 Scale est. = 14.129 n = 2050

##              stdcoef      stdse
## X(Intercept)   0.0000000000 0.00000000
```

```
## Xputamen_rvsn_ant_z -0.0003768869 0.02170540
## Xinterview_age      0.0228301843 0.02181099
```

### 3.4 Model: CBCL internalizing factor ~ Accumbens activity (feedback stage)

#### Female participants

```
##
## Family: gaussian
## Link function: identity
##
## Formula:
## cbcl_scr_syn_internal_r ~ accumbens_posvsneg_feedback_z + interview_age
##
## Parametric coefficients:
##
##           Estimate Std. Error t value Pr(>|t|)
## (Intercept)      0.99988    1.89645   0.527  0.5981
## accumbens_posvsneg_feedback_z  0.19684    0.17181   1.146  0.2521
## interview_age      0.03298    0.01582   2.085  0.0372 *
## ---
## Signif. codes:  0 '***' 0.001 '**' 0.01 '*' 0.05 '.' 0.1 ' ' 1
##
##
## R-sq.(adj) =  0.00028
## lmer.REML = 12781  Scale est. = 15.798    n = 2064

##           stdcoef      stdse
## X(Intercept)      0.00000000 0.00000000
## Xaccumbens_posvsneg_feedback_z  0.02475519 0.02160702
## Xinterview_age     0.04568771 0.02191529
```

#### Male participants

```
##
## Family: gaussian
## Link function: identity
##
## Formula:
## cbcl_scr_syn_internal_r ~ accumbens_posvsneg_feedback_z + interview_age
##
## Parametric coefficients:
##
##           Estimate Std. Error t value Pr(>|t|)
## (Intercept)      3.36478    1.93092   1.743  0.0816 .
## accumbens_posvsneg_feedback_z -0.22281    0.16571  -1.345  0.1789
## interview_age      0.01399    0.01609   0.869  0.3847
## ---
## Signif. codes:  0 '***' 0.001 '**' 0.01 '*' 0.05 '.' 0.1 ' ' 1
##
##
## R-sq.(adj) = -0.000388
## lmer.REML = 12833  Scale est. = 14.8      n = 2049
```

```
##
##
##          stdcoef      stdse
## X(Intercept)          0.00000000 0.00000000
## Xaccumbens_posvsneg_feedback_z -0.02927669 0.02177379
## Xinterview_age          0.01895670 0.02180197
```

### 3.5 Model: CBCL internalizing factor ~ Caudate activity (feedback stage)

#### Female participants

```
##
## Family: gaussian
## Link function: identity
##
## Formula:
## cbcl_scr_syn_internal_r ~ caudate_posvsneg_feedback_z + interview_age
##
## Parametric coefficients:
##          Estimate Std. Error t value Pr(>|t|)
## (Intercept)          0.99119    1.89617   0.523  0.6012
## caudate_posvsneg_feedback_z -0.03668    0.13461  -0.272  0.7853
## interview_age          0.03312    0.01582   2.094  0.0364 *
## ---
## Signif. codes:  0 '***' 0.001 '**' 0.01 '*' 0.05 '.' 0.1 ' ' 1
##
##
## R-sq.(adj) = -0.000154
## lmer.REML = 12789 Scale est. = 15.852    n = 2065
##
##          stdcoef      stdse
## X(Intercept)          0.000000000 0.000000000
## Xcaudate_posvsneg_feedback_z -0.005903269 0.02166702
## Xinterview_age          0.045857838 0.02190158
```

#### Male participants

```
##
## Family: gaussian
## Link function: identity
##
## Formula:
## cbcl_scr_syn_internal_r ~ caudate_posvsneg_feedback_z + interview_age
##
## Parametric coefficients:
##          Estimate Std. Error t value Pr(>|t|)
## (Intercept)          3.32207    1.92624   1.725  0.0847 .
## caudate_posvsneg_feedback_z -0.15618    0.13309  -1.174  0.2407
## interview_age          0.01417    0.01606   0.883  0.3775
## ---
## Signif. codes:  0 '***' 0.001 '**' 0.01 '*' 0.05 '.' 0.1 ' ' 1
##
##
## R-sq.(adj) = -0.000217
## lmer.REML = 12843 Scale est. = 14.85    n = 2051
```

```

##                stdcoef      stdse
## X(Intercept)      0.00000000 0.00000000
## Xcaudate_posvsneg_feedback_z -0.02531019 0.02156786
## Xinterview_age      0.01925548 0.02181229

```

### 3.6 Model: CBCL internalizing factor ~ Putamen activity (feedback stage)

#### Female participants

```

##
## Family: gaussian
## Link function: identity
##
## Formula:
## cbcl_scr_syn_internal_r ~ putamen_posvsneg_feedback_z + interview_age
##
## Parametric coefficients:
##                Estimate Std. Error t value Pr(>|t|)
## (Intercept)      1.13313    1.89586   0.598  0.5501
## putamen_posvsneg_feedback_z -0.11704    0.13669  -0.856  0.3919
## interview_age      0.03186    0.01582   2.014  0.0442 *
## ---
## Signif. codes:  0 '***' 0.001 '**' 0.01 '*' 0.05 '.' 0.1 ' ' 1
##
##
## R-sq.(adj) =  0.000199
## lmer.REML = 12792  Scale est. = 16.215    n = 2065
##
##                stdcoef      stdse
## X(Intercept)      0.00000000 0.00000000
## Xputamen_posvsneg_feedback_z -0.01856874 0.02168511
## Xinterview_age      0.04414924 0.02192297

```

#### Male participants

```

##
## Family: gaussian
## Link function: identity
##
## Formula:
## cbcl_scr_syn_internal_r ~ putamen_posvsneg_feedback_z + interview_age
##
## Parametric coefficients:
##                Estimate Std. Error t value Pr(>|t|)
## (Intercept)      3.23873    1.92503   1.682  0.0926 .
## putamen_posvsneg_feedback_z -0.04213    0.13493  -0.312  0.7549
## interview_age      0.01493    0.01604   0.931  0.3521
## ---
## Signif. codes:  0 '***' 0.001 '**' 0.01 '*' 0.05 '.' 0.1 ' ' 1
##
##
## R-sq.(adj) = -0.00116
## lmer.REML = 12878  Scale est. = 15.039    n = 2056

```

```

##                stdcoef    stdse
## X(Intercept)    0.00000000 0.0000000
## Xputamen_posvsneg_feedback_z -0.006749898 0.0216173
## Xinterview_age  0.020279347 0.0217891

```

### 3.7 Model: CBCL internalizing factor ~ OFC activity (anticipation stage)

#### Female participants

```

##
## Family: gaussian
## Link function: identity
##
## Formula:
## cbcl_scr_syn_internal_r ~ lOFC_rvsn_ant_z + interview_age
##
## Parametric coefficients:
##           Estimate Std. Error t value Pr(>|t|)
## (Intercept)  1.00430    1.90118   0.528   0.5974
## lOFC_rvsn_ant_z  0.05371    0.20796   0.258   0.7962
## interview_age  0.03302    0.01586   2.082   0.0374 *
## ---
## Signif. codes:  0 '***' 0.001 '**' 0.01 '*' 0.05 '.' 0.1 ' ' 1
##
##
## R-sq.(adj) = -8.98e-05
## lmer.REML = 12736 Scale est. = 15.567    n = 2056

```

```

##                stdcoef    stdse
## X(Intercept)    0.00000000 0.00000000
## XlOFC_rvsn_ant_z 0.005568829 0.02156341
## Xinterview_age  0.045736012 0.02196480

```

```

##
## Family: gaussian
## Link function: identity
##
## Formula:
## cbcl_scr_syn_internal_r ~ mOFC_rvsn_ant_z + interview_age
##
## Parametric coefficients:
##           Estimate Std. Error t value Pr(>|t|)
## (Intercept)  0.82010    1.90148   0.431   0.6663
## mOFC_rvsn_ant_z 0.17691    0.17881   0.989   0.3226
## interview_age  0.03454    0.01587   2.177   0.0296 *
## ---
## Signif. codes:  0 '***' 0.001 '**' 0.01 '*' 0.05 '.' 0.1 ' ' 1
##
##
## R-sq.(adj) = 0.000336
## lmer.REML = 12741 Scale est. = 15.138    n = 2057

```

```

##                stdcoef    stdse

```

```
## X(Intercept)      0.00000000 0.00000000
## XmOFC_rvsn_ant_z 0.02118601 0.02141320
## Xinterview_age   0.04776384 0.02194123
```

## Male participants

```
##
## Family: gaussian
## Link function: identity
##
## Formula:
## cbcl_scr_syn_internal_r ~ lOFC_rvsn_ant_z + interview_age
##
## Parametric coefficients:
##           Estimate Std. Error t value Pr(>|t|)
## (Intercept)    2.62529    1.91357   1.372   0.170
## lOFC_rvsn_ant_z -0.10772    0.19356  -0.557   0.578
## interview_age   0.01966    0.01592   1.235   0.217
##
##
## R-sq.(adj) = -0.00122
## lmer.REML = 12706 Scale est. = 13.821    n = 2036
```

```
##           stdcoef      stdse
## X(Intercept)      0.00000000 0.00000000
## XlOFC_rvsn_ant_z -0.01198528 0.02153614
## Xinterview_age    0.02697017 0.02184451
```

```
##
## Family: gaussian
## Link function: identity
##
## Formula:
## cbcl_scr_syn_internal_r ~ mOFC_rvsn_ant_z + interview_age
##
## Parametric coefficients:
##           Estimate Std. Error t value Pr(>|t|)
## (Intercept)    2.51935    1.92180   1.311   0.190
## mOFC_rvsn_ant_z -0.12792    0.16826  -0.760   0.447
## interview_age   0.02059    0.01600   1.287   0.198
##
##
## R-sq.(adj) = -0.0012
## lmer.REML = 12765 Scale est. = 13.816    n = 2042
```

```
##           stdcoef      stdse
## X(Intercept)      0.00000000 0.00000000
## XmOFC_rvsn_ant_z -0.01623520 0.02135579
## Xinterview_age    0.02803578 0.02178658
```



### 3.8 Model: CBCL internalizing factor ~ OFC activity (feedback stage)

#### Female participants

```
##
## Family: gaussian
## Link function: identity
##
## Formula:
## cbcl_scr_syn_internal_r ~ lOFC_posvsneg_feedback_z + interview_age
##
## Parametric coefficients:
##              Estimate Std. Error t value Pr(>|t|)
## (Intercept)    0.98560    1.89246   0.521   0.6026
## lOFC_posvsneg_feedback_z -0.04673    0.23076  -0.203   0.8395
## interview_age    0.03302    0.01579   2.091   0.0366 *
## ---
## Signif. codes:  0 '***' 0.001 '**' 0.01 '*' 0.05 '.' 0.1 ' ' 1
##
##
## R-sq.(adj) = -0.000146
## lmer.REML = 12779 Scale est. = 16.099    n = 2065

##              stdcoef      stdse
## X(Intercept)    0.00000000 0.00000000
## XlOFC_posvsneg_feedback_z -0.004375458 0.02160700
## Xinterview_age    0.045862853 0.02192932

##
## Family: gaussian
## Link function: identity
##
## Formula:
## cbcl_scr_syn_internal_r ~ mOFC_posvsneg_feedback_z + interview_age
##
## Parametric coefficients:
##              Estimate Std. Error t value Pr(>|t|)
## (Intercept)    0.92801    1.89200   0.490   0.6238
## mOFC_posvsneg_feedback_z 0.20371    0.19485   1.046   0.2959
## interview_age    0.03360    0.01578   2.129   0.0334 *
## ---
## Signif. codes:  0 '***' 0.001 '**' 0.01 '*' 0.05 '.' 0.1 ' ' 1
##
##
## R-sq.(adj) = 0.000549
## lmer.REML = 12810 Scale est. = 15.903    n = 2069

##              stdcoef      stdse
## X(Intercept)    0.00000000 0.00000000
## XmOFC_posvsneg_feedback_z 0.02252826 0.02154774
## Xinterview_age    0.04658350 0.02187988
```

## Male participants

```
##
## Family: gaussian
## Link function: identity
##
## Formula:
## cbcl_scr_syn_internal_r ~ l0FC_posvsneg_feedback_z + interview_age
##
## Parametric coefficients:
##              Estimate Std. Error t value Pr(>|t|)
## (Intercept)    3.12278    1.93031   1.618   0.106
## l0FC_posvsneg_feedback_z 0.15275    0.22303   0.685   0.493
## interview_age   0.01593    0.01608   0.991   0.322
##
##
## R-sq.(adj) = -0.00122
## lmer.REML = 12729  Scale est. = 14.972    n = 2035

##              stdcoef      stdse
## X(Intercept)    0.00000000 0.00000000
## Xl0FC_posvsneg_feedback_z 0.01493689 0.02180927
## Xinterview_age  0.02171403 0.02191158

##
## Family: gaussian
## Link function: identity
##
## Formula:
## cbcl_scr_syn_internal_r ~ m0FC_posvsneg_feedback_z + interview_age
##
## Parametric coefficients:
##              Estimate Std. Error t value Pr(>|t|)
## (Intercept)    3.07567    1.92215   1.600   0.110
## m0FC_posvsneg_feedback_z 0.06058    0.18722   0.324   0.746
## interview_age   0.01633    0.01601   1.020   0.308
##
##
## R-sq.(adj) = -0.00121
## lmer.REML = 12780  Scale est. = 14.999    n = 2044

##              stdcoef      stdse
## X(Intercept)    0.00000000 0.00000000
## Xm0FC_posvsneg_feedback_z 0.007034218 0.02174054
## Xinterview_age  0.022296228 0.02186698
```

## 3.9 Model: CBCL internalizing factor ~ BIS-BAS-RR

### Female participants

```
##
## Family: gaussian
```

```

## Link function: identity
##
## Formula:
## cbcl_scr_syn_internal_r ~ bisbas_ss_basm_rr + interview_age
##
## Parametric coefficients:
##           Estimate Std. Error t value Pr(>|t|)
## (Intercept)    1.21645    1.72886   0.704   0.4817
## bisbas_ss_basm_rr -0.02712    0.04321  -0.628   0.5303
## interview_age    0.03358    0.01401   2.398   0.0166 *
## ---
## Signif. codes:  0 '***' 0.001 '**' 0.01 '*' 0.05 '.' 0.1 ' ' 1
##
##
## R-sq.(adj) = -0.000264
## lmer.REML = 16599  Scale est. = 17.025    n = 2681

##           stdcoef      stdse
## X(Intercept)    0.00000000 0.00000000
## Xbisbas_ss_basm_rr -0.01201656 0.01914694
## Xinterview_age    0.04625226 0.01929145

```

### Male participants

```

##
## Family: gaussian
## Link function: identity
##
## Formula:
## cbcl_scr_syn_internal_r ~ bisbas_ss_basm_rr + interview_age
##
## Parametric coefficients:
##           Estimate Std. Error t value Pr(>|t|)
## (Intercept)    3.11239    1.69534   1.836   0.0665 .
## bisbas_ss_basm_rr -0.06658    0.04448  -1.497   0.1346
## interview_age    0.02135    0.01374   1.554   0.1203
## ---
## Signif. codes:  0 '***' 0.001 '**' 0.01 '*' 0.05 '.' 0.1 ' ' 1
##
##
## R-sq.(adj) = -0.000597
## lmer.REML = 18107  Scale est. = 16.736    n = 2893

##           stdcoef      stdse
## X(Intercept)    0.00000000 0.00000000
## Xbisbas_ss_basm_rr -0.02744649 0.01833863
## Xinterview_age    0.02873301 0.01848803

```

## 3.10 Model: CBCL internalizing factor ~ MID Reaction Time

### Female participants

```
##
```

```

## Family: gaussian
## Link function: identity
##
## Formula:
## cbcl_scr_syn_internal_r ~ rt_diff_large_neutral_z + interview_age
##
## Parametric coefficients:
##           Estimate Std. Error t value Pr(>|t|)
## (Intercept)      0.65045    1.84166   0.353  0.7240
## rt_diff_large_neutral_z 0.10720    0.12129   0.884  0.3769
## interview_age      0.03602    0.01536   2.346  0.0191 *
## ---
## Signif. codes:  0 '***' 0.001 '**' 0.01 '*' 0.05 '.' 0.1 ' ' 1
##
## R-sq.(adj) =  0.000286
## lmer.REML = 13864 Scale est. = 16.79    n = 2237

```

```

##           stdcoef      stdse
## X(Intercept)      0.00000000 0.00000000
## Xrt_diff_large_neutral_z 0.01831347 0.02072078
## Xinterview_age     0.04932191 0.02102775

```

```

##
## Family: gaussian
## Link function: identity
##
## Formula:
## cbcl_scr_syn_internal_r ~ rt_diff_large_small_z + interview_age
##
## Parametric coefficients:
##           Estimate Std. Error t value Pr(>|t|)
## (Intercept)      0.65522    1.84051   0.356  0.7219
## rt_diff_large_small_z 0.14840    0.11684   1.270  0.2042
## interview_age      0.03601    0.01535   2.346  0.0191 *
## ---
## Signif. codes:  0 '***' 0.001 '**' 0.01 '*' 0.05 '.' 0.1 ' ' 1
##
## R-sq.(adj) =  0.000654
## lmer.REML = 13864 Scale est. = 16.809    n = 2237

```

```

##           stdcoef      stdse
## X(Intercept)      0.00000000 0.00000000
## Xrt_diff_large_small_z 0.02637377 0.02076472
## Xinterview_age     0.04929782 0.02101228

```

## Male participants

```

##
## Family: gaussian
## Link function: identity
##

```

```

## Formula:
## cbcl_scr_syn_internal_r ~ rt_diff_large_neutral_z + interview_age
##
## Parametric coefficients:
##           Estimate Std. Error t value Pr(>|t|)
## (Intercept)      2.27829    1.81447   1.256   0.209
## rt_diff_large_neutral_z -0.09028    0.12278  -0.735   0.462
## interview_age      0.02284    0.01512   1.511   0.131
##
##
## R-sq.(adj) = -0.00078
## lmer.REML = 14407  Scale est. = 13.459    n = 2304

##           stdcoef      stdse
## X(Intercept)          0.0000000 0.0000000
## Xrt_diff_large_neutral_z -0.01487991 0.02023669
## Xinterview_age         0.03106944 0.02055981

##
## Family: gaussian
## Link function: identity
##
## Formula:
## cbcl_scr_syn_internal_r ~ rt_diff_large_small_z + interview_age
##
## Parametric coefficients:
##           Estimate Std. Error t value Pr(>|t|)
## (Intercept)      2.32101    1.81284   1.280   0.201
## rt_diff_large_small_z -0.12010    0.12369  -0.971   0.332
## interview_age      0.02249    0.01510   1.489   0.137
##
##
## R-sq.(adj) = -0.000713
## lmer.REML = 14407  Scale est. = 13.408    n = 2304

##           stdcoef      stdse
## X(Intercept)          0.0000000 0.0000000
## Xrt_diff_large_small_z -0.01958396 0.02016891
## Xinterview_age         0.03058289 0.02054226

```

## 4—Internalizing~Puberty x Reward—

### 4.1 Model: CBCL internalizing factor ~ PDS x Accumbens activity (anticipation stage)

#### Female participants

```
##
## Family: gaussian
## Link function: identity
##
## Formula:
## cbcl_scr_syn_internal_r ~ PDS_score * accumbens_rvsn_ant_z +
##   race.ethnicity.5level + demo_race_hispanic + interview_age
##
## Parametric coefficients:
##              Estimate Std. Error t value Pr(>|t|)
## (Intercept)    0.77200    2.04095   0.378   0.705
## PDS_score      0.93801    0.17923   5.234 1.84e-07 ***
## accumbens_rvsn_ant_z 0.13655    0.41196   0.331   0.740
## race.ethnicity.5levelBlack -0.31095    0.79209  -0.393   0.695
## race.ethnicity.5levelMixed  0.99979    0.78464   1.274   0.203
## race.ethnicity.5levelOther  0.31596    0.92933   0.340   0.734
## race.ethnicity.5levelWhite  1.14295    0.72391   1.579   0.115
## demo_race_hispanic1  0.10693    0.35665   0.300   0.764
## interview_age  0.01433    0.01658   0.864   0.388
## PDS_score:accumbens_rvsn_ant_z -0.21652    0.22244  -0.973   0.330
## ---
## Signif. codes:  0 '***' 0.001 '**' 0.01 '*' 0.05 '.' 0.1 ' ' 1
##
##
## R-sq.(adj) =  0.0181
## lmer.REML = 12381  Scale est. = 15.847    n = 2010

##              stdcoef      stdse
## X(Intercept)    0.00000000 0.00000000
## XPDS_score      0.127119177 0.02428869
## Xaccumbens_rvsn_ant_z 0.017787600 0.05366165
## Xrace.ethnicity.5levelBlack -0.020254759 0.05159550
## Xrace.ethnicity.5levelMixed  0.061024772 0.04789274
## Xrace.ethnicity.5levelOther  0.012402564 0.03648015
## Xrace.ethnicity.5levelWhite  0.100857757 0.06388025
## Xdemo_race_hispanic1  0.007846373 0.02616993
## Xinterview_age  0.019981142 0.02312865
## XPDS_score:accumbens_rvsn_ant_z -0.052221566 0.05364977
```

#### Male participants

```
##
## Family: gaussian
## Link function: identity
##
```

```

## Formula:
## cbcl_scr_syn_internal_r ~ PDS_score * accumbens_rvsn_ant_z +
##   race.ethnicity.5level + demo_race_hispanic + interview_age
##
## Parametric coefficients:
##
##           Estimate Std. Error t value Pr(>|t|)
## (Intercept)  2.666877   2.176336   1.225 0.220570
## PDS_score    0.891773   0.244024   3.654 0.000264 ***
## accumbens_rvsn_ant_z  0.346946   0.415334   0.835 0.403625
## race.ethnicity.5levelBlack -0.441454   1.005029  -0.439 0.660532
## race.ethnicity.5levelMixed  0.547922   0.994986   0.551 0.581913
## race.ethnicity.5levelOther -0.837758   1.109548  -0.755 0.450312
## race.ethnicity.5levelWhite  0.171422   0.936106   0.183 0.854721
## demo_race_hispanic1  0.910656   0.377863   2.410 0.016042 *
## interview_age  0.007004   0.016364   0.428 0.668713
## PDS_score:accumbens_rvsn_ant_z -0.242806   0.278015  -0.873 0.382576
## ---
## Signif. codes:  0 '***' 0.001 '**' 0.01 '*' 0.05 '.' 0.1 ' ' 1
##
##
## R-sq.(adj) =  0.00704
## lmer.REML = 12495  Scale est. = 15.147   n = 2000

##           stdcoef      stdse
## X(Intercept)  0.000000000 0.000000000
## XPDS_score    0.084911659 0.02323514
## Xaccumbens_rvsn_ant_z  0.044937997 0.05379588
## Xrace.ethnicity.5levelBlack -0.024688729 0.05620726
## Xrace.ethnicity.5levelMixed  0.031478540 0.05716269
## Xrace.ethnicity.5levelOther -0.033246549 0.04403260
## Xrace.ethnicity.5levelWhite  0.014007340 0.07649165
## Xdemo_race_hispanic1  0.064614934 0.02681100
## Xinterview_age  0.009527796 0.02226232
## XPDS_score:accumbens_rvsn_ant_z -0.047002510 0.05381839

```

## 4.2 Model: CBCL internalizing factor ~ PDS x Caudate activity (anticipation stage)

### Female participants

```

##
## Family: gaussian
## Link function: identity
##
## Formula:
## cbcl_scr_syn_internal_r ~ PDS_score * caudate_rvsn_ant_z + race.ethnicity.5level +
##   demo_race_hispanic + interview_age
##
## Parametric coefficients:
##
##           Estimate Std. Error t value Pr(>|t|)
## (Intercept)  0.95469   2.03804   0.468  0.6395
## PDS_score    0.91368   0.17921   5.098 3.75e-07 ***
## caudate_rvsn_ant_z  0.74877   0.33308   2.248  0.0247 *

```

```

## race.ethnicity.5levelBlack -0.24603 0.79297 -0.310 0.7564
## race.ethnicity.5levelMixed 1.03899 0.78470 1.324 0.1856
## race.ethnicity.5levelOther 0.36634 0.93107 0.393 0.6940
## race.ethnicity.5levelWhite 1.21556 0.72461 1.678 0.0936
## demo_race_hispanic1 0.10129 0.35622 0.284 0.7762
## interview_age 0.01267 0.01657 0.765 0.4444
## PDS_score:caudate_rvs_n_ant_z -0.44212 0.18304 -2.415 0.0158 *
## ---
## Signif. codes: 0 '***' 0.001 '**' 0.01 '*' 0.05 '.' 0.1 ' ' 1
##
##
## R-sq.(adj) = 0.0188
## lmer.REML = 12417 Scale est. = 16.384 n = 2014

```

```

##
##          stdcoef      stdse
## X(Intercept) 0.00000000 0.00000000
## XPDS_score 0.12347381 0.02421871
## Xcaudate_rvs_n_ant_z 0.12385070 0.05509295
## Xrace.ethnicity.5levelBlack -0.01602007 0.05163382
## Xrace.ethnicity.5levelMixed 0.06375643 0.04815204
## Xrace.ethnicity.5levelOther 0.01425937 0.03624059
## Xrace.ethnicity.5levelWhite 0.10717664 0.06388924
## Xdemo_race_hispanic1 0.00743021 0.02613229
## Xinterview_age 0.01763725 0.02305587
## XPDS_score:caudate_rvs_n_ant_z -0.13340625 0.05523115

```

### Male participants

```

##
## Family: gaussian
## Link function: identity
##
## Formula:
## cbcl_scr_syn_internal_r ~ PDS_score * caudate_rvs_n_ant_z + race.ethnicity.5level +
##   demo_race_hispanic + interview_age
##
## Parametric coefficients:
##
##          Estimate Std. Error t value Pr(>|t|)
## (Intercept) 2.548908 2.176417 1.171 0.241679
## PDS_score 0.892114 0.245847 3.629 0.000292 ***
## caudate_rvs_n_ant_z -0.134726 0.361758 -0.372 0.709620
## race.ethnicity.5levelBlack -0.335689 1.006486 -0.334 0.738772
## race.ethnicity.5levelMixed 0.631809 0.997021 0.634 0.526351
## race.ethnicity.5levelOther -0.922835 1.111439 -0.830 0.406465
## race.ethnicity.5levelWhite 0.241007 0.938854 0.257 0.797435
## demo_race_hispanic1 0.999729 0.381293 2.622 0.008809 **
## interview_age 0.007682 0.016379 0.469 0.639090
## PDS_score:caudate_rvs_n_ant_z 0.224536 0.253033 0.887 0.374981
## ---
## Signif. codes: 0 '***' 0.001 '**' 0.01 '*' 0.05 '.' 0.1 ' ' 1
##
##
## R-sq.(adj) = 0.00829

```



```
## lmer.REML = 12527 Scale est. = 14.127 n = 2004
```

```
##                stdcoef      stdse
## X(Intercept)    0.00000000 0.00000000
## XPDS_score      0.08396577 0.02313908
## Xcaudate_rvsn_ant_z -0.02193078 0.05888723
## Xrace.ethnicity.5levelBlack -0.01885254 0.05652497
## Xrace.ethnicity.5levelMixed 0.03629794 0.05727961
## Xrace.ethnicity.5levelOther -0.03681492 0.04433896
## Xrace.ethnicity.5levelWhite 0.01970178 0.07674932
## Xdemo_race_hispanic1 0.07033827 0.02682675
## Xinterview_age 0.01041830 0.02221182
## XPDS_score:caudate_rvsn_ant_z 0.05220388 0.05882923
```

### 4.3 Model: CBCL internalizing factor ~ PDS x Putamen activity (anticipation stage)

#### Female participants

```
##
## Family: gaussian
## Link function: identity
##
## Formula:
## cbcl_scr_syn_internal_r ~ PDS_score * putamen_rvsn_ant_z + race.ethnicity.5level +
##   demo_race_hispanic + interview_age
##
## Parametric coefficients:
##                Estimate Std. Error t value Pr(>|t|)
## (Intercept)    0.85569    2.03719   0.420  0.6745
## PDS_score      0.92594    0.17910   5.170 2.57e-07 ***
## putamen_rvsn_ant_z 0.51517    0.33779   1.525  0.1274
## race.ethnicity.5levelBlack -0.27463    0.79368  -0.346  0.7294
## race.ethnicity.5levelMixed 1.01544    0.78561   1.293  0.1963
## race.ethnicity.5levelOther 0.31711    0.93009   0.341  0.7332
## race.ethnicity.5levelWhite 1.21262    0.72506   1.672  0.0946 .
## demo_race_hispanic1 0.09662    0.35647   0.271  0.7864
## interview_age 0.01346    0.01656   0.813  0.4164
## PDS_score:putamen_rvsn_ant_z -0.33513    0.18396  -1.822  0.0686 .
## ---
## Signif. codes:  0 '***' 0.001 '**' 0.01 '*' 0.05 '.' 0.1 ' ' 1
##
##
## R-sq.(adj) = 0.018
## lmer.REML = 12418 Scale est. = 16.013 n = 2014
##
##                stdcoef      stdse
## X(Intercept)    0.00000000 0.00000000
## XPDS_score      0.125377667 0.02425075
## Xputamen_rvsn_ant_z 0.084458007 0.05537762
## Xrace.ethnicity.5levelBlack -0.017858278 0.05161025
## Xrace.ethnicity.5levelMixed 0.062210629 0.04813059
## Xrace.ethnicity.5levelOther 0.012407145 0.03639053
```

```
## Xrace.ethnicity.5levelWhite      0.106891235 0.06391322
## Xdemo_race_hispanic1             0.007095542 0.02617838
## Xinterview_age                    0.018743826 0.02305931
## XPDS_score:putamen_rvsn_ant_z    -0.100923737 0.05539811
```

#### Male participants

```
##
## Family: gaussian
## Link function: identity
##
## Formula:
## cbcl_scr_syn_internal_r ~ PDS_score * putamen_rvsn_ant_z + race.ethnicity.5level +
##   demo_race_hispanic + interview_age
##
## Parametric coefficients:
##              Estimate Std. Error t value Pr(>|t|)
## (Intercept)   2.772465   2.178555   1.273 0.203303
## PDS_score      0.923913   0.246281   3.751 0.000181 ***
## putamen_rvsn_ant_z 0.263098   0.372731   0.706 0.480354
## race.ethnicity.5levelBlack -0.414334   1.006452  -0.412 0.680620
## race.ethnicity.5levelMixed  0.631934   0.996600   0.634 0.526095
## race.ethnicity.5levelOther -0.848368   1.112611  -0.763 0.445850
## race.ethnicity.5levelWhite  0.233564   0.938729   0.249 0.803535
## demo_race_hispanic1  0.939536   0.377969   2.486 0.013009 *
## interview_age    0.005547   0.016391   0.338 0.735066
## PDS_score:putamen_rvsn_ant_z -0.212775   0.256544  -0.829 0.406984
## ---
## Signif. codes:  0 '***' 0.001 '**' 0.01 '*' 0.05 '.' 0.1 ' ' 1
##
##
## R-sq.(adj) =  0.00788
## lmer.REML = 12520  Scale est. = 14.196    n = 2003

##              stdcoef      stdse
## X(Intercept)   0.000000000 0.00000000
## XPDS_score     0.087043292 0.02320250
## Xputamen_rvsn_ant_z 0.042199778 0.05978439
## Xrace.ethnicity.5levelBlack -0.023249208 0.05647435
## Xrace.ethnicity.5levelMixed  0.036411372 0.05742299
## Xrace.ethnicity.5levelOther -0.033730505 0.04423659
## Xrace.ethnicity.5levelWhite  0.019103737 0.07678093
## Xdemo_race_hispanic1  0.066367952 0.02669942
## Xinterview_age  0.007519015 0.02221661
## XPDS_score:putamen_rvsn_ant_z -0.049532787 0.05972202
```

#### 4.4 Model: CBCL internalizing factor ~ PDS x Lateral OFC activity (anticipation stage)

##### Female participants

```
##
```

```

## Family: gaussian
## Link function: identity
##
## Formula:
## cbcl_scr_syn_internal_r ~ PDS_score * l0FC_rvsn_ant_z + race.ethnicity.5level +
##   demo_race_hispanic + interview_age
##
## Parametric coefficients:
##              Estimate Std. Error t value Pr(>|t|)
## (Intercept)    0.54072    2.05077   0.264  0.7921
## PDS_score      0.88175    0.18133   4.863 1.25e-06 ***
## l0FC_rvsn_ant_z 0.62047    0.49823   1.245  0.2132
## race.ethnicity.5levelBlack 0.03954    0.80302   0.049  0.9607
## race.ethnicity.5levelMixed 1.30077    0.79355   1.639  0.1013
## race.ethnicity.5levelOther 0.67842    0.93727   0.724  0.4693
## race.ethnicity.5levelWhite 1.46816    0.73318   2.002  0.0454 *
## demo_race_hispanic1 0.08453    0.35856   0.236  0.8136
## interview_age  0.01455    0.01665   0.874  0.3822
## PDS_score:l0FC_rvsn_ant_z -0.36763    0.27263  -1.348  0.1777
## ---
## Signif. codes:  0 '***' 0.001 '**' 0.01 '*' 0.05 '.' 0.1 ' ' 1
##
##
## R-sq.(adj) =  0.0157
## lmer.REML = 12340  Scale est. = 15.727    n = 2001

##              stdcoef      stdse
## X(Intercept)    0.000000000 0.000000000
## XPDS_score      0.118436912 0.02435617
## Xl0FC_rvsn_ant_z 0.064859093 0.05208107
## Xrace.ethnicity.5levelBlack 0.002547559 0.05173774
## Xrace.ethnicity.5levelMixed 0.079484259 0.04849050
## Xrace.ethnicity.5levelOther 0.026619579 0.03677622
## Xrace.ethnicity.5levelWhite 0.129048318 0.06444503
## Xdemo_race_hispanic1 0.006197629 0.02628834
## Xinterview_age  0.020256001 0.02317621
## XPDS_score:l0FC_rvsn_ant_z -0.070350335 0.05217059

```

## Male participants

```

##
## Family: gaussian
## Link function: identity
##
## Formula:
## cbcl_scr_syn_internal_r ~ PDS_score * l0FC_rvsn_ant_z + race.ethnicity.5level +
##   demo_race_hispanic + interview_age
##
## Parametric coefficients:
##              Estimate Std. Error t value Pr(>|t|)
## (Intercept)    2.42026    2.17280   1.114  0.26546
## PDS_score      0.78810    0.24603   3.203  0.00138 **
## l0FC_rvsn_ant_z -0.10417    0.52320  -0.199  0.84220

```

```

## race.ethnicity.5levelBlack -0.50068    1.01215  -0.495  0.62089
## race.ethnicity.5levelMixed  0.62900    1.00171   0.628  0.53012
## race.ethnicity.5levelOther -0.92145    1.11086  -0.829  0.40692
## race.ethnicity.5levelWhite  0.17931    0.94371   0.190  0.84932
## demo_race_hispanic1         0.95081    0.37923   2.507  0.01225 *
## interview_age                0.01009    0.01629   0.619  0.53589
## PDS_score:lOFC_rvsn_ant_z  -0.02032    0.36631  -0.055  0.95577
## ---
## Signif. codes:  0 '***' 0.001 '**' 0.01 '*' 0.05 '.' 0.1 ' ' 1
##
##
## R-sq.(adj) =  0.00612
## lmer.REML = 12395  Scale est. = 14.017    n = 1989

##                stdcoef    stdse
## X(Intercept)    0.000000000 0.000000000
## XPDS_score      0.074270145 0.02318588
## XlOFC_rvsn_ant_z -0.011500392 0.05776100
## Xrace.ethnicity.5levelBlack -0.027904409 0.05641091
## Xrace.ethnicity.5levelMixed  0.036383272 0.05794174
## Xrace.ethnicity.5levelOther -0.037392582 0.04507855
## Xrace.ethnicity.5levelWhite  0.014731840 0.07753226
## Xdemo_race_hispanic1  0.068029704 0.02713368
## Xinterview_age    0.013801858 0.02229147
## XPDS_score:lOFC_rvsn_ant_z -0.003189956 0.05750798

```

#### 4.5 Model: CBCL internalizing factor ~ PDS x Medial OFC activity (anticipation stage)

##### Female participants

```

##
## Family: gaussian
## Link function: identity
##
## Formula:
## cbcl_scr_syn_internal_r ~ PDS_score * mOFC_rvsn_ant_z + race.ethnicity.5level +
##   demo_race_hispanic + interview_age
##
## Parametric coefficients:
##                Estimate Std. Error t value Pr(>|t|)
## (Intercept)    0.42146    2.04914   0.206   0.8371
## PDS_score      0.88874    0.18142   4.899 1.04e-06 ***
## mOFC_rvsn_ant_z  0.71722    0.43302   1.656   0.0978 .
## race.ethnicity.5levelBlack  0.04807    0.80239   0.060   0.9522
## race.ethnicity.5levelMixed  1.30840    0.79473   1.646   0.0999 .
## race.ethnicity.5levelOther  0.69313    0.93547   0.741   0.4588
## race.ethnicity.5levelWhite  1.52006    0.73372   2.072   0.0384 *
## demo_race_hispanic1  0.07873    0.35818   0.220   0.8260
## interview_age    0.01508    0.01662   0.907   0.3645
## PDS_score:mOFC_rvsn_ant_z -0.28976    0.23681  -1.224   0.2212
## ---
## Signif. codes:  0 '***' 0.001 '**' 0.01 '*' 0.05 '.' 0.1 ' ' 1

```

```
##
##
## R-sq.(adj) = 0.0171
## lmer.REML = 12345 Scale est. = 15.852 n = 2002
```

```
##          stdcoef      stdse
## X(Intercept)      0.00000000 0.00000000
## XPDS_score        0.11985558 0.02446675
## XmOFC_rvsn_ant_z  0.086273433 0.05208738
## Xrace.ethnicity.5levelBlack 0.003114671 0.05199474
## Xrace.ethnicity.5levelMixed 0.079798456 0.04847020
## Xrace.ethnicity.5levelOther 0.027328765 0.03688364
## Xrace.ethnicity.5levelWhite 0.133788558 0.06457867
## Xdemo_race_hispanic1 0.005777241 0.02628198
## Xinterview_age    0.020961492 0.02310778
## XPDS_score:mOFC_rvsn_ant_z -0.063775183 0.05211967
```

### Male participants

```
##
## Family: gaussian
## Link function: identity
##
## Formula:
## cbcl_scr_syn_internal_r ~ PDS_score * mOFC_rvsn_ant_z + race.ethnicity.5level +
##   demo_race_hispanic + interview_age
##
```

```
## Parametric coefficients:
##          Estimate Std. Error t value Pr(>|t|)
## (Intercept)      2.395114   2.178907   1.099 0.271802
## PDS_score         0.883907   0.246051   3.592 0.000336 ***
## mOFC_rvsn_ant_z   0.585278   0.429236   1.364 0.172869
## race.ethnicity.5levelBlack -0.401830   1.014840  -0.396 0.692181
## race.ethnicity.5levelMixed  0.565238   1.004735   0.563 0.573789
## race.ethnicity.5levelOther -0.911887   1.115171  -0.818 0.413621
## race.ethnicity.5levelWhite  0.141791   0.947167   0.150 0.881016
## demo_race_hispanic1  0.915149   0.378878   2.415 0.015807 *
## interview_age     0.009584   0.016346   0.586 0.557713
## PDS_score:mOFC_rvsn_ant_z -0.569479   0.300359  -1.896 0.058106 .
## ---
```

```
## Signif. codes:  0 '***' 0.001 '**' 0.01 '*' 0.05 '.' 0.1 ' ' 1
```

```
##
## R-sq.(adj) = 0.00913
## lmer.REML = 12456 Scale est. = 14.066 n = 1996
```

```
##          stdcoef      stdse
## X(Intercept)      0.00000000 0.00000000
## XPDS_score        0.08311883 0.02313761
## XmOFC_rvsn_ant_z  0.07421407 0.05442772
## Xrace.ethnicity.5levelBlack -0.02239482 0.05655907
## Xrace.ethnicity.5levelMixed  0.03273597 0.05818964
## Xrace.ethnicity.5levelOther -0.03677357 0.04497139
```

```

## Xrace.ethnicity.5levelWhite 0.01162335 0.07764427
## Xdemo_race_hispanic1 0.06502862 0.02692229
## Xinterview_age 0.01302008 0.02220563
## XPDS_score:mOFC_rvsn_ant_z -0.10403604 0.05487148

```

#### 4.6 Model: CBCL internalizing factor ~ PDS x Accumbens activity (feedback)

##### Female participants

```

##
## Family: gaussian
## Link function: identity
##
## Formula:
## cbcl_scr_syn_internal_r ~ PDS_score * accumbens_posvsneg_feedback_z +
##   race.ethnicity.5level + demo_race_hispanic + interview_age
##
## Parametric coefficients:
##
##           Estimate Std. Error t value Pr(>|t|)
## (Intercept)      0.732221   2.043733   0.358   0.7202
## PDS_score         0.897986   0.180161   4.984 6.75e-07
## accumbens_posvsneg_feedback_z 0.258370   0.434089   0.595   0.5518
## race.ethnicity.5levelBlack -0.009524   0.801237  -0.012   0.9905
## race.ethnicity.5levelMixed  1.305136   0.792490   1.647   0.0997
## race.ethnicity.5levelOther  0.607052   0.933486   0.650   0.5156
## race.ethnicity.5levelWhite  1.434905   0.731666   1.961   0.0500
## demo_race_hispanic1  0.086535   0.358899   0.241   0.8095
## interview_age      0.012923   0.016589   0.779   0.4361
## PDS_score:accumbens_posvsneg_feedback_z -0.034845   0.235193  -0.148   0.8822
##
## (Intercept)
## PDS_score          ***
## accumbens_posvsneg_feedback_z
## race.ethnicity.5levelBlack
## race.ethnicity.5levelMixed
## race.ethnicity.5levelOther
## race.ethnicity.5levelWhite
## demo_race_hispanic1
## interview_age
## PDS_score:accumbens_posvsneg_feedback_z
## ---
## Signif. codes:  0 '***' 0.001 '**' 0.01 '*' 0.05 '.' 0.1 ' ' 1
##
##
## R-sq.(adj) = 0.0162
## lmer.REML = 12385 Scale est. = 15.95 n = 2009
##
##           stdcoef      stdse
## X(Intercept) 0.0000000000 0.00000000
## XPDS_score   0.1212657324 0.02432935
## Xaccumbens_posvsneg_feedback_z 0.0326603430 0.05487280
## Xrace.ethnicity.5levelBlack -0.0006177801 0.05197459
## Xrace.ethnicity.5levelMixed  0.0798392540 0.04847910

```

```

## Xrace.ethnicity.5levelOther          0.0239201109 0.03678284
## Xrace.ethnicity.5levelWhite          0.1264516366 0.06447838
## Xdemo_race_hispanic1                 0.0063478867 0.02632745
## Xinterview_age                       0.0179954633 0.02310042
## XPDS_score:accumbens_posvsneg_feedback_z -0.0081468891 0.05498938

```

### Male participants

```

##
## Family: gaussian
## Link function: identity
##
## Formula:
## cbcl_scr_syn_internal_r ~ PDS_score * accumbens_posvsneg_feedback_z +
##   race.ethnicity.5level + demo_race_hispanic + interview_age
##
## Parametric coefficients:
##              Estimate Std. Error t value Pr(>|t|)
## (Intercept)    3.088756   2.190077   1.410 0.158595
## PDS_score       0.911899   0.244935   3.723 0.000202
## accumbens_posvsneg_feedback_z  0.272356   0.470768   0.579 0.562968
## race.ethnicity.5levelBlack -0.500608   1.018583  -0.491 0.623145
## race.ethnicity.5levelMixed  0.623315   1.009298   0.618 0.536927
## race.ethnicity.5levelOther -0.916791   1.122424  -0.817 0.414143
## race.ethnicity.5levelWhite  0.213376   0.951979   0.224 0.822671
## demo_race_hispanic1  0.921473   0.378062   2.437 0.014882
## interview_age    0.003495   0.016450   0.212 0.831784
## PDS_score:accumbens_posvsneg_feedback_z -0.381878   0.337199  -1.133 0.257560
##
## (Intercept)
## PDS_score          ***
## accumbens_posvsneg_feedback_z
## race.ethnicity.5levelBlack
## race.ethnicity.5levelMixed
## race.ethnicity.5levelOther
## race.ethnicity.5levelWhite
## demo_race_hispanic1      *
## interview_age
## PDS_score:accumbens_posvsneg_feedback_z
## ---
## Signif. codes:  0 '***' 0.001 '**' 0.01 '*' 0.05 '.' 0.1 ' ' 1
##
##
## R-sq.(adj) =  0.00903
## lmer.REML = 12526  Scale est. = 15.01    n = 2003

##              stdcoef      stdse
## X(Intercept)    0.00000000 0.00000000
## XPDS_score      0.086151713 0.02314028
## Xaccumbens_posvsneg_feedback_z  0.035609316 0.06155072
## Xrace.ethnicity.5levelBlack -0.028032881 0.05703832
## Xrace.ethnicity.5levelMixed  0.035841382 0.05803587
## Xrace.ethnicity.5levelOther -0.036539695 0.04473539

```

```

## Xrace.ethnicity.5levelWhite          0.017416930 0.07770561
## Xdemo_race_hispanic1                 0.065210346 0.02675449
## Xinterview_age                        0.004721555 0.02222510
## XPDS_score:accumbens_posvsneg_feedback_z -0.069839189 0.06166814

```

#### 4.7 Model: CBCL internalizing factor ~ PDS x Caudate activity (feedback)

##### Female participants

```

##
## Family: gaussian
## Link function: identity
##
## Formula:
## cbcl_scr_syn_internal_r ~ PDS_score * caudate_posvsneg_feedback_z +
##   race.ethnicity.5level + demo_race_hispanic + interview_age
##
## Parametric coefficients:
##
##           Estimate Std. Error t value Pr(>|t|)
## (Intercept)      0.79441    2.04022   0.389  0.6970
## PDS_score         0.90585    0.17932   5.052 4.78e-07 ***
## caudate_posvsneg_feedback_z -0.56189    0.33878  -1.659  0.0974 .
## race.ethnicity.5levelBlack -0.08439    0.80103  -0.105  0.9161
## race.ethnicity.5levelMixed  1.21615    0.79183   1.536  0.1247
## race.ethnicity.5levelOther  0.51918    0.93338   0.556  0.5781
## race.ethnicity.5levelWhite  1.43132    0.73161   1.956  0.0506 .
## demo_race_hispanic1      0.15113    0.35791   0.422  0.6729
## interview_age          0.01242    0.01655   0.751  0.4529
## PDS_score:caudate_posvsneg_feedback_z 0.29937    0.18504   1.618  0.1059
## ---
## Signif. codes:  0 '***' 0.001 '**' 0.01 '*' 0.05 '.' 0.1 ' ' 1
##
##
## R-sq.(adj) =  0.0173
## lmer.REML = 12390  Scale est. = 15.498    n = 2010

##
##           stdcoef      stdse
## X(Intercept)      0.00000000 0.00000000
## XPDS_score        0.12258013 0.02426561
## Xcaudate_posvsneg_feedback_z -0.09080247 0.05474774
## Xrace.ethnicity.5levelBlack -0.00547223 0.05193948
## Xrace.ethnicity.5levelMixed  0.07461985 0.04858489
## Xrace.ethnicity.5levelOther  0.02044871 0.03676229
## Xrace.ethnicity.5levelWhite  0.12618144 0.06449706
## Xdemo_race_hispanic1      0.01111437 0.02632123
## Xinterview_age        0.01729377 0.02303798
## XPDS_score:caudate_posvsneg_feedback_z 0.08862193 0.05477777

```

##### Male participants

```

##
## Family: gaussian

```



```

## Link function: identity
##
## Formula:
## cbcl_scr_syn_internal_r ~ PDS_score * caudate_posvsneg_feedback_z +
##   race.ethnicity.5level + demo_race_hispanic + interview_age
##
## Parametric coefficients:
##
##           Estimate Std. Error t value Pr(>|t|)
## (Intercept)      3.149418   2.184828   1.441 0.149602
## PDS_score         0.882852   0.245486   3.596 0.000331 ***
## caudate_posvsneg_feedback_z
##                   0.218534   0.382566   0.571 0.567906
## race.ethnicity.5levelBlack
##                   -0.476884   1.011376  -0.472 0.637321
## race.ethnicity.5levelMixed
##                   0.581684   1.000476   0.581 0.561032
## race.ethnicity.5levelOther
##                   -0.953144   1.114209  -0.855 0.392408
## race.ethnicity.5levelWhite
##                   0.154671   0.943292   0.164 0.869772
## demo_race_hispanic1
##                   0.914551   0.376759   2.427 0.015295 *
## interview_age
##                   0.003504   0.016424   0.213 0.831063
## PDS_score:caudate_posvsneg_feedback_z
##                   -0.248130   0.270533  -0.917 0.359155
## ---
## Signif. codes:  0 '***' 0.001 '**' 0.01 '*' 0.05 '.' 0.1 ' ' 1
##
##
## R-sq.(adj) =  0.00736
## lmer.REML = 12526  Scale est. = 14.813    n = 2003

##           stdcoef      stdse
## X(Intercept)      0.000000000 0.000000000
## XPDS_score        0.083372880 0.02318265
## Xcaudate_posvsneg_feedback_z
##                   0.034851101 0.06101036
## Xrace.ethnicity.5levelBlack
##                   -0.026696869 0.05661868
## Xrace.ethnicity.5levelMixed
##                   0.033625908 0.05783541
## Xrace.ethnicity.5levelOther
##                   -0.038052581 0.04448280
## Xrace.ethnicity.5levelWhite
##                   0.012652317 0.07716272
## Xdemo_race_hispanic1
##                   0.064891593 0.02673277
## Xinterview_age
##                   0.004747137 0.02224881
## XPDS_score:caudate_posvsneg_feedback_z
##                   -0.056128205 0.06119594

```

#### 4.8 Model: CBCL internalizing factor ~ PDS x Putamen activity (feedback)

##### Female participants

```

##
## Family: gaussian
## Link function: identity
##
## Formula:
## cbcl_scr_syn_internal_r ~ PDS_score * putamen_posvsneg_feedback_z +
##   race.ethnicity.5level + demo_race_hispanic + interview_age
##
## Parametric coefficients:
##
##           Estimate Std. Error t value Pr(>|t|)
## (Intercept)      1.16888   2.03565   0.574   0.566
## PDS_score         0.95437   0.17954   5.316 1.18e-07 ***

```

```

## putamen_posvsneg_feedback_z      -0.56731    0.34726   -1.634    0.102
## race.ethnicity.5levelBlack       -0.32326    0.79406   -0.407    0.684
## race.ethnicity.5levelMixed        1.04020    0.78627    1.323    0.186
## race.ethnicity.5levelOther        0.28592    0.93012    0.307    0.759
## race.ethnicity.5levelWhite        1.21883    0.72519    1.681    0.093
## demo_race_hispanic1               0.11739    0.35894    0.327    0.744
## interview_age                     0.01033    0.01654    0.624    0.533
## PDS_score:putamen_posvsneg_feedback_z 0.28452    0.18772    1.516    0.130
## ---
## Signif. codes:  0 '***' 0.001 '**' 0.01 '*' 0.05 '.' 0.1 ' ' 1
##
##
## R-sq.(adj) =  0.0176
## lmer.REML = 12393  Scale est. = 15.793    n = 2010

```

```

##                                stdcoef    stdse
## X(Intercept)                   0.000000000 0.000000000
## XPDS_score                      0.128848608 0.02423901
## Xputamen_posvsneg_feedback_z   -0.090822656 0.05559326
## Xrace.ethnicity.5levelBlack     -0.020952420 0.05146770
## Xrace.ethnicity.5levelMixed      0.063580939 0.04805953
## Xrace.ethnicity.5levelOther      0.011200420 0.03643609
## Xrace.ethnicity.5levelWhite      0.107333389 0.06386231
## Xdemo_race_hispanic1            0.008596085 0.02628434
## Xinterview_age                   0.014384024 0.02304566
## XPDS_score:putamen_posvsneg_feedback_z 0.084127939 0.05550767

```

## Male participants

```

##
## Family: gaussian
## Link function: identity
##
## Formula:
## cbcl_scr_syn_internal_r ~ PDS_score * putamen_posvsneg_feedback_z +
##   race.ethnicity.5level + demo_race_hispanic + interview_age
##
## Parametric coefficients:
##                                Estimate Std. Error t value Pr(>|t|)
## (Intercept)                   3.114722   2.185689   1.425 0.154298
## PDS_score                      0.869838   0.246327   3.531 0.000423 ***
## putamen_posvsneg_feedback_z    0.116507   0.375657   0.310 0.756484
## race.ethnicity.5levelBlack     -0.423730   1.012755  -0.418 0.675705
## race.ethnicity.5levelMixed      0.605647   1.001732   0.605 0.545514
## race.ethnicity.5levelOther     -0.932281   1.115438  -0.836 0.403369
## race.ethnicity.5levelWhite      0.180709   0.944051   0.191 0.848217
## demo_race_hispanic1            0.864330   0.377408   2.290 0.022115 *
## interview_age                   0.003863   0.016427   0.235 0.814113
## PDS_score:putamen_posvsneg_feedback_z -0.099337   0.261995  -0.379 0.704611
## ---
## Signif. codes:  0 '***' 0.001 '**' 0.01 '*' 0.05 '.' 0.1 ' ' 1
##
##

```

```
## R-sq.(adj) = 0.00676
## lmer.REML = 12562 Scale est. = 15.264 n = 2008
```

```
##          stdcoef      stdse
## X(Intercept)      0.00000000 0.00000000
## XPDS_score        0.082262516 0.02329571
## Xputamen_posvsneg_feedback_z 0.018483930 0.05959801
## Xrace.ethnicity.5levelBlack -0.023630623 0.05647947
## Xrace.ethnicity.5levelMixed 0.034946992 0.05780188
## Xrace.ethnicity.5levelOther -0.037147754 0.044444586
## Xrace.ethnicity.5levelWhite 0.014753571 0.07707503
## Xdemo_race_hispanic1      0.061165569 0.02670784
## Xinterview_age          0.005232681 0.02225210
## XPDS_score:putamen_posvsneg_feedback_z -0.022644964 0.05972447
```

#### 4.9 Model: CBCL internalizing factor ~ PDS x Lateral OFC activity (feedback stage)

##### Female participants

```
##
## Family: gaussian
## Link function: identity
##
## Formula:
## cbcl_scr_syn_internal_r ~ PDS_score * lOFC_posvsneg_feedback_z +
##   race.ethnicity.5level + demo_race_hispanic + interview_age
##
## Parametric coefficients:
##          Estimate Std. Error t value Pr(>|t|)
## (Intercept)      0.92701    2.03846   0.455   0.649
## PDS_score         0.86852    0.18074   4.805 1.66e-06 ***
## lOFC_posvsneg_feedback_z -0.31213    0.56443  -0.553   0.580
## race.ethnicity.5levelBlack -0.19693    0.79360  -0.248   0.804
## race.ethnicity.5levelMixed 0.98903    0.78500   1.260   0.208
## race.ethnicity.5levelOther 0.28542    0.92850   0.307   0.759
## race.ethnicity.5levelWhite 1.18368    0.72395   1.635   0.102
## demo_race_hispanic1      0.12639    0.35805   0.353   0.724
## interview_age          0.01364    0.01659   0.822   0.411
## PDS_score:lOFC_posvsneg_feedback_z 0.17292    0.30096   0.575   0.566
## ---
## Signif. codes:  0 '***' 0.001 '**' 0.01 '*' 0.05 '.' 0.1 ' ' 1
##
##
## R-sq.(adj) = 0.0137
## lmer.REML = 12386 Scale est. = 16.122 n = 2010
##          stdcoef      stdse
## X(Intercept)      0.00000000 0.00000000
## XPDS_score        0.117356547 0.02442173
## XlOFC_posvsneg_feedback_z -0.029449881 0.05325517
## Xrace.ethnicity.5levelBlack -0.012806405 0.05160925
## Xrace.ethnicity.5levelMixed 0.060654456 0.04814192
```

```

## Xrace.ethnicity.5levelOther          0.011218070 0.03649347
## Xrace.ethnicity.5levelWhite          0.104584521 0.06396463
## Xdemo_race_hispanic1                 0.009285686 0.02630585
## Xinterview_age                       0.019041564 0.02316785
## XPDS_score:lOFC_posvsneg_feedback_z 0.030636295 0.05332136

```

### Male participants

```

##
## Family: gaussian
## Link function: identity
##
## Formula:
## cbcl_scr_syn_internal_r ~ PDS_score * lOFC_posvsneg_feedback_z +
##   race.ethnicity.5level + demo_race_hispanic + interview_age
##
## Parametric coefficients:
##
##               Estimate Std. Error t value Pr(>|t|)
## (Intercept)      3.010802   2.186445   1.377 0.168658
## PDS_score         0.840726   0.246796   3.407 0.000671 ***
## lOFC_posvsneg_feedback_z -0.081849   0.568744  -0.144 0.885585
## race.ethnicity.5levelBlack -0.454122   1.017440  -0.446 0.655402
## race.ethnicity.5levelMixed  0.588660   1.007080   0.585 0.558936
## race.ethnicity.5levelOther -0.967371   1.117777  -0.865 0.386901
## race.ethnicity.5levelWhite  0.188614   0.948079   0.199 0.842328
## demo_race_hispanic1  0.925754   0.379740   2.438 0.014862 *
## interview_age      0.004985   0.016427   0.303 0.761556
## PDS_score:lOFC_posvsneg_feedback_z 0.202684   0.383118   0.529 0.596839
## ---
## Signif. codes:  0 '***' 0.001 '**' 0.01 '*' 0.05 '.' 0.1 ' ' 1
##
##
## R-sq.(adj) =  0.00696
## lmer.REML = 12423  Scale est. = 15.194  n = 1989
##
##               stdcoef      stdse
## X(Intercept)      0.00000000 0.00000000
## XPDS_score        0.079298130 0.02327800
## XlOFC_posvsneg_feedback_z -0.007950519 0.05524589
## Xrace.ethnicity.5levelBlack -0.025168324 0.05638851
## Xrace.ethnicity.5levelMixed  0.033796367 0.05781887
## Xrace.ethnicity.5levelOther -0.038863949 0.04490651
## Xrace.ethnicity.5levelWhite  0.015394216 0.07737991
## Xdemo_race_hispanic1  0.065739758 0.02696611
## Xinterview_age     0.006778793 0.02233682
## XPDS_score:lOFC_posvsneg_feedback_z 0.029282421 0.05535043

```

### 4.10 Model: CBCL internalizing factor ~ PDS x Medial OFC activity (feedback stage)

#### Female participants

```
##
```

```

## Family: gaussian
## Link function: identity
##
## Formula:
## cbcl_scr_syn_internal_r ~ PDS_score * mOFC_posvsneg_feedback_z +
##   race.ethnicity.5level + demo_race_hispanic + interview_age
##
## Parametric coefficients:
##
##           Estimate Std. Error t value Pr(>|t|)
## (Intercept)      0.74223    2.03903   0.364  0.7159
## PDS_score         0.89080    0.18011   4.946 8.21e-07 ***
## mOFC_posvsneg_feedback_z
## -0.49262    0.48540  -1.015  0.3103
## race.ethnicity.5levelBlack
## 0.05135    0.80109   0.064  0.9489
## race.ethnicity.5levelMixed
## 1.27777    0.79211   1.613  0.1069
## race.ethnicity.5levelOther
## 0.52956    0.93373   0.567  0.5707
## race.ethnicity.5levelWhite
## 1.44839    0.73158   1.980  0.0479 *
## demo_race_hispanic1
## 0.09621    0.35804   0.269  0.7882
## interview_age
## 0.01285    0.01655   0.776  0.4377
## PDS_score:mOFC_posvsneg_feedback_z
## 0.44003    0.25859   1.702  0.0890 .
## ---
## Signif. codes:  0 '***' 0.001 '**' 0.01 '*' 0.05 '.' 0.1 ' ' 1
##
##
## R-sq.(adj) =  0.0172
## lmer.REML = 12411  Scale est. = 15.619    n = 2014

##           stdcoef      stdse
## X(Intercept)      0.00000000 0.00000000
## XPDS_score        0.120039416 0.02427068
## XmOFC_posvsneg_feedback_z
## -0.054628055 0.05382738
## Xrace.ethnicity.5levelBlack
## 0.003329440 0.05193869
## Xrace.ethnicity.5levelMixed
## 0.078391173 0.04859585
## Xrace.ethnicity.5levelOther
## 0.020748351 0.03658377
## Xrace.ethnicity.5levelWhite
## 0.127674847 0.06448833
## Xdemo_race_hispanic1
## 0.007061548 0.02627893
## Xinterview_age
## 0.017907568 0.02306809
## XPDS_score:mOFC_posvsneg_feedback_z
## 0.091385095 0.05370431

```

## Male participants

```

##
## Family: gaussian
## Link function: identity
##
## Formula:
## cbcl_scr_syn_internal_r ~ PDS_score * mOFC_posvsneg_feedback_z +
##   race.ethnicity.5level + demo_race_hispanic + interview_age
##
## Parametric coefficients:
##
##           Estimate Std. Error t value Pr(>|t|)
## (Intercept)      2.949915    2.179857   1.353 0.176126
## PDS_score         0.844548    0.245622   3.438 0.000597 ***
## mOFC_posvsneg_feedback_z
## -0.111886    0.488217  -0.229 0.818758

```

```

## race.ethnicity.5levelBlack      -0.473855    1.015260   -0.467  0.640742
## race.ethnicity.5levelMixed      0.629701    1.004520    0.627  0.530818
## race.ethnicity.5levelOther     -0.930313    1.114845   -0.834  0.404112
## race.ethnicity.5levelWhite      0.198803    0.946430    0.210  0.833646
## demo_race_hispanic1            0.918843    0.376808    2.438  0.014836 *
## interview_age                   0.005365    0.016377    0.328  0.743249
## PDS_score:m0FC_posvsneg_feedback_z 0.145290    0.335872    0.433  0.665371
## ---
## Signif. codes:  0 '***' 0.001 '**' 0.01 '*' 0.05 '.' 0.1 ' ' 1
##
##
## R-sq.(adj) =  0.00706
## lmer.REML = 12474  Scale est. = 15.237    n = 1998

##                                stdcoef    stdse
## X(Intercept)                   0.00000000 0.00000000
## XPDS_score                      0.079648310 0.02316428
## Xm0FC_posvsneg_feedback_z     -0.012994356 0.05670094
## Xrace.ethnicity.5levelBlack   -0.026360187 0.05647815
## Xrace.ethnicity.5levelMixed    0.036342689 0.05797510
## Xrace.ethnicity.5levelOther   -0.037522282 0.04496501
## Xrace.ethnicity.5levelWhite    0.016278813 0.07749751
## Xdemo_race_hispanic1          0.065495915 0.02685919
## Xinterview_age                 0.007307066 0.02230488
## XPDS_score:m0FC_posvsneg_feedback_z 0.024572161 0.05680454

```

#### 4.11 Model: CBCL internalizing factor ~ PDS x BIS-BAS

##### Female participants

```

##
## Family: gaussian
## Link function: identity
##
## Formula:
## cbcl_scr_syn_internal_r ~ PDS_score * bisbas_ss_basm_rr + race.ethnicity.5level +
##   demo_race_hispanic + interview_age
##
## Parametric coefficients:
##              Estimate Std. Error t value Pr(>|t|)
## (Intercept)   -0.82007    2.00463  -0.409  0.68251
## PDS_score      2.07922    0.54268   3.831  0.00013 ***
## bisbas_ss_basm_rr  0.22482    0.10746   2.092  0.03653 *
## race.ethnicity.5levelBlack -0.20759    0.71808  -0.289  0.77253
## race.ethnicity.5levelMixed  1.23262    0.71707   1.719  0.08574 .
## race.ethnicity.5levelOther  0.33424    0.82728   0.404  0.68623
## race.ethnicity.5levelWhite  0.98373    0.66399   1.482  0.13858
## demo_race_hispanic1  0.25986    0.32109   0.809  0.41842
## interview_age   0.01402    0.01471   0.953  0.34071
## PDS_score:bisbas_ss_basm_rr -0.14543    0.05856  -2.484  0.01307 *
## ---
## Signif. codes:  0 '***' 0.001 '**' 0.01 '*' 0.05 '.' 0.1 ' ' 1
##

```

```
##
## R-sq.(adj) = 0.0143
## lmer.REML = 16130 Scale est. = 17.079 n = 2613
```

```
##          stdcoef      stdse
## X(Intercept)      0.00000000 0.00000000
## XPDS_score        0.28111483 0.07337140
## Xbisbas_ss_basm_rr 0.09975998 0.04768455
## Xrace.ethnicity.5levelBlack -0.01425601 0.04931247
## Xrace.ethnicity.5levelMixed 0.07412920 0.04312407
## Xrace.ethnicity.5levelOther 0.01345996 0.03331444
## Xrace.ethnicity.5levelWhite 0.08754146 0.05908767
## Xdemo_race_hispanic1 0.01887378 0.02332109
## Xinterview_age    0.01935850 0.02031466
## XPDS_score:bisbas_ss_basm_rr -0.21498159 0.08656035
```

### Male participants

```
##
## Family: gaussian
## Link function: identity
##
## Formula:
## cbcl_scr_syn_internal_r ~ PDS_score * bisbas_ss_basm_rr + race.ethnicity.5level +
##   demo_race_hispanic + interview_age
##
```

```
## Parametric coefficients:
##          Estimate Std. Error t value Pr(>|t|)
## (Intercept)      2.64736    2.12801   1.244  0.2136
## PDS_score         1.30648    0.79354   1.646  0.0998
## bisbas_ss_basm_rr 0.02156    0.12021   0.179  0.8576
## race.ethnicity.5levelBlack -0.90753    0.79294  -1.145  0.2525
## race.ethnicity.5levelMixed 0.41465    0.78773   0.526  0.5987
## race.ethnicity.5levelOther -0.88728    0.88639  -1.001  0.3169
## race.ethnicity.5levelWhite -0.06893    0.73750  -0.093  0.9255
## demo_race_hispanic1 0.57431    0.32411   1.772  0.0765
## interview_age     0.01074    0.01411   0.761  0.4467
## PDS_score:bisbas_ss_basm_rr -0.06485    0.08372  -0.775  0.4387
## ---
```

```
## Signif. codes:  0 '***' 0.001 '**' 0.01 '*' 0.05 '.' 0.1 ' ' 1
```

```
##
##
## R-sq.(adj) = 0.00583
## lmer.REML = 17629 Scale est. = 17.075 n = 2817
```

```
##          stdcoef      stdse
## X(Intercept)      0.000000000 0.000000000
## XPDS_score        0.129216578 0.07848416
## Xbisbas_ss_basm_rr 0.008865546 0.04942009
## Xrace.ethnicity.5levelBlack -0.054536450 0.04765043
## Xrace.ethnicity.5levelMixed 0.024087437 0.04576047
## Xrace.ethnicity.5levelOther -0.035299988 0.03526451
## Xrace.ethnicity.5levelWhite -0.005759135 0.06162124
```

```
## Xdemo_race_hispanic1      0.040898100 0.02308067
## Xinterview_age            0.014411219 0.01893509
## XPDS_score:bisbas_ss_basm_rr -0.071488593 0.09229758
```

#### 4.12 Model: CBCL internalizing factor ~ PDS x MID reaction time (large reward vs. neutral)

##### Female participants

```
##
## Family: gaussian
## Link function: identity
##
## Formula:
## cbcl_scr_syn_internal_r ~ PDS_score * rt_diff_large_neutral_z +
##   race.ethnicity.5level + demo_race_hispanic + interview_age
##
## Parametric coefficients:
##
##               Estimate Std. Error t value Pr(>|t|)
## (Intercept)    0.95585    1.97223   0.485    0.628
## PDS_score      1.00003    0.17508   5.712 1.27e-08 ***
## rt_diff_large_neutral_z 0.12550    0.31240   0.402    0.688
## race.ethnicity.5levelBlack -0.42868    0.76687  -0.559    0.576
## race.ethnicity.5levelMixed  0.79246    0.76051   1.042    0.298
## race.ethnicity.5levelOther  0.28941    0.87767   0.330    0.742
## race.ethnicity.5levelWhite  0.94340    0.70278   1.342    0.180
## demo_race_hispanic1  0.25948    0.34763   0.746    0.455
## interview_age    0.01344    0.01610   0.835    0.404
## PDS_score:rt_diff_large_neutral_z -0.03208    0.17169  -0.187    0.852
## ---
## Signif. codes:  0 '***' 0.001 '**' 0.01 '*' 0.05 '.' 0.1 ' ' 1
##
##
## R-sq.(adj) =  0.0172
## lmer.REML = 13443  Scale est. = 17.06    n = 2178

##
##               stdcoef      stdse
## X(Intercept)    0.000000000 0.000000000
## XPDS_score      0.132860230 0.02326017
## Xrt_diff_large_neutral_z 0.021452250 0.05340206
## Xrace.ethnicity.5levelBlack -0.028019198 0.05012395
## Xrace.ethnicity.5levelMixed  0.048429992 0.04647723
## Xrace.ethnicity.5levelOther  0.011915370 0.03613498
## Xrace.ethnicity.5levelWhite  0.083350028 0.06209138
## Xdemo_race_hispanic1  0.019010003 0.02546788
## Xinterview_age    0.018495409 0.02214367
## XPDS_score:rt_diff_large_neutral_z -0.009971141 0.05335881
```

##### Male participants

```
##
## Family: gaussian
```



```

## Link function: identity
##
## Formula:
## cbcl_scr_syn_internal_r ~ PDS_score * rt_diff_large_neutral_z +
##   race.ethnicity.5level + demo_race_hispanic + interview_age
##
## Parametric coefficients:
##
##           Estimate Std. Error t value Pr(>|t|)
## (Intercept)      3.05494    2.06455   1.480  0.13909
## PDS_score         0.86102    0.22570   3.815  0.00014 ***
## rt_diff_large_neutral_z
##           0.75812    0.32473   2.335  0.01965 *
## race.ethnicity.5levelBlack
##          -1.18271    0.94568  -1.251  0.21119
## race.ethnicity.5levelMixed
##          -0.18228    0.94053  -0.194  0.84634
## race.ethnicity.5levelOther
##          -1.45949    1.04063  -1.403  0.16090
## race.ethnicity.5levelWhite
##          -0.46556    0.88370  -0.527  0.59836
## demo_race_hispanic1
##           0.71219    0.35837   1.987  0.04701 *
## interview_age     0.01001    0.01550   0.646  0.51833
## PDS_score:rt_diff_large_neutral_z
##          -0.62565    0.22645  -2.763  0.00578 **
## ---
## Signif. codes:  0 '***' 0.001 '**' 0.01 '*' 0.05 '.' 0.1 ' ' 1
##
##
## R-sq.(adj) =  0.00916
## lmer.REML = 14034  Scale est. = 13.667    n = 2248

##           stdcoef      stdse
## X(Intercept)      0.00000000 0.00000000
## XPDS_score        0.08345122 0.02187509
## Xrt_diff_large_neutral_z
##           0.12485045 0.05347720
## Xrace.ethnicity.5levelBlack
##          -0.06789727 0.05428949
## Xrace.ethnicity.5levelMixed
##          -0.01048183 0.05408346
## Xrace.ethnicity.5levelOther
##          -0.05823251 0.04152043
## Xrace.ethnicity.5levelWhite
##          -0.03832250 0.07274152
## Xdemo_race_hispanic1
##           0.05051042 0.02541625
## Xinterview_age    0.01358778 0.02103308
## XPDS_score:rt_diff_large_neutral_z
##          -0.14827429 0.05366704

```

#### 4.13 Model: CBCL internalizing factor ~ PDS x MID reaction time (large vs. small reward)

##### Female participants

```

##
## Family: gaussian
## Link function: identity
##
## Formula:
## cbcl_scr_syn_internal_r ~ PDS_score * rt_diff_large_small_z +
##   race.ethnicity.5level + demo_race_hispanic + interview_age
##
## Parametric coefficients:
##
##           Estimate Std. Error t value Pr(>|t|)
## (Intercept)      0.95469    1.97005   0.485  0.628

```

```

## PDS_score          0.99961    0.17502    5.711 1.28e-08 ***
## rt_diff_large_small_z    0.13182    0.29169    0.452    0.651
## race.ethnicity.5levelBlack -0.39939    0.76684   -0.521    0.603
## race.ethnicity.5levelMixed  0.82152    0.76058    1.080    0.280
## race.ethnicity.5levelOther  0.31441    0.87735    0.358    0.720
## race.ethnicity.5levelWhite  0.96820    0.70249    1.378    0.168
## demo_race_hispanic1      0.25717    0.34745    0.740    0.459
## interview_age          0.01327    0.01608    0.825    0.410
## PDS_score:rt_diff_large_small_z 0.00451    0.15941    0.028    0.977
## ---
## Signif. codes:  0 '***' 0.001 '**' 0.01 '*' 0.05 '.' 0.1 ' ' 1
##
##
## R-sq.(adj) =  0.0177
## lmer.REML = 13442  Scale est. = 17.021  n = 2178

##                stdcoef      stdse
## X(Intercept)      0.00000000  0.00000000
## XPDS_score        0.132804023  0.02325294
## Xrt_diff_large_small_z 0.023528010  0.05206012
## Xrace.ethnicity.5levelBlack -0.026104901  0.05012214
## Xrace.ethnicity.5levelMixed  0.050205927  0.04648196
## Xrace.ethnicity.5levelOther  0.012944752  0.03612170
## Xrace.ethnicity.5levelWhite  0.085540857  0.06206517
## Xdemo_race_hispanic1  0.018840448  0.02545453
## Xinterview_age     0.018251823  0.02212800
## XPDS_score:rt_diff_large_small_z 0.001474834  0.05212811

```

## Male participants

```

##
## Family: gaussian
## Link function: identity
##
## Formula:
## cbcl_scr_syn_internal_r ~ PDS_score * rt_diff_large_small_z +
##   race.ethnicity.5level + demo_race_hispanic + interview_age
##
## Parametric coefficients:
##                Estimate Std. Error t value Pr(>|t|)
## (Intercept)      3.257857   2.063983   1.578 0.114608
## PDS_score         0.866678   0.226024   3.834 0.000129 ***
## rt_diff_large_small_z 0.308235   0.331032   0.931 0.351884
## race.ethnicity.5levelBlack -1.143317   0.947228  -1.207 0.227555
## race.ethnicity.5levelMixed -0.205018   0.941232  -0.218 0.827590
## race.ethnicity.5levelOther -1.446505   1.041634  -1.389 0.165066
## race.ethnicity.5levelWhite -0.500116   0.884459  -0.565 0.571826
## demo_race_hispanic1  0.734551   0.359205   2.045 0.040978 *
## interview_age     0.008417   0.015495   0.543 0.587029
## PDS_score:rt_diff_large_small_z -0.346620   0.232225  -1.493 0.135682
## ---
## Signif. codes:  0 '***' 0.001 '**' 0.01 '*' 0.05 '.' 0.1 ' ' 1
##

```

```
##
## R-sq.(adj) = 0.00715
## lmer.REML = 14038 Scale est. = 13.663 n = 2248

##                stdcoef      stdse
## X(Intercept)      0.0000000 0.0000000
## XPDS_score        0.0839971 0.02190658
## Xrt_diff_large_small_z 0.05017715 0.05388819
## Xrace.ethnicity.5levelBlack -0.06563570 0.05437863
## Xrace.ethnicity.5levelMixed -0.01178916 0.05412380
## Xrace.ethnicity.5levelOther -0.05771438 0.04156037
## Xrace.ethnicity.5levelWhite -0.04116709 0.07280436
## Xdemo_race_hispanic1 0.05209626 0.02547577
## Xinterview_age    0.01142007 0.02102270
## XPDS_score:rt_diff_large_small_z -0.08105480 0.05430429
```

#### 4.14 Model: CBCL internalizing factor ~ Testosterone x Accumbens activity (anticipation stage) + PDS

##### Female participants

```
##
## Family: gaussian
## Link function: identity
##
## Formula:
## cbcl_scr_syn_internal_r ~ PDS_score + hormone_scr_ert_mean *
##   accumbens_rvsnt_ant_z + race.ethnicity.5level + demo_race_hispanic +
##   interview_age
##
## Parametric coefficients:
##                Estimate Std. Error t value Pr(>|t|)
## (Intercept)      -0.181291  2.081064  -0.087  0.93059
## PDS_score         1.028257  0.190070   5.410 7.13e-08
## hormone_scr_ert_mean -0.002649  0.007808  -0.339  0.73446
## accumbens_rvsnt_ant_z 0.748352  0.395459   1.892  0.05860
## race.ethnicity.5levelBlack -0.489731  0.799326  -0.613  0.54016
## race.ethnicity.5levelMixed 0.901860  0.791070   1.140  0.25441
## race.ethnicity.5levelOther 0.025106  0.942731   0.027  0.97876
## race.ethnicity.5levelWhite 1.193196  0.725804   1.644  0.10035
## demo_race_hispanic1 0.059304  0.364861   0.163  0.87090
## interview_age     0.021642  0.017153   1.262  0.20721
## hormone_scr_ert_mean:accumbens_rvsnt_ant_z -0.025498  0.009632  -2.647  0.00818
##
## (Intercept)
## PDS_score          ***
## hormone_scr_ert_mean
## accumbens_rvsnt_ant_z
## race.ethnicity.5levelBlack
## race.ethnicity.5levelMixed
## race.ethnicity.5levelOther
## race.ethnicity.5levelWhite
## demo_race_hispanic1
```

```

## interview_age
## hormone_scr_ert_mean:accumbens_rvsn_ant_z **
## ---
## Signif. codes:  0 '***' 0.001 '**' 0.01 '*' 0.05 '.' 0.1 ' ' 1
##
##
## R-sq.(adj) =  0.0241
## lmer.REML = 11374 Scale est. = 15.52    n = 1850

##                stdcoef      stdse
## X(Intercept)      0.000000000 0.0000000
## XPDS_score        0.1389781901 0.02568966
## Xhormone_scr_ert_mean -0.0082652052 0.02436346
## Xaccumbens_rvsn_ant_z  0.0977409074 0.05165021
## Xrace.ethnicity.5levelBlack -0.0315021609 0.05141700
## Xrace.ethnicity.5levelMixed  0.0552912412 0.04849888
## Xrace.ethnicity.5levelOther  0.0009950354 0.03736316
## Xrace.ethnicity.5levelWhite  0.1056549000 0.06426839
## Xdemo_race_hispanic1  0.0043767488 0.02692761
## Xinterview_age      0.0303985479 0.02409298
## Xhormone_scr_ert_mean:accumbens_rvsn_ant_z -0.1365559560 0.05158258

```

## Male participants

```

##
## Family: gaussian
## Link function: identity
##
## Formula:
## cbcl_scr_syn_internal_r ~ PDS_score + hormone_scr_ert_mean *
##   accumbens_rvsn_ant_z + race.ethnicity.5level + demo_race_hispanic +
##   interview_age
##
## Parametric coefficients:
##                Estimate Std. Error t value Pr(>|t|)
## (Intercept)      2.971022  2.233067  1.330 0.183529
## PDS_score         0.941721  0.258284  3.646 0.000274
## hormone_scr_ert_mean  0.011646  0.009135  1.275 0.202525
## accumbens_rvsn_ant_z  0.064232  0.415192  0.155 0.877072
## race.ethnicity.5levelBlack -0.559369  1.048266 -0.534 0.593673
## race.ethnicity.5levelMixed  0.379454  1.035112  0.367 0.713973
## race.ethnicity.5levelOther -0.814595  1.151470 -0.707 0.479383
## race.ethnicity.5levelWhite  0.223149  0.974250  0.229 0.818858
## demo_race_hispanic1  0.759191  0.392285  1.935 0.053105
## interview_age      0.001740  0.016952  0.103 0.918262
## hormone_scr_ert_mean:accumbens_rvsn_ant_z -0.005147  0.012451 -0.413 0.679346
##
## (Intercept)
## PDS_score                ***
## hormone_scr_ert_mean
## accumbens_rvsn_ant_z
## race.ethnicity.5levelBlack
## race.ethnicity.5levelMixed

```

```

## race.ethnicity.5levelOther
## race.ethnicity.5levelWhite
## demo_race_hispanic1
## interview_age
## hormone_scr_ert_mean:accumbens_rvsn_ant_z
## ---
## Signif. codes:  0 '***' 0.001 '**' 0.01 '*' 0.05 '.' 0.1 ' ' 1
##
##
## R-sq.(adj) =  0.00679
## lmer.REML = 11577  Scale est. = 14.337    n = 1853

##
##                stdcoef      stdse
## X(Intercept)      0.00000000 0.00000000
## XPDS_score        0.088554592 0.02428767
## Xhormone_scr_ert_mean 0.030435302 0.02387371
## Xaccumbens_rvsn_ant_z 0.008316511 0.05375760
## Xrace.ethnicity.5levelBlack -0.031221518 0.05850959
## Xrace.ethnicity.5levelMixed  0.021808009 0.05949013
## Xrace.ethnicity.5levelOther -0.032493479 0.04593111
## Xrace.ethnicity.5levelWhite  0.018248418 0.07967120
## Xdemo_race_hispanic1  0.053963970 0.02788392
## Xinterview_age      0.002388339 0.02326968
## Xhormone_scr_ert_mean:accumbens_rvsn_ant_z -0.022138028 0.05354841

```

#### 4.15 Model: CBCL internalizing factor ~ Testosterone x Caudate activity (anticipation stage) + PDS

##### Female participants

```

##
## Family: gaussian
## Link function: identity
##
## Formula:
## cbcl_scr_syn_internal_r ~ PDS_score + hormone_scr_ert_mean *
##   caudate_rvsn_ant_z + race.ethnicity.5level + demo_race_hispanic +
##   interview_age
##
## Parametric coefficients:
##
##           Estimate Std. Error t value Pr(>|t|)
## (Intercept)  0.165775  2.091116  0.079  0.9368
## PDS_score    0.995050  0.190494  5.224 1.95e-07
## hormone_scr_ert_mean -0.002227  0.007845 -0.284  0.7765
## caudate_rvsn_ant_z  0.378963  0.306118  1.238  0.2159
## race.ethnicity.5levelBlack -0.474215  0.802532 -0.591  0.5547
## race.ethnicity.5levelMixed  0.913794  0.793343  1.152  0.2495
## race.ethnicity.5levelOther  0.066373  0.947244  0.070  0.9441
## race.ethnicity.5levelWhite  1.221957  0.728462  1.677  0.0936
## demo_race_hispanic1  0.023850  0.365429  0.065  0.9480
## interview_age  0.019016  0.017253  1.102  0.2705
## hormone_scr_ert_mean:caudate_rvsn_ant_z -0.009497  0.007717 -1.231  0.2186
##

```

```

## (Intercept)
## PDS_score ***
## hormone_scr_ert_mean
## caudate_rvsn_ant_z
## race.ethnicity.5levelBlack
## race.ethnicity.5levelMixed
## race.ethnicity.5levelOther
## race.ethnicity.5levelWhite .
## demo_race_hispanic1
## interview_age
## hormone_scr_ert_mean:caudate_rvsn_ant_z
## ---
## Signif. codes:  0 '***' 0.001 '**' 0.01 '*' 0.05 '.' 0.1 ' ' 1
##
##
## R-sq.(adj) =  0.0196
## lmer.REML = 11425  Scale est. = 16.042    n = 1855

##                stdcoef      stdse
## X(Intercept)      0.00000000 0.00000000
## XPDS_score        0.134085354 0.02566951
## Xhormone_scr_ert_mean -0.006933558 0.02442357
## Xcaudate_rvsn_ant_z  0.063093058 0.05096514
## Xrace.ethnicity.5levelBlack -0.030440818 0.05151619
## Xrace.ethnicity.5levelMixed  0.056339908 0.04891349
## Xrace.ethnicity.5levelOther  0.002605980 0.03719149
## Xrace.ethnicity.5levelWhite  0.108059514 0.06441898
## Xdemo_race_hispanic1  0.001759428 0.02695781
## Xinterview_age      0.026637580 0.02416899
## Xhormone_scr_ert_mean:caudate_rvsn_ant_z -0.062561015 0.05083950

```

## Male participants

```

##
## Family: gaussian
## Link function: identity
##
## Formula:
## cbcl_scr_syn_internal_r ~ PDS_score + hormone_scr_ert_mean *
##   caudate_rvsn_ant_z + race.ethnicity.5level + demo_race_hispanic +
##   interview_age
##
## Parametric coefficients:
##                Estimate Std. Error t value Pr(>|t|)
## (Intercept)      2.928668   2.237456   1.309 0.190722
## PDS_score         0.959660   0.260826   3.679 0.000241
## hormone_scr_ert_mean  0.011532   0.009148   1.261 0.207647
## caudate_rvsn_ant_z  0.356827   0.323129   1.104 0.269612
## race.ethnicity.5levelBlack -0.496693   1.049085  -0.473 0.635945
## race.ethnicity.5levelMixed  0.448062   1.035645   0.433 0.665326
## race.ethnicity.5levelOther -0.875764   1.151663  -0.760 0.447092
## race.ethnicity.5levelWhite  0.281966   0.976133   0.289 0.772721
## demo_race_hispanic1  0.829875   0.395562   2.098 0.036044

```

```

## interview_age                0.001742    0.016998    0.103 0.918365
## hormone_scr_ert_mean:caudate_rvsn_ant_z -0.007925    0.009409   -0.842 0.399718
##
## (Intercept)
## PDS_score                    ***
## hormone_scr_ert_mean
## caudate_rvsn_ant_z
## race.ethnicity.5levelBlack
## race.ethnicity.5levelMixed
## race.ethnicity.5levelOther
## race.ethnicity.5levelWhite
## demo_race_hispanic1        *
## interview_age
## hormone_scr_ert_mean:caudate_rvsn_ant_z
## ---
## Signif. codes:  0 '***' 0.001 '**' 0.01 '*' 0.05 '.' 0.1 ' ' 1
##
##
## R-sq.(adj) =  0.00784
## lmer.REML = 11617  Scale est. = 14.352    n = 1858

##                                stdcoef    stdse
## X(Intercept)                   0.000000000 0.000000000
## XPDS_score                     0.089105606 0.02421797
## Xhormone_scr_ert_mean          0.030080725 0.02386404
## Xcaudate_rvsn_ant_z           0.058296260 0.05279085
## Xrace.ethnicity.5levelBlack   -0.027799742 0.05871691
## Xrace.ethnicity.5levelMixed    0.025861040 0.05977485
## Xrace.ethnicity.5levelOther   -0.035137985 0.04620780
## Xrace.ethnicity.5levelWhite    0.023090064 0.07993501
## Xdemo_race_hispanic1          0.058656505 0.02795877
## Xinterview_age                 0.002383725 0.02325423
## Xhormone_scr_ert_mean:caudate_rvsn_ant_z -0.044409617 0.05272303

```

#### 4.16 Model: CBCL internalizing factor ~ Testosterone x Putamen activity (anticipation stage) + PDS

##### Female participants

```

##
## Family: gaussian
## Link function: identity
##
## Formula:
## cbcl_scr_syn_internal_r ~ PDS_score + hormone_scr_ert_mean *
##   putamen_rvsn_ant_z + race.ethnicity.5level + demo_race_hispanic +
##   interview_age
##
## Parametric coefficients:
##                                Estimate Std. Error t value Pr(>|t|)
## (Intercept)                   0.138727   2.090567   0.066   0.9471
## PDS_score                      1.010336   0.190694   5.298 1.31e-07
## hormone_scr_ert_mean          -0.002053   0.007858  -0.261   0.7939

```

```

## putamen_rvs_n_ant_z          0.229449   0.311016   0.738   0.4608
## race.ethnicity.5levelBlack   -0.520634   0.802461  -0.649   0.5166
## race.ethnicity.5levelMixed    0.899355   0.793768   1.133   0.2574
## race.ethnicity.5levelOther    0.009675   0.945429   0.010   0.9918
## race.ethnicity.5levelWhite    1.227171   0.728365   1.685   0.0922
## demo_race_hispanic1          0.017266   0.365130   0.047   0.9623
## interview_age                 0.019075   0.017255   1.105   0.2691
## hormone_scr_ert_mean:putamen_rvs_n_ant_z -0.006497   0.007955  -0.817   0.4142
##
## (Intercept)
## PDS_score                      ***
## hormone_scr_ert_mean
## putamen_rvs_n_ant_z
## race.ethnicity.5levelBlack
## race.ethnicity.5levelMixed
## race.ethnicity.5levelOther
## race.ethnicity.5levelWhite    .
## demo_race_hispanic1
## interview_age
## hormone_scr_ert_mean:putamen_rvs_n_ant_z
## ---
## Signif. codes:  0 '***' 0.001 '**' 0.01 '*' 0.05 '.' 0.1 ' ' 1
##
##
## R-sq.(adj) =  0.0202
## lmer.REML = 11414  Scale est. = 16.009    n = 1853

##                                stdcoef    stdse
## X(Intercept)                   0.000000000 0.00000000
## XPDS_score                      0.1362493251 0.02571620
## Xhormone_scr_ert_mean           -0.0063899970 0.02445485
## Xputamen_rvs_n_ant_z            0.0375247558 0.05086448
## Xrace.ethnicity.5levelBlack     -0.0333764669 0.05144360
## Xrace.ethnicity.5levelMixed     0.0553658299 0.04886572
## Xrace.ethnicity.5levelOther     0.0003821015 0.03733972
## Xrace.ethnicity.5levelWhite     0.1084946559 0.06439504
## Xdemo_race_hispanic1            0.0012754771 0.02697221
## Xinterview_age                  0.0267353943 0.02418432
## Xhormone_scr_ert_mean:putamen_rvs_n_ant_z -0.0415181775 0.05083685

```

## Male participants

```

##
## Family: gaussian
## Link function: identity
##
## Formula:
## cbcl_scr_syn_internal_r ~ PDS_score + hormone_scr_ert_mean *
##   putamen_rvs_n_ant_z + race.ethnicity.5level + demo_race_hispanic +
##   interview_age
##
## Parametric coefficients:
##                                Estimate Std. Error t value Pr(>|t|)

```



```

## (Intercept)                3.0632426  2.2387210   1.368 0.171385
## PDS_score                   0.9716892  0.2611534   3.721 0.000205
## hormone_scr_ert_mean       0.0105792  0.0091274   1.159 0.246580
## putamen_rvsn_ant_z         0.0169489  0.3346578   0.051 0.959613
## race.ethnicity.5levelBlack -0.5776616  1.0494417  -0.550 0.582080
## race.ethnicity.5levelMixed  0.4255411  1.0362474   0.411 0.681373
## race.ethnicity.5levelOther -0.8511298  1.1534642  -0.738 0.460675
## race.ethnicity.5levelWhite  0.2607401  0.9766309   0.267 0.789515
## demo_race_hispanic1        0.7798854  0.3922592   1.988 0.046938
## interview_age               0.0008853  0.0170100   0.052 0.958496
## hormone_scr_ert_mean:putamen_rvsn_ant_z -0.0037217  0.0098086  -0.379 0.704409
##
## (Intercept)
## PDS_score                   ***
## hormone_scr_ert_mean
## putamen_rvsn_ant_z
## race.ethnicity.5levelBlack
## race.ethnicity.5levelMixed
## race.ethnicity.5levelOther
## race.ethnicity.5levelWhite
## demo_race_hispanic1        *
## interview_age
## hormone_scr_ert_mean:putamen_rvsn_ant_z
## ---
## Signif. codes:  0 '***' 0.001 '**' 0.01 '*' 0.05 '.' 0.1 ' ' 1
##
##
## R-sq.(adj) =  0.00749
## lmer.REML = 11617  Scale est. = 14.452    n = 1858

##                stdcoef      stdse
## X(Intercept)    0.00000000 0.00000000
## XPDS_score      0.090360023 0.02428536
## Xhormone_scr_ert_mean 0.027668514 0.02387145
## Xputamen_rvsn_ant_z 0.002744835 0.05419697
## Xrace.ethnicity.5levelBlack -0.032297473 0.05867504
## Xrace.ethnicity.5levelMixed 0.024587933 0.05987478
## Xrace.ethnicity.5levelOther -0.034023374 0.04610900
## Xrace.ethnicity.5levelWhite 0.021353195 0.07998076
## Xdemo_race_hispanic1 0.055241195 0.02778468
## Xinterview_age  0.001211161 0.02327025
## Xhormone_scr_ert_mean:putamen_rvsn_ant_z -0.020500789 0.05402989

```

#### 4.17 Model: CBCL internalizing factor ~ Testosterone x Accumbens activity (feedback stage) + PDS

Female participants

```

##
## Family: gaussian
## Link function: identity
##
## Formula:

```

```

## cbcl_scr_syn_internal_r ~ PDS_score + hormone_scr_ert_mean *
##   accumbens_posvsneg_feedback_z + race.ethnicity.5level + demo_race_hispanic +
##   interview_age
##
## Parametric coefficients:
##
##               Estimate Std. Error t value
## (Intercept)    -0.190478   2.096649  -0.091
## PDS_score       0.960917   0.191780   5.011
## hormone_scr_ert_mean
## -0.001236   0.007857  -0.157
## accumbens_posvsneg_feedback_z
## 0.168432   0.424783   0.397
## race.ethnicity.5levelBlack
## -0.222052   0.810009  -0.274
## race.ethnicity.5levelMixed
## 1.183490   0.799554   1.480
## race.ethnicity.5levelOther
## 0.317332   0.947940   0.335
## race.ethnicity.5levelWhite
## 1.453078   0.734562   1.978
## demo_race_hispanic1
## 0.014620   0.368046   0.040
## interview_age
## 0.020263   0.017274   1.173
## hormone_scr_ert_mean:accumbens_posvsneg_feedback_z
## 0.001104   0.010674   0.103
##
##               Pr(>|t|)
## (Intercept)          0.9276
## PDS_score             5.95e-07 ***
## hormone_scr_ert_mean
## 0.8750
## accumbens_posvsneg_feedback_z
## 0.6918
## race.ethnicity.5levelBlack
## 0.7840
## race.ethnicity.5levelMixed
## 0.1390
## race.ethnicity.5levelOther
## 0.7378
## race.ethnicity.5levelWhite
## 0.0481 *
## demo_race_hispanic1
## 0.9683
## interview_age
## 0.2409
## hormone_scr_ert_mean:accumbens_posvsneg_feedback_z
## 0.9177
## ---
## Signif. codes:  0 '***' 0.001 '**' 0.01 '*' 0.05 '.' 0.1 ' ' 1
##
##
## R-sq.(adj) =  0.0194
## lmer.REML = 11378  Scale est. = 16.001    n = 1848
##
##
##               stdcoef      stdse
## X(Intercept)    0.000000000 0.000000000
## XPDS_score      0.129194427 0.02578463
## Xhormone_scr_ert_mean
## -0.003852145 0.02448146
## Xaccumbens_posvsneg_feedback_z
## 0.021435945 0.05406124
## Xrace.ethnicity.5levelBlack
## -0.014173104 0.05170109
## Xrace.ethnicity.5levelMixed
## 0.072757083 0.04915399
## Xrace.ethnicity.5levelOther
## 0.012632739 0.03773675
## Xrace.ethnicity.5levelWhite
## 0.128406472 0.06491221
## Xdemo_race_hispanic1
## 0.001078976 0.02716198
## Xinterview_age
## 0.028414943 0.02422368
## Xhormone_scr_ert_mean:accumbens_posvsneg_feedback_z
## 0.005569465 0.05386411

```

## Male participants

```

##
## Family: gaussian

```

```

## Link function: identity
##
## Formula:
## cbcl_scr_syn_internal_r ~ PDS_score + hormone_scr_ert_mean *
##   accumbens_posvsneg_feedback_z + race.ethnicity.5level + demo_race_hispanic +
##   interview_age
##
## Parametric coefficients:
##
##               Estimate Std. Error t value
## (Intercept)      3.444893   2.246285   1.534
## PDS_score         0.969873   0.259187   3.742
## hormone_scr_ert_mean 0.009416   0.009150   1.029
## accumbens_posvsneg_feedback_z -0.380898   0.411803  -0.925
## race.ethnicity.5levelBlack -0.637430   1.064034  -0.599
## race.ethnicity.5levelMixed  0.420115   1.051165   0.400
## race.ethnicity.5levelOther -0.993047   1.164515  -0.853
## race.ethnicity.5levelWhite  0.197282   0.992013   0.199
## demo_race_hispanic1  0.800212   0.392623   2.038
## interview_age     -0.001290   0.017026  -0.076
## hormone_scr_ert_mean:accumbens_posvsneg_feedback_z 0.005856   0.012119   0.483
##
##               Pr(>|t|)
## (Intercept)      0.125300
## PDS_score         0.000188 ***
## hormone_scr_ert_mean 0.303559
## accumbens_posvsneg_feedback_z 0.355112
## race.ethnicity.5levelBlack 0.549200
## race.ethnicity.5levelMixed 0.689449
## race.ethnicity.5levelOther 0.393905
## race.ethnicity.5levelWhite 0.842386
## demo_race_hispanic1 0.041680 *
## interview_age     0.939600
## hormone_scr_ert_mean:accumbens_posvsneg_feedback_z 0.629030
## ---
## Signif. codes:  0 '***' 0.001 '**' 0.01 '*' 0.05 '.' 0.1 ' ' 1
##
##
## R-sq.(adj) =  0.00789
## lmer.REML = 11627  Scale est. = 14.272    n = 1859
##
##               stdcoef      stdse
## X(Intercept)      0.000000000 0.000000000
## XPDS_score        0.090490810 0.02418258
## Xhormone_scr_ert_mean 0.024551517 0.02385684
## Xaccumbens_posvsneg_feedback_z -0.049725932 0.05376056
## Xrace.ethnicity.5levelBlack -0.035548230 0.05933907
## Xrace.ethnicity.5levelMixed  0.024164801 0.06046249
## Xrace.ethnicity.5levelOther -0.039973665 0.04687586
## Xrace.ethnicity.5levelWhite  0.016116429 0.08103974
## Xdemo_race_hispanic1  0.056773617 0.02785589
## Xinterview_age     -0.001759647 0.02321967
## Xhormone_scr_ert_mean:accumbens_posvsneg_feedback_z 0.026069997 0.05395584

```

## 4.18 Model: CBCL internalizing factor ~ Testosterone x Caudate activity (Feedback stage) + PDS

Female participants

```
##
## Family: gaussian
## Link function: identity
##
## Formula:
## cbcl_scr_syn_internal_r ~ PDS_score + hormone_scr_ert_mean *
##   caudate_posvsneg_feedback_z + race.ethnicity.5level + demo_race_hispanic +
##   interview_age
##
## Parametric coefficients:
##
##               Estimate Std. Error t value
## (Intercept)    -0.2182413  2.0973786  -0.104
## PDS_score        0.9674477  0.1909243   5.067
## hormone_scr_ert_mean
## caudate_posvsneg_feedback_z
## race.ethnicity.5levelBlack
## race.ethnicity.5levelMixed
## race.ethnicity.5levelOther
## race.ethnicity.5levelWhite
## demo_race_hispanic1
## interview_age
## hormone_scr_ert_mean:caudate_posvsneg_feedback_z
##
##               Pr(>|t|)
## (Intercept)        0.9171
## PDS_score          4.44e-07 ***
## hormone_scr_ert_mean
## caudate_posvsneg_feedback_z
## race.ethnicity.5levelBlack
## race.ethnicity.5levelMixed
## race.ethnicity.5levelOther
## race.ethnicity.5levelWhite
## demo_race_hispanic1
## interview_age
## hormone_scr_ert_mean:caudate_posvsneg_feedback_z
## ---
## Signif. codes:  0 '***' 0.001 '**' 0.01 '*' 0.05 '.' 0.1 ' ' 1
##
##
## R-sq.(adj) =  0.0196
## lmer.REML = 11385  Scale est. = 16.086    n = 1849
##
##               stdcoef    stdse
## X(Intercept)    0.00000000 0.00000000
## XPDS_score      0.130380989 0.02573048
## Xhormone_scr_ert_mean
## Xcaudate_posvsneg_feedback_z
## Xrace.ethnicity.5levelBlack
## Xrace.ethnicity.5levelMixed
## Xrace.ethnicity.5levelOther
```

```

## Xrace.ethnicity.5levelWhite          0.128905272 0.06507197
## Xdemo_race_hispanic1                 0.004945977 0.02714202
## Xinterview_age                       0.028437833 0.02421436
## Xhormone_scr_ert_mean:caudate_posvsneg_feedback_z 0.008432340 0.05343465

```

### Male participants

```

##
## Family: gaussian
## Link function: identity
##
## Formula:
## cbcl_scr_syn_internal_r ~ PDS_score + hormone_scr_ert_mean *
##   caudate_posvsneg_feedback_z + race.ethnicity.5level + demo_race_hispanic +
##   interview_age
##
## Parametric coefficients:
##                               Estimate Std. Error t value
## (Intercept)                   3.465977   2.244693   1.544
## PDS_score                      0.932193   0.259898   3.587
## hormone_scr_ert_mean           0.009852   0.009139   1.078
## caudate_posvsneg_feedback_z   -0.196700  0.327591  -0.600
## race.ethnicity.5levelBlack    -0.601690  1.055714  -0.570
## race.ethnicity.5levelMixed     0.417075  1.040924   0.401
## race.ethnicity.5levelOther    -0.955471  1.156660  -0.826
## race.ethnicity.5levelWhite     0.191056  0.982130   0.195
## demo_race_hispanic1           0.774207  0.391508   1.977
## interview_age                  -0.001332  0.017032  -0.078
## hormone_scr_ert_mean:caudate_posvsneg_feedback_z 0.004552  0.009460   0.481
##                               Pr(>|t|)
## (Intercept)                   0.122741
## PDS_score                      0.000344 ***
## hormone_scr_ert_mean           0.281190
## caudate_posvsneg_feedback_z   0.548285
## race.ethnicity.5levelBlack    0.568790
## race.ethnicity.5levelMixed     0.688704
## race.ethnicity.5levelOther    0.408877
## race.ethnicity.5levelWhite     0.845780
## demo_race_hispanic1           0.048134 *
## interview_age                  0.937662
## hormone_scr_ert_mean:caudate_posvsneg_feedback_z 0.630422
## ---
## Signif. codes:  0 '***' 0.001 '**' 0.01 '*' 0.05 '.' 0.1 ' ' 1
##
##
## R-sq.(adj) = 0.00627
## lmer.REML = 11616 Scale est. = 14.148 n = 1857
##
##                               stdcoef      stdse
## X(Intercept)                   0.000000000 0.000000000
## XPDS_score                      0.086892003 0.02422572
## Xhormone_scr_ert_mean           0.025753964 0.02389128
## Xcaudate_posvsneg_feedback_z   -0.031470577 0.05241234

```

```

## Xrace.ethnicity.5levelBlack          -0.033545706  0.05885868
## Xrace.ethnicity.5levelMixed          0.024129599  0.06022202
## Xrace.ethnicity.5levelOther          -0.038352423  0.04642812
## Xrace.ethnicity.5levelWhite          0.015634556  0.08036985
## Xdemo_race_hispanic1                 0.055028143  0.02782714
## Xinterview_age                       -0.001820504  0.02327427
## Xhormone_scr_ert_mean:caudate_posvsneg_feedback_z  0.025196283  0.05235997

```

#### 4.19 Model: CBCL internalizing factor ~ Testosterone x Putamen activity (Feed-back stage) + PDS

##### Female participants

```

##
## Family: gaussian
## Link function: identity
##
## Formula:
## cbcl_scr_syn_internal_r ~ PDS_score + hormone_scr_ert_mean *
##   putamen_posvsneg_feedback_z + race.ethnicity.5level + demo_race_hispanic +
##   interview_age
##
## Parametric coefficients:
##
##               Estimate Std. Error t value
## (Intercept)    0.118158   2.089886   0.057
## PDS_score      1.024707   0.191144   5.361
## hormone_scr_ert_mean -0.002045   0.007853  -0.260
## putamen_posvsneg_feedback_z  0.083296   0.337089   0.247
## race.ethnicity.5levelBlack -0.486371   0.803308  -0.605
## race.ethnicity.5levelMixed  0.913244   0.793817   1.150
## race.ethnicity.5levelOther -0.045591   0.944110  -0.048
## race.ethnicity.5levelWhite  1.224540   0.728436   1.681
## demo_race_hispanic1    0.100062   0.366661   0.273
## interview_age    0.018886   0.017236   1.096
## hormone_scr_ert_mean:putamen_posvsneg_feedback_z -0.005448   0.008453  -0.645
##
##               Pr(>|t|)
## (Intercept)    0.9549
## PDS_score      9.32e-08 ***
## hormone_scr_ert_mean    0.7946
## putamen_posvsneg_feedback_z  0.8049
## race.ethnicity.5levelBlack  0.5449
## race.ethnicity.5levelMixed  0.2501
## race.ethnicity.5levelOther  0.9615
## race.ethnicity.5levelWhite  0.0929 .
## demo_race_hispanic1    0.7850
## interview_age    0.2734
## hormone_scr_ert_mean:putamen_posvsneg_feedback_z  0.5193
## ---
## Signif. codes:  0 '***' 0.001 '**' 0.01 '*' 0.05 '.' 0.1 ' ' 1
##
##
## R-sq.(adj) =  0.0207
## lmer.REML = 11406  Scale est. = 16.487    n = 1852

```

```

##
##
##          stdcoef      stdse
## X(Intercept)          0.00000000 0.00000000
## XPDS_score           0.137664001 0.02567919
## Xhormone_scr_ert_mean -0.006366430 0.02445197
## Xputamen_posvsneg_feedback_z 0.013264446 0.05367985
## Xrace.ethnicity.5levelBlack -0.031092619 0.05135368
## Xrace.ethnicity.5levelMixed 0.056146235 0.04880387
## Xrace.ethnicity.5levelOther -0.001801638 0.03730880
## Xrace.ethnicity.5levelWhite 0.108183726 0.06435470
## Xdemo_race_hispanic1 0.007371908 0.02701319
## Xinterview_age       0.026492384 0.02417874
## Xhormone_scr_ert_mean:putamen_posvsneg_feedback_z -0.034536143 0.05358400

```

### Male participants

```

##
## Family: gaussian
## Link function: identity
##
## Formula:
## cbcl_scr_syn_internal_r ~ PDS_score + hormone_scr_ert_mean *
##   putamen_posvsneg_feedback_z + race.ethnicity.5level + demo_race_hispanic +
##   interview_age
##
## Parametric coefficients:
##
##          Estimate Std. Error t value
## (Intercept)      3.4212043  2.2432021  1.525
## PDS_score         0.9108598  0.2593916  3.512
## hormone_scr_ert_mean 0.0101042  0.0091255  1.107
## putamen_posvsneg_feedback_z 0.0652580  0.3318316  0.197
## race.ethnicity.5levelBlack -0.5384444  1.0569821 -0.509
## race.ethnicity.5levelMixed 0.4621367  1.0422003  0.443
## race.ethnicity.5levelOther -0.9086726  1.1579139 -0.785
## race.ethnicity.5levelWhite 0.2273192  0.9827489  0.231
## demo_race_hispanic1 0.7256384  0.3922100  1.850
## interview_age     -0.0010137  0.0170283 -0.060
## hormone_scr_ert_mean:putamen_posvsneg_feedback_z -0.0002025  0.0098202 -0.021
##
##          Pr(>|t|)
## (Intercept)      0.127394
## PDS_score         0.000456 ***
## hormone_scr_ert_mean 0.268333
## putamen_posvsneg_feedback_z 0.844115
## race.ethnicity.5levelBlack 0.610521
## race.ethnicity.5levelMixed 0.657511
## race.ethnicity.5levelOther 0.432701
## race.ethnicity.5levelWhite 0.817100
## demo_race_hispanic1 0.064455 .
## interview_age     0.952537
## hormone_scr_ert_mean:putamen_posvsneg_feedback_z 0.983553
## ---
## Signif. codes:  0 '***' 0.001 '**' 0.01 '*' 0.05 '.' 0.1 ' ' 1
##
##

```

```
## R-sq.(adj) = 0.00599
## lmer.REML = 11650 Scale est. = 14.468 n = 1862
```

```
##
##                                stdcoef    stdse
## X(Intercept)                   0.00000000 0.00000000
## XPDS_score                      0.08504802 0.02421969
## Xhormone_scr_ert_mean           0.02640010 0.02384309
## Xputamen_posvsneg_feedback_z    0.01036207 0.05269024
## Xrace.ethnicity.5levelBlack     -0.02989509 0.05868494
## Xrace.ethnicity.5levelMixed     0.02668395 0.06017705
## Xrace.ethnicity.5levelOther    -0.03639825 0.04638198
## Xrace.ethnicity.5levelWhite     0.01856307 0.08025205
## Xdemo_race_hispanic1           0.05142886 0.02779747
## Xinterview_age                  -0.00138511 0.02326782
## Xhormone_scr_ert_mean:putamen_posvsneg_feedback_z -0.00108478 0.05261611
```

#### 4.20 Model: CBCL internalizing factor ~ Testosterone x Lateral OFC activity (anticipation stage) + PDS

##### Female participants

```
##
## Family: gaussian
## Link function: identity
##
## Formula:
## cbcl_scr_syn_internal_r ~ PDS_score + hormone_scr_ert_mean *
##   lOFC_rvsn_ant_z + race.ethnicity.5level + demo_race_hispanic +
##   interview_age
##
## Parametric coefficients:
##
##           Estimate Std. Error t value Pr(>|t|)
## (Intercept) -0.268446  2.100526  -0.128  0.8983
## PDS_score    0.953244  0.192624   4.949 8.15e-07 ***
## hormone_scr_ert_mean -0.001902  0.007873  -0.242  0.8091
## lOFC_rvsn_ant_z    0.501329  0.495476   1.012  0.3118
## race.ethnicity.5levelBlack -0.166435  0.811719  -0.205  0.8376
## race.ethnicity.5levelMixed  1.195701  0.801185   1.492  0.1358
## race.ethnicity.5levelOther  0.403243  0.951844   0.424  0.6719
## race.ethnicity.5levelWhite  1.486237  0.735959   2.019  0.0436 *
## demo_race_hispanic1    0.002524  0.367034   0.007  0.9945
## interview_age        0.021066  0.017312   1.217  0.2238
## hormone_scr_ert_mean:lOFC_rvsn_ant_z -0.009990  0.012957  -0.771  0.4408
## ---
## Signif. codes:  0 '***' 0.001 '**' 0.01 '*' 0.05 '.' 0.1 ' ' 1
##
##
## R-sq.(adj) = 0.0189
## lmer.REML = 11345 Scale est. = 15.991 n = 1842
##
##                                stdcoef    stdse
## X(Intercept)                   0.0000000000 0.00000000
## XPDS_score                      0.1278516846 0.02583520
```



```

## Xhormone_scr_ert_mean -0.0059243780 0.02451841
## XlOFC_rvsn_ant_z 0.0524735728 0.05186100
## Xrace.ethnicity.5levelBlack -0.0105915542 0.05165602
## Xrace.ethnicity.5levelMixed 0.0734021160 0.04918341
## Xrace.ethnicity.5levelOther 0.0159753798 0.03770947
## Xrace.ethnicity.5levelWhite 0.1311092043 0.06492304
## Xdemo_race_hispanic1 0.0001861502 0.02706619
## Xinterview_age 0.0295293385 0.02426700
## Xhormone_scr_ert_mean:lOFC_rvsn_ant_z -0.0400247798 0.05191245

```

### Male participants

```

##
## Family: gaussian
## Link function: identity
##
## Formula:
## cbcl_scr_syn_internal_r ~ PDS_score + hormone_scr_ert_mean *
##   lOFC_rvsn_ant_z + race.ethnicity.5level + demo_race_hispanic +
##   interview_age
##
## Parametric coefficients:
##
##           Estimate Std. Error t value Pr(>|t|)
## (Intercept) 2.891112  2.229670  1.297  0.19491
## PDS_score 0.842111  0.260970  3.227  0.00127 **
## hormone_scr_ert_mean 0.010887  0.009072  1.200  0.23027
## lOFC_rvsn_ant_z 0.329895  0.470479  0.701  0.48327
## race.ethnicity.5levelBlack -0.668096  1.054888 -0.633  0.52660
## race.ethnicity.5levelMixed 0.401557  1.040518  0.386  0.69960
## race.ethnicity.5levelOther -0.923551  1.151088 -0.802  0.42247
## race.ethnicity.5levelWhite 0.184257  0.980977  0.188  0.85103
## demo_race_hispanic1 0.768203  0.392387  1.958  0.05041 .
## interview_age 0.003968  0.016886  0.235  0.81424
## hormone_scr_ert_mean:lOFC_rvsn_ant_z -0.015283  0.013037 -1.172  0.24122
## ---
## Signif. codes:  0 '***' 0.001 '**' 0.01 '*' 0.05 '.' 0.1 ' ' 1
##
##
## R-sq.(adj) = 0.00656
## lmer.REML = 11497 Scale est. = 14.294 n = 1845
##
##           stdcoef      stdse
## X(Intercept) 0.00000000 0.00000000
## XPDS_score 0.078260764 0.02425300
## Xhormone_scr_ert_mean 0.028764952 0.02396965
## XlOFC_rvsn_ant_z 0.036472965 0.05201584
## Xrace.ethnicity.5levelBlack -0.037148298 0.05865522
## Xrace.ethnicity.5levelMixed 0.023343517 0.06048788
## Xrace.ethnicity.5levelOther -0.037732930 0.04702927
## Xrace.ethnicity.5levelWhite 0.015177014 0.08080190
## Xdemo_race_hispanic1 0.055165308 0.02817762
## Xinterview_age 0.005484628 0.02333986
## Xhormone_scr_ert_mean:lOFC_rvsn_ant_z -0.060981212 0.05201763

```

## 4.21 Model: CBCL internalizing factor ~ Testosterone x Medial OFC activity (anticipation stage) + PDS

### Female participants

```
##
## Family: gaussian
## Link function: identity
##
## Formula:
## cbcl_scr_syn_internal_r ~ PDS_score + hormone_scr_ert_mean *
##   mOFC_rvsn_ant_z + race.ethnicity.5level + demo_race_hispanic +
##   interview_age
##
## Parametric coefficients:
##               Estimate Std. Error t value Pr(>|t|)
## (Intercept)   -0.335356  2.103623  -0.159   0.873
## PDS_score      0.953065  0.192757   4.944 8.34e-07 ***
## hormone_scr_ert_mean
## mOFC_rvsn_ant_z
## race.ethnicity.5levelBlack
## race.ethnicity.5levelMixed
## race.ethnicity.5levelOther
## race.ethnicity.5levelWhite
## demo_race_hispanic1
## interview_age
## hormone_scr_ert_mean:mOFC_rvsn_ant_z
## ---
## Signif. codes:  0 '***' 0.001 '**' 0.01 '*' 0.05 '.' 0.1 ' ' 1
##
##
## R-sq.(adj) =  0.019
## lmer.REML = 11351  Scale est. = 15.87    n = 1843

##               stdcoef      stdse
## X(Intercept)   0.000000000 0.00000000
## XPDS_score     0.1279704547 0.02588203
## Xhormone_scr_ert_mean
## XmOFC_rvsn_ant_z
## Xrace.ethnicity.5levelBlack
## Xrace.ethnicity.5levelMixed
## Xrace.ethnicity.5levelOther
## Xrace.ethnicity.5levelWhite
## Xdemo_race_hispanic1
## Xinterview_age
## Xhormone_scr_ert_mean:mOFC_rvsn_ant_z
```

### Male participants

```
##
## Family: gaussian
## Link function: identity
##
```

```

## Formula:
## cbcl_scr_syn_internal_r ~ PDS_score + hormone_scr_ert_mean *
##   mOFC_rvsn_ant_z + race.ethnicity.5level + demo_race_hispanic +
##   interview_age
##
## Parametric coefficients:
##
##           Estimate Std. Error t value Pr(>|t|)
## (Intercept)      2.732943   2.241645   1.219 0.222937
## PDS_score         0.918333   0.261391   3.513 0.000453 ***
## hormone_scr_ert_mean
## mOFC_rvsn_ant_z  -0.080535   0.406891  -0.198 0.843123
## race.ethnicity.5levelBlack
## race.ethnicity.5levelMixed
## race.ethnicity.5levelOther
## race.ethnicity.5levelWhite
## demo_race_hispanic1
## interview_age     0.004231   0.016984   0.249 0.803280
## hormone_scr_ert_mean:mOFC_rvsn_ant_z -0.002629   0.011546  -0.228 0.819926
## ---
## Signif. codes:  0 '***' 0.001 '**' 0.01 '*' 0.05 '.' 0.1 ' ' 1
##
##
## R-sq.(adj) =  0.00596
## lmer.REML = 11551  Scale est. = 14.216    n = 1850

##           stdcoef      stdse
## X(Intercept)      0.000000000 0.000000000
## XPDS_score        0.085168372 0.02424198
## Xhormone_scr_ert_mean
## XmOFC_rvsn_ant_z  -0.010173777 0.05140129
## Xrace.ethnicity.5levelBlack
## Xrace.ethnicity.5levelMixed
## Xrace.ethnicity.5levelOther
## Xrace.ethnicity.5levelWhite
## Xdemo_race_hispanic1
## Xinterview_age     0.005802362 0.02328953
## Xhormone_scr_ert_mean:mOFC_rvsn_ant_z -0.011738873 0.05156027

```

## 4.22 Model: CBCL internalizing factor ~ Testosterone x Lateral OFC activity (feedback stage) + PDS

### Female participants

```

##
## Family: gaussian
## Link function: identity
##
## Formula:
## cbcl_scr_syn_internal_r ~ PDS_score + hormone_scr_ert_mean *
##   lOFC_posvsneg_feedback_z + race.ethnicity.5level + demo_race_hispanic +
##   interview_age
##
## Parametric coefficients:

```

```

##                               Estimate Std. Error t value
## (Intercept)                   -0.044937   2.092752  -0.021
## PDS_score                       0.925586   0.192200   4.816
## hormone_scr_ert_mean            -0.001409   0.007855  -0.179
## lOFC_posvsneg_feedback_z        0.007051   0.551494   0.013
## race.ethnicity.5levelBlack      -0.395454   0.802080  -0.493
## race.ethnicity.5levelMixed       0.886869   0.792606   1.119
## race.ethnicity.5levelOther      -0.015041   0.943164  -0.016
## race.ethnicity.5levelWhite       1.204774   0.726589   1.658
## demo_race_hispanic1             0.062441   0.366832   0.170
## interview_age                   0.021466   0.017291   1.241
## hormone_scr_ert_mean:lOFC_posvsneg_feedback_z -0.002902   0.014645  -0.198
##                               Pr(>|t|)
## (Intercept)                    0.9829
## PDS_score                       1.59e-06 ***
## hormone_scr_ert_mean            0.8576
## lOFC_posvsneg_feedback_z        0.9898
## race.ethnicity.5levelBlack       0.6220
## race.ethnicity.5levelMixed       0.2633
## race.ethnicity.5levelOther       0.9873
## race.ethnicity.5levelWhite       0.0975 .
## demo_race_hispanic1             0.8649
## interview_age                   0.2146
## hormone_scr_ert_mean:lOFC_posvsneg_feedback_z 0.8430
## ---
## Signif. codes:  0 '***' 0.001 '**' 0.01 '*' 0.05 '.' 0.1 ' ' 1
##
##
## R-sq.(adj) = 0.0166
## lmer.REML = 11373 Scale est. = 16.334    n = 1848

##                               stdcoef    stdse
## X(Intercept)                   0.000000000 0.00000000
## XPDS_score                      0.1244900328 0.02585069
## Xhormone_scr_ert_mean           -0.0043951804 0.02449627
## XlOFC_posvsneg_feedback_z       0.0006557489 0.05129109
## Xrace.ethnicity.5levelBlack     -0.0253100900 0.05133526
## Xrace.ethnicity.5levelMixed      0.0546712212 0.04886035
## Xrace.ethnicity.5levelOther     -0.0005971492 0.03744558
## Xrace.ethnicity.5levelWhite      0.1067558820 0.06438361
## Xdemo_race_hispanic1            0.0046158893 0.02711757
## Xinterview_age                  0.0301766957 0.02430784
## Xhormone_scr_ert_mean:lOFC_posvsneg_feedback_z -0.0101490938 0.05121960

```

## Male participants

```

##
## Family: gaussian
## Link function: identity
##
## Formula:
## cbcl_scr_syn_internal_r ~ PDS_score + hormone_scr_ert_mean *
##   lOFC_posvsneg_feedback_z + race.ethnicity.5level + demo_race_hispanic +

```

```

##      interview_age
##
## Parametric coefficients:
##
##              Estimate Std. Error t value
## (Intercept)      3.3821100  2.2425897  1.508
## PDS_score         0.9037521  0.2611570  3.461
## hormone_scr_ert_mean 0.0106303  0.0091154  1.166
## lOFC_posvsneg_feedback_z 0.0444634  0.5295193  0.084
## race.ethnicity.5levelBlack -0.6391895  1.0637349 -0.601
## race.ethnicity.5levelMixed  0.4108271  1.0483152  0.392
## race.ethnicity.5levelOther -0.9633903  1.1604815 -0.830
## race.ethnicity.5levelWhite  0.2085606  0.9879463  0.211
## demo_race_hispanic1      0.7762967  0.3944475  1.968
## interview_age         -0.0004695  0.0170015 -0.028
## hormone_scr_ert_mean:lOFC_posvsneg_feedback_z 0.0058190  0.0149572  0.389
##
##              Pr(>|t|)
## (Intercept)         0.131694
## PDS_score            0.000551 ***
## hormone_scr_ert_mean 0.243688
## lOFC_posvsneg_feedback_z 0.933090
## race.ethnicity.5levelBlack 0.547986
## race.ethnicity.5levelMixed 0.695183
## race.ethnicity.5levelOther 0.406554
## race.ethnicity.5levelWhite 0.832829
## demo_race_hispanic1      0.049212 *
## interview_age         0.977971
## hormone_scr_ert_mean:lOFC_posvsneg_feedback_z 0.697287
## ---
## Signif. codes:  0 '***' 0.001 '**' 0.01 '*' 0.05 '.' 0.1 ' ' 1
##
##
## R-sq.(adj) =  0.00623
## lmer.REML = 11515  Scale est. = 14.231  n = 1844

##
##              stdcoef      stdse
## X(Intercept)      0.000000000  0.00000000
## XPDS_score        0.0841017340  0.02430286
## Xhormone_scr_ert_mean 0.0279390510  0.02395747
## XlOFC_posvsneg_feedback_z 0.0043392492  0.05167662
## Xrace.ethnicity.5levelBlack -0.0352509079  0.05866432
## Xrace.ethnicity.5levelMixed  0.0236456850  0.06033713
## Xrace.ethnicity.5levelOther -0.0389431070  0.04691012
## Xrace.ethnicity.5levelWhite  0.0170392495  0.08071449
## Xdemo_race_hispanic1      0.0552414329  0.02806897
## Xinterview_age       -0.0006446586  0.02334362
## Xhormone_scr_ert_mean:lOFC_posvsneg_feedback_z 0.0201473703  0.05178655

```

#### 4.23 Model: CBCL internalizing factor ~ Testosterone x Medial OFC activity (feedback stage) + PDS

Female participants

```
##
```

```

## Family: gaussian
## Link function: identity
##
## Formula:
## cbcl_scr_syn_internal_r ~ PDS_score + hormone_scr_ert_mean *
##   mOFC_posvsneg_feedback_z + race.ethnicity.5level + demo_race_hispanic +
##   interview_age
##
## Parametric coefficients:
##
##           Estimate Std. Error t value
## (Intercept)      -0.314760   2.093249  -0.150
## PDS_score          0.954451   0.191597   4.982
## hormone_scr_ert_mean -0.001444   0.007850  -0.184
## mOFC_posvsneg_feedback_z  0.425476   0.479556   0.887
## race.ethnicity.5levelBlack -0.145210   0.809952  -0.179
## race.ethnicity.5levelMixed  1.225959   0.799258   1.534
## race.ethnicity.5levelOther  0.225314   0.948784   0.237
## race.ethnicity.5levelWhite  1.475471   0.734587   2.009
## demo_race_hispanic1    0.036169   0.366841   0.099
## interview_age         0.021263   0.017250   1.233
## hormone_scr_ert_mean:mOFC_posvsneg_feedback_z -0.006730   0.012439  -0.541
##
##           Pr(>|t|)
## (Intercept)          0.8805
## PDS_score             6.9e-07 ***
## hormone_scr_ert_mean  0.8540
## mOFC_posvsneg_feedback_z  0.3751
## race.ethnicity.5levelBlack  0.8577
## race.ethnicity.5levelMixed  0.1252
## race.ethnicity.5levelOther  0.8123
## race.ethnicity.5levelWhite  0.0447 *
## demo_race_hispanic1    0.9215
## interview_age         0.2179
## hormone_scr_ert_mean:mOFC_posvsneg_feedback_z  0.5886
## ---
## Signif. codes:  0 '***' 0.001 '**' 0.01 '*' 0.05 '.' 0.1 ' ' 1
##
##
## R-sq.(adj) =  0.019
## lmer.REML = 11407  Scale est. = 16.118    n = 1853
##
##
##           stdcoef      stdse
## X(Intercept)      0.000000000 0.000000000
## XPDS_score        0.128352481 0.02576556
## Xhormone_scr_ert_mean -0.004492190 0.02441558
## XmOFC_posvsneg_feedback_z  0.047172633 0.05316858
## Xrace.ethnicity.5levelBlack -0.009278331 0.05175266
## Xrace.ethnicity.5levelMixed  0.075602429 0.04928865
## Xrace.ethnicity.5levelOther  0.008914153 0.03753696
## Xrace.ethnicity.5levelWhite  0.130468821 0.06495598
## Xdemo_race_hispanic1  0.002670764 0.02708800
## Xinterview_age     0.029828940 0.02419954
## Xhormone_scr_ert_mean:mOFC_posvsneg_feedback_z -0.028800309 0.05323414

```

## Male participants

```
##
## Family: gaussian
## Link function: identity
##
## Formula:
## cbcl_scr_syn_internal_r ~ PDS_score + hormone_scr_ert_mean *
##   mOFC_posvsneg_feedback_z + race.ethnicity.5level + demo_race_hispanic +
##   interview_age
##
## Parametric coefficients:
##
##           Estimate Std. Error t value
## (Intercept)      3.2404858  2.2355838  1.450
## PDS_score         0.9119659  0.2603544  3.503
## hormone_scr_ert_mean 0.0119804  0.0090956  1.317
## mOFC_posvsneg_feedback_z -0.4701557  0.4399350 -1.069
## race.ethnicity.5levelBlack -0.7177073  1.0605834 -0.677
## race.ethnicity.5levelMixed  0.4228034  1.0452461  0.405
## race.ethnicity.5levelOther -0.9602210  1.1572107 -0.830
## race.ethnicity.5levelWhite  0.1925760  0.9856307  0.195
## demo_race_hispanic1  0.7790182  0.3912546  1.991
## interview_age      0.0004702  0.0169469  0.028
## hormone_scr_ert_mean:mOFC_posvsneg_feedback_z 0.0187015  0.0125052  1.496
##
##           Pr(>|t|)
## (Intercept)      0.147368
## PDS_score         0.000471 ***
## hormone_scr_ert_mean 0.187945
## mOFC_posvsneg_feedback_z 0.285348
## race.ethnicity.5levelBlack 0.498675
## race.ethnicity.5levelMixed 0.685891
## race.ethnicity.5levelOther 0.406775
## race.ethnicity.5levelWhite 0.845114
## demo_race_hispanic1 0.046620 *
## interview_age      0.977867
## hormone_scr_ert_mean:mOFC_posvsneg_feedback_z 0.134955
## ---
## Signif. codes:  0 '***' 0.001 '**' 0.01 '*' 0.05 '.' 0.1 ' ' 1
##
##
## R-sq.(adj) =  0.00751
## lmer.REML = 11547  Scale est. = 14.247    n = 1850

##
##           stdcoef      stdse
## X(Intercept)      0.000000000  0.00000000
## XPDS_score        0.084848494  0.02422315
## Xhormone_scr_ert_mean 0.031516334  0.02392728
## XmOFC_posvsneg_feedback_z -0.054488517  0.05098610
## Xrace.ethnicity.5levelBlack -0.039747584  0.05873652
## Xrace.ethnicity.5levelMixed  0.024426163  0.06038588
## Xrace.ethnicity.5levelOther -0.038983790  0.04698133
## Xrace.ethnicity.5levelWhite  0.015778362  0.08075584
## Xdemo_race_hispanic1  0.055661010  0.02795522
## Xinterview_age     0.000646281  0.02329168
```

```
## Xhormone_scr_ert_mean:mOFC_posvsneg_feedback_z 0.0763436863 0.05104881
```

#### 4.24 Model: CBCL internalizing factor ~ Testosterone x BIS-BAS RR + PDS

##### Female participants

```
##
## Family: gaussian
## Link function: identity
##
## Formula:
## cbcl_scr_syn_internal_r ~ PDS_score + hormone_scr_ert_mean *
##   bisbas_ss_basm_rr + race.ethnicity.5level + demo_race_hispanic +
##   interview_age
##
## Parametric coefficients:
##
##           Estimate Std. Error t value Pr(>|t|)
## (Intercept) -0.530598  2.090056  -0.254   0.800
## PDS_score    0.864135  0.169223   5.106 3.54e-07
## hormone_scr_ert_mean 0.026192  0.025996   1.008   0.314
## bisbas_ss_basm_rr  0.091454  0.107910   0.848   0.397
## race.ethnicity.5levelBlack -0.424060  0.728587  -0.582   0.561
## race.ethnicity.5levelMixed  1.164004  0.726406   1.602   0.109
## race.ethnicity.5levelOther  0.225036  0.843315   0.267   0.790
## race.ethnicity.5levelWhite  0.991807  0.669711   1.481   0.139
## demo_race_hispanic1  0.175401  0.330640   0.530   0.596
## interview_age  0.021104  0.015400   1.370   0.171
## hormone_scr_ert_mean:bisbas_ss_basm_rr -0.003168  0.002824  -1.122   0.262
##
## (Intercept)
## PDS_score          ***
## hormone_scr_ert_mean
## bisbas_ss_basm_rr
## race.ethnicity.5levelBlack
## race.ethnicity.5levelMixed
## race.ethnicity.5levelOther
## race.ethnicity.5levelWhite
## demo_race_hispanic1
## interview_age
## hormone_scr_ert_mean:bisbas_ss_basm_rr
## ---
## Signif. codes:  0 '***' 0.001 '**' 0.01 '*' 0.05 '.' 0.1 ' ' 1
##
##
## R-sq.(adj) = 0.0149
## lmer.REML = 14837 Scale est. = 17.701 n = 2402
##
##           stdcoef      stdse
## X(Intercept) 0.00000000 0.00000000
## XPDS_score   0.11545922 0.02261028
## Xhormone_scr_ert_mean 0.07982666 0.07923060
## Xbisbas_ss_basm_rr  0.04052063 0.04781192
## Xrace.ethnicity.5levelBlack -0.02847250 0.04891917
```



```

## Xrace.ethnicity.5levelMixed          0.07020298 0.04381071
## Xrace.ethnicity.5levelOther          0.00912452 0.03419382
## Xrace.ethnicity.5levelWhite          0.08801248 0.05942978
## Xdemo_race_hispanic1                 0.01278432 0.02409909
## Xinterview_age                       0.02924195 0.02133847
## Xhormone_scr_ert_mean:bisbas_ss_basm_rr -0.10159039 0.09056734

```

### Male participants

```

##
## Family: gaussian
## Link function: identity
##
## Formula:
## cbcl_scr_syn_internal_r ~ PDS_score + hormone_scr_ert_mean *
##   bisbas_ss_basm_rr + race.ethnicity.5level + demo_race_hispanic +
##   interview_age
##
## Parametric coefficients:
##               Estimate Std. Error t value Pr(>|t|)
## (Intercept)    3.541810   2.130549   1.662 0.09655
## PDS_score       0.770185   0.208179   3.700 0.00022
## hormone_scr_ert_mean 0.018870   0.028738   0.657 0.51148
## bisbas_ss_basm_rr -0.026812   0.108613  -0.247 0.80504
## race.ethnicity.5levelBlack -1.003452   0.815218  -1.231 0.21847
## race.ethnicity.5levelMixed  0.260081   0.807094   0.322 0.74729
## race.ethnicity.5levelOther -0.736114   0.906751  -0.812 0.41697
## race.ethnicity.5levelWhite -0.009121   0.755209  -0.012 0.99036
## demo_race_hispanic1  0.410597   0.332495   1.235 0.21698
## interview_age     0.004335   0.014488   0.299 0.76480
## hormone_scr_ert_mean:bisbas_ss_basm_rr -0.001179   0.003129  -0.377 0.70628
##
## (Intercept)      .
## PDS_score         ***
## hormone_scr_ert_mean
## bisbas_ss_basm_rr
## race.ethnicity.5levelBlack
## race.ethnicity.5levelMixed
## race.ethnicity.5levelOther
## race.ethnicity.5levelWhite
## demo_race_hispanic1
## interview_age
## hormone_scr_ert_mean:bisbas_ss_basm_rr
## ---
## Signif. codes:  0 '***' 0.001 '**' 0.01 '*' 0.05 '.' 0.1 ' ' 1
##
##
## R-sq.(adj) =  0.00473
## lmer.REML = 16313  Scale est. = 15.538    n = 2614
##
##               stdcoef      stdse
## X(Intercept)  0.000000000 0.0000000
## XPDS_score    0.0757642639 0.02047886

```

```

## Xhormone_scr_ert_mean          0.0503573544 0.07669158
## Xbisbas_ss_basm_rr            -0.0111410122 0.04513166
## Xrace.ethnicity.5levelBlack   -0.0602361205 0.04893667
## Xrace.ethnicity.5levelMixed    0.0152234611 0.04724204
## Xrace.ethnicity.5levelOther   -0.0297382850 0.03663183
## Xrace.ethnicity.5levelWhite   -0.0007676174 0.06355737
## Xdemo_race_hispanic1         0.0295746037 0.02394908
## Xinterview_age                0.0059123612 0.01975949
## Xhormone_scr_ert_mean:bisbas_ss_basm_rr -0.0324415348 0.08607420

```

#### 4.25 Model: CBCL internalizing factor ~ Testosterone x MID Reaction Time + PDS (large reward vs. neutral)

##### Female participants

```

##
## Family: gaussian
## Link function: identity
##
## Formula:
## cbcl_scr_syn_internal_r ~ PDS_score + hormone_scr_ert_mean *
##   rt_diff_large_neutral_z + race.ethnicity.5level + demo_race_hispanic +
##   interview_age
##
## Parametric coefficients:
##
##           Estimate Std. Error t value
## (Intercept)      0.042720   2.026723   0.021
## PDS_score         1.065186   0.186508   5.711
## hormone_scr_ert_mean -0.002569   0.007697  -0.334
## rt_diff_large_neutral_z -0.287147   0.292287  -0.982
## race.ethnicity.5levelBlack -0.666256   0.777076  -0.857
## race.ethnicity.5levelMixed  0.643475   0.769832   0.836
## race.ethnicity.5levelOther  0.053665   0.891478   0.060
## race.ethnicity.5levelWhite  0.922364   0.707373   1.304
## demo_race_hispanic1  0.207978   0.356637   0.583
## interview_age      0.021349   0.016786   1.272
## hormone_scr_ert_mean:rt_diff_large_neutral_z  0.013061   0.007519   1.737
##
##           Pr(>|t|)
## (Intercept)      0.9832
## PDS_score         1.29e-08 ***
## hormone_scr_ert_mean      0.7386
## rt_diff_large_neutral_z  0.3260
## race.ethnicity.5levelBlack  0.3913
## race.ethnicity.5levelMixed  0.4033
## race.ethnicity.5levelOther  0.9520
## race.ethnicity.5levelWhite  0.1924
## demo_race_hispanic1      0.5598
## interview_age      0.2036
## hormone_scr_ert_mean:rt_diff_large_neutral_z  0.0826 .
## ---
## Signif. codes:  0 '***' 0.001 '**' 0.01 '*' 0.05 '.' 0.1 ' ' 1
##
##

```

```
## R-sq.(adj) = 0.0216
## lmer.REML = 12398 Scale est. = 16.797 n = 2010
```

|                                                  | stdcoef      | stdse      |
|--------------------------------------------------|--------------|------------|
| ## X(Intercept)                                  | 0.000000000  | 0.00000000 |
| ## XPDS_score                                    | 0.140203722  | 0.02454889 |
| ## Xhormone_scr_ert_mean                         | -0.007831063 | 0.02345907 |
| ## Xrt_diff_large_neutral_z                      | -0.049511799 | 0.05039813 |
| ## Xrace.ethnicity.5levelBlack                   | -0.042651042 | 0.04974531 |
| ## Xrace.ethnicity.5levelMixed                   | 0.039377712  | 0.04711012 |
| ## Xrace.ethnicity.5levelOther                   | 0.002224191  | 0.03694784 |
| ## Xrace.ethnicity.5levelWhite                   | 0.081403532  | 0.06242940 |
| ## Xdemo_race_hispanic1                          | 0.015280632  | 0.02620300 |
| ## Xinterview_age                                | 0.029468446  | 0.02317054 |
| ## Xhormone_scr_ert_mean:rt_diff_large_neutral_z | 0.087369050  | 0.05030100 |

### Male participants

```
##
## Family: gaussian
## Link function: identity
##
## Formula:
## cbcl_scr_syn_internal_r ~ PDS_score + hormone_scr_ert_mean *
##   rt_diff_large_neutral_z + race.ethnicity.5level + demo_race_hispanic +
##   interview_age
##
## Parametric coefficients:
##
##           Estimate Std. Error t value
## (Intercept)      3.4300417  2.1051416  1.629
## PDS_score         0.9298927  0.2375120  3.915
## hormone_scr_ert_mean 0.0138252  0.0084648  1.633
## rt_diff_large_neutral_z -0.0228206  0.3049842 -0.075
## race.ethnicity.5levelBlack -1.2181199  0.9857758 -1.236
## race.ethnicity.5levelMixed -0.2335701  0.9782657 -0.239
## race.ethnicity.5levelOther -1.3342474  1.0790027 -1.237
## race.ethnicity.5levelWhite -0.4363430  0.9211772 -0.474
## demo_race_hispanic1  0.5510513  0.3683855  1.496
## interview_age      0.0031154  0.0159261  0.196
## hormone_scr_ert_mean:rt_diff_large_neutral_z -0.0006389  0.0087567 -0.073
##
##           Pr(>|t|)
## (Intercept)      0.103
## PDS_score        9.33e-05 ***
## hormone_scr_ert_mean 0.103
## rt_diff_large_neutral_z 0.940
## race.ethnicity.5levelBlack 0.217
## race.ethnicity.5levelMixed 0.811
## race.ethnicity.5levelOther 0.216
## race.ethnicity.5levelWhite 0.636
## demo_race_hispanic1  0.135
## interview_age      0.845
## hormone_scr_ert_mean:rt_diff_large_neutral_z 0.942
## ---
```

```

## Signif. codes:  0 '***' 0.001 '**' 0.01 '*' 0.05 '.' 0.1 ' ' 1
##
##
## R-sq.(adj) =  0.00634
## lmer.REML = 13051  Scale est. = 12.671    n = 2094

##
##              stdcoef      stdse
## X(Intercept)    0.00000000 0.00000000
## XPDS_score      0.089299930 0.02280887
## Xhormone_scr_ert_mean 0.036813723 0.02253999
## Xrt_diff_large_neutral_z -0.003787871 0.05062271
## Xrace.ethnicity.5levelBlack -0.070136835 0.05675894
## Xrace.ethnicity.5levelMixed -0.013544986 0.05673071
## Xrace.ethnicity.5levelOther -0.053704843 0.04343098
## Xrace.ethnicity.5levelWhite -0.036154708 0.07632733
## Xdemo_race_hispanic1 0.039378652 0.02632518
## Xinterview_age 0.004289967 0.02193076
## Xhormone_scr_ert_mean:rt_diff_large_neutral_z -0.003701739 0.05073272

```

#### 4.26 Model: CBCL internalizing factor ~ Testosterone x MID Reaction Time + PDS (large vs. small reward)

##### Female participants

```

##
## Family: gaussian
## Link function: identity
##
## Formula:
## cbcl_scr_syn_internal_r ~ PDS_score + hormone_scr_ert_mean *
##   rt_diff_large_small_z + race.ethnicity.5level + demo_race_hispanic +
##   interview_age
##
## Parametric coefficients:
##               Estimate Std. Error t value
## (Intercept)  -0.063616   2.023539  -0.031
## PDS_score      1.067081   0.186445   5.723
## hormone_scr_ert_mean -0.001765   0.007686  -0.230
## rt_diff_large_small_z -0.013276   0.277035  -0.048
## race.ethnicity.5levelBlack -0.616689   0.777151  -0.794
## race.ethnicity.5levelMixed 0.685774   0.770222   0.890
## race.ethnicity.5levelOther 0.084138   0.891335   0.094
## race.ethnicity.5levelWhite 0.959070   0.707328   1.356
## demo_race_hispanic1 0.185129   0.356411   0.519
## interview_age 0.021724   0.016773   1.295
## hormone_scr_ert_mean:rt_diff_large_small_z 0.008115   0.007345   1.105
##
##               Pr(>|t|)
## (Intercept)      0.975
## PDS_score        1.2e-08 ***
## hormone_scr_ert_mean 0.818
## rt_diff_large_small_z 0.962
## race.ethnicity.5levelBlack 0.428
## race.ethnicity.5levelMixed 0.373

```

```

## race.ethnicity.5levelOther          0.925
## race.ethnicity.5levelWhite          0.175
## demo_race_hispanic1                 0.604
## interview_age                        0.195
## hormone_scr_ert_mean:rt_diff_large_small_z 0.269
## ---
## Signif. codes:  0 '***' 0.001 '**' 0.01 '*' 0.05 '.' 0.1 ' ' 1
##
##
## R-sq.(adj) =  0.0227
## lmer.REML = 12397  Scale est. = 16.842    n = 2010

##                                stdcoef    stdse
## X(Intercept)                   0.000000000 0.00000000
## XPDS_score                      0.140453190 0.02454059
## Xhormone_scr_ert_mean           -0.005380816 0.02342617
## Xrt_diff_large_small_z         -0.002385291 0.04977576
## Xrace.ethnicity.5levelBlack     -0.039477974 0.04975010
## Xrace.ethnicity.5levelMixed     0.041966213 0.04713404
## Xrace.ethnicity.5levelOther     0.003487131 0.03694191
## Xrace.ethnicity.5levelWhite     0.084643049 0.06242543
## Xdemo_race_hispanic1           0.013601884 0.02618636
## Xinterview_age                  0.029985943 0.02315189
## Xhormone_scr_ert_mean:rt_diff_large_small_z 0.055036536 0.04981308

```

## Male participants

```

##
## Family: gaussian
## Link function: identity
##
## Formula:
## cbcl_scr_syn_internal_r ~ PDS_score + hormone_scr_ert_mean *
##   rt_diff_large_small_z + race.ethnicity.5level + demo_race_hispanic +
##   interview_age
##
## Parametric coefficients:
##                                Estimate Std. Error t value
## (Intercept)                   3.401014  2.103254  1.617
## PDS_score                      0.937938  0.237736  3.945
## hormone_scr_ert_mean           0.013567  0.008466  1.603
## rt_diff_large_small_z         0.145048  0.305116  0.475
## race.ethnicity.5levelBlack     -1.201490  0.985328 -1.219
## race.ethnicity.5levelMixed     -0.243791  0.977497 -0.249
## race.ethnicity.5levelOther     -1.327882  1.078007 -1.232
## race.ethnicity.5levelWhite     -0.438065  0.920295 -0.476
## demo_race_hispanic1           0.555928  0.368650  1.508
## interview_age                  0.003316  0.015908  0.208
## hormone_scr_ert_mean:rt_diff_large_small_z -0.007265  0.008915 -0.815
##                                Pr(>|t|)
## (Intercept)                   0.106
## PDS_score                      8.23e-05 ***
## hormone_scr_ert_mean           0.109

```

```

## rt_diff_large_small_z          0.635
## race.ethnicity.5levelBlack      0.223
## race.ethnicity.5levelMixed      0.803
## race.ethnicity.5levelOther      0.218
## race.ethnicity.5levelWhite      0.634
## demo_race_hispanic1            0.132
## interview_age                   0.835
## hormone_scr_ert_mean:rt_diff_large_small_z 0.415
## ---
## Signif. codes:  0 '***' 0.001 '**' 0.01 '*' 0.05 '.' 0.1 ' ' 1
##
##
## R-sq.(adj) =  0.00666
## lmer.REML = 13050  Scale est. = 12.59    n = 2094

##                                stdcoef    stdse
## X(Intercept)                   0.00000000 0.00000000
## XPDS_score                      0.090072527 0.02283043
## Xhormone_scr_ert_mean           0.036127311 0.02254277
## Xrt_diff_large_small_z         0.023911333 0.05029860
## Xrace.ethnicity.5levelBlack     -0.069179314 0.05673318
## Xrace.ethnicity.5levelMixed     -0.014137705 0.05668611
## Xrace.ethnicity.5levelOther     -0.053448628 0.04339089
## Xrace.ethnicity.5levelWhite     -0.036297356 0.07625423
## Xdemo_race_hispanic1           0.039727158 0.02634405
## Xinterview_age                  0.004566693 0.02190639
## Xhormone_scr_ert_mean:rt_diff_large_small_z -0.041011051 0.05032665

```



## 5— Correlation Matrix —

### Female participants

| x1                      | x2                      | N    | corr          | p              |
|-------------------------|-------------------------|------|---------------|----------------|
| bmi                     | interview_age           | 2661 | 0.0697979271  | 0.000314298098 |
| PDS_score               | interview_age           | 2691 | 0.2677278740  | 0.000000000000 |
| PDS_score               | bmi                     | 2661 | 0.2664128834  | 0.000000000000 |
| cbcl_scr_syn_internal_r | interview_age           | 2689 | 0.0280218610  | 0.146307300053 |
| cbcl_scr_syn_internal_r | bmi                     | 2659 | 0.0167186288  | 0.388820050048 |
| cbcl_scr_syn_internal_r | PDS_score               | 2689 | 0.0792744882  | 0.000038652507 |
| hormone_scr_ert_mean_z  | interview_age           | 2478 | 0.2047640705  | 0.000000000000 |
| hormone_scr_ert_mean_z  | bmi                     | 2449 | 0.2012793974  | 0.000000000000 |
| hormone_scr_ert_mean_z  | PDS_score               | 2478 | 0.3093491991  | 0.000000000000 |
| hormone_scr_ert_mean_z  | cbcl_scr_syn_internal_r | 2476 | 0.0043682310  | 0.828012020633 |
| bisbas_ss_basm_rr_z     | interview_age           | 2683 | -0.0350871908 | 0.069194488613 |
| bisbas_ss_basm_rr_z     | bmi                     | 2653 | 0.0877629223  | 0.000005981667 |
| bisbas_ss_basm_rr_z     | PDS_score               | 2683 | 0.0509531725  | 0.008296938217 |
| bisbas_ss_basm_rr_z     | cbcl_scr_syn_internal_r | 2681 | -0.0076173230 | 0.693408003127 |
| bisbas_ss_basm_rr_z     | hormone_scr_ert_mean_z  | 2470 | 0.0122127956  | 0.544063120481 |
| rt_diff_large_neutral_z | interview_age           | 2258 | 0.0433000471  | 0.039650139681 |
| rt_diff_large_neutral_z | bmi                     | 2236 | 0.0064987983  | 0.758739908243 |
| rt_diff_large_neutral_z | PDS_score               | 2258 | 0.0270868742  | 0.198216746294 |
| rt_diff_large_neutral_z | cbcl_scr_syn_internal_r | 2256 | 0.0170572357  | 0.418064501460 |
| rt_diff_large_neutral_z | hormone_scr_ert_mean_z  | 2085 | -0.0146554784 | 0.503603840224 |
| rt_diff_large_neutral_z | bisbas_ss_basm_rr_z     | 2252 | -0.0089581753 | 0.670920599276 |
| rt_diff_large_small_z   | interview_age           | 2265 | 0.0387203151  | 0.065409130890 |
| rt_diff_large_small_z   | bmi                     | 2243 | 0.0191346959  | 0.365040078316 |
| rt_diff_large_small_z   | PDS_score               | 2265 | 0.0081123862  | 0.699586997350 |
| rt_diff_large_small_z   | cbcl_scr_syn_internal_r | 2263 | 0.0246669300  | 0.240811584762 |
| rt_diff_large_small_z   | hormone_scr_ert_mean_z  | 2093 | -0.0043207507 | 0.843393848595 |
| rt_diff_large_small_z   | bisbas_ss_basm_rr_z     | 2259 | -0.0097351385 | 0.643754590861 |
| rt_diff_large_small_z   | rt_diff_large_neutral_z | 2239 | 0.4153704338  | 0.000000000000 |
| accumbens_rvsn_ant_z    | interview_age           | 2256 | -0.0176046681 | 0.403280509753 |
| accumbens_rvsn_ant_z    | bmi                     | 2233 | -0.0344483546 | 0.103648829348 |
| accumbens_rvsn_ant_z    | PDS_score               | 2256 | -0.0297940098 | 0.157166213595 |
| accumbens_rvsn_ant_z    | cbcl_scr_syn_internal_r | 2255 | -0.0297104272 | 0.158426512633 |
| accumbens_rvsn_ant_z    | hormone_scr_ert_mean_z  | 2082 | -0.0078304345 | 0.721027940906 |
| accumbens_rvsn_ant_z    | bisbas_ss_basm_rr_z     | 2249 | 0.0250223855  | 0.235551943639 |
| accumbens_rvsn_ant_z    | rt_diff_large_neutral_z | 2118 | 0.0016282449  | 0.940301861162 |
| accumbens_rvsn_ant_z    | rt_diff_large_small_z   | 2125 | 0.0280878101  | 0.195569562859 |
| caudate_rvsn_ant_z      | interview_age           | 2265 | 0.0303692292  | 0.148494896103 |
| caudate_rvsn_ant_z      | bmi                     | 2242 | -0.0298576697 | 0.157573349804 |
| caudate_rvsn_ant_z      | PDS_score               | 2265 | -0.0107774820 | 0.608193482802 |
| caudate_rvsn_ant_z      | cbcl_scr_syn_internal_r | 2263 | 0.0135449263  | 0.519562969018 |
| caudate_rvsn_ant_z      | hormone_scr_ert_mean_z  | 2091 | -0.0199724271 | 0.361330294647 |
| caudate_rvsn_ant_z      | bisbas_ss_basm_rr_z     | 2258 | 0.0065029299  | 0.757442405558 |
| caudate_rvsn_ant_z      | rt_diff_large_neutral_z | 2126 | -0.0063639367 | 0.769321588379 |
| caudate_rvsn_ant_z      | rt_diff_large_small_z   | 2133 | 0.0045931614  | 0.832099833472 |
| caudate_rvsn_ant_z      | accumbens_rvsn_ant_z    | 2244 | 0.5145685384  | 0.000000000000 |
| putamen_rvsn_ant_z      | interview_age           | 2266 | 0.0392854181  | 0.061515089681 |
| putamen_rvsn_ant_z      | bmi                     | 2243 | -0.0339508622 | 0.107946742297 |
| putamen_rvsn_ant_z      | PDS_score               | 2266 | 0.0030381797  | 0.885069694363 |
| putamen_rvsn_ant_z      | cbcl_scr_syn_internal_r | 2264 | 0.0053204885  | 0.800253643605 |
| putamen_rvsn_ant_z      | hormone_scr_ert_mean_z  | 2090 | 0.0045604841  | 0.834943351642 |
| putamen_rvsn_ant_z      | bisbas_ss_basm_rr_z     | 2259 | -0.0058706069 | 0.780343301389 |
| putamen_rvsn_ant_z      | rt_diff_large_neutral_z | 2127 | -0.0153184883 | 0.480122360551 |
| putamen_rvsn_ant_z      | rt_diff_large_small_z   | 2136 | 0.0125189606  | 0.563080983729 |



## Male participants

| x1                      | x2                      | N    | corr          | p                      |
|-------------------------|-------------------------|------|---------------|------------------------|
| bmi                     | interview_age           | 2881 | 0.0966528288  | 0.0000002017077351812  |
| PDS_score               | interview_age           | 2908 | 0.1396694054  | 0.00000000000000386357 |
| PDS_score               | bmi                     | 2881 | 0.1960067350  | 0.00000000000000000000 |
| cbcl_scr_syn_internal_r | interview_age           | 2908 | 0.0098049600  | 0.5971340091803529759  |
| cbcl_scr_syn_internal_r | bmi                     | 2881 | 0.0588245618  | 0.0015843619494833038  |
| cbcl_scr_syn_internal_r | PDS_score               | 2908 | 0.0637146967  | 0.0005862725179697214  |
| hormone_scr_ert_mean_z  | interview_age           | 2701 | 0.1487784611  | 0.0000000000000077715  |
| hormone_scr_ert_mean_z  | bmi                     | 2674 | 0.1433937770  | 0.00000000000000932587 |
| hormone_scr_ert_mean_z  | PDS_score               | 2701 | 0.1619303875  | 0.00000000000000000000 |
| hormone_scr_ert_mean_z  | cbcl_scr_syn_internal_r | 2701 | 0.0281296607  | 0.1438664337380368696  |
| bisbas_ss_basm_rr_z     | interview_age           | 2893 | -0.0079455258 | 0.6692445906073074546  |
| bisbas_ss_basm_rr_z     | bmi                     | 2867 | 0.0124564412  | 0.5049590805262285098  |
| bisbas_ss_basm_rr_z     | PDS_score               | 2893 | 0.0433002340  | 0.0198559476401842793  |
| bisbas_ss_basm_rr_z     | cbcl_scr_syn_internal_r | 2893 | -0.0183855853 | 0.3228811129364856924  |
| bisbas_ss_basm_rr_z     | hormone_scr_ert_mean_z  | 2687 | -0.0209221753 | 0.2783019400062161086  |
| rt_diff_large_neutral_z | interview_age           | 2323 | 0.0373689790  | 0.0717420899860385929  |
| rt_diff_large_neutral_z | bmi                     | 2303 | 0.0024735094  | 0.9055618272087564424  |
| rt_diff_large_neutral_z | PDS_score               | 2323 | -0.0249753383 | 0.2288645369384461059  |
| rt_diff_large_neutral_z | cbcl_scr_syn_internal_r | 2323 | -0.0159515540 | 0.4422137844954039387  |
| rt_diff_large_neutral_z | hormone_scr_ert_mean_z  | 2166 | -0.0066765724 | 0.7561398479829075647  |
| rt_diff_large_neutral_z | bisbas_ss_basm_rr_z     | 2314 | 0.0181607093  | 0.3825520481546205164  |
| rt_diff_large_small_z   | interview_age           | 2324 | -0.0060778257 | 0.7696412534858945164  |
| rt_diff_large_small_z   | bmi                     | 2304 | 0.0087860458  | 0.6733830943449086170  |
| rt_diff_large_small_z   | PDS_score               | 2324 | -0.0059343852 | 0.7749296259289932820  |
| rt_diff_large_small_z   | cbcl_scr_syn_internal_r | 2324 | -0.0228606158 | 0.2706299789261157329  |
| rt_diff_large_small_z   | hormone_scr_ert_mean_z  | 2166 | -0.0186242256 | 0.3862971977215365892  |
| rt_diff_large_small_z   | bisbas_ss_basm_rr_z     | 2315 | 0.0173233510  | 0.4047794270526257065  |
| rt_diff_large_small_z   | rt_diff_large_neutral_z | 2304 | 0.4305686936  | 0.00000000000000000000 |
| accumbens_rvsn_ant_z    | interview_age           | 2306 | -0.0078626409 | 0.7058974327674916171  |
| accumbens_rvsn_ant_z    | bmi                     | 2287 | -0.0130347558 | 0.5332572877746026840  |
| accumbens_rvsn_ant_z    | PDS_score               | 2306 | 0.0114506167  | 0.5826020043465063302  |
| accumbens_rvsn_ant_z    | cbcl_scr_syn_internal_r | 2306 | 0.0005122498  | 0.9803857240469753264  |
| accumbens_rvsn_ant_z    | hormone_scr_ert_mean_z  | 2146 | 0.0091296993  | 0.6725176876361220745  |
| accumbens_rvsn_ant_z    | bisbas_ss_basm_rr_z     | 2296 | -0.0291293699 | 0.1629205146729537645  |
| accumbens_rvsn_ant_z    | rt_diff_large_neutral_z | 2136 | 0.0003463538  | 0.9872359696310082366  |
| accumbens_rvsn_ant_z    | rt_diff_large_small_z   | 2139 | -0.0072396845 | 0.7378972862804988874  |
| caudate_rvsn_ant_z      | interview_age           | 2317 | 0.0286907841  | 0.1674092652793606195  |
| caudate_rvsn_ant_z      | bmi                     | 2297 | -0.0334198270 | 0.1093130562505095770  |
| caudate_rvsn_ant_z      | PDS_score               | 2317 | 0.0079714580  | 0.7013439043759586155  |
| caudate_rvsn_ant_z      | cbcl_scr_syn_internal_r | 2317 | 0.0119896629  | 0.5640513032392289183  |
| caudate_rvsn_ant_z      | hormone_scr_ert_mean_z  | 2158 | -0.0046470795 | 0.8291804313783937008  |
| caudate_rvsn_ant_z      | bisbas_ss_basm_rr_z     | 2307 | -0.0247957766 | 0.2338462150256703786  |
| caudate_rvsn_ant_z      | rt_diff_large_neutral_z | 2148 | 0.0040716162  | 0.8504093235823517726  |
| caudate_rvsn_ant_z      | rt_diff_large_small_z   | 2149 | -0.0327280850 | 0.1293400518926017817  |
| caudate_rvsn_ant_z      | accumbens_rvsn_ant_z    | 2283 | 0.5813610694  | 0.00000000000000000000 |
| putamen_rvsn_ant_z      | interview_age           | 2310 | 0.0248198000  | 0.2330892972307805344  |
| putamen_rvsn_ant_z      | bmi                     | 2290 | -0.0281733407 | 0.1777430238693766817  |
| putamen_rvsn_ant_z      | PDS_score               | 2310 | -0.0070234550 | 0.7358259587091489084  |
| putamen_rvsn_ant_z      | cbcl_scr_syn_internal_r | 2310 | 0.0047408986  | 0.8198505545923455706  |
| putamen_rvsn_ant_z      | hormone_scr_ert_mean_z  | 2154 | -0.0233010527 | 0.2797198179940560969  |
| putamen_rvsn_ant_z      | bisbas_ss_basm_rr_z     | 2300 | -0.0530016017 | 0.0110134216899611114  |
| putamen_rvsn_ant_z      | rt_diff_large_neutral_z | 2142 | 0.0202584658  | 0.3486834436386410107  |
| putamen_rvsn_ant_z      | rt_diff_large_small_z   | 2144 | -0.0215003876 | 0.3197000986782685405  |
| putamen_rvsn_ant_z      | accumbens_rvsn_ant_z    | 2276 | 0.5330442739  | 0.00000000000000000000 |
| putamen_rvsn_ant_z      | caudate_rvsn_ant_z      | 2293 | 0.7863880858  | 0.00000000000000000000 |
| putamen_rvsn_ant_z      | interview_age           | 2304 | 0.0222452227  | 0.00222222222222222222 |

## 6— Compare Outliers to Non-Outliers on Demographic Variables

### Female participants

```
##          interview_age          bmi race.ethnicity.5level
##          9.995608e-01      1.914984e-01      8.640229e-06
##          household.income      high.educ      demo_race_hispanic
##          NaN      1.033884e-01      7.700048e-01
```

```
## -----Summary descriptives table by 'is_outlier_any'-----
##
```

```
## -----
##          not outlier      outlier      p.overall
##          N=2511      N=180
## -----
## interview_age          119 (7.45)      119 (7.50)      1.000
## bmi          18.6 (3.90)      19.1 (3.96)      0.115
## race.ethnicity.5level:          <0.001
##   Asian          72 (2.91%)      2 (1.12%)
##   Black          380 (15.4%)      55 (30.7%)
##   Mixed          292 (11.8%)      28 (15.6%)
##   Other          125 (5.06%)      8 (4.47%)
##   White          1603 (64.8%)      86 (48.0%)
## household.income:
##   [<5K]          63 (2.73%)      6 (3.59%)
##   [>=200K]      264 (11.4%)      14 (8.38%)
##   [100K-200K]   756 (32.7%)      37 (22.2%)
##   [12K-16K]     55 (2.38%)      4 (2.40%)
##   [16K-25K]     99 (4.29%)      9 (5.39%)
##   [25K-35K]    142 (6.15%)      12 (7.19%)
##   [35K-50K]    196 (8.48%)      21 (12.6%)
##   [50K-75K]    309 (13.4%)      26 (15.6%)
##   [5K-12K]     85 (3.68%)      14 (8.38%)
##   [75K-100K]   341 (14.8%)      24 (14.4%)
## high.educ:          0.041
##   < HS Diploma  118 (4.70%)      12 (6.67%)
##   Bachelor      648 (25.8%)      34 (18.9%)
##   HS Diploma/GED 219 (8.73%)      21 (11.7%)
##   Post Graduate Degree 907 (36.1%)      57 (31.7%)
##   Some College  617 (24.6%)      56 (31.1%)
## demo_race_hispanic:          0.616
##   0          1996 (80.4%)      139 (78.5%)
##   1          487 (19.6%)      38 (21.5%)
## -----
```

### Male participants

```
##          interview_age          bmi race.ethnicity.5level
##          2.168334e-01      1.209421e-02      2.105984e-05
##          household.income      high.educ      demo_race_hispanic
```

## NaN 8.937779e-02 2.196325e-01

## -----Summary descriptives table by 'is\_outlier\_any'-----

|                           | not outlier<br>N=2657 | outlier<br>N=251 | p.overall |
|---------------------------|-----------------------|------------------|-----------|
| ## interview_age          | 119 (7.55)            | 119 (7.27)       | 0.173     |
| ## bmi                    | 18.5 (3.83)           | 19.2 (3.85)      | 0.005     |
| ## race.ethnicity.5level: |                       |                  | <0.001    |
| ## Asian                  | 57 (2.17%)            | 4 (1.65%)        |           |
| ## Black                  | 320 (12.2%)           | 57 (23.5%)       |           |
| ## Mixed                  | 311 (11.8%)           | 36 (14.8%)       |           |
| ## Other                  | 144 (5.49%)           | 7 (2.88%)        |           |
| ## White                  | 1793 (68.3%)          | 139 (57.2%)      |           |
| ## household.income:      |                       |                  | .         |
| ## [<5K]                  | 67 (2.76%)            | 17 (7.52%)       |           |
| ## [>=200K]               | 299 (12.3%)           | 15 (6.64%)       |           |
| ## [100K-200K]            | 768 (31.6%)           | 68 (30.1%)       |           |
| ## [12K-16K]              | 49 (2.02%)            | 9 (3.98%)        |           |
| ## [16K-25K]              | 111 (4.57%)           | 16 (7.08%)       |           |
| ## [25K-35K]              | 131 (5.40%)           | 9 (3.98%)        |           |
| ## [35K-50K]              | 207 (8.53%)           | 22 (9.73%)       |           |
| ## [50K-75K]              | 345 (14.2%)           | 29 (12.8%)       |           |
| ## [5K-12K]               | 85 (3.50%)            | 10 (4.42%)       |           |
| ## [75K-100K]             | 366 (15.1%)           | 31 (13.7%)       |           |
| ## high.educ:             |                       |                  | 0.054     |
| ## < HS Diploma           | 106 (3.99%)           | 13 (5.22%)       |           |
| ## Bachelor               | 684 (25.8%)           | 58 (23.3%)       |           |
| ## HS Diploma/GED         | 216 (8.14%)           | 28 (11.2%)       |           |
| ## Post Graduate Degree   | 973 (36.7%)           | 74 (29.7%)       |           |
| ## Some College           | 675 (25.4%)           | 76 (30.5%)       |           |
| ## demo_race_hispanic:    |                       |                  | 0.220     |
| ## 0                      | 2086 (79.6%)          | 187 (76.0%)      |           |
| ## 1                      | 536 (20.4%)           | 59 (24.0%)       |           |
