# Supplementary material for: Reward sensitivity and internalizing symptoms during the transition to puberty: An examination of 9-and 10-year-olds in the ABCD Study
Source: PubMed Central journal article supplement (PMC9649995; doi:10.1016/j.dcn.2022.101172), 2022-10-31
Supplement: mmc4.pdf [file mmc4.pdf]

# Supplement D

Reward sensitivity and internalizing symptoms during the transition to puberty: An examination of 9- and 10-year-olds in the ABCD Study.

## Contents

|                                                                    |          |
|--------------------------------------------------------------------|----------|
| <b>Sensitivity Analysis Results for Sample 2</b>                   | <b>8</b> |
| <b>1—Internalizing-Puberty—</b>                                    | <b>8</b> |
| 1.1 Model: CBCL internalizing factor ~ PDS . . . . .               | 8        |
| Female participants . . . . .                                      | 8        |
| Male participants . . . . .                                        | 9        |
| 1.2 Model: CBCL Anxious-Depressed ~ PDS . . . . .                  | 10       |
| Female participants . . . . .                                      | 10       |
| Male participants . . . . .                                        | 11       |
| 1.3 Model: CBCL Withdrawn-Depressed ~ PDS . . . . .                | 13       |
| Female participants . . . . .                                      | 13       |
| Male participants . . . . .                                        | 14       |
| 1.4 Model: CBCL Depressed DSM-5 ~ PDS . . . . .                    | 15       |
| Female participants . . . . .                                      | 15       |
| Male participants . . . . .                                        | 16       |
| 1.5 Model: CBCL internalizing factor ~ Pubertal category . . . . . | 18       |
| Female participants . . . . .                                      | 18       |
| Male participants . . . . .                                        | 19       |
| 1.6 Model: CBCL Anxious-Depressed ~ Pubertal category . . . . .    | 20       |
| Female participants . . . . .                                      | 20       |
| Male participants . . . . .                                        | 21       |
| 1.7 Model: CBCL Withdrawn-Depressed ~ Pubertal category . . . . .  | 23       |
| Female participants . . . . .                                      | 23       |
| Male participants . . . . .                                        | 24       |
| 1.8 Model: CBCL Depressed DSM-5 ~ Pubertal category . . . . .      | 25       |
| Female participants . . . . .                                      | 25       |
| Male participants . . . . .                                        | 27       |

|                                                                                    |    |
|------------------------------------------------------------------------------------|----|
| 1.9 Model: CBCL internalizing factor ~ Testosterone . . . . .                      | 28 |
| Female participants . . . . .                                                      | 28 |
| Male participants . . . . .                                                        | 29 |
| 1.10 Model: CBCL Anxious-Depressed ~ Testosterone . . . . .                        | 31 |
| Female participants . . . . .                                                      | 31 |
| Male participants . . . . .                                                        | 32 |
| 1.11 Model: CBCL Withdrawn-Depressed ~ Testosterone . . . . .                      | 33 |
| Female participants . . . . .                                                      | 33 |
| Male participants . . . . .                                                        | 35 |
| 1.12 Model: CBCL Depressed DSM-5 ~ Testosterone . . . . .                          | 36 |
| Female participants . . . . .                                                      | 36 |
| Male participants . . . . .                                                        | 37 |
| 1.13 Model: CBCL internalizing factor ~ Testosterone + PDS . . . . .               | 38 |
| Female participants . . . . .                                                      | 38 |
| Male participants . . . . .                                                        | 40 |
| 1.14 Model: CBCL internalizing factor ~ Testosterone + Pubertal category . . . . . | 41 |
| Female participants . . . . .                                                      | 41 |
| Male participants . . . . .                                                        | 42 |
| 1.15 Model: CBCL Anxious-Depressed ~ Testosterone + PDS . . . . .                  | 44 |
| Female participants . . . . .                                                      | 44 |
| Male participants . . . . .                                                        | 45 |
| 1.16 Model: CBCL Anxious-Depressed ~ Testosterone + Pubertal category . . . . .    | 47 |
| Female participants . . . . .                                                      | 47 |
| Male participants . . . . .                                                        | 48 |
| 1.17 Model: CBCL Withdrawn-Depressed ~ Testosterone + PDS . . . . .                | 49 |
| Female participants . . . . .                                                      | 49 |
| Male participants . . . . .                                                        | 51 |
| 1.18 Model: CBCL Withdrawn-Depressed ~ Testosterone + Pubertal category . . . . .  | 52 |
| Female participants . . . . .                                                      | 52 |
| Male participants . . . . .                                                        | 53 |
| 1.19 Model: CBCL Depressed DSM-5 ~ Testosterone + PDS . . . . .                    | 55 |
| Female participants . . . . .                                                      | 55 |
| Male participants . . . . .                                                        | 56 |
| 1.20 Model: CBCL Depressed DSM-5 ~ Testosterone + Pubertal category . . . . .      | 58 |
| Female participants . . . . .                                                      | 58 |
| Male participants . . . . .                                                        | 59 |

|                                                             |           |
|-------------------------------------------------------------|-----------|
| <b>2—Reward~Puberty—</b>                                    | <b>61</b> |
| 2.1 Model: BIS-BAS-RR ~ PDS . . . . .                       | 61        |
| Female participants . . . . .                               | 61        |
| Male participants . . . . .                                 | 61        |
| 2.2 Model : Reaction Time ~ PDS . . . . .                   | 62        |
| Female participants . . . . .                               | 62        |
| Male participants . . . . .                                 | 63        |
| 2.3 Model: Caudate Anticipation ~ PDS . . . . .             | 64        |
| Female participants . . . . .                               | 64        |
| Male participants . . . . .                                 | 64        |
| 2.4 Model B: Putamen Anticipation ~ PDS . . . . .           | 65        |
| Female participants . . . . .                               | 65        |
| Male participants . . . . .                                 | 65        |
| 2.5 Model: Accumbens Anticipation ~ PDS . . . . .           | 66        |
| Female participants . . . . .                               | 66        |
| Male participants . . . . .                                 | 66        |
| 2.6 Model: Caudate Feedback ~ PDS . . . . .                 | 67        |
| Female participants . . . . .                               | 67        |
| Male participants . . . . .                                 | 67        |
| 2.7 Model: Putamen Feedback ~ PDS . . . . .                 | 68        |
| Female participants . . . . .                               | 68        |
| Male participants . . . . .                                 | 68        |
| 2.8 Model: Accumbens Feedback ~ PDS . . . . .               | 69        |
| Female participants . . . . .                               | 69        |
| Male participants . . . . .                                 | 69        |
| 2.9 Model: OFC Anticipation ~ PDS . . . . .                 | 70        |
| Female participants . . . . .                               | 70        |
| Male participants . . . . .                                 | 71        |
| 2.10 Model: OFC Feedback ~ PDS . . . . .                    | 72        |
| Female participants . . . . .                               | 72        |
| Male participants . . . . .                                 | 73        |
| 2.11 Model: Caudate Anticipation ~ Testosterone . . . . .   | 74        |
| Female participants . . . . .                               | 74        |
| Male participants . . . . .                                 | 75        |
| 2.12 Model B: Putamen Anticipation ~ Testosterone . . . . . | 75        |
| Female participants . . . . .                               | 75        |

|                                                                                                  |           |
|--------------------------------------------------------------------------------------------------|-----------|
| Male participants . . . . .                                                                      | 76        |
| 2.13 Model: Accumbens Anticipation ~ Testosterone . . . . .                                      | 77        |
| Female participants . . . . .                                                                    | 77        |
| Male participants . . . . .                                                                      | 77        |
| 2.14 Model: Caudate Feedback ~ Testosterone . . . . .                                            | 78        |
| Female participants . . . . .                                                                    | 78        |
| Male participants . . . . .                                                                      | 79        |
| 2.15 Model: Putamen Feedback ~ Testosterone . . . . .                                            | 80        |
| Female participants . . . . .                                                                    | 80        |
| Male participants . . . . .                                                                      | 80        |
| 2.16 Model: Accumbens Feedback ~ Testosterone . . . . .                                          | 81        |
| Female participants . . . . .                                                                    | 81        |
| Male participants . . . . .                                                                      | 82        |
| 2.17 Model: OFC Anticipation ~ Testosterone . . . . .                                            | 82        |
| Female participants . . . . .                                                                    | 82        |
| Male participants . . . . .                                                                      | 84        |
| 2.18 Model: OFC Feedback ~ Testosterone . . . . .                                                | 85        |
| Female participants . . . . .                                                                    | 85        |
| Male participants . . . . .                                                                      | 86        |
| 2.19 Model: MID Reaction Time ~ Testosterone . . . . .                                           | 88        |
| Female participants . . . . .                                                                    | 88        |
| Male participants . . . . .                                                                      | 89        |
| 2.20 Model: BIS-BAS-RR ~ Testosterone . . . . .                                                  | 90        |
| Female participants . . . . .                                                                    | 90        |
| Male participants . . . . .                                                                      | 90        |
| <b>3—Internalizing~Reward—</b>                                                                   | <b>92</b> |
| 3.1 Model: CBCL internalizing factor ~ Nucleus Accumbens activity (anticipation stage) . . . . . | 92        |
| Female participants . . . . .                                                                    | 92        |
| Male participants . . . . .                                                                      | 92        |
| 3.2 Model: CBCL internalizing factor ~ Caudate activity (anticipation stage) . . . . .           | 93        |
| Female participants . . . . .                                                                    | 93        |
| Male participants . . . . .                                                                      | 93        |
| 3.3 Model: CBCL internalizing factor ~ Putamen activity (anticipation stage) . . . . .           | 94        |
| Female participants . . . . .                                                                    | 94        |
| Male participants . . . . .                                                                      | 94        |
| 3.4 Model: CBCL internalizing factor ~ Accumbens activity (feedback stage) . . . . .             | 95        |

|                                                                                                  |            |
|--------------------------------------------------------------------------------------------------|------------|
| Female participants . . . . .                                                                    | 95         |
| Male participants . . . . .                                                                      | 95         |
| 3.5 Model: CBCL internalizing factor ~ Caudate activity (feedback stage) . . . . .               | 96         |
| Female participants . . . . .                                                                    | 96         |
| Male participants . . . . .                                                                      | 96         |
| 3.6 Model: CBCL internalizing factor ~ Putamen activity (feedback stage) . . . . .               | 97         |
| Female participants . . . . .                                                                    | 97         |
| Male participants . . . . .                                                                      | 97         |
| 3.7 Model: CBCL internalizing factor ~ OFC activity (anticipation stage) . . . . .               | 98         |
| Female participants . . . . .                                                                    | 98         |
| Male participants . . . . .                                                                      | 99         |
| 3.8 Model: CBCL internalizing factor ~ OFC activity (feedback stage) . . . . .                   | 100        |
| Female participants . . . . .                                                                    | 100        |
| Male participants . . . . .                                                                      | 101        |
| 3.9 Model: CBCL internalizing factor ~ BIS-BAS-RR . . . . .                                      | 101        |
| Female participants . . . . .                                                                    | 101        |
| Male participants . . . . .                                                                      | 102        |
| 3.10 Model: CBCL internalizing factor ~ MID Reaction Time . . . . .                              | 102        |
| Female participants . . . . .                                                                    | 102        |
| Male participants . . . . .                                                                      | 103        |
| <b>4—Internalizing~Puberty x Reward—</b>                                                         | <b>105</b> |
| 4.1 Model: CBCL internalizing factor ~ PDS x Accumbens activity (anticipation stage) . . . . .   | 105        |
| Female participants . . . . .                                                                    | 105        |
| Male participants . . . . .                                                                      | 106        |
| 4.2 Model: CBCL internalizing factor ~ PDS x Caudate activity (anticipation stage) . . . . .     | 107        |
| Female participants . . . . .                                                                    | 107        |
| Male participants . . . . .                                                                      | 109        |
| 4.3 Model: CBCL internalizing factor ~ PDS x Putamen activity (anticipation stage) . . . . .     | 110        |
| Female participants . . . . .                                                                    | 110        |
| Male participants . . . . .                                                                      | 111        |
| 4.4 Model: CBCL internalizing factor ~ PDS x Lateral OFC activity (anticipation stage) . . . . . | 113        |
| Female participants . . . . .                                                                    | 113        |
| Male participants . . . . .                                                                      | 114        |
| 4.5 Model: CBCL internalizing factor ~ PDS x Medial OFC activity (anticipation stage) . . . . .  | 115        |
| Female participants . . . . .                                                                    | 115        |
| Male participants . . . . .                                                                      | 117        |

|                                                                                                      |     |
|------------------------------------------------------------------------------------------------------|-----|
| 4.6 Model: CBCL internalizing factor ~ PDS x Accumbens activity (feedback)                           | 118 |
| Female participants                                                                                  | 118 |
| Male participants                                                                                    | 120 |
| 4.7 Model: CBCL internalizing factor ~ PDS x Caudate activity (feedback)                             | 122 |
| Female participants                                                                                  | 122 |
| Male participants                                                                                    | 123 |
| 4.8 Model: CBCL internalizing factor ~ PDS x Putamen activity (feedback)                             | 124 |
| Female participants                                                                                  | 124 |
| Male participants                                                                                    | 126 |
| 4.9 Model: CBCL internalizing factor ~ PDS x Lateral OFC activity (feedback stage)                   | 127 |
| Female participants                                                                                  | 127 |
| Male participants                                                                                    | 128 |
| 4.10 Model: CBCL internalizing factor ~ PDS x Medial OFC activity (feedback stage)                   | 130 |
| Female participants                                                                                  | 130 |
| Male participants                                                                                    | 131 |
| 4.11 Model: CBCL internalizing factor ~ PDS x BIS-BAS                                                | 132 |
| Female participants                                                                                  | 132 |
| Male participants                                                                                    | 134 |
| 4.12 Model: CBCL internalizing factor ~ PDS x MID reaction time (large reward vs. neutral)           | 135 |
| Female participants                                                                                  | 135 |
| Male participants                                                                                    | 136 |
| 4.13 Model: CBCL internalizing factor ~ PDS x MID reaction time (large vs. small reward)             | 138 |
| Female participants                                                                                  | 138 |
| Male participants                                                                                    | 139 |
| 4.14 Model: CBCL internalizing factor ~ Testosterone x Accumbens activity (anticipation stage) + PDS | 140 |
| Female participants                                                                                  | 140 |
| Male participants                                                                                    | 142 |
| 4.15 Model: CBCL internalizing factor ~ Testosterone x Caudate activity (anticipation stage) + PDS   | 145 |
| Female participants                                                                                  | 145 |
| Male participants                                                                                    | 147 |
| 4.16 Model: CBCL internalizing factor ~ Testosterone x Putamen activity (anticipation stage) + PDS   | 149 |
| Female participants                                                                                  | 149 |
| Male participants                                                                                    | 151 |
| 4.17 Model: CBCL internalizing factor ~ Testosterone x Accumbens activity (feedback stage) + PDS     | 153 |
| Female participants                                                                                  | 153 |

|                                                                                                           |                               |     |
|-----------------------------------------------------------------------------------------------------------|-------------------------------|-----|
|                                                                                                           | Male participants . . . . .   | 155 |
| 4.18 Model: CBCL internalizing factor ~ Testosterone x Caudate activity (Feedback stage) + PDS            |                               | 157 |
|                                                                                                           | Female participants . . . . . | 157 |
|                                                                                                           | Male participants . . . . .   | 159 |
| 4.19 Model: CBCL internalizing factor ~ Testosterone x Putamen activity (Feedback stage) + PDS            |                               | 161 |
|                                                                                                           | Female participants . . . . . | 161 |
|                                                                                                           | Male participants . . . . .   | 163 |
| 4.20 Model: CBCL internalizing factor ~ Testosterone x Lateral OFC activity (anticipation stage) + PDS    |                               | 165 |
|                                                                                                           | Female participants . . . . . | 165 |
|                                                                                                           | Male participants . . . . .   | 167 |
| 4.21 Model: CBCL internalizing factor ~ Testosterone x Medial OFC activity (anticipation stage) + PDS     |                               | 168 |
|                                                                                                           | Female participants . . . . . | 168 |
|                                                                                                           | Male participants . . . . .   | 170 |
| 4.22 Model: CBCL internalizing factor ~ Testosterone x Lateral OFC activity (feedback stage) + PDS        |                               | 171 |
|                                                                                                           | Female participants . . . . . | 171 |
|                                                                                                           | Male participants . . . . .   | 173 |
| 4.23 Model: CBCL internalizing factor ~ Testosterone x Medial OFC activity (feedback stage) + PDS         |                               | 175 |
|                                                                                                           | Female participants . . . . . | 175 |
|                                                                                                           | Male participants . . . . .   | 177 |
| 4.24 Model: CBCL internalizing factor ~ Testosterone x BIS-BAS RR + PDS                                   |                               | 179 |
|                                                                                                           | Female participants . . . . . | 179 |
|                                                                                                           | Male participants . . . . .   | 181 |
| 4.25 Model: CBCL internalizing factor ~ Testosterone x MID Reaction Time + PDS (large reward vs. neutral) |                               | 183 |
|                                                                                                           | Female participants . . . . . | 183 |
|                                                                                                           | Male participants . . . . .   | 185 |
| 4.26 Model: CBCL internalizing factor ~ Testosterone x MID Reaction Time + PDS (large vs. small reward)   |                               | 187 |
|                                                                                                           | Female participants . . . . . | 187 |
|                                                                                                           | Male participants . . . . .   | 189 |

# Sensitivity Analysis Results for Sample 2

## 1—Internalizing~Puberty—

### 1.1 Model: CBCL internalizing factor ~ PDS

Female participants

```
##
## Family: gaussian
## Link function: identity
##
## Formula:
## cbcl_scr_syn_internal_r ~ PDS_score + race.ethnicity.5level +
##   interview_age + bmi + household.income + high.educ + demo_race_hispanic
##
## Parametric coefficients:
##               Estimate Std. Error t value Pr(>|t|)
## (Intercept)      0.24585    2.14625   0.115 0.908813
## PDS_score         0.63910    0.16994   3.761 0.000173 ***
## race.ethnicity.5levelBlack -0.59950    0.80357  -0.746 0.455719
## race.ethnicity.5levelMixed  1.16125    0.78203   1.485 0.137698
## race.ethnicity.5levelOther -0.07551    0.91532  -0.082 0.934261
## race.ethnicity.5levelWhite  1.16079    0.72966   1.591 0.111774
## interview_age     0.02398    0.01551   1.546 0.122175
## bmi               0.02183    0.03081   0.708 0.478737
## household.income[>=200K]  -2.48695    0.84306  -2.950 0.003210 **
## household.income[100K-200K] -1.53646    0.78498  -1.957 0.050425 .
## household.income[12K-16K]   -0.16447    1.00678  -0.163 0.870247
## household.income[16K-25K]  -1.19402    0.86844  -1.375 0.169291
## household.income[25K-35K]    0.06806    0.82129   0.083 0.933964
## household.income[35K-50K]  -1.23125    0.79766  -1.544 0.122825
## household.income[50K-75K]  -1.17459    0.78183  -1.502 0.133139
## household.income[5K-12K]     0.01842    0.88108   0.021 0.983323
## household.income[75K-100K] -1.20384    0.79552  -1.513 0.130345
## high.educBachelor    0.71480    0.72727   0.983 0.325782
## high.educHS Diploma/GED   0.57208    0.72972   0.784 0.433137
## high.educPost Graduate Degree 1.07092    0.74080   1.446 0.148410
## high.educSome College    0.98398    0.67857   1.450 0.147167
## demo_race_hispanic1     0.01775    0.35033   0.051 0.959598
## ---
## Signif. codes:  0 '***' 0.001 '**' 0.01 '*' 0.05 '.' 0.1 ' ' 1
##
##
## R-sq.(adj) =  0.0208
## lmer.REML = 14752  Scale est. = 17.681    n = 2393
##
##               stdcoef      stdse
## X(Intercept)      0.000000000 0.00000000
## XPDS_score        0.0858969556 0.02283994
## Xrace.ethnicity.5levelBlack -0.0398953423 0.05347634
## Xrace.ethnicity.5levelMixed  0.0704570266 0.04744831
## Xrace.ethnicity.5levelOther -0.0029141215 0.03532548
```



```

## Xrace.ethnicity.5levelWhite      0.1021486553 0.06420956
## Xinterview_age                    0.0330686575 0.02138618
## Xbmi                              0.0154539404 0.02181381
## Xhousehold.income[>=200K]       -0.1461091791 0.04952977
## Xhousehold.income[100K-200K]    -0.1329916338 0.06794514
## Xhousehold.income[12K-16K]      -0.0045211969 0.02767591
## Xhousehold.income[16K-25K]      -0.0442252598 0.03216609
## Xhousehold.income[25K-35K]       0.0030151619 0.03638550
## Xhousehold.income[35K-50K]      -0.0646205500 0.04186418
## Xhousehold.income[50K-75K]      -0.0745794407 0.04964180
## Xhousehold.income[5K-12K]        0.0006416684 0.03069365
## Xhousehold.income[75K-100K]     -0.0795695287 0.05258123
## Xhigh.educBachelor               0.0583576388 0.05937596
## Xhigh.educHS Diploma/GED        0.0285592657 0.03642909
## Xhigh.educPost Graduate Degree   0.0959137805 0.06634693
## Xhigh.educSome College           0.0785885850 0.05419584
## Xdemo_race_hispanic1             0.0012658639 0.02498598

```

### Male participants

```

##
## Family: gaussian
## Link function: identity
##
## Formula:
## cbcl_scr_syn_internal_r ~ PDS_score + race.ethnicity.5level +
##   interview_age + bmi + household.income + high.educ + demo_race_hispanic
##
## Parametric coefficients:
##              Estimate Std. Error t value Pr(>|t|)
## (Intercept)   3.153877   2.137007   1.476 0.140111
## PDS_score      0.514573   0.213455   2.411 0.015993 *
## race.ethnicity.5levelBlack -0.619868   0.876649  -0.707 0.479576
## race.ethnicity.5levelMixed  1.093012   0.857615   1.274 0.202610
## race.ethnicity.5levelOther  0.005758   0.975858   0.006 0.995293
## race.ethnicity.5levelWhite  0.836153   0.807256   1.036 0.300395
## interview_age  0.007705   0.014707   0.524 0.600395
## bmi            0.038066   0.030309   1.256 0.209254
## household.income[>=200K]   -3.161721   0.817944  -3.865 0.000114 ***
## household.income[100K-200K] -2.502614   0.762334  -3.283 0.001042 **
## household.income[12K-16K]  -0.374511   0.979349  -0.382 0.702191
## household.income[16K-25K]   0.020226   0.819689   0.025 0.980316
## household.income[25K-35K]  -0.075257   0.821517  -0.092 0.927018
## household.income[35K-50K]  -1.121805   0.777926  -1.442 0.149413
## household.income[50K-75K]  -1.608016   0.755315  -2.129 0.033355 *
## household.income[5K-12K]   -0.081566   0.858887  -0.095 0.924349
## household.income[75K-100K] -2.670305   0.777145  -3.436 0.000600 ***
## high.educBachelor           1.514557   0.769991   1.967 0.049294 *
## high.educHS Diploma/GED    -0.856803   0.763039  -1.123 0.261594
## high.educPost Graduate Degree 0.764688   0.773156   0.989 0.322734
## high.educSome College       0.988420   0.731778   1.351 0.176908
## demo_race_hispanic1         0.143689   0.348732   0.412 0.680350
## ---

```

```

## Signif. codes:  0 '***' 0.001 '**' 0.01 '*' 0.05 '.' 0.1 ' ' 1
##
##
## R-sq.(adj) =  0.0341
## lmer.REML = 15995  Scale est. = 17.372    n = 2569

##
##              stdcoef      stdse
## X(Intercept)      0.000000000 0.00000000
## XPDS_score        0.0501268630 0.02079361
## Xrace.ethnicity.5levelBlack -0.0362801371 0.05130919
## Xrace.ethnicity.5levelMixed  0.0637975146 0.05005773
## Xrace.ethnicity.5levelOther  0.0002159450 0.03659994
## Xrace.ethnicity.5levelWhite  0.0689975585 0.06661302
## Xinterview_age    0.0103560104 0.01976723
## Xbmi               0.0256333593 0.02040975
## Xhousehold.income[>=200K] -0.1835245307 0.04747820
## Xhousehold.income[100K-200K] -0.2080418970 0.06337267
## Xhousehold.income[12K-16K]   -0.0096730945 0.02529523
## Xhousehold.income[16K-25K]   0.0007585704 0.03074276
## Xhousehold.income[25K-35K]  -0.0029754039 0.03248017
## Xhousehold.income[35K-50K]  -0.0557839022 0.03868390
## Xhousehold.income[50K-75K]  -0.1000650516 0.04700242
## Xhousehold.income[5K-12K]   -0.0026327267 0.02772259
## Xhousehold.income[75K-100K] -0.1700805605 0.04949893
## Xhigh.educBachelor          0.1188363857 0.06041566
## Xhigh.educHS Diploma/GED   -0.0404926101 0.03606134
## Xhigh.educPost Graduate Degree 0.0659720057 0.06670259
## Xhigh.educSome College      0.0773674151 0.05727903
## Xdemo_race_hispanic1       0.0100657488 0.02442952

```

## 1.2 Model: CBCL Anxious-Depressed ~ PDS

### Female participants

```

##
## Family: gaussian
## Link function: identity
##
## Formula:
## cbcl_scr_syn_anxdep_r ~ PDS_score + race.ethnicity.5level + interview_age +
##   bmi + household.income + high.educ + demo_race_hispanic
##
## Parametric coefficients:
##
##              Estimate Std. Error t value Pr(>|t|)
## (Intercept)      0.571226   1.208616   0.473   0.6365
## PDS_score         0.289623   0.095677   3.027   0.0025 **
## race.ethnicity.5levelBlack -0.208973   0.450502  -0.464   0.6428
## race.ethnicity.5levelMixed  0.779587   0.438563   1.778   0.0756 .
## race.ethnicity.5levelOther  0.149325   0.513557   0.291   0.7713
## race.ethnicity.5levelWhite  0.701081   0.409125   1.714   0.0867 .
## interview_age     0.009063   0.008759   1.035   0.3009
## bmi              -0.010226   0.017333  -0.590   0.5552
## household.income[>=200K] -0.915799   0.472779  -1.937   0.0529 .

```

```

## household.income[100K-200K]  -0.373934  0.440145  -0.850  0.3957
## household.income[12K-16K]    -0.026541  0.564057  -0.047  0.9625
## household.income[16K-25K]    -0.526282  0.487490  -1.080  0.2804
## household.income[25K-35K]     0.199691  0.460614   0.434  0.6647
## household.income[35K-50K]    -0.325213  0.447435  -0.727  0.4674
## household.income[50K-75K]    -0.226284  0.438393  -0.516  0.6058
## household.income[5K-12K]      0.123800  0.494970   0.250  0.8025
## household.income[75K-100K]   -0.200656  0.446142  -0.450  0.6529
## high.educBachelor             0.149894  0.407184   0.368  0.7128
## high.educHS Diploma/GED      -0.047246  0.408926  -0.116  0.9080
## high.educPost Graduate Degree  0.557669  0.414778   1.344  0.1789
## high.educSome College         0.379274  0.379997   0.998  0.3183
## demo_race_hispanic1          0.127401  0.195756   0.651  0.5152
## ---
## Signif. codes:  0 '***' 0.001 '**' 0.01 '*' 0.05 '.' 0.1 ' ' 1
##
##
## R-sq.(adj) =  0.0156
## lmer.REML = 12037  Scale est. = 6.6943  n = 2393

```

```

##
##                               stdcoef    stdse
## X(Intercept)                  0.00000000  0.00000000
## XPDS_score                     0.069359931  0.02291317
## Xrace.ethnicity.5levelBlack    -0.024779475  0.05341929
## Xrace.ethnicity.5levelMixed     0.084280830  0.04741279
## Xrace.ethnicity.5levelOther     0.010268662  0.03531593
## Xrace.ethnicity.5levelWhite     0.109929192  0.06415064
## Xinterview_age                 0.022268642  0.02151971
## Xbmi                           -0.012900425  0.02186513
## Xhousehold.income[>=200K]      -0.095868389  0.04949182
## Xhousehold.income[100K-200K]   -0.057671691  0.06788344
## Xhousehold.income[12K-16K]     -0.001300012  0.02762839
## Xhousehold.income[16K-25K]     -0.034732893  0.03217275
## Xhousehold.income[25K-35K]      0.015763630  0.03636097
## Xhousehold.income[35K-50K]     -0.030412850  0.04184265
## Xhousehold.income[50K-75K]     -0.025600843  0.04959792
## Xhousehold.income[5K-12K]       0.007684532  0.03072389
## Xhousehold.income[75K-100K]    -0.023631730  0.05254320
## Xhigh.educBachelor             0.021805335  0.05923371
## Xhigh.educHS Diploma/GED      -0.004202619  0.03637494
## Xhigh.educPost Graduate Degree  0.088994823  0.06619178
## Xhigh.educSome College         0.053974901  0.05407771
## Xdemo_race_hispanic1          0.016190376  0.02487704

```

## Male participants

```

##
## Family: gaussian
## Link function: identity
##
## Formula:
## cbcl_scr_syn_anxdep_r ~ PDS_score + race.ethnicity.5level + interview_age +
##   bmi + household.income + high.educ + demo_race_hispanic

```

```

##
## Parametric coefficients:
##
##           Estimate Std. Error t value Pr(>|t|)
## (Intercept)      2.333740   1.202275   1.941  0.05236 .
## PDS_score         0.267563   0.120169   2.227  0.02606 *
## race.ethnicity.5levelBlack -0.176229   0.491482  -0.359  0.71995
## race.ethnicity.5levelMixed  0.580194   0.480731   1.207  0.22758
## race.ethnicity.5levelOther  0.238373   0.547966   0.435  0.66359
## race.ethnicity.5levelWhite  0.572274   0.452749   1.264  0.20635
## interview_age    -0.007035   0.008294  -0.848  0.39640
## bmi              0.005614   0.017055   0.329  0.74206
## household.income[>=200K] -1.282161   0.457120  -2.805  0.00507 **
## household.income[100K-200K] -0.936176   0.426220  -2.196  0.02815 *
## household.income[12K-16K]  -0.096356   0.547878  -0.176  0.86041
## household.income[16K-25K]  -0.012544   0.458713  -0.027  0.97819
## household.income[25K-35K]   0.060759   0.460008   0.132  0.89493
## household.income[35K-50K]  -0.271776   0.435075  -0.625  0.53225
## household.income[50K-75K]  -0.689185   0.422468  -1.631  0.10294
## household.income[5K-12K]    0.050973   0.480615   0.106  0.91555
## household.income[75K-100K] -0.953654   0.434445  -2.195  0.02825 *
## high.educBachelor      1.194694   0.431171   2.771  0.00563 **
## high.educHS Diploma/GED -0.190006   0.427558  -0.444  0.65679
## high.educPost Graduate Degree 0.857192   0.432865   1.980  0.04778 *
## high.educSome College    0.730735   0.410062   1.782  0.07487 .
## demo_race_hispanic1     0.179448   0.195072   0.920  0.35771
## ---
## Signif. codes:  0 '***' 0.001 '**' 0.01 '*' 0.05 '.' 0.1 ' ' 1
##
##
## R-sq.(adj) =  0.0183
## lmer.REML = 13073 Scale est. = 7.132    n = 2569

##
##           stdcoef      stdse
## X(Intercept)      0.000000000 0.00000000
## XPDS_score        0.0468631813 0.02104745
## Xrace.ethnicity.5levelBlack -0.0185451581 0.05172010
## Xrace.ethnicity.5levelMixed  0.0608884820 0.05045026
## Xrace.ethnicity.5levelOther  0.0160743353 0.03695133
## Xrace.ethnicity.5levelWhite  0.0849052949 0.06717196
## Xinterview_age    -0.0170015444 0.02004399
## Xbmi              0.0067968208 0.02064873
## Xhousehold.income[>=200K] -0.1338122873 0.04770717
## Xhousehold.income[100K-200K] -0.1399256599 0.06370505
## Xhousehold.income[12K-16K]  -0.0044747020 0.02544297
## Xhousehold.income[16K-25K]  -0.0008458904 0.03093269
## Xhousehold.income[25K-35K]   0.0043191259 0.03270012
## Xhousehold.income[35K-50K]  -0.0242988139 0.03889901
## Xhousehold.income[50K-75K]  -0.0771100579 0.04726814
## Xhousehold.income[5K-12K]    0.0029581431 0.02789186
## Xhousehold.income[75K-100K] -0.1092112870 0.04975207
## Xhigh.educBachelor      0.1685401813 0.06082698
## Xhigh.educHS Diploma/GED -0.0161452782 0.03633062
## Xhigh.educPost Graduate Degree 0.1329648169 0.06714457
## Xhigh.educSome College    0.1028392442 0.05770974

```

```
## Xdemo_race_hispanic1          0.0226018647 0.02456973
```

### 1.3 Model: CBCL Withdrawn-Depressed ~ PDS

#### Female participants

```
##
## Family: gaussian
## Link function: identity
##
## Formula:
## cbcl_scr_syn_withdep_r ~ PDS_score + race.ethnicity.5level +
##   interview_age + bmi + household.income + high.educ + demo_race_hispanic
##
## Parametric coefficients:
##               Estimate Std. Error t value Pr(>|t|)
## (Intercept)    0.597114   0.631420   0.946 0.344413
## PDS_score      0.167783   0.049930   3.360 0.000791 ***
## race.ethnicity.5levelBlack -0.405523   0.234501  -1.729 0.083884 .
## race.ethnicity.5levelMixed -0.037332   0.228166  -0.164 0.870046
## race.ethnicity.5levelOther -0.296675   0.267095  -1.111 0.266789
## race.ethnicity.5levelWhite -0.075008   0.213035  -0.352 0.724800
## interview_age   0.003785   0.004588   0.825 0.409541
## bmi            0.010756   0.009034   1.191 0.233957
## household.income[>=200K] -0.790678   0.245498  -3.221 0.001296 **
## household.income[100K-200K] -0.567993   0.228434  -2.486 0.012970 *
## household.income[12K-16K] -0.250379   0.292350  -0.856 0.391845
## household.income[16K-25K] -0.358819   0.253532  -1.415 0.157117
## household.income[25K-35K] -0.008874   0.239098  -0.037 0.970398
## household.income[35K-50K] -0.527085   0.232381  -2.268 0.023407 *
## household.income[50K-75K] -0.477302   0.227514  -2.098 0.036019 *
## household.income[5K-12K] -0.047157   0.257508  -0.183 0.854714
## household.income[75K-100K] -0.483750   0.231611  -2.089 0.036848 *
## high.educBachelor -0.025672   0.210861  -0.122 0.903110
## high.educHS Diploma/GED  0.204823   0.212147   0.965 0.334405
## high.educPost Graduate Degree -0.006554   0.214832  -0.031 0.975666
## high.educSome College -0.004270   0.196842  -0.022 0.982694
## demo_race_hispanic1 -0.004556   0.101595  -0.045 0.964235
## ---
## Signif. codes:  0 '***' 0.001 '**' 0.01 '*' 0.05 '.' 0.1 ' ' 1
##
##
## R-sq.(adj) =  0.0224
## lmer.REML =  8972 Scale est. = 2.2943    n = 2393

##               stdcoef      stdse
## X(Intercept)    0.000000000 0.000000000
## XPDS_score      0.076640589 0.02280740
## Xrace.ethnicity.5levelBlack -0.091717622 0.05303723
## Xrace.ethnicity.5levelMixed -0.007698039 0.04704908
## Xrace.ethnicity.5levelOther -0.038913410 0.03503350
## Xrace.ethnicity.5levelWhite -0.022433095 0.06371354
## Xinterview_age  0.017737127 0.02150353
```

```

## Xbmi                0.025879703 0.02173793
## Xhousehold.income[>=200K] -0.157874098 0.04901836
## Xhousehold.income[100K-200K] -0.167088747 0.06719942
## Xhousehold.income[12K-16K] -0.023391914 0.02731317
## Xhousehold.income[16K-25K] -0.045168323 0.03191474
## Xhousehold.income[25K-35K] -0.001336075 0.03600067
## Xhousehold.income[35K-50K] -0.094016860 0.04145020
## Xhousehold.income[50K-75K] -0.102998086 0.04909572
## Xhousehold.income[5K-12K] -0.005583114 0.03048761
## Xhousehold.income[75K-100K] -0.108667569 0.05202825
## Xhigh.educBachelor -0.007123087 0.05850750
## Xhigh.educHS Diploma/GED 0.034751307 0.03599393
## Xhigh.educPost Graduate Degree -0.001994812 0.06539168
## Xhigh.educSome College -0.001159097 0.05343082
## Xdemo_race_hispanic1 -0.001104318 0.02462576

```

### Male participants

```

##
## Family: gaussian
## Link function: identity
##
## Formula:
## cbcl_scr_syn_withdep_r ~ PDS_score + race.ethnicity.5level +
##   interview_age + bmi + household.income + high.educ + demo_race_hispanic
##
## Parametric coefficients:
##               Estimate Std. Error t value Pr(>|t|)
## (Intercept)    0.408095   0.694164   0.588 0.556655
## PDS_score      0.128173   0.069601   1.842 0.065661 .
## race.ethnicity.5levelBlack -0.168999   0.284411  -0.594 0.552427
## race.ethnicity.5levelMixed  0.249080   0.278540   0.894 0.371283
## race.ethnicity.5levelOther -0.018398   0.317402  -0.058 0.953783
## race.ethnicity.5levelWhite  0.085257   0.261940   0.325 0.744841
## interview_age   0.010816   0.004786   2.260 0.023929 *
## bmi            0.001416   0.009881   0.143 0.886039
## household.income[>=200K] -1.041422   0.265104  -3.928 8.78e-05 ***
## household.income[100K-200K] -0.858382   0.247453  -3.469 0.000531 ***
## household.income[12K-16K]  0.046525   0.318434   0.146 0.883850
## household.income[16K-25K]  0.061961   0.266491   0.233 0.816164
## household.income[25K-35K] -0.074734   0.267179  -0.280 0.779720
## household.income[35K-50K] -0.455497   0.252901  -1.801 0.071808 .
## household.income[50K-75K] -0.596437   0.245477  -2.430 0.015180 *
## household.income[5K-12K]  -0.029847   0.279416  -0.107 0.914942
## household.income[75K-100K] -0.931872   0.252411  -3.692 0.000227 ***
## high.educBachelor  0.001744   0.250045   0.007 0.994435
## high.educHS Diploma/GED -0.576591   0.247838  -2.326 0.020071 *
## high.educPost Graduate Degree -0.253336   0.251114  -1.009 0.313143
## high.educSome College -0.109464   0.237591  -0.461 0.645034
## demo_race_hispanic1 -0.063744   0.110151  -0.579 0.562846
## ---
## Signif. codes:  0 '***' 0.001 '**' 0.01 '*' 0.05 '.' 0.1 ' ' 1
##

```

```

##
## R-sq.(adj) = 0.0369
## lmer.REML = 10286 Scale est. = 2.085 n = 2569

##
##
##          stdcoef      stdse
## X(Intercept)      0.000000000 0.00000000
## XPDS_score        0.0384618415 0.02088585
## Xrace.ethnicity.5levelBlack -0.0304694738 0.05127758
## Xrace.ethnicity.5levelMixed  0.0447845495 0.05008163
## Xrace.ethnicity.5levelOther -0.0021255150 0.03667026
## Xrace.ethnicity.5levelWhite  0.0216715854 0.06658259
## Xinterview_age     0.0447804938 0.01981775
## Xbmi               0.0029377917 0.02049636
## Xhousehold.income[>=200K] -0.1862123890 0.04740219
## Xhousehold.income[100K-200K] -0.2198107481 0.06336677
## Xhousehold.income[12K-16K]  0.0037016688 0.02533564
## Xhousehold.income[16K-25K]  0.0071584658 0.03078838
## Xhousehold.income[25K-35K] -0.0091018424 0.03253986
## Xhousehold.income[35K-50K] -0.0697731763 0.03873949
## Xhousehold.income[50K-75K] -0.1143320498 0.04705584
## Xhousehold.income[5K-12K]   -0.0029675861 0.02778183
## Xhousehold.income[75K-100K] -0.1828359245 0.04952367
## Xhigh.educBachelor          0.0004215489 0.06043572
## Xhigh.educHS Diploma/GED   -0.0839409517 0.03608062
## Xhigh.educPost Graduate Degree -0.0673261868 0.06673571
## Xhigh.educSome College     -0.0263937134 0.05728717
## Xdemo_race_hispanic1       -0.0137553757 0.02376965

```

## 1.4 Model: CBCL Depressed DSM-5 ~ PDS

### Female participants

```

##
## Family: gaussian
## Link function: identity
##
## Formula:
## cbcl_scr_dsm5_depress_r ~ PDS_score + race.ethnicity.5level +
##   interview_age + bmi + household.income + high.educ + demo_race_hispanic
##
## Parametric coefficients:
##
##          Estimate Std. Error t value Pr(>|t|)
## (Intercept)      1.2070529  0.7372460   1.637  0.1017
## PDS_score         0.1130118  0.0584081   1.935  0.0531
## race.ethnicity.5levelBlack -0.1890686  0.2748074  -0.688  0.4915
## race.ethnicity.5levelMixed  0.1951616  0.2676648   0.729  0.4660
## race.ethnicity.5levelOther -0.2411360  0.3135123  -0.769  0.4419
## race.ethnicity.5levelWhite  0.2112751  0.2495603   0.847  0.3973
## interview_age     0.0006124  0.0053434   0.115  0.9088
## bmi              0.0034458  0.0105839   0.326  0.7448
## household.income[>=200K] -0.7191737  0.2887547  -2.491  0.0128 *
## household.income[100K-200K] -0.5574300  0.2688546  -2.073  0.0382 *
## household.income[12K-16K]  0.0074610  0.3445896   0.022  0.9827

```

```

## household.income[16K-25K]      -0.4500986  0.2977632  -1.512  0.1308
## household.income[25K-35K]      -0.0392555  0.2813844  -0.140  0.8891
## household.income[35K-50K]      -0.3336823  0.2732968  -1.221  0.2222
## household.income[50K-75K]      -0.4432217  0.2677925  -1.655  0.0980
## household.income[5K-12K]       0.1637256  0.3023181   0.542  0.5882
## household.income[75K-100K]     -0.4576971  0.2725190  -1.680  0.0932
## high.educBachelor              -0.2115200  0.2487655  -0.850  0.3953
## high.educHS Diploma/GED        -0.1026540  0.2497984  -0.411  0.6811
## high.educPost Graduate Degree  -0.0302769  0.2533932  -0.119  0.9049
## high.educSome College          -0.0896484  0.2321673  -0.386  0.6994
## demo_race_hispanic1            -0.0097103  0.1192277  -0.081  0.9351
## ---
## Signif. codes:  0 '***' 0.001 '**' 0.01 '*' 0.05 '.' 0.1 ' ' 1
##
##
## R-sq.(adj) =  0.0104
## lmer.REML = 9694.8  Scale est. = 2.4385    n = 2393

```

```

##
##          stdcoef      stdse
## X(Intercept)          0.000000000  0.000000000
## XPDS_score            0.0445728494  0.02303665
## Xrace.ethnicity.5levelBlack -0.0369225047  0.05366610
## Xrace.ethnicity.5levelMixed  0.0347479419  0.04765692
## Xrace.ethnicity.5levelOther  -0.0273095536  0.03550644
## Xrace.ethnicity.5levelWhite  0.0545587163  0.06444531
## Xinterview_age        0.0024778775  0.02162188
## Xbmi                   0.0071587457  0.02198857
## Xhousehold.income[>=200K]    -0.1239880580  0.04978231
## Xhousehold.income[100K-200K] -0.1415887716  0.06828982
## Xhousehold.income[12K-16K]   0.0006018683  0.02779748
## Xhousehold.income[16K-25K]   -0.0489216348  0.03236416
## Xhousehold.income[25K-35K]   -0.0051035235  0.03658215
## Xhousehold.income[35K-50K]   -0.0513917052  0.04209150
## Xhousehold.income[50K-75K]   -0.0825831326  0.04989635
## Xhousehold.income[5K-12K]    0.0167372683  0.03090525
## Xhousehold.income[75K-100K]  -0.0887752885  0.05285800
## Xhigh.educBachelor          -0.0506758357  0.05959908
## Xhigh.educHS Diploma/GED    -0.0150384786  0.03659465
## Xhigh.educPost Graduate Degree -0.0079573691  0.06659683
## Xhigh.educSome College       -0.0210112257  0.05441392
## Xdemo_race_hispanic1        -0.0020322978  0.02495345

```

## Male participants

```

##
## Family: gaussian
## Link function: identity
##
## Formula:
## cbcl_scr_dsm5_depress_r ~ PDS_score + race.ethnicity.5level +
##   interview_age + bmi + household.income + high.educ + demo_race_hispanic
##
## Parametric coefficients:

```



```

##              Estimate Std. Error t value Pr(>|t|)
## (Intercept)      0.851071   0.815348   1.044 0.296671
## PDS_score        0.090309   0.081534   1.108 0.268129
## race.ethnicity.5levelBlack -0.142114   0.334429  -0.425 0.670912
## race.ethnicity.5levelMixed  0.265217   0.327275   0.810 0.417796
## race.ethnicity.5levelOther -0.017185   0.372525  -0.046 0.963208
## race.ethnicity.5levelWhite  0.166805   0.307970   0.542 0.588122
## interview_age    0.007236   0.005614   1.289 0.197594
## bmi              0.001601   0.011577   0.138 0.890035
## household.income[>=200K]   -1.154639   0.312000  -3.701 0.000220 ***
## household.income[100K-200K] -1.060968   0.290907  -3.647 0.000271 ***
## household.income[12K-16K]   0.071333   0.373882   0.191 0.848706
## household.income[16K-25K]  -0.393897   0.312912  -1.259 0.208214
## household.income[25K-35K]  -0.314674   0.313637  -1.003 0.315807
## household.income[35K-50K]  -0.667159   0.296976  -2.247 0.024757 *
## household.income[50K-75K]  -0.744978   0.288320  -2.584 0.009825 **
## household.income[5K-12K]   -0.161025   0.327938  -0.491 0.623453
## household.income[75K-100K] -0.973878   0.296607  -3.283 0.001040 **
## high.educBachelor      0.421055   0.293843   1.433 0.152002
## high.educHS Diploma/GED  -0.332825   0.291197  -1.143 0.253164
## high.educPost Graduate Degree 0.094430   0.295066   0.320 0.748971
## high.educSome College    0.381811   0.279236   1.367 0.171639
## demo_race_hispanic1     -0.056162   0.132099  -0.425 0.670762
## ---
## Signif. codes:  0 '***' 0.001 '**' 0.01 '*' 0.05 '.' 0.1 ' ' 1
##
##
## R-sq.(adj) =  0.0247
## lmer.REML = 11092 Scale est. = 2.5914    n = 2569

##              stdcoef      stdse
## X(Intercept)      0.000000000 0.000000000
## XPDS_score        0.023231845 0.02097449
## Xrace.ethnicity.5levelBlack -0.021965279 0.05168951
## Xrace.ethnicity.5levelMixed  0.040879958 0.05044531
## Xrace.ethnicity.5levelOther -0.001702091 0.03689594
## Xrace.ethnicity.5levelWhite  0.036348554 0.06710975
## Xinterview_age    0.025682829 0.01992811
## Xbmi              0.002846536 0.02058632
## Xhousehold.income[>=200K]   -0.176988993 0.04782494
## Xhousehold.income[100K-200K] -0.232910161 0.06386166
## Xhousehold.income[12K-16K]   0.004865407 0.02550147
## Xhousehold.income[16K-25K]  -0.039012697 0.03099171
## Xhousehold.income[25K-35K]  -0.032854289 0.03274596
## Xhousehold.income[35K-50K]  -0.087609383 0.03899808
## Xhousehold.income[50K-75K]  -0.122423478 0.04738011
## Xhousehold.income[5K-12K]   -0.013725249 0.02795239
## Xhousehold.income[75K-100K] -0.163805276 0.04988905
## Xhigh.educBachelor      0.087243276 0.06088474
## Xhigh.educHS Diploma/GED  -0.041537529 0.03634219
## Xhigh.educPost Graduate Degree 0.021513739 0.06722399
## Xhigh.educSome College    0.078921228 0.05771870
## Xdemo_race_hispanic1     -0.010389556 0.02443730

```

## 1.5 Model: CBCL internalizing factor ~ Pubertal category

### Female participants

```
##
## Family: gaussian
## Link function: identity
##
## Formula:
## cbcl_scr_syn_internal_r ~ pds_p_ss_category + race.ethnicity.5level +
##   interview_age + bmi + household.income + high.educ + demo_race_hispanic
##
## Parametric coefficients:
##
##           Estimate Std. Error t value Pr(>|t|)
## (Intercept)      0.515354   2.220846   0.232  0.81652
## pds_p_ss_categoryEarly  0.181819   0.304480   0.597  0.55047
## pds_p_ss_categoryLate  0.690550   0.770801   0.896  0.37040
## pds_p_ss_categoryMid   0.756328   0.295630   2.558  0.01058 *
## race.ethnicity.5levelBlack -0.489177   0.804046  -0.608  0.54298
## race.ethnicity.5levelMixed  1.186664   0.783467   1.515  0.13000
## race.ethnicity.5levelOther -0.048921   0.916861  -0.053  0.95745
## race.ethnicity.5levelWhite  1.170397   0.730940   1.601  0.10946
## interview_age         0.028234   0.015801   1.787  0.07409 .
## bmi                   0.018041   0.032035   0.563  0.57337
## household.income[>=200K] -2.484994   0.845716  -2.938  0.00333 **
## household.income[100K-200K] -1.530520   0.787420  -1.944  0.05205 .
## household.income[12K-16K]  -0.296461   1.008385  -0.294  0.76879
## household.income[16K-25K]  -1.203397   0.870334  -1.383  0.16689
## household.income[25K-35K]  -0.007737   0.823128  -0.009  0.99250
## household.income[35K-50K]  -1.280262   0.799148  -1.602  0.10928
## household.income[50K-75K]  -1.178881   0.783712  -1.504  0.13266
## household.income[5K-12K]    0.022507   0.883395   0.025  0.97968
## household.income[75K-100K] -1.221179   0.797590  -1.531  0.12588
## high.educBachelor         0.660875   0.729065   0.906  0.36478
## high.educHS Diploma/GED   0.577993   0.731066   0.791  0.42925
## high.educPost Graduate Degree 1.021730   0.742951   1.375  0.16919
## high.educSome College     1.003400   0.680385   1.475  0.14041
## demo_race_hispanic1      -0.030365   0.350722  -0.087  0.93101
## ---
## Signif. codes:  0 '***' 0.001 '**' 0.01 '*' 0.05 '.' 0.1 ' ' 1
##
##
## R-sq.(adj) =  0.0177
## lmer.REML = 14757  Scale est. = 17.826   n = 2393

##
##           stdcoef      stdse
## X(Intercept)      0.000000000  0.00000000
## Xpds_p_ss_categoryEarly  0.0142308189  0.02383139
## Xpds_p_ss_categoryLate  0.0196565564  0.02194092
## Xpds_p_ss_categoryMid   0.0690944061  0.02700731
## Xrace.ethnicity.5levelBlack -0.0325537778  0.05350772
## Xrace.ethnicity.5levelMixed  0.0719989748  0.04753565
## Xrace.ethnicity.5levelOther -0.0018880452  0.03538506
## Xrace.ethnicity.5levelWhite  0.1029942426  0.06432230
```

```

## Xinterview_age          0.0389323247 0.02178818
## Xbmi                    0.0127728554 0.02267986
## Xhousehold.income[>=200K] -0.1459941203 0.04968608
## Xhousehold.income[100K-200K] -0.1324772737 0.06815678
## Xhousehold.income[12K-16K] -0.0081495718 0.02772002
## Xhousehold.income[16K-25K] -0.0445724063 0.03223615
## Xhousehold.income[25K-35K] -0.0003427720 0.03646705
## Xhousehold.income[35K-50K] -0.0671927863 0.04194218
## Xhousehold.income[50K-75K] -0.0748521380 0.04976120
## Xhousehold.income[5K-12K]  0.0007840619 0.03077421
## Xhousehold.income[75K-100K] -0.0807155274 0.05271786
## Xhigh.educBachelor      0.0539551250 0.05952225
## Xhigh.educHS Diploma/GED 0.0288545448 0.03649626
## Xhigh.educPost Graduate Degree 0.0915079001 0.06654002
## Xhigh.educSome College  0.0801395833 0.05434097
## Xdemo_race_hispanic1    -0.0021656954 0.02501383

```

## Male participants

```

##
## Family: gaussian
## Link function: identity
##
## Formula:
## cbcl_scr_syn_internal_r ~ pds_p_ss_category + race.ethnicity.5level +
##   interview_age + bmi + household.income + high.educ + demo_race_hispanic
##
## Parametric coefficients:
##
##               Estimate Std. Error t value Pr(>|t|)
## (Intercept)    3.341790   2.141654   1.560 0.118795
## pds_p_ss_categoryEarly  0.336956   0.269998   1.248 0.212149
## pds_p_ss_categoryLate -0.437416   1.620316  -0.270 0.787215
## pds_p_ss_categoryMid   1.315482   0.519604   2.532 0.011411 *
## race.ethnicity.5levelBlack -0.546024   0.875812  -0.623 0.533046
## race.ethnicity.5levelMixed  1.173093   0.858244   1.367 0.171792
## race.ethnicity.5levelOther  0.057896   0.976330   0.059 0.952718
## race.ethnicity.5levelWhite  0.933042   0.807994   1.155 0.248296
## interview_age         0.009916   0.014655   0.677 0.498723
## bmi                  0.041057   0.030212   1.359 0.174286
## household.income[>=200K] -3.203710   0.819200  -3.911 9.44e-05 ***
## household.income[100K-200K] -2.542325   0.763660  -3.329 0.000884 ***
## household.income[12K-16K] -0.454010   0.981553  -0.463 0.643732
## household.income[16K-25K] -0.012437   0.821120  -0.015 0.987917
## household.income[25K-35K] -0.088994   0.824601  -0.108 0.914064
## household.income[35K-50K] -1.155246   0.779254  -1.483 0.138330
## household.income[50K-75K] -1.630575   0.756133  -2.156 0.031141 *
## household.income[5K-12K]  -0.114249   0.859707  -0.133 0.894289
## household.income[75K-100K] -2.716858   0.778160  -3.491 0.000489 ***
## high.educBachelor      1.512679   0.770483   1.963 0.049722 *
## high.educHS Diploma/GED -0.896291   0.764117  -1.173 0.240915
## high.educPost Graduate Degree 0.763686   0.773618   0.987 0.323657
## high.educSome College   0.962480   0.732667   1.314 0.189077
## demo_race_hispanic1    0.114078   0.349170   0.327 0.743913

```

```

## ---
## Signif. codes:  0 '***' 0.001 '**' 0.01 '*' 0.05 '.' 0.1 ' ' 1
##
##
## R-sq.(adj) =  0.034
## lmer.REML = 15990  Scale est. = 17.353    n = 2569

##
##                stdcoef      stdse
## X(Intercept)      0.00000000 0.00000000
## Xpds_p_ss_categoryEarly  0.025214991 0.02020444
## Xpds_p_ss_categoryLate -0.005322162 0.01971482
## Xpds_p_ss_categoryMid   0.052009967 0.02054348
## Xrace.ethnicity.5levelBlack -0.031958093 0.05126022
## Xrace.ethnicity.5levelMixed  0.068471742 0.05009445
## Xrace.ethnicity.5levelOther  0.002171416 0.03661764
## Xrace.ethnicity.5levelWhite  0.076992637 0.06667397
## Xinterview_age      0.013327499 0.01969782
## Xbmi                0.027647472 0.02034488
## Xhousehold.income[>=200K] -0.185961807 0.04755110
## Xhousehold.income[100K-200K] -0.211343013 0.06348289
## Xhousehold.income[12K-16K]  -0.011726454 0.02535215
## Xhousehold.income[16K-25K]  -0.000466441 0.03079644
## Xhousehold.income[25K-35K]  -0.003518552 0.03260209
## Xhousehold.income[35K-50K]  -0.057446858 0.03874992
## Xhousehold.income[50K-75K]  -0.101468899 0.04705331
## Xhousehold.income[5K-12K]   -0.003687653 0.02774904
## Xhousehold.income[75K-100K] -0.173045711 0.04956360
## Xhigh.educBachelor        0.118689023 0.06045423
## Xhigh.educHS Diploma/GED  -0.042358800 0.03611225
## Xhigh.educPost Graduate Degree  0.065885606 0.06674247
## Xhigh.educSome College     0.075336965 0.05734861
## Xdemo_race_hispanic1      0.007991434 0.02446023

```

## 1.6 Model: CBCL Anxious-Depressed ~ Pubertal category

### Female participants

```

##
## Family: gaussian
## Link function: identity
##
## Formula:
## cbcl_scr_syn_anxdep_r ~ pds_p_ss_category + race.ethnicity.5level +
##   interview_age + bmi + household.income + high.educ + demo_race_hispanic
##
## Parametric coefficients:
##
##                Estimate Std. Error t value Pr(>|t|)
## (Intercept)      0.712308   1.249598   0.570   0.5687
## pds_p_ss_categoryEarly  0.205193   0.171892   1.194   0.2327
## pds_p_ss_categoryLate  0.262515   0.434926   0.604   0.5462
## pds_p_ss_categoryMid   0.375537   0.166525   2.255   0.0242 *
## race.ethnicity.5levelBlack -0.154278   0.450501  -0.342   0.7320
## race.ethnicity.5levelMixed  0.789507   0.439111   1.798   0.0723 .

```

```

## race.ethnicity.5levelOther      0.159298  0.514129  0.310  0.7567
## race.ethnicity.5levelWhite      0.704038  0.409586  1.719  0.0858
## interview_age                    0.010598  0.008914  1.189  0.2346
## bmi                              -0.012694  0.018014  -0.705  0.4811
## household.income[>=200K]        -0.918478  0.473990  -1.938  0.0528
## household.income[100K-200K]     -0.374602  0.441262  -0.849  0.3960
## household.income[12K-16K]       -0.101662  0.564628  -0.180  0.8571
## household.income[16K-25K]       -0.521964  0.488287  -1.069  0.2852
## household.income[25K-35K]        0.161469  0.461399  0.350  0.7264
## household.income[35K-50K]       -0.344987  0.448011  -0.770  0.4414
## household.income[50K-75K]       -0.230054  0.439195  -0.524  0.6005
## household.income[5K-12K]         0.129438  0.495970  0.261  0.7941
## household.income[75K-100K]      -0.209103  0.447042  -0.468  0.6400
## high.educBachelor                0.128066  0.407970  0.314  0.7536
## high.educHS Diploma/GED         -0.040225  0.409457  -0.098  0.9218
## high.educPost Graduate Degree    0.537975  0.415769  1.294  0.1958
## high.educSome College            0.392179  0.380811  1.030  0.3032
## demo_race_hispanic1              0.103386  0.195826  0.528  0.5976
## ---
## Signif. codes:  0 '***' 0.001 '**' 0.01 '*' 0.05 '.' 0.1 ' ' 1
##
##
## R-sq.(adj) =  0.0136
## lmer.REML = 12042  Scale est. = 6.7337  n = 2393

##
##          stdcoef      stdse
## X(Intercept)          0.00000000  0.00000000
## Xpds_p_ss_categoryEarly  0.028616651  0.02397244
## Xpds_p_ss_categoryLate   0.013314732  0.02205940
## Xpds_p_ss_categoryMid    0.061129570  0.02710673
## Xrace.ethnicity.5levelBlack -0.018293806  0.05341911
## Xrace.ethnicity.5levelMixed  0.085353282  0.04747212
## Xrace.ethnicity.5levelOther  0.010954477  0.03535523
## Xrace.ethnicity.5levelWhite  0.110392964  0.06422297
## Xinterview_age          0.026038142  0.02190216
## Xbmi                    -0.016012845  0.02272385
## Xhousehold.income[>=200K] -0.096148806  0.04961856
## Xhousehold.income[100K-200K] -0.057774653  0.06805564
## Xhousehold.income[12K-16K]  -0.004979540  0.02765638
## Xhousehold.income[16K-25K]  -0.034447946  0.03222537
## Xhousehold.income[25K-35K]   0.012746393  0.03642298
## Xhousehold.income[35K-50K]  -0.032262042  0.04189652
## Xhousehold.income[50K-75K]  -0.026027358  0.04968860
## Xhousehold.income[5K-12K]    0.008034517  0.03078597
## Xhousehold.income[75K-100K] -0.024626499  0.05264923
## Xhigh.educBachelor          0.018630031  0.05934812
## Xhigh.educHS Diploma/GED   -0.003578076  0.03642216
## Xhigh.educPost Graduate Degree 0.085851921  0.06634991
## Xhigh.educSome College      0.055811391  0.05419360
## Xdemo_race_hispanic1        0.013138394  0.02488582

```

## Male participants

```
##
```

```

## Family: gaussian
## Link function: identity
##
## Formula:
## cbcl_scr_syn_anxdep_r ~ pds_p_ss_category + race.ethnicity.5level +
##   interview_age + bmi + household.income + high.educ + demo_race_hispanic
##
## Parametric coefficients:
##
##           Estimate Std. Error t value Pr(>|t|)
## (Intercept)      2.422466   1.204786   2.011  0.04446 *
## pds_p_ss_categoryEarly    0.144110   0.151965   0.948  0.34306
## pds_p_ss_categoryLate   -0.071611   0.909260  -0.079  0.93723
## pds_p_ss_categoryMid     0.731536   0.292463   2.501  0.01244 *
## race.ethnicity.5levelBlack -0.141292   0.491001  -0.288  0.77355
## race.ethnicity.5levelMixed  0.624893   0.481054   1.299  0.19406
## race.ethnicity.5levelOther  0.265797   0.548199   0.485  0.62782
## race.ethnicity.5levelWhite  0.623302   0.453141   1.376  0.16909
## interview_age          -0.005885   0.008265  -0.712  0.47649
## bmi                   0.007322   0.016999   0.431  0.66672
## household.income[>=200K]  -1.296193   0.457751  -2.832  0.00467 **
## household.income[100K-200K] -0.949878   0.426892  -2.225  0.02616 *
## household.income[12K-16K]  -0.132154   0.549044  -0.241  0.80981
## household.income[16K-25K]  -0.018957   0.459464  -0.041  0.96709
## household.income[25K-35K]   0.066068   0.461626   0.143  0.88621
## household.income[35K-50K]  -0.281288   0.435767  -0.645  0.51866
## household.income[50K-75K]  -0.695399   0.422871  -1.644  0.10020
## household.income[5K-12K]    0.038195   0.481025   0.079  0.93672
## household.income[75K-100K] -0.970095   0.434952  -2.230  0.02581 *
## high.educBachelor         1.196853   0.431415   2.774  0.00557 **
## high.educHS Diploma/GED   -0.210520   0.428124  -0.492  0.62295
## high.educPost Graduate Degree  0.860020   0.433089   1.986  0.04716 *
## high.educSome College     0.719882   0.410528   1.754  0.07963 .
## demo_race_hispanic1       0.162565   0.195304   0.832  0.40528
## ---
## Signif. codes:  0 '***' 0.001 '**' 0.01 '*' 0.05 '.' 0.1 ' ' 1
##
##
## R-sq.(adj) =  0.0182
## lmer.REML = 13070 Scale est. = 7.1372    n = 2569
##
##           stdcoef      stdse
## X(Intercept)      0.00000000  0.00000000
## Xpds_p_ss_categoryEarly    0.019389344  0.02044622
## Xpds_p_ss_categoryLate   -0.001566595  0.01989135
## Xpds_p_ss_categoryMid     0.052001981  0.02079003
## Xrace.ethnicity.5levelBlack -0.014868597  0.05166952
## Xrace.ethnicity.5levelMixed  0.065579410  0.05048424
## Xrace.ethnicity.5levelOther  0.017923621  0.03696706
## Xrace.ethnicity.5levelWhite  0.092476000  0.06723015
## Xinterview_age          -0.014222067  0.01997299
## Xbmi                   0.008864696  0.02058159
## Xhousehold.income[>=200K]  -0.135276753  0.04777298
## Xhousehold.income[100K-200K] -0.141973557  0.06380541
## Xhousehold.income[12K-16K]  -0.006137138  0.02549711

```

```

## Xhousehold.income[16K-25K]      -0.001278311 0.03098331
## Xhousehold.income[25K-35K]      0.004696506 0.03281518
## Xhousehold.income[35K-50K]     -0.025149264 0.03896092
## Xhousehold.income[50K-75K]     -0.077805250 0.04731328
## Xhousehold.income[5K-12K]       0.002216599 0.02791569
## Xhousehold.income[75K-100K]    -0.111094030 0.04981016
## Xhigh.educBachelor              0.168844765 0.06086141
## Xhigh.educHS Diploma/GED       -0.017888420 0.03637868
## Xhigh.educPost Graduate Degree  0.133403460 0.06717928
## Xhigh.educSome College          0.101311983 0.05777534
## Xdemo_race_hispanic1           0.020475393 0.02459902

```

## 1.7 Model: CBCL Withdrawn-Depressed ~ Pubertal category

### Female participants

```

##
## Family: gaussian
## Link function: identity
##
## Formula:
## cbcl_scr_syn_withdep_r ~ pds_p_ss_category + race.ethnicity.5level +
##   interview_age + bmi + household.income + high.educ + demo_race_hispanic
##
## Parametric coefficients:
##
##               Estimate Std. Error t value Pr(>|t|)
## (Intercept)      0.685287   0.652785   1.050  0.29392
## pds_p_ss_categoryEarly -0.014723   0.089968  -0.164  0.87002
## pds_p_ss_categoryLate  0.348598   0.227289   1.534  0.12523
## pds_p_ss_categoryMid   0.171908   0.086948   1.977  0.04814 *
## race.ethnicity.5levelBlack -0.379039   0.234582  -1.616  0.10627
## race.ethnicity.5levelMixed -0.027092   0.228506  -0.119  0.90563
## race.ethnicity.5levelOther -0.288256   0.267454  -1.078  0.28124
## race.ethnicity.5levelWhite -0.069125   0.213328  -0.324  0.74594
## interview_age        0.004899   0.004668   1.049  0.29413
## bmi                  0.009912   0.009392   1.055  0.29134
## household.income[>=200K] -0.796185   0.246163  -3.234  0.00124 **
## household.income[100K-200K] -0.570113   0.229054  -2.489  0.01288 *
## household.income[12K-16K]  -0.281132   0.292691  -0.961  0.33690
## household.income[16K-25K]  -0.368348   0.253986  -1.450  0.14712
## household.income[25K-35K]  -0.033463   0.239558  -0.140  0.88892
## household.income[35K-50K]  -0.545609   0.232715  -2.345  0.01913 *
## household.income[50K-75K]  -0.483238   0.227967  -2.120  0.03413 *
## household.income[5K-12K]   -0.054763   0.258043  -0.212  0.83195
## household.income[75K-100K] -0.494470   0.232114  -2.130  0.03325 *
## high.educBachelor        -0.035306   0.211327  -0.167  0.86733
## high.educHS Diploma/GED   0.205500   0.212471   0.967  0.33355
## high.educPost Graduate Degree -0.012979   0.215409  -0.060  0.95196
## high.educSome College     0.004969   0.197313   0.025  0.97991
## demo_race_hispanic1      -0.018204   0.101669  -0.179  0.85791
## ---
## Signif. codes:  0 '***' 0.001 '**' 0.01 '*' 0.05 '.' 0.1 ' ' 1
##

```

```

##
## R-sq.(adj) = 0.0201
## lmer.REML = 8979.8 Scale est. = 2.2981 n = 2393

##
##          stdcoef      stdse
## X(Intercept)          0.00000000 0.00000000
## Xpds_p_ss_categoryEarly -0.003916490 0.02393205
## Xpds_p_ss_categoryLate  0.033723996 0.02198833
## Xpds_p_ss_categoryMid   0.053374111 0.02699566
## Xrace.ethnicity.5levelBlack -0.085727616 0.05305563
## Xrace.ethnicity.5levelMixed -0.005586584 0.04711925
## Xrace.ethnicity.5levelOther -0.037809164 0.03508057
## Xrace.ethnicity.5levelWhite -0.020673578 0.06380134
## Xinterview_age         0.022957401 0.02187799
## Xbmi                   0.023849449 0.02259725
## Xhousehold.income[>=200K] -0.158973738 0.04915123
## Xhousehold.income[100K-200K] -0.167712165 0.06738156
## Xhousehold.income[12K-16K] -0.026265116 0.02734501
## Xhousehold.income[16K-25K] -0.046367869 0.03197196
## Xhousehold.income[25K-35K] -0.005038501 0.03606987
## Xhousehold.income[35K-50K] -0.097321128 0.04150962
## Xhousehold.income[50K-75K] -0.104278902 0.04919356
## Xhousehold.income[5K-12K] -0.006483617 0.03055096
## Xhousehold.income[75K-100K] -0.111075830 0.05214124
## Xhigh.educBachelor      -0.009796329 0.05863681
## Xhigh.educHS Diploma/GED  0.034866193 0.03604901
## Xhigh.educPost Graduate Degree -0.003950723 0.06556730
## Xhigh.educSome College   0.001348863 0.05355879
## Xdemo_race_hispanic1    -0.004412581 0.02464367

```

## Male participants

```

##
## Family: gaussian
## Link function: identity
##
## Formula:
## cbcl_scr_syn_withdep_r ~ pds_p_ss_category + race.ethnicity.5level +
##   interview_age + bmi + household.income + high.educ + demo_race_hispanic
##
## Parametric coefficients:
##
##          Estimate Std. Error t value Pr(>|t|)
## (Intercept)      0.4451090  0.6951047   0.640 0.522004
## pds_p_ss_categoryEarly  0.0535955  0.0879299   0.610 0.542231
## pds_p_ss_categoryLate -0.7354390  0.5269689  -1.396 0.162956
## pds_p_ss_categoryMid   0.4046924  0.1694073   2.389 0.016973 *
## race.ethnicity.5levelBlack -0.1386539  0.2838751  -0.488 0.625285
## race.ethnicity.5levelMixed  0.2762690  0.2785028   0.992 0.321302
## race.ethnicity.5levelOther  0.0012882  0.3172956   0.004 0.996761
## race.ethnicity.5levelWhite  0.1160494  0.2619508   0.443 0.657789
## interview_age         0.0116528  0.0047666   2.445 0.014565 *
## bmi                  0.0023750  0.0098428   0.241 0.809346
## household.income[>=200K] -1.0696878  0.2652498  -4.033 5.67e-05 ***

```



```

## household.income[100K-200K] -0.8863210 0.2476623 -3.579 0.000352 ***
## household.income[12K-16K] -0.0005363 0.3188739 -0.002 0.998658
## household.income[16K-25K] 0.0415734 0.2667227 0.156 0.876150
## household.income[25K-35K] -0.0910832 0.2679497 -0.340 0.733940
## household.income[35K-50K] -0.4789527 0.2531100 -1.892 0.058568 .
## household.income[50K-75K] -0.6138219 0.2455258 -2.500 0.012481 *
## household.income[5K-12K] -0.0502801 0.2794385 -0.180 0.857220
## household.income[75K-100K] -0.9602398 0.2525204 -3.803 0.000147 ***
## high.educBachelor -0.0120874 0.2500124 -0.048 0.961443
## high.educHS Diploma/GED -0.6043960 0.2479975 -2.437 0.014873 *
## high.educPost Graduate Degree -0.2652660 0.2510635 -1.057 0.290808
## high.educSome College -0.1321018 0.2377060 -0.556 0.578440
## demo_race_hispanic1 -0.0726855 0.1101105 -0.660 0.509240
## ---
## Signif. codes: 0 '***' 0.001 '**' 0.01 '*' 0.05 '.' 0.1 ' ' 1
##
##
## R-sq.(adj) = 0.0383
## lmer.REML = 10282 Scale est. = 2.0956 n = 2569

##
## stdcoef stdse
## X(Intercept) 0.000000e+00 0.00000000
## Xpds_p_ss_categoryEarly 1.235450e-02 0.02026907
## Xpds_p_ss_categoryLate -2.756456e-02 0.01975101
## Xpds_p_ss_categoryMid 4.928762e-02 0.02063217
## Xrace.ethnicity.5levelBlack -2.499842e-02 0.05118089
## Xrace.ethnicity.5levelMixed 4.967321e-02 0.05007486
## Xrace.ethnicity.5levelOther 1.488270e-04 0.03665802
## Xrace.ethnicity.5levelWhite 2.949866e-02 0.06658540
## Xinterview_age 4.824700e-02 0.01973534
## Xbmi 4.926626e-03 0.02041741
## Xhousehold.income[>=200K] -1.912665e-01 0.04742824
## Xhousehold.income[100K-200K] -2.269651e-01 0.06342026
## Xhousehold.income[12K-16K] -4.267317e-05 0.02537064
## Xhousehold.income[16K-25K] 4.803083e-03 0.03081519
## Xhousehold.income[25K-35K] -1.109306e-02 0.03263368
## Xhousehold.income[35K-50K] -7.336613e-02 0.03877147
## Xhousehold.income[50K-75K] -1.176646e-01 0.04706527
## Xhousehold.income[5K-12K] -4.999254e-03 0.02778402
## Xhousehold.income[75K-100K] -1.884017e-01 0.04954519
## Xhigh.educBachelor -2.921513e-03 0.06042777
## Xhigh.educHS Diploma/GED -8.798885e-02 0.03610384
## Xhigh.educPost Graduate Degree -7.049666e-02 0.06672221
## Xhigh.educSome College -3.185198e-02 0.05731494
## Xdemo_race_hispanic1 -1.568491e-02 0.02376091

```

## 1.8 Model: CBCL Depressed DSM-5 ~ Pubertal category

### Female participants

```

##
## Family: gaussian
## Link function: identity

```

```

##
## Formula:
## cbcl_scr_dsm5_depress_r ~ pds_p_ss_category + race.ethnicity.5level +
##   interview_age + bmi + household.income + high.educ + demo_race_hispanic
##
## Parametric coefficients:
##
##           Estimate Std. Error t value Pr(>|t|)
## (Intercept)      1.254271   0.761815   1.646  0.0998 .
## pds_p_ss_categoryEarly -0.031469   0.104843  -0.300  0.7641
## pds_p_ss_categoryLate  0.127442   0.265291   0.480  0.6310
## pds_p_ss_categoryMid   0.127942   0.101585   1.259  0.2080
## race.ethnicity.5levelBlack -0.175222   0.274631  -0.638  0.5235
## race.ethnicity.5levelMixed  0.198858   0.267809   0.743  0.4578
## race.ethnicity.5levelOther -0.235300   0.313628  -0.750  0.4532
## race.ethnicity.5levelWhite  0.213269   0.249686   0.854  0.3931
## interview_age        0.001470   0.005435   0.271  0.7868
## bmi                  0.003036   0.010991   0.276  0.7824
## household.income[>=200K] -0.713207   0.289257  -2.466  0.0137 *
## household.income[100K-200K] -0.551048   0.269311  -2.046  0.0409 *
## household.income[12K-16K] -0.005753   0.344647  -0.017  0.9867
## household.income[16K-25K] -0.453692   0.298004  -1.522  0.1280
## household.income[25K-35K] -0.047835   0.281624  -0.170  0.8651
## household.income[35K-50K] -0.341577   0.273423  -1.249  0.2117
## household.income[50K-75K] -0.440780   0.268058  -1.644  0.1002
## household.income[5K-12K]   0.164917   0.302684   0.545  0.5859
## household.income[75K-100K] -0.457504   0.272841  -1.677  0.0937 .
## high.educBachelor      -0.224131   0.249030  -0.900  0.3682
## high.educHS Diploma/GED -0.104752   0.249911  -0.419  0.6751
## high.educPost Graduate Degree -0.042354   0.253781  -0.167  0.8675
## high.educSome College   -0.090303   0.232462  -0.388  0.6977
## demo_race_hispanic1    -0.016516   0.119227  -0.139  0.8898
## ---
## Signif. codes:  0 '***' 0.001 '**' 0.01 '*' 0.05 '.' 0.1 ' ' 1
##
##
## R-sq.(adj) =  0.00935
## lmer.REML = 9698.5  Scale est. = 2.4591    n = 2393
##
##           stdcoef      stdse
## X(Intercept)      0.000000000 0.00000000
## Xpds_p_ss_categoryEarly -0.0072279099 0.02408050
## Xpds_p_ss_categoryLate  0.0106453589 0.02216007
## Xpds_p_ss_categoryMid   0.0342991655 0.02723315
## Xrace.ethnicity.5levelBlack -0.0342184344 0.05363160
## Xrace.ethnicity.5levelMixed  0.0354061352 0.04768267
## Xrace.ethnicity.5levelOther -0.0266486221 0.03551958
## Xrace.ethnicity.5levelWhite  0.0550736908 0.06447787
## Xinterview_age        0.0059493874 0.02199277
## Xbmi                  0.0063081780 0.02283452
## Xhousehold.income[>=200K] -0.1229593439 0.04986886
## Xhousehold.income[100K-200K] -0.1399677838 0.06840581
## Xhousehold.income[12K-16K] -0.0004641022 0.02780212
## Xhousehold.income[16K-25K] -0.0493122113 0.03239028
## Xhousehold.income[25K-35K] -0.0062189579 0.03661335

```

```

## Xhousehold.income[35K-50K]      -0.0526076176 0.04211086
## Xhousehold.income[50K-75K]      -0.0821282240 0.04994574
## Xhousehold.income[5K-12K]       0.0168590353 0.03094267
## Xhousehold.income[75K-100K]     -0.0887377464 0.05292043
## Xhigh.educBachelor               -0.0536971948 0.05966250
## Xhigh.educHS Diploma/GED        -0.0153458161 0.03661113
## Xhigh.educPost Graduate Degree  -0.0111314677 0.06669864
## Xhigh.educSome College           -0.0211646044 0.05448293
## Xdemo_race_hispanic1             -0.0034566063 0.02495321

```

## Male participants

```

##
## Family: gaussian
## Link function: identity
##
## Formula:
## cbcl_scr_dsm5_depress_r ~ pds_p_ss_category + race.ethnicity.5level +
##   interview_age + bmi + household.income + high.educ + demo_race_hispanic
##
## Parametric coefficients:
##               Estimate Std. Error t value Pr(>|t|)
## (Intercept)    0.919060   0.817124   1.125 0.260801
## pds_p_ss_categoryEarly  0.131314   0.103122   1.273 0.202997
## pds_p_ss_categoryLate -0.050509   0.618679  -0.082 0.934939
## pds_p_ss_categoryMid   0.228391   0.198509   1.151 0.250033
## race.ethnicity.5levelBlack -0.138135   0.334101  -0.413 0.679309
## race.ethnicity.5levelMixed  0.276470   0.327512   0.844 0.398664
## race.ethnicity.5levelOther -0.008044   0.372706  -0.022 0.982783
## race.ethnicity.5levelWhite  0.185103   0.308249   0.601 0.548227
## interview_age    0.007297   0.005595   1.304 0.192300
## bmi              0.001438   0.011540   0.125 0.900848
## household.income[>=200K] -1.156917   0.312470  -3.702 0.000218 ***
## household.income[100K-200K] -1.061862   0.291411  -3.644 0.000274 ***
## household.income[12K-16K]   0.060032   0.374722   0.160 0.872733
## household.income[16K-25K]  -0.399162   0.313456  -1.273 0.202985
## household.income[25K-35K]  -0.318832   0.314814  -1.013 0.311269
## household.income[35K-50K]  -0.669739   0.297481  -2.251 0.024448 *
## household.income[50K-75K]  -0.744708   0.288630  -2.580 0.009931 **
## household.income[5K-12K]   -0.167979   0.328248  -0.512 0.608875
## household.income[75K-100K] -0.978162   0.296995  -3.294 0.001003 **
## high.educBachelor    0.417229   0.294037   1.419 0.156031
## high.educHS Diploma/GED -0.340316   0.291614  -1.167 0.243316
## high.educPost Graduate Degree  0.090867   0.295247   0.308 0.758285
## high.educSome College  0.372376   0.279584   1.332 0.183014
## demo_race_hispanic1  -0.061302   0.132246  -0.464 0.643013
## ---
## Signif. codes:  0 '***' 0.001 '**' 0.01 '*' 0.05 '.' 0.1 ' ' 1
##
##
## R-sq.(adj) =  0.0244
## lmer.REML = 11090  Scale est. = 2.5922    n = 2569
##
##               stdcoef      stdse

```

```

## X(Intercept)                0.000000000 0.00000000
## Xpds_p_ss_categoryEarly     0.0259494285 0.02037828
## Xpds_p_ss_categoryLate     -0.0016228984 0.01987868
## Xpds_p_ss_categoryMid      0.0238456814 0.02072579
## Xrace.ethnicity.5levelBlack -0.0213502668 0.05163879
## Xrace.ethnicity.5levelMixed 0.0426144449 0.05048193
## Xrace.ethnicity.5levelOther -0.0007966726 0.03691385
## Xrace.ethnicity.5levelWhite 0.0403358870 0.06717050
## Xinterview_age             0.0258992541 0.01985907
## Xbmi                       0.0025570479 0.02052168
## Xhousehold.income[>=200K] -0.1773381487 0.04789707
## Xhousehold.income[100K-200K] -0.2331064804 0.06397243
## Xhousehold.income[12K-16K]  0.0040946171 0.02555875
## Xhousehold.income[16K-25K] -0.0395341011 0.03104560
## Xhousehold.income[25K-35K] -0.0332883855 0.03286885
## Xhousehold.income[35K-50K] -0.0879480927 0.03906437
## Xhousehold.income[50K-75K] -0.1223791109 0.04743111
## Xhousehold.income[5K-12K]   -0.0143179758 0.02797881
## Xhousehold.income[75K-100K] -0.1645258568 0.04995420
## Xhigh.educBachelor          0.0864504615 0.06092491
## Xhigh.educHS Diploma/GED   -0.0424723861 0.03639425
## Xhigh.educPost Graduate Degree 0.0207019540 0.06726512
## Xhigh.educSome College      0.0769710225 0.05779063
## Xdemo_race_hispanic1       -0.0113403929 0.02446448

```

## 1.9 Model: CBCL internalizing factor ~ Testosterone

### Female participants

```

##
## Family: gaussian
## Link function: identity
##
## Formula:
## cbcl_scr_syn_internal_r ~ hormone_scr_ert_mean + hormone_sal_end_min_since_midnight +
##   race.ethnicity.5level + interview_age + bmi + household.income +
##   high.educ + demo_race_hispanic
##
## Parametric coefficients:
##
##               Estimate Std. Error t value Pr(>|t|)
## (Intercept)    -2.202149   2.280520  -0.966 0.334335
## hormone_scr_ert_mean      0.001591   0.007417   0.215 0.830155
## hormone_sal_end_min_since_midnight 0.000333   0.000704   0.473 0.636225
## race.ethnicity.5levelBlack -0.564439   0.816203  -0.692 0.489299
## race.ethnicity.5levelMixed  1.216996   0.796092   1.529 0.126481
## race.ethnicity.5levelOther -0.257284   0.939620  -0.274 0.784251
## race.ethnicity.5levelWhite  1.214960   0.740255   1.641 0.100886
## interview_age      0.044621   0.015797   2.825 0.004778 **
## bmi                0.061797   0.032227   1.918 0.055302 .
## household.income[>=200K] -2.985044   0.872121  -3.423 0.000631 ***
## household.income[100K-200K] -2.097440   0.809473  -2.591 0.009630 **
## household.income[12K-16K]  -0.727069   1.048155  -0.694 0.487966
## household.income[16K-25K]  -1.411506   0.901101  -1.566 0.117395

```

```

## household.income[25K-35K]          -0.571138    0.846422   -0.675  0.499895
## household.income[35K-50K]         -1.576855    0.823333   -1.915  0.055597 .
## household.income[50K-75K]         -1.595383    0.809216   -1.972  0.048792 *
## household.income[5K-12K]          -0.556654    0.927818   -0.600  0.548595
## household.income[75K-100K]        -1.766294    0.820500   -2.153  0.031452 *
## high.educBachelor                  1.083622    0.760606    1.425  0.154393
## high.educHS Diploma/GED           1.135117    0.762582    1.489  0.136759
## high.educPost Graduate Degree       1.521768    0.774672    1.964  0.049611 *
## high.educSome College               1.495050    0.709347    2.108  0.035176 *
## demo_race_hispanic1                -0.097395    0.364022   -0.268  0.789069
## ---
## Signif. codes:  0 '***' 0.001 '**' 0.01 '*' 0.05 '.' 0.1 ' ' 1
##
##
## R-sq.(adj) =  0.0182
## lmer.REML = 13547  Scale est. = 17.516    n = 2194

##                stdcoef      stdse
## X(Intercept)      0.00000000  0.00000000
## Xhormone_scr_ert_mean      0.004840352  0.02256278
## Xhormone_sal_end_min_since_midnight  0.010829345  0.02289260
## Xrace.ethnicity.5levelBlack      -0.036638090  0.05298026
## Xrace.ethnicity.5levelMixed       0.073888624  0.04833387
## Xrace.ethnicity.5levelOther       -0.009980560  0.03644977
## Xrace.ethnicity.5levelWhite       0.106435657  0.06484950
## Xinterview_age           0.061698398  0.02184361
## Xbmi                    0.043354829  0.02260980
## Xhousehold.income[>=200K]        -0.173724052  0.05075584
## Xhousehold.income[100K-200K]      -0.181715502  0.07013011
## Xhousehold.income[12K-16K]        -0.019887697  0.02867044
## Xhousehold.income[16K-25K]        -0.051823166  0.03308374
## Xhousehold.income[25K-35K]        -0.025580886  0.03791066
## Xhousehold.income[35K-50K]        -0.083063963  0.04337066
## Xhousehold.income[50K-75K]        -0.100891812  0.05117474
## Xhousehold.income[5K-12K]         -0.018602294  0.03100586
## Xhousehold.income[75K-100K]       -0.117891092  0.05476419
## Xhigh.educBachelor              0.089130809  0.06256192
## Xhigh.educHS Diploma/GED         0.056629670  0.03804432
## Xhigh.educPost Graduate Degree     0.136046561  0.06925596
## Xhigh.educSome College            0.118987462  0.05645521
## Xdemo_race_hispanic1            -0.006961064  0.02601753

```

## Male participants

```

##
## Family: gaussian
## Link function: identity
##
## Formula:
## cbcl_scr_syn_internal_r ~ hormone_scr_ert_mean + hormone_sal_end_min_since_midnight +
##   race.ethnicity.5level + interview_age + bmi + household.income +
##   high.educ + demo_race_hispanic
##

```

```

## Parametric coefficients:
##
##           Estimate Std. Error t value Pr(>|t|)
## (Intercept)      3.4702040  2.2481331   1.544 0.122821
## hormone_scr_ert_mean      0.0046607  0.0078486   0.594 0.552682
## hormone_sal_end_min_since_midnight      0.0011017  0.0006821   1.615 0.106444
## race.ethnicity.5levelBlack      -0.4315199  0.8972575  -0.481 0.630609
## race.ethnicity.5levelMixed       1.0298655  0.8773329   1.174 0.240570
## race.ethnicity.5levelOther       0.0921606  0.9966106   0.092 0.926329
## race.ethnicity.5levelWhite       0.9603325  0.8254114   1.163 0.244761
## interview_age          0.0070208  0.0149788   0.469 0.639316
## bmi                    0.0301220  0.0311319   0.968 0.333363
## household.income[>=200K]      -3.3042047  0.8501915  -3.886 0.000105 ***
## household.income[100K-200K]    -2.7538721  0.7955897  -3.461 0.000547 ***
## household.income[12K-16K]      -0.2693924  1.0311979  -0.261 0.793929
## household.income[16K-25K]      -0.2937293  0.8548526  -0.344 0.731176
## household.income[25K-35K]      -0.9334087  0.8540096  -1.093 0.274518
## household.income[35K-50K]      -1.4377482  0.8114108  -1.772 0.076538 .
## household.income[50K-75K]      -1.9120582  0.7880493  -2.426 0.015327 *
## household.income[5K-12K]       -0.2427380  0.8845231  -0.274 0.783780
## household.income[75K-100K]     -2.8687056  0.8109027  -3.538 0.000411 ***
## high.educBachelor            1.2471681  0.7970956   1.565 0.117802
## high.educHS Diploma/GED      -0.7415617  0.7910872  -0.937 0.348651
## high.educPost Graduate Degree   0.4604767  0.8016954   0.574 0.565766
## high.educSome College         0.8569055  0.7587888   1.129 0.258883
## demo_race_hispanic1          -0.0396132  0.3573113  -0.111 0.911733
## ---
## Signif. codes:  0 '***' 0.001 '**' 0.01 '*' 0.05 '.' 0.1 ' ' 1
##
##
## R-sq.(adj) =  0.0297
## lmer.REML = 14777  Scale est. = 16.018    n = 2379

##
##           stdcoef      stdse
## X(Intercept)          0.00000000 0.00000000
## Xhormone_scr_ert_mean      0.012547944 0.02113050
## Xhormone_sal_end_min_since_midnight      0.035684718 0.02209578
## Xrace.ethnicity.5levelBlack      -0.025151973 0.05229840
## Xrace.ethnicity.5levelMixed       0.060850493 0.05183797
## Xrace.ethnicity.5levelOther       0.003525295 0.03812200
## Xrace.ethnicity.5levelWhite       0.079954464 0.06872133
## Xinterview_age          0.009614454 0.02051232
## Xbmi                    0.020532669 0.02122106
## Xhousehold.income[>=200K]      -0.197242683 0.05075171
## Xhousehold.income[100K-200K]    -0.231486475 0.06687611
## Xhousehold.income[12K-16K]      -0.006909980 0.02645047
## Xhousehold.income[16K-25K]      -0.010994076 0.03199651
## Xhousehold.income[25K-35K]      -0.037325815 0.03415075
## Xhousehold.income[35K-50K]      -0.071558081 0.04038468
## Xhousehold.income[50K-75K]      -0.120706707 0.04974892
## Xhousehold.income[5K-12K]       -0.008090662 0.02948191
## Xhousehold.income[75K-100K]     -0.184809496 0.05224047
## Xhigh.educBachelor            0.099482191 0.06358150
## Xhigh.educHS Diploma/GED      -0.035507148 0.03787851
## Xhigh.educPost Graduate Degree   0.040258808 0.07009106

```

```
## Xhigh.educSome College          0.067391134 0.05967477
## Xdemo_race_hispanic1           -0.002813609 0.02537876
```

## 1.10 Model: CBCL Anxious-Depressed ~ Testosterone

### Female participants

```
##
## Family: gaussian
## Link function: identity
##
## Formula:
## cbcl_scr_syn_anxdep_r ~ hormone_scr_ert_mean + hormone_sal_end_min_since_midnight +
##   race.ethnicity.5level + interview_age + bmi + household.income +
##   high.educ + demo_race_hispanic
##
## Parametric coefficients:
##
##           Estimate Std. Error t value Pr(>|t|)
## (Intercept)      -0.6772703   1.2914696  -0.524  0.6000
## hormone_scr_ert_mean      0.0004716   0.0042039   0.112  0.9107
## hormone_sal_end_min_since_midnight  0.0003276   0.0003970   0.825  0.4093
## race.ethnicity.5levelBlack      -0.1368519   0.4594753  -0.298  0.7659
## race.ethnicity.5levelMixed       0.8384900   0.4484098   1.870  0.0616 .
## race.ethnicity.5levelOther       0.1023564   0.5295352   0.193  0.8467
## race.ethnicity.5levelWhite       0.7245162   0.4167716   1.738  0.0823 .
## interview_age           0.0192288   0.0089747   2.143  0.0323 *
## bmi                     0.0059966   0.0182163   0.329  0.7420
## household.income[>=200K]      -1.0963527   0.4912061  -2.232  0.0257 *
## household.income[100K-200K]   -0.5902143   0.4558312  -1.295  0.1955
## household.income[12K-16K]     -0.1953279   0.5895983  -0.331  0.7405
## household.income[16K-25K]     -0.6022378   0.5082887  -1.185  0.2362
## household.income[25K-35K]     -0.0412148   0.4767757  -0.086  0.9311
## household.income[35K-50K]     -0.4586758   0.4638686  -0.989  0.3229
## household.income[50K-75K]     -0.3492380   0.4556672  -0.766  0.4435
## household.income[5K-12K]      -0.1950754   0.5241195  -0.372  0.7098
## household.income[75K-100K]    -0.4164295   0.4621374  -0.901  0.3676
## high.educBachelor           0.1977527   0.4281320   0.462  0.6442
## high.educHS Diploma/GED       0.1323975   0.4297721   0.308  0.7581
## high.educPost Graduate Degree   0.6574649   0.4361054   1.508  0.1318
## high.educSome College         0.4952835   0.3994622   1.240  0.2152
## demo_race_hispanic1          0.0680369   0.2042909   0.333  0.7391
## ---
## Signif. codes:  0 '***' 0.001 '**' 0.01 '*' 0.05 '.' 0.1 ' ' 1
##
##
## R-sq.(adj) =  0.0129
## lmer.REML = 11083 Scale est. = 6.8399    n = 2194

##
##           stdcoef      stdse
## X(Intercept)      0.00000000 0.00000000
## Xhormone_scr_ert_mean      0.002544361 0.02268111
## Xhormone_sal_end_min_since_midnight  0.018894731 0.02289430
## Xrace.ethnicity.5levelBlack      -0.015755433 0.05289830
```

```

## Xrace.ethnicity.5levelMixed      0.090292208 0.04828670
## Xrace.ethnicity.5levelOther      0.007042411 0.03643351
## Xrace.ethnicity.5levelWhite      0.112573733 0.06475705
## Xinterview_age                   0.047157898 0.02201015
## Xbmi                             0.007461794 0.02266703
## Xhousehold.income[>=200K]       -0.113167934 0.05070338
## Xhousehold.income[100K-200K]    -0.090693462 0.07004389
## Xhousehold.income[12K-16K]      -0.009476260 0.02860413
## Xhousehold.income[16K-25K]      -0.039216878 0.03309905
## Xhousehold.income[25K-35K]      -0.003274100 0.03787498
## Xhousehold.income[35K-50K]      -0.042853902 0.04333906
## Xhousehold.income[50K-75K]      -0.039172057 0.05110961
## Xhousehold.income[5K-12K]       -0.011562380 0.03106526
## Xhousehold.income[75K-100K]     -0.049297314 0.05470826
## Xhigh.educBachelor               0.028849384 0.06245854
## Xhigh.educHS Diploma/GED        0.011715124 0.03802816
## Xhigh.educPost Graduate Degree   0.104249874 0.06915036
## Xhigh.educSome College           0.069913836 0.05638778
## Xdemo_race_hispanic1             0.008624754 0.02589710

```

### Male participants

```

##
## Family: gaussian
## Link function: identity
##
## Formula:
## cbcl_scr_syn_anxdep_r ~ hormone_scr_ert_mean + hormone_sal_end_min_since_midnight +
##   race.ethnicity.5level + interview_age + bmi + household.income +
##   high.educ + demo_race_hispanic
##
## Parametric coefficients:
##
##           Estimate Std. Error t value Pr(>|t|)
## (Intercept)      2.7460088   1.2664351   2.168  0.03024 *
## hormone_scr_ert_mean      0.0034859   0.0044200   0.789  0.43039
## hormone_sal_end_min_since_midnight      0.0002436   0.0003841   0.634  0.52604
## race.ethnicity.5levelBlack      -0.1414372   0.5039069  -0.281  0.77898
## race.ethnicity.5levelMixed       0.4806227   0.4926632   0.976  0.32938
## race.ethnicity.5levelOther       0.2618683   0.5607106   0.467  0.64052
## race.ethnicity.5levelWhite       0.6198641   0.4636818   1.337  0.18141
## interview_age      -0.0078450   0.0084611  -0.927  0.35392
## bmi                 0.0016722   0.0175439   0.095  0.92407
## household.income[>=200K]      -1.3511839   0.4766146  -2.835  0.00462 **
## household.income[100K-200K]    -1.0675358   0.4462099  -2.392  0.01681 *
## household.income[12K-16K]       0.0284430   0.5779694   0.049  0.96075
## household.income[16K-25K]      -0.2406261   0.4797897  -0.502  0.61605
## household.income[25K-35K]      -0.3568352   0.4791715  -0.745  0.45653
## household.income[35K-50K]      -0.4482888   0.4550330  -0.985  0.32464
## household.income[50K-75K]      -0.8537161   0.4420421  -1.931  0.05357 .
## household.income[5K-12K]       -0.0012877   0.4960201  -0.003  0.99793
## household.income[75K-100K]     -1.0507535   0.4547320  -2.311  0.02093 *
## high.educBachelor              1.0870212   0.4470939   2.431  0.01512 *
## high.educHS Diploma/GED       -0.0829352   0.4438869  -0.187  0.85180

```



```

## high.educPost Graduate Degree      0.7419754  0.4496310  1.650  0.09904 .
## high.educSome College              0.6922998  0.4257763  1.626  0.10409
## demo_race_hispanic1                0.0974709  0.2003854  0.486  0.62672
## ---
## Signif. codes:  0 '***' 0.001 '**' 0.01 '*' 0.05 '.' 0.1 ' ' 1
##
##
## R-sq.(adj) =  0.0136
## lmer.REML = 12078  Scale est. = 6.4672    n = 2379

##                                stdcoef      stdse
## X(Intercept)                   0.000000e+00 0.00000000
## Xhormone_scr_ert_mean            1.686789e-02 0.02138790
## Xhormone_sal_end_min_since_midnight 1.418051e-02 0.02236112
## Xrace.ethnicity.5levelBlack      -1.481686e-02 0.05278892
## Xrace.ethnicity.5levelMixed       5.103982e-02 0.05231846
## Xrace.ethnicity.5levelOther       1.800339e-02 0.03854874
## Xrace.ethnicity.5levelWhite       9.275532e-02 0.06938449
## Xinterview_age                   -1.930878e-02 0.02082506
## Xbmi                              2.048620e-03 0.02149363
## Xhousehold.income[>=200K]        -1.449672e-01 0.05113550
## Xhousehold.income[100K-200K]     -1.612819e-01 0.06741278
## Xhousehold.income[12K-16K]        1.311258e-03 0.02664510
## Xhousehold.income[16K-25K]       -1.618733e-02 0.03227629
## Xhousehold.income[25K-35K]       -2.564640e-02 0.03443893
## Xhousehold.income[35K-50K]       -4.010098e-02 0.04070427
## Xhousehold.income[50K-75K]       -9.686457e-02 0.05015510
## Xhousehold.income[5K-12K]        -7.713877e-05 0.02971439
## Xhousehold.income[75K-100K]      -1.216635e-01 0.05265202
## Xhigh.educBachelor                1.558402e-01 0.06409739
## Xhigh.educHS Diploma/GED         -7.137211e-03 0.03819988
## Xhigh.educPost Graduate Degree    1.165907e-01 0.07065302
## Xhigh.educSome College            9.785551e-02 0.06018282
## Xdemo_race_hispanic1              1.244285e-02 0.02558061

```

## 1.11 Model: CBCL Withdrawn-Depressed ~ Testosterone

### Female participants

```

##
## Family: gaussian
## Link function: identity
##
## Formula:
## cbcl_scr_syn_withdep_r ~ hormone_scr_ert_mean + hormone_sal_end_min_since_midnight +
##   race.ethnicity.5level + interview_age + bmi + household.income +
##   high.educ + demo_race_hispanic
##
## Parametric coefficients:
##                                Estimate Std. Error t value Pr(>|t|)
## (Intercept)                   2.037e-01  6.726e-01   0.303  0.76200
## hormone_scr_ert_mean           4.124e-03  2.189e-03   1.884  0.05974 .
## hormone_sal_end_min_since_midnight -7.106e-05  2.069e-04  -0.343  0.73136

```

```

## race.ethnicity.5levelBlack      -4.212e-01  2.384e-01  -1.766  0.07745 .
## race.ethnicity.5levelMixed      -8.803e-04  2.326e-01  -0.004  0.99698
## race.ethnicity.5levelOther      -3.356e-01  2.745e-01  -1.222  0.22169
## race.ethnicity.5levelWhite      -2.897e-02  2.163e-01  -0.134  0.89345
## interview_age                    6.707e-03  4.685e-03   1.432  0.15241
## bmi                              1.811e-02  9.463e-03   1.914  0.05579 .
## household.income[>=200K]        -9.507e-01  2.543e-01  -3.738  0.00019 ***
## household.income[100K-200K]     -7.053e-01  2.359e-01  -2.990  0.00282 **
## household.income[12K-16K]       -4.337e-01  3.047e-01  -1.423  0.15477
## household.income[16K-25K]       -3.490e-01  2.637e-01  -1.324  0.18571
## household.income[25K-35K]       -1.819e-01  2.468e-01  -0.737  0.46114
## household.income[35K-50K]       -6.173e-01  2.402e-01  -2.570  0.01024 *
## household.income[50K-75K]       -5.894e-01  2.358e-01  -2.500  0.01251 *
## household.income[5K-12K]        -1.436e-01  2.721e-01  -0.528  0.59789
## household.income[75K-100K]      -6.301e-01  2.392e-01  -2.634  0.00850 **
## high.educBachelor                1.357e-01  2.215e-01   0.613  0.54025
## high.educHS Diploma/GED         4.185e-01  2.228e-01   1.878  0.06050 .
## high.educPost Graduate Degree    1.955e-01  2.257e-01   0.866  0.38656
## high.educSome College            2.308e-01  2.068e-01   1.116  0.26454
## demo_race_hispanic1             -1.692e-02  1.058e-01  -0.160  0.87297
## ---
## Signif. codes:  0 '***' 0.001 '**' 0.01 '*' 0.05 '.' 0.1 ' ' 1
##
##
## R-sq.(adj) =  0.0203
## lmer.REML = 8259.1  Scale est. = 2.2518    n = 2194

##
##                stdcoef      stdse
## X(Intercept)          0.000000000  0.00000000
## Xhormone_scr_ert_mean  0.0426125573  0.02262163
## Xhormone_sal_end_min_since_midnight -0.0078483593  0.02285727
## Xrace.ethnicity.5levelBlack -0.0928636637  0.05256935
## Xrace.ethnicity.5levelMixed -0.0001815482  0.04796267
## Xrace.ethnicity.5levelOther -0.0442201714  0.03617525
## Xrace.ethnicity.5levelWhite -0.0086210624  0.06436019
## Xinterview_age        0.0315024732  0.02200576
## Xbmi                  0.0431546353  0.02255065
## Xhousehold.income[>=200K] -0.1879280523  0.05027772
## Xhousehold.income[100K-200K] -0.2075481173  0.06942079
## Xhousehold.income[12K-16K] -0.0402907825  0.02830635
## Xhousehold.income[16K-25K] -0.0435275174  0.03288109
## Xhousehold.income[25K-35K] -0.0276722498  0.03754205
## Xhousehold.income[35K-50K] -0.1104534839  0.04298250
## Xhousehold.income[50K-75K] -0.1265947324  0.05064665
## Xhousehold.income[5K-12K] -0.0162952613  0.03089090
## Xhousehold.income[75K-100K] -0.1428499416  0.05423376
## Xhigh.educBachelor      0.0379140424  0.06189705
## Xhigh.educHS Diploma/GED 0.0709092319  0.03775538
## Xhigh.educPost Graduate Degree 0.0593634032  0.06854558
## Xhigh.educSome College  0.0623960102  0.05591010
## Xdemo_race_hispanic1   -0.0041073352  0.02568594

```

## Male participants

```
##
## Family: gaussian
## Link function: identity
##
## Formula:
## cbcl_scr_syn_withdep_r ~ hormone_scr_ert_mean + hormone_sal_end_min_since_midnight +
##   race.ethnicity.5level + interview_age + bmi + household.income +
##   high.educ + demo_race_hispanic
##
## Parametric coefficients:
##
##           Estimate Std. Error t value Pr(>|t|)
## (Intercept)      0.1749096   0.7338713   0.238  0.81164
## hormone_scr_ert_mean      0.0033801   0.0025531   1.324  0.18566
## hormone_sal_end_min_since_midnight  0.0004992   0.0002147   2.325  0.02015 *
## race.ethnicity.5levelBlack -0.1281806   0.2924864  -0.438  0.66125
## race.ethnicity.5levelMixed  0.2745361   0.2863845   0.959  0.33784
## race.ethnicity.5levelOther  0.0361823   0.3261409   0.111  0.91167
## race.ethnicity.5levelWhite  0.1320389   0.2689971   0.491  0.62357
## interview_age          0.0115222   0.0049116   2.346  0.01906 *
## bmi                   -0.0013690   0.0102158  -0.134  0.89341
## household.income[>=200K] -1.1162297   0.2768150  -4.032  5.7e-05 ***
## household.income[100K-200K] -0.9606560   0.2595893  -3.701  0.00022 ***
## household.income[12K-16K]  -0.0032637   0.3371566  -0.010  0.99228
## household.income[16K-25K]  -0.0013884   0.2795849  -0.005  0.99604
## household.income[25K-35K]  -0.3089656   0.2792356  -1.106  0.26864
## household.income[35K-50K]  -0.5523921   0.2653105  -2.082  0.03744 *
## household.income[50K-75K]  -0.7146659   0.2574872  -2.776  0.00555 **
## household.income[5K-12K]   -0.0756580   0.2894550  -0.261  0.79382
## household.income[75K-100K] -1.0099203   0.2648045  -3.814  0.00014 ***
## high.educBachelor        -0.0515743   0.2599490  -0.198  0.84275
## high.educHS Diploma/GED  -0.5481762   0.2580618  -2.124  0.03376 *
## high.educPost Graduate Degree -0.3230344   0.2615604  -1.235  0.21694
## high.educSome College    -0.1263173   0.2473801  -0.511  0.60966
## demo_race_hispanic1     -0.1453466   0.1122593  -1.295  0.19554
## ---
## Signif. codes:  0 '***' 0.001 '**' 0.01 '*' 0.05 '.' 0.1 ' ' 1
##
##
## R-sq.(adj) =  0.0387
## lmer.REML = 9527.1  Scale est. = 2.0837    n = 2379

##
##           stdcoef      stdse
## X(Intercept)      0.000000000  0.00000000
## Xhormone_scr_ert_mean      0.0277994013  0.02099776
## Xhormone_sal_end_min_since_midnight  0.0493908784  0.02124256
## Xrace.ethnicity.5levelBlack -0.0228230359  0.05207828
## Xrace.ethnicity.5levelMixed  0.0495521802  0.05169074
## Xrace.ethnicity.5levelOther  0.0042279077  0.03810966
## Xrace.ethnicity.5levelWhite  0.0335817038  0.06841454
## Xinterview_age      0.0482005379  0.02054664
## Xbmi                 -0.0028506779  0.02127237
## Xhousehold.income[>=200K] -0.2035481777  0.05047813
```

```

## Xhousehold.income[100K-200K]      -0.2466774492  0.06665741
## Xhousehold.income[12K-16K]       -0.0002557279  0.02641817
## Xhousehold.income[16K-25K]       -0.0001587499  0.03196721
## Xhousehold.income[25K-35K]       -0.0377422046  0.03411049
## Xhousehold.income[35K-50K]       -0.0839852427  0.04033760
## Xhousehold.income[50K-75K]       -0.1378202513  0.04965530
## Xhousehold.income[5K-12K]        -0.0077033702  0.02947183
## Xhousehold.income[75K-100K]      -0.1987490622  0.05211267
## Xhigh.educBachelor                -0.0125670491  0.06334148
## Xhigh.educHS Diploma/GED         -0.0801804357  0.03774608
## Xhigh.educPost Graduate Degree    -0.0862743701  0.06985620
## Xhigh.educSome College            -0.0303467608  0.05943118
## Xdemo_race_hispanic1              -0.0315361096  0.02435710

```

## 1.12 Model: CBCL Depressed DSM-5 ~ Testosterone

### Female participants

```

##
## Family: gaussian
## Link function: identity
##
## Formula:
## cbcl_scr_dsm5_depress_r ~ hormone_scr_ert_mean + hormone_sal_end_min_since_midnight +
##   race.ethnicity.5level + interview_age + bmi + household.income +
##   high.educ + demo_race_hispanic
##
## Parametric coefficients:
##
##               Estimate Std. Error t value Pr(>|t|)
## (Intercept)      0.5448231  0.7855508   0.694  0.48804
## hormone_scr_ert_mean  0.0002492  0.0025575   0.097  0.92238
## hormone_sal_end_min_since_midnight  0.0001340  0.0002405   0.557  0.57748
## race.ethnicity.5levelBlack -0.1485679  0.2793271  -0.532  0.59487
## race.ethnicity.5levelMixed  0.2228049  0.2728009   0.817  0.41417
## race.ethnicity.5levelOther -0.2463580  0.3222510  -0.764  0.44466
## race.ethnicity.5levelWhite  0.2689667  0.2533752   1.062  0.28856
## interview_age      0.0050960  0.0054599   0.933  0.35074
## bmi                0.0136328  0.0110909   1.229  0.21914
## household.income[>=200K]    -0.8399652  0.2990620  -2.809  0.00502 **
## household.income[100K-200K] -0.6906508  0.2775604  -2.488  0.01291 *
## household.income[12K-16K]  -0.1248396  0.3590775  -0.348  0.72812
## household.income[16K-25K]  -0.4488379  0.3095188  -1.450  0.14717
## household.income[25K-35K]  -0.1706572  0.2903564  -0.588  0.55676
## household.income[35K-50K]  -0.4208837  0.2824487  -1.490  0.13634
## household.income[50K-75K]  -0.5418391  0.2774752  -1.953  0.05098 .
## household.income[5K-12K]   -0.0400520  0.3191595  -0.125  0.90015
## household.income[75K-100K] -0.5672067  0.2814055  -2.016  0.04396 *
## high.educBachelor        -0.1290761  0.2607057  -0.495  0.62058
## high.educHS Diploma/GED  -0.0003630  0.2616818  -0.001  0.99889
## high.educPost Graduate Degree  0.0669397  0.2655463   0.252  0.80100
## high.educSome College     0.0006746  0.2432671   0.003  0.99779
## demo_race_hispanic1      -0.0492478  0.1239892  -0.397  0.69126
## ---

```

```

## Signif. codes:  0 '***' 0.001 '**' 0.01 '*' 0.05 '.' 0.1 ' ' 1
##
##
## R-sq.(adj) =  0.0086
## lmer.REML =  8927  Scale est. = 2.504    n = 2194

##                stdcoef      stdse
## X(Intercept)      0.000000e+00 0.00000000
## Xhormone_scr_ert_mean      2.220109e-03 0.02278263
## Xhormone_sal_end_min_since_midnight  1.276038e-02 0.02290299
## Xrace.ethnicity.5levelBlack      -2.824060e-02 0.05309604
## Xrace.ethnicity.5levelMixed      3.961381e-02 0.04850289
## Xrace.ethnicity.5levelOther      -2.798609e-02 0.03660749
## Xrace.ethnicity.5levelWhite      6.900126e-02 0.06500139
## Xinterview_age      2.063498e-02 0.02210842
## Xbmi      2.800840e-02 0.02278620
## Xhousehold.income[>=200K]      -1.431541e-01 0.05096874
## Xhousehold.income[100K-200K]      -1.752243e-01 0.07041955
## Xhousehold.income[12K-16K]      -9.999869e-03 0.02876274
## Xhousehold.income[16K-25K]      -4.825741e-02 0.03327833
## Xhousehold.income[25K-35K]      -2.238373e-02 0.03808370
## Xhousehold.income[35K-50K]      -6.492563e-02 0.04357061
## Xhousehold.income[50K-75K]      -1.003447e-01 0.05138643
## Xhousehold.income[5K-12K]      -3.919572e-03 0.03123359
## Xhousehold.income[75K-100K]      -1.108645e-01 0.05500268
## Xhigh.educBachelor      -3.109061e-02 0.06279630
## Xhigh.educHS Diploma/GED      -5.303778e-05 0.03823051
## Xhigh.educPost Graduate Degree      1.752493e-02 0.06952047
## Xhigh.educSome College      1.572348e-04 0.05669726
## Xdemo_race_hispanic1      -1.030762e-02 0.02595108

```

## Male participants

```

##
## Family: gaussian
## Link function: identity
##
## Formula:
## cbcl_scr_dsm5_depress_r ~ hormone_scr_ert_mean + hormone_sal_end_min_since_midnight +
##   race.ethnicity.5level + interview_age + bmi + household.income +
##   high.educ + demo_race_hispanic
##
## Parametric coefficients:
##                Estimate Std. Error t value Pr(>|t|)
## (Intercept)      1.1583182  0.8551288   1.355 0.175690
## hormone_scr_ert_mean      0.0024320  0.0029842   0.815 0.415169
## hormone_sal_end_min_since_midnight  0.0004051  0.0002578   1.572 0.116179
## race.ethnicity.5levelBlack      -0.1207041  0.3411796  -0.354 0.723532
## race.ethnicity.5levelMixed      0.2177851  0.3337039   0.653 0.514059
## race.ethnicity.5levelOther      0.0377379  0.3792899   0.099 0.920753
## race.ethnicity.5levelWhite      0.1807367  0.3138576   0.576 0.564768
## interview_age      0.0051344  0.0057044   0.900 0.368177
## bmi      -0.0038901  0.0118563  -0.328 0.742863

```

```

## household.income[>=200K]          -1.2088173  0.3231958  -3.740  0.000188 ***
## household.income[100K-200K]       -1.1857935  0.3025695  -3.919  9.14e-05 ***
## household.income[12K-16K]         0.0721747  0.3923152   0.184  0.854052
## household.income[16K-25K]        -0.4517416  0.3252506  -1.389  0.164994
## household.income[25K-35K]        -0.6500384  0.3249181  -2.001  0.045548 *
## household.income[35K-50K]        -0.8092992  0.3087068  -2.622  0.008809 **
## household.income[50K-75K]        -0.8795666  0.2997802  -2.934  0.003378 **
## household.income[5K-12K]         -0.2344764  0.3365730  -0.697  0.486085
## household.income[75K-100K]       -1.0339160  0.3084391  -3.352  0.000815 ***
## high.educBachelor                 0.2846554  0.3031104   0.939  0.347768
## high.educHS Diploma/GED         -0.3710171  0.3008409  -1.233  0.217599
## high.educPost Graduate Degree    -0.0389068  0.3048837  -0.128  0.898467
## high.educSome College            0.2798248  0.2885268   0.970  0.332226
## demo_race_hispanic1             -0.1252888  0.1349469  -0.928  0.353280
## ---
## Signif. codes:  0 '***' 0.001 '**' 0.01 '*' 0.05 '.' 0.1 ' ' 1
##
##
## R-sq.(adj) =  0.025
## lmer.REML = 10227  Scale est. = 2.4284  n = 2379

##
##          stdcoef      stdse
## X(Intercept)          0.00000000  0.00000000
## Xhormone_scr_ert_mean  0.017307166  0.02123644
## Xhormone_sal_end_min_since_midnight  0.034684002  0.02206929
## Xrace.ethnicity.5levelBlack -0.018596333  0.05256400
## Xrace.ethnicity.5levelMixed  0.034013066  0.05211695
## Xrace.ethnicity.5levelOther  0.003815594  0.03834913
## Xrace.ethnicity.5levelWhite  0.039774209  0.06906974
## Xinterview_age        0.018584945  0.02064840
## Xbmi                  -0.007009014  0.02136224
## Xhousehold.income[>=200K] -0.190734274  0.05099572
## Xhousehold.income[100K-200K] -0.263466270  0.06722660
## Xhousehold.income[12K-16K]  0.004893395  0.02659871
## Xhousehold.income[16K-25K] -0.044692595  0.03217834
## Xhousehold.income[25K-35K] -0.068708523  0.03434357
## Xhousehold.income[35K-50K] -0.106467989  0.04061216
## Xhousehold.income[50K-75K] -0.146768596  0.05002272
## Xhousehold.income[5K-12K]  -0.020657584  0.02965239
## Xhousehold.income[75K-100K] -0.176058769  0.05252206
## Xhigh.educBachelor       0.060016941  0.06390801
## Xhigh.educHS Diploma/GED -0.046956582  0.03807497
## Xhigh.educPost Graduate Degree -0.008991100  0.07045658
## Xhigh.educSome College   0.058168802  0.05997774
## Xdemo_race_hispanic1    -0.023521770  0.02533499

```

### 1.13 Model: CBCL internalizing factor ~ Testosterone + PDS

#### Female participants

```

##
## Family: gaussian
## Link function: identity

```

```

##
## Formula:
## cbcl_scr_syn_internal_r ~ hormone_scr_ert_mean + hormone_sal_end_min_since_midnight +
##   PDS_score + race.ethnicity.5level + interview_age + bmi +
##   household.income + high.educ + demo_race_hispanic
##
## Parametric coefficients:
##
##           Estimate Std. Error t value Pr(>|t|)
## (Intercept)      -1.0235183   2.2937529  -0.446 0.655483
## hormone_scr_ert_mean      -0.0039075   0.0075274  -0.519 0.603738
## hormone_sal_end_min_since_midnight  0.0003904   0.0007025   0.556 0.578475
## PDS_score           0.6968211   0.1813164   3.843 0.000125 ***
## race.ethnicity.5levelBlack      -0.8738375   0.8173791  -1.069 0.285156
## race.ethnicity.5levelMixed       1.0856218   0.7939893   1.367 0.171673
## race.ethnicity.5levelOther      -0.3238110   0.9364448  -0.346 0.729536
## race.ethnicity.5levelWhite       1.1398878   0.7379822   1.545 0.122589
## interview_age           0.0293430   0.0162433   1.806 0.070984 .
## bmi                   0.0418235   0.0325327   1.286 0.198726
## household.income[>=200K]      -2.7947142   0.8702052  -3.212 0.001339 **
## household.income[100K-200K]    -1.9360962   0.8074842  -2.398 0.016583 *
## household.income[12K-16K]     -0.5222649   1.0454545  -0.500 0.617437
## household.income[16K-25K]     -1.3051584   0.8981967  -1.453 0.146344
## household.income[25K-35K]     -0.4354260   0.8439344  -0.516 0.605943
## household.income[35K-50K]     -1.4569271   0.8208460  -1.775 0.076053 .
## household.income[50K-75K]     -1.4951269   0.8065764  -1.854 0.063922 .
## household.income[5K-12K]      -0.4912888   0.9246786  -0.531 0.595260
## household.income[75K-100K]    -1.5973797   0.8185850  -1.951 0.051139 .
## high.educBachelor           1.0797204   0.7577160   1.425 0.154310
## high.educHS Diploma/GED       1.0730662   0.7599078   1.412 0.158064
## high.educPost Graduate Degree   1.5024283   0.7717551   1.947 0.051691 .
## high.educSome College         1.3854747   0.7072093   1.959 0.050232 .
## demo_race_hispanic1          -0.0519846   0.3630728  -0.143 0.886162
## ---
## Signif. codes:  0 '***' 0.001 '**' 0.01 '*' 0.05 '.' 0.1 ' ' 1
##
##
## R-sq.(adj) =  0.0237
## lmer.REML = 13534  Scale est. = 17.697    n = 2194

##
##           stdcoef      stdse
## X(Intercept)           0.00000000 0.00000000
## Xhormone_scr_ert_mean  -0.011886357 0.02289762
## Xhormone_sal_end_min_since_midnight  0.012693788 0.02284296
## XPDS_score             0.092402199 0.02404352
## Xrace.ethnicity.5levelBlack      -0.056721329 0.05305658
## Xrace.ethnicity.5levelMixed       0.065912398 0.04820623
## Xrace.ethnicity.5levelOther      -0.012561281 0.03632658
## Xrace.ethnicity.5levelWhite       0.099859014 0.06465038
## Xinterview_age           0.040573429 0.02246012
## Xbmi                     0.029342108 0.02282400
## Xhousehold.income[>=200K]      -0.162647224 0.05064434
## Xhousehold.income[100K-200K]    -0.167737187 0.06995785
## Xhousehold.income[12K-16K]     -0.014285635 0.02859656
## Xhousehold.income[16K-25K]     -0.047918631 0.03297711

```

```

## Xhousehold.income[25K-35K] -0.019502435 0.03779925
## Xhousehold.income[35K-50K] -0.076746496 0.04323968
## Xhousehold.income[50K-75K] -0.094551639 0.05100779
## Xhousehold.income[5K-12K] -0.016417904 0.03090094
## Xhousehold.income[75K-100K] -0.106616916 0.05463636
## Xhigh.educBachelor 0.088809939 0.06232420
## Xhigh.educHS Diploma/GED 0.053534007 0.03791091
## Xhigh.educPost Graduate Degree 0.134317593 0.06899517
## Xhigh.educSome College 0.110266615 0.05628510
## Xdemo_race_hispanic1 -0.003715466 0.02594968

```

### Male participants

```

##
## Family: gaussian
## Link function: identity
##
## Formula:
## cbcl_scr_syn_internal_r ~ hormone_scr_ert_mean + hormone_sal_end_min_since_midnight +
##   PDS_score + race.ethnicity.5level + interview_age + bmi +
##   household.income + high.educ + demo_race_hispanic
##
## Parametric coefficients:
##               Estimate Std. Error t value Pr(>|t|)
## (Intercept)    3.4437338   2.2451820   1.534 0.125205
## hormone_scr_ert_mean 0.0028842   0.0078665   0.367 0.713921
## hormone_sal_end_min_since_midnight 0.0011284   0.0006811   1.657 0.097734 .
## PDS_score      0.5969949   0.2241720   2.663 0.007795 **
## race.ethnicity.5levelBlack -0.6231398   0.8990641  -0.693 0.488316
## race.ethnicity.5levelMixed  1.0254737   0.8762589   1.170 0.242004
## race.ethnicity.5levelOther  0.1110435   0.9953849   0.112 0.911183
## race.ethnicity.5levelWhite  0.9668760   0.8243843   1.173 0.240976
## interview_age  0.0021672   0.0150709   0.144 0.885668
## bmi            0.0185812   0.0313908   0.592 0.553952
## household.income[>=200K] -3.1057810   0.8524625  -3.643 0.000275 ***
## household.income[100K-200K] -2.5616659   0.7979366  -3.210 0.001344 **
## household.income[12K-16K] -0.1753376   1.0306145  -0.170 0.864923
## household.income[16K-25K] -0.1202592   0.8563328  -0.140 0.888328
## household.income[25K-35K] -0.7302804   0.8564065  -0.853 0.393898
## household.income[35K-50K] -1.2525154   0.8134669  -1.540 0.123762
## household.income[50K-75K] -1.7627043   0.7891305  -2.234 0.025594 *
## household.income[5K-12K] -0.2073932   0.8835927  -0.235 0.814450
## household.income[75K-100K] -2.6771949   0.8131444  -3.292 0.001008 **
## high.educBachelor  1.1555065   0.7968814   1.450 0.147182
## high.educHS Diploma/GED -0.8403741   0.7910065  -1.062 0.288158
## high.educPost Graduate Degree  0.3738810   0.8013958   0.467 0.640874
## high.educSome College  0.7371071   0.7592100   0.971 0.331704
## demo_race_hispanic1 -0.0532883   0.3568215  -0.149 0.881297
## ---
## Signif. codes:  0 '***' 0.001 '**' 0.01 '*' 0.05 '.' 0.1 ' ' 1
##
##
## R-sq.(adj) = 0.0319

```



```

## lmer.REML = 14771  Scale est. = 15.906    n = 2379

##                stdcoef      stdse
## X(Intercept)      0.00000000 0.00000000
## Xhormone_scr_ert_mean      0.007764948 0.02117874
## Xhormone_sal_end_min_since_midnight 0.036550456 0.02206353
## XPDS_score      0.057753978 0.02168666
## Xrace.ethnicity.5levelBlack      -0.036320913 0.05240370
## Xrace.ethnicity.5levelMixed      0.060590997 0.05177452
## Xrace.ethnicity.5levelOther      0.004247596 0.03807511
## Xrace.ethnicity.5levelWhite      0.080499263 0.06863582
## Xinterview_age      0.002967877 0.02063842
## Xbmi      0.012665912 0.02139756
## Xhousehold.income[>=200K]      -0.185397889 0.05088728
## Xhousehold.income[100K-200K]      -0.215329901 0.06707339
## Xhousehold.income[12K-16K]      -0.004497450 0.02643551
## Xhousehold.income[16K-25K]      -0.004501215 0.03205192
## Xhousehold.income[25K-35K]      -0.029202978 0.03424660
## Xhousehold.income[35K-50K]      -0.062338871 0.04048701
## Xhousehold.income[50K-75K]      -0.111278113 0.04981718
## Xhousehold.income[5K-12K]      -0.006912592 0.02945089
## Xhousehold.income[75K-100K]      -0.172471880 0.05238488
## Xhigh.educBachelor      0.092170673 0.06356442
## Xhigh.educHS Diploma/GED      -0.040238440 0.03787465
## Xhigh.educPost Graduate Degree      0.032687877 0.07006487
## Xhigh.educSome College      0.057969620 0.05970790
## Xdemo_race_hispanic1      -0.003784907 0.02534397

```

## 1.14 Model: CBCL internalizing factor ~ Testosterone + Pubertal category

### Female participants

```

##
## Family: gaussian
## Link function: identity
##
## Formula:
## cbcl_scr_syn_internal_r ~ hormone_scr_ert_mean + hormone_sal_end_min_since_midnight +
##   pds_p_ss_category + race.ethnicity.5level + interview_age +
##   bmi + household.income + high.educ + demo_race_hispanic
##
## Parametric coefficients:
##                Estimate Std. Error t value Pr(>|t|)
## (Intercept)      -0.4791156   2.3737499  -0.202  0.84006
## hormone_scr_ert_mean      -0.0018296   0.0075063  -0.244  0.80745
## hormone_sal_end_min_since_midnight 0.0003195   0.0007049   0.453  0.65037
## pds_p_ss_categoryEarly      0.3199518   0.3157908   1.013  0.31109
## pds_p_ss_categoryLate      0.7413169   0.8198696   0.904  0.36600
## pds_p_ss_categoryMid      0.8521830   0.3109844   2.740  0.00619 **
## race.ethnicity.5levelBlack      -0.7575458   0.8179247  -0.926  0.35446
## race.ethnicity.5levelMixed      1.1289051   0.7953866   1.419  0.15595
## race.ethnicity.5levelOther      -0.2785297   0.9380016  -0.297  0.76654
## race.ethnicity.5levelWhite      1.1648902   0.7392110   1.576  0.11520

```

```

## interview_age          0.0314119  0.0166281  1.889  0.05901 .
## bmi                    0.0361033  0.0337279  1.070  0.28455
## household.income[>=200K] -2.8229835  0.8727427 -3.235  0.00124 **
## household.income[100K-200K] -1.9541412  0.8100575 -2.412  0.01593 *
## household.income[12K-16K] -0.6780736  1.0467838 -0.648  0.51720
## household.income[16K-25K] -1.3046423  0.9003999 -1.449  0.14749
## household.income[25K-35K] -0.5202213  0.8459213 -0.615  0.53864
## household.income[35K-50K] -1.5206784  0.8221872 -1.850  0.06451 .
## household.income[50K-75K] -1.5254036  0.8084430 -1.887  0.05932 .
## household.income[5K-12K] -0.5169751  0.9266703 -0.558  0.57698
## household.income[75K-100K] -1.6452994  0.8204060 -2.005  0.04504 *
## high.educBachelor       1.0535667  0.7602749  1.386  0.16596
## high.educHS Diploma/GED  1.0940361  0.7613975  1.437  0.15090
## high.educPost Graduate Degree  1.4814336  0.7745445  1.913  0.05592 .
## high.educSome College   1.4376086  0.7093335  2.027  0.04281 *
## demo_race_hispanic1    -0.1029159  0.3635832 -0.283  0.77716
## ---
## Signif. codes:  0 '***' 0.001 '**' 0.01 '*' 0.05 '.' 0.1 ' ' 1
##
##
## R-sq.(adj) =  0.0204
## lmer.REML = 13540  Scale est. = 17.955  n = 2194

##
##          stdcoef      stdse
## X(Intercept)          0.00000000  0.00000000
## Xhormone_scr_ert_mean -0.005565492  0.02283364
## Xhormone_sal_end_min_since_midnight  0.010389833  0.02292002
## Xpds_p_ss_categoryEarly  0.025202782  0.02487502
## Xpds_p_ss_categoryLate  0.020677457  0.02286852
## Xpds_p_ss_categoryMid  0.077669759  0.02834378
## Xrace.ethnicity.5levelBlack -0.049172764  0.05309199
## Xrace.ethnicity.5levelMixed  0.068540298  0.04829107
## Xrace.ethnicity.5levelOther -0.010804729  0.03638697
## Xrace.ethnicity.5levelWhite  0.102049329  0.06475802
## Xinterview_age        0.043434253  0.02299212
## Xbmi                   0.025329038  0.02366251
## Xhousehold.income[>=200K] -0.164292446  0.05079202
## Xhousehold.income[100K-200K] -0.169300541  0.07018079
## Xhousehold.income[12K-16K] -0.018547508  0.02863293
## Xhousehold.income[16K-25K] -0.047899680  0.03305800
## Xhousehold.income[25K-35K] -0.023300360  0.03788824
## Xhousehold.income[35K-50K] -0.080104722  0.04331032
## Xhousehold.income[50K-75K] -0.096466329  0.05112584
## Xhousehold.income[5K-12K] -0.017276288  0.03096750
## Xhousehold.income[75K-100K] -0.109815308  0.05475790
## Xhigh.educBachelor     0.086658727  0.06253468
## Xhigh.educHS Diploma/GED  0.054580174  0.03798523
## Xhigh.educPost Graduate Degree  0.132440660  0.06924454
## Xhigh.educSome College  0.114415826  0.05645416
## Xdemo_race_hispanic1  -0.007355643  0.02598615

```

## Male participants

```
##
```

```

## Family: gaussian
## Link function: identity
##
## Formula:
## cbcl_scr_syn_internal_r ~ hormone_scr_ert_mean + hormone_sal_end_min_since_midnight +
##   pds_p_ss_category + race.ethnicity.5level + interview_age +
##   bmi + household.income + high.educ + demo_race_hispanic
##
## Parametric coefficients:
##
##           Estimate Std. Error t value Pr(>|t|)
## (Intercept)      3.6689461   2.2514873   1.630 0.103327
## hormone_scr_ert_mean      0.0037245   0.0078567   0.474 0.635504
## hormone_sal_end_min_since_midnight      0.0011237   0.0006818   1.648 0.099446 .
## pds_p_ss_categoryEarly      0.4012560   0.2801908   1.432 0.152253
## pds_p_ss_categoryLate      1.5054973   1.9555287   0.770 0.441456
## pds_p_ss_categoryMid      1.1642074   0.5326569   2.186 0.028939 *
## race.ethnicity.5levelBlack      -0.5701081   0.8988333  -0.634 0.525963
## race.ethnicity.5levelMixed      1.0879670   0.8773825   1.240 0.215094
## race.ethnicity.5levelOther      0.1394460   0.9965038   0.140 0.888723
## race.ethnicity.5levelWhite      1.0481425   0.8257990   1.269 0.204479
## interview_age      0.0039505   0.0150401   0.263 0.792834
## bmi      0.0221825   0.0313074   0.709 0.478681
## household.income[>=200K]      -3.1120643   0.8542964  -3.643 0.000275 ***
## household.income[100K-200K]      -2.5644850   0.7998515  -3.206 0.001363 **
## household.income[12K-16K]      -0.1777668   1.0333340  -0.172 0.863427
## household.income[16K-25K]      -0.1266382   0.8583305  -0.148 0.882718
## household.income[25K-35K]      -0.7123444   0.8608932  -0.827 0.408067
## household.income[35K-50K]      -1.2576409   0.8157513  -1.542 0.123282
## household.income[50K-75K]      -1.7625261   0.7905309  -2.230 0.025872 *
## household.income[5K-12K]      -0.1966829   0.8854897  -0.222 0.824242
## household.income[75K-100K]      -2.6915757   0.8147083  -3.304 0.000968 ***
## high.educBachelor      1.2082553   0.7974585   1.515 0.129873
## high.educHS Diploma/GED      -0.8177549   0.7922924  -1.032 0.302114
## high.educPost Graduate Degree      0.4255426   0.8020039   0.531 0.595747
## high.educSome College      0.7704997   0.7601576   1.014 0.310875
## demo_race_hispanic1      -0.0697534   0.3573940  -0.195 0.845275
## ---
## Signif. codes:  0 '***' 0.001 '**' 0.01 '*' 0.05 '.' 0.1 ' ' 1
##
##
## R-sq.(adj) =  0.0308
## lmer.REML = 14768  Scale est. = 15.928   n = 2379
##
##           stdcoef      stdse
## X(Intercept)      0.00000000 0.00000000
## Xhormone_scr_ert_mean      0.010027471 0.02115251
## Xhormone_sal_end_min_since_midnight      0.036399292 0.02208436
## Xpds_p_ss_categoryEarly      0.030153890 0.02105599
## Xpds_p_ss_categoryLate      0.015740051 0.02044515
## Xpds_p_ss_categoryMid      0.046911323 0.02146322
## Xrace.ethnicity.5levelBlack      -0.033229858 0.05239024
## Xrace.ethnicity.5levelMixed      0.064283468 0.05184090
## Xrace.ethnicity.5levelOther      0.005334038 0.03811791
## Xrace.ethnicity.5levelWhite      0.087265268 0.06875360

```

```

## Xinterview_age          0.005409874 0.02059629
## Xbmi                    0.015120703 0.02134070
## Xhousehold.income[>=200K] -0.185772967 0.05099675
## Xhousehold.income[100K-200K] -0.215566872 0.06723435
## Xhousehold.income[12K-16K] -0.004559762 0.02650526
## Xhousehold.income[16K-25K] -0.004739978 0.03212669
## Xhousehold.income[25K-35K] -0.028485738 0.03442601
## Xhousehold.income[35K-50K] -0.062593972 0.04060071
## Xhousehold.income[50K-75K] -0.111266863 0.04990558
## Xhousehold.income[5K-12K] -0.006555606 0.02951412
## Xhousehold.income[75K-100K] -0.173398324 0.05248563
## Xhigh.educBachelor      0.096378257 0.06361045
## Xhigh.educHS Diploma/GED -0.039155399 0.03793621
## Xhigh.educPost Graduate Degree 0.037204568 0.07011804
## Xhigh.educSome College  0.060595773 0.05978242
## Xdemo_race_hispanic1    -0.004954374 0.02538463

```

## 1.15 Model: CBCL Anxious-Depressed ~ Testosterone + PDS

### Female participants

```

##
## Family: gaussian
## Link function: identity
##
## Formula:
## cbcl_scr_syn_anxdep_r ~ hormone_scr_ert_mean + hormone_sal_end_min_since_midnight +
##   PDS_score + race.ethnicity.5level + interview_age + bmi +
##   household.income + high.educ + demo_race_hispanic
##
## Parametric coefficients:
##
##               Estimate Std. Error t value Pr(>|t|)
## (Intercept)    -0.1474743   1.3006223  -0.113  0.90973
## hormone_scr_ert_mean -0.0020267   0.0042730  -0.474  0.63532
## hormone_sal_end_min_since_midnight 0.0003520   0.0003967   0.887  0.37504
## PDS_score       0.3139131   0.1027613   3.055  0.00228 **
## race.ethnicity.5levelBlack -0.2742696   0.4607915  -0.595  0.55176
## race.ethnicity.5levelMixed  0.7800913   0.4478394   1.742  0.08167 .
## race.ethnicity.5levelOther  0.0738792   0.5284416   0.140  0.88883
## race.ethnicity.5levelWhite  0.6910203   0.4160889   1.661  0.09691 .
## interview_age    0.0123825   0.0092363   1.341  0.18018
## bmi              -0.0031050   0.0184162  -0.169  0.86613
## household.income[>=200K] -1.0108430   0.4907583  -2.060  0.03954 *
## household.income[100K-200K] -0.5181084   0.4552856  -1.138  0.25525
## household.income[12K-16K] -0.1029896   0.5888390  -0.175  0.86117
## household.income[16K-25K] -0.5560220   0.5073000  -1.096  0.27318
## household.income[25K-35K]  0.0186861   0.4759666   0.039  0.96869
## household.income[35K-50K] -0.4055175   0.4630561  -0.876  0.38127
## household.income[50K-75K] -0.3051537   0.4547577  -0.671  0.50228
## household.income[5K-12K] -0.1680152   0.5229856  -0.321  0.74804
## household.income[75K-100K] -0.3409762   0.4616468  -0.739  0.46022
## high.educBachelor  0.1972908   0.4270731   0.462  0.64416
## high.educHS Diploma/GED  0.1063651   0.4288322   0.248  0.80413

```

```

## high.educPost Graduate Degree      0.6494771  0.4350427  1.493  0.13561
## high.educSome College              0.4468687  0.3987839  1.121  0.26259
## demo_race_hispanic1               0.0883378  0.2040670  0.433  0.66514
## ---
## Signif. codes:  0 '***' 0.001 '**' 0.01 '*' 0.05 '.' 0.1 ' ' 1
##
##
## R-sq.(adj) =  0.0158
## lmer.REML = 11077  Scale est. = 6.9027    n = 2194

##                               stdcoef      stdse
## X(Intercept)                  0.00000000  0.00000000
## Xhormone_scr_ert_mean         -0.01093472  0.02305375
## Xhormone_sal_end_min_since_midnight  0.020299057  0.02287848
## XPDS_score                    0.073830231  0.02416876
## Xrace.ethnicity.5levelBlack    -0.031576004  0.05304983
## Xrace.ethnicity.5levelMixed    0.084003581  0.04822527
## Xrace.ethnicity.5levelOther    0.005083095  0.03635827
## Xrace.ethnicity.5levelWhite    0.107369214  0.06465099
## Xinterview_age                0.030367528  0.02265171
## Xbmi                          -0.003863601  0.02291580
## Xhousehold.income[>=200K]     -0.104341438  0.05065715
## Xhousehold.income[100K-200K]  -0.079613529  0.06996006
## Xhousehold.income[12K-16K]    -0.004996501  0.02856730
## Xhousehold.income[16K-25K]    -0.036207372  0.03303466
## Xhousehold.income[25K-35K]    0.001484422  0.03781071
## Xhousehold.income[35K-50K]    -0.037887343  0.04326316
## Xhousehold.income[50K-75K]    -0.034227365  0.05100760
## Xhousehold.income[5K-12K]     -0.009958486  0.03099805
## Xhousehold.income[75K-100K]   -0.040365089  0.05465018
## Xhigh.educBachelor            0.028782003  0.06230405
## Xhigh.educHS Diploma/GED     0.009411660  0.03794499
## Xhigh.educPost Graduate Degree  0.102983306  0.06898185
## Xhigh.educSome College        0.063079648  0.05629203
## Xdemo_race_hispanic1         0.011198212  0.02586871

```

## Male participants

```

##
## Family: gaussian
## Link function: identity
##
## Formula:
## cbcl_scr_syn_anxdep_r ~ hormone_scr_ert_mean + hormone_sal_end_min_since_midnight +
##   PDS_score + race.ethnicity.5level + interview_age + bmi +
##   household.income + high.educ + demo_race_hispanic
##
## Parametric coefficients:
##                               Estimate Std. Error t value Pr(>|t|)
## (Intercept)                  2.7312371  1.2650644   2.159  0.03095 *
## hormone_scr_ert_mean          0.0025593  0.0044308   0.578  0.56358
## hormone_sal_end_min_since_midnight  0.0002587  0.0003837   0.674  0.50018
## PDS_score                     0.3148247  0.1264288   2.490  0.01284 *

```

```

## race.ethnicity.5levelBlack      -0.2418499  0.5050002  -0.479  0.63205
## race.ethnicity.5levelMixed      0.4790700  0.4921511   0.973  0.33044
## race.ethnicity.5levelOther      0.2721536  0.5601296   0.486  0.62710
## race.ethnicity.5levelWhite      0.6236600  0.4631967   1.346  0.17829
## interview_age                    -0.0104126  0.0085151  -1.223  0.22151
## bmi                              -0.0044218  0.0176953  -0.250  0.80270
## household.income[>=200K]        -1.2457309  0.4780094  -2.606  0.00922 **
## household.income[100K-200K]     -0.9651871  0.4476459  -2.156  0.03117 *
## household.income[12K-16K]       0.0793923  0.5777511   0.137  0.89071
## household.income[16K-25K]      -0.1493286  0.4807007  -0.311  0.75610
## household.income[25K-35K]      -0.2492141  0.4806234  -0.519  0.60414
## household.income[35K-50K]      -0.3512328  0.4562470  -0.770  0.44148
## household.income[50K-75K]      -0.7743932  0.4427403  -1.749  0.08041 .
## household.income[5K-12K]        0.0179599  0.4955765   0.036  0.97109
## household.income[75K-100K]     -0.9493947  0.4560868  -2.082  0.03749 *
## high.educBachelor               1.0384365  0.4470564   2.323  0.02027 *
## high.educHS Diploma/GED        -0.1351437  0.4439215  -0.304  0.76083
## high.educPost Graduate Degree   0.6959693  0.4495474   1.548  0.12172
## high.educSome College           0.6287425  0.4260991   1.476  0.14019
## demo_race_hispanic1             0.0907242  0.2001789   0.453  0.65044
## ---
## Signif. codes:  0 '***' 0.001 '**' 0.01 '*' 0.05 '.' 0.1 ' ' 1
##
##
## R-sq.(adj) =  0.0155
## lmer.REML = 12074  Scale est. = 6.4306    n = 2379

##                stdcoef      stdse
## X(Intercept)      0.00000000  0.00000000
## Xhormone_scr_ert_mean  0.012383974  0.02144009
## Xhormone_sal_end_min_since_midnight  0.015062238  0.02233745
## XPDS_score        0.054739570  0.02198257
## Xrace.ethnicity.5levelBlack -0.025336016  0.05290346
## Xrace.ethnicity.5levelMixed  0.050874920  0.05226407
## Xrace.ethnicity.5levelOther  0.018710503  0.03850879
## Xrace.ethnicity.5levelWhite  0.093323317  0.06931190
## Xinterview_age    -0.025628197  0.02095794
## Xbmi              -0.005417284  0.02167907
## Xhousehold.income[>=200K] -0.133653205  0.05128515
## Xhousehold.income[100K-200K] -0.145819148  0.06762973
## Xhousehold.income[12K-16K]  0.003660082  0.02663504
## Xhousehold.income[16K-25K] -0.010045594  0.03233757
## Xhousehold.income[25K-35K] -0.017911474  0.03454328
## Xhousehold.income[35K-50K] -0.031418986  0.04081287
## Xhousehold.income[50K-75K] -0.087864414  0.05023433
## Xhousehold.income[5K-12K]  0.001075901  0.02968782
## Xhousehold.income[75K-100K] -0.109927495  0.05280889
## Xhigh.educBachelor  0.148874903  0.06409201
## Xhigh.educHS Diploma/GED -0.011630151  0.03820286
## Xhigh.educPost Graduate Degree  0.109361528  0.07063988
## Xhigh.educSome College  0.088871775  0.06022845
## Xdemo_race_hispanic1  0.011581578  0.02555425

```

## 1.16 Model: CBCL Anxious-Depressed ~ Testosterone + Pubertal category

### Female participants

```
##
## Family: gaussian
## Link function: identity
##
## Formula:
## cbcl_scr_syn_anxdep_r ~ hormone_scr_ert_mean + hormone_sal_end_min_since_midnight +
##   pds_p_ss_category + race.ethnicity.5level + interview_age +
##   bmi + household.income + high.educ + demo_race_hispanic
##
## Parametric coefficients:
##
##           Estimate Std. Error t value Pr(>|t|)
## (Intercept)      0.1130945  1.3447302   0.084  0.9330
## hormone_scr_ert_mean -0.0010164  0.0042580  -0.239  0.8114
## hormone_sal_end_min_since_midnight 0.0003058  0.0003977   0.769  0.4420
## pds_p_ss_categoryEarly 0.2452367  0.1794051   1.367  0.1718
## pds_p_ss_categoryLate 0.2714538  0.4653101   0.583  0.5597
## pds_p_ss_categoryMid 0.4063780  0.1763814   2.304  0.0213 *
## race.ethnicity.5levelBlack -0.2162464  0.4608365  -0.469  0.6389
## race.ethnicity.5levelMixed 0.7990085  0.4483636   1.782  0.0749 .
## race.ethnicity.5levelOther 0.0908101  0.5290057   0.172  0.8637
## race.ethnicity.5levelWhite 0.7024600  0.4165245   1.686  0.0918 .
## interview_age      0.0130394  0.0094450   1.381  0.1676
## bmi                -0.0060622  0.0190825  -0.318  0.7508
## household.income[>=200K] -1.0276877  0.4918901  -2.089  0.0368 *
## household.income[100K-200K] -0.5302331  0.4564655  -1.162  0.2455
## household.income[12K-16K] -0.1829693  0.5892303  -0.311  0.7562
## household.income[16K-25K] -0.5483277  0.5082410  -1.079  0.2808
## household.income[25K-35K] -0.0221415  0.4768142  -0.046  0.9630
## household.income[35K-50K] -0.4321851  0.4635323  -0.932  0.3512
## household.income[50K-75K] -0.3207558  0.4555353  -0.704  0.4814
## household.income[5K-12K] -0.1752306  0.5237732  -0.335  0.7380
## household.income[75K-100K] -0.3633979  0.4623972  -0.786  0.4320
## high.educBachelor    0.1876197  0.4283013   0.438  0.6614
## high.educHS Diploma/GED 0.1186534  0.4294391   0.276  0.7823
## high.educPost Graduate Degree 0.6420506  0.4364024   1.471  0.1414
## high.educSome College 0.4743118  0.3997786   1.186  0.2356
## demo_race_hispanic1  0.0647933  0.2042215   0.317  0.7511
## ---
## Signif. codes:  0 '***' 0.001 '**' 0.01 '*' 0.05 '.' 0.1 ' ' 1
##
##
## R-sq.(adj) =  0.0137
## lmer.REML = 11081  Scale est. = 6.96      n = 2194
##
##           stdcoef      stdse
## X(Intercept)      0.00000000  0.00000000
## Xhormone_scr_ert_mean -0.005483465  0.02297319
## Xhormone_sal_end_min_since_midnight 0.017637669  0.02293656
## Xpds_p_ss_categoryEarly 0.034262044  0.02506470
## Xpds_p_ss_categoryLate 0.013429285  0.02301969
```

```

## Xpds_p_ss_categoryMid          0.065692098 0.02851253
## Xrace.ethnicity.5levelBlack    -0.024895938 0.05305501
## Xrace.ethnicity.5levelMixed     0.086040668 0.04828172
## Xrace.ethnicity.5levelOther     0.006247987 0.03639708
## Xrace.ethnicity.5levelWhite     0.109146702 0.06471867
## Xinterview_age                 0.031978540 0.02316334
## Xbmi                            -0.007543393 0.02374494
## Xhousehold.income[>=200K]      -0.106080182 0.05077398
## Xhousehold.income[100K-200K]   -0.081476639 0.07014136
## Xhousehold.income[12K-16K]     -0.008876686 0.02858628
## Xhousehold.income[16K-25K]     -0.035706327 0.03309594
## Xhousehold.income[25K-35K]     -0.001758914 0.03787804
## Xhousehold.income[35K-50K]     -0.040378886 0.04330765
## Xhousehold.income[50K-75K]     -0.035977363 0.05109482
## Xhousehold.income[5K-12K]      -0.010386153 0.03104473
## Xhousehold.income[75K-100K]    -0.043019381 0.05473902
## Xhigh.educBachelor              0.027371119 0.06248323
## Xhigh.educHS Diploma/GED       0.010498987 0.03799870
## Xhigh.educPost Graduate Degree  0.101805733 0.06919745
## Xhigh.educSome College          0.066953493 0.05643243
## Xdemo_race_hispanic1           0.008213569 0.02588830

```

## Male participants

```

##
## Family: gaussian
## Link function: identity
##
## Formula:
## cbcl_scr_syn_anxdep_r ~ hormone_scr_ert_mean + hormone_sal_end_min_since_midnight +
##   pds_p_ss_category + race.ethnicity.5level + interview_age +
##   bmi + household.income + high.educ + demo_race_hispanic
##
## Parametric coefficients:
##
##           Estimate Std. Error t value Pr(>|t|)
## (Intercept) 2.838562  1.268403  2.238  0.02532 *
## hormone_scr_ert_mean 0.003015  0.004425  0.681  0.49578
## hormone_sal_end_min_since_midnight 0.000257  0.000384  0.669  0.50336
## pds_p_ss_categoryEarly 0.187926  0.157966  1.190  0.23430
## pds_p_ss_categoryLate 0.814948  1.098624  0.742  0.45829
## pds_p_ss_categoryMid 0.671699  0.300350  2.236  0.02542 *
## race.ethnicity.5levelBlack -0.216197  0.504815 -0.428  0.66849
## race.ethnicity.5levelMixed 0.515636  0.492719  1.047  0.29543
## race.ethnicity.5levelOther 0.288673  0.560685  0.515  0.60670
## race.ethnicity.5levelWhite 0.668739  0.463935  1.441  0.14959
## interview_age -0.009429  0.008496 -1.110  0.26721
## bmi -0.002472  0.017645 -0.140  0.88861
## household.income[>=200K] -1.243759  0.478953 -2.597  0.00947 **
## household.income[100K-200K] -0.961957  0.448636 -2.144  0.03212 *
## household.income[12K-16K] 0.079340  0.579178  0.137  0.89105
## household.income[16K-25K] -0.144549  0.481751 -0.300  0.76417
## household.income[25K-35K] -0.229036  0.483028 -0.474  0.63543
## household.income[35K-50K] -0.347642  0.457452 -0.760  0.44736

```



```

## household.income[50K-75K]          -0.769647    0.443453   -1.736    0.08277 .
## household.income[5K-12K]           0.025933    0.496567    0.052    0.95835
## household.income[75K-100K]        -0.951304    0.456890   -2.082    0.03744 *
## high.educBachelor                  1.066659    0.447317    2.385    0.01718 *
## high.educHS Diploma/GED           -0.126485    0.444581   -0.285    0.77605
## high.educPost Graduate Degree       0.724044    0.449820    1.610    0.10761
## high.educSome College               0.645202    0.426566    1.513    0.13053
## demo_race_hispanic1                0.080460    0.200474    0.401    0.68820
## ---
## Signif. codes:  0 '***' 0.001 '**' 0.01 '*' 0.05 '.' 0.1 ' ' 1
##
##
## R-sq.(adj) =  0.0146
## lmer.REML = 12072 Scale est. = 6.4397    n = 2379

##                                stdcoef    stdse
## X(Intercept)                   0.00000000 0.00000000
## Xhormone_scr_ert_mean           0.014587245 0.02141269
## Xhormone_sal_end_min_since_midnight 0.014963554 0.02235634
## Xpds_p_ss_categoryEarly         0.025382267 0.02133572
## Xpds_p_ss_categoryLate         0.015313597 0.02064412
## Xpds_p_ss_categoryMid          0.048645594 0.02175182
## Xrace.ethnicity.5levelBlack     -0.022648588 0.05288408
## Xrace.ethnicity.5levelMixed     0.054757999 0.05232433
## Xrace.ethnicity.5levelOther     0.019846236 0.03854698
## Xrace.ethnicity.5levelWhite     0.100068830 0.06942237
## Xinterview_age                 -0.023207254 0.02091149
## Xbmi                            -0.003028270 0.02161754
## Xhousehold.income[>=200K]       -0.133441668 0.05138642
## Xhousehold.income[100K-200K]    -0.145331155 0.06777925
## Xhousehold.income[12K-16K]      0.003657676 0.02670083
## Xhousehold.income[16K-25K]     -0.009724045 0.03240820
## Xhousehold.income[25K-35K]     -0.016461208 0.03471612
## Xhousehold.income[35K-50K]     -0.031097783 0.04092061
## Xhousehold.income[50K-75K]     -0.087325948 0.05031523
## Xhousehold.income[5K-12K]       0.001553518 0.02974713
## Xhousehold.income[75K-100K]    -0.110148564 0.05290189
## Xhigh.educBachelor              0.152921063 0.06412931
## Xhigh.educHS Diploma/GED       -0.010885013 0.03825964
## Xhigh.educPost Graduate Degree   0.113773145 0.07068265
## Xhigh.educSome College          0.091198303 0.06029441
## Xdemo_race_hispanic1            0.010271323 0.02559198

```

## 1.17 Model: CBCL Withdrawn-Depressed ~ Testosterone + PDS

### Female participants

```

##
## Family: gaussian
## Link function: identity
##
## Formula:
## cbcl_scr_syn_withdep_r ~ hormone_scr_ert_mean + hormone_sal_end_min_since_midnight +

```

```

##      PDS_score + race.ethnicity.5level + interview_age + bmi +
##      household.income + high.educ + demo_race_hispanic
##
## Parametric coefficients:
##
##              Estimate Std. Error t value Pr(>|t|)
## (Intercept)      0.4749241  0.6774111   0.701 0.483324
## hormone_scr_ert_mean      0.0028502  0.0022259   1.280 0.200527
## hormone_sal_end_min_since_midnight -0.0000571  0.0002066  -0.276 0.782284
## PDS_score          0.1591141  0.0534745   2.976 0.002957 **
## race.ethnicity.5levelBlack      -0.4903843  0.2390417  -2.051 0.040342 *
## race.ethnicity.5levelMixed      -0.0292756  0.2322633  -0.126 0.899708
## race.ethnicity.5levelOther      -0.3485297  0.2739778  -1.272 0.203471
## race.ethnicity.5levelWhite      -0.0453880  0.2158951  -0.210 0.833507
## interview_age          0.0032131  0.0048217   0.666 0.505239
## bmi                  0.0134666  0.0095711   1.407 0.159568
## household.income[>=200K]      -0.9084967  0.2541282  -3.575 0.000358 ***
## household.income[100K-200K]    -0.6695469  0.2356401  -2.841 0.004534 **
## household.income[12K-16K]      -0.3862945  0.3043186  -1.269 0.204443
## household.income[16K-25K]      -0.3259204  0.2631970  -1.238 0.215734
## household.income[25K-35K]      -0.1524759  0.2463780  -0.619 0.536067
## household.income[35K-50K]      -0.5910347  0.2398287  -2.464 0.013801 *
## household.income[50K-75K]      -0.5671819  0.2353323  -2.410 0.016029 *
## household.income[5K-12K]       -0.1308079  0.2715993  -0.482 0.630124
## household.income[75K-100K]     -0.5921637  0.2389930  -2.478 0.013297 *
## high.educBachelor          0.1356108  0.2210308   0.614 0.539585
## high.educHS Diploma/GED       0.4057324  0.2223492   1.825 0.068176 .
## high.educPost Graduate Degree   0.1914676  0.2252086   0.850 0.395319
## high.educSome College         0.2064858  0.2064999   1.000 0.317455
## demo_race_hispanic1          -0.0060614  0.1056212  -0.057 0.954241
## ---
## Signif. codes:  0 '***' 0.001 '**' 0.01 '*' 0.05 '.' 0.1 ' ' 1
##
##
## R-sq.(adj) =  0.0237
## lmer.REML = 8254.3  Scale est. = 2.269    n = 2194
##
##              stdcoef      stdse
## X(Intercept)      0.000000000  0.000000000
## Xhormone_scr_ert_mean      0.029448697  0.02299885
## Xhormone_sal_end_min_since_midnight -0.006306394  0.02281798
## XPDS_score          0.071667214  0.02408568
## Xrace.ethnicity.5levelBlack      -0.108119312  0.05270361
## Xrace.ethnicity.5levelMixed      -0.006037337  0.04789830
## Xrace.ethnicity.5levelOther      -0.045923296  0.03610012
## Xrace.ethnicity.5levelWhite      -0.013505701  0.06424197
## Xinterview_age          0.015090769  0.02264590
## Xbmi                  0.032090664  0.02280774
## Xhousehold.income[>=200K]      -0.179590604  0.05023578
## Xhousehold.income[100K-200K]    -0.197030918  0.06934299
## Xhousehold.income[12K-16K]      -0.035890397  0.02827406
## Xhousehold.income[16K-25K]      -0.040644677  0.03282261
## Xhousehold.income[25K-35K]      -0.023196717  0.03748240
## Xhousehold.income[35K-50K]      -0.105751061  0.04291142
## Xhousehold.income[50K-75K]      -0.121832831  0.05055028

```

```

## Xhousehold.income[5K-12K] -0.014847923 0.03082907
## Xhousehold.income[75K-100K] -0.134248900 0.05418189
## Xhigh.educBachelor 0.037887458 0.06175243
## Xhigh.educHS Diploma/GED 0.068753363 0.03767817
## Xhigh.educPost Graduate Degree 0.058141382 0.06838723
## Xhigh.educSome College 0.055819577 0.05582339
## Xdemo_race_hispanic1 -0.001471514 0.02564132

```

Male participants

```

##
## Family: gaussian
## Link function: identity
##
## Formula:
## cbcl_scr_syn_withdep_r ~ hormone_scr_ert_mean + hormone_sal_end_min_since_midnight +
## PDS_score + race.ethnicity.5level + interview_age + bmi +
## household.income + high.educ + demo_race_hispanic
##
## Parametric coefficients:
## Estimate Std. Error t value Pr(>|t|)
## (Intercept) 0.1662964 0.7336302 0.227 0.820695
## hormone_scr_ert_mean 0.0030111 0.0025615 1.176 0.239905
## hormone_sal_end_min_since_midnight 0.0005049 0.0002147 2.352 0.018749 *
## PDS_score 0.1249157 0.0736918 1.695 0.090187 .
## race.ethnicity.5levelBlack -0.1685618 0.2933680 -0.575 0.565634
## race.ethnicity.5levelMixed 0.2736702 0.2863042 0.956 0.339235
## race.ethnicity.5levelOther 0.0409310 0.3260456 0.126 0.900109
## race.ethnicity.5levelWhite 0.1336041 0.2689224 0.497 0.619367
## interview_age 0.0105336 0.0049453 2.130 0.033272 *
## bmi -0.0037954 0.0103120 -0.368 0.712866
## household.income[>=200K] -1.0743043 0.2778328 -3.867 0.000113 ***
## household.income[100K-200K] -0.9198702 0.2606151 -3.530 0.000424 ***
## household.income[12K-16K] 0.0168451 0.3372803 0.050 0.960171
## household.income[16K-25K] 0.0351614 0.2803377 0.125 0.900198
## household.income[25K-35K] -0.2660585 0.2802901 -0.949 0.342603
## household.income[35K-50K] -0.5133837 0.2662264 -1.928 0.053929 .
## household.income[50K-75K] -0.6828431 0.2580982 -2.646 0.008207 **
## household.income[5K-12K] -0.0679823 0.2894138 -0.235 0.814309
## household.income[75K-100K] -0.9692972 0.2658004 -3.647 0.000271 ***
## high.educBachelor -0.0710885 0.2601255 -0.273 0.784658
## high.educHS Diploma/GED -0.5687296 0.2582706 -2.202 0.027757 *
## high.educPost Graduate Degree -0.3417871 0.2617167 -1.306 0.191699
## high.educSome College -0.1515277 0.2477497 -0.612 0.540851
## demo_race_hispanic1 -0.1496095 0.1122697 -1.333 0.182795
## ---
## Signif. codes: 0 '***' 0.001 '**' 0.01 '*' 0.05 '.' 0.1 ' ' 1
##
##
## R-sq.(adj) = 0.0393
## lmer.REML = 9527.6 Scale est. = 2.0699 n = 2379

## stdcoef stdse

```

```

## X(Intercept)                0.00000000 0.00000000
## Xhormone_scr_ert_mean        0.024764079 0.02106645
## Xhormone_sal_end_min_since_midnight 0.049961021 0.02124085
## XPDS_score                   0.036915454 0.02177761
## Xrace.ethnicity.5levelBlack -0.030013049 0.05223525
## Xrace.ethnicity.5levelMixed  0.049395895 0.05167625
## Xrace.ethnicity.5levelOther  0.004782801 0.03809853
## Xrace.ethnicity.5levelWhite  0.033979788 0.06839553
## Xinterview_age              0.044064971 0.02068746
## Xbmi                        -0.007903102 0.02147270
## Xhousehold.income[>=200K]   -0.195902944 0.05066373
## Xhousehold.income[100K-200K] -0.236204468 0.06692081
## Xhousehold.income[12K-16K]  0.001319914 0.02642786
## Xhousehold.income[16K-25K]  0.004020286 0.03205329
## Xhousehold.income[25K-35K]  -0.032500816 0.03423930
## Xhousehold.income[35K-50K]  -0.078054449 0.04047685
## Xhousehold.income[50K-75K]  -0.131683368 0.04977313
## Xhousehold.income[5K-12K]   -0.006921848 0.02946763
## Xhousehold.income[75K-100K] -0.190754582 0.05230867
## Xhigh.educBachelor          -0.017322063 0.06338448
## Xhigh.educHS Diploma/GED   -0.083186727 0.03777662
## Xhigh.educPost Graduate Degree -0.091282724 0.06989793
## Xhigh.educSome College      -0.036403367 0.05951998
## Xdemo_race_hispanic1       -0.032461048 0.02435936

```

## 1.18 Model: CBCL Withdrawn-Depressed ~ Testosterone + Pubertal category

### Female participants

```

##
## Family: gaussian
## Link function: identity
##
## Formula:
## cbcl_scr_syn_withdep_r ~ hormone_scr_ert_mean + hormone_sal_end_min_since_midnight +
##   pds_p_ss_category + race.ethnicity.5level + interview_age +
##   bmi + household.income + high.educ + demo_race_hispanic
##
## Parametric coefficients:
##
##               Estimate Std. Error t value Pr(>|t|)
## (Intercept)      5.779e-01  7.004e-01   0.825 0.409458
## hormone_scr_ert_mean  3.360e-03  2.219e-03   1.515 0.130034
## hormone_sal_end_min_since_midnight -6.178e-05  2.072e-04 -0.298 0.765552
## pds_p_ss_categoryEarly  1.200e-02  9.357e-02   0.128 0.897927
## pds_p_ss_categoryLate  2.747e-01  2.422e-01   1.134 0.256893
## pds_p_ss_categoryMid  1.660e-01  9.186e-02   1.807 0.070923
## race.ethnicity.5levelBlack -4.645e-01  2.392e-01 -1.942 0.052254
## race.ethnicity.5levelMixed -1.629e-02  2.326e-01 -0.070 0.944172
## race.ethnicity.5levelOther -3.355e-01  2.744e-01 -1.223 0.221597
## race.ethnicity.5levelWhite -3.734e-02  2.162e-01 -0.173 0.862882
## interview_age       3.902e-03  4.930e-03   0.791 0.428772
## bmi                 1.259e-02  9.921e-03   1.269 0.204590
## household.income[>=200K] -9.187e-01  2.548e-01 -3.605 0.000319 ***

```

```

## household.income[100K-200K]      -6.756e-01  2.364e-01  -2.859  0.004295 **
## household.income[12K-16K]       -4.199e-01  3.047e-01  -1.378  0.168289
## household.income[16K-25K]       -3.334e-01  2.638e-01  -1.264  0.206383
## household.income[25K-35K]       -1.749e-01  2.469e-01  -0.709  0.478708
## household.income[35K-50K]       -6.094e-01  2.402e-01  -2.538  0.011233 *
## household.income[50K-75K]       -5.772e-01  2.358e-01  -2.447  0.014465 *
## household.income[5K-12K]        -1.407e-01  2.721e-01  -0.517  0.605066
## household.income[75K-100K]     -6.070e-01  2.395e-01  -2.535  0.011325 *
## high.educBachelor                1.326e-01  2.218e-01   0.598  0.550115
## high.educHS Diploma/GED         4.100e-01  2.228e-01   1.841  0.065802 .
## high.educPost Graduate Degree    1.908e-01  2.260e-01   0.844  0.398659
## high.educSome College            2.205e-01  2.071e-01   1.064  0.287263
## demo_race_hispanic1             -1.817e-02  1.058e-01  -0.172  0.863593
## ---
## Signif. codes:  0 '***' 0.001 '**' 0.01 '*' 0.05 '.' 0.1 ' ' 1
##
##
## R-sq.(adj) =  0.0211
## lmer.REML = 8261.8  Scale est. = 2.2679    n = 2194

##
##                stdcoef      stdse
## X(Intercept)      0.00000000  0.00000000
## Xhormone_scr_ert_mean      0.034719992  0.02292443
## Xhormone_sal_end_min_since_midnight -0.006824073  0.02288144
## Xpds_p_ss_categoryEarly      0.003211947  0.02503557
## Xpds_p_ss_categoryLate      0.026025022  0.02294847
## Xpds_p_ss_categoryMid      0.051383481  0.02843800
## Xrace.ethnicity.5levelBlack -0.102410574  0.05273183
## Xrace.ethnicity.5levelMixed -0.003359807  0.04797293
## Xrace.ethnicity.5levelOther -0.044202540  0.03615326
## Xrace.ethnicity.5levelWhite -0.011111886  0.06433220
## Xinterview_age      0.018325480  0.02315453
## Xbmi                0.029999534  0.02364098
## Xhousehold.income[>=200K]    -0.181606451  0.05037115
## Xhousehold.income[100K-200K] -0.198826625  0.06955234
## Xhousehold.income[12K-16K]   -0.039009515  0.02830503
## Xhousehold.income[16K-25K]   -0.041575886  0.03289359
## Xhousehold.income[25K-35K]   -0.026615640  0.03756592
## Xhousehold.income[35K-50K]   -0.109041856  0.04297175
## Xhousehold.income[50K-75K]   -0.123983306  0.05065769
## Xhousehold.income[5K-12K]    -0.015973059  0.03088340
## Xhousehold.income[75K-100K]  -0.137611401  0.05429186
## Xhigh.educBachelor           0.037033811  0.06196246
## Xhigh.educHS Diploma/GED     0.069480582  0.03774682
## Xhigh.educPost Graduate Degree 0.057942841  0.06863753
## Xhigh.educSome College       0.059595868  0.05598973
## Xdemo_race_hispanic1        -0.004411155  0.02567280

```

## Male participants

```

##
## Family: gaussian
## Link function: identity

```

```

##
## Formula:
## cbcl_scr_syn_withdep_r ~ hormone_scr_ert_mean + hormone_sal_end_min_since_midnight +
##   pds_p_ss_category + race.ethnicity.5level + interview_age +
##   bmi + household.income + high.educ + demo_race_hispanic
##
## Parametric coefficients:
##
##           Estimate Std. Error t value Pr(>|t|)
## (Intercept)      0.2092646   0.7352380   0.285 0.775959
## hormone_scr_ert_mean      0.0032402   0.0025571   1.267 0.205222
## hormone_sal_end_min_since_midnight      0.0005022   0.0002147   2.339 0.019397 *
## pds_p_ss_categoryEarly      0.0572828   0.0919353   0.623 0.533294
## pds_p_ss_categoryLate     -0.4159963   0.6407029  -0.649 0.516220
## pds_p_ss_categoryMid       0.3362648   0.1751697   1.920 0.055023 .
## race.ethnicity.5levelBlack  -0.1480995   0.2930921  -0.505 0.613395
## race.ethnicity.5levelMixed   0.2942239   0.2864935   1.027 0.304534
## race.ethnicity.5levelOther   0.0574039   0.3262230   0.176 0.860336
## race.ethnicity.5levelWhite   0.1572625   0.2692283   0.584 0.559193
## interview_age              0.0110921   0.0049327   2.249 0.024626 *
## bmi                       -0.0028786   0.0102788  -0.280 0.779461
## household.income[>=200K]    -1.0891504   0.2782600  -3.914 9.33e-05 ***
## household.income[100K-200K]  -0.9341644   0.2611014  -3.578 0.000354 ***
## household.income[12K-16K]   -0.0087476   0.3379642  -0.026 0.979353
## household.income[16K-25K]    0.0276251   0.2808236   0.098 0.921645
## household.income[25K-35K]   -0.2697189   0.2815953  -0.958 0.338250
## household.income[35K-50K]   -0.5280127   0.2668125  -1.979 0.047936 *
## household.income[50K-75K]   -0.6910410   0.2584062  -2.674 0.007542 **
## household.income[5K-12K]    -0.0814459   0.2898513  -0.281 0.778741
## household.income[75K-100K]  -0.9848292   0.2661698  -3.700 0.000221 ***
## high.educBachelor          -0.0708398   0.2601759  -0.272 0.785433
## high.educHS Diploma/GED    -0.5822897   0.2585523  -2.252 0.024407 *
## high.educPost Graduate Degree -0.3409967   0.2617654  -1.303 0.192811
## high.educSome College       -0.1596498   0.2479319  -0.644 0.519686
## demo_race_hispanic1        -0.1572059   0.1123687  -1.399 0.161939
## ---
## Signif. codes:  0 '***' 0.001 '**' 0.01 '*' 0.05 '.' 0.1 ' ' 1
##
##
## R-sq.(adj) =  0.0393
## lmer.REML = 9526.4  Scale est. = 2.0798    n = 2379
##
##           stdcoef      stdse
## X(Intercept)      0.0000000000 0.00000000
## Xhormone_scr_ert_mean      0.0266486274 0.02103015
## Xhormone_sal_end_min_since_midnight      0.0496964810 0.02124304
## Xpds_p_ss_categoryEarly      0.0131500003 0.02110492
## Xpds_p_ss_categoryLate     -0.0132860337 0.02046268
## Xpds_p_ss_categoryMid       0.0413912347 0.02156185
## Xrace.ethnicity.5levelBlack  -0.0263696640 0.05218613
## Xrace.ethnicity.5levelMixed   0.0531057061 0.05171043
## Xrace.ethnicity.5levelOther   0.0067076625 0.03811926
## Xrace.ethnicity.5levelWhite   0.0399968783 0.06847335
## Xinterview_age              0.0464015074 0.02063512
## Xbmi                       -0.0059941241 0.02140347

```

```

## Xhousehold.income[>=200K] -0.1986101810 0.05074163
## Xhousehold.income[100K-200K] -0.2398749355 0.06704567
## Xhousehold.income[12K-16K] -0.0006854266 0.02648145
## Xhousehold.income[16K-25K] 0.0031586052 0.03210885
## Xhousehold.income[25K-35K] -0.0329479638 0.03439875
## Xhousehold.income[35K-50K] -0.0802786297 0.04056595
## Xhousehold.income[50K-75K] -0.1332642944 0.04983253
## Xhousehold.income[5K-12K] -0.0082926916 0.02951218
## Xhousehold.income[75K-100K] -0.1938112199 0.05238137
## Xhigh.educBachelor -0.0172614478 0.06339677
## Xhigh.educHS Diploma/GED -0.0851701313 0.03781783
## Xhigh.educPost Graduate Degree -0.0910716279 0.06991094
## Xhigh.educSome College -0.0383546327 0.05956374
## Xdemo_race_hispanic1 -0.0341092401 0.02438083

```

## 1.19 Model: CBCL Depressed DSM-5 ~ Testosterone + PDS

### Female participants

```

##
## Family: gaussian
## Link function: identity
##
## Formula:
## cbcl_scr_dsm5_depress_r ~ hormone_scr_ert_mean + hormone_sal_end_min_since_midnight +
## PDS_score + race.ethnicity.5level + interview_age + bmi +
## household.income + high.educ + demo_race_hispanic
##
## Parametric coefficients:
##
## Estimate Std. Error t value Pr(>|t|)
## (Intercept) 0.7329447 0.7922449 0.925 0.35499
## hormone_scr_ert_mean -0.0006339 0.0026033 -0.243 0.80764
## hormone_sal_end_min_since_midnight 0.0001436 0.0002405 0.597 0.55059
## PDS_score 0.1121565 0.0626583 1.790 0.07360 .
## race.ethnicity.5levelBlack -0.1981417 0.2805824 -0.706 0.48015
## race.ethnicity.5levelMixed 0.2021829 0.2729169 0.741 0.45888
## race.ethnicity.5levelOther -0.2566456 0.3221469 -0.797 0.42573
## race.ethnicity.5levelWhite 0.2570199 0.2533572 1.014 0.31048
## interview_age 0.0026545 0.0056264 0.472 0.63713
## bmi 0.0103957 0.0112319 0.926 0.35478
## household.income[>=200K] -0.8101511 0.2993534 -2.706 0.00686 **
## household.income[100K-200K] -0.6652596 0.2777634 -2.395 0.01670 *
## household.income[12K-16K] -0.0928040 0.3593345 -0.258 0.79623
## household.income[16K-25K] -0.4328090 0.3094806 -1.399 0.16211
## household.income[25K-35K] -0.1500203 0.2904260 -0.517 0.60552
## household.income[35K-50K] -0.4022745 0.2824866 -1.424 0.15458
## household.income[50K-75K] -0.5263118 0.2774590 -1.897 0.05797 .
## household.income[5K-12K] -0.0307932 0.3190285 -0.097 0.92312
## household.income[75K-100K] -0.5404168 0.2816470 -1.919 0.05514 .
## high.educBachelor -0.1294081 0.2605665 -0.497 0.61949
## high.educHS Diploma/GED -0.0097230 0.2615916 -0.037 0.97035
## high.educPost Graduate Degree 0.0640450 0.2654093 0.241 0.80934
## high.educSome College -0.0166985 0.2433245 -0.069 0.94529

```

```

## demo_race_hispanic1          -0.0419100  0.1240251  -0.338  0.73546
## ---
## Signif. codes:  0 '***' 0.001 '**' 0.01 '*' 0.05 '.' 0.1 ' ' 1
##
##
## R-sq.(adj) =  0.00929
## lmer.REML = 8927.5  Scale est. = 2.5026    n = 2194

##                               stdcoef      stdse
## X(Intercept)                   0.00000000  0.00000000
## Xhormone_scr_ert_mean           -0.005646846  0.02319056
## Xhormone_sal_end_min_since_midnight  0.013674021  0.02290549
## XPDS_score                      0.043553078  0.02433174
## Xrace.ethnicity.5levelBlack     -0.037663875  0.05333466
## Xrace.ethnicity.5levelMixed      0.035947294  0.04852352
## Xrace.ethnicity.5levelOther     -0.029154766  0.03659567
## Xrace.ethnicity.5levelWhite      0.065936409  0.06499677
## Xinterview_age                  0.010748532  0.02278259
## Xbmi                             0.021357943  0.02307579
## Xhousehold.income[>=200K]       -0.138072956  0.05101840
## Xhousehold.income[100K-200K]    -0.168782288  0.07047106
## Xhousehold.income[12K-16K]      -0.007433766  0.02878332
## Xhousehold.income[16K-25K]      -0.046534037  0.03327422
## Xhousehold.income[25K-35K]      -0.019676955  0.03809284
## Xhousehold.income[35K-50K]      -0.062054963  0.04357646
## Xhousehold.income[50K-75K]      -0.097469201  0.05138344
## Xhousehold.income[5K-12K]       -0.003013487  0.03122077
## Xhousehold.income[75K-100K]    -0.105628263  0.05504988
## Xhigh.educBachelor              -0.031170584  0.06276277
## Xhigh.educHS Diploma/GED       -0.001420491  0.03821733
## Xhigh.educPost Graduate Degree   0.016767089  0.06948461
## Xhigh.educSome College          -0.003891861  0.05671065
## Xdemo_race_hispanic1           -0.008771805  0.02595859

```

## Male participants

```

##
## Family: gaussian
## Link function: identity
##
## Formula:
## cbcl_scr_dsm5_depress_r ~ hormone_scr_ert_mean + hormone_sal_end_min_since_midnight +
##   PDS_score + race.ethnicity.5level + interview_age + bmi +
##   household.income + high.educ + demo_race_hispanic
##
## Parametric coefficients:
##                               Estimate Std. Error t value Pr(>|t|)
## (Intercept)                   1.1512508  0.8548827   1.347 0.178214
## hormone_scr_ert_mean           0.0020613  0.0029940   0.688 0.491220
## hormone_sal_end_min_since_midnight  0.0004118  0.0002576   1.598 0.110066
## PDS_score                      0.1259513  0.0854774   1.474 0.140749
## race.ethnicity.5levelBlack     -0.1607423  0.3422252  -0.470 0.638615
## race.ethnicity.5levelMixed      0.2170055  0.3336456   0.650 0.515493

```



```

## race.ethnicity.5levelOther      0.0416674  0.3792214  0.110 0.912517
## race.ethnicity.5levelWhite      0.1822303  0.3137924  0.581 0.561474
## interview_age                    0.0041179  0.0057451  0.717 0.473590
## bmi                              -0.0063291  0.0119679  -0.529 0.596966
## household.income[>=200K]        -1.1670889  0.3244038  -3.598 0.000328 ***
## household.income[100K-200K]     -1.1453964  0.3037882  -3.770 0.000167 ***
## household.income[12K-16K]       0.0916379  0.3925174  0.233 0.815423
## household.income[16K-25K]       -0.4153483  0.3261648  -1.273 0.202991
## household.income[25K-35K]       -0.6071971  0.3261823  -1.862 0.062794 .
## household.income[35K-50K]       -0.7705732  0.3098218  -2.487 0.012946 *
## household.income[50K-75K]       -0.8482312  0.3005166  -2.823 0.004804 **
## household.income[5K-12K]        -0.2270973  0.3365819  -0.675 0.499922
## household.income[75K-100K]      -0.9936710  0.3096258  -3.209 0.001349 **
## high.educBachelor                0.2652065  0.3033496  0.874 0.382066
## high.educHS Diploma/GED        -0.3918441  0.3011259  -1.301 0.193296
## high.educPost Graduate Degree    -0.0573529  0.3050946  -0.188 0.850905
## high.educSome College            0.2545760  0.2889903  0.881 0.378453
## demo_race_hispanic1             -0.1283901  0.1348766  -0.952 0.341242
## ---
## Signif. codes:  0 '***' 0.001 '**' 0.01 '*' 0.05 '.' 0.1 ' ' 1
##
##
## R-sq.(adj) =  0.0254
## lmer.REML = 10228  Scale est. = 2.4137    n = 2379

##                stdcoef      stdse
## X(Intercept)      0.00000000  0.00000000
## Xhormone_scr_ert_mean  0.014668757  0.02130607
## Xhormone_sal_end_min_since_midnight  0.035254939  0.02205504
## XPDS_score        0.032206845  0.02185732
## Xrace.ethnicity.5levelBlack -0.024764840  0.05272509
## Xrace.ethnicity.5levelMixed  0.033891314  0.05210784
## Xrace.ethnicity.5levelOther  0.004212899  0.03834221
## Xrace.ethnicity.5levelWhite  0.040102908  0.06905539
## Xinterview_age     0.014905581  0.02079562
## Xbmi               -0.011403496  0.02156322
## Xhousehold.income[>=200K] -0.184150113  0.05118633
## Xhousehold.income[100K-200K] -0.254490625  0.06749738
## Xhousehold.income[12K-16K]  0.006212987  0.02661242
## Xhousehold.income[16K-25K] -0.041092069  0.03226878
## Xhousehold.income[25K-35K] -0.064180229  0.03447720
## Xhousehold.income[35K-50K] -0.101373360  0.04075885
## Xhousehold.income[50K-75K] -0.141539820  0.05014560
## Xhousehold.income[5K-12K]  -0.020007486  0.02965318
## Xhousehold.income[75K-100K] -0.169205708  0.05272415
## Xhigh.educBachelor      0.055916325  0.06395845
## Xhigh.educHS Diploma/GED -0.049592493  0.03811104
## Xhigh.educPost Graduate Degree -0.013253871  0.07050532
## Xhigh.educSome College  0.052920196  0.06007409
## Xdemo_race_hispanic1   -0.024104000  0.02532179

```

## 1.20 Model: CBCL Depressed DSM-5 ~ Testosterone + Pubertal category

### Female participants

```
##
## Family: gaussian
## Link function: identity
##
## Formula:
## cbcl_scr_dsm5_depress_r ~ hormone_scr_ert_mean + hormone_sal_end_min_since_midnight +
##   pds_p_ss_category + race.ethnicity.5level + interview_age +
##   bmi + household.income + high.educ + demo_race_hispanic
##
## Parametric coefficients:
##
##           Estimate Std. Error t value Pr(>|t|)
## (Intercept)      0.8478270  0.8185592   1.036  0.30043
## hormone_scr_ert_mean -0.0004206  0.0025923  -0.162  0.87114
## hormone_sal_end_min_since_midnight  0.0001385  0.0002411   0.574  0.56578
## pds_p_ss_categoryEarly  0.0159055  0.1092878   0.146  0.88430
## pds_p_ss_categoryLate  0.1266151  0.2834960   0.447  0.65519
## pds_p_ss_categoryMid   0.1538762  0.1074603   1.432  0.15231
## race.ethnicity.5levelBlack -0.1879642  0.2804143  -0.670  0.50273
## race.ethnicity.5levelMixed  0.2060143  0.2730257   0.755  0.45059
## race.ethnicity.5levelOther -0.2489929  0.3222349  -0.773  0.43978
## race.ethnicity.5levelWhite  0.2596160  0.2534493   1.024  0.30579
## interview_age         0.0028242  0.0057495   0.491  0.62333
## bmi                   0.0091407  0.0116286   0.786  0.43192
## household.income[>=200K] -0.8059592  0.2997868  -2.688  0.00723 **
## household.income[100K-200K] -0.6596126  0.2782410  -2.371  0.01784 *
## household.income[12K-16K]  -0.1107718  0.3592581  -0.308  0.75786
## household.income[16K-25K]  -0.4309941  0.3097888  -1.391  0.16429
## household.income[25K-35K]  -0.1582130  0.2906851  -0.544  0.58631
## household.income[35K-50K]  -0.4099075  0.2825349  -1.451  0.14697
## household.income[50K-75K]  -0.5262291  0.2776918  -1.895  0.05822 .
## household.income[5K-12K]   -0.0334329  0.3192385  -0.105  0.91660
## household.income[75K-100K] -0.5419942  0.2818604  -1.923  0.05462 .
## high.educBachelor        -0.1385506  0.2610855  -0.531  0.59570
## high.educHS Diploma/GED  -0.0103984  0.2617359  -0.040  0.96831
## high.educPost Graduate Degree  0.0553668  0.2660060   0.208  0.83514
## high.educSome College    -0.0144021  0.2437156  -0.059  0.95288
## demo_race_hispanic1     -0.0491056  0.1240621  -0.396  0.69228
## ---
## Signif. codes:  0 '***' 0.001 '**' 0.01 '*' 0.05 '.' 0.1 ' ' 1
##
##
## R-sq.(adj) =  0.00826
## lmer.REML = 8930.8  Scale est. = 2.5265    n = 2194
##
##           stdcoef      stdse
## X(Intercept)      0.00000000  0.00000000
## Xhormone_scr_ert_mean -0.003746282  0.02309240
## Xhormone_sal_end_min_since_midnight  0.013186416  0.02295798
## Xpds_p_ss_categoryEarly  0.003668969  0.02520976
## Xpds_p_ss_categoryLate  0.010342182  0.02315653
```

```

## Xpds_p_ss_categoryMid          0.041069921 0.02868141
## Xrace.ethnicity.5levelBlack    -0.035729271 0.05330269
## Xrace.ethnicity.5levelMixed    0.036628516 0.04854287
## Xrace.ethnicity.5levelOther    -0.028285417 0.03660567
## Xrace.ethnicity.5levelWhite    0.066602398 0.06502039
## Xinterview_age                 0.011435636 0.02328088
## Xbmi                            0.018779432 0.02389084
## Xhousehold.income[>=200K]     -0.137358538 0.05109225
## Xhousehold.income[100K-200K]  -0.167349595 0.07059221
## Xhousehold.income[12K-16K]    -0.008873018 0.02877720
## Xhousehold.income[16K-25K]    -0.046338906 0.03330736
## Xhousehold.income[25K-35K]    -0.020751522 0.03812681
## Xhousehold.income[35K-50K]    -0.063232443 0.04358390
## Xhousehold.income[50K-75K]    -0.097453891 0.05142655
## Xhousehold.income[5K-12K]     -0.003271809 0.03124132
## Xhousehold.income[75K-100K]   -0.105936571 0.05509159
## Xhigh.educBachelor            -0.033372761 0.06288778
## Xhigh.educHS Diploma/GED     -0.001519158 0.03823841
## Xhigh.educPost Graduate Degree 0.014495119 0.06964082
## Xhigh.educSome College        -0.003356634 0.05680179
## Xdemo_race_hispanic1         -0.010277864 0.02596633

```

## Male participants

```

##
## Family: gaussian
## Link function: identity
##
## Formula:
## cbcl_scr_dsm5_depress_r ~ hormone_scr_ert_mean + hormone_sal_end_min_since_midnight +
##   pds_p_ss_category + race.ethnicity.5level + interview_age +
##   bmi + household.income + high.educ + demo_race_hispanic
##
## Parametric coefficients:
##
##           Estimate Std. Error t value Pr(>|t|)
## (Intercept) 1.2446890  0.8567825   1.453 0.146427
## hormone_scr_ert_mean 0.0020959  0.0029886   0.701 0.483189
## hormone_sal_end_min_since_midnight 0.0004113  0.0002576   1.596 0.110564
## pds_p_ss_categoryEarly 0.1816433  0.1067537   1.702 0.088978 .
## pds_p_ss_categoryLate 0.7119674  0.7446666   0.956 0.339126
## pds_p_ss_categoryMid 0.1698766  0.2030231   0.837 0.402826
## race.ethnicity.5levelBlack -0.1613089  0.3419476  -0.472 0.637159
## race.ethnicity.5levelMixed 0.2226316  0.3338963   0.667 0.504985
## race.ethnicity.5levelOther 0.0429096  0.3794425   0.113 0.909972
## race.ethnicity.5levelWhite 0.1974357  0.3141618   0.628 0.529769
## interview_age 0.0040662  0.0057301   0.710 0.478007
## bmi -0.0063638  0.0119295  -0.533 0.593772
## household.income[>=200K] -1.1598034  0.3249337  -3.569 0.000365 ***
## household.income[100K-200K] -1.1364740  0.3043665  -3.734 0.000193 ***
## household.income[12K-16K] 0.1053358  0.3933603   0.268 0.788889
## household.income[16K-25K] -0.4188299  0.3267602  -1.282 0.200051
## household.income[25K-35K] -0.6093998  0.3277276  -1.859 0.063085 .
## household.income[35K-50K] -0.7657596  0.3105376  -2.466 0.013737 *

```

```

## household.income[50K-75K]          -0.8438526  0.3008998  -2.804  0.005082  **
## household.income[5K-12K]           -0.2196243  0.3371366  -0.651  0.514826
## household.income[75K-100K]         -0.9900089  0.3100697  -3.193  0.001427  **
## high.educBachelor                   0.2766757  0.3034185   0.912  0.361935
## high.educHS Diploma/GED            -0.3779824  0.3014643  -1.254  0.210031
## high.educPost Graduate Degree       -0.0463942  0.3051730  -0.152  0.879180
## high.educSome College               0.2641331  0.2892062   0.913  0.361176
## demo_race_hispanic1                -0.1289859  0.1349956  -0.955  0.339432
## ---
## Signif. codes:  0 '***' 0.001 '**' 0.01 '*' 0.05 '.' 0.1 ' ' 1
##
##
## R-sq.(adj) =  0.0251
## lmer.REML = 10226  Scale est. = 2.41      n = 2379

##                                stdcoef      stdse
## X(Intercept)                   0.00000000  0.00000000
## Xhormone_scr_ert_mean            0.014914973  0.02126778
## Xhormone_sal_end_min_since_midnight 0.035211122  0.02205847
## Xpds_p_ss_categoryEarly          0.036080726  0.02120503
## Xpds_p_ss_categoryLate           0.019675253  0.02057890
## Xpds_p_ss_categoryMid            0.018093179  0.02162354
## Xrace.ethnicity.5levelBlack      -0.024852132  0.05268233
## Xrace.ethnicity.5levelMixed       0.034769989  0.05214699
## Xrace.ethnicity.5levelOther       0.004338487  0.03836456
## Xrace.ethnicity.5levelWhite       0.043449116  0.06913669
## Xinterview_age                   0.014718506  0.02074124
## Xbmi                              -0.011466051  0.02149412
## Xhousehold.income[>=200K]        -0.183000566  0.05126994
## Xhousehold.income[100K-200K]     -0.252508191  0.06762585
## Xhousehold.income[12K-16K]        0.007141696  0.02666957
## Xhousehold.income[16K-25K]       -0.041436518  0.03232769
## Xhousehold.income[25K-35K]       -0.064413052  0.03464053
## Xhousehold.income[35K-50K]       -0.100740106  0.04085302
## Xhousehold.income[50K-75K]       -0.140809191  0.05020954
## Xhousehold.income[5K-12K]        -0.019349102  0.02970205
## Xhousehold.income[75K-100K]     -0.168582123  0.05279973
## Xhigh.educBachelor                0.058334497  0.06397297
## Xhigh.educHS Diploma/GED        -0.047838130  0.03815386
## Xhigh.educPost Graduate Degree    -0.010721387  0.07052344
## Xhigh.educSome College            0.054906873  0.06011897
## Xdemo_race_hispanic1             -0.024215872  0.02534413

```

## 2—Reward~Puberty—

### 2.1 Model: BIS-BAS-RR ~ PDS

#### Female participants

```
##
## Family: gaussian
## Link function: identity
##
## Formula:
## bisbas_ss_basm_rr_z ~ PDS_score + interview_age + bmi
##
## Parametric coefficients:
##           Estimate Std. Error t value Pr(>|t|)
## (Intercept)  0.133146  0.325594  0.409 0.682623
## PDS_score    0.044939  0.029001  1.550 0.121371
## interview_age -0.005092  0.002722  -1.870 0.061540 .
## bmi          0.018625  0.005168   3.604 0.000319 ***
## ---
## Signif. codes:  0 '***' 0.001 '**' 0.01 '*' 0.05 '.' 0.1 ' ' 1
##
##
## R-sq.(adj) =  0.00937
## lmer.REML = 7517.1  Scale est. = 0.7584    n = 2653

##           stdcoef      stdse
## X(Intercept)  0.00000000 0.00000000
## XPDS_score    0.03260046 0.02103877
## Xinterview_age -0.03787395 0.02024920
## Xbmi          0.07275213 0.02018564
```

#### Male participants

```
##
## Family: gaussian
## Link function: identity
##
## Formula:
## bisbas_ss_basm_rr_z ~ PDS_score + interview_age + bmi
##
## Parametric coefficients:
##           Estimate Std. Error t value Pr(>|t|)
## (Intercept)  0.1610747  0.2935925  0.549  0.5833
## PDS_score    0.0639298  0.0335433  1.906  0.0568 .
## interview_age -0.0015994  0.0024376  -0.656  0.5118
## bmi          0.0002617  0.0048322  0.054  0.9568
## ---
## Signif. codes:  0 '***' 0.001 '**' 0.01 '*' 0.05 '.' 0.1 ' ' 1
##
##
## R-sq.(adj) =  0.000769
## lmer.REML = 7939.1  Scale est. = 0.73357    n = 2867
```

```
##          stdcoef      stdse
## X(Intercept)  0.00000000 0.00000000
## XPDS_score   0.03672356 0.01926849
## Xinterview_age -0.01248455 0.01902746
## Xbmi         0.00104335 0.01926316
```

## 2.2 Model : Reaction Time ~ PDS

### Female participants

```
##
## Family: gaussian
## Link function: identity
##
## Formula:
## rt_diff_large_neutral_z ~ PDS_score + interview_age + bmi
##
## Parametric coefficients:
##          Estimate Std. Error t value Pr(>|t|)
## (Intercept) -0.6226269  0.3292373  -1.891  0.0587 .
## PDS_score    0.0210476  0.0296816   0.709  0.4783
## interview_age 0.0050633  0.0027659   1.831  0.0673 .
## bmi         0.0009066  0.0052428   0.173  0.8627
## ---
## Signif. codes:  0 '***' 0.001 '**' 0.01 '*' 0.05 '.' 0.1 ' ' 1
##
##
## R-sq.(adj) =  0.000899
## lmer.REML = 5989.8  Scale est. = 0.75476  n = 2217
```

```
##          stdcoef      stdse
## X(Intercept)  0.00000000 0.00000000
## XPDS_score    0.016206938 0.02285525
## Xinterview_age 0.040472732 0.02210845
## Xbmi         0.003813751 0.02205340
##
##
## Family: gaussian
## Link function: identity
##
## Formula:
## rt_diff_large_small_z ~ PDS_score + interview_age + bmi
##
## Parametric coefficients:
##          Estimate Std. Error t value Pr(>|t|)
## (Intercept) -0.569055  0.342373  -1.662  0.0966 .
## PDS_score   -0.001886  0.030923  -0.061  0.9514
## interview_age 0.004065  0.002877   1.413  0.1578
## bmi         0.005261  0.005438   0.967  0.3335
## ---
## Signif. codes:  0 '***' 0.001 '**' 0.01 '*' 0.05 '.' 0.1 ' ' 1
##
##
```

```
## R-sq.(adj) = 0.000148
## lmer.REML = 6142.5 Scale est. = 0.81938 n = 2217

##          stdcoef      stdse
## X(Intercept) 0.00000000 0.00000000
## XPDS_score  -0.001403263 0.02300601
## Xinterview_age 0.031394536 0.02222092
## Xbmi          0.021381007 0.02210234
```

## Male participants

```
##
## Family: gaussian
## Link function: identity
##
## Formula:
## rt_diff_large_neutral_z ~ PDS_score + interview_age + bmi
##
## Parametric coefficients:
##          Estimate Std. Error t value Pr(>|t|)
## (Intercept) -0.634098  0.311502  -2.036  0.0419 *
## PDS_score    -0.054779  0.036735  -1.491  0.1361
## interview_age 0.005409  0.002576   2.100  0.0358 *
## bmi          0.002275  0.005262   0.432  0.6655
## ---
## Signif. codes:  0 '***' 0.001 '**' 0.01 '*' 0.05 '.' 0.1 ' ' 1
##
##
## R-sq.(adj) = 0.00135
## lmer.REML = 6133.6 Scale est. = 0.84844 n = 2284

##          stdcoef      stdse
## X(Intercept) 0.00000000 0.00000000
## XPDS_score  -0.032175118 0.02157703
## Xinterview_age 0.044555302 0.02121420
## Xbmi          0.009273588 0.02144716

##
## Family: gaussian
## Link function: identity
##
## Formula:
## rt_diff_large_small_z ~ PDS_score + interview_age + bmi
##
## Parametric coefficients:
##          Estimate Std. Error t value Pr(>|t|)
## (Intercept)  0.0139388 0.3073470  0.045  0.964
## PDS_score    -0.0289614 0.0362562 -0.799  0.424
## interview_age -0.0005069 0.0025405 -0.200  0.842
## bmi          0.0037755 0.0051909  0.727  0.467
##
##
## R-sq.(adj) = -0.000858
## lmer.REML = 6078.1 Scale est. = 0.82862 n = 2284
```

```
##                stdcoef      stdse
## X(Intercept)    0.00000000 0.00000000
## XPDS_score     -0.017238738 0.02158082
## Xinterview_age -0.004231179 0.02120524
## Xbmi           0.015592939 0.02143895
```

## 2.3 Model: Caudate Anticipation ~ PDS

### Female participants

```
##
## Family: gaussian
## Link function: identity
##
## Formula:
## caudate_rvsn_ant_z ~ PDS_score + interview_age + bmi
##
## Parametric coefficients:
##              Estimate Std. Error t value Pr(>|t|)
## (Intercept) -0.315320  0.325732  -0.968  0.333
## PDS_score   -0.015660  0.029322  -0.534  0.593
## interview_age 0.003899  0.002741   1.423  0.155
## bmi         -0.007257  0.005322  -1.364  0.173
##
##
## R-sq.(adj) = 0.000795
## lmer.REML = 5366.4 Scale est. = 0.73411 n = 2051
```

```
##                stdcoef      stdse
## X(Intercept)    0.00000000 0.00000000
## XPDS_score     -0.01276227 0.02389702
## Xinterview_age  0.03283735 0.02308261
## Xbmi           -0.03139029 0.02302119
```

### Male participants

```
##
## Family: gaussian
## Link function: identity
##
## Formula:
## caudate_rvsn_ant_z ~ PDS_score + interview_age + bmi
##
## Parametric coefficients:
##              Estimate Std. Error t value Pr(>|t|)
## (Intercept) -0.340494  0.330330  -1.031  0.3028
## PDS_score    0.039484  0.039871   0.990  0.3221
## interview_age 0.004061  0.002723   1.491  0.1360
## bmi         -0.010783  0.005629  -1.916  0.0556 .
## ---
## Signif. codes:  0 '***' 0.001 '**' 0.01 '*' 0.05 '.' 0.1 ' ' 1
##
```



```
##
## R-sq.(adj) = 0.00121
## lmer.REML = 5432.7 Scale est. = 0.83878 n = 2027

##          stdcoef      stdse
## X(Intercept) 0.00000000 0.00000000
## XPDS_score   0.02261445 0.02283559
## Xinterview_age 0.03366237 0.02257299
## Xbmi         -0.04360563 0.02276427
```

## 2.4 Model B: Putamen Anticipation ~ PDS

### Female participants

```
##
## Family: gaussian
## Link function: identity
##
## Formula:
## putamen_rvsnt_ant_z ~ PDS_score + interview_age + bmi
##
## Parametric coefficients:
##          Estimate Std. Error t value Pr(>|t|)
## (Intercept) -0.423647  0.322762  -1.313  0.1895
## PDS_score    0.005043  0.029045   0.174  0.8622
## interview_age 0.004721  0.002715   1.739  0.0822 .
## bmi         -0.008698  0.005310  -1.638  0.1016
## ---
## Signif. codes:  0 '***' 0.001 '**' 0.01 '*' 0.05 '.' 0.1 ' ' 1
##
##
## R-sq.(adj) = 0.00141
## lmer.REML = 5332.1 Scale est. = 0.69631 n = 2051

##          stdcoef      stdse
## X(Intercept) 0.00000000 0.00000000
## XPDS_score   0.004151439 0.02390785
## Xinterview_age 0.040093886 0.02305580
## Xbmi         -0.037760930 0.02305285
```

### Male participants

```
##
## Family: gaussian
## Link function: identity
##
## Formula:
## putamen_rvsnt_ant_z ~ PDS_score + interview_age + bmi
##
## Parametric coefficients:
##          Estimate Std. Error t value Pr(>|t|)
## (Intercept) -0.2098831 0.3226638  -0.650  0.5155
```

```

## PDS_score      0.0009488  0.0389081  0.024  0.9805
## interview_age  0.0032872  0.0026568  1.237  0.2161
## bmi           -0.0090817  0.0054930  -1.653  0.0984 .
## ---
## Signif. codes:  0 '***' 0.001 '**' 0.01 '*' 0.05 '.' 0.1 ' ' 1
##
##
## R-sq.(adj) = 0.000503
## lmer.REML = 5344.5  Scale est. = 0.66471  n = 2031

##                stdcoef      stdse
## X(Intercept)    0.000000000  0.00000000
## XPDS_score      0.0005572441  0.02285242
## Xinterview_age  0.0278660679  0.02252240
## Xbmi            -0.0376742740  0.02278716

```

## 2.5 Model: Accumbens Anticipation ~ PDS

### Female participants

```

##
## Family: gaussian
## Link function: identity
##
## Formula:
## accumbens_rvsnt_ant_z ~ PDS_score + interview_age + bmi
##
## Parametric coefficients:
##              Estimate Std. Error t value Pr(>|t|)
## (Intercept)  0.2093731  0.2557352   0.819   0.413
## PDS_score    -0.0195109  0.0229520  -0.850   0.395
## interview_age -0.0005292  0.0021487  -0.246   0.805
## bmi         -0.0057282  0.0042144  -1.359   0.174
##
##
## R-sq.(adj) = 0.000377
## lmer.REML = 4379.1  Scale est. = 0.47334  n = 2046

##                stdcoef      stdse
## X(Intercept)    0.000000000  0.00000000
## XPDS_score      -0.020210714  0.02377521
## Xinterview_age  -0.005660828  0.02298374
## Xbmi            -0.031273018  0.02300827

```

### Male participants

```

##
## Family: gaussian
## Link function: identity
##
## Formula:
## accumbens_rvsnt_ant_z ~ PDS_score + interview_age + bmi

```

```
##
## Parametric coefficients:
##           Estimate Std. Error t value Pr(>|t|)
## (Intercept)  0.194704  0.259591  0.750  0.453
## PDS_score    0.019946  0.031125  0.641  0.522
## interview_age -0.001337  0.002139 -0.625  0.532
## bmi          -0.003175  0.004420 -0.718  0.473
##
##
## R-sq.(adj) = -0.000882
## lmer.REML = 4464.8  Scale est. = 0.44239  n = 2028
```

```
##           stdcoef      stdse
## X(Intercept)  0.00000000 0.00000000
## XPDS_score    0.01467156 0.02289481
## Xinterview_age -0.01409280 0.02253948
## Xbmi          -0.01639603 0.02282584
```

## 2.6 Model: Caudate Feedback ~ PDS

### Female participants

```
##
## Family: gaussian
## Link function: identity
##
## Formula:
## caudate_posvsneg_feedback_z ~ PDS_score + interview_age + bmi
##
## Parametric coefficients:
##           Estimate Std. Error t value Pr(>|t|)
## (Intercept) -4.561e-02  3.198e-01 -0.143  0.887
## PDS_score    3.641e-02  2.879e-02  1.264  0.206
## interview_age -2.853e-04  2.689e-03 -0.106  0.916
## bmi          5.477e-05  5.231e-03  0.010  0.992
##
##
## R-sq.(adj) = -0.000764
## lmer.REML = 5269.5  Scale est. = 0.63123  n = 2048
```

```
##           stdcoef      stdse
## X(Intercept)  0.000000000 0.00000000
## XPDS_score    0.0303435214 0.02399714
## Xinterview_age -0.0024540261 0.02313015
## Xbmi          0.0002419529 0.02311001
```

### Male participants

```
##
## Family: gaussian
## Link function: identity
##
```

```

## Formula:
## caudate_posvsneg_feedback_z ~ PDS_score + interview_age + bmi
##
## Parametric coefficients:
##           Estimate Std. Error t value Pr(>|t|)
## (Intercept) -4.379e-02 3.258e-01 -0.134  0.893
## PDS_score   -2.264e-03 3.913e-02 -0.058  0.954
## interview_age 2.117e-06 2.682e-03  0.001  0.999
## bmi         3.064e-03 5.523e-03  0.555  0.579
##
##
## R-sq.(adj) = -0.00135
## lmer.REML = 5399.9  Scale est. = 0.82349  n = 2032

##           stdcoef      stdse
## X(Intercept)  0.000000e+00 0.00000000
## XPDS_score   -1.319118e-03 0.02280107
## Xinterview_age 1.775226e-05 0.02248674
## Xbmi         1.258849e-02 0.02269318

```

## 2.7 Model: Putamen Feedback ~ PDS

### Female participants

```

##
## Family: gaussian
## Link function: identity
##
## Formula:
## putamen_posvsneg_feedback_z ~ PDS_score + interview_age + bmi
##
## Parametric coefficients:
##           Estimate Std. Error t value Pr(>|t|)
## (Intercept)  0.0988455 0.3149600  0.314  0.754
## PDS_score    0.0336585 0.0283956  1.185  0.236
## interview_age -0.0013557 0.0026478 -0.512  0.609
## bmi         -0.0001433 0.0051534 -0.028  0.978
##
##
## R-sq.(adj) = -0.00083
## lmer.REML = 5203.2  Scale est. = 0.70883  n = 2048

##           stdcoef      stdse
## X(Intercept)  0.0000000000 0.00000000
## XPDS_score    0.0284227111 0.02397843
## Xinterview_age -0.0118501992 0.02314501
## Xbmi         -0.0006406659 0.02304141

```

### Male participants

```

##
## Family: gaussian

```

```

## Link function: identity
##
## Formula:
## putamen_posvsneg_feedback_z ~ PDS_score + interview_age + bmi
##
## Parametric coefficients:
##           Estimate Std. Error t value Pr(>|t|)
## (Intercept)  0.214649  0.323425  0.664  0.507
## PDS_score    0.024747  0.038699  0.639  0.523
## interview_age -0.002826  0.002663 -1.061  0.289
## bmi          0.006628  0.005479  1.210  0.227
##
##
## R-sq.(adj) = -0.000494
## lmer.REML = 5363.4 Scale est. = 0.79657 n = 2037

##           stdcoef      stdse
## X(Intercept)  0.00000000 0.00000000
## XPDS_score    0.01457976 0.02280021
## Xinterview_age -0.02392731 0.02254492
## Xbmi          0.02751314 0.02274540

```

## 2.8 Model: Accumbens Feedback ~ PDS

### Female participants

```

##
## Family: gaussian
## Link function: identity
##
## Formula:
## accumbens_posvsneg_feedback_z ~ PDS_score + interview_age + bmi
##
## Parametric coefficients:
##           Estimate Std. Error t value Pr(>|t|)
## (Intercept) -0.3660146  0.2503784 -1.462  0.144
## PDS_score    0.0134280  0.0225898  0.594  0.552
## interview_age 0.0025873  0.0021072  1.228  0.220
## bmi          0.0008257  0.0040922  0.202  0.840
##
##
## R-sq.(adj) = 6.88e-05
## lmer.REML = 4268.4 Scale est. = 0.43456 n = 2047

##           stdcoef      stdse
## X(Intercept)  0.00000000 0.00000000
## XPDS_score    0.014258065 0.02398625
## Xinterview_age 0.028418953 0.02314593
## Xbmi          0.004652283 0.02305739

```

### Male participants

```
##
```

```

## Family: gaussian
## Link function: identity
##
## Formula:
## accumbens_posvsneg_feedback_z ~ PDS_score + interview_age + bmi
##
## Parametric coefficients:
##           Estimate Std. Error t value Pr(>|t|)
## (Intercept) -0.0873822  0.2649875  -0.330   0.742
## PDS_score   -0.0412568  0.0317171  -1.301   0.193
## interview_age  0.0003722  0.0021805   0.171   0.864
## bmi          0.0060185  0.0045187   1.332   0.183
##
##
## R-sq.(adj) = -0.000298
## lmer.REML = 4527  Scale est. = 0.44187  n = 2030

##           stdcoef      stdse
## X(Intercept)  0.000000000 0.00000000
## XPDS_score   -0.029745998 0.02286789
## Xinterview_age 0.003848071 0.02254625
## Xbmi          0.030395062 0.02282045

```

## 2.9 Model: OFC Anticipation ~ PDS

### Female participants

```

##
## Family: gaussian
## Link function: identity
##
## Formula:
## lOFC_rvsnt_ant_z ~ PDS_score + interview_age + bmi
##
## Parametric coefficients:
##           Estimate Std. Error t value Pr(>|t|)
## (Intercept)  2.997e-02  2.044e-01   0.147   0.883
## PDS_score   -1.225e-02  1.851e-02  -0.662   0.508
## interview_age -1.434e-05  1.719e-03  -0.008   0.993
## bmi         -2.967e-04  3.336e-03  -0.089   0.929
##
##
## R-sq.(adj) = -0.00118
## lmer.REML = 3424.1  Scale est. = 0.30859  n = 2038

##           stdcoef      stdse
## X(Intercept)  0.000000000 0.00000000
## XPDS_score   -0.0158778818 0.02399684
## Xinterview_age -0.0001933972 0.02318168
## Xbmi         -0.0020531943 0.02308835

##

```

```

## Family: gaussian
## Link function: identity
##
## Formula:
## mOFC_rvs_n_ant_z ~ PDS_score + interview_age + bmi
##
## Parametric coefficients:
##           Estimate Std. Error t value Pr(>|t|)
## (Intercept)  0.1633755  0.2378443   0.687   0.4922
## PDS_score    -0.0505856  0.0214306  -2.360   0.0183 *
## interview_age -0.0006933  0.0020002  -0.347   0.7289
## bmi          -0.0003504  0.0038820  -0.090   0.9281
## ---
## Signif. codes:  0 '***' 0.001 '**' 0.01 '*' 0.05 '.' 0.1 ' ' 1
##
##
## R-sq.(adj) =  0.00184
## lmer.REML = 4040.7  Scale est. = 0.41739  n = 2039

##           stdcoef      stdse
## X(Intercept)  0.00000000 0.00000000
## XPDS_score    -0.056533996 0.02395062
## Xinterview_age -0.008015332 0.02312355
## Xbmi          -0.002080659 0.02305251

```

## Male participants

```

##
## Family: gaussian
## Link function: identity
##
## Formula:
## lOFC_rvs_n_ant_z ~ PDS_score + interview_age + bmi
##
## Parametric coefficients:
##           Estimate Std. Error t value Pr(>|t|)
## (Intercept) -0.364481  0.223289  -1.632   0.1028
## PDS_score    0.028848  0.027119   1.064   0.2876
## interview_age 0.003064  0.001839   1.666   0.0959 .
## bmi         -0.004122  0.003792  -1.087   0.2772
## ---
## Signif. codes:  0 '***' 0.001 '**' 0.01 '*' 0.05 '.' 0.1 ' ' 1
##
##
## R-sq.(adj) =  0.000869
## lmer.REML = 3815.7  Scale est. = 0.38049  n = 2018

##           stdcoef      stdse
## X(Intercept)  0.00000000 0.00000000
## XPDS_score    0.02436537 0.02290482
## Xinterview_age 0.03767736 0.02262065
## Xbmi          -0.02482405 0.02283966

```

```

##
## Family: gaussian
## Link function: identity
##
## Formula:
## mOFC_rvsn_ant_z ~ PDS_score + interview_age + bmi
##
## Parametric coefficients:
##           Estimate Std. Error t value Pr(>|t|)
## (Intercept) -0.1620470  0.2550107  -0.635  0.5252
## PDS_score    0.0556011  0.0308747   1.801  0.0719 .
## interview_age 0.0008762  0.0020992   0.417  0.6764
## bmi          -0.0023951  0.0043097  -0.556  0.5784
## ---
## Signif. codes:  0 '***' 0.001 '**' 0.01 '*' 0.05 '.' 0.1 ' ' 1
##
##
## R-sq.(adj) = 0.000338
## lmer.REML = 4381.8  Scale est. = 0.5034  n = 2024

##           stdcoef      stdse
## X(Intercept)  0.000000000 0.00000000
## XPDS_score    0.041098168 0.02282133
## Xinterview_age 0.009380096 0.02247257
## Xbmi          -0.012611190 0.02269188

```

## 2.10 Model: OFC Feedback ~ PDS

### Female participants

```

##
## Family: gaussian
## Link function: identity
##
## Formula:
## lOFC_posvsneg_feedback_z ~ PDS_score + interview_age + bmi
##
## Parametric coefficients:
##           Estimate Std. Error t value Pr(>|t|)
## (Intercept)  5.939e-02  1.854e-01  0.320  0.749
## PDS_score    4.868e-03  1.674e-02  0.291  0.771
## interview_age -8.429e-04  1.561e-03  -0.540  0.589
## bmi          7.308e-05  3.024e-03  0.024  0.981
##
##
## R-sq.(adj) = -0.00137
## lmer.REML = 3045.9  Scale est. = 0.2541  n = 2048

##           stdcoef      stdse
## X(Intercept)  0.000000000 0.00000000
## XPDS_score    0.006971117 0.02397655
## Xinterview_age -0.012506084 0.02316288
## Xbmi          0.000556958 0.02304377

```



```

##
## Family: gaussian
## Link function: identity
##
## Formula:
## mOFC_posvsneg_feedback_z ~ PDS_score + interview_age + bmi
##
## Parametric coefficients:
##           Estimate Std. Error t value Pr(>|t|)
## (Intercept)  0.0262328  0.2188123   0.120   0.905
## PDS_score    0.0025914  0.0197740   0.131   0.896
## interview_age -0.0001621  0.0018415  -0.088   0.930
## bmi         -0.0020736  0.0035868  -0.578   0.563
##
##
## R-sq.(adj) = -0.00129
## lmer.REML = 3754.4  Scale est. = 0.33097  n = 2051

##           stdcoef      stdse
## X(Intercept)  0.000000000  0.000000000
## XPDS_score    0.003121964  0.02382272
## Xinterview_age -0.002026504  0.02302188
## Xbmi          -0.013310786  0.02302420

```

## Male participants

```

##
## Family: gaussian
## Link function: identity
##
## Formula:
## lOFC_posvsneg_feedback_z ~ PDS_score + interview_age + bmi
##
## Parametric coefficients:
##           Estimate Std. Error t value Pr(>|t|)
## (Intercept) -0.157779  0.196239  -0.804   0.421
## PDS_score    -0.020718  0.023717  -0.874   0.382
## interview_age  0.001151  0.001614   0.713   0.476
## bmi          0.002926  0.003342   0.876   0.381
##
##
## R-sq.(adj) = -0.000642
## lmer.REML = 3299.1  Scale est. = 0.24695  n = 2016

##           stdcoef      stdse
## X(Intercept)  0.000000000  0.000000000
## XPDS_score    -0.02004021  0.02294089
## Xinterview_age  0.01609524  0.02255933
## Xbmi          0.01999848  0.02284172

```

```

##
## Family: gaussian
## Link function: identity

```

```

##
## Formula:
## mOFC_posvsneg_feedback_z ~ PDS_score + interview_age + bmi
##
## Parametric coefficients:
##           Estimate Std. Error t value Pr(>|t|)
## (Intercept) -0.0698922  0.2328640  -0.300   0.764
## PDS_score    -0.0252354  0.0282122  -0.894   0.371
## interview_age  0.0007394  0.0019161   0.386   0.700
## bmi           0.0023849  0.0039657   0.601   0.548
##
##
## R-sq.(adj) = -0.000915
## lmer.REML = 4014.8  Scale est. = 0.36025  n = 2025

##           stdcoef      stdse
## X(Intercept)    0.000000000 0.000000000
## XPDS_score     -0.020467817 0.02288231
## Xinterview_age  0.008694975 0.02253299
## Xbmi            0.013711233 0.02279956

```

## 2.11 Model: Caudate Anticipation ~ Testosterone

### Female participants

```

## Warning: Some predictor variables are on very different scales: consider
## rescaling

##
## Family: gaussian
## Link function: identity
##
## Formula:
## caudate_rvsnt_ant_z ~ hormone_scr_ert_mean + hormone_sal_end_min_since_midnight +
##   interview_age + MRI_minus_hormone_date_time + bmi
##
## Parametric coefficients:
##           Estimate Std. Error t value Pr(>|t|)
## (Intercept) -2.508e-01  3.565e-01  -0.704   0.482
## hormone_scr_ert_mean -1.281e-03  1.292e-03  -0.992   0.321
## hormone_sal_end_min_since_midnight -1.352e-04  1.239e-04  -1.091   0.275
## interview_age  4.229e-03  2.828e-03   1.495   0.135
## MRI_minus_hormone_date_time  1.061e-06  2.635e-06   0.403   0.687
## bmi           -5.840e-03  5.562e-03  -1.050   0.294
##
##
## R-sq.(adj) =  0.000508
## lmer.REML = 4903.7  Scale est. = 0.74968  n = 1859

##           stdcoef      stdse
## X(Intercept)    0.000000000 0.000000000
## Xhormone_scr_ert_mean -0.024011831 0.02421399

```

```
## Xhormone_sal_end_min_since_midnight -0.026693155 0.02446015
## Xinterview_age 0.035730321 0.02389359
## XMRI_minus_hormone_date_time 0.009612325 0.02386402
## Xbmi -0.025000223 0.02380805
```

### Male participants

```
## Warning: Some predictor variables are on very different scales: consider
## rescaling
```

```
##
## Family: gaussian
## Link function: identity
##
## Formula:
## caudate_rvsn_ant_z ~ hormone_scr_ert_mean + hormone_sal_end_min_since_midnight +
##   interview_age + MRI_minus_hormone_date_time + bmi
##
## Parametric coefficients:
##
##           Estimate Std. Error t value Pr(>|t|)
## (Intercept) -1.771e-01 3.551e-01 -0.499 0.6182
## hormone_scr_ert_mean -2.009e-04 1.495e-03 -0.134 0.8931
## hormone_sal_end_min_since_midnight 1.413e-04 1.258e-04 1.123 0.2615
## interview_age 2.394e-03 2.803e-03 0.854 0.3931
## MRI_minus_hormone_date_time 4.211e-07 2.890e-06 0.146 0.8842
## bmi -1.128e-02 5.722e-03 -1.971 0.0489 *
## ---
## Signif. codes:  0 '***' 0.001 '**' 0.01 '*' 0.05 '.' 0.1 ' ' 1
##
## R-sq.(adj) = 0.00076
## lmer.REML = 5003.1 Scale est. = 0.82633 n = 1861
```

```
##           stdcoef      stdse
## X(Intercept) 0.000000000 0.00000000
## Xhormone_scr_ert_mean -0.003222334 0.02397052
## Xhormone_sal_end_min_since_midnight 0.027777643 0.02472956
## Xinterview_age 0.020144337 0.02358050
## XMRI_minus_hormone_date_time 0.003514959 0.02412369
## Xbmi -0.046611973 0.02365409
```

## 2.12 Model B: Putamen Anticipation ~ Testosterone

### Female participants

```
## Warning: Some predictor variables are on very different scales: consider
## rescaling
```

```
##
## Family: gaussian
## Link function: identity
##
```

```

## Formula:
## putamen_rvsn_ant_z ~ hormone_scr_ert_mean + hormone_sal_end_min_since_midnight +
##   interview_age + MRI_minus_hormone_date_time + bmi
##
## Parametric coefficients:
##
##           Estimate Std. Error t value Pr(>|t|)
## (Intercept)      -2.657e-01  3.506e-01  -0.758   0.449
## hormone_scr_ert_mean      1.005e-04  1.273e-03   0.079   0.937
## hormone_sal_end_min_since_midnight -1.937e-04  1.215e-04  -1.593   0.111
## interview_age          4.141e-03  2.781e-03   1.489   0.137
## MRI_minus_hormone_date_time      1.282e-06  2.591e-06   0.495   0.621
## bmi                  -5.593e-03  5.504e-03  -1.016   0.310
##
##
## R-sq.(adj) =  0.000705
## lmer.REML = 4843.8  Scale est. = 0.64702  n = 1859

##           stdcoef      stdse
## X(Intercept)          0.000000000  0.000000000
## Xhormone_scr_ert_mean      0.001912854  0.02422436
## Xhormone_sal_end_min_since_midnight -0.038932176  0.02443491
## Xinterview_age          0.035546887  0.02387640
## XMRI_minus_hormone_date_time      0.011807851  0.02387406
## Xbmi                  -0.024240233  0.02385382

```

## Male participants

```

## Warning: Some predictor variables are on very different scales: consider
## rescaling

##
## Family: gaussian
## Link function: identity
##
## Formula:
## putamen_rvsn_ant_z ~ hormone_scr_ert_mean + hormone_sal_end_min_since_midnight +
##   interview_age + MRI_minus_hormone_date_time + bmi
##
## Parametric coefficients:
##
##           Estimate Std. Error t value Pr(>|t|)
## (Intercept)      -2.499e-01  3.510e-01  -0.712   0.477
## hormone_scr_ert_mean      -1.325e-03  1.479e-03  -0.896   0.370
## hormone_sal_end_min_since_midnight  1.920e-04  1.242e-04   1.546   0.122
## interview_age          2.994e-03  2.775e-03   1.079   0.281
## MRI_minus_hormone_date_time      7.879e-07  2.866e-06   0.275   0.783
## bmi                  -1.073e-02  5.679e-03  -1.890   0.059 .
## ---
## Signif. codes:  0 '***' 0.001 '**' 0.01 '*' 0.05 '.' 0.1 ' ' 1
##
##
## R-sq.(adj) =  0.00224
## lmer.REML = 4964.9  Scale est. = 0.62557  n = 1861

```

```

##                                stdcoef    stdse
## X(Intercept)                   0.000000000 0.000000000
## Xhormone_scr_ert_mean           -0.021466666 0.02395732
## Xhormone_sal_end_min_since_midnight 0.037998249 0.02457886
## Xinterview_age                  0.025375331 0.02352142
## XMRI_minus_hormone_date_time    0.006616824 0.02406615
## Xbmi                            -0.044735929 0.02367364

```

## 2.13 Model: Accumbens Anticipation ~ Testosterone

### Female participants

```

## Warning: Some predictor variables are on very different scales: consider
## rescaling

##
## Family: gaussian
## Link function: identity
##
## Formula:
## accumbens_rvsn_ant_z ~ hormone_scr_ert_mean + hormone_sal_end_min_since_midnight +
##   interview_age + MRI_minus_hormone_date_time + bmi
##
## Parametric coefficients:
##                                Estimate Std. Error t value Pr(>|t|)
## (Intercept)                   2.685e-01  2.796e-01   0.960   0.3369
## hormone_scr_ert_mean           1.317e-05  1.011e-03   0.013   0.9896
## hormone_sal_end_min_since_midnight -1.086e-04  9.423e-05  -1.152   0.2493
## interview_age                  -1.979e-04  2.214e-03  -0.089   0.9288
## MRI_minus_hormone_date_time    -2.295e-07  2.051e-06  -0.112   0.9109
## bmi                            -8.257e-03  4.398e-03  -1.878   0.0606 .
## ---
## Signif. codes:  0 '***' 0.001 '**' 0.01 '*' 0.05 '.' 0.1 ' ' 1
##
##
## R-sq.(adj) =  0.000136
## lmer.REML = 3998.4  Scale est. = 0.41352  n = 1853

##                                stdcoef    stdse
## X(Intercept)                   0.000000000 0.000000000
## Xhormone_scr_ert_mean           0.0003141855 0.02411402
## Xhormone_sal_end_min_since_midnight -0.0273686975 0.02374762
## Xinterview_age                  -0.0021284752 0.02381991
## XMRI_minus_hormone_date_time    -0.0026513982 0.02369330
## Xbmi                            -0.0446764288 0.02379433

```

### Male participants

```

## Warning: Some predictor variables are on very different scales: consider
## rescaling

##

```

```

## Family: gaussian
## Link function: identity
##
## Formula:
## accumbens_rvsn_ant_z ~ hormone_scr_ert_mean + hormone_sal_end_min_since_midnight +
##   interview_age + MRI_minus_hormone_date_time + bmi
##
## Parametric coefficients:
##
##           Estimate Std. Error t value Pr(>|t|)
## (Intercept)      2.093e-01  2.810e-01   0.745   0.457
## hormone_scr_ert_mean      9.080e-05  1.187e-03   0.076   0.939
## hormone_sal_end_min_since_midnight  7.517e-05  9.893e-05   0.760   0.447
## interview_age      -1.597e-03  2.219e-03  -0.720   0.472
## MRI_minus_hormone_date_time      -3.321e-06  2.337e-06  -1.421   0.156
## bmi                -3.338e-03  4.527e-03  -0.737   0.461
##
##
## R-sq.(adj) =  -0.000664
## lmer.REML =  4126  Scale est. = 0.44854  n = 1856
##
##           stdcoef      stdse
## X(Intercept)          0.000000000 0.000000000
## Xhormone_scr_ert_mean      0.001837754 0.02402567
## Xhormone_sal_end_min_since_midnight  0.018667848 0.02456777
## Xinterview_age          -0.016983118 0.02359567
## XMRI_minus_hormone_date_time      -0.034276041 0.02412604
## Xbmi                  -0.017497800 0.02373459

```

## 2.14 Model: Caudate Feedback ~ Testosterone

### Female participants

```

## Warning: Some predictor variables are on very different scales: consider
## rescaling
##
## Family: gaussian
## Link function: identity
##
## Formula:
## caudate_posvsneg_feedback_z ~ hormone_scr_ert_mean + hormone_sal_end_min_since_midnight +
##   interview_age + MRI_minus_hormone_date_time + bmi
##
## Parametric coefficients:
##
##           Estimate Std. Error t value Pr(>|t|)
## (Intercept)      6.533e-02  3.458e-01   0.189   0.8502
## hormone_scr_ert_mean      -3.724e-06  1.251e-03  -0.003   0.9976
## hormone_sal_end_min_since_midnight  -2.922e-04  1.211e-04  -2.413   0.0159 *
## interview_age      8.981e-04  2.742e-03   0.328   0.7433
## MRI_minus_hormone_date_time      -5.379e-07  2.551e-06  -0.211   0.8330
## bmi                2.408e-03  5.390e-03   0.447   0.6551
## ---
## Signif. codes:  0 '***' 0.001 '**' 0.01 '*' 0.05 '.' 0.1 ' ' 1

```

```
##
##
## R-sq.(adj) = 0.00178
## lmer.REML = 4764 Scale est. = 0.65794 n = 1854

##                stdcoef      stdse
## X(Intercept)      0.000000e+00 0.00000000
## Xhormone_scr_ert_mean      -7.226421e-05 0.02428754
## Xhormone_sal_end_min_since_midnight -5.972708e-02 0.02475515
## Xinterview_age      7.838678e-03 0.02393447
## XMRI_minus_hormone_date_time      -5.053207e-03 0.02396571
## Xbmi      1.065694e-02 0.02385575
```

## Male participants

```
## Warning: Some predictor variables are on very different scales: consider
## rescaling

##
## Family: gaussian
## Link function: identity
##
## Formula:
## caudate_posvsneg_feedback_z ~ hormone_scr_ert_mean + hormone_sal_end_min_since_midnight +
##   interview_age + MRI_minus_hormone_date_time + bmi
##
## Parametric coefficients:
##                Estimate Std. Error t value Pr(>|t|)
## (Intercept)      2.041e-01 3.529e-01  0.578  0.5631
## hormone_scr_ert_mean      -2.382e-03 1.475e-03 -1.615  0.1065
## hormone_sal_end_min_since_midnight -3.032e-04 1.211e-04 -2.504  0.0124 *
## interview_age      -1.343e-04 2.786e-03 -0.048  0.9616
## MRI_minus_hormone_date_time      3.233e-06 2.852e-06  1.134  0.2571
## bmi      6.259e-03 5.663e-03  1.105  0.2692
## ---
## Signif. codes:  0 '***' 0.001 '**' 0.01 '*' 0.05 '.' 0.1 ' ' 1
##
##
## R-sq.(adj) = 0.00255
## lmer.REML = 4992.8 Scale est. = 0.82384 n = 1862

##                stdcoef      stdse
## X(Intercept)      0.000000000 0.00000000
## Xhormone_scr_ert_mean      -0.038376921 0.02376535
## Xhormone_sal_end_min_since_midnight -0.059804205 0.02388165
## Xinterview_age      -0.001131791 0.02347490
## XMRI_minus_hormone_date_time      0.027095786 0.02390339
## Xbmi      0.025996053 0.02351956
```

## 2.15 Model: Putamen Feedback ~ Testosterone

### Female participants

```
## Warning: Some predictor variables are on very different scales: consider
## rescaling

##
## Family: gaussian
## Link function: identity
##
## Formula:
## putamen_posvsneg_feedback_z ~ hormone_scr_ert_mean + hormone_sal_end_min_since_midnight +
##   interview_age + MRI_minus_hormone_date_time + bmi
##
## Parametric coefficients:
##
##               Estimate Std. Error t value Pr(>|t|)
## (Intercept)    3.559e-01  3.399e-01   1.047   0.2952
## hormone_scr_ert_mean  1.859e-04  1.233e-03   0.151   0.8802
## hormone_sal_end_min_since_midnight -3.255e-04  1.212e-04  -2.686   0.0073 **
## interview_age    -1.146e-03  2.694e-03  -0.425   0.6705
## MRI_minus_hormone_date_time  3.695e-07  2.522e-06   0.146   0.8835
## bmi              1.078e-03  5.311e-03   0.203   0.8391
## ---
## Signif. codes:  0 '***' 0.001 '**' 0.01 '*' 0.05 '.' 0.1 ' ' 1
##
##
## R-sq.(adj) =  0.00203
## lmer.REML = 4709.2  Scale est. = 0.70478  n = 1857

##
##               stdcoef      stdse
## X(Intercept)    0.000000000 0.00000000
## Xhormone_scr_ert_mean  0.003654973 0.02423798
## Xhormone_sal_end_min_since_midnight -0.067547150 0.02515141
## Xinterview_age    -0.010166339 0.02389360
## XMRI_minus_hormone_date_time  0.003516761 0.02400598
## Xbmi              0.004831829 0.02379334
```

### Male participants

```
## Warning: Some predictor variables are on very different scales: consider
## rescaling

##
## Family: gaussian
## Link function: identity
##
## Formula:
## putamen_posvsneg_feedback_z ~ hormone_scr_ert_mean + hormone_sal_end_min_since_midnight +
##   interview_age + MRI_minus_hormone_date_time + bmi
##
## Parametric coefficients:
##
##               Estimate Std. Error t value Pr(>|t|)
```



```

## (Intercept)                3.879e-01  3.483e-01  1.114  0.2656
## hormone_scr_ert_mean       -2.813e-03  1.469e-03  -1.915  0.0557
## hormone_sal_end_min_since_midnight -1.857e-04  1.279e-04  -1.452  0.1466
## interview_age              -2.682e-03  2.751e-03  -0.975  0.3296
## MRI_minus_hormone_date_time  2.128e-06  2.844e-06  0.748  0.4543
## bmi                        9.945e-03  5.597e-03  1.777  0.0758
## ---
## Signif. codes:  0 '***' 0.001 '**' 0.01 '*' 0.05 '.' 0.1 ' ' 1
##
##
## R-sq.(adj) = 0.00194
## lmer.REML = 4936.9  Scale est. = 0.78616  n = 1866

##                stdcoef      stdse
## X(Intercept)    0.00000000 0.00000000
## Xhormone_scr_ert_mean -0.04602278 0.02403324
## Xhormone_sal_end_min_since_midnight -0.03714332 0.02557454
## Xinterview_age -0.02295388 0.02353925
## XMRI_minus_hormone_date_time  0.01809190 0.02417495
## Xbmi            0.04197442 0.02362293

```

## 2.16 Model: Accumbens Feedback ~ Testosterone

### Female participants

```

## Warning: Some predictor variables are on very different scales: consider
## rescaling

##
## Family: gaussian
## Link function: identity
##
## Formula:
## accumbens_posvsneg_feedback_z ~ hormone_scr_ert_mean + hormone_sal_end_min_since_midnight +
##   interview_age + MRI_minus_hormone_date_time + bmi
##
## Parametric coefficients:
##                Estimate Std. Error t value Pr(>|t|)
## (Intercept)    -3.594e-01  2.744e-01  -1.310  0.190
## hormone_scr_ert_mean -3.017e-04  9.935e-04  -0.304  0.761
## hormone_sal_end_min_since_midnight -8.185e-05  9.620e-05  -0.851  0.395
## interview_age      2.820e-03  2.174e-03  1.297  0.195
## MRI_minus_hormone_date_time  6.440e-07  2.024e-06  0.318  0.750
## bmi              4.567e-03  4.284e-03  1.066  0.286
##
##
## R-sq.(adj) = -0.000194
## lmer.REML = 3907.3  Scale est. = 0.43899  n = 1853

##                stdcoef      stdse
## X(Intercept)    0.00000000 0.00000000
## Xhormone_scr_ert_mean -0.007371565 0.02427177

```

```
## Xhormone_sal_end_min_since_midnight -0.021099616 0.02479750
## Xinterview_age 0.031051368 0.02393974
## XMRI_minus_hormone_date_time 0.007631662 0.02398740
## Xbmi 0.025452793 0.02387189
```

## Male participants

```
## Warning: Some predictor variables are on very different scales: consider
## rescaling
```

```
##
## Family: gaussian
## Link function: identity
##
## Formula:
## accumbens_posvsneg_feedback_z ~ hormone_scr_ert_mean + hormone_sal_end_min_since_midnight +
##   interview_age + MRI_minus_hormone_date_time + bmi
##
## Parametric coefficients:
##
##           Estimate Std. Error t value Pr(>|t|)
## (Intercept) 3.484e-02 2.855e-01 0.122 0.9029
## hormone_scr_ert_mean -1.970e-03 1.206e-03 -1.633 0.1026
## hormone_sal_end_min_since_midnight -1.261e-04 1.041e-04 -1.211 0.2259
## interview_age -1.692e-04 2.255e-03 -0.075 0.9402
## MRI_minus_hormone_date_time -2.119e-06 2.389e-06 -0.887 0.3754
## bmi 8.528e-03 4.620e-03 1.846 0.0651 .
## ---
## Signif. codes: 0 '***' 0.001 '**' 0.01 '*' 0.05 '.' 0.1 ' ' 1
##
## R-sq.(adj) = 0.00181
## lmer.REML = 4180.1 Scale est. = 0.49593 n = 1861
```

```
##           stdcoef      stdse
## X(Intercept) 0.00000000 0.00000000
## Xhormone_scr_ert_mean -0.03930039 0.02406188
## Xhormone_sal_end_min_since_midnight -0.03083466 0.02545299
## Xinterview_age -0.00176689 0.02355255
## XMRI_minus_hormone_date_time -0.02145408 0.02419669
## Xbmi 0.04371744 0.02368460
```

## 2.17 Model: OFC Anticipation ~ Testosterone

### Female participants

```
## Warning: Some predictor variables are on very different scales: consider
## rescaling
```

```
##
## Family: gaussian
## Link function: identity
##
```

```

## Formula:
## lOFC_rvsn_ant_z ~ hormone_scr_ert_mean + hormone_sal_end_min_since_midnight +
##   interview_age + MRI_minus_hormone_date_time + bmi
##
## Parametric coefficients:
##
##           Estimate Std. Error t value Pr(>|t|)
## (Intercept)      1.633e-01  2.223e-01   0.734  0.4628
## hormone_scr_ert_mean      1.662e-03  8.039e-04   2.067  0.0389 *
## hormone_sal_end_min_since_midnight -7.882e-05  7.681e-05  -1.026  0.3049
## interview_age      -1.223e-03  1.762e-03  -0.695  0.4875
## MRI_minus_hormone_date_time      -1.728e-06  1.636e-06  -1.056  0.2909
## bmi      -2.456e-04  3.464e-03  -0.071  0.9435
## ---
## Signif. codes:  0 '***' 0.001 '**' 0.01 '*' 0.05 '.' 0.1 ' ' 1
##
##
## R-sq.(adj) =  0.00119
## lmer.REML = 3120.1  Scale est. = 0.3033   n = 1846
##
##           stdcoef      stdse
## X(Intercept)      0.000000000 0.000000000
## Xhormone_scr_ert_mean      0.050102372 0.02424050
## Xhormone_sal_end_min_since_midnight -0.025100771 0.02446024
## Xinterview_age      -0.016634037 0.02395101
## XMRI_minus_hormone_date_time      -0.025260602 0.02391147
## Xbmi      -0.001690531 0.02383915
##
## Warning: Some predictor variables are on very different scales: consider
## rescaling
##
## Family: gaussian
## Link function: identity
##
## Formula:
## mOFC_rvsn_ant_z ~ hormone_scr_ert_mean + hormone_sal_end_min_since_midnight +
##   interview_age + MRI_minus_hormone_date_time + bmi
##
## Parametric coefficients:
##
##           Estimate Std. Error t value Pr(>|t|)
## (Intercept)      3.424e-01  2.608e-01   1.313  0.189
## hormone_scr_ert_mean      1.362e-03  9.417e-04   1.447  0.148
## hormone_sal_end_min_since_midnight -3.727e-05  9.118e-05  -0.409  0.683
## interview_age      -2.918e-03  2.067e-03  -1.411  0.158
## MRI_minus_hormone_date_time      5.643e-07  1.920e-06   0.294  0.769
## bmi      -1.155e-03  4.058e-03  -0.285  0.776
##
##
## R-sq.(adj) = -0.000928
## lmer.REML = 3700  Scale est. = 0.41462   n = 1847
##
##           stdcoef      stdse
## X(Intercept)      0.000000000 0.000000000

```

```
## Xhormone_scr_ert_mean          0.035151754 0.02430062
## Xhormone_sal_end_min_since_midnight -0.010139608 0.02480430
## Xinterview_age                -0.033873347 0.02400020
## XMRI_minus_hormone_date_time    0.007060139 0.02402451
## Xbmi                          -0.006802320 0.02388850
```

### Male participants

```
## Warning: Some predictor variables are on very different scales: consider
## rescaling
```

```
##
## Family: gaussian
## Link function: identity
##
## Formula:
## lOFC_rvs_n_ant_z ~ hormone_scr_ert_mean + hormone_sal_end_min_since_midnight +
##   interview_age + MRI_minus_hormone_date_time + bmi
##
## Parametric coefficients:
##
##           Estimate Std. Error t value Pr(>|t|)
## (Intercept)    -4.165e-01  2.415e-01  -1.725  0.0847 .
## hormone_scr_ert_mean    -1.104e-03  1.015e-03  -1.087  0.2772
## hormone_sal_end_min_since_midnight  1.147e-04  8.624e-05   1.330  0.1835
## interview_age         3.145e-03  1.908e-03   1.648  0.0995 .
## MRI_minus_hormone_date_time    -1.608e-06  2.023e-06  -0.795  0.4269
## bmi                -2.415e-03  3.888e-03  -0.621  0.5345
## ---
## Signif. codes:  0 '***' 0.001 '**' 0.01 '*' 0.05 '.' 0.1 ' ' 1
##
##
## R-sq.(adj) =  0.000887
## lmer.REML = 3541.2  Scale est. = 0.38017  n = 1849
##
##           stdcoef      stdse
## X(Intercept)          0.00000000 0.00000000
## Xhormone_scr_ert_mean -0.02613940 0.02404823
## Xhormone_sal_end_min_since_midnight  0.03313171 0.02490271
## Xinterview_age        0.03897972 0.02364949
## XMRI_minus_hormone_date_time    -0.01924497 0.02421929
## Xbmi                  -0.01474407 0.02373317
```

```
## Warning: Some predictor variables are on very different scales: consider
## rescaling
```

```
##
## Family: gaussian
## Link function: identity
##
## Formula:
## mOFC_rvs_n_ant_z ~ hormone_scr_ert_mean + hormone_sal_end_min_since_midnight +
##   interview_age + MRI_minus_hormone_date_time + bmi
```

```

##
## Parametric coefficients:
##
##           Estimate Std. Error t value Pr(>|t|)
## (Intercept)      -1.552e-01  2.757e-01  -0.563   0.574
## hormone_scr_ert_mean      -8.129e-05  1.153e-03  -0.071   0.944
## hormone_sal_end_min_since_midnight  1.211e-04  9.495e-05   1.276   0.202
## interview_age           5.885e-04  2.177e-03   0.270   0.787
## MRI_minus_hormone_date_time      -2.312e-06  2.286e-06  -1.011   0.312
## bmi                    -1.415e-03  4.413e-03  -0.321   0.748
##
##
## R-sq.(adj) =  -0.00146
## lmer.REML = 4044.7  Scale est. = 0.49948  n = 1853

##           stdcoef      stdse
## X(Intercept)           0.000000000  0.000000000
## Xhormone_scr_ert_mean    -0.001684069  0.02388205
## Xhormone_sal_end_min_since_midnight  0.030657472  0.02403170
## Xinterview_age           0.006372082  0.02357648
## XMRI_minus_hormone_date_time    -0.024329335  0.02405366
## Xbmi                    -0.007580023  0.02363578

```

## 2.18 Model: OFC Feedback ~ Testosterone

### Female participants

```

## Warning: Some predictor variables are on very different scales: consider
## rescaling

##
## Family: gaussian
## Link function: identity
##
## Formula:
## lOFC_posvsneg_feedback_z ~ hormone_scr_ert_mean + hormone_sal_end_min_since_midnight +
##   interview_age + MRI_minus_hormone_date_time + bmi
##
## Parametric coefficients:
##
##           Estimate Std. Error t value Pr(>|t|)
## (Intercept)       6.969e-02  1.983e-01   0.352   0.7252
## hormone_scr_ert_mean    1.333e-03  7.196e-04   1.853   0.0641
## hormone_sal_end_min_since_midnight  -6.895e-05  6.801e-05  -1.014   0.3108
## interview_age        -8.187e-04  1.574e-03  -0.520   0.6031
## MRI_minus_hormone_date_time    -2.228e-06  1.459e-06  -1.527   0.1269
## bmi                   9.254e-04  3.094e-03   0.299   0.7649
## ---
## Signif. codes:  0 '***' 0.001 '**' 0.01 '*' 0.05 '.' 0.1 ' ' 1
##
##
## R-sq.(adj) =  0.00207
## lmer.REML = 2726.7  Scale est. = 0.24409  n = 1853

##           stdcoef      stdse

```

```

## X(Intercept)                0.000000000 0.00000000
## Xhormone_scr_ert_mean        0.044737037 0.02414910
## Xhormone_sal_end_min_since_midnight -0.024487829 0.02415402
## Xinterview_age              -0.012409651 0.02385999
## XMRI_minus_hormone_date_time -0.036315732 0.02378273
## Xbmi                        0.007110948 0.02377586

## Warning: Some predictor variables are on very different scales: consider
## rescaling

##
## Family: gaussian
## Link function: identity
##
## Formula:
## mOFC_posvsneg_feedback_z ~ hormone_scr_ert_mean + hormone_sal_end_min_since_midnight +
##   interview_age + MRI_minus_hormone_date_time + bmi
##
## Parametric coefficients:
##               Estimate Std. Error t value Pr(>|t|)
## (Intercept)   -8.624e-02  2.381e-01  -0.362   0.717
## hormone_scr_ert_mean  1.328e-03  8.637e-04   1.538   0.124
## hormone_sal_end_min_since_midnight 1.808e-05  8.028e-05   0.225   0.822
## interview_age  1.853e-04  1.889e-03   0.098   0.922
## MRI_minus_hormone_date_time -1.567e-07  1.744e-06  -0.090   0.928
## bmi           -1.108e-03  3.718e-03  -0.298   0.766
##
##
## R-sq.(adj) =  -0.00132
## lmer.REML = 3423.2  Scale est. = 0.34969  n = 1857

##               stdcoef      stdse
## X(Intercept)   0.000000000 0.00000000
## Xhormone_scr_ert_mean  0.037044216 0.02408702
## Xhormone_sal_end_min_since_midnight 0.005335945 0.02369212
## Xinterview_age  0.002335142 0.02380627
## XMRI_minus_hormone_date_time -0.002123805 0.02364753
## Xbmi           -0.007076220 0.02374362

```

## Male participants

```

## Warning: Some predictor variables are on very different scales: consider
## rescaling

##
## Family: gaussian
## Link function: identity
##
## Formula:
## lOFC_posvsneg_feedback_z ~ hormone_scr_ert_mean + hormone_sal_end_min_since_midnight +
##   interview_age + MRI_minus_hormone_date_time + bmi
##

```

```

## Parametric coefficients:
##
##           Estimate Std. Error t value Pr(>|t|)
## (Intercept)      1.175e-02  2.134e-01   0.055  0.956
## hormone_scr_ert_mean -2.512e-04  8.921e-04  -0.282  0.778
## hormone_sal_end_min_since_midnight -1.517e-04  7.382e-05  -2.055  0.040 *
## interview_age      4.063e-04  1.685e-03   0.241  0.809
## MRI_minus_hormone_date_time  2.820e-06  1.730e-06   1.630  0.103
## bmi               3.248e-03  3.437e-03   0.945  0.345
## ---
## Signif. codes:  0 '***' 0.001 '**' 0.01 '*' 0.05 '.' 0.1 ' ' 1
##
##
## R-sq.(adj) =  0.00108
## lmer.REML = 3083.3  Scale est. = 0.26158  n = 1846

##
##           stdcoef      stdse
## X(Intercept)          0.00000000 0.00000000
## Xhormone_scr_ert_mean -0.006739477 0.02393281
## Xhormone_sal_end_min_since_midnight -0.049547081 0.02411355
## Xinterview_age        0.005693600 0.02360541
## XMRI_minus_hormone_date_time  0.039237357 0.02407878
## Xbmi                  0.022379157 0.02367673

## Warning: Some predictor variables are on very different scales: consider
## rescaling

##
## Family: gaussian
## Link function: identity
##
## Formula:
## mOFC_posvsneg_feedback_z ~ hormone_scr_ert_mean + hormone_sal_end_min_since_midnight +
##   interview_age + MRI_minus_hormone_date_time + bmi
##
## Parametric coefficients:
##
##           Estimate Std. Error t value Pr(>|t|)
## (Intercept)      1.131e-01  2.510e-01   0.451  0.6522
## hormone_scr_ert_mean -8.783e-04  1.051e-03  -0.836  0.4034
## hormone_sal_end_min_since_midnight -1.865e-04  8.712e-05  -2.140  0.0325 *
## interview_age      2.904e-04  1.982e-03   0.147  0.8835
## MRI_minus_hormone_date_time  4.651e-07  2.092e-06   0.222  0.8241
## bmi               2.485e-03  4.044e-03   0.615  0.5389
## ---
## Signif. codes:  0 '***' 0.001 '**' 0.01 '*' 0.05 '.' 0.1 ' ' 1
##
##
## R-sq.(adj) =  0.000314
## lmer.REML = 3699.9  Scale est. = 0.37065  n = 1852

##
##           stdcoef      stdse
## X(Intercept)          0.000000000 0.000000000
## Xhormone_scr_ert_mean -0.019991357 0.02392200
## Xhormone_sal_end_min_since_midnight -0.051719729 0.02416670

```

```
## Xinterview_age          0.003455419 0.02357937
## XMRI_minus_hormone_date_time 0.005350916 0.02407414
## Xbmi                    0.014540207 0.02365941
```

## 2.19 Model: MID Reaction Time ~ Testosterone

### Female participants

```
##
## Family: gaussian
## Link function: identity
##
## Formula:
## rt_diff_large_neutral_z ~ hormone_scr_ert_mean + hormone_sal_end_min_since_midnight +
##   interview_age + bmi
##
## Parametric coefficients:
##
##               Estimate Std. Error t value Pr(>|t|)
## (Intercept)   -5.564e-01 3.587e-01  -1.551   0.121
## hormone_scr_ert_mean -1.459e-03 1.316e-03  -1.109   0.267
## hormone_sal_end_min_since_midnight -9.983e-05 1.178e-04  -0.847   0.397
## interview_age    5.704e-03 2.844e-03   2.006   0.045 *
## bmi             2.045e-03 5.483e-03   0.373   0.709
## ---
## Signif. codes:  0 '***' 0.001 '**' 0.01 '*' 0.05 '.' 0.1 ' ' 1
##
##
## R-sq.(adj) = 0.000767
## lmer.REML = 5555.2  Scale est. = 0.74256  n = 2042

##               stdcoef      stdse
## X(Intercept)      0.000000000 0.00000000
## Xhormone_scr_ert_mean -0.025625598 0.02309860
## Xhormone_sal_end_min_since_midnight -0.018906431 0.02231432
## Xinterview_age      0.045434993 0.02265001
## Xbmi                0.008470944 0.02271608

##
## Family: gaussian
## Link function: identity
##
## Formula:
## rt_diff_large_small_z ~ hormone_scr_ert_mean + hormone_sal_end_min_since_midnight +
##   interview_age + bmi
##
## Parametric coefficients:
##
##               Estimate Std. Error t value Pr(>|t|)
## (Intercept)   -5.932e-01 3.726e-01  -1.592   0.112
## hormone_scr_ert_mean -1.456e-03 1.369e-03  -1.064   0.287
## hormone_sal_end_min_since_midnight 3.826e-05 1.251e-04   0.306   0.760
## interview_age    4.125e-03 2.955e-03   1.396   0.163
## bmi             7.293e-03 5.690e-03   1.282   0.200
##
```



```
##
## R-sq.(adj) = 6.26e-05
## lmer.REML = 5698.5 Scale est. = 0.83135 n = 2042
```

```
##          stdcoef      stdse
## X(Intercept)      0.00000000 0.00000000
## Xhormone_scr_ert_mean -0.024701741 0.02321250
## Xhormone_sal_end_min_since_midnight 0.006999856 0.02289198
## Xinterview_age      0.031737930 0.02273792
## Xbmi                0.029186060 0.02277121
```

### Male participants

```
##
## Family: gaussian
## Link function: identity
##
## Formula:
## rt_diff_large_neutral_z ~ hormone_scr_ert_mean + hormone_sal_end_min_since_midnight +
##   interview_age + bmi
##
```

```
## Parametric coefficients:
##          Estimate Std. Error t value Pr(>|t|)
## (Intercept)      -0.6540210  0.3345588  -1.955  0.0507 .
## hormone_scr_ert_mean -0.0007424  0.0014015  -0.530  0.5963
## hormone_sal_end_min_since_midnight 0.0001120  0.0001151   0.973  0.3305
## interview_age      0.0046631  0.0026631   1.751  0.0801 .
## bmi                0.0008948  0.0053748   0.166  0.8678
```

```
## ---
## Signif. codes:  0 '***' 0.001 '**' 0.01 '*' 0.05 '.' 0.1 ' ' 1
```

```
##
## R-sq.(adj) = 1.81e-05
## lmer.REML = 5740.5 Scale est. = 0.8481 n = 2128
```

```
##          stdcoef      stdse
## X(Intercept)      0.00000000 0.00000000
## Xhormone_scr_ert_mean -0.011853868 0.02237617
## Xhormone_sal_end_min_since_midnight 0.021813886 0.02241059
## Xinterview_age      0.038658848 0.02207794
## Xbmi                0.003681314 0.02211377
```

```
##
## Family: gaussian
## Link function: identity
##
## Formula:
## rt_diff_large_small_z ~ hormone_scr_ert_mean + hormone_sal_end_min_since_midnight +
##   interview_age + bmi
##
```

```
## Parametric coefficients:
##          Estimate Std. Error t value Pr(>|t|)
## (Intercept)      -4.621e-02  3.308e-01  -0.140  0.889
```

```

## hormone_scr_ert_mean          -1.401e-03  1.381e-03  -1.015   0.310
## hormone_sal_end_min_since_midnight -6.495e-06  1.110e-04  -0.059   0.953
## interview_age                  2.143e-04  2.633e-03   0.081   0.935
## bmi                            2.723e-03  5.310e-03   0.513   0.608
##
##
## R-sq.(adj) = -0.00133
## lmer.REML = 5704.9  Scale est. = 0.83586  n = 2128

##                stdcoef      stdse
## X(Intercept)      0.00000000  0.00000000
## Xhormone_scr_ert_mean -0.022576299  0.02225011
## Xhormone_sal_end_min_since_midnight -0.001276304  0.02181536
## Xinterview_age      0.001793171  0.02203032
## Xbmi                0.011308848  0.02204872

```

## 2.20 Model: BIS-BAS-RR ~ Testosterone

### Female participants

```

##
## Family: gaussian
## Link function: identity
##
## Formula:
## bisbas_ss_basm_rr_z ~ hormone_scr_ert_mean + hormone_sal_end_min_since_midnight +
##   interview_age + bmi
##
## Parametric coefficients:
##                Estimate Std. Error t value Pr(>|t|)
## (Intercept)      -0.2620702  0.3517366  -0.745  0.456298
## hormone_scr_ert_mean -0.0002111  0.0012958  -0.163  0.870628
## hormone_sal_end_min_since_midnight  0.0004106  0.0001222   3.359  0.000793 ***
## interview_age      -0.0036414  0.0027825  -1.309  0.190754
## bmi                0.0180281  0.0053584   3.364  0.000779 ***
## ---
## Signif. codes:  0 '***' 0.001 '**' 0.01 '*' 0.05 '.' 0.1 ' ' 1
##
##
## R-sq.(adj) = 0.0126
## lmer.REML = 6907.2  Scale est. = 0.79616  n = 2435

##                stdcoef      stdse
## X(Intercept)      0.00000000  0.00000000
## Xhormone_scr_ert_mean -0.003462435  0.02125782
## Xhormone_sal_end_min_since_midnight  0.072805079  0.02167162
## Xinterview_age      -0.027200344  0.02078397
## Xbmi                0.069923420  0.02078308

```

### Male participants

```
##
```

```

## Family: gaussian
## Link function: identity
##
## Formula:
## bisbas_ss_basm_rr_z ~ hormone_scr_ert_mean + hormone_sal_end_min_since_midnight +
##   interview_age + bmi
##
## Parametric coefficients:
##
##           Estimate Std. Error t value Pr(>|t|)
## (Intercept) -0.0560894  0.3154876  -0.178  0.8589
## hormone_scr_ert_mean -0.0022606  0.0013147  -1.719  0.0857
## hormone_sal_end_min_since_midnight 0.0001184  0.0001132   1.045  0.2960
## interview_age 0.0004637  0.0025160   0.184  0.8538
## bmi 0.0028392  0.0049884   0.569  0.5693
## ---
## Signif. codes:  0 '***' 0.001 '**' 0.01 '*' 0.05 '.' 0.1 ' ' 1
##
##
## R-sq.(adj) = -0.000235
## lmer.REML = 7386.9  Scale est. = 0.74108  n = 2660

##
##           stdcoef      stdse
## X(Intercept) 0.00000000 0.00000000
## Xhormone_scr_ert_mean -0.034717343 0.02019126
## Xhormone_sal_end_min_since_midnight 0.022113435 0.02115513
## Xinterview_age 0.003645394 0.01977897
## Xbmi 0.011321096 0.01989058

```

### 3—Internalizing~Reward—

#### 3.1 Model: CBCL internalizing factor ~ Nucleus Accumbens activity (anticipation stage)

##### Female participants

```
##
## Family: gaussian
## Link function: identity
##
## Formula:
## cbcl_scr_syn_internal_r ~ accumbens_rvsn_ant_z + interview_age
##
## Parametric coefficients:
##               Estimate Std. Error t value Pr(>|t|)
## (Intercept)    0.93807    1.89253   0.496  0.6202
## accumbens_rvsn_ant_z -0.25017    0.16587  -1.508  0.1317
## interview_age    0.03348    0.01579   2.120  0.0341 *
## ---
## Signif. codes:  0 '***' 0.001 '**' 0.01 '*' 0.05 '.' 0.1 ' ' 1
##
##
## R-sq.(adj) =  0.000946
## lmer.REML = 12780  Scale est. = 15.797    n = 2065

##               stdcoef      stdse
## X(Intercept)    0.00000000 0.00000000
## Xaccumbens_rvsn_ant_z -0.03253184 0.02156971
## Xinterview_age    0.04644300 0.02190347
```

##### Male participants

```
##
## Family: gaussian
## Link function: identity
##
## Formula:
## cbcl_scr_syn_internal_r ~ accumbens_rvsn_ant_z + interview_age
##
## Parametric coefficients:
##               Estimate Std. Error t value Pr(>|t|)
## (Intercept)    2.81159    1.92279   1.462  0.144
## accumbens_rvsn_ant_z 0.03617    0.16810   0.215  0.830
## interview_age    0.01815    0.01601   1.134  0.257
##
##
## R-sq.(adj) = -0.00128
## lmer.REML = 12801  Scale est. = 14.906    n = 2046

##               stdcoef      stdse
## X(Intercept)    0.00000000 0.00000000
```

```
## Xaccumbens_rvsn_ant_z 0.004671257 0.02171120
## Xinterview_age      0.024747561 0.02183056
```

### 3.2 Model: CBCL internalizing factor ~ Caudate activity (anticipation stage)

#### Female participants

```
##
## Family: gaussian
## Link function: identity
##
## Formula:
## cbcl_scr_syn_internal_r ~ caudate_rvsn_ant_z + interview_age
##
## Parametric coefficients:
##           Estimate Std. Error t value Pr(>|t|)
## (Intercept)      1.23747    1.89544   0.653   0.5139
## caudate_rvsn_ant_z 0.03828    0.13153   0.291   0.7710
## interview_age     0.03104    0.01581   1.963   0.0498 *
## ---
## Signif. codes:  0 '***' 0.001 '**' 0.01 '*' 0.05 '.' 0.1 ' ' 1
##
##
## R-sq.(adj) = -0.000229
## lmer.REML = 12819  Scale est. = 16.059    n = 2069

##           stdcoef      stdse
## X(Intercept)      0.000000000 0.000000000
## Xcaudate_rvsn_ant_z 0.006289614 0.02160995
## Xinterview_age    0.042973215 0.02189105
```

#### Male participants

```
##
## Family: gaussian
## Link function: identity
##
## Formula:
## cbcl_scr_syn_internal_r ~ caudate_rvsn_ant_z + interview_age
##
## Parametric coefficients:
##           Estimate Std. Error t value Pr(>|t|)
## (Intercept)      2.82781    1.92247   1.471   0.141
## caudate_rvsn_ant_z 0.17149    0.13191   1.300   0.194
## interview_age     0.01835    0.01602   1.145   0.252
##
##
## R-sq.(adj) = -0.000683
## lmer.REML = 12841  Scale est. = 14.03    n = 2051

##           stdcoef      stdse
## X(Intercept)      0.000000000 0.000000000
```

```
## Xcaudate_rvsn_ant_z 0.02799388 0.02153345
## Xinterview_age      0.02494894 0.02178028
```

### 3.3 Model: CBCL internalizing factor ~ Putamen activity (anticipation stage)

#### Female participants

```
##
## Family: gaussian
## Link function: identity
##
## Formula:
## cbcl_scr_syn_internal_r ~ putamen_rvsn_ant_z + interview_age
##
## Parametric coefficients:
##           Estimate Std. Error t value Pr(>|t|)
## (Intercept)  1.055560  1.894179   0.557  0.5774
## putamen_rvsn_ant_z 0.002893  0.132368   0.022  0.9826
## interview_age  0.032556  0.015806   2.060  0.0395 *
## ---
## Signif. codes:  0 '***' 0.001 '**' 0.01 '*' 0.05 '.' 0.1 ' ' 1
##
##
## R-sq.(adj) = -0.000189
## lmer.REML = 12818  Scale est. = 15.798  n = 2069

##           stdcoef      stdse
## X(Intercept)  0.0000000000 0.00000000
## Xputamen_rvsn_ant_z 0.0004723149 0.02160736
## Xinterview_age  0.0450895285 0.02189021
```

#### Male participants

```
##
## Family: gaussian
## Link function: identity
##
## Formula:
## cbcl_scr_syn_internal_r ~ putamen_rvsn_ant_z + interview_age
##
## Parametric coefficients:
##           Estimate Std. Error t value Pr(>|t|)
## (Intercept)  3.003713  1.926023   1.560  0.119
## putamen_rvsn_ant_z -0.002347  0.135141  -0.017  0.986
## interview_age  0.016796  0.016046   1.047  0.295
##
##
## R-sq.(adj) = -0.00129
## lmer.REML = 12834  Scale est. = 14.129  n = 2050

##           stdcoef      stdse
## X(Intercept)  0.0000000000 0.00000000
```

```
## Xputamen_rvsn_ant_z -0.0003768869 0.02170540
## Xinterview_age      0.0228301843 0.02181099
```

### 3.4 Model: CBCL internalizing factor ~ Accumbens activity (feedback stage)

#### Female participants

```
##
## Family: gaussian
## Link function: identity
##
## Formula:
## cbcl_scr_syn_internal_r ~ accumbens_posvsneg_feedback_z + interview_age
##
## Parametric coefficients:
##
##           Estimate Std. Error t value Pr(>|t|)
## (Intercept)      0.99988    1.89645   0.527  0.5981
## accumbens_posvsneg_feedback_z  0.19684    0.17181   1.146  0.2521
## interview_age      0.03298    0.01582   2.085  0.0372 *
## ---
## Signif. codes:  0 '***' 0.001 '**' 0.01 '*' 0.05 '.' 0.1 ' ' 1
##
##
## R-sq.(adj) =  0.00028
## lmer.REML = 12781  Scale est. = 15.798    n = 2064

##
##           stdcoef      stdse
## X(Intercept)      0.00000000 0.00000000
## Xaccumbens_posvsneg_feedback_z  0.02475519 0.02160702
## Xinterview_age     0.04568771 0.02191529
```

#### Male participants

```
##
## Family: gaussian
## Link function: identity
##
## Formula:
## cbcl_scr_syn_internal_r ~ accumbens_posvsneg_feedback_z + interview_age
##
## Parametric coefficients:
##
##           Estimate Std. Error t value Pr(>|t|)
## (Intercept)      3.36478    1.93092   1.743  0.0816 .
## accumbens_posvsneg_feedback_z -0.22281    0.16571  -1.345  0.1789
## interview_age      0.01399    0.01609   0.869  0.3847
## ---
## Signif. codes:  0 '***' 0.001 '**' 0.01 '*' 0.05 '.' 0.1 ' ' 1
##
##
## R-sq.(adj) = -0.000388
## lmer.REML = 12833  Scale est. = 14.8      n = 2049
```

```
##
##               stdcoef      stdse
## X(Intercept)      0.00000000 0.00000000
## Xaccumbens_posvsneg_feedback_z -0.02927669 0.02177379
## Xinterview_age      0.01895670 0.02180197
```

### 3.5 Model: CBCL internalizing factor ~ Caudate activity (feedback stage)

#### Female participants

```
##
## Family: gaussian
## Link function: identity
##
## Formula:
## cbcl_scr_syn_internal_r ~ caudate_posvsneg_feedback_z + interview_age
##
## Parametric coefficients:
##               Estimate Std. Error t value Pr(>|t|)
## (Intercept)      0.99119    1.89617   0.523  0.6012
## caudate_posvsneg_feedback_z -0.03668    0.13461  -0.272  0.7853
## interview_age      0.03312    0.01582   2.094  0.0364 *
## ---
## Signif. codes:  0 '***' 0.001 '**' 0.01 '*' 0.05 '.' 0.1 ' ' 1
##
##
## R-sq.(adj) = -0.000154
## lmer.REML = 12789 Scale est. = 15.852    n = 2065
##
##               stdcoef      stdse
## X(Intercept)      0.000000000 0.000000000
## Xcaudate_posvsneg_feedback_z -0.005903269 0.02166702
## Xinterview_age      0.045857838 0.02190158
```

#### Male participants

```
##
## Family: gaussian
## Link function: identity
##
## Formula:
## cbcl_scr_syn_internal_r ~ caudate_posvsneg_feedback_z + interview_age
##
## Parametric coefficients:
##               Estimate Std. Error t value Pr(>|t|)
## (Intercept)      3.32207    1.92624   1.725  0.0847 .
## caudate_posvsneg_feedback_z -0.15618    0.13309  -1.174  0.2407
## interview_age      0.01417    0.01606   0.883  0.3775
## ---
## Signif. codes:  0 '***' 0.001 '**' 0.01 '*' 0.05 '.' 0.1 ' ' 1
##
##
## R-sq.(adj) = -0.000217
## lmer.REML = 12843 Scale est. = 14.85    n = 2051
```



```

##                stdcoef      stdse
## X(Intercept)      0.00000000 0.00000000
## Xcaudate_posvsneg_feedback_z -0.02531019 0.02156786
## Xinterview_age      0.01925548 0.02181229

```

### 3.6 Model: CBCL internalizing factor ~ Putamen activity (feedback stage)

#### Female participants

```

##
## Family: gaussian
## Link function: identity
##
## Formula:
## cbcl_scr_syn_internal_r ~ putamen_posvsneg_feedback_z + interview_age
##
## Parametric coefficients:
##                Estimate Std. Error t value Pr(>|t|)
## (Intercept)      1.13313    1.89586   0.598  0.5501
## putamen_posvsneg_feedback_z -0.11704    0.13669  -0.856  0.3919
## interview_age      0.03186    0.01582   2.014  0.0442 *
## ---
## Signif. codes:  0 '***' 0.001 '**' 0.01 '*' 0.05 '.' 0.1 ' ' 1
##
##
## R-sq.(adj) =  0.000199
## lmer.REML = 12792  Scale est. = 16.215    n = 2065
##
##                stdcoef      stdse
## X(Intercept)      0.00000000 0.00000000
## Xputamen_posvsneg_feedback_z -0.01856874 0.02168511
## Xinterview_age      0.04414924 0.02192297

```

#### Male participants

```

##
## Family: gaussian
## Link function: identity
##
## Formula:
## cbcl_scr_syn_internal_r ~ putamen_posvsneg_feedback_z + interview_age
##
## Parametric coefficients:
##                Estimate Std. Error t value Pr(>|t|)
## (Intercept)      3.23873    1.92503   1.682  0.0926 .
## putamen_posvsneg_feedback_z -0.04213    0.13493  -0.312  0.7549
## interview_age      0.01493    0.01604   0.931  0.3521
## ---
## Signif. codes:  0 '***' 0.001 '**' 0.01 '*' 0.05 '.' 0.1 ' ' 1
##
##
## R-sq.(adj) = -0.00116
## lmer.REML = 12878  Scale est. = 15.039    n = 2056

```

```

##                stdcoef    stdse
## X(Intercept)    0.00000000 0.0000000
## Xputamen_posvsneg_feedback_z -0.006749898 0.0216173
## Xinterview_age  0.020279347 0.0217891

```

### 3.7 Model: CBCL internalizing factor ~ OFC activity (anticipation stage)

#### Female participants

```

##
## Family: gaussian
## Link function: identity
##
## Formula:
## cbcl_scr_syn_internal_r ~ lOFC_rvsn_ant_z + interview_age
##
## Parametric coefficients:
##           Estimate Std. Error t value Pr(>|t|)
## (Intercept)    1.00430    1.90118   0.528   0.5974
## lOFC_rvsn_ant_z  0.05371    0.20796   0.258   0.7962
## interview_age   0.03302    0.01586   2.082   0.0374 *
## ---
## Signif. codes:  0 '***' 0.001 '**' 0.01 '*' 0.05 '.' 0.1 ' ' 1
##
##
## R-sq.(adj) = -8.98e-05
## lmer.REML = 12736 Scale est. = 15.567    n = 2056

```

```

##                stdcoef    stdse
## X(Intercept)    0.00000000 0.00000000
## XlOFC_rvsn_ant_z 0.005568829 0.02156341
## Xinterview_age   0.045736012 0.02196480

```

```

##
## Family: gaussian
## Link function: identity
##
## Formula:
## cbcl_scr_syn_internal_r ~ mOFC_rvsn_ant_z + interview_age
##
## Parametric coefficients:
##           Estimate Std. Error t value Pr(>|t|)
## (Intercept)    0.82010    1.90148   0.431   0.6663
## mOFC_rvsn_ant_z 0.17691    0.17881   0.989   0.3226
## interview_age   0.03454    0.01587   2.177   0.0296 *
## ---
## Signif. codes:  0 '***' 0.001 '**' 0.01 '*' 0.05 '.' 0.1 ' ' 1
##
##
## R-sq.(adj) = 0.000336
## lmer.REML = 12741 Scale est. = 15.138    n = 2057

```

```

##                stdcoef    stdse

```

```
## X(Intercept)      0.00000000 0.00000000
## XmOFC_rvsnt_ant_z 0.02118601 0.02141320
## Xinterview_age    0.04776384 0.02194123
```

## Male participants

```
##
## Family: gaussian
## Link function: identity
##
## Formula:
## cbcl_scr_syn_internal_r ~ lOFC_rvsnt_ant_z + interview_age
##
## Parametric coefficients:
##           Estimate Std. Error t value Pr(>|t|)
## (Intercept)    2.62529    1.91357   1.372   0.170
## lOFC_rvsnt_ant_z -0.10772    0.19356  -0.557   0.578
## interview_age    0.01966    0.01592   1.235   0.217
##
##
## R-sq.(adj) = -0.00122
## lmer.REML = 12706 Scale est. = 13.821    n = 2036
```

```
##           stdcoef      stdse
## X(Intercept)      0.00000000 0.00000000
## XlOFC_rvsnt_ant_z -0.01198528 0.02153614
## Xinterview_age     0.02697017 0.02184451
```

```
##
## Family: gaussian
## Link function: identity
##
## Formula:
## cbcl_scr_syn_internal_r ~ mOFC_rvsnt_ant_z + interview_age
##
## Parametric coefficients:
##           Estimate Std. Error t value Pr(>|t|)
## (Intercept)    2.51935    1.92180   1.311   0.190
## mOFC_rvsnt_ant_z -0.12792    0.16826  -0.760   0.447
## interview_age    0.02059    0.01600   1.287   0.198
##
##
## R-sq.(adj) = -0.0012
## lmer.REML = 12765 Scale est. = 13.816    n = 2042
```

```
##           stdcoef      stdse
## X(Intercept)      0.00000000 0.00000000
## XmOFC_rvsnt_ant_z -0.01623520 0.02135579
## Xinterview_age     0.02803578 0.02178658
```

### 3.8 Model: CBCL internalizing factor ~ OFC activity (feedback stage)

#### Female participants

```
##
## Family: gaussian
## Link function: identity
##
## Formula:
## cbcl_scr_syn_internal_r ~ lOFC_posvsneg_feedback_z + interview_age
##
## Parametric coefficients:
##               Estimate Std. Error t value Pr(>|t|)
## (Intercept)    0.98560    1.89246   0.521   0.6026
## lOFC_posvsneg_feedback_z -0.04673    0.23076  -0.203   0.8395
## interview_age   0.03302    0.01579   2.091   0.0366 *
## ---
## Signif. codes:  0 '***' 0.001 '**' 0.01 '*' 0.05 '.' 0.1 ' ' 1
##
##
## R-sq.(adj) = -0.000146
## lmer.REML = 12779 Scale est. = 16.099    n = 2065

##               stdcoef      stdse
## X(Intercept)    0.00000000 0.00000000
## XlOFC_posvsneg_feedback_z -0.004375458 0.02160700
## Xinterview_age   0.045862853 0.02192932

##
## Family: gaussian
## Link function: identity
##
## Formula:
## cbcl_scr_syn_internal_r ~ mOFC_posvsneg_feedback_z + interview_age
##
## Parametric coefficients:
##               Estimate Std. Error t value Pr(>|t|)
## (Intercept)    0.92801    1.89200   0.490   0.6238
## mOFC_posvsneg_feedback_z 0.20371    0.19485   1.046   0.2959
## interview_age   0.03360    0.01578   2.129   0.0334 *
## ---
## Signif. codes:  0 '***' 0.001 '**' 0.01 '*' 0.05 '.' 0.1 ' ' 1
##
##
## R-sq.(adj) = 0.000549
## lmer.REML = 12810 Scale est. = 15.903    n = 2069

##               stdcoef      stdse
## X(Intercept)    0.00000000 0.00000000
## XmOFC_posvsneg_feedback_z 0.02252826 0.02154774
## Xinterview_age   0.04658350 0.02187988
```

## Male participants

```
##
## Family: gaussian
## Link function: identity
##
## Formula:
## cbcl_scr_syn_internal_r ~ l0FC_posvsneg_feedback_z + interview_age
##
## Parametric coefficients:
##              Estimate Std. Error t value Pr(>|t|)
## (Intercept)    3.12278    1.93031   1.618   0.106
## l0FC_posvsneg_feedback_z 0.15275    0.22303   0.685   0.493
## interview_age   0.01593    0.01608   0.991   0.322
##
##
## R-sq.(adj) = -0.00122
## lmer.REML = 12729 Scale est. = 14.972    n = 2035

##              stdcoef      stdse
## X(Intercept)    0.00000000 0.00000000
## Xl0FC_posvsneg_feedback_z 0.01493689 0.02180927
## Xinterview_age  0.02171403 0.02191158

##
## Family: gaussian
## Link function: identity
##
## Formula:
## cbcl_scr_syn_internal_r ~ m0FC_posvsneg_feedback_z + interview_age
##
## Parametric coefficients:
##              Estimate Std. Error t value Pr(>|t|)
## (Intercept)    3.07567    1.92215   1.600   0.110
## m0FC_posvsneg_feedback_z 0.06058    0.18722   0.324   0.746
## interview_age   0.01633    0.01601   1.020   0.308
##
##
## R-sq.(adj) = -0.00121
## lmer.REML = 12780 Scale est. = 14.999    n = 2044

##              stdcoef      stdse
## X(Intercept)    0.00000000 0.00000000
## Xm0FC_posvsneg_feedback_z 0.007034218 0.02174054
## Xinterview_age  0.022296228 0.02186698
```

## 3.9 Model: CBCL internalizing factor ~ BIS-BAS-RR

### Female participants

```
##
## Family: gaussian
```

```

## Link function: identity
##
## Formula:
## cbcl_scr_syn_internal_r ~ bisbas_ss_basm_rr + interview_age
##
## Parametric coefficients:
##           Estimate Std. Error t value Pr(>|t|)
## (Intercept)    1.21645    1.72886   0.704   0.4817
## bisbas_ss_basm_rr -0.02712    0.04321  -0.628   0.5303
## interview_age    0.03358    0.01401   2.398   0.0166 *
## ---
## Signif. codes:  0 '***' 0.001 '**' 0.01 '*' 0.05 '.' 0.1 ' ' 1
##
##
## R-sq.(adj) = -0.000264
## lmer.REML = 16599  Scale est. = 17.025    n = 2681

##           stdcoef      stdse
## X(Intercept)    0.00000000 0.00000000
## Xbisbas_ss_basm_rr -0.01201656 0.01914694
## Xinterview_age    0.04625226 0.01929145

```

### Male participants

```

##
## Family: gaussian
## Link function: identity
##
## Formula:
## cbcl_scr_syn_internal_r ~ bisbas_ss_basm_rr + interview_age
##
## Parametric coefficients:
##           Estimate Std. Error t value Pr(>|t|)
## (Intercept)    3.11239    1.69534   1.836   0.0665 .
## bisbas_ss_basm_rr -0.06658    0.04448  -1.497   0.1346
## interview_age    0.02135    0.01374   1.554   0.1203
## ---
## Signif. codes:  0 '***' 0.001 '**' 0.01 '*' 0.05 '.' 0.1 ' ' 1
##
##
## R-sq.(adj) = -0.000597
## lmer.REML = 18107  Scale est. = 16.736    n = 2893

##           stdcoef      stdse
## X(Intercept)    0.00000000 0.00000000
## Xbisbas_ss_basm_rr -0.02744649 0.01833863
## Xinterview_age    0.02873301 0.01848803

```

## 3.10 Model: CBCL internalizing factor ~ MID Reaction Time

### Female participants

```
##
```

```

## Family: gaussian
## Link function: identity
##
## Formula:
## cbcl_scr_syn_internal_r ~ rt_diff_large_neutral_z + interview_age
##
## Parametric coefficients:
##           Estimate Std. Error t value Pr(>|t|)
## (Intercept)      0.65045    1.84166   0.353  0.7240
## rt_diff_large_neutral_z  0.10720    0.12129   0.884  0.3769
## interview_age      0.03602    0.01536   2.346  0.0191 *
## ---
## Signif. codes:  0 '***' 0.001 '**' 0.01 '*' 0.05 '.' 0.1 ' ' 1
##
## R-sq.(adj) =  0.000286
## lmer.REML = 13864 Scale est. = 16.79    n = 2237

```

```

##           stdcoef      stdse
## X(Intercept)      0.00000000 0.00000000
## Xrt_diff_large_neutral_z 0.01831347 0.02072078
## Xinterview_age      0.04932191 0.02102775

```

```

##
## Family: gaussian
## Link function: identity
##
## Formula:
## cbcl_scr_syn_internal_r ~ rt_diff_large_small_z + interview_age
##
## Parametric coefficients:
##           Estimate Std. Error t value Pr(>|t|)
## (Intercept)      0.65522    1.84051   0.356  0.7219
## rt_diff_large_small_z  0.14840    0.11684   1.270  0.2042
## interview_age      0.03601    0.01535   2.346  0.0191 *
## ---
## Signif. codes:  0 '***' 0.001 '**' 0.01 '*' 0.05 '.' 0.1 ' ' 1
##
## R-sq.(adj) =  0.000654
## lmer.REML = 13864 Scale est. = 16.809    n = 2237

```

```

##           stdcoef      stdse
## X(Intercept)      0.00000000 0.00000000
## Xrt_diff_large_small_z 0.02637377 0.02076472
## Xinterview_age      0.04929782 0.02101228

```

## Male participants

```

##
## Family: gaussian
## Link function: identity
##

```

```

## Formula:
## cbcl_scr_syn_internal_r ~ rt_diff_large_neutral_z + interview_age
##
## Parametric coefficients:
##           Estimate Std. Error t value Pr(>|t|)
## (Intercept)      2.27829   1.81447   1.256   0.209
## rt_diff_large_neutral_z -0.09028   0.12278  -0.735   0.462
## interview_age      0.02284   0.01512   1.511   0.131
##
##
## R-sq.(adj) = -0.00078
## lmer.REML = 14407 Scale est. = 13.459   n = 2304

##           stdcoef      stdse
## X(Intercept)      0.0000000 0.0000000
## Xrt_diff_large_neutral_z -0.01487991 0.02023669
## Xinterview_age      0.03106944 0.02055981

##
## Family: gaussian
## Link function: identity
##
## Formula:
## cbcl_scr_syn_internal_r ~ rt_diff_large_small_z + interview_age
##
## Parametric coefficients:
##           Estimate Std. Error t value Pr(>|t|)
## (Intercept)      2.32101   1.81284   1.280   0.201
## rt_diff_large_small_z -0.12010   0.12369  -0.971   0.332
## interview_age      0.02249   0.01510   1.489   0.137
##
##
## R-sq.(adj) = -0.000713
## lmer.REML = 14407 Scale est. = 13.408   n = 2304

##           stdcoef      stdse
## X(Intercept)      0.0000000 0.0000000
## Xrt_diff_large_small_z -0.01958396 0.02016891
## Xinterview_age      0.03058289 0.02054226

```



## 4—Internalizing~Puberty x Reward—

### 4.1 Model: CBCL internalizing factor ~ PDS x Accumbens activity (anticipation stage)

#### Female participants

```
##
## Family: gaussian
## Link function: identity
##
## Formula:
## cbcl_scr_syn_internal_r ~ PDS_score * accumbens_rvsn_ant_z +
##   race.ethnicity.5level + demo_race_hispanic + interview_age +
##   bmi + household.income + high.educ
##
## Parametric coefficients:
##               Estimate Std. Error t value Pr(>|t|)
## (Intercept)      0.19987    2.43939   0.082  0.9347
## PDS_score         0.79254    0.19269   4.113 4.08e-05 ***
## accumbens_rvsn_ant_z -0.11644    0.43011  -0.271  0.7866
## race.ethnicity.5levelBlack -0.54696    0.88663  -0.617  0.5374
## race.ethnicity.5levelMixed  1.03544    0.85146   1.216  0.2241
## race.ethnicity.5levelOther -0.16088    1.02269  -0.157  0.8750
## race.ethnicity.5levelWhite  1.45279    0.79104   1.837  0.0664 .
## demo_race_hispanic1 -0.20403    0.38852  -0.525  0.5995
## interview_age      0.02278    0.01742   1.307  0.1912
## bmi                0.02269    0.03487   0.651  0.5153
## household.income[>=200K] -1.88984    0.97221  -1.944  0.0521 .
## household.income[100K-200K] -0.89020    0.90918  -0.979  0.3277
## household.income[12K-16K]  0.25208    1.12725   0.224  0.8231
## household.income[16K-25K] -1.10913    1.03345  -1.073  0.2833
## household.income[25K-35K]  0.78057    0.95360   0.819  0.4131
## household.income[35K-50K] -0.41598    0.92982  -0.447  0.6547
## household.income[50K-75K] -0.73265    0.91346  -0.802  0.4226
## household.income[5K-12K]  0.55629    1.06287   0.523  0.6008
## household.income[75K-100K] -0.62387    0.92037  -0.678  0.4980
## high.educBachelor    -0.31054    0.84267  -0.369  0.7125
## high.educHS Diploma/GED -0.49667    0.85388  -0.582  0.5609
## high.educPost Graduate Degree  0.06275    0.85607   0.073  0.9416
## high.educSome College  0.36018    0.79327   0.454  0.6498
## PDS_score:accumbens_rvsn_ant_z -0.10649    0.23252  -0.458  0.6470
## ---
## Signif. codes:  0 '***' 0.001 '**' 0.01 '*' 0.05 '.' 0.1 ' ' 1
##
##
## R-sq.(adj) =  0.0285
## lmer.REML = 11325  Scale est. = 15.622  n = 1846

##               stdcoef      stdse
## X(Intercept)      0.00000000  0.00000000
## XPDS_score        0.107011992  0.02601736
## Xaccumbens_rvsn_ant_z -0.014960479  0.05526203
```

```

## Xrace.ethnicity.5levelBlack      -0.034560375  0.05602296
## Xrace.ethnicity.5levelMixed      0.063797834  0.05246169
## Xrace.ethnicity.5levelOther     -0.006074813  0.03861621
## Xrace.ethnicity.5levelWhite      0.127058903  0.06918335
## Xdemo_race_hispanic1            -0.014771830  0.02812869
## Xinterview_age                   0.031799209  0.02432274
## Xbmi                              0.016025516  0.02462548
## Xhousehold.income[>=200K]       -0.113556047  0.05841779
## Xhousehold.income[100K-200K]    -0.078343337  0.08001394
## Xhousehold.income[12K-16K]      0.007252521  0.03243229
## Xhousehold.income[16K-25K]     -0.038975964  0.03631672
## Xhousehold.income[25K-35K]      0.035339503  0.04317302
## Xhousehold.income[35K-50K]     -0.021585969  0.04825047
## Xhousehold.income[50K-75K]     -0.045969663  0.05731450
## Xhousehold.income[5K-12K]       0.017645193  0.03371366
## Xhousehold.income[75K-100K]    -0.042175094  0.06221856
## Xhigh.educBachelor              -0.025565564  0.06937398
## Xhigh.educHS Diploma/GED       -0.024288047  0.04175622
## Xhigh.educPost Graduate Degree   0.005711212  0.07791975
## Xhigh.educSome College          0.028653464  0.06310652
## XPDS_score:accumbens_rvs_n_ant_z -0.025316001  0.05528025

```

## Male participants

```

##
## Family: gaussian
## Link function: identity
##
## Formula:
## cbcl_scr_syn_internal_r ~ PDS_score * accumbens_rvs_n_ant_z +
##   race.ethnicity.5level + demo_race_hispanic + interview_age +
##   bmi + household.income + high.educ
##
## Parametric coefficients:
##
##               Estimate Std. Error t value Pr(>|t|)
## (Intercept)    2.859246   2.569197   1.113 0.265901
## PDS_score      0.746805   0.264678   2.822 0.004831 **
## accumbens_rvs_n_ant_z 0.322388   0.441001   0.731 0.464851
## race.ethnicity.5levelBlack -0.153525   1.087194  -0.141 0.887718
## race.ethnicity.5levelMixed  1.262630   1.059158   1.192 0.233375
## race.ethnicity.5levelOther  0.289358   1.196307   0.242 0.808904
## race.ethnicity.5levelWhite  1.163318   0.997636   1.166 0.243738
## demo_race_hispanic1  0.323762   0.408992   0.792 0.428693
## interview_age    0.010786   0.017062   0.632 0.527358
## bmi             0.012850   0.036989   0.347 0.728335
## household.income[>=200K] -3.278609   0.990934  -3.309 0.000956 ***
## household.income[100K-200K] -2.762172   0.934281  -2.956 0.003152 **
## household.income[12K-16K]  -1.157762   1.200897  -0.964 0.335134
## household.income[16K-25K]   0.001016   1.031449   0.001 0.999214
## household.income[25K-35K]  -0.651275   1.016740  -0.641 0.521895
## household.income[35K-50K]  -0.664395   0.975487  -0.681 0.495902
## household.income[50K-75K]  -2.268137   0.935495  -2.425 0.015425 *
## household.income[5K-12K]   0.169356   1.101038   0.154 0.877773

```

```

## household.income[75K-100K]      -2.902283    0.950458   -3.054 0.002294 **
## high.educBachelor                1.457488    0.961917    1.515 0.129898
## high.educHS Diploma/GED        -0.973618    0.987237   -0.986 0.324164
## high.educPost Graduate Degree    0.588792    0.961457    0.612 0.540353
## high.educSome College            0.873343    0.919136    0.950 0.342148
## PDS_score:accumbens_rvsn_ant_z -0.228251    0.300514   -0.760 0.447631
## ---
## Signif. codes:  0 '***' 0.001 '**' 0.01 '*' 0.05 '.' 0.1 ' ' 1
##
##
## R-sq.(adj) =  0.0365
## lmer.REML = 11401  Scale est. = 15.274    n = 1835

##
##                stdcoef      stdse
## X(Intercept)    0.000000e+00 0.00000000
## XPDS_score      6.874737e-02 0.02436500
## Xaccumbens_rvsn_ant_z 4.171684e-02 0.05706532
## Xrace.ethnicity.5levelBlack -8.294041e-03 0.05873472
## Xrace.ethnicity.5levelMixed 7.251725e-02 0.06083113
## Xrace.ethnicity.5levelOther 1.086055e-02 0.04490136
## Xrace.ethnicity.5levelWhite 9.356175e-02 0.08023651
## Xdemo_race_hispanic1 2.251422e-02 0.02844112
## Xinterview_age  1.462141e-02 0.02312906
## Xbmi             8.340261e-03 0.02400803
## Xhousehold.income[>=200K] -1.960010e-01 0.05923976
## Xhousehold.income[100K-200K] -2.337609e-01 0.07906765
## Xhousehold.income[12K-16K] -2.981900e-02 0.03092999
## Xhousehold.income[16K-25K]  3.662037e-05 0.03715945
## Xhousehold.income[25K-35K] -2.498446e-02 0.03900457
## Xhousehold.income[35K-50K] -3.128923e-02 0.04593996
## Xhousehold.income[50K-75K] -1.387104e-01 0.05721120
## Xhousehold.income[5K-12K]   5.018424e-03 0.03262631
## Xhousehold.income[75K-100K] -1.863685e-01 0.06103313
## Xhigh.educBachelor          1.152216e-01 0.07604422
## Xhigh.educHS Diploma/GED   -4.127320e-02 0.04185051
## Xhigh.educPost Graduate Degree 5.151005e-02 0.08411239
## Xhigh.educSome College      6.729733e-02 0.07082601
## XPDS_score:accumbens_rvsn_ant_z -4.337629e-02 0.05710894

```

## 4.2 Model: CBCL internalizing factor ~ PDS x Caudate activity (anticipation stage)

### Female participants

```

##
## Family: gaussian
## Link function: identity
##
## Formula:
## cbcl_scr_syn_internal_r ~ PDS_score * caudate_rvsn_ant_z + race.ethnicity.5level +
##   demo_race_hispanic + interview_age + bmi + household.income +
##   high.educ
##

```

```

## Parametric coefficients:
##
## Estimate Std. Error t value Pr(>|t|)
## (Intercept) 0.52927 2.43361 0.217 0.8279
## PDS_score 0.76803 0.19272 3.985 7.01e-05 ***
## caudate_rvsn_ant_z 0.77370 0.34515 2.242 0.0251 *
## race.ethnicity.5levelBlack -0.51173 0.88814 -0.576 0.5646
## race.ethnicity.5levelMixed 1.07930 0.85226 1.266 0.2055
## race.ethnicity.5levelOther -0.07330 1.02515 -0.072 0.9430
## race.ethnicity.5levelWhite 1.52492 0.79237 1.925 0.0544 .
## demo_race_hispanic1 -0.22051 0.38852 -0.568 0.5704
## interview_age 0.02131 0.01742 1.223 0.2213
## bmi 0.03008 0.03466 0.868 0.3856
## household.income[>=200K] -2.21288 0.96642 -2.290 0.0221 *
## household.income[100K-200K] -1.20284 0.90240 -1.333 0.1827
## household.income[12K-16K] 0.06126 1.12824 0.054 0.9567
## household.income[16K-25K] -1.36902 1.02749 -1.332 0.1829
## household.income[25K-35K] 0.43839 0.94424 0.464 0.6425
## household.income[35K-50K] -0.68580 0.92095 -0.745 0.4566
## household.income[50K-75K] -1.01690 0.90543 -1.123 0.2615
## household.income[5K-12K] 0.23352 1.05848 0.221 0.8254
## household.income[75K-100K] -0.92123 0.91378 -1.008 0.3135
## high.educBachelor -0.33766 0.83936 -0.402 0.6875
## high.educHS Diploma/GED -0.49618 0.85416 -0.581 0.5614
## high.educPost Graduate Degree 0.09642 0.85272 0.113 0.9100
## high.educSome College 0.30288 0.79132 0.383 0.7019
## PDS_score:caudate_rvsn_ant_z -0.44649 0.19155 -2.331 0.0199 *
## ---
## Signif. codes: 0 '***' 0.001 '**' 0.01 '*' 0.05 '.' 0.1 ' ' 1
##
##
## R-sq.(adj) = 0.0296
## lmer.REML = 11351 Scale est. = 16.23 n = 1848

##
## stdcoef stdse
## X(Intercept) 0.000000000 0.00000000
## XPDS_score 0.103386830 0.02594317
## Xcaudate_rvsn_ant_z 0.127679675 0.05695820
## Xrace.ethnicity.5levelBlack -0.032328048 0.05610742
## Xrace.ethnicity.5levelMixed 0.066748360 0.05270770
## Xrace.ethnicity.5levelOther -0.002740822 0.03833191
## Xrace.ethnicity.5levelWhite 0.133189153 0.06920679
## Xdemo_race_hispanic1 -0.015925456 0.02805945
## Xinterview_age 0.029680470 0.02425928
## Xbmi 0.021343804 0.02459650
## Xhousehold.income[>=200K] -0.132216431 0.05774189
## Xhousehold.income[100K-200K] -0.105577357 0.07920656
## Xhousehold.income[12K-16K] 0.001736919 0.03198802
## Xhousehold.income[16K-25K] -0.047930926 0.03597332
## Xhousehold.income[25K-35K] 0.019774365 0.04259193
## Xhousehold.income[35K-50K] -0.035764538 0.04802750
## Xhousehold.income[50K-75K] -0.063684416 0.05670397
## Xhousehold.income[5K-12K] 0.007379645 0.03344971
## Xhousehold.income[75K-100K] -0.061785299 0.06128583
## Xhigh.educBachelor -0.027717979 0.06890287

```

```
## Xhigh.educHS Diploma/GED      -0.024175106 0.04161622
## Xhigh.educPost Graduate Degree  0.008748282 0.07737202
## Xhigh.educSome College         0.024009078 0.06272739
## XPDS_score:caudate_rvsnt_ant_z -0.133227661 0.05715552
```

Male participants

```
##
## Family: gaussian
## Link function: identity
##
## Formula:
## cbcl_scr_syn_internal_r ~ PDS_score * caudate_rvsnt_ant_z + race.ethnicity.5level +
##   demo_race_hispanic + interview_age + bmi + household.income +
##   high.educ
```

```
## Parametric coefficients:
##               Estimate Std. Error t value Pr(>|t|)
## (Intercept)      2.48555    2.56081   0.971  0.33187
## PDS_score         0.72568    0.26626   2.725  0.00648 **
## caudate_rvsnt_ant_z -0.09282    0.38267  -0.243  0.80838
## race.ethnicity.5levelBlack -0.05816    1.08640  -0.054  0.95731
## race.ethnicity.5levelMixed  1.34570    1.06052   1.269  0.20464
## race.ethnicity.5levelOther  0.23651    1.19759   0.197  0.84347
## race.ethnicity.5levelWhite  1.20280    0.99969   1.203  0.22907
## demo_race_hispanic1  0.42190    0.41215   1.024  0.30613
## interview_age     0.01128    0.01707   0.661  0.50874
## bmi               0.02058    0.03709   0.555  0.57903
## household.income[>=200K] -3.18918    0.98250  -3.246  0.00119 **
## household.income[100K-200K] -2.61262    0.92462  -2.826  0.00477 **
## household.income[12K-16K]  -0.77184    1.19761  -0.644  0.51934
## household.income[16K-25K]   0.16415    1.01899   0.161  0.87204
## household.income[25K-35K]  -0.46044    1.01018  -0.456  0.64859
## household.income[35K-50K]  -0.49419    0.96707  -0.511  0.60940
## household.income[50K-75K]  -2.00391    0.92521  -2.166  0.03045 *
## household.income[5K-12K]   0.43471    1.09766   0.396  0.69213
## household.income[75K-100K] -2.72386    0.94042  -2.896  0.00382 **
## high.educBachelor      1.47288    0.94727   1.555  0.12015
## high.educHS Diploma/GED  -1.10369    0.97012  -1.138  0.25541
## high.educPost Graduate Degree  0.63371    0.94740   0.669  0.50365
## high.educSome College    0.87046    0.90511   0.962  0.33632
## PDS_score:caudate_rvsnt_ant_z  0.18338    0.26974   0.680  0.49669
```

```
## ---
## Signif. codes:  0 '***' 0.001 '**' 0.01 '*' 0.05 '.' 0.1 ' ' 1
```

```
## R-sq.(adj) = 0.0376
## lmer.REML = 11428 Scale est. = 14.229 n = 1839
```

```
##               stdcoef      stdse
## X(Intercept)      0.00000000 0.00000000
## XPDS_score        0.066193606 0.02428756
## Xcaudate_rvsnt_ant_z -0.014992825 0.06181152
```

```

## Xrace.ethnicity.5levelBlack      -0.003170393  0.05921844
## Xrace.ethnicity.5levelMixed      0.077387769  0.06098759
## Xrace.ethnicity.5levelOther      0.008901371  0.04507310
## Xrace.ethnicity.5levelWhite      0.096946948  0.08057611
## Xdemo_race_hispanic1            0.029095825  0.02842299
## Xinterview_age                   0.015257237  0.02308444
## Xbmi                              0.013312345  0.02399022
## Xhousehold.income[>=200K]       -0.189449471  0.05836445
## Xhousehold.income[100K-200K]    -0.220849994  0.07815964
## Xhousehold.income[12K-16K]      -0.019572477  0.03036923
## Xhousehold.income[16K-25K]       0.005933171  0.03683043
## Xhousehold.income[25K-35K]      -0.017519520  0.03843717
## Xhousehold.income[35K-50K]      -0.022975644  0.04496025
## Xhousehold.income[50K-75K]      -0.123043257  0.05680924
## Xhousehold.income[5K-12K]        0.012724363  0.03212972
## Xhousehold.income[75K-100K]     -0.174953391  0.06040320
## Xhigh.educBachelor               0.116375237  0.07484562
## Xhigh.educHS Diploma/GED        -0.046656095  0.04100992
## Xhigh.educPost Graduate Degree   0.055358321  0.08276074
## Xhigh.educSome College           0.066707636  0.06936321
## XPDS_score:caudate_rvsnt_ant_z  0.041986258  0.06175797

```

### 4.3 Model: CBCL internalizing factor ~ PDS x Putamen activity (anticipation stage)

#### Female participants

```

##
## Family: gaussian
## Link function: identity
##
## Formula:
## cbcl_scr_syn_internal_r ~ PDS_score * putamen_rvsnt_ant_z + race.ethnicity.5level +
##   demo_race_hispanic + interview_age + bmi + household.income +
##   high.educ
##
## Parametric coefficients:
##
##               Estimate Std. Error t value Pr(>|t|)
## (Intercept)    0.18199    2.43846   0.075   0.9405
## PDS_score      0.77946    0.19301   4.038 5.6e-05 ***
## putamen_rvsnt_ant_z
##   0.51684    0.35098   1.473  0.1410
## race.ethnicity.5levelBlack
##   -0.51921    0.88894  -0.584  0.5592
## race.ethnicity.5levelMixed
##    1.06269    0.85367   1.245  0.2133
## race.ethnicity.5levelOther
##   -0.12951    1.02499  -0.126  0.8995
## race.ethnicity.5levelWhite
##    1.51865    0.79338   1.914  0.0558 .
## demo_race_hispanic1
##   -0.20874    0.38909  -0.536  0.5917
## interview_age
##    0.02186    0.01743   1.254  0.2100
## bmi
##    0.02891    0.03490   0.828  0.4075
## household.income[>=200K]
##   -1.97204    0.97578  -2.021  0.0434 *
## household.income[100K-200K]
##   -0.96416    0.91232  -1.057  0.2907
## household.income[12K-16K]
##    0.22577    1.13244   0.199  0.8420
## household.income[16K-25K]
##   -1.09675    1.03876  -1.056  0.2912
## household.income[25K-35K]
##    0.67425    0.95488   0.706  0.4802

```

```

## household.income[35K-50K]      -0.43173    0.93241   -0.463    0.6434
## household.income[50K-75K]      -0.79323    0.91494   -0.867    0.3861
## household.income[5K-12K]       0.49588    1.06790    0.464    0.6425
## household.income[75K-100K]     -0.69572    0.92325   -0.754    0.4512
## high.educBachelor              -0.26109    0.83684   -0.312    0.7551
## high.educHS Diploma/GED        -0.46064    0.85090   -0.541    0.5883
## high.educPost Graduate Degree   0.15474    0.85033    0.182    0.8556
## high.educSome College           0.38669    0.78792    0.491    0.6236
## PDS_score:putamen_rvsn_ant_z   -0.27967    0.19194   -1.457    0.1453
## ---
## Signif. codes:  0 '***' 0.001 '**' 0.01 '*' 0.05 '.' 0.1 ' ' 1
##
##
## R-sq.(adj) =  0.0276
## lmer.REML = 11353  Scale est. = 15.813   n = 1848

##
##                                stdcoef      stdse
## X(Intercept)                   0.00000000 0.00000000
## XPDS_score                      0.105152168 0.02603766
## Xputamen_rvsn_ant_z             0.084077831 0.05709604
## Xrace.ethnicity.5levelBlack     -0.032747483 0.05606675
## Xrace.ethnicity.5levelMixed      0.065607816 0.05270353
## Xrace.ethnicity.5levelOther     -0.004872633 0.03856414
## Xrace.ethnicity.5levelWhite      0.132598789 0.06927303
## Xdemo_race_hispanic1            -0.015094407 0.02813535
## Xinterview_age                  0.030450451 0.02428342
## Xbmi                             0.020413623 0.02464068
## Xhousehold.income[>=200K]       -0.117838821 0.05830744
## Xhousehold.income[100K-200K]    -0.084704011 0.08014896
## Xhousehold.income[12K-16K]      0.006472136 0.03246424
## Xhousehold.income[16K-25K]     -0.038129703 0.03611347
## Xhousehold.income[25K-35K]      0.030293656 0.04290230
## Xhousehold.income[35K-50K]     -0.022323578 0.04821173
## Xhousehold.income[50K-75K]     -0.049856962 0.05750657
## Xhousehold.income[5K-12K]       0.015672282 0.03375099
## Xhousehold.income[75K-100K]    -0.046732573 0.06201619
## Xhigh.educBachelor              -0.021435037 0.06870257
## Xhigh.educHS Diploma/GED        -0.022445596 0.04146178
## Xhigh.educPost Graduate Degree   0.014035010 0.07712424
## Xhigh.educSome College           0.030679818 0.06251273
## XPDS_score:putamen_rvsn_ant_z  -0.083377790 0.05722210

```

## Male participants

```

##
## Family: gaussian
## Link function: identity
##
## Formula:
## cbcl_scr_syn_internal_r ~ PDS_score * putamen_rvsn_ant_z + race.ethnicity.5level +
##   demo_race_hispanic + interview_age + bmi + household.income +
##   high.educ
##

```

```

## Parametric coefficients:
##
## Estimate Std. Error t value Pr(>|t|)
## (Intercept) 2.71576 2.56820 1.057 0.29044
## PDS_score 0.77404 0.26757 2.893 0.00386 **
## putamen_rvsn_ant_z 0.25804 0.39935 0.646 0.51826
## race.ethnicity.5levelBlack -0.04199 1.08847 -0.039 0.96924
## race.ethnicity.5levelMixed 1.31702 1.06208 1.240 0.21512
## race.ethnicity.5levelOther 0.27435 1.19957 0.229 0.81912
## race.ethnicity.5levelWhite 1.16691 1.00147 1.165 0.24409
## demo_race_hispanic1 0.40045 0.41106 0.974 0.33009
## interview_age 0.00832 0.01712 0.486 0.62702
## bmi 0.01792 0.03719 0.482 0.63004
## household.income[>=200K] -3.12119 0.98398 -3.172 0.00154 **
## household.income[100K-200K] -2.59183 0.92584 -2.799 0.00517 **
## household.income[12K-16K] -0.86593 1.19412 -0.725 0.46845
## household.income[16K-25K] 0.14300 1.01870 0.140 0.88838
## household.income[25K-35K] -0.48889 1.01019 -0.484 0.62848
## household.income[35K-50K] -0.46781 0.96956 -0.482 0.62952
## household.income[50K-75K] -1.98913 0.92630 -2.147 0.03189 *
## household.income[5K-12K] 0.21180 1.09051 0.194 0.84603
## household.income[75K-100K] -2.64598 0.94222 -2.808 0.00503 **
## high.educBachelor 1.59309 0.94154 1.692 0.09082 .
## high.educHS Diploma/GED -1.04366 0.96527 -1.081 0.27975
## high.educPost Graduate Degree 0.74976 0.94224 0.796 0.42630
## high.educSome College 0.98208 0.89815 1.093 0.27434
## PDS_score:putamen_rvsn_ant_z -0.19638 0.27861 -0.705 0.48098
## ---
## Signif. codes: 0 '***' 0.001 '**' 0.01 '*' 0.05 '.' 0.1 ' ' 1
##
##
## R-sq.(adj) = 0.0356
## lmer.REML = 11435 Scale est. = 14.318 n = 1839

##
## stdcoef stdse
## X(Intercept) 0.000000000 0.00000000
## XPDS_score 0.070349821 0.02431875
## Xputamen_rvsn_ant_z 0.041192760 0.06375063
## Xrace.ethnicity.5levelBlack -0.002287275 0.05929830
## Xrace.ethnicity.5levelMixed 0.075847633 0.06116563
## Xrace.ethnicity.5levelOther 0.010319796 0.04512266
## Xrace.ethnicity.5levelWhite 0.094055420 0.08072085
## Xdemo_race_hispanic1 0.027727711 0.02846230
## Xinterview_age 0.011233894 0.02311466
## Xbmi 0.011567033 0.02401003
## Xhousehold.income[>=200K] -0.185308357 0.05841991
## Xhousehold.income[100K-200K] -0.218802840 0.07815997
## Xhousehold.income[12K-16K] -0.022227050 0.03065122
## Xhousehold.income[16K-25K] 0.005197051 0.03702160
## Xhousehold.income[25K-35K] -0.018691926 0.03862319
## Xhousehold.income[35K-50K] -0.021662539 0.04489732
## Xhousehold.income[50K-75K] -0.121865818 0.05675036
## Xhousehold.income[5K-12K] 0.006312933 0.03250418
## Xhousehold.income[75K-100K] -0.169610740 0.06039754
## Xhigh.educBachelor 0.125561341 0.07420882

```



```
## Xhigh.educHS Diploma/GED      -0.044281548 0.04095545
## Xhigh.educPost Graduate Degree  0.065400729 0.08219036
## Xhigh.educSome College         0.075500829 0.06904819
## XPDS_score:putamen_rvs_n_ant_z -0.044909045 0.06371277
```

#### 4.4 Model: CBCL internalizing factor ~ PDS x Lateral OFC activity (anticipation stage)

##### Female participants

```
##
## Family: gaussian
## Link function: identity
##
## Formula:
## cbcl_scr_syn_internal_r ~ PDS_score * lOFC_rvs_n_ant_z + race.ethnicity.5level +
##   demo_race_hispanic + interview_age + bmi + household.income +
##   high.educ
##
## Parametric coefficients:
##               Estimate Std. Error t value Pr(>|t|)
## (Intercept)    0.509631   2.453955   0.208 0.835504
## PDS_score      0.743493   0.195361   3.806 0.000146 ***
## lOFC_rvs_n_ant_z 0.371556   0.520662   0.714 0.475553
## race.ethnicity.5levelBlack -0.509222   0.893439  -0.570 0.568777
## race.ethnicity.5levelMixed  1.085426   0.856802   1.267 0.205377
## race.ethnicity.5levelOther -0.008328   1.028092  -0.008 0.993538
## race.ethnicity.5levelWhite  1.520267   0.795904   1.910 0.056276 .
## demo_race_hispanic1 -0.229686   0.391675  -0.586 0.557666
## interview_age   0.022207   0.017531   1.267 0.205428
## bmi            0.033037   0.034909   0.946 0.344094
## household.income[>=200K] -2.349377   0.982168  -2.392 0.016857 *
## household.income[100K-200K] -1.351875   0.918676  -1.472 0.141317
## household.income[12K-16K]  -0.067052   1.139912  -0.059 0.953100
## household.income[16K-25K]  -1.511751   1.041776  -1.451 0.146917
## household.income[25K-35K]   0.280808   0.961148   0.292 0.770199
## household.income[35K-50K]  -0.795571   0.938319  -0.848 0.396623
## household.income[50K-75K]  -1.151035   0.920871  -1.250 0.211482
## household.income[5K-12K]    0.107912   1.079860   0.100 0.920410
## household.income[75K-100K] -1.073761   0.929025  -1.156 0.247918
## high.educBachelor  -0.285637   0.862130  -0.331 0.740444
## high.educHS Diploma/GED  -0.471556   0.874502  -0.539 0.589796
## high.educPost Graduate Degree 0.157297   0.875476   0.180 0.857431
## high.educSome College   0.349323   0.812297   0.430 0.667215
## PDS_score:lOFC_rvs_n_ant_z -0.164213   0.289256  -0.568 0.570304
## ---
## Signif. codes:  0 '***' 0.001 '**' 0.01 '*' 0.05 '.' 0.1 ' ' 1
##
##
## R-sq.(adj) = 0.0252
## lmer.REML = 11292 Scale est. = 15.515    n = 1837
##
##               stdcoef      stdse
```

```

## X(Intercept)                0.000000000 0.00000000
## XPDS_score                   0.0992864267 0.02608855
## l0FC_rvsn_ant_z             0.0386078794 0.05410134
## Xrace.ethnicity.5levelBlack -0.0317648213 0.05573192
## Xrace.ethnicity.5levelMixed  0.0667265493 0.05267188
## Xrace.ethnicity.5levelOther -0.0003138226 0.03874193
## Xrace.ethnicity.5levelWhite  0.1322072683 0.06921438
## Xdemo_race_hispanic1       -0.0165507281 0.02822332
## Xinterview_age              0.0308949463 0.02439025
## Xbmi                         0.0233990477 0.02472547
## Xhousehold.income[>=200K]  -0.1405716100 0.05876658
## Xhousehold.income[100K-200K] -0.1187419359 0.08069191
## Xhousehold.income[12K-16K]  -0.0019043810 0.03237532
## Xhousehold.income[16K-25K]  -0.0526417971 0.03627645
## Xhousehold.income[25K-35K]   0.0125326661 0.04289679
## Xhousehold.income[35K-50K]  -0.0409550973 0.04830357
## Xhousehold.income[50K-75K]  -0.0720564538 0.05764789
## Xhousehold.income[5K-12K]    0.0033244329 0.03326709
## Xhousehold.income[75K-100K] -0.0723140891 0.06256662
## Xhigh.educBachelor          -0.0234651162 0.07082406
## Xhigh.educHS Diploma/GED    -0.0229340558 0.04253133
## Xhigh.educPost Graduate Degree 0.0142568755 0.07935018
## Xhigh.educSome College       0.0276502576 0.06429649
## XPDS_score:l0FC_rvsn_ant_z  -0.0307965833 0.05424722

```

### Male participants

```

##
## Family: gaussian
## Link function: identity
##
## Formula:
## cbcl_scr_syn_internal_r ~ PDS_score * l0FC_rvsn_ant_z + race.ethnicity.5level +
##   demo_race_hispanic + interview_age + bmi + household.income +
##   high.educ
##
## Parametric coefficients:
##               Estimate Std. Error t value Pr(>|t|)
## (Intercept)    2.10197    2.57318   0.817  0.4141
## PDS_score       0.66769    0.26742   2.497  0.0126 *
## l0FC_rvsn_ant_z -0.20166    0.55535  -0.363  0.7166
## race.ethnicity.5levelBlack -0.14132    1.09965  -0.129  0.8978
## race.ethnicity.5levelMixed  1.34572    1.06992   1.258  0.2086
## race.ethnicity.5levelOther  0.28138    1.20312   0.234  0.8151
## race.ethnicity.5levelWhite  1.20261    1.00894   1.192  0.2334
## demo_race_hispanic1  0.37432    0.41077   0.911  0.3623
## interview_age    0.01269    0.01701   0.746  0.4558
## bmi              0.01546    0.03685   0.419  0.6749
## household.income[>=200K] -2.70319    1.00470  -2.691  0.0072 **
## household.income[100K-200K] -2.20637    0.94944  -2.324  0.0202 *
## household.income[12K-16K]  -0.58643    1.21682  -0.482  0.6299
## household.income[16K-25K]   0.65737    1.04489   0.629  0.5293
## household.income[25K-35K]  -0.12516    1.02975  -0.122  0.9033

```

```

## household.income[35K-50K]      -0.07166    0.98848   -0.072    0.9422
## household.income[50K-75K]     -1.69955    0.95145   -1.786    0.0742 .
## household.income[5K-12K]       0.46359    1.11822    0.415    0.6785
## household.income[75K-100K]    -2.32741    0.96416   -2.414    0.0159 *
## high.educBachelor              1.46298    0.93815    1.559    0.1191
## high.educHS Diploma/GED       -0.91484    0.97359   -0.940    0.3475
## high.educPost Graduate Degree  0.60064    0.93775    0.641    0.5219
## high.educSome College          0.84112    0.89685    0.938    0.3484
## PDS_score:lOFC_rvsn_ant_z     0.04616    0.39036    0.118    0.9059
## ---
## Signif. codes:  0 '***' 0.001 '**' 0.01 '*' 0.05 '.' 0.1 ' ' 1
##
##
## R-sq.(adj) =  0.0345
## lmer.REML = 11318  Scale est. = 14.15    n = 1826

##
##                stdcoef      stdse
## X(Intercept)    0.000000000 0.000000000
## XPDS_score      0.060716176 0.02431744
## XlOFC_rvsn_ant_z -0.022238347 0.06124179
## Xrace.ethnicity.5levelBlack -0.007627576 0.05935342
## Xrace.ethnicity.5levelMixed  0.077644203 0.06173129
## Xrace.ethnicity.5levelOther  0.010773181 0.04606451
## Xrace.ethnicity.5levelWhite  0.097212629 0.08155745
## Xdemo_race_hispanic1 0.026219734 0.02877298
## Xinterview_age  0.017308620 0.02320448
## Xbmi             0.010086502 0.02404551
## Xhousehold.income[>=200K] -0.162997084 0.06058133
## Xhousehold.income[100K-200K] -0.187800311 0.08081359
## Xhousehold.income[12K-16K] -0.015046547 0.03122130
## Xhousehold.income[16K-25K]  0.023746269 0.03774481
## Xhousehold.income[25K-35K] -0.004844149 0.03985425
## Xhousehold.income[35K-50K] -0.003393162 0.04680503
## Xhousehold.income[50K-75K] -0.104833113 0.05868786
## Xhousehold.income[5K-12K]   0.013729750 0.03311778
## Xhousehold.income[75K-100K] -0.151389930 0.06271514
## Xhigh.educBachelor          0.116289414 0.07457154
## Xhigh.educHS Diploma/GED   -0.038280631 0.04073908
## Xhigh.educPost Graduate Degree 0.052932683 0.08264072
## Xhigh.educSome College      0.065199940 0.06951984
## XPDS_score:lOFC_rvsn_ant_z  0.007193700 0.06082786

```

#### 4.5 Model: CBCL internalizing factor ~ PDS x Medial OFC activity (anticipation stage)

##### Female participants

```

##
## Family: gaussian
## Link function: identity
##
## Formula:
## cbcl_scr_syn_internal_r ~ PDS_score * mOFC_rvsn_ant_z + race.ethnicity.5level +

```

```

##      demo_race_hispanic + interview_age + bmi + household.income +
##      high.educ
##
## Parametric coefficients:
##              Estimate Std. Error t value Pr(>|t|)
## (Intercept)      0.23125    2.44798   0.094 0.924750
## PDS_score         0.74166    0.19569   3.790 0.000156 ***
## mOFC_rvsn_ant_z   0.68269    0.45307   1.507 0.132039
## race.ethnicity.5levelBlack -0.49374    0.89222  -0.553 0.580068
## race.ethnicity.5levelMixed  1.06878    0.85750   1.246 0.212780
## race.ethnicity.5levelOther  0.01560    1.02588   0.015 0.987869
## race.ethnicity.5levelWhite  1.57030    0.79556   1.974 0.048552 *
## demo_race_hispanic1 -0.25419    0.39118  -0.650 0.515899
## interview_age     0.02340    0.01750   1.337 0.181485
## bmi               0.03649    0.03489   1.046 0.295773
## household.income[>=200K] -2.46751    0.98037  -2.517 0.011924 *
## household.income[100K-200K] -1.41492    0.91672  -1.543 0.122894
## household.income[12K-16K]  -0.22244    1.13312  -0.196 0.844391
## household.income[16K-25K]  -1.54100    1.04031  -1.481 0.138706
## household.income[25K-35K]   0.26413    0.95711   0.276 0.782602
## household.income[35K-50K]  -0.87687    0.93651  -0.936 0.349235
## household.income[50K-75K]  -1.21896    0.91802  -1.328 0.184408
## household.income[5K-12K]    0.04002    1.07524   0.037 0.970316
## household.income[75K-100K] -1.14780    0.92676  -1.239 0.215686
## high.educBachelor  -0.15461    0.85496  -0.181 0.856513
## high.educHS Diploma/GED  -0.37719    0.86561  -0.436 0.663068
## high.educPost Graduate Degree 0.27185    0.86905   0.313 0.754462
## high.educSome College  0.45474    0.80486   0.565 0.572148
## PDS_score:mOFC_rvsn_ant_z  -0.23269    0.24885  -0.935 0.349888
## ---
## Signif. codes:  0 '***' 0.001 '**' 0.01 '*' 0.05 '.' 0.1 ' ' 1
##
##
## R-sq.(adj) =  0.028
## lmer.REML = 11289  Scale est. = 15.582    n = 1837

##              stdcoef      stdse
## X(Intercept)      0.000000000 0.000000000
## XPDS_score        0.099509736 0.02625529
## XmOFC_rvsn_ant_z  0.082381947 0.05467383
## Xrace.ethnicity.5levelBlack -0.030963739 0.05595333
## Xrace.ethnicity.5levelMixed  0.065581331 0.05261681
## Xrace.ethnicity.5levelOther  0.000591398 0.03889171
## Xrace.ethnicity.5levelWhite  0.136736952 0.06927483
## Xdemo_race_hispanic1 -0.018337638 0.02822009
## Xinterview_age    0.032497620 0.02431162
## Xbmi              0.025841144 0.02470844
## Xhousehold.income[>=200K] -0.147641205 0.05865966
## Xhousehold.income[100K-200K] -0.124032850 0.08036032
## Xhousehold.income[12K-16K]  -0.006387366 0.03253742
## Xhousehold.income[16K-25K]  -0.053660688 0.03622589
## Xhousehold.income[25K-35K]   0.011885601 0.04306825
## Xhousehold.income[35K-50K]  -0.045140599 0.04821083
## Xhousehold.income[50K-75K]  -0.076444323 0.05757171

```

```

## Xhousehold.income[5K-12K]      0.001244252 0.03343280
## Xhousehold.income[75K-100K]   -0.077301204 0.06241443
## Xhigh.educBachelor            -0.012676501 0.07009793
## Xhigh.educHS Diploma/GED     -0.018468329 0.04238259
## Xhigh.educPost Graduate Degree 0.024620769 0.07870883
## Xhigh.educSome College        0.036079120 0.06385760
## XPDS_score:mOFC_rvsn_ant_z    -0.051230396 0.05478901

```

Male participants

```

##
## Family: gaussian
## Link function: identity
##
## Formula:
## cbcl_scr_syn_internal_r ~ PDS_score * mOFC_rvsn_ant_z + race.ethnicity.5level +
##   demo_race_hispanic + interview_age + bmi + household.income +
##   high.educ
##

```

```

## Parametric coefficients:
##
##              Estimate Std. Error t value Pr(>|t|)
## (Intercept)      2.54363    2.57390   0.988  0.32317
## PDS_score         0.74359    0.26692   2.786  0.00540 **
## mOFC_rvsn_ant_z  0.61233    0.45000   1.361  0.17376
## race.ethnicity.5levelBlack -0.09319    1.10302  -0.084  0.93268
## race.ethnicity.5levelMixed  1.23552    1.07249   1.152  0.24947
## race.ethnicity.5levelOther  0.28777    1.20757   0.238  0.81167
## race.ethnicity.5levelWhite  1.15398    1.01227   1.140  0.25444
## demo_race_hispanic1  0.36428    0.40994   0.889  0.37432
## interview_age     0.01299    0.01705   0.762  0.44607
## bmi               0.01669    0.03685   0.453  0.65060
## household.income[>=200K] -3.25664    0.99570  -3.271  0.00109 **
## household.income[100K-200K] -2.79416    0.93926  -2.975  0.00297 **
## household.income[12K-16K]  -1.23549    1.19344  -1.035  0.30070
## household.income[16K-25K]  -0.05577    1.03172  -0.054  0.95690
## household.income[25K-35K]  -0.82678    1.02134  -0.810  0.41833
## household.income[35K-50K]  -0.62499    0.97884  -0.638  0.52323
## household.income[50K-75K]  -2.26413    0.94042  -2.408  0.01616 *
## household.income[5K-12K]   -0.12935    1.11002  -0.117  0.90725
## household.income[75K-100K] -2.86335    0.95452  -3.000  0.00274 **
## high.educBachelor      1.45568    0.93998   1.549  0.12165
## high.educHS Diploma/GED -1.09945    0.97047  -1.133  0.25740
## high.educPost Graduate Degree 0.64010    0.93950   0.681  0.49576
## high.educSome College    0.89634    0.89649   1.000  0.31752
## PDS_score:mOFC_rvsn_ant_z -0.62561    0.31555  -1.983  0.04757 *
## ---

```

```

## Signif. codes:  0 '***' 0.001 '**' 0.01 '*' 0.05 '.' 0.1 ' ' 1
##
##

```

```

## R-sq.(adj) = 0.0375
## lmer.REML = 11383 Scale est. = 14.183 n = 1834

```

```

##              stdcoef      stdse

```

```

## X(Intercept)                0.000000000 0.00000000
## XPDS_score                  0.067482741 0.02422390
## XmOFC_rvs_n_ant_z          0.077096888 0.05665789
## Xrace.ethnicity.5levelBlack -0.005032152 0.05955983
## Xrace.ethnicity.5levelMixed 0.071521144 0.06208380
## Xrace.ethnicity.5levelOther 0.010941783 0.04591504
## Xrace.ethnicity.5levelWhite 0.093140095 0.08170210
## Xdemo_race_hispanic1       0.025321377 0.02849497
## Xinterview_age             0.017591386 0.02308134
## Xbmi                       0.010857514 0.02396748
## Xhousehold.income[>=200K] -0.194699311 0.05952835
## Xhousehold.income[100K-200K] -0.236886460 0.07962968
## Xhousehold.income[12K-16K] -0.032278633 0.03117999
## Xhousehold.income[16K-25K] -0.002025134 0.03746719
## Xhousehold.income[25K-35K] -0.031607539 0.03904538
## Xhousehold.income[35K-50K] -0.029291815 0.04587602
## Xhousehold.income[50K-75K] -0.139192142 0.05781398
## Xhousehold.income[5K-12K] -0.003804193 0.03264581
## Xhousehold.income[75K-100K] -0.184479688 0.06149774
## Xhigh.educBachelor          0.115286731 0.07444489
## Xhigh.educHS Diploma/GED   -0.046296195 0.04086477
## Xhigh.educPost Graduate Degree 0.056069579 0.08229600
## Xhigh.educSome College     0.069195269 0.06920672
## XPDS_score:mOFC_rvs_n_ant_z -0.113219309 0.05710713

```

#### 4.6 Model: CBCL internalizing factor ~ PDS x Accumbens activity (feedback)

##### Female participants

```

##
## Family: gaussian
## Link function: identity
##
## Formula:
## cbcl_scr_syn_internal_r ~ PDS_score * accumbens_posvsneg_feedback_z +
##   race.ethnicity.5level + demo_race_hispanic + interview_age +
##   bmi + household.income + high.educ
##
## Parametric coefficients:
##
##           Estimate Std. Error t value Pr(>|t|)
## (Intercept)      0.35307    2.43986   0.145  0.8850
## PDS_score         0.76492    0.19403   3.942 8.37e-05
## accumbens_posvsneg_feedback_z 0.10595    0.44779   0.237  0.8130
## race.ethnicity.5levelBlack  -0.48032    0.89176  -0.539  0.5902
## race.ethnicity.5levelMixed   1.10492    0.85548   1.292  0.1967
## race.ethnicity.5levelOther  -0.05763    1.02403  -0.056  0.9551
## race.ethnicity.5levelWhite   1.51240    0.79409   1.905  0.0570
## demo_race_hispanic1        -0.23063    0.39229  -0.588  0.5567
## interview_age           0.02054    0.01746   1.176  0.2398
## bmi                   0.03083    0.03480   0.886  0.3758
## household.income[>=200K]    -1.97151    0.97565  -2.021  0.0435
## household.income[100K-200K] -0.93035    0.91144  -1.021  0.3075
## household.income[12K-16K]   0.23620    1.13195   0.209  0.8347

```

```

## household.income[16K-25K]          -1.17570    1.03619   -1.135    0.2567
## household.income[25K-35K]          0.67948    0.95356    0.713    0.4762
## household.income[35K-50K]         -0.44467    0.93169   -0.477    0.6332
## household.income[50K-75K]         -0.77898    0.91599   -0.850    0.3952
## household.income[5K-12K]           0.38165    1.07169    0.356    0.7218
## household.income[75K-100K]        -0.67134    0.92331   -0.727    0.4673
## high.educBachelor                  -0.30408    0.84731   -0.359    0.7197
## high.educHS Diploma/GED           -0.47572    0.85865   -0.554    0.5796
## high.educPost Graduate Degree       0.10898    0.86114    0.127    0.8993
## high.educSome College               0.34659    0.79736    0.435    0.6639
## PDS_score:accumbens_posvsneg_feedback_z 0.05945    0.24407    0.244    0.8076
##
## (Intercept)
## PDS_score                          ***
## accumbens_posvsneg_feedback_z
## race.ethnicity.5levelBlack
## race.ethnicity.5levelMixed
## race.ethnicity.5levelOther
## race.ethnicity.5levelWhite         .
## demo_race_hispanic1
## interview_age
## bmi
## household.income[>=200K]           *
## household.income[100K-200K]
## household.income[12K-16K]
## household.income[16K-25K]
## household.income[25K-35K]
## household.income[35K-50K]
## household.income[50K-75K]
## household.income[5K-12K]
## household.income[75K-100K]
## high.educBachelor
## high.educHS Diploma/GED
## high.educPost Graduate Degree
## high.educSome College
## PDS_score:accumbens_posvsneg_feedback_z
## ---
## Signif. codes:  0 '***' 0.001 '**' 0.01 '*' 0.05 '.' 0.1 ' ' 1
##
##
## R-sq.(adj) =  0.0257
## lmer.REML = 11341  Scale est. = 15.659    n = 1846

##
##                stdcoef      stdse
## X(Intercept)    0.00000000  0.00000000
## XPDS_score      0.102813360  0.02607938
## Xaccumbens_posvsneg_feedback_z 0.013476231  0.05695898
## Xrace.ethnicity.5levelBlack -0.030215838  0.05609839
## Xrace.ethnicity.5levelMixed  0.068022763  0.05266632
## Xrace.ethnicity.5levelOther -0.002183297  0.03879566
## Xrace.ethnicity.5levelWhite  0.131974676  0.06929349
## Xdemo_race_hispanic1 -0.016652635  0.02832608
## Xinterview_age  0.028583582  0.02430622
## Xbmi             0.021839563  0.02465115

```

```

## Xhousehold.income[>=200K] -0.117910084 0.05835076
## Xhousehold.income[100K-200K] -0.081788592 0.08012622
## Xhousehold.income[12K-16K] 0.006777705 0.03248041
## Xhousehold.income[16K-25K] -0.041204834 0.03631547
## Xhousehold.income[25K-35K] 0.030680126 0.04305584
## Xhousehold.income[35K-50K] -0.023013018 0.04821807
## Xhousehold.income[50K-75K] -0.048745550 0.05731900
## Xhousehold.income[5K-12K] 0.011966382 0.03360199
## Xhousehold.income[75K-100K] -0.045133486 0.06207293
## Xhigh.educBachelor -0.025015949 0.06970521
## Xhigh.educHS Diploma/GED -0.023201141 0.04187711
## Xhigh.educPost Graduate Degree 0.009893020 0.07817175
## Xhigh.educSome College 0.027433570 0.06311406
## XPDS_score:accumbens_posvsneg_feedback_z 0.013917799 0.05714278

```

### Male participants

```

##
## Family: gaussian
## Link function: identity
##
## Formula:
## cbcl_scr_syn_internal_r ~ PDS_score * accumbens_posvsneg_feedback_z +
##   race.ethnicity.5level + demo_race_hispanic + interview_age +
##   bmi + household.income + high.educ
##
## Parametric coefficients:
##               Estimate Std. Error t value Pr(>|t|)
## (Intercept)    3.018972   2.585380   1.168 0.243077
## PDS_score       0.728786   0.265367   2.746 0.006086
## accumbens_posvsneg_feedback_z 0.509864   0.504454   1.011 0.312283
## race.ethnicity.5levelBlack -0.211440   1.099040  -0.192 0.847461
## race.ethnicity.5levelMixed  1.322489   1.073039   1.232 0.217933
## race.ethnicity.5levelOther  0.253071   1.207146   0.210 0.833969
## race.ethnicity.5levelWhite  1.244603   1.014020   1.227 0.219833
## demo_race_hispanic1  0.382408   0.407972   0.937 0.348709
## interview_age    0.006769   0.017093   0.396 0.692123
## bmi              0.038407   0.037149   1.034 0.301342
## household.income[>=200K] -3.504046   1.000787  -3.501 0.000474
## household.income[100K-200K] -3.073459   0.943729  -3.257 0.001148
## household.income[12K-16K] -1.262883   1.196647  -1.055 0.291405
## household.income[16K-25K] -0.332785   1.033838  -0.322 0.747571
## household.income[25K-35K] -0.816356   1.029624  -0.793 0.427958
## household.income[35K-50K] -0.977107   0.984886  -0.992 0.321280
## household.income[50K-75K] -2.438422   0.945278  -2.580 0.009970
## household.income[5K-12K] -0.090017   1.119976  -0.080 0.935948
## household.income[75K-100K] -3.128107   0.960304  -3.257 0.001145
## high.educBachelor  1.569271   0.946051   1.659 0.097338
## high.educHS Diploma/GED -1.096906   0.971477  -1.129 0.259000
## high.educPost Graduate Degree 0.731940   0.946214   0.774 0.439300
## high.educSome College 0.981834   0.903110   1.087 0.277106
## PDS_score:accumbens_posvsneg_feedback_z -0.606386   0.365947  -1.657 0.097685
##

```



```

## (Intercept)
## PDS_score **
## accumbens_posvsneg_feedback_z
## race.ethnicity.5levelBlack
## race.ethnicity.5levelMixed
## race.ethnicity.5levelOther
## race.ethnicity.5levelWhite
## demo_race_hispanic1
## interview_age
## bmi
## household.income[>=200K] ***
## household.income[100K-200K] **
## household.income[12K-16K]
## household.income[16K-25K]
## household.income[25K-35K]
## household.income[35K-50K]
## household.income[50K-75K] **
## household.income[5K-12K]
## household.income[75K-100K] **
## high.educBachelor .
## high.educHS Diploma/GED
## high.educPost Graduate Degree
## high.educSome College
## PDS_score:accumbens_posvsneg_feedback_z .
## ---
## Signif. codes:  0 '***' 0.001 '**' 0.01 '*' 0.05 '.' 0.1 ' ' 1
##
##
## R-sq.(adj) =  0.0401
## lmer.REML = 11414  Scale est. = 15.119    n = 1837

##                stdcoef      stdse
## X(Intercept)    0.00000000 0.00000000
## XPDS_score      0.066670253 0.02427612
## Xaccumbens_posvsneg_feedback_z 0.066928061 0.06621789
## Xrace.ethnicity.5levelBlack -0.011471327 0.05962652
## Xrace.ethnicity.5levelMixed  0.076198452 0.06182576
## Xrace.ethnicity.5levelOther  0.009576849 0.04568155
## Xrace.ethnicity.5levelWhite  0.100236842 0.08166632
## Xdemo_race_hispanic1        0.026579006 0.02835582
## Xinterview_age            0.009138590 0.02307500
## Xbmi                    0.024694044 0.02388541
## Xhousehold.income[>=200K] -0.208135859 0.05944547
## Xhousehold.income[100K-200K] -0.259730438 0.07975218
## Xhousehold.income[12K-16K]  -0.032837473 0.03111519
## Xhousehold.income[16K-25K]  -0.012100309 0.03759118
## Xhousehold.income[25K-35K]  -0.031061214 0.03917574
## Xhousehold.income[35K-50K]  -0.045886053 0.04625137
## Xhousehold.income[50K-75K]  -0.148960037 0.05774579
## Xhousehold.income[5K-12K]   -0.002609612 0.03246821
## Xhousehold.income[75K-100K] -0.200605108 0.06158418
## Xhigh.educBachelor          0.123404683 0.07439583
## Xhigh.educHS Diploma/GED   -0.046564372 0.04123984
## Xhigh.educPost Graduate Degree 0.063915807 0.08262696

```

```
## Xhigh.educSome College 0.075453503 0.06940363
## XPDS_score:accumbens_posvsneg_feedback_z -0.109842974 0.06628886
```

#### 4.7 Model: CBCL internalizing factor ~ PDS x Caudate activity (feedback)

##### Female participants

```
##
## Family: gaussian
## Link function: identity
##
## Formula:
## cbcl_scr_syn_internal_r ~ PDS_score * caudate_posvsneg_feedback_z +
##   race.ethnicity.5level + demo_race_hispanic + interview_age +
##   bmi + household.income + high.educ
##
## Parametric coefficients:
##
##           Estimate Std. Error t value Pr(>|t|)
## (Intercept)      0.51190    2.42883   0.211  0.8331
## PDS_score         0.76428    0.19286   3.963 7.69e-05 ***
## caudate_posvsneg_feedback_z
## -0.71105    0.35018  -2.031  0.0424 *
## race.ethnicity.5levelBlack
## -0.60318    0.89066  -0.677  0.4983
## race.ethnicity.5levelMixed
##  1.00450    0.85426   1.176  0.2398
## race.ethnicity.5levelOther
## -0.17787    1.02347  -0.174  0.8620
## race.ethnicity.5levelWhite
##  1.49748    0.79346   1.887  0.0593 .
## demo_race_hispanic1
## -0.17104    0.38968  -0.439  0.6608
## interview_age
##  0.02055    0.01739   1.181  0.2377
## bmi
##  0.03194    0.03473   0.920  0.3579
## household.income[>=200K]
## -2.17768    0.96850  -2.249  0.0247 *
## household.income[100K-200K]
## -1.20550    0.90382  -1.334  0.1824
## household.income[12K-16K]
## -0.06817    1.12429  -0.061  0.9517
## household.income[16K-25K]
## -1.38480    1.03248  -1.341  0.1800
## household.income[25K-35K]
##  0.40339    0.94577   0.427  0.6698
## household.income[35K-50K]
## -0.71028    0.92465  -0.768  0.4425
## household.income[50K-75K]
## -1.04628    0.90657  -1.154  0.2486
## household.income[5K-12K]
##  0.22101    1.05915   0.209  0.8347
## household.income[75K-100K]
## -0.93949    0.91389  -1.028  0.3041
## high.educBachelor
## -0.16956    0.84517  -0.201  0.8410
## high.educHS Diploma/GED
## -0.31013    0.85714  -0.362  0.7175
## high.educPost Graduate Degree
##  0.17402    0.85809   0.203  0.8393
## high.educSome College
##  0.47665    0.79539   0.599  0.5491
## PDS_score:caudate_posvsneg_feedback_z
##  0.41089    0.19275   2.132  0.0332 *
## ---
## Signif. codes:  0 '***' 0.001 '**' 0.01 '*' 0.05 '.' 0.1 ' ' 1
##
##
## R-sq.(adj) =  0.0281
## lmer.REML = 11350 Scale est. = 15.053 n = 1848
##
##           stdcoef      stdse
## X(Intercept)  0.000000000 0.00000000
## XPDS_score    0.103068871 0.02600894
## Xcaudate_posvsneg_feedback_z
## -0.114857614 0.05656456
```

```

## Xrace.ethnicity.5levelBlack -0.037988010 0.05609318
## Xrace.ethnicity.5levelMixed 0.062031929 0.05275409
## Xrace.ethnicity.5levelOther -0.006734470 0.03874923
## Xrace.ethnicity.5levelWhite 0.130786014 0.06929906
## Xdemo_race_hispanic1 -0.012385072 0.02821749
## Xinterview_age 0.028594080 0.02420649
## Xbmi 0.022645215 0.02462371
## Xhousehold.income[>=200K] -0.129900278 0.05777143
## Xhousehold.income[100K-200K] -0.105892839 0.07939283
## Xhousehold.income[12K-16K] -0.001954850 0.03223936
## Xhousehold.income[16K-25K] -0.048156973 0.03590489
## Xhousehold.income[25K-35K] 0.018202689 0.04267662
## Xhousehold.income[35K-50K] -0.036736306 0.04782385
## Xhousehold.income[50K-75K] -0.065549327 0.05679611
## Xhousehold.income[5K-12K] 0.006986897 0.03348368
## Xhousehold.income[75K-100K] -0.063305138 0.06158001
## Xhigh.educBachelor -0.013906384 0.06931526
## Xhigh.educHS Diploma/GED -0.015166467 0.04191708
## Xhigh.educPost Graduate Degree 0.015795715 0.07788825
## Xhigh.educSome College 0.037827133 0.06312301
## XPDS_score:caudate_posvsneg_feedback_z 0.120673469 0.05660809

```

## Male participants

```

##
## Family: gaussian
## Link function: identity
##
## Formula:
## cbcl_scr_syn_internal_r ~ PDS_score * caudate_posvsneg_feedback_z +
##   race.ethnicity.5level + demo_race_hispanic + interview_age +
##   bmi + household.income + high.educ
##
## Parametric coefficients:
##
## Estimate Std. Error t value Pr(>|t|)
## (Intercept) 3.139563 2.572936 1.220 0.222538
## PDS_score 0.738174 0.265498 2.780 0.005486 **
## caudate_posvsneg_feedback_z 0.252663 0.410542 0.615 0.538343
## race.ethnicity.5levelBlack -0.194140 1.092567 -0.178 0.858985
## race.ethnicity.5levelMixed 1.239086 1.064811 1.164 0.244712
## race.ethnicity.5levelOther 0.209688 1.201120 0.175 0.861431
## race.ethnicity.5levelWhite 1.105359 1.004990 1.100 0.271534
## demo_race_hispanic1 0.377290 0.408111 0.924 0.355360
## interview_age 0.007253 0.017107 0.424 0.671623
## bmi 0.021823 0.037046 0.589 0.555873
## household.income[>=200K] -3.282110 0.987548 -3.323 0.000907 ***
## household.income[100K-200K] -2.812670 0.931135 -3.021 0.002557 **
## household.income[12K-16K] -1.127801 1.186812 -0.950 0.342098
## household.income[16K-25K] -0.135907 1.028471 -0.132 0.894884
## household.income[25K-35K] -0.556258 1.016070 -0.547 0.584130
## household.income[35K-50K] -0.697369 0.972226 -0.717 0.473287
## household.income[50K-75K] -2.190933 0.933407 -2.347 0.019020 *
## household.income[5K-12K] -0.172457 1.104247 -0.156 0.875912

```

```

## household.income[75K-100K]          -2.876674    0.946853   -3.038 0.002414 **
## high.educBachelor                   1.569932    0.948042    1.656 0.097900 .
## high.educHS Diploma/GED            -1.057967    0.976312   -1.084 0.278670
## high.educPost Graduate Degree        0.699966    0.948189    0.738 0.460480
## high.educSome College                0.932271    0.904269    1.031 0.302694
## PDS_score:caudate_posvsneg_feedback_z -0.313226    0.295090   -1.061 0.288622
## ---
## Signif. codes:  0 '***' 0.001 '**' 0.01 '*' 0.05 '.' 0.1 ' ' 1
##
##
## R-sq.(adj) = 0.0357
## lmer.REML = 11419  Scale est. = 14.952    n = 1837

##                                stdcoef    stdse
## X(Intercept)                   0.000000000 0.000000000
## XPDS_score                      0.067638450 0.02432743
## Xcaudate_posvsneg_feedback_z    0.040339718 0.06554639
## Xrace.ethnicity.5levelBlack     -0.010525180 0.05923287
## Xrace.ethnicity.5levelMixed      0.071650281 0.06157281
## Xrace.ethnicity.5levelOther       0.007904438 0.04527764
## Xrace.ethnicity.5levelWhite       0.089115887 0.08102395
## Xdemo_race_hispanic1             0.026295087 0.02844311
## Xinterview_age                   0.009815453 0.02315014
## Xbmi                             0.014155034 0.02402856
## Xhousehold.income[>=200K]        -0.195979223 0.05896785
## Xhousehold.income[100K-200K]     -0.237893824 0.07875477
## Xhousehold.income[12K-16K]       -0.029372562 0.03090944
## Xhousehold.income[16K-25K]       -0.004920059 0.03723232
## Xhousehold.income[25K-35K]       -0.021199100 0.03872265
## Xhousehold.income[35K-50K]       -0.032582892 0.04542491
## Xhousehold.income[50K-75K]       -0.134283519 0.05720902
## Xhousehold.income[5K-12K]        -0.005056042 0.03237408
## Xhousehold.income[75K-100K]      -0.184509710 0.06073108
## Xhigh.educBachelor                0.123737657 0.07472202
## Xhigh.educHS Diploma/GED         -0.044793998 0.04133675
## Xhigh.educPost Graduate Degree     0.061195134 0.08289621
## Xhigh.educSome College            0.071866528 0.06970794
## XPDS_score:caudate_posvsneg_feedback_z -0.069804148 0.06576236

```

#### 4.8 Model: CBCL internalizing factor ~ PDS x Putamen activity (feedback)

##### Female participants

```

##
## Family: gaussian
## Link function: identity
##
## Formula:
## cbcl_scr_syn_internal_r ~ PDS_score * putamen_posvsneg_feedback_z +
##   race.ethnicity.5level + demo_race_hispanic + interview_age +
##   bmi + household.income + high.educ
##
## Parametric coefficients:

```

|                                          | Estimate | Std. Error | t value | Pr(> t )     |
|------------------------------------------|----------|------------|---------|--------------|
| ## (Intercept)                           | 0.57505  | 2.43611    | 0.236   | 0.8134       |
| ## PDS_score                             | 0.80088  | 0.19338    | 4.141   | 3.61e-05 *** |
| ## putamen_posvsneg_feedback_z           | -0.61980 | 0.36241    | -1.710  | 0.0874 .     |
| ## race.ethnicity.5levelBlack            | -0.59957 | 0.88903    | -0.674  | 0.5001       |
| ## race.ethnicity.5levelMixed            | 1.06549  | 0.85352    | 1.248   | 0.2121       |
| ## race.ethnicity.5levelOther            | -0.20223 | 1.02412    | -0.197  | 0.8435       |
| ## race.ethnicity.5levelWhite            | 1.53343  | 0.79261    | 1.935   | 0.0532 .     |
| ## demo_race_hispanic1                   | -0.21173 | 0.39216    | -0.540  | 0.5893       |
| ## interview_age                         | 0.01948  | 0.01738    | 1.121   | 0.2625       |
| ## bmi                                   | 0.02802  | 0.03484    | 0.804   | 0.4214       |
| ## household.income[>=200K]              | -2.01635 | 0.97301    | -2.072  | 0.0384 *     |
| ## household.income[100K-200K]           | -1.02319 | 0.90912    | -1.125  | 0.2605       |
| ## household.income[12K-16K]             | 0.14503  | 1.13069    | 0.128   | 0.8980       |
| ## household.income[16K-25K]             | -1.20627 | 1.03453    | -1.166  | 0.2438       |
| ## household.income[25K-35K]             | 0.62129  | 0.95232    | 0.652   | 0.5142       |
| ## household.income[35K-50K]             | -0.48021 | 0.93076    | -0.516  | 0.6060       |
| ## household.income[50K-75K]             | -0.83024 | 0.91322    | -0.909  | 0.3634       |
| ## household.income[5K-12K]              | 0.54493  | 1.07020    | 0.509   | 0.6107       |
| ## household.income[75K-100K]            | -0.81486 | 0.92045    | -0.885  | 0.3761       |
| ## high.educBachelor                     | -0.33667 | 0.84974    | -0.396  | 0.6920       |
| ## high.educHS Diploma/GED               | -0.53510 | 0.86179    | -0.621  | 0.5347       |
| ## high.educPost Graduate Degree         | 0.05744  | 0.86134    | 0.067   | 0.9468       |
| ## high.educSome College                 | 0.33091  | 0.80000    | 0.414   | 0.6792       |
| ## PDS_score:putamen_posvsneg_feedback_z | 0.31332  | 0.19814    | 1.581   | 0.1140       |

## ---  
## Signif. codes: 0 '\*\*\*' 0.001 '\*\*' 0.01 '\*' 0.05 '.' 0.1 ' ' 1  
##  
##  
## R-sq.(adj) = 0.0286  
## lmer.REML = 11330 Scale est. = 15.573 n = 1845

|                                 | stdcoef      | stdse       |
|---------------------------------|--------------|-------------|
| ## X(Intercept)                 | 0.000000000  | 0.000000000 |
| ## XPDS_score                   | 0.107727068  | 0.02601181  |
| ## Xputamen_posvsneg_feedback_z | -0.098799050 | 0.05776922  |
| ## Xrace.ethnicity.5levelBlack  | -0.037732325 | 0.05594899  |
| ## Xrace.ethnicity.5levelMixed  | 0.065621716  | 0.05256684  |
| ## Xrace.ethnicity.5levelOther  | -0.007618943 | 0.03858338  |
| ## Xrace.ethnicity.5levelWhite  | 0.133794359  | 0.06915677  |
| ## Xdemo_race_hispanic1         | -0.015259627 | 0.02826281  |
| ## Xinterview_age               | 0.027164930  | 0.02423814  |
| ## Xbmi                         | 0.019811728  | 0.02463622  |
| ## Xhousehold.income[>=200K]    | -0.120640564 | 0.05821626  |
| ## Xhousehold.income[100K-200K] | -0.090012896 | 0.07997804  |
| ## Xhousehold.income[12K-16K]   | 0.004163389  | 0.03245828  |
| ## Xhousehold.income[16K-25K]   | -0.042294234 | 0.03627298  |
| ## Xhousehold.income[25K-35K]   | 0.028064929  | 0.04301777  |
| ## Xhousehold.income[35K-50K]   | -0.024790384 | 0.04804919  |
| ## Xhousehold.income[50K-75K]   | -0.051789221 | 0.05696535  |
| ## Xhousehold.income[5K-12K]    | 0.017093151  | 0.03356980  |
| ## Xhousehold.income[75K-100K]  | -0.054882048 | 0.06199378  |
| ## Xhigh.educBachelor           | -0.027615895 | 0.06970091  |
| ## Xhigh.educHS Diploma/GED     | -0.026195673 | 0.04218874  |

```
## Xhigh.educPost Graduate Degree      0.005219198 0.07826839
## Xhigh.educSome College              0.026222175 0.06339461
## XPDS_score:putamen_posvsneg_feedback_z 0.091244617 0.05770297
```

### Male participants

```
##
## Family: gaussian
## Link function: identity
##
## Formula:
## cbcl_scr_syn_internal_r ~ PDS_score * putamen_posvsneg_feedback_z +
##   race.ethnicity.5level + demo_race_hispanic + interview_age +
##   bmi + household.income + high.educ
##
## Parametric coefficients:
##               Estimate Std. Error t value Pr(>|t|)
## (Intercept)    3.219320   2.587687   1.244 0.213626
## PDS_score       0.715741   0.266515   2.686 0.007307 **
## putamen_posvsneg_feedback_z 0.114113   0.401754   0.284 0.776414
## race.ethnicity.5levelBlack -0.167483   1.094021  -0.153 0.878345
## race.ethnicity.5levelMixed  1.243634   1.066748   1.166 0.243841
## race.ethnicity.5levelOther  0.188140   1.203094   0.156 0.875751
## race.ethnicity.5levelWhite  1.119430   1.006209   1.113 0.266060
## demo_race_hispanic1 0.337952   0.407576   0.829 0.407115
## interview_age    0.006897   0.017112   0.403 0.686978
## bmi              0.027413   0.036981   0.741 0.458614
## household.income[>=200K] -3.313477   0.993398  -3.335 0.000869 ***
## household.income[100K-200K] -2.860442   0.936191  -3.055 0.002280 **
## household.income[12K-16K]  -1.158791   1.191781  -0.972 0.331021
## household.income[16K-25K]  -0.168135   1.037583  -0.162 0.871289
## household.income[25K-35K]  -0.610510   1.022563  -0.597 0.550555
## household.income[35K-50K]  -0.741169   0.977863  -0.758 0.448580
## household.income[50K-75K]  -2.179990   0.938724  -2.322 0.020327 *
## household.income[5K-12K]   -0.252260   1.111732  -0.227 0.820521
## household.income[75K-100K] -2.901924   0.952440  -3.047 0.002346 **
## high.educBachelor    1.460036   0.953666   1.531 0.125950
## high.educHS Diploma/GED -1.132091   0.981399  -1.154 0.248837
## high.educPost Graduate Degree 0.631452   0.953740   0.662 0.508004
## high.educSome College  0.869068   0.910466   0.955 0.339942
## PDS_score:putamen_posvsneg_feedback_z -0.118882   0.284791  -0.417 0.676410
## ---
## Signif. codes:  0 '***' 0.001 '**' 0.01 '*' 0.05 '.' 0.1 ' ' 1
##
##
## R-sq.(adj) =  0.0348
## lmer.REML = 11456  Scale est. = 15.398   n = 1842

##               stdcoef      stdse
## X(Intercept)    0.00000000 0.00000000
## XPDS_score      0.065524928 0.02439897
## Xputamen_posvsneg_feedback_z 0.018111216 0.06376336
## Xrace.ethnicity.5levelBlack -0.009062302 0.05919609
```

```

## Xrace.ethnicity.5levelMixed          0.071775090 0.06156629
## Xrace.ethnicity.5levelOther          0.007077695 0.04525963
## Xrace.ethnicity.5levelWhite          0.090109243 0.08099541
## Xdemo_race_hispanic1                 0.023484946 0.02832329
## Xinterview_age                       0.009327087 0.02314279
## Xbmi                                  0.017766438 0.02396693
## Xhousehold.income[>=200K]           -0.197117740 0.05909694
## Xhousehold.income[100K-200K]        -0.241966114 0.07919287
## Xhousehold.income[12K-16K]          -0.030117037 0.03097445
## Xhousehold.income[16K-25K]          -0.006037459 0.03725798
## Xhousehold.income[25K-35K]          -0.023219297 0.03889072
## Xhousehold.income[35K-50K]          -0.034792980 0.04590417
## Xhousehold.income[50K-75K]          -0.133360239 0.05742616
## Xhousehold.income[5K-12K]           -0.007380435 0.03252616
## Xhousehold.income[75K-100K]         -0.186325678 0.06115391
## Xhigh.educBachelor                   0.115189515 0.07523943
## Xhigh.educHS Diploma/GED            -0.047835610 0.04146824
## Xhigh.educPost Graduate Degree       0.055163881 0.08331914
## Xhigh.educSome College               0.066883311 0.07006929
## XPDS_score:putamen_posvsneg_feedback_z -0.026672989 0.06389751

```

#### 4.9 Model: CBCL internalizing factor ~ PDS x Lateral OFC activity (feedback stage)

##### Female participants

```

##
## Family: gaussian
## Link function: identity
##
## Formula:
## cbcl_scr_syn_internal_r ~ PDS_score * lOFC_posvsneg_feedback_z +
##   race.ethnicity.5level + demo_race_hispanic + interview_age +
##   bmi + household.income + high.educ
##
## Parametric coefficients:
##
##               Estimate Std. Error t value Pr(>|t|)
## (Intercept)    0.30976   2.43644   0.127 0.898847
## PDS_score       0.73791   0.19490   3.786 0.000158 ***
## lOFC_posvsneg_feedback_z
## -0.47278   0.58504  -0.808 0.419125
## race.ethnicity.5levelBlack
## -0.46824   0.89181  -0.525 0.599617
## race.ethnicity.5levelMixed
## 1.09005   0.85458   1.276 0.202283
## race.ethnicity.5levelOther
## -0.18063   1.02502  -0.176 0.860140
## race.ethnicity.5levelWhite
## 1.50079   0.79359   1.891 0.058766 .
## demo_race_hispanic1
## -0.22674   0.39222  -0.578 0.563272
## interview_age
## 0.02290   0.01748   1.310 0.190270
## bmi
## 0.02970   0.03483   0.853 0.393892
## household.income[>=200K]
## -2.21091   0.96851  -2.283 0.022557 *
## household.income[100K-200K]
## -1.20356   0.90400  -1.331 0.183231
## household.income[12K-16K]
## -0.03615   1.12546  -0.032 0.974382
## household.income[16K-25K]
## -1.37547   1.02896  -1.337 0.181471
## household.income[25K-35K]
## 0.51538   0.94793   0.544 0.586720
## household.income[35K-50K]
## -0.60480   0.92575  -0.653 0.513641

```

```

## household.income[50K-75K]          -0.98708    0.90800   -1.087  0.277140
## household.income[5K-12K]           0.21756    1.06901    0.204  0.838755
## household.income[75K-100K]         -0.93897    0.91516   -1.026  0.305022
## high.educBachelor                  -0.22976    0.83796   -0.274  0.783968
## high.educHS Diploma/GED           -0.33738    0.85104   -0.396  0.691831
## high.educPost Graduate Degree       0.19193    0.85135    0.225  0.821665
## high.educSome College               0.38717    0.78861    0.491  0.623516
## PDS_score:l0FC_posvsneg_feedback_z 0.32573    0.31273    1.042  0.297747
## ---
## Signif. codes:  0 '***' 0.001 '**' 0.01 '*' 0.05 '.' 0.1 ' ' 1
##
##
## R-sq.(adj) =  0.0253
## lmer.REML = 11333  Scale est. = 15.886    n = 1845

##
##                stdcoef      stdse
## X(Intercept)      0.00000000  0.00000000
## XPDS_score        0.099092405  0.02617261
## Xl0FC_posvsneg_feedback_z -0.044539210  0.05511440
## Xrace.ethnicity.5levelBlack -0.029432928  0.05605807
## Xrace.ethnicity.5levelMixed  0.067297449  0.05276021
## Xrace.ethnicity.5levelOther -0.006809098  0.03863965
## Xrace.ethnicity.5levelWhite  0.131022486  0.06928267
## Xdemo_race_hispanic1 -0.016350398  0.02828328
## Xinterview_age    0.031916936  0.02435909
## Xbmi              0.021094361  0.02473593
## Xhousehold.income[>=200K] -0.132623810  0.05809721
## Xhousehold.income[100K-200K] -0.105942582  0.07957357
## Xhousehold.income[12K-16K] -0.001038266  0.03232710
## Xhousehold.income[16K-25K] -0.048254901  0.03609869
## Xhousehold.income[25K-35K]  0.023105860  0.04249806
## Xhousehold.income[35K-50K] -0.031056443  0.04753734
## Xhousehold.income[50K-75K] -0.061828164  0.05687485
## Xhousehold.income[5K-12K]   0.006828368  0.03355201
## Xhousehold.income[75K-100K] -0.063277426  0.06167321
## Xhigh.educBachelor          -0.018882370  0.06886533
## Xhigh.educHS Diploma/GED   -0.016470914  0.04154764
## Xhigh.educPost Graduate Degree 0.017441471  0.07736771
## Xhigh.educSome College      0.030674759  0.06247953
## XPDS_score:l0FC_posvsneg_feedback_z 0.057541973  0.05524515

```

## Male participants

```

##
## Family: gaussian
## Link function: identity
##
## Formula:
## cbcl_scr_syn_internal_r ~ PDS_score * l0FC_posvsneg_feedback_z +
##   race.ethnicity.5level + demo_race_hispanic + interview_age +
##   bmi + household.income + high.educ
##
## Parametric coefficients:

```



```

##              Estimate Std. Error t value Pr(>|t|)
## (Intercept)      2.765864   2.575341   1.074  0.28298
## PDS_score        0.680451   0.269303   2.527  0.01160 *
## l0FC_posvsneg_feedback_z -0.114014   0.597849  -0.191  0.84878
## race.ethnicity.5levelBlack -0.123147   1.097982  -0.112  0.91071
## race.ethnicity.5levelMixed  1.281752   1.072352   1.195  0.23214
## race.ethnicity.5levelOther  0.175437   1.205705   0.146  0.88433
## race.ethnicity.5levelWhite  1.183077   1.011434   1.170  0.24228
## demo_race_hispanic1      0.405367   0.411223   0.986  0.32438
## interview_age         0.007728   0.017112   0.452  0.65158
## bmi                 0.026413   0.037148   0.711  0.47716
## household.income[>=200K] -3.100859   1.027892  -3.017  0.00259 **
## household.income[100K-200K] -2.631511   0.973503  -2.703  0.00693 **
## household.income[12K-16K]  -1.078124   1.228238  -0.878  0.38018
## household.income[16K-25K]   0.302518   1.076400   0.281  0.77871
## household.income[25K-35K]  -0.725125   1.058901  -0.685  0.49356
## household.income[35K-50K]  -0.561412   1.012343  -0.555  0.57926
## household.income[50K-75K]  -2.005423   0.976058  -2.055  0.04006 *
## household.income[5K-12K]   0.297411   1.133307   0.262  0.79302
## household.income[75K-100K] -2.730079   0.989004  -2.760  0.00583 **
## high.educBachelor         1.597982   0.950786   1.681  0.09300 .
## high.educHS Diploma/GED  -0.713699   0.980320  -0.728  0.46669
## high.educPost Graduate Degree  0.761277   0.950654   0.801  0.42336
## high.educSome College     1.022522   0.908486   1.126  0.26052
## PDS_score:l0FC_posvsneg_feedback_z 0.089986   0.404241   0.223  0.82387
## ---
## Signif. codes:  0 '***' 0.001 '**' 0.01 '*' 0.05 '.' 0.1 ' ' 1
##
##
## R-sq.(adj) =  0.0344
## lmer.REML = 11325  Scale est. = 15.384    n = 1824

##              stdcoef      stdse
## X(Intercept)      0.000000000  0.000000000
## XPDS_score        0.062061720  0.02456225
## Xl0FC_posvsneg_feedback_z -0.011042104  0.05790098
## Xrace.ethnicity.5levelBlack -0.006625664  0.05907462
## Xrace.ethnicity.5levelMixed  0.073716986  0.06167380
## Xrace.ethnicity.5levelOther  0.006659198  0.04576580
## Xrace.ethnicity.5levelWhite  0.095257415  0.08143729
## Xdemo_race_hispanic1      0.028238200  0.02864616
## Xinterview_age         0.010498372  0.02324510
## Xbmi                 0.017124772  0.02408464
## Xhousehold.income[>=200K] -0.185701085  0.06155735
## Xhousehold.income[100K-200K] -0.223397577  0.08264389
## Xhousehold.income[12K-16K]  -0.027928395  0.03181705
## Xhousehold.income[16K-25K]   0.010688379  0.03803071
## Xhousehold.income[25K-35K]  -0.027524095  0.04019347
## Xhousehold.income[35K-50K]  -0.026675643  0.04810174
## Xhousehold.income[50K-75K]  -0.123924861  0.06031536
## Xhousehold.income[5K-12K]   0.008863743  0.03377590
## Xhousehold.income[75K-100K] -0.176753450  0.06403106
## Xhigh.educBachelor         0.126680877  0.07537408
## Xhigh.educHS Diploma/GED  -0.029902354  0.04107316

```

```
## Xhigh.educPost Graduate Degree      0.066824424 0.08344789
## Xhigh.educSome College              0.078940212 0.07013646
## XPDS_score:mOFC_posvsneg_feedback_z 0.012944343 0.05814925
```

#### 4.10 Model: CBCL internalizing factor ~ PDS x Medial OFC activity (feedback stage)

##### Female participants

```
##
## Family: gaussian
## Link function: identity
##
## Formula:
## cbcl_scr_syn_internal_r ~ PDS_score * mOFC_posvsneg_feedback_z +
##   race.ethnicity.5level + demo_race_hispanic + interview_age +
##   bmi + household.income + high.educ
##
## Parametric coefficients:
##
##               Estimate Std. Error t value Pr(>|t|)
## (Intercept)      0.38712    2.43162   0.159  0.8735
## PDS_score         0.76028    0.19404   3.918 9.25e-05 ***
## mOFC_posvsneg_feedback_z
## -0.50792    0.50771  -1.000  0.3172
## race.ethnicity.5levelBlack
## -0.44012    0.89170  -0.494  0.6217
## race.ethnicity.5levelMixed
##  1.10747    0.85501   1.295  0.1954
## race.ethnicity.5levelOther
## -0.16579    1.02495  -0.162  0.8715
## race.ethnicity.5levelWhite
##  1.52923    0.79407   1.926  0.0543 .
## demo_race_hispanic1
## -0.23353    0.39138  -0.597  0.5508
## interview_age
##  0.02070    0.01742   1.188  0.2349
## bmi
##  0.03224    0.03473   0.928  0.3535
## household.income[>=200K]
## -2.12483    0.96950  -2.192  0.0285 *
## household.income[100K-200K]
## -1.09009    0.90505  -1.204  0.2286
## household.income[12K-16K]
##  0.02058    1.12426   0.018  0.9854
## household.income[16K-25K]
## -1.25048    1.03215  -1.212  0.2258
## household.income[25K-35K]
##  0.53796    0.94739   0.568  0.5702
## household.income[35K-50K]
## -0.57381    0.92545  -0.620  0.5353
## household.income[50K-75K]
## -0.92159    0.90757  -1.015  0.3100
## household.income[5K-12K]
##  0.22099    1.07020   0.206  0.8364
## household.income[75K-100K]
## -0.87021    0.91625  -0.950  0.3424
## high.educBachelor
## -0.22513    0.83778  -0.269  0.7882
## high.educHS Diploma/GED
## -0.35398    0.85094  -0.416  0.6775
## high.educPost Graduate Degree
##  0.19295    0.85138   0.227  0.8207
## high.educSome College
##  0.40759    0.78890   0.517  0.6055
## PDS_score:mOFC_posvsneg_feedback_z
##  0.48424    0.27660   1.751  0.0802 .
## ---
## Signif. codes:  0 '***' 0.001 '**' 0.01 '*' 0.05 '.' 0.1 ' ' 1
##
##
## R-sq.(adj) =  0.0277
## lmer.REML = 11355  Scale est. = 15.46    n = 1849
##
##               stdcoef      stdse
## X(Intercept)  0.000000000 0.000000000
```

```

## XPDS_score                0.1019066245 0.02600872
## XmOFC_posvsneg_feedback_z -0.0562070018 0.05618424
## Xrace.ethnicity.5levelBlack -0.0276202527 0.05595960
## Xrace.ethnicity.5levelMixed  0.0683864679 0.05279737
## Xrace.ethnicity.5levelOther -0.0062387519 0.03856936
## Xrace.ethnicity.5levelWhite  0.1333923375 0.06926541
## Xdemo_race_hispanic1       -0.0168524509 0.02824311
## Xinterview_age             0.0288307901 0.02426517
## Xbmi                       0.0228770706 0.02464973
## Xhousehold.income[>=200K]  -0.1272491656 0.05806013
## Xhousehold.income[100K-200K] -0.0958717683 0.07959826
## Xhousehold.income[12K-16K]   0.0005899695 0.03223538
## Xhousehold.income[16K-25K]  -0.0437928490 0.03614674
## Xhousehold.income[25K-35K]   0.0241749399 0.04257404
## Xhousehold.income[35K-50K]  -0.0295892879 0.04772147
## Xhousehold.income[50K-75K]  -0.0578352250 0.05695545
## Xhousehold.income[5K-12K]    0.0068611262 0.03322729
## Xhousehold.income[75K-100K] -0.0584662434 0.06155922
## Xhigh.educBachelor          -0.0184994480 0.06884323
## Xhigh.educHS Diploma/GED   -0.0172518476 0.04147154
## Xhigh.educPost Graduate Degree 0.0175194719 0.07730452
## Xhigh.educSome College      0.0322706153 0.06246032
## XPDS_score:mOFC_posvsneg_feedback_z 0.0980655061 0.05601652

```

## Male participants

```

##
## Family: gaussian
## Link function: identity
##
## Formula:
## cbcl_scr_syn_internal_r ~ PDS_score * mOFC_posvsneg_feedback_z +
##   race.ethnicity.5level + demo_race_hispanic + interview_age +
##   bmi + household.income + high.educ
##
## Parametric coefficients:
##
##               Estimate Std. Error t value Pr(>|t|)
## (Intercept)    2.705284   2.564134   1.055  0.29154
## PDS_score      0.683700   0.267118   2.560  0.01056 *
## mOFC_posvsneg_feedback_z -0.152095   0.513581  -0.296  0.76715
## race.ethnicity.5levelBlack -0.155619   1.095354  -0.142  0.88704
## race.ethnicity.5levelMixed  1.314353   1.069340   1.229  0.21918
## race.ethnicity.5levelOther  0.206730   1.201419   0.172  0.86340
## race.ethnicity.5levelWhite  1.196304   1.009303   1.185  0.23606
## demo_race_hispanic1      0.386342   0.408376   0.946  0.34425
## interview_age    0.008476   0.017047   0.497  0.61910
## bmi              0.026992   0.036941   0.731  0.46506
## household.income[>=200K]  -3.116839   1.018219  -3.061  0.00224 **
## household.income[100K-200K] -2.643988   0.963617  -2.744  0.00613 **
## household.income[12K-16K]  -1.006278   1.210510  -0.831  0.40592
## household.income[16K-25K]   0.258988   1.057312   0.245  0.80652
## household.income[25K-35K]  -0.734954   1.049556  -0.700  0.48386
## household.income[35K-50K]  -0.560274   1.002724  -0.559  0.57640

```

```

## household.income[50K-75K]          -2.041856    0.965917   -2.114    0.03466 *
## household.income[5K-12K]           0.270213    1.124088    0.240    0.81006
## household.income[75K-100K]        -2.739494    0.978903   -2.799    0.00519 **
## high.educBachelor                  1.547156    0.940430    1.645    0.10011
## high.educHS Diploma/GED           -0.744965    0.969281   -0.769    0.44225
## high.educPost Graduate Degree       0.731263    0.940295    0.778    0.43685
## high.educSome College               0.986081    0.896981    1.099    0.27177
## PDS_score:m0FC_posvsneg_feedback_z 0.006311    0.355274    0.018    0.98583
## ---
## Signif. codes:  0 '***' 0.001 '**' 0.01 '*' 0.05 '.' 0.1 ' ' 1
##
##
## R-sq.(adj) =  0.0344
## lmer.REML = 11375  Scale est. = 15.322    n = 1833

##
##                stdcoef      stdse
## X(Intercept)      0.00000000  0.00000000
## XPDS_score        0.062345059  0.02435787
## Xm0FC_posvsneg_feedback_z -0.017610891  0.05946685
## Xrace.ethnicity.5levelBlack -0.008409815  0.05919395
## Xrace.ethnicity.5levelMixed  0.076024307  0.06185233
## Xrace.ethnicity.5levelOther  0.007885779  0.04582840
## Xrace.ethnicity.5levelWhite  0.096689985  0.08157578
## Xdemo_race_hispanic1  0.027031556  0.02857319
## Xinterview_age    0.011533747  0.02319698
## Xbmi              0.017539365  0.02400376
## Xhousehold.income[>=200K] -0.186597126  0.06095815
## Xhousehold.income[100K-200K] -0.224849269  0.08194762
## Xhousehold.income[12K-16K] -0.026375242  0.03172831
## Xhousehold.income[16K-25K]  0.009320622  0.03805127
## Xhousehold.income[25K-35K] -0.027881369  0.03981621
## Xhousehold.income[35K-50K] -0.026608669  0.04762160
## Xhousehold.income[50K-75K] -0.126139135  0.05967114
## Xhousehold.income[5K-12K]   0.008048181  0.03348054
## Xhousehold.income[75K-100K] -0.177577488  0.06345371
## Xhigh.educBachelor          0.122916317  0.07471400
## Xhigh.educHS Diploma/GED   -0.031333346  0.04076809
## Xhigh.educPost Graduate Degree 0.064251188  0.08261742
## Xhigh.educSome College      0.076362645  0.06946275
## XPDS_score:m0FC_posvsneg_feedback_z 0.001058222  0.05957656

```

#### 4.11 Model: CBCL internalizing factor ~ PDS x BIS-BAS

##### Female participants

```

##
## Family: gaussian
## Link function: identity
##
## Formula:
## cbcl_scr_syn_internal_r ~ PDS_score * bisbas_ss_basm_rr + race.ethnicity.5level +
##   demo_race_hispanic + interview_age + bmi + household.income +
##   high.educ

```

```

##
## Parametric coefficients:
##
##           Estimate Std. Error t value Pr(>|t|)
## (Intercept)      -1.964742   2.316890  -0.848  0.39652
## PDS_score         2.291122   0.572318   4.003 6.44e-05 ***
## bisbas_ss_basm_rr  0.270771   0.112787   2.401  0.01644 *
## race.ethnicity.5levelBlack -0.480223   0.801906  -0.599  0.54933
## race.ethnicity.5levelMixed  1.182151   0.779342   1.517  0.12944
## race.ethnicity.5levelOther -0.142460   0.912020  -0.156  0.87589
## race.ethnicity.5levelWhite  1.176660   0.726192   1.620  0.10530
## demo_race_hispanic1  0.041940   0.348870   0.120  0.90432
## interview_age     0.021133   0.015491   1.364  0.17265
## bmi               0.022214   0.030695   0.724  0.46931
## household.income[>=200K] -2.536212   0.839799  -3.020  0.00255 **
## household.income[100K-200K] -1.589044   0.781394  -2.034  0.04210 *
## household.income[12K-16K]  -0.175324   1.001862  -0.175  0.86110
## household.income[16K-25K]  -1.301729   0.865942  -1.503  0.13291
## household.income[25K-35K]   0.034045   0.817465   0.042  0.96678
## household.income[35K-50K]  -1.233934   0.793966  -1.554  0.12028
## household.income[50K-75K]  -1.240914   0.778372  -1.594  0.11102
## household.income[5K-12K]   -0.009487   0.878712  -0.011  0.99139
## household.income[75K-100K] -1.305847   0.792143  -1.648  0.09938 .
## high.educBachelor         0.838193   0.726124   1.154  0.24848
## high.educHS Diploma/GED   0.673239   0.729377   0.923  0.35608
## high.educPost Graduate Degree 1.254149   0.740103   1.695  0.09029 .
## high.educSome College     1.121949   0.677781   1.655  0.09799 .
## PDS_score:bisbas_ss_basm_rr -0.185901   0.061830  -3.007  0.00267 **
## ---
## Signif. codes:  0 '***' 0.001 '**' 0.01 '*' 0.05 '.' 0.1 ' ' 1
##
##
## R-sq.(adj) =  0.0242
## lmer.REML = 14690 Scale est. = 17.387    n = 2386

##
##           stdcoef      stdse
## X(Intercept)      0.000000000 0.00000000
## XPDS_score        0.3090182126 0.07719221
## Xbisbas_ss_basm_rr 0.1198830949 0.04993597
## Xrace.ethnicity.5levelBlack -0.0320626833 0.05354020
## Xrace.ethnicity.5levelMixed  0.0717270701 0.04728661
## Xrace.ethnicity.5levelOther -0.0054991619 0.03520531
## Xrace.ethnicity.5levelWhite  0.1037995012 0.06406128
## Xdemo_race_hispanic1 0.0030015000 0.02496745
## Xinterview_age     0.0292235831 0.02142233
## Xbmi               0.0157925604 0.02182122
## Xhousehold.income[>=200K] -0.1491902988 0.04940038
## Xhousehold.income[100K-200K] -0.1380421585 0.06788063
## Xhousehold.income[12K-16K]  -0.0048419230 0.02766841
## Xhousehold.income[16K-25K]  -0.0482043951 0.03206672
## Xhousehold.income[25K-35K]   0.0015151870 0.03638185
## Xhousehold.income[35K-50K]  -0.0650546439 0.04185893
## Xhousehold.income[50K-75K]  -0.0791406468 0.04964148
## Xhousehold.income[5K-12K]   -0.0003301899 0.03058376
## Xhousehold.income[75K-100K] -0.0864933352 0.05246797

```

```

## Xhigh.educBachelor          0.0686455633 0.05946745
## Xhigh.educHS Diploma/GED   0.0336804238 0.03648884
## Xhigh.educPost Graduate Degree 0.1126989789 0.06650635
## Xhigh.educSome College     0.0899320017 0.05432890
## XPDS_score:bisbas_ss_basm_rr -0.2721088169 0.09050284

```

### Male participants

```

##
## Family: gaussian
## Link function: identity
##
## Formula:
## cbcl_scr_syn_internal_r ~ PDS_score * bisbas_ss_basm_rr + race.ethnicity.5level +
##   demo_race_hispanic + interview_age + bmi + household.income +
##   high.educ
##
## Parametric coefficients:
##
##               Estimate Std. Error t value Pr(>|t|)
## (Intercept)    2.437716   2.424760   1.005 0.314828
## PDS_score      1.561503   0.850373   1.836 0.066437 .
## bisbas_ss_basm_rr 0.055658   0.127344   0.437 0.662101
## race.ethnicity.5levelBlack -0.695545   0.876734  -0.793 0.427656
## race.ethnicity.5levelMixed  1.081876   0.856435   1.263 0.206622
## race.ethnicity.5levelOther -0.048561   0.974318  -0.050 0.960253
## race.ethnicity.5levelWhite  0.853462   0.806188   1.059 0.289865
## demo_race_hispanic1  0.154129   0.349637   0.441 0.659377
## interview_age    0.008173   0.014709   0.556 0.578502
## bmi             0.038892   0.030298   1.284 0.199379
## household.income[>=200K] -3.196990   0.817881  -3.909 9.52e-05 ***
## household.income[100K-200K] -2.514059   0.762064  -3.299 0.000984 ***
## household.income[12K-16K]  -0.397658   0.983428  -0.404 0.685983
## household.income[16K-25K]   0.075379   0.819508   0.092 0.926721
## household.income[25K-35K]  -0.016679   0.821088  -0.020 0.983795
## household.income[35K-50K]  -1.118032   0.778295  -1.437 0.150979
## household.income[50K-75K]  -1.610669   0.754803  -2.134 0.032947 *
## household.income[5K-12K]    0.012167   0.858481   0.014 0.988693
## household.income[75K-100K] -2.697662   0.776628  -3.474 0.000522 ***
## high.educBachelor    1.571194   0.769805   2.041 0.041351 *
## high.educHS Diploma/GED -0.775980   0.762577  -1.018 0.308977
## high.educPost Graduate Degree 0.827979   0.772584   1.072 0.283956
## high.educSome College  1.034236   0.731760   1.413 0.157674
## PDS_score:bisbas_ss_basm_rr -0.110327   0.089659  -1.231 0.218619
## ---
## Signif. codes:  0 '***' 0.001 '**' 0.01 '*' 0.05 '.' 0.1 ' ' 1
##
##
## R-sq.(adj) =  0.0362
## lmer.REML = 15928  Scale est. = 17.36    n = 2559

##
##               stdcoef      stdse
## X(Intercept)    0.000000000 0.0000000
## XPDS_score      0.1522351501 0.08290513

```

```

## Xbisbas_ss_basm_rr          0.0227285829 0.05200276
## Xrace.ethnicity.5levelBlack -0.0405680496 0.05113596
## Xrace.ethnicity.5levelMixed  0.0631882989 0.05002112
## Xrace.ethnicity.5levelOther  -0.0018252920 0.03662261
## Xrace.ethnicity.5levelWhite  0.0704034365 0.06650372
## Xdemo_race_hispanic1        0.0107999960 0.02449952
## Xinterview_age              0.0109896647 0.01977819
## Xbmi                        0.0262234317 0.02042868
## Xhousehold.income[>=200K]   -0.1856883480 0.04750437
## Xhousehold.income[100K-200K] -0.2091460066 0.06339649
## Xhousehold.income[12K-16K]  -0.0102021261 0.02523037
## Xhousehold.income[16K-25K]   0.0028333247 0.03080363
## Xhousehold.income[25K-35K]  -0.0006608686 0.03253429
## Xhousehold.income[35K-50K]  -0.0552475222 0.03845941
## Xhousehold.income[50K-75K]  -0.1003127513 0.04700923
## Xhousehold.income[5K-12K]    0.0003936045 0.02777120
## Xhousehold.income[75K-100K] -0.1719741245 0.04950950
## Xhigh.educBachelor           0.1232406557 0.06038164
## Xhigh.educHS Diploma/GED    -0.0367512102 0.03611646
## Xhigh.educPost Graduate Degree 0.0714830729 0.06670058
## Xhigh.educSome College       0.0809261067 0.05725817
## XPDS_score:bisbas_ss_basm_rr -0.1197052410 0.09728080

```

#### 4.12 Model: CBCL internalizing factor ~ PDS x MID reaction time (large reward vs. neutral)

##### Female participants

```

##
## Family: gaussian
## Link function: identity
##
## Formula:
## cbcl_scr_syn_internal_r ~ PDS_score * rt_diff_large_neutral_z +
##   race.ethnicity.5level + demo_race_hispanic + interview_age +
##   bmi + household.income + high.educ
##
## Parametric coefficients:
##
##               Estimate Std. Error t value Pr(>|t|)
## (Intercept)    0.483412   2.328269   0.208   0.8355
## PDS_score      0.855324   0.187590   4.560 5.44e-06 ***
## rt_diff_large_neutral_z 0.180991   0.322271   0.562   0.5744
## race.ethnicity.5levelBlack -0.810916   0.856497  -0.947   0.3439
## race.ethnicity.5levelMixed  0.721284   0.825769   0.873   0.3825
## race.ethnicity.5levelOther  -0.385265   0.964903  -0.399   0.6897
## race.ethnicity.5levelWhite  1.173062   0.768815   1.526   0.1272
## demo_race_hispanic1 -0.091549   0.377055  -0.243   0.8082
## interview_age    0.021268   0.016845   1.263   0.2069
## bmi              0.021758   0.032986   0.660   0.5096
## household.income[>=200K] -1.989396   0.923212  -2.155   0.0313 *
## household.income[100K-200K] -1.121947   0.860960  -1.303   0.1927
## household.income[12K-16K]   0.006039   1.085815   0.006   0.9956
## household.income[16K-25K]  -1.085341   0.960839  -1.130   0.2588

```

```

## household.income[25K-35K]          0.687445   0.901306   0.763   0.4457
## household.income[35K-50K]         -0.594679   0.876094  -0.679   0.4974
## household.income[50K-75K]         -0.931958   0.860126  -1.084   0.2787
## household.income[5K-12K]          0.750464   1.011357   0.742   0.4582
## household.income[75K-100K]        -0.901655   0.873943  -1.032   0.3023
## high.educBachelor                  -0.043493   0.791524  -0.055   0.9562
## high.educHS Diploma/GED          -0.136944   0.804438  -0.170   0.8648
## high.educPost Graduate Degree      0.369040   0.806417   0.458   0.6473
## high.educSome College              0.572753   0.743359   0.770   0.4411
## PDS_score:rt_diff_large_neutral_z -0.049630   0.177514  -0.280   0.7798
## ---
## Signif. codes:  0 '***' 0.001 '**' 0.01 '*' 0.05 '.' 0.1 ' ' 1
##
##
## R-sq.(adj) =  0.0274
## lmer.REML = 12297  Scale est. = 17.028   n = 2001

##
##                stdcoef      stdse
## X(Intercept)      0.000000000 0.00000000
## XPDS_score        0.1134343877 0.02487851
## Xrt_diff_large_neutral_z 0.0312011385 0.05555635
## Xrace.ethnicity.5levelBlack -0.0516711524 0.05457557
## Xrace.ethnicity.5levelMixed 0.0445684357 0.05102462
## Xrace.ethnicity.5levelOther -0.0153085199 0.03834042
## Xrace.ethnicity.5levelWhite 0.1030428186 0.06753342
## Xdemo_race_hispanic1 -0.0066286652 0.02730090
## Xinterview_age    0.0294057792 0.02329089
## Xbmi              0.0155220774 0.02353166
## Xhousehold.income[>=200K] -0.1186398849 0.05505675
## Xhousehold.income[100K-200K] -0.0983707116 0.07548775
## Xhousehold.income[12K-16K] 0.0001682809 0.03025509
## Xhousehold.income[16K-25K] -0.0397694456 0.03520742
## Xhousehold.income[25K-35K] 0.0306992988 0.04024974
## Xhousehold.income[35K-50K] -0.0311542067 0.04589705
## Xhousehold.income[50K-75K] -0.0588270667 0.05429289
## Xhousehold.income[5K-12K] 0.0236031988 0.03180865
## Xhousehold.income[75K-100K] -0.0597648842 0.05792801
## Xhigh.educBachelor -0.0035789618 0.06513260
## Xhigh.educHS Diploma/GED -0.0066634878 0.03914277
## Xhigh.educPost Graduate Degree 0.0333594981 0.07289622
## Xhigh.educSome College 0.0455687147 0.05914231
## XPDS_score:rt_diff_large_neutral_z -0.0155201778 0.05551163

```

## Male participants

```

##
## Family: gaussian
## Link function: identity
##
## Formula:
## cbcl_scr_syn_internal_r ~ PDS_score * rt_diff_large_neutral_z +
##   race.ethnicity.5level + demo_race_hispanic + interview_age +
##   bmi + household.income + high.educ

```



```

##
## Parametric coefficients:
##
##           Estimate Std. Error t value Pr(>|t|)
## (Intercept)      1.750814   2.438546   0.718  0.47286
## PDS_score         0.713788   0.244639   2.918  0.00356 **
## rt_diff_large_neutral_z
## race.ethnicity.5levelBlack -0.711053   1.051563  -0.676  0.49900
## race.ethnicity.5levelMixed  0.766583   1.030263   0.744  0.45692
## race.ethnicity.5levelOther -0.182190   1.146920  -0.159  0.87380
## race.ethnicity.5levelWhite  0.799698   0.972742   0.822  0.41111
## demo_race_hispanic1       0.202015   0.389428   0.519  0.60399
## interview_age          0.009153   0.016173   0.566  0.57147
## bmi                   0.040581   0.034733   1.168  0.24279
## household.income[>=200K] -2.522586   0.940886  -2.681  0.00740 **
## household.income[100K-200K] -2.071642   0.886966  -2.336  0.01961 *
## household.income[12K-16K]   0.345890   1.114246   0.310  0.75627
## household.income[16K-25K]   0.813649   0.971631   0.837  0.40246
## household.income[25K-35K]   0.194017   0.959768   0.202  0.83982
## household.income[35K-50K]  -0.080480   0.907634  -0.089  0.92935
## household.income[50K-75K]  -1.194339   0.883090  -1.352  0.17638
## household.income[5K-12K]    0.578763   1.025258   0.565  0.57247
## household.income[75K-100K] -2.120489   0.902491  -2.350  0.01889 *
## high.educBachelor          1.923476   0.895775   2.147  0.03189 *
## high.educHS Diploma/GED    -0.059677   0.904250  -0.066  0.94739
## high.educPost Graduate Degree 1.152730   0.895154   1.288  0.19798
## high.educSome College      1.191013   0.851205   1.399  0.16190
## PDS_score:rt_diff_large_neutral_z -0.795264   0.254145  -3.129  0.00178 **
## ---
## Signif. codes:  0 '***' 0.001 '**' 0.01 '*' 0.05 '.' 0.1 ' ' 1
##
##
## R-sq.(adj) =  0.0373
## lmer.REML = 12711 Scale est. = 13.784    n = 2048

##
##           stdcoef      stdse
## X(Intercept)      0.000000000 0.000000000
## XPDS_score        0.067580199 0.023162000
## Xrt_diff_large_neutral_z
## Xrace.ethnicity.5levelBlack -0.039348580 0.058191900
## Xrace.ethnicity.5levelMixed  0.044153226 0.059340490
## Xrace.ethnicity.5levelOther -0.006896019 0.043411720
## Xrace.ethnicity.5levelWhite  0.064787225 0.078806310
## Xdemo_race_hispanic1       0.014091280 0.027164050
## Xinterview_age         0.012421459 0.021946660
## Xbmi                 0.026518715 0.022696890
## Xhousehold.income[>=200K] -0.149643755 0.055814860
## Xhousehold.income[100K-200K] -0.174577460 0.074744730
## Xhousehold.income[12K-16K]   0.008980739 0.028930410
## Xhousehold.income[16K-25K]   0.029546432 0.035283270
## Xhousehold.income[25K-35K]   0.007487446 0.037039000
## Xhousehold.income[35K-50K]  -0.003976095 0.044841610
## Xhousehold.income[50K-75K]  -0.074133045 0.054813710
## Xhousehold.income[5K-12K]    0.017477638 0.030961030
## Xhousehold.income[75K-100K] -0.135913743 0.057845600

```

```

## Xhigh.educBachelor          0.150575723 0.07012409
## Xhigh.educHS Diploma/GED   -0.002624143 0.03976231
## Xhigh.educPost Graduate Degree 0.101100893 0.07851005
## Xhigh.educSome College      0.092591022 0.06617391
## XPDS_score:rt_diff_large_neutral_z -0.182637233 0.05836586

```

#### 4.13 Model: CBCL internalizing factor ~ PDS x MID reaction time (large vs. small reward)

##### Female participants

```

##
## Family: gaussian
## Link function: identity
##
## Formula:
## cbcl_scr_syn_internal_r ~ PDS_score * rt_diff_large_small_z +
##   race.ethnicity.5level + demo_race_hispanic + interview_age +
##   bmi + household.income + high.educ
##
## Parametric coefficients:
##
##           Estimate Std. Error t value Pr(>|t|)
## (Intercept)      0.465158   2.326515   0.200  0.8415
## PDS_score         0.853732   0.187588   4.551 5.66e-06 ***
## rt_diff_large_small_z 0.256418   0.302976   0.846  0.3975
## race.ethnicity.5levelBlack -0.795268   0.856419  -0.929  0.3532
## race.ethnicity.5levelMixed  0.737366   0.825822   0.893  0.3720
## race.ethnicity.5levelOther -0.359183   0.964589  -0.372  0.7097
## race.ethnicity.5levelWhite  1.191243   0.768466   1.550  0.1213
## demo_race_hispanic1 -0.098777   0.376948  -0.262  0.7933
## interview_age      0.021482   0.016833   1.276  0.2021
## bmi                0.020974   0.032996   0.636  0.5251
## household.income[>=200K] -1.993381   0.923763  -2.158  0.0311 *
## household.income[100K-200K] -1.136227   0.860969  -1.320  0.1871
## household.income[12K-16K]  -0.002076   1.086360  -0.002  0.9985
## household.income[16K-25K]  -1.107996   0.961274  -1.153  0.2492
## household.income[25K-35K]   0.693545   0.902131   0.769  0.4421
## household.income[35K-50K]  -0.620326   0.875512  -0.709  0.4787
## household.income[50K-75K]  -0.940366   0.860516  -1.093  0.2746
## household.income[5K-12K]    0.748959   1.011491   0.740  0.4591
## household.income[75K-100K] -0.911658   0.873901  -1.043  0.2970
## high.educBachelor      -0.039829   0.790783  -0.050  0.9598
## high.educHS Diploma/GED -0.134607   0.803768  -0.167  0.8670
## high.educPost Graduate Degree 0.379282   0.805965   0.471  0.6380
## high.educSome College    0.591246   0.742842   0.796  0.4262
## PDS_score:rt_diff_large_small_z -0.085706   0.167808  -0.511  0.6096
## ---
## Signif. codes:  0 '***' 0.001 '**' 0.01 '*' 0.05 '.' 0.1 ' ' 1
##
##
## R-sq.(adj) = 0.0276
## lmer.REML = 12297 Scale est. = 16.964 n = 2001

```

```

##                                stdcoef      stdse
## X(Intercept)                   0.000000e+00 0.00000000
## XPDS_score                      1.132232e-01 0.02487819
## Xrt_diff_large_small_z         4.601239e-02 0.05436674
## Xrace.ethnicity.5levelBlack    -5.067406e-02 0.05457058
## Xrace.ethnicity.5levelMixed     4.556215e-02 0.05102789
## Xrace.ethnicity.5levelOther    -1.427215e-02 0.03832794
## Xrace.ethnicity.5levelWhite     1.046399e-01 0.06750278
## Xdemo_race_hispanic1          -7.152033e-03 0.02729315
## Xinterview_age                  2.970139e-02 0.02327416
## Xbmi                             1.496306e-02 0.02353906
## Xhousehold.income[>=200K]      -1.188775e-01 0.05508961
## Xhousehold.income[100K-200K]   -9.962276e-02 0.07548858
## Xhousehold.income[12K-16K]     -5.785645e-05 0.03027028
## Xhousehold.income[16K-25K]     -4.059959e-02 0.03522336
## Xhousehold.income[25K-35K]      3.097171e-02 0.04028657
## Xhousehold.income[35K-50K]     -3.249784e-02 0.04586659
## Xhousehold.income[50K-75K]     -5.935781e-02 0.05431751
## Xhousehold.income[5K-12K]       2.355586e-02 0.03181288
## Xhousehold.income[75K-100K]    -6.042789e-02 0.05792527
## Xhigh.educBachelor              -3.277438e-03 0.06507160
## Xhigh.educHS Diploma/GED       -6.549760e-03 0.03911016
## Xhigh.educPost Graduate Degree  3.428531e-02 0.07285536
## Xhigh.educSome College          4.704006e-02 0.05910121
## XPDS_score:rt_diff_large_small_z -2.782374e-02 0.05447761

```

## Male participants

```

##
## Family: gaussian
## Link function: identity
##
## Formula:
## cbcl_scr_syn_internal_r ~ PDS_score * rt_diff_large_small_z +
##   race.ethnicity.5level + demo_race_hispanic + interview_age +
##   bmi + household.income + high.educ
##
## Parametric coefficients:
##                                Estimate Std. Error t value Pr(>|t|)
## (Intercept)                    1.870093   2.442116   0.766  0.44390
## PDS_score                       0.706754   0.245997   2.873  0.00411 **
## rt_diff_large_small_z           0.350585   0.352886   0.993  0.32059
## race.ethnicity.5levelBlack      -0.755140   1.053667  -0.717  0.47366
## race.ethnicity.5levelMixed       0.640032   1.031413   0.621  0.53497
## race.ethnicity.5levelOther      -0.196229   1.149751  -0.171  0.86450
## race.ethnicity.5levelWhite       0.684948   0.974263   0.703  0.48211
## demo_race_hispanic1             0.220485   0.390379   0.565  0.57227
## interview_age                   0.008129   0.016188   0.502  0.61561
## bmi                              0.041499   0.034804   1.192  0.23326
## household.income[>=200K]        -2.452020   0.942582  -2.601  0.00935 **
## household.income[100K-200K]     -2.008295   0.888780  -2.260  0.02395 *
## household.income[12K-16K]        0.261321   1.116560   0.234  0.81498
## household.income[16K-25K]        0.925416   0.973383   0.951  0.34186

```

```

## household.income[25K-35K]      0.264859  0.962166  0.275  0.78313
## household.income[35K-50K]      0.023691  0.908774  0.026  0.97920
## household.income[50K-75K]     -1.114897  0.884676 -1.260  0.20773
## household.income[5K-12K]       0.723915  1.026440  0.705  0.48072
## household.income[75K-100K]    -2.037157  0.904216 -2.253  0.02437 *
## high.educBachelor              1.949119  0.897641  2.171  0.03002 *
## high.educHS Diploma/GED       -0.071330  0.906263 -0.079  0.93727
## high.educPost Graduate Degree   1.186178  0.896976  1.322  0.18618
## high.educSome College          1.216411  0.853046  1.426  0.15403
## PDS_score:rt_diff_large_small_z -0.332939  0.251496 -1.324  0.18571
## ---
## Signif. codes:  0 '***' 0.001 '**' 0.01 '*' 0.05 '.' 0.1 ' ' 1
##
##
## R-sq.(adj) =  0.0336
## lmer.REML = 12719  Scale est. = 13.792    n = 2048

##                stdcoef      stdse
## X(Intercept)      0.00000000  0.00000000
## XPDS_score        0.066914196  0.02329061
## Xrt_diff_large_small_z 0.056712021  0.05708419
## Xrace.ethnicity.5levelBlack -0.041788288  0.05830833
## Xrace.ethnicity.5levelMixed  0.036864196  0.05940672
## Xrace.ethnicity.5levelOther -0.007427417  0.04351889
## Xrace.ethnicity.5levelWhite  0.055490830  0.07892951
## Xdemo_race_hispanic1  0.015379634  0.02723037
## Xinterview_age     0.011031075  0.02196707
## Xbmi                0.027118168  0.02274338
## Xhousehold.income[>=200K] -0.145457686  0.05591547
## Xhousehold.income[100K-200K] -0.169239163  0.07489760
## Xhousehold.income[12K-16K]   0.006784967  0.02899049
## Xhousehold.income[16K-25K]   0.033605073  0.03534690
## Xhousehold.income[25K-35K]   0.010221318  0.03713152
## Xhousehold.income[35K-50K]   0.001170467  0.04489793
## Xhousehold.income[50K-75K]  -0.069202059  0.05491216
## Xhousehold.income[5K-12K]    0.021860983  0.03099672
## Xhousehold.income[75K-100K] -0.130572555  0.05795614
## Xhigh.educBachelor          0.152583138  0.07027013
## Xhigh.educHS Diploma/GED    -0.003136557  0.03985083
## Xhigh.educPost Graduate Degree 0.104034481  0.07866989
## Xhigh.educSome College       0.094565569  0.06631704
## XPDS_score:rt_diff_large_small_z -0.076267999  0.05761143

```

#### 4.14 Model: CBCL internalizing factor ~ Testosterone x Accumbens activity (anticipation stage) + PDS

##### Female participants

```

## Warning: Some predictor variables are on very different scales: consider
## rescaling
##
## Family: gaussian

```

```

## Link function: identity
##
## Formula:
## cbcl_scr_syn_internal_r ~ PDS_score + hormone_sal_end_min_since_midnight +
##     hormone_scr_ert_mean * accumbens_rvsn_ant_z + race.ethnicity.5level +
##     demo_race_hispanic + interview_age + MRI_minus_hormone_date_time +
##     bmi + household.income + high.educ
##
## Parametric coefficients:
##
##           Estimate Std. Error t value
## (Intercept)      -9.452e-01  2.607e+00  -0.363
## PDS_score          8.551e-01  2.049e-01   4.173
## hormone_sal_end_min_since_midnight  8.284e-06  7.971e-04   0.010
## hormone_scr_ert_mean    -3.709e-03  8.177e-03  -0.454
## accumbens_rvsn_ant_z     5.906e-01  4.223e-01   1.398
## race.ethnicity.5levelBlack    -7.315e-01  9.032e-01  -0.810
## race.ethnicity.5levelMixed     8.865e-01  8.682e-01   1.021
## race.ethnicity.5levelOther    -5.864e-01  1.052e+00  -0.558
## race.ethnicity.5levelWhite     1.441e+00  8.030e-01   1.794
## demo_race_hispanic1    -1.305e-01  4.041e-01  -0.323
## interview_age           2.881e-02  1.812e-02   1.590
## MRI_minus_hormone_date_time    4.022e-05  1.635e-05   2.460
## bmi                   4.328e-02  3.677e-02   1.177
## household.income[>=200K]    -2.260e+00  9.943e-01  -2.273
## household.income[100K-200K]  -1.423e+00  9.238e-01  -1.540
## household.income[12K-16K]    -2.295e-01  1.154e+00  -0.199
## household.income[16K-25K]    -1.379e+00  1.061e+00  -1.300
## household.income[25K-35K]     1.957e-01  9.656e-01   0.203
## household.income[35K-50K]    -9.535e-01  9.437e-01  -1.010
## household.income[50K-75K]    -1.266e+00  9.306e-01  -1.360
## household.income[5K-12K]     -4.892e-01  1.124e+00  -0.435
## household.income[75K-100K]   -1.196e+00  9.340e-01  -1.281
## high.educBachelor           1.943e-01  8.811e-01   0.221
## high.educHS Diploma/GED     -9.843e-02  8.924e-01  -0.110
## high.educPost Graduate Degree  5.533e-01  8.958e-01   0.618
## high.educSome College        7.772e-01  8.294e-01   0.937
## hormone_scr_ert_mean:accumbens_rvsn_ant_z -2.352e-02  1.019e-02  -2.307
##
##           Pr(>|t|)
## (Intercept)           0.7169
## PDS_score              3.17e-05 ***
## hormone_sal_end_min_since_midnight    0.9917
## hormone_scr_ert_mean    0.6502
## accumbens_rvsn_ant_z     0.1622
## race.ethnicity.5levelBlack    0.4181
## race.ethnicity.5levelMixed    0.3074
## race.ethnicity.5levelOther    0.5772
## race.ethnicity.5levelWhite    0.0730 .
## demo_race_hispanic1    0.7467
## interview_age           0.1120
## MRI_minus_hormone_date_time    0.0140 *
## bmi                    0.2394
## household.income[>=200K]    0.0231 *
## household.income[100K-200K]  0.1236
## household.income[12K-16K]    0.8424

```

```

## household.income[16K-25K]          0.1937
## household.income[25K-35K]          0.8394
## household.income[35K-50K]          0.3124
## household.income[50K-75K]          0.1740
## household.income[5K-12K]           0.6636
## household.income[75K-100K]         0.2004
## high.educBachelor                   0.8255
## high.educHS Diploma/GED            0.9122
## high.educPost Graduate Degree       0.5369
## high.educSome College               0.3489
## hormone_scr_ert_mean:accumbens_rvsn_ant_z 0.0212 *
## ---
## Signif. codes:  0 '***' 0.001 '**' 0.01 '*' 0.05 '.' 0.1 ' ' 1
##
##
## R-sq.(adj) =  0.034
## lmer.REML = 10241  Scale est. = 15.403   n = 1669

##                                stdcoef      stdse
## X(Intercept)                    0.000000000 0.00000000
## XPDS_score                       0.1151112608 0.02758692
## Xhormone_sal_end_min_since_midnight 0.0002720458 0.02617698
## Xhormone_scr_ert_mean             -0.0117064595 0.02580958
## Xaccumbens_rvsn_ant_z             0.0762543368 0.05452845
## Xrace.ethnicity.5levelBlack       -0.0459208272 0.05669617
## Xrace.ethnicity.5levelMixed        0.0547477692 0.05361575
## Xrace.ethnicity.5levelOther       -0.0224145625 0.04020419
## Xrace.ethnicity.5levelWhite        0.1266115659 0.07057336
## Xdemo_race_hispanic1              -0.0095142098 0.02945521
## Xinterview_age                    0.0406630141 0.02557239
## XMRI_minus_hormone_date_time      0.0616490564 0.02505686
## Xbmi                              0.0304848054 0.02589956
## Xhousehold.income[>=200K]         -0.1356843159 0.05968578
## Xhousehold.income[100K-200K]      -0.1259578935 0.08176756
## Xhousehold.income[12K-16K]        -0.0066847311 0.03361981
## Xhousehold.income[16K-25K]        -0.0483096403 0.03715413
## Xhousehold.income[25K-35K]         0.0090970393 0.04488508
## Xhousehold.income[35K-50K]        -0.0502119472 0.04969435
## Xhousehold.income[50K-75K]        -0.0800874329 0.05888521
## Xhousehold.income[5K-12K]         -0.0145800978 0.03351037
## Xhousehold.income[75K-100K]       -0.0827618842 0.06461114
## Xhigh.educBachelor                 0.0162566505 0.07371651
## Xhigh.educHS Diploma/GED          -0.0048565056 0.04403192
## Xhigh.educPost Graduate Degree     0.0506997449 0.08208700
## Xhigh.educSome College             0.0620921719 0.06626686
## Xhormone_scr_ert_mean:accumbens_rvsn_ant_z -0.1257196343 0.05449009

```

## Male participants

```

## Warning: Some predictor variables are on very different scales: consider
## rescaling

```

```
##
```

```

## Family: gaussian
## Link function: identity
##
## Formula:
## cbcl_scr_syn_internal_r ~ PDS_score + hormone_sal_end_min_since_midnight +
##     hormone_scr_ert_mean * accumbens_rvsn_ant_z + race.ethnicity.5level +
##     demo_race_hispanic + interview_age + MRI_minus_hormone_date_time +
##     bmi + household.income + high.educ
##
## Parametric coefficients:
##
##             Estimate Std. Error t value
## (Intercept)      2.795e+00  2.702e+00   1.035
## PDS_score         7.937e-01  2.814e-01   2.821
## hormone_sal_end_min_since_midnight
## hormone_scr_ert_mean      7.709e-03  9.420e-03   0.818
## accumbens_rvsn_ant_z     -4.280e-03  4.302e-01  -0.010
## race.ethnicity.5levelBlack      3.156e-02  1.134e+00   0.028
## race.ethnicity.5levelMixed      1.216e+00  1.103e+00   1.102
## race.ethnicity.5levelOther      5.017e-01  1.240e+00   0.405
## race.ethnicity.5levelWhite      1.403e+00  1.041e+00   1.348
## demo_race_hispanic1      2.209e-03  4.247e-01   0.005
## interview_age      5.106e-03  1.763e-02   0.290
## MRI_minus_hormone_date_time      2.211e-05  1.873e-05   1.180
## bmi      1.978e-03  3.803e-02   0.052
## household.income[>=200K]     -3.043e+00  1.031e+00  -2.952
## household.income[100K-200K]    -2.609e+00  9.749e-01  -2.676
## household.income[12K-16K]     -5.410e-01  1.259e+00  -0.430
## household.income[16K-25K]      3.292e-01  1.073e+00   0.307
## household.income[25K-35K]     -8.012e-01  1.054e+00  -0.760
## household.income[35K-50K]     -6.506e-01  1.025e+00  -0.635
## household.income[50K-75K]     -2.069e+00  9.719e-01  -2.129
## household.income[5K-12K]      2.966e-01  1.120e+00   0.265
## household.income[75K-100K]    -2.703e+00  9.932e-01  -2.722
## high.educBachelor      1.107e+00  9.827e-01   1.126
## high.educHS Diploma/GED     -1.117e+00  1.012e+00  -1.104
## high.educPost Graduate Degree      2.399e-01  9.851e-01   0.244
## high.educSome College      6.678e-01  9.392e-01   0.711
## hormone_scr_ert_mean:accumbens_rvsn_ant_z -2.688e-03  1.286e-02  -0.209
##
##             Pr(>|t|)
## (Intercept)      0.30101
## PDS_score         0.00485 **
## hormone_sal_end_min_since_midnight
## hormone_scr_ert_mean      0.41330
## accumbens_rvsn_ant_z      0.99206
## race.ethnicity.5levelBlack      0.97780
## race.ethnicity.5levelMixed      0.27047
## race.ethnicity.5levelOther      0.68582
## race.ethnicity.5levelWhite      0.17787
## demo_race_hispanic1      0.99585
## interview_age      0.77216
## MRI_minus_hormone_date_time      0.23811
## bmi      0.95851
## household.income[>=200K]      0.00320 **
## household.income[100K-200K]    0.00753 **

```

```

## household.income[12K-16K]                0.66760
## household.income[16K-25K]                0.75905
## household.income[25K-35K]                0.44720
## household.income[35K-50K]                0.52567
## household.income[50K-75K]                0.03340 *
## household.income[5K-12K]                 0.79110
## household.income[75K-100K]               0.00656 **
## high.educBachelor                        0.26012
## high.educHS Diploma/GED                  0.26968
## high.educPost Graduate Degree            0.80760
## high.educSome College                    0.47714
## hormone_scr_ert_mean:accumbens_rvsn_ant_z 0.83447
## ---
## Signif. codes:  0 '***' 0.001 '**' 0.01 '*' 0.05 '.' 0.1 ' ' 1
##
##
## R-sq.(adj) =  0.0356
## lmer.REML = 10406  Scale est. = 13.535    n = 1674

##
##                stdcoef      stdse
## X(Intercept)    0.000000000 0.0000000
## XPDS_score      0.0723404749 0.02564502
## Xhormone_sal_end_min_since_midnight      0.0249720782 0.02614040
## Xhormone_scr_ert_mean                    0.0204931663 0.02504337
## Xaccumbens_rvsn_ant_z                    -0.0005567837 0.05596713
## Xrace.ethnicity.5levelBlack              0.0017185566 0.06173835
## Xrace.ethnicity.5levelMixed              0.0704817116 0.06393760
## Xrace.ethnicity.5levelOther              0.0192912758 0.04767845
## Xrace.ethnicity.5levelWhite              0.1139795398 0.08456004
## Xdemo_race_hispanic1                    0.0001548751 0.02977191
## Xinterview_age                            0.0070338937 0.02428848
## XMRI_minus_hormone_date_time            0.0294339933 0.02494075
## Xbmi                                        0.0013173751 0.02532139
## Xhousehold.income[>=200K]               -0.1874760078 0.06349745
## Xhousehold.income[100K-200K]            -0.2221728964 0.08302499
## Xhousehold.income[12K-16K]              -0.0137555632 0.03202509
## Xhousehold.income[16K-25K]              0.0118783970 0.03872016
## Xhousehold.income[25K-35K]              -0.0313507347 0.04123599
## Xhousehold.income[35K-50K]              -0.0299036175 0.04710972
## Xhousehold.income[50K-75K]              -0.1293417455 0.06075079
## Xhousehold.income[5K-12K]               0.0091898337 0.03468816
## Xhousehold.income[75K-100K]             -0.1739574460 0.06391699
## Xhigh.educBachelor                       0.0891384651 0.07912945
## Xhigh.educHS Diploma/GED                -0.0475163265 0.04303340
## Xhigh.educPost Graduate Degree           0.0211888078 0.08699726
## Xhigh.educSome College                   0.0513335740 0.07219249
## Xhormone_scr_ert_mean:accumbens_rvsn_ant_z -0.0116339789 0.05566242

```



## 4.15 Model: CBCL internalizing factor ~ Testosterone x Caudate activity (anticipation stage) + PDS

### Female participants

```
## Warning: Some predictor variables are on very different scales: consider
## rescaling

##
## Family: gaussian
## Link function: identity
##
## Formula:
## cbcl_scr_syn_internal_r ~ PDS_score + hormone_sal_end_min_since_midnight +
##   hormone_scr_ert_mean * caudate_rvsn_ant_z + race.ethnicity.5level +
##   demo_race_hispanic + interview_age + MRI_minus_hormone_date_time +
##   bmi + household.income + high.educ
##
## Parametric coefficients:
##               Estimate Std. Error t value Pr(>|t|)
## (Intercept)   -4.883e-01  2.616e+00  -0.187  0.85196
## PDS_score      8.134e-01  2.054e-01   3.959  7.85e-05
## hormone_sal_end_min_since_midnight -3.392e-05  8.014e-04  -0.042  0.96624
## hormone_scr_ert_mean -3.980e-03  8.231e-03  -0.484  0.62879
## caudate_rvsn_ant_z  4.947e-01  3.215e-01   1.538  0.12412
## race.ethnicity.5levelBlack -7.525e-01  9.076e-01  -0.829  0.40720
## race.ethnicity.5levelMixed  8.977e-01  8.715e-01   1.030  0.30316
## race.ethnicity.5levelOther -5.283e-01  1.057e+00  -0.500  0.61721
## race.ethnicity.5levelWhite  1.477e+00  8.064e-01   1.832  0.06717
## demo_race_hispanic1 -1.875e-01  4.050e-01  -0.463  0.64350
## interview_age  2.639e-02  1.824e-02   1.447  0.14804
## MRI_minus_hormone_date_time  4.122e-05  1.646e-05   2.505  0.01234
## bmi  5.585e-02  3.659e-02   1.526  0.12715
## household.income[>=200K] -2.629e+00  9.922e-01  -2.650  0.00813
## household.income[100K-200K] -1.747e+00  9.209e-01  -1.897  0.05799
## household.income[12K-16K] -4.319e-01  1.160e+00  -0.372  0.70965
## household.income[16K-25K] -1.656e+00  1.059e+00  -1.563  0.11829
## household.income[25K-35K] -1.877e-01  9.615e-01  -0.195  0.84522
## household.income[35K-50K] -1.270e+00  9.391e-01  -1.352  0.17659
## household.income[50K-75K] -1.558e+00  9.264e-01  -1.682  0.09275
## household.income[5K-12K] -7.828e-01  1.124e+00  -0.697  0.48609
## household.income[75K-100K] -1.543e+00  9.321e-01  -1.655  0.09809
## high.educBachelor  1.966e-01  8.796e-01   0.223  0.82320
## high.educHS Diploma/GED -7.450e-02  8.950e-01  -0.083  0.93367
## high.educPost Graduate Degree  6.087e-01  8.941e-01   0.681  0.49608
## high.educSome College  7.508e-01  8.296e-01   0.905  0.36556
## hormone_scr_ert_mean:caudate_rvsn_ant_z -1.218e-02  8.165e-03  -1.491  0.13611
##
## (Intercept)
## PDS_score ***
## hormone_sal_end_min_since_midnight
## hormone_scr_ert_mean
## caudate_rvsn_ant_z
## race.ethnicity.5levelBlack
```

```

## race.ethnicity.5levelMixed
## race.ethnicity.5levelOther
## race.ethnicity.5levelWhite .
## demo_race_hispanic1
## interview_age
## MRI_minus_hormone_date_time *
## bmi
## household.income[>=200K] **
## household.income[100K-200K] .
## household.income[12K-16K]
## household.income[16K-25K]
## household.income[25K-35K]
## household.income[35K-50K]
## household.income[50K-75K] .
## household.income[5K-12K]
## household.income[75K-100K] .
## high.educBachelor
## high.educHS Diploma/GED
## high.educPost Graduate Degree
## high.educSome College
## hormone_scr_ert_mean:caudate_rvsn_ant_z
## ---
## Signif. codes:  0 '***' 0.001 '**' 0.01 '*' 0.05 '.' 0.1 ' ' 1
##
##
## R-sq.(adj) =  0.0304
## lmer.REML = 10279  Scale est. = 16.006    n = 1672

##                stdcoef      stdse
## X(Intercept)      0.00000000 0.00000000
## XPDS_score        0.109124827 0.02756336
## Xhormone_sal_end_min_since_midnight -0.001107113 0.02615621
## Xhormone_scr_ert_mean -0.012524946 0.02590361
## Xcaudate_rvsn_ant_z  0.082137502 0.05338872
## Xrace.ethnicity.5levelBlack -0.047130510 0.05684949
## Xrace.ethnicity.5levelMixed  0.055659728 0.05403863
## Xrace.ethnicity.5levelOther -0.019971414 0.03995091
## Xrace.ethnicity.5levelWhite  0.129552136 0.07072667
## Xdemo_race_hispanic1 -0.013623992 0.02943230
## Xinterview_age      0.037128261 0.02565552
## XMRI_minus_hormone_date_time  0.062860944 0.02509336
## Xbmi                0.039553515 0.02591629
## Xhousehold.income[>=200K] -0.156788730 0.05917034
## Xhousehold.income[100K-200K] -0.154173834 0.08126811
## Xhousehold.income[12K-16K] -0.012374755 0.03323112
## Xhousehold.income[16K-25K] -0.057737369 0.03694511
## Xhousehold.income[25K-35K] -0.008688559 0.04450012
## Xhousehold.income[35K-50K] -0.067192607 0.04970225
## Xhousehold.income[50K-75K] -0.098561222 0.05859534
## Xhousehold.income[5K-12K] -0.023230082 0.03334319
## Xhousehold.income[75K-100K] -0.105794845 0.06391911
## Xhigh.educBachelor    0.016389741 0.07334485
## Xhigh.educHS Diploma/GED -0.003660007 0.04396884
## Xhigh.educPost Graduate Degree  0.055583918 0.08164207

```

```
## Xhigh.educSome College          0.059793407 0.06606495
## Xhormone_scr_ert_mean:caudate_rvsn_ant_z -0.079458951 0.05328639
```

### Male participants

```
## Warning: Some predictor variables are on very different scales: consider
## rescaling
```

```
##
## Family: gaussian
## Link function: identity
##
## Formula:
## cbcl_scr_syn_internal_r ~ PDS_score + hormone_sal_end_min_since_midnight +
##   hormone_scr_ert_mean * caudate_rvsn_ant_z + race.ethnicity.5level +
##   demo_race_hispanic + interview_age + MRI_minus_hormone_date_time +
##   bmi + household.income + high.educ
##
## Parametric coefficients:
##
##           Estimate Std. Error t value Pr(>|t|)
## (Intercept)      2.530e+00  2.697e+00   0.938  0.34835
## PDS_score         7.807e-01  2.836e-01   2.752  0.00598
## hormone_sal_end_min_since_midnight  7.234e-04  8.125e-04   0.890  0.37338
## hormone_scr_ert_mean  6.546e-03  9.421e-03   0.695  0.48728
## caudate_rvsn_ant_z  2.726e-01  3.353e-01   0.813  0.41639
## race.ethnicity.5levelBlack  6.818e-02  1.132e+00   0.060  0.95199
## race.ethnicity.5levelMixed  1.301e+00  1.103e+00   1.180  0.23825
## race.ethnicity.5levelOther  4.384e-01  1.239e+00   0.354  0.72360
## race.ethnicity.5levelWhite  1.441e+00  1.041e+00   1.383  0.16676
## demo_race_hispanic1  8.548e-02  4.277e-01   0.200  0.84161
## interview_age     5.520e-03  1.768e-02   0.312  0.75489
## MRI_minus_hormone_date_time  1.991e-05  1.827e-05   1.089  0.27618
## bmi               6.543e-03  3.816e-02   0.171  0.86389
## household.income[>=200K] -2.904e+00  1.022e+00 -2.843  0.00453
## household.income[100K-200K] -2.398e+00  9.648e-01 -2.485  0.01304
## household.income[12K-16K]  4.000e-02  1.262e+00   0.032  0.97471
## household.income[16K-25K]  6.496e-01  1.062e+00   0.612  0.54090
## household.income[25K-35K] -5.434e-01  1.048e+00 -0.519  0.60409
## household.income[35K-50K] -5.025e-01  1.016e+00 -0.495  0.62087
## household.income[50K-75K] -1.779e+00  9.617e-01 -1.850  0.06450
## household.income[5K-12K]  6.561e-01  1.115e+00   0.588  0.55637
## household.income[75K-100K] -2.425e+00  9.814e-01 -2.471  0.01359
## high.educBachelor  1.101e+00  9.674e-01   1.138  0.25543
## high.educHS Diploma/GED -1.185e+00  9.967e-01 -1.189  0.23476
## high.educPost Graduate Degree  2.577e-01  9.711e-01   0.265  0.79080
## high.educSome College  6.339e-01  9.251e-01   0.685  0.49335
## hormone_scr_ert_mean:caudate_rvsn_ant_z -5.733e-03  9.681e-03 -0.592  0.55379
##
## (Intercept)
## PDS_score          **
## hormone_sal_end_min_since_midnight
## hormone_scr_ert_mean
## caudate_rvsn_ant_z
```

```

## race.ethnicity.5levelBlack
## race.ethnicity.5levelMixed
## race.ethnicity.5levelOther
## race.ethnicity.5levelWhite
## demo_race_hispanic1
## interview_age
## MRI_minus_hormone_date_time
## bmi
## household.income[>=200K]          **
## household.income[100K-200K]      *
## household.income[12K-16K]
## household.income[16K-25K]
## household.income[25K-35K]
## household.income[35K-50K]
## household.income[50K-75K]        .
## household.income[5K-12K]
## household.income[75K-100K]       *
## high.educBachelor
## high.educHS Diploma/GED
## high.educPost Graduate Degree
## high.educSome College
## hormone_scr_ert_mean:caudate_rvsn_ant_z
## ---
## Signif. codes:  0 '***' 0.001 '**' 0.01 '*' 0.05 '.' 0.1 ' ' 1
##
##
## R-sq.(adj) =  0.0366
## lmer.REML = 10442  Scale est. = 13.537    n = 1679

##
##                stdcoef      stdse
## X(Intercept)    0.000000000 0.00000000
## XPDS_score      0.0704299644 0.02558857
## Xhormone_sal_end_min_since_midnight 0.0232562277 0.02611879
## Xhormone_scr_ert_mean 0.0173835179 0.02501940
## Xcaudate_rvsn_ant_z 0.0444867628 0.05472613
## Xrace.ethnicity.5levelBlack 0.0037404396 0.06211397
## Xrace.ethnicity.5levelMixed 0.0758623810 0.06430135
## Xrace.ethnicity.5levelOther 0.0169095756 0.04780580
## Xrace.ethnicity.5levelWhite 0.1174457128 0.08490185
## Xdemo_race_hispanic1 0.0059619618 0.02982979
## Xinterview_age 0.0075844415 0.02428937
## XMRI_minus_hormone_date_time 0.0271249056 0.02490126
## Xbmi 0.0043397287 0.02531205
## Xhousehold.income[>=200K] -0.1777161616 0.06251968
## Xhousehold.income[100K-200K] -0.2040275017 0.08209479
## Xhousehold.income[12K-16K] 0.0009994828 0.03152755
## Xhousehold.income[16K-25K] 0.0233721478 0.03821576
## Xhousehold.income[25K-35K] -0.0210816297 0.04064873
## Xhousehold.income[35K-50K] -0.0228474132 0.04618342
## Xhousehold.income[50K-75K] -0.1114931644 0.06026783
## Xhousehold.income[5K-12K] 0.0200736746 0.03411816
## Xhousehold.income[75K-100K] -0.1566335882 0.06340061
## Xhigh.educBachelor 0.0885912758 0.07787159
## Xhigh.educHS Diploma/GED -0.0499924125 0.04205908

```

```
## Xhigh.educPost Graduate Degree          0.0227275673 0.08566148
## Xhigh.educSome College                  0.0485194919 0.07081591
## Xhormone_scr_ert_mean:caudate_rvsn_ant_z -0.0322742551 0.05449846
```

#### 4.16 Model: CBCL internalizing factor ~ Testosterone x Putamen activity (anticipation stage) + PDS

##### Female participants

```
## Warning: Some predictor variables are on very different scales: consider
## rescaling

##
## Family: gaussian
## Link function: identity
##
## Formula:
## cbcl_scr_syn_internal_r ~ PDS_score + hormone_sal_end_min_since_midnight +
##   hormone_scr_ert_mean * putamen_rvsn_ant_z + race.ethnicity.5level +
##   demo_race_hispanic + interview_age + MRI_minus_hormone_date_time +
##   bmi + household.income + high.educ
##
## Parametric coefficients:
##               Estimate Std. Error t value Pr(>|t|)
## (Intercept)   -7.804e-01 2.617e+00  -0.298  0.7656
## PDS_score      8.319e-01 2.058e-01  4.042 5.54e-05
## hormone_sal_end_min_since_midnight 8.783e-05 7.995e-04  0.110  0.9125
## hormone_scr_ert_mean -3.805e-03 8.236e-03  -0.462  0.6441
## putamen_rvsn_ant_z 4.369e-01 3.285e-01  1.330  0.1836
## race.ethnicity.5levelBlack -7.620e-01 9.070e-01  -0.840  0.4010
## race.ethnicity.5levelMixed 9.132e-01 8.718e-01  1.048  0.2950
## race.ethnicity.5levelOther -5.566e-01 1.055e+00  -0.527  0.5980
## race.ethnicity.5levelWhite 1.491e+00 8.063e-01  1.849  0.0647
## demo_race_hispanic1 -1.718e-01 4.049e-01  -0.424  0.6714
## interview_age 2.640e-02 1.824e-02  1.448  0.1479
## MRI_minus_hormone_date_time 4.011e-05 1.643e-05  2.442  0.0147
## bmi 5.184e-02 3.681e-02  1.408  0.1592
## household.income[>=200K] -2.472e+00 9.995e-01  -2.473  0.0135
## household.income[100K-200K] -1.563e+00 9.298e-01  -1.681  0.0929
## household.income[12K-16K] -2.943e-01 1.162e+00  -0.253  0.8001
## household.income[16K-25K] -1.397e+00 1.070e+00  -1.306  0.1918
## household.income[25K-35K] 6.128e-03 9.716e-01  0.006  0.9950
## household.income[35K-50K] -1.034e+00 9.496e-01  -1.088  0.2766
## household.income[50K-75K] -1.363e+00 9.351e-01  -1.458  0.1452
## household.income[5K-12K] -5.567e-01 1.132e+00  -0.492  0.6228
## household.income[75K-100K] -1.334e+00 9.404e-01  -1.419  0.1561
## high.educBachelor 2.608e-01 8.755e-01  0.298  0.7658
## high.educHS Diploma/GED -7.912e-02 8.898e-01  -0.089  0.9292
## high.educPost Graduate Degree 6.494e-01 8.901e-01  0.730  0.4657
## high.educSome College 7.941e-01 8.245e-01  0.963  0.3356
## hormone_scr_ert_mean:putamen_rvsn_ant_z -9.214e-03 8.488e-03  -1.085  0.2779
##
## (Intercept)
```

```

## PDS_score ***
## hormone_sal_end_min_since_midnight
## hormone_scr_ert_mean
## putamen_rvsn_ant_z
## race.ethnicity.5levelBlack
## race.ethnicity.5levelMixed
## race.ethnicity.5levelOther
## race.ethnicity.5levelWhite .
## demo_race_hispanic1
## interview_age
## MRI_minus_hormone_date_time *
## bmi
## household.income[>=200K] *
## household.income[100K-200K] .
## household.income[12K-16K]
## household.income[16K-25K]
## household.income[25K-35K]
## household.income[35K-50K]
## household.income[50K-75K]
## household.income[5K-12K]
## household.income[75K-100K]
## high.educBachelor
## high.educHS Diploma/GED
## high.educPost Graduate Degree
## high.educSome College
## hormone_scr_ert_mean:putamen_rvsn_ant_z
## ---
## Signif. codes:  0 '***' 0.001 '**' 0.01 '*' 0.05 '.' 0.1 ' ' 1
##
##
## R-sq.(adj) =  0.0305
## lmer.REML = 10280  Scale est. = 15.953    n = 1672

##                stdcoef      stdse
## X(Intercept)    0.000000000 0.0000000
## XPDS_score      0.1116892733 0.02763220
## Xhormone_sal_end_min_since_midnight 0.0028744280 0.02616436
## Xhormone_scr_ert_mean -0.0119735534 0.02591645
## Xputamen_rvsn_ant_z 0.0706986270 0.05314624
## Xrace.ethnicity.5levelBlack -0.0476385230 0.05670529
## Xrace.ethnicity.5levelMixed 0.0565180228 0.05395366
## Xrace.ethnicity.5levelOther -0.0211859141 0.04016680
## Xrace.ethnicity.5levelWhite 0.1307188423 0.07070305
## Xdemo_race_hispanic1 -0.0125054555 0.02946845
## Xinterview_age 0.0371558885 0.02566488
## XMRI_minus_hormone_date_time 0.0612620991 0.02508928
## Xbmi 0.0365728336 0.02596995
## Xhousehold.income[>=200K] -0.1477967340 0.05975650
## Xhousehold.income[100K-200K] -0.1380968182 0.08214396
## Xhousehold.income[12K-16K] -0.0085354385 0.03370205
## Xhousehold.income[16K-25K] -0.0483468536 0.03702476
## Xhousehold.income[25K-35K] 0.0002824595 0.04478637
## Xhousehold.income[35K-50K] -0.0542033312 0.04979990
## Xhousehold.income[50K-75K] -0.0863936015 0.05927286

```

```

## Xhousehold.income[5K-12K] -0.0165255334 0.03359327
## Xhousehold.income[75K-100K] -0.0916478869 0.06459562
## Xhigh.educBachelor 0.0217480834 0.07301279
## Xhigh.educHS Diploma/GED -0.0038878874 0.04372003
## Xhigh.educPost Graduate Degree 0.0592963372 0.08127352
## Xhigh.educSome College 0.0632509786 0.06567096
## Xhormone_scr_ert_mean:putamen_rvsn_ant_z -0.0576043126 0.05306916

```

## Male participants

```

## Warning: Some predictor variables are on very different scales: consider
## rescaling

```

```

##
## Family: gaussian
## Link function: identity
##
## Formula:
## cbcl_scr_syn_internal_r ~ PDS_score + hormone_sal_end_min_since_midnight +
##   hormone_scr_ert_mean * putamen_rvsn_ant_z + race.ethnicity.5level +
##   demo_race_hispanic + interview_age + MRI_minus_hormone_date_time +
##   bmi + household.income + high.educ
##
## Parametric coefficients:
##
##           Estimate Std. Error t value Pr(>|t|)
## (Intercept) 2.722e+00 2.702e+00 1.007 0.31399
## PDS_score 8.062e-01 2.852e-01 2.827 0.00475
## hormone_sal_end_min_since_midnight 7.355e-04 8.151e-04 0.902 0.36705
## hormone_scr_ert_mean 5.866e-03 9.413e-03 0.623 0.53325
## putamen_rvsn_ant_z -8.842e-02 3.461e-01 -0.255 0.79839
## race.ethnicity.5levelBlack 1.287e-01 1.135e+00 0.113 0.90970
## race.ethnicity.5levelMixed 1.267e+00 1.106e+00 1.146 0.25190
## race.ethnicity.5levelOther 4.548e-01 1.242e+00 0.366 0.71432
## race.ethnicity.5levelWhite 1.409e+00 1.044e+00 1.350 0.17733
## demo_race_hispanic1 6.872e-02 4.266e-01 0.161 0.87204
## interview_age 3.325e-03 1.773e-02 0.188 0.85122
## MRI_minus_hormone_date_time 2.232e-05 1.835e-05 1.216 0.22412
## bmi 5.396e-03 3.830e-02 0.141 0.88797
## household.income[>=200K] -2.925e+00 1.021e+00 -2.863 0.00424
## household.income[100K-200K] -2.474e+00 9.644e-01 -2.566 0.01039
## household.income[12K-16K] -2.243e-01 1.253e+00 -0.179 0.85800
## household.income[16K-25K] 5.445e-01 1.060e+00 0.514 0.60751
## household.income[25K-35K] -6.367e-01 1.046e+00 -0.609 0.54285
## household.income[35K-50K] -5.702e-01 1.017e+00 -0.561 0.57495
## household.income[50K-75K] -1.835e+00 9.615e-01 -1.908 0.05654
## household.income[5K-12K] 3.469e-01 1.107e+00 0.313 0.75404
## household.income[75K-100K] -2.464e+00 9.822e-01 -2.509 0.01220
## high.educBachelor 1.259e+00 9.611e-01 1.310 0.19031
## high.educHS Diploma/GED -1.088e+00 9.906e-01 -1.099 0.27208
## high.educPost Graduate Degree 4.203e-01 9.650e-01 0.436 0.66322
## high.educSome College 7.565e-01 9.173e-01 0.825 0.40962
## hormone_scr_ert_mean:putamen_rvsn_ant_z 3.176e-04 1.009e-02 0.031 0.97489
##

```

```

## (Intercept)
## PDS_score **
## hormone_sal_end_min_since_midnight
## hormone_scr_ert_mean
## putamen_rvsn_ant_z
## race.ethnicity.5levelBlack
## race.ethnicity.5levelMixed
## race.ethnicity.5levelOther
## race.ethnicity.5levelWhite
## demo_race_hispanic1
## interview_age
## MRI_minus_hormone_date_time
## bmi
## household.income[>=200K] **
## household.income[100K-200K] *
## household.income[12K-16K]
## household.income[16K-25K]
## household.income[25K-35K]
## household.income[35K-50K]
## household.income[50K-75K] .
## household.income[5K-12K]
## household.income[75K-100K] *
## high.educBachelor
## high.educHS Diploma/GED
## high.educPost Graduate Degree
## high.educSome College
## hormone_scr_ert_mean:putamen_rvsn_ant_z
## ---
## Signif. codes:  0 '***' 0.001 '**' 0.01 '*' 0.05 '.' 0.1 ' ' 1
##
##
## R-sq.(adj) =  0.0345
## lmer.REML = 10455  Scale est. = 13.714    n = 1680

##                stdcoef    stdse
## X(Intercept)    0.00000000 0.00000000
## XPDS_score      0.072478644 0.02563621
## Xhormone_sal_end_min_since_midnight 0.023591496 0.02614688
## Xhormone_scr_ert_mean 0.015596864 0.02502768
## Xputamen_rvsn_ant_z -0.014357397 0.05619919
## Xrace.ethnicity.5levelBlack 0.007057386 0.06221452
## Xrace.ethnicity.5levelMixed 0.073845438 0.06442873
## Xrace.ethnicity.5levelOther 0.017528207 0.04787541
## Xrace.ethnicity.5levelWhite 0.114815711 0.08507498
## Xdemo_race_hispanic1 0.004802021 0.02980957
## Xinterview_age 0.004562845 0.02432359
## XMRI_minus_hormone_date_time 0.030296006 0.02491218
## Xbmi 0.003569931 0.02533859
## Xhousehold.income[>=200K] -0.178870890 0.06246895
## Xhousehold.income[100K-200K] -0.210318131 0.08197442
## Xhousehold.income[12K-16K] -0.005682002 0.03175282
## Xhousehold.income[16K-25K] 0.019709279 0.03836486
## Xhousehold.income[25K-35K] -0.024824695 0.04078759
## Xhousehold.income[35K-50K] -0.025903880 0.04618425

```



```

## Xhousehold.income[50K-75K] -0.114909667 0.06021907
## Xhousehold.income[5K-12K] 0.010809443 0.03449472
## Xhousehold.income[75K-100K] -0.158313587 0.06309977
## Xhigh.educBachelor 0.101164659 0.07721316
## Xhigh.educHS Diploma/GED -0.046112935 0.04197193
## Xhigh.educPost Graduate Degree 0.037027516 0.08501323
## Xhigh.educSome College 0.058071036 0.07040864
## Xhormone_scr_ert_mean:putamen_rvsn_ant_z 0.001759602 0.05590481

```

#### 4.17 Model: CBCL internalizing factor ~ Testosterone x Accumbens activity (feedback stage) + PDS

##### Female participants

```

## Warning: Some predictor variables are on very different scales: consider
## rescaling

##
## Family: gaussian
## Link function: identity
##
## Formula:
## cbcl_scr_syn_internal_r ~ PDS_score + hormone_sal_end_min_since_midnight +
##   hormone_scr_ert_mean * accumbens_posvsneg_feedback_z + race.ethnicity.5level +
##   demo_race_hispanic + interview_age + MRI_minus_hormone_date_time +
##   bmi + household.income + high.educ
##
## Parametric coefficients:
##
##               Estimate Std. Error
## (Intercept) -7.949e-01 2.625e+00
## PDS_score    8.086e-01 2.071e-01
## hormone_sal_end_min_since_midnight 9.388e-05 8.022e-04
## hormone_scr_ert_mean -3.682e-03 8.265e-03
## accumbens_posvsneg_feedback_z 2.404e-01 4.472e-01
## race.ethnicity.5levelBlack -6.950e-01 9.106e-01
## race.ethnicity.5levelMixed 9.445e-01 8.732e-01
## race.ethnicity.5levelOther -4.542e-01 1.054e+00
## race.ethnicity.5levelWhite 1.482e+00 8.069e-01
## demo_race_hispanic1 -2.111e-01 4.092e-01
## interview_age 2.648e-02 1.830e-02
## MRI_minus_hormone_date_time 3.967e-05 1.643e-05
## bmi 5.208e-02 3.679e-02
## household.income[>=200K] -2.401e+00 1.001e+00
## household.income[100K-200K] -1.445e+00 9.304e-01
## household.income[12K-16K] -2.560e-01 1.162e+00
## household.income[16K-25K] -1.414e+00 1.069e+00
## household.income[25K-35K] 7.553e-02 9.706e-01
## household.income[35K-50K] -9.574e-01 9.511e-01
## household.income[50K-75K] -1.244e+00 9.377e-01
## household.income[5K-12K] -6.201e-01 1.139e+00
## household.income[75K-100K] -1.218e+00 9.430e-01
## high.educBachelor 1.842e-01 8.873e-01
## high.educHS Diploma/GED -9.178e-02 8.989e-01

```

```

## high.educPost Graduate Degree          5.942e-01  9.024e-01
## high.educSome College                  7.220e-01  8.347e-01
## hormone_scr_ert_mean:accumbens_posvsneg_feedback_z -4.005e-04  1.121e-02
##                                     t value Pr(>|t|)
## (Intercept)                            -0.303   0.7621
## PDS_score                               3.905   9.8e-05 ***
## hormone_sal_end_min_since_midnight      0.117   0.9068
## hormone_scr_ert_mean                   -0.446   0.6560
## accumbens_posvsneg_feedback_z          0.538   0.5909
## race.ethnicity.5levelBlack              -0.763   0.4454
## race.ethnicity.5levelMixed              1.082   0.2796
## race.ethnicity.5levelOther             -0.431   0.6665
## race.ethnicity.5levelWhite              1.837   0.0664 .
## demo_race_hispanic1                   -0.516   0.6060
## interview_age                           1.447   0.1480
## MRI_minus_hormone_date_time            2.415   0.0159 *
## bmi                                     1.415   0.1571
## household.income[>=200K]                -2.400   0.0165 *
## household.income[100K-200K]            -1.553   0.1207
## household.income[12K-16K]              -0.220   0.8257
## household.income[16K-25K]              -1.323   0.1860
## household.income[25K-35K]               0.078   0.9380
## household.income[35K-50K]              -1.007   0.3143
## household.income[50K-75K]              -1.326   0.1849
## household.income[5K-12K]                -0.544   0.5862
## household.income[75K-100K]             -1.292   0.1965
## high.educBachelor                       0.208   0.8356
## high.educHS Diploma/GED                -0.102   0.9187
## high.educPost Graduate Degree           0.659   0.5103
## high.educSome College                   0.865   0.3872
## hormone_scr_ert_mean:accumbens_posvsneg_feedback_z -0.036   0.9715
## ---
## Signif. codes:  0 '***' 0.001 '**' 0.01 '*' 0.05 '.' 0.1 ' ' 1
##
##
## R-sq.(adj) =  0.0284
## lmer.REML = 10256  Scale est. = 15.925    n = 1668

##                                     stdcoef      stdse
## X(Intercept)                        0.000000000  0.000000000
## XPDS_score                           0.108124221  0.02768792
## Xhormone_sal_end_min_since_midnight  0.003071502  0.02624395
## Xhormone_scr_ert_mean                 -0.011591195  0.02601708
## Xaccumbens_posvsneg_feedback_z       0.030805545  0.05730303
## Xrace.ethnicity.5levelBlack           -0.043253988  0.05666949
## Xrace.ethnicity.5levelMixed           0.058292677  0.05389254
## Xrace.ethnicity.5levelOther           -0.017430997  0.04044054
## Xrace.ethnicity.5levelWhite           0.129847516  0.07069123
## Xdemo_race_hispanic1                 -0.015345338  0.02974920
## Xinterview_age                        0.037247389  0.02573694
## XMRI_minus_hormone_date_time          0.060749051  0.02516001
## Xbmi                                  0.036836014  0.02602454
## Xhousehold.income[>=200K]            -0.143765115  0.05990502
## Xhousehold.income[100K-200K]         -0.127702405  0.08223726

```

```

## Xhousehold.income[12K-16K] -0.007435584 0.03376514
## Xhousehold.income[16K-25K] -0.049400563 0.03733671
## Xhousehold.income[25K-35K] 0.003501769 0.04500085
## Xhousehold.income[35K-50K] -0.050281075 0.04994949
## Xhousehold.income[50K-75K] -0.078334681 0.05905846
## Xhousehold.income[5K-12K] -0.018225624 0.03347515
## Xhousehold.income[75K-100K] -0.083804874 0.06486592
## Xhigh.educBachelor 0.015400315 0.07418714
## Xhigh.educHS Diploma/GED -0.004499576 0.04407105
## Xhigh.educPost Graduate Degree 0.054303132 0.08246194
## Xhigh.educSome College 0.057376268 0.06633482
## Xhormone_scr_ert_mean:accumbens_posvsneg_feedback_z -0.002037224 0.05704060

```

## Male participants

```

## Warning: Some predictor variables are on very different scales: consider
## rescaling

##
## Family: gaussian
## Link function: identity
##
## Formula:
## cbcl_scr_syn_internal_r ~ PDS_score + hormone_sal_end_min_since_midnight +
##   hormone_scr_ert_mean * accumbens_posvsneg_feedback_z + race.ethnicity.5level +
##   demo_race_hispanic + interview_age + MRI_minus_hormone_date_time +
##   bmi + household.income + high.educ
##
## Parametric coefficients:
##
##               Estimate Std. Error
## (Intercept)  3.184e+00  2.716e+00
## PDS_score    7.978e-01  2.821e-01
## hormone_sal_end_min_since_midnight  6.255e-04  8.134e-04
## hormone_scr_ert_mean  3.908e-03  9.425e-03
## accumbens_posvsneg_feedback_z -2.177e-01  4.183e-01
## race.ethnicity.5levelBlack -4.490e-02  1.150e+00
## race.ethnicity.5levelMixed  1.255e+00  1.120e+00
## race.ethnicity.5levelOther  3.590e-01  1.254e+00
## race.ethnicity.5levelWhite  1.420e+00  1.060e+00
## demo_race_hispanic1  7.689e-02  4.239e-01
## interview_age  1.170e-03  1.767e-02
## MRI_minus_hormone_date_time  2.027e-05  1.876e-05
## bmi  2.701e-02  3.819e-02
## household.income[>=200K] -3.333e+00  1.043e+00
## household.income[100K-200K] -2.967e+00  9.863e-01
## household.income[12K-16K] -6.930e-01  1.258e+00
## household.income[16K-25K]  1.190e-01  1.081e+00
## household.income[25K-35K] -1.024e+00  1.068e+00
## household.income[35K-50K] -9.366e-01  1.036e+00
## household.income[50K-75K] -2.304e+00  9.844e-01
## household.income[5K-12K]  3.558e-02  1.141e+00
## household.income[75K-100K] -2.955e+00  1.005e+00
## high.educBachelor  1.282e+00  9.661e-01

```

```

## high.educHS Diploma/GED -1.075e+00 9.964e-01
## high.educPost Graduate Degree 4.644e-01 9.690e-01
## high.educSome College 8.078e-01 9.222e-01
## hormone_scr_ert_mean:accumbens_posvsneg_feedback_z -7.150e-04 1.240e-02
## t value Pr(>|t|)
## (Intercept) 1.172 0.24127
## PDS_score 2.828 0.00475 **
## hormone_sal_end_min_since_midnight 0.769 0.44206
## hormone_scr_ert_mean 0.415 0.67850
## accumbens_posvsneg_feedback_z -0.520 0.60282
## race.ethnicity.5levelBlack -0.039 0.96885
## race.ethnicity.5levelMixed 1.120 0.26267
## race.ethnicity.5levelOther 0.286 0.77474
## race.ethnicity.5levelWhite 1.340 0.18044
## demo_race_hispanic1 0.181 0.85611
## interview_age 0.066 0.94724
## MRI_minus_hormone_date_time 1.080 0.28013
## bmi 0.707 0.47952
## household.income[>=200K] -3.196 0.00142 **
## household.income[100K-200K] -3.008 0.00267 **
## household.income[12K-16K] -0.551 0.58191
## household.income[16K-25K] 0.110 0.91235
## household.income[25K-35K] -0.959 0.33777
## household.income[35K-50K] -0.904 0.36601
## household.income[50K-75K] -2.341 0.01936 *
## household.income[5K-12K] 0.031 0.97513
## household.income[75K-100K] -2.940 0.00333 **
## high.educBachelor 1.327 0.18459
## high.educHS Diploma/GED -1.079 0.28075
## high.educPost Graduate Degree 0.479 0.63177
## high.educSome College 0.876 0.38117
## hormone_scr_ert_mean:accumbens_posvsneg_feedback_z -0.058 0.95404
## ---
## Signif. codes: 0 '***' 0.001 '**' 0.01 '*' 0.05 '.' 0.1 ' ' 1
##
##
## R-sq.(adj) = 0.0372
## lmer.REML = 10436 Scale est. = 13.379 n = 1678

## stdcoef stdse
## X(Intercept) 0.000000000 0.000000000
## XPDS_score 0.072225268 0.02554224
## Xhormone_sal_end_min_since_midnight 0.020062230 0.02609202
## Xhormone_scr_ert_mean 0.010380629 0.02503868
## Xaccumbens_posvsneg_feedback_z -0.028720748 0.05518435
## Xrace.ethnicity.5levelBlack -0.002449120 0.06270211
## Xrace.ethnicity.5levelMixed 0.072994861 0.06514578
## Xrace.ethnicity.5levelOther 0.013917023 0.04862301
## Xrace.ethnicity.5levelWhite 0.115499936 0.08619632
## Xdemo_race_hispanic1 0.005385960 0.02969832
## Xinterview_age 0.001604375 0.02424158
## XMRI_minus_hormone_date_time 0.026852995 0.02485526
## Xbmi 0.017802167 0.02517135
## Xhousehold.income[>=200K] -0.203830778 0.06377801

```

```

## Xhousehold.income[100K-200K] -0.252350144 0.08389365
## Xhousehold.income[12K-16K] -0.017809719 0.03234002
## Xhousehold.income[16K-25K] 0.004306450 0.03911837
## Xhousehold.income[25K-35K] -0.039706958 0.04141033
## Xhousehold.income[35K-50K] -0.042895933 0.04743985
## Xhousehold.income[50K-75K] -0.144057837 0.06154357
## Xhousehold.income[5K-12K] 0.001077386 0.03455824
## Xhousehold.income[75K-100K] -0.190134030 0.06467996
## Xhigh.educBachelor 0.102732306 0.07739963
## Xhigh.educHS Diploma/GED -0.045555718 0.04222053
## Xhigh.educPost Graduate Degree 0.040946224 0.08542421
## Xhigh.educSome College 0.061954031 0.07072573
## Xhormone_scr_ert_mean:accumbens_posvsneg_feedback_z -0.003201184 0.05553586

```

#### 4.18 Model: CBCL internalizing factor ~ Testosterone x Caudate activity (Feed-back stage) + PDS

##### Female participants

```

## Warning: Some predictor variables are on very different scales: consider
## rescaling

##
## Family: gaussian
## Link function: identity
##
## Formula:
## cbcl_scr_syn_internal_r ~ PDS_score + hormone_sal_end_min_since_midnight +
##   hormone_scr_ert_mean * caudate_posvsneg_feedback_z + race.ethnicity.5level +
##   demo_race_hispanic + interview_age + MRI_minus_hormone_date_time +
##   bmi + household.income + high.educ
##
## Parametric coefficients:
##
##           Estimate Std. Error t value
## (Intercept) -5.841e-01 2.615e+00 -0.223
## PDS_score 8.067e-01 2.058e-01 3.919
## hormone_sal_end_min_since_midnight -2.040e-05 8.007e-04 -0.025
## hormone_scr_ert_mean -2.745e-03 8.232e-03 -0.333
## caudate_posvsneg_feedback_z -1.008e-01 3.496e-01 -0.288
## race.ethnicity.5levelBlack -8.449e-01 9.111e-01 -0.927
## race.ethnicity.5levelMixed 8.695e-01 8.737e-01 0.995
## race.ethnicity.5levelOther -5.496e-01 1.053e+00 -0.522
## race.ethnicity.5levelWhite 1.468e+00 8.079e-01 1.817
## demo_race_hispanic1 -1.677e-01 4.058e-01 -0.413
## interview_age 2.722e-02 1.828e-02 1.489
## MRI_minus_hormone_date_time 4.026e-05 1.642e-05 2.451
## bmi 5.339e-02 3.676e-02 1.452
## household.income[>=200K] -2.613e+00 9.933e-01 -2.630
## household.income[100K-200K] -1.747e+00 9.219e-01 -1.894
## household.income[12K-16K] -5.951e-01 1.154e+00 -0.516
## household.income[16K-25K] -1.659e+00 1.064e+00 -1.559
## household.income[25K-35K] -2.102e-01 9.625e-01 -0.218
## household.income[35K-50K] -1.273e+00 9.431e-01 -1.349

```

```

## household.income[50K-75K] -1.560e+00 9.273e-01 -1.682
## household.income[5K-12K] -7.702e-01 1.125e+00 -0.685
## household.income[75K-100K] -1.521e+00 9.322e-01 -1.632
## high.educBachelor 2.517e-01 8.831e-01 0.285
## high.educHS Diploma/GED 4.783e-02 8.967e-01 0.053
## high.educPost Graduate Degree 6.008e-01 8.976e-01 0.669
## high.educSome College 8.141e-01 8.315e-01 0.979
## hormone_scr_ert_mean:caudate_posvsneg_feedback_z 8.726e-04 9.032e-03 0.097
## Pr(>|t|)
## (Intercept) 0.82329
## PDS_score 9.24e-05 ***
## hormone_sal_end_min_since_midnight 0.97967
## hormone_scr_ert_mean 0.73884
## caudate_posvsneg_feedback_z 0.77321
## race.ethnicity.5levelBlack 0.35389
## race.ethnicity.5levelMixed 0.31978
## race.ethnicity.5levelOther 0.60183
## race.ethnicity.5levelWhite 0.06944 .
## demo_race_hispanic1 0.67949
## interview_age 0.13666
## MRI_minus_hormone_date_time 0.01435 *
## bmi 0.14658
## household.income[>=200K] 0.00862 **
## household.income[100K-200K] 0.05834 .
## household.income[12K-16K] 0.60613
## household.income[16K-25K] 0.11913
## household.income[25K-35K] 0.82713
## household.income[35K-50K] 0.17739
## household.income[50K-75K] 0.09267 .
## household.income[5K-12K] 0.49370
## household.income[75K-100K] 0.10288
## high.educBachelor 0.77564
## high.educHS Diploma/GED 0.95746
## high.educPost Graduate Degree 0.50334
## high.educSome College 0.32772
## hormone_scr_ert_mean:caudate_posvsneg_feedback_z 0.92305
## ---
## Signif. codes: 0 '***' 0.001 '**' 0.01 '*' 0.05 '.' 0.1 ' ' 1
##
##
## R-sq.(adj) = 0.029
## lmer.REML = 10268 Scale est. = 16.02 n = 1670

## stdcoef stdse
## X(Intercept) 0.0000000000 0.00000000
## XPDS_score 0.1082912132 0.02763003
## Xhormone_sal_end_min_since_midnight -0.0006679496 0.02621354
## Xhormone_scr_ert_mean -0.0086582437 0.02596560
## Xcaudate_posvsneg_feedback_z -0.0161919606 0.05617694
## Xrace.ethnicity.5levelBlack -0.0526499156 0.05677590
## Xrace.ethnicity.5levelMixed 0.0539640395 0.05422408
## Xrace.ethnicity.5levelOther -0.0210756270 0.04038483
## Xrace.ethnicity.5levelWhite 0.1287721020 0.07088108
## Xdemo_race_hispanic1 -0.0122285144 0.02959242

```

```

## Xinterview_age                0.0382850335 0.02571057
## XMRI_minus_hormone_date_time  0.0616199508 0.02514172
## Xbmi                          0.0378309070 0.02604700
## Xhousehold.income[>=200K]     -0.1555979077 0.05916089
## Xhousehold.income[100K-200K]  -0.1542441311 0.08141814
## Xhousehold.income[12K-16K]    -0.0172744242 0.03349709
## Xhousehold.income[16K-25K]    -0.0574574818 0.03684921
## Xhousehold.income[25K-35K]    -0.0097398433 0.04459274
## Xhousehold.income[35K-50K]    -0.0667890523 0.04949474
## Xhousehold.income[50K-75K]    -0.0985869774 0.05859738
## Xhousehold.income[5K-12K]     -0.0228804490 0.03342235
## Xhousehold.income[75K-100K]   -0.1048883246 0.06427212
## Xhigh.educBachelor            0.0209760818 0.07358843
## Xhigh.educHS Diploma/GED     0.0023520854 0.04409317
## Xhigh.educPost Graduate Degree 0.0548830546 0.08199029
## Xhigh.educSome College        0.0649413443 0.06633445
## Xhormone_scr_ert_mean:caudate_posvsneg_feedback_z 0.0054254362 0.05615769

```

### Male participants

```

## Warning: Some predictor variables are on very different scales: consider
## rescaling

##
## Family: gaussian
## Link function: identity
##
## Formula:
## cbcl_scr_syn_internal_r ~ PDS_score + hormone_sal_end_min_since_midnight +
##   hormone_scr_ert_mean * caudate_posvsneg_feedback_z + race.ethnicity.5level +
##   demo_race_hispanic + interview_age + MRI_minus_hormone_date_time +
##   bmi + household.income + high.educ
##
## Parametric coefficients:
##
##               Estimate Std. Error t value
## (Intercept)  2.974e+00  2.708e+00  1.098
## PDS_score    7.730e-01  2.815e-01  2.746
## hormone_sal_end_min_since_midnight 9.463e-04  8.106e-04  1.168
## hormone_scr_ert_mean 5.350e-03  9.411e-03  0.569
## caudate_posvsneg_feedback_z -1.387e-01  3.377e-01 -0.411
## race.ethnicity.5levelBlack 1.362e-02  1.140e+00  0.012
## race.ethnicity.5levelMixed 1.204e+00  1.109e+00  1.086
## race.ethnicity.5levelOther 3.628e-01  1.245e+00  0.291
## race.ethnicity.5levelWhite 1.325e+00  1.048e+00  1.265
## demo_race_hispanic1 6.919e-02  4.239e-01  0.163
## interview_age 1.577e-03  1.770e-02  0.089
## MRI_minus_hormone_date_time 2.008e-05  1.824e-05  1.101
## bmi          8.278e-03  3.804e-02  0.218
## household.income[>=200K] -2.967e+00  1.027e+00 -2.889
## household.income[100K-200K] -2.557e+00  9.706e-01 -2.634
## household.income[12K-16K] -3.674e-01  1.249e+00 -0.294
## household.income[16K-25K]  4.323e-01  1.069e+00  0.404
## household.income[25K-35K] -6.437e-01  1.053e+00 -0.611

```

```

## household.income[35K-50K] -5.709e-01 1.021e+00 -0.559
## household.income[50K-75K] -1.929e+00 9.682e-01 -1.993
## household.income[5K-12K] 6.161e-02 1.125e+00 0.055
## household.income[75K-100K] -2.565e+00 9.883e-01 -2.595
## high.educBachelor 1.232e+00 9.676e-01 1.273
## high.educHS Diploma/GED -1.075e+00 1.001e+00 -1.073
## high.educPost Graduate Degree 3.758e-01 9.705e-01 0.387
## high.educSome College 7.203e-01 9.228e-01 0.781
## hormone_scr_ert_mean:caudate_posvsneg_feedback_z 1.835e-03 9.812e-03 0.187
## Pr(>|t|)
## (Intercept) 0.27220
## PDS_score 0.00610 **
## hormone_sal_end_min_since_midnight 0.24317
## hormone_scr_ert_mean 0.56977
## caudate_posvsneg_feedback_z 0.68134
## race.ethnicity.5levelBlack 0.99047
## race.ethnicity.5levelMixed 0.27761
## race.ethnicity.5levelOther 0.77079
## race.ethnicity.5levelWhite 0.20596
## demo_race_hispanic1 0.87035
## interview_age 0.92901
## MRI_minus_hormone_date_time 0.27108
## bmi 0.82775
## household.income[>=200K] 0.00392 **
## household.income[100K-200K] 0.00851 **
## household.income[12K-16K] 0.76865
## household.income[16K-25K] 0.68606
## household.income[25K-35K] 0.54100
## household.income[35K-50K] 0.57613
## household.income[50K-75K] 0.04646 *
## household.income[5K-12K] 0.95633
## household.income[75K-100K] 0.00953 **
## high.educBachelor 0.20304
## high.educHS Diploma/GED 0.28334
## high.educPost Graduate Degree 0.69860
## high.educSome College 0.43516
## hormone_scr_ert_mean:caudate_posvsneg_feedback_z 0.85164
## ---
## Signif. codes: 0 '***' 0.001 '**' 0.01 '*' 0.05 '.' 0.1 ' ' 1
##
##
## R-sq.(adj) = 0.0339
## lmer.REML = 10439 Scale est. = 13.289 n = 1678

## stdcoef stdse
## X(Intercept) 0.0000000000 0.00000000
## XPDS_score 0.0702170181 0.02556938
## Xhormone_sal_end_min_since_midnight 0.0304057990 0.02604320
## Xhormone_scr_ert_mean 0.0142546163 0.02507400
## Xcaudate_posvsneg_feedback_z -0.0223386803 0.05439057
## Xrace.ethnicity.5levelBlack 0.0007425218 0.06212783
## Xrace.ethnicity.5levelMixed 0.0702751088 0.06470604
## Xrace.ethnicity.5levelOther 0.0140082283 0.04807428
## Xrace.ethnicity.5levelWhite 0.1079060774 0.08528526

```



```

## Xdemo_race_hispanic1                0.0048611318 0.02978015
## Xinterview_age                       0.0021677637 0.02432838
## XMRI_minus_hormone_date_time        0.0274166854 0.02490266
## Xbmi                                 0.0055059413 0.02530029
## Xhousehold.income[>=200K]          -0.1824957510 0.06317812
## Xhousehold.income[100K-200K]       -0.2176891375 0.08263178
## Xhousehold.income[12K-16K]         -0.0094579933 0.03214916
## Xhousehold.income[16K-25K]         0.0155711492 0.03851552
## Xhousehold.income[25K-35K]         -0.0249980349 0.04088435
## Xhousehold.income[35K-50K]         -0.0259859379 0.04647321
## Xhousehold.income[50K-75K]         -0.1210456297 0.06074430
## Xhousehold.income[5K-12K]          0.0018869622 0.03445426
## Xhousehold.income[75K-100K]        -0.1650743753 0.06360454
## Xhigh.educBachelor                  0.0989503040 0.07770276
## Xhigh.educHS Diploma/GED           -0.0454014070 0.04230484
## Xhigh.educPost Graduate Degree      0.0331759384 0.08566449
## Xhigh.educSome College              0.0554302229 0.07101075
## Xhormone_scr_ert_mean:caudate_posvsneg_feedback_z 0.0101522435 0.05427285

```

#### 4.19 Model: CBCL internalizing factor ~ Testosterone x Putamen activity (Feedback stage) + PDS

##### Female participants

```

## Warning: Some predictor variables are on very different scales: consider
## rescaling

##
## Family: gaussian
## Link function: identity
##
## Formula:
## cbcl_scr_syn_internal_r ~ PDS_score + hormone_sal_end_min_since_midnight +
##   hormone_scr_ert_mean * putamen_posvsneg_feedback_z + race.ethnicity.5level +
##   demo_race_hispanic + interview_age + MRI_minus_hormone_date_time +
##   bmi + household.income + high.educ
##
## Parametric coefficients:
##
##               Estimate Std. Error t value
## (Intercept)   -7.672e-01 2.616e+00  -0.293
## PDS_score      8.623e-01 2.064e-01  4.178
## hormone_sal_end_min_since_midnight 1.615e-05 8.024e-04  0.020
## hormone_scr_ert_mean -4.140e-03 8.260e-03 -0.501
## putamen_posvsneg_feedback_z 1.294e-01 3.542e-01  0.365
## race.ethnicity.5levelBlack -7.112e-01 9.080e-01 -0.783
## race.ethnicity.5levelMixed 9.082e-01 8.718e-01  1.042
## race.ethnicity.5levelOther -6.296e-01 1.054e+00 -0.597
## race.ethnicity.5levelWhite 1.503e+00 8.064e-01  1.863
## demo_race_hispanic1 -9.560e-02 4.067e-01 -0.235
## interview_age 2.668e-02 1.823e-02  1.463
## MRI_minus_hormone_date_time 4.047e-05 1.641e-05  2.466
## bmi 4.551e-02 3.676e-02  1.238
## household.income[>=200K] -2.409e+00 9.972e-01 -2.416

```

```

## household.income[100K-200K]          -1.508e+00  9.271e-01  -1.627
## household.income[12K-16K]           -2.799e-01  1.160e+00  -0.241
## household.income[16K-25K]           -1.362e+00  1.066e+00  -1.278
## household.income[25K-35K]            9.007e-02  9.684e-01   0.093
## household.income[35K-50K]           -9.729e-01  9.485e-01  -1.026
## household.income[50K-75K]           -1.269e+00  9.346e-01  -1.358
## household.income[5K-12K]            -4.818e-01  1.130e+00  -0.426
## household.income[75K-100K]          -1.301e+00  9.379e-01  -1.387
## high.educBachelor                    2.732e-01  8.825e-01   0.310
## high.educHS Diploma/GED             -8.317e-02  8.955e-01  -0.093
## high.educPost Graduate Degree        6.473e-01  8.958e-01   0.723
## high.educSome College                7.895e-01  8.304e-01   0.951
## hormone_scr_ert_mean:putamen_posvsneg_feedback_z -7.443e-03  8.916e-03  -0.835
##                                         Pr(>|t|)
## (Intercept)                          0.7694
## PDS_score                             3.09e-05 ***
## hormone_sal_end_min_since_midnight    0.9839
## hormone_scr_ert_mean                  0.6163
## putamen_posvsneg_feedback_z           0.7150
## race.ethnicity.5levelBlack            0.4336
## race.ethnicity.5levelMixed            0.2977
## race.ethnicity.5levelOther            0.5504
## race.ethnicity.5levelWhite            0.0626 .
## demo_race_hispanic1                  0.8142
## interview_age                         0.1436
## MRI_minus_hormone_date_time           0.0138 *
## bmi                                    0.2158
## household.income[>=200K]              0.0158 *
## household.income[100K-200K]           0.1040
## household.income[12K-16K]            0.8093
## household.income[16K-25K]            0.2013
## household.income[25K-35K]            0.9259
## household.income[35K-50K]            0.3052
## household.income[50K-75K]            0.1746
## household.income[5K-12K]             0.6699
## household.income[75K-100K]           0.1655
## high.educBachelor                    0.7569
## high.educHS Diploma/GED              0.9260
## high.educPost Graduate Degree         0.4701
## high.educSome College                 0.3419
## hormone_scr_ert_mean:putamen_posvsneg_feedback_z 0.4040
## ---
## Signif. codes:  0 '***' 0.001 '**' 0.01 '*' 0.05 '.' 0.1 ' ' 1
##
##
## R-sq.(adj) =  0.0304
## lmer.REML = 10266  Scale est. = 16.538    n = 1670

##                                         stdcoef    stdse
## X(Intercept)                          0.000000000 0.000000000
## XPDS_score                             0.115330710 0.02760209
## Xhormone_sal_end_min_since_midnight    0.000528730 0.02626373
## Xhormone_scr_ert_mean                  -0.013037101 0.02601144
## Xputamen_posvsneg_feedback_z           0.020517649 0.05617195

```

```

## Xrace.ethnicity.5levelBlack -0.044411549 0.05670048
## Xrace.ethnicity.5levelMixed 0.056141425 0.05388927
## Xrace.ethnicity.5levelOther -0.023988409 0.04015863
## Xrace.ethnicity.5levelWhite 0.131708229 0.07068338
## Xdemo_race_hispanic1 -0.006937489 0.02951559
## Xinterview_age 0.037587071 0.02568545
## XMRI_minus_hormone_date_time 0.061872798 0.02509295
## Xbmi 0.032166607 0.02597890
## Xhousehold.income[>=200K] -0.143835966 0.05953462
## Xhousehold.income[100K-200K] -0.133332073 0.08195622
## Xhousehold.income[12K-16K] -0.008125934 0.03366959
## Xhousehold.income[16K-25K] -0.047556563 0.03720010
## Xhousehold.income[25K-35K] 0.004173189 0.04486651
## Xhousehold.income[35K-50K] -0.051067343 0.04978478
## Xhousehold.income[50K-75K] -0.079750317 0.05871535
## Xhousehold.income[5K-12K] -0.014313446 0.03357519
## Xhousehold.income[75K-100K] -0.089722196 0.06467499
## Xhigh.educBachelor 0.022768379 0.07354601
## Xhigh.educHS Diploma/GED -0.004090378 0.04403856
## Xhigh.educPost Graduate Degree 0.059164610 0.08188457
## Xhigh.educSome College 0.062877813 0.06613379
## Xhormone_scr_ert_mean:putamen_posvsneg_feedback_z -0.046887713 0.05617029

```

## Male participants

```

## Warning: Some predictor variables are on very different scales: consider
## rescaling

```

```

##
## Family: gaussian
## Link function: identity
##
## Formula:
## cbcl_scr_syn_internal_r ~ PDS_score + hormone_sal_end_min_since_midnight +
##   hormone_scr_ert_mean * putamen_posvsneg_feedback_z + race.ethnicity.5level +
##   demo_race_hispanic + interview_age + MRI_minus_hormone_date_time +
##   bmi + household.income + high.educ
##
## Parametric coefficients:
##
##               Estimate Std. Error t value
## (Intercept)  3.032e+00  2.720e+00  1.114
## PDS_score    7.563e-01  2.821e-01  2.681
## hormone_sal_end_min_since_midnight 8.772e-04  8.102e-04  1.083
## hormone_scr_ert_mean 5.471e-03  9.391e-03  0.583
## putamen_posvsneg_feedback_z 1.313e-01  3.403e-01  0.386
## race.ethnicity.5levelBlack 4.954e-02  1.141e+00  0.043
## race.ethnicity.5levelMixed 1.257e+00  1.111e+00  1.131
## race.ethnicity.5levelOther 4.109e-01  1.247e+00  0.329
## race.ethnicity.5levelWhite 1.383e+00  1.049e+00  1.319
## demo_race_hispanic1 2.583e-02  4.233e-01  0.061
## interview_age 2.037e-03  1.770e-02  0.115
## MRI_minus_hormone_date_time 1.932e-05  1.826e-05  1.058
## bmi          1.351e-02  3.797e-02  0.356

```

```

## household.income[>=200K] -3.061e+00 1.034e+00 -2.959
## household.income[100K-200K] -2.674e+00 9.775e-01 -2.735
## household.income[12K-16K] -4.539e-01 1.254e+00 -0.362
## household.income[16K-25K] 3.263e-01 1.080e+00 0.302
## household.income[25K-35K] -7.394e-01 1.060e+00 -0.698
## household.income[35K-50K] -6.608e-01 1.027e+00 -0.643
## household.income[50K-75K] -1.991e+00 9.753e-01 -2.041
## household.income[5K-12K] -6.369e-02 1.132e+00 -0.056
## household.income[75K-100K] -2.645e+00 9.954e-01 -2.657
## high.educBachelor 1.113e+00 9.740e-01 1.143
## high.educHS Diploma/GED -1.187e+00 1.008e+00 -1.178
## high.educPost Graduate Degree 3.073e-01 9.768e-01 0.315
## high.educSome College 6.404e-01 9.298e-01 0.689
## hormone_scr_ert_mean:putamen_posvsneg_feedback_z -1.569e-03 1.013e-02 -0.155
## Pr(>|t|)
## (Intercept) 0.26525
## PDS_score 0.00742 **
## hormone_sal_end_min_since_midnight 0.27908
## hormone_scr_ert_mean 0.56029
## putamen_posvsneg_feedback_z 0.69971
## race.ethnicity.5levelBlack 0.96539
## race.ethnicity.5levelMixed 0.25814
## race.ethnicity.5levelOther 0.74190
## race.ethnicity.5levelWhite 0.18743
## demo_race_hispanic1 0.95135
## interview_age 0.90837
## MRI_minus_hormone_date_time 0.29025
## bmi 0.72197
## household.income[>=200K] 0.00313 **
## household.income[100K-200K] 0.00630 **
## household.income[12K-16K] 0.71746
## household.income[16K-25K] 0.76251
## household.income[25K-35K] 0.48540
## household.income[35K-50K] 0.52019
## household.income[50K-75K] 0.04137 *
## household.income[5K-12K] 0.95515
## household.income[75K-100K] 0.00796 **
## high.educBachelor 0.25337
## high.educHS Diploma/GED 0.23915
## high.educPost Graduate Degree 0.75306
## high.educSome College 0.49109
## hormone_scr_ert_mean:putamen_posvsneg_feedback_z 0.87697
## ---
## Signif. codes: 0 '***' 0.001 '**' 0.01 '*' 0.05 '.' 0.1 ' ' 1
##
##
## R-sq.(adj) = 0.0333
## lmer.REML = 10467 Scale est. = 13.594 n = 1682

##
## stdcoef stdse
## X(Intercept) 0.000000000 0.000000000
## XPDS_score 0.068534018 0.02556388
## Xhormone_sal_end_min_since_midnight 0.028182902 0.02602935
## Xhormone_scr_ert_mean 0.014567676 0.02500765

```

```

## Xputamen_posvsneg_feedback_z          0.020857539 0.05406622
## Xrace.ethnicity.5levelBlack           0.002694687 0.06208699
## Xrace.ethnicity.5levelMixed           0.073203599 0.06471409
## Xrace.ethnicity.5levelOther           0.015832572 0.04806535
## Xrace.ethnicity.5levelWhite           0.112431933 0.08525560
## Xdemo_race_hispanic1                  0.001809104 0.02964780
## Xinterview_age                         0.002798632 0.02431281
## XMRI_minus_hormone_date_time          0.026335395 0.02489377
## Xbmi                                   0.008980047 0.02523287
## Xhousehold.income[>=200K]             -0.187535979 0.06337130
## Xhousehold.income[100K-200K]          -0.227561882 0.08319984
## Xhousehold.income[12K-16K]            -0.011661282 0.03222053
## Xhousehold.income[16K-25K]            0.011647426 0.03853811
## Xhousehold.income[25K-35K]            -0.028656648 0.04106723
## Xhousehold.income[35K-50K]            -0.030255036 0.04703856
## Xhousehold.income[50K-75K]            -0.124677979 0.06107552
## Xhousehold.income[5K-12K]             -0.001946748 0.03461195
## Xhousehold.income[75K-100K]           -0.170460175 0.06415027
## Xhigh.educBachelor                     0.089463373 0.07829837
## Xhigh.educHS Diploma/GED              -0.050051657 0.04250562
## Xhigh.educPost Graduate Degree         0.027100249 0.08612701
## Xhigh.educSome College                 0.049194568 0.07142804
## Xhormone_scr_ert_mean:putamen_posvsneg_feedback_z -0.008358016 0.05397823

```

#### 4.20 Model: CBCL internalizing factor ~ Testosterone x Lateral OFC activity (anticipation stage) + PDS

##### Female participants

```

## Warning: Some predictor variables are on very different scales: consider
## rescaling

##
## Family: gaussian
## Link function: identity
##
## Formula:
## cbcl_scr_syn_internal_r ~ PDS_score + hormone_sal_end_min_since_midnight +
##   hormone_scr_ert_mean * lOFC_rvsn_ant_z + race.ethnicity.5level +
##   demo_race_hispanic + interview_age + MRI_minus_hormone_date_time +
##   bmi + household.income + high.educ
##
## Parametric coefficients:
##               Estimate Std. Error t value Pr(>|t|)
## (Intercept)   -3.576e-01 2.632e+00  -0.136 0.891931
## PDS_score      7.860e-01 2.081e-01  3.777 0.000165 ***
## hormone_sal_end_min_since_midnight -1.128e-04 8.038e-04  -0.140 0.888419
## hormone_scr_ert_mean -4.293e-03 8.278e-03  -0.519 0.604115
## lOFC_rvsn_ant_z  6.104e-01 5.218e-01  1.170 0.242248
## race.ethnicity.5levelBlack -7.362e-01 9.112e-01  -0.808 0.419225
## race.ethnicity.5levelMixed  9.211e-01 8.745e-01  1.053 0.292372
## race.ethnicity.5levelOther -4.026e-01 1.057e+00  -0.381 0.703414
## race.ethnicity.5levelWhite  1.486e+00 8.081e-01  1.838 0.066195 .

```

```

## demo_race_hispanic1          -2.115e-01  4.071e-01  -0.520  0.603430
## interview_age                 2.787e-02  1.833e-02   1.520  0.128701
## MRI_minus_hormone_date_time  4.028e-05  1.649e-05   2.443  0.014667 *
## bmi                           5.615e-02  3.685e-02   1.524  0.127799
## household.income[>=200K]     -2.815e+00  1.006e+00  -2.797  0.005211 **
## household.income[100K-200K] -1.934e+00  9.363e-01  -2.065  0.039040 *
## household.income[12K-16K]    -6.029e-01  1.170e+00  -0.515  0.606359
## household.income[16K-25K]    -1.797e+00  1.074e+00  -1.673  0.094437 .
## household.income[25K-35K]    -3.892e-01  9.778e-01  -0.398  0.690686
## household.income[35K-50K]    -1.382e+00  9.568e-01  -1.444  0.148919
## household.income[50K-75K]    -1.667e+00  9.413e-01  -1.771  0.076733 .
## household.income[5K-12K]     -8.864e-01  1.141e+00  -0.777  0.437233
## household.income[75K-100K]   -1.696e+00  9.467e-01  -1.791  0.073468 .
## high.educBachelor            1.784e-01  8.990e-01   0.198  0.842708
## high.educHS Diploma/GED     -1.461e-01  9.125e-01  -0.160  0.872835
## high.educPost Graduate Degree 6.039e-01  9.139e-01   0.661  0.508835
## high.educSome College        7.079e-01  8.470e-01   0.836  0.403433
## hormone_scr_ert_mean:l0FC_rvsn_ant_z -9.843e-03  1.361e-02  -0.723  0.469561
## ---
## Signif. codes:  0 '***' 0.001 '**' 0.01 '*' 0.05 '.' 0.1 ' ' 1
##
##
## R-sq.(adj) =  0.0294
## lmer.REML = 10216  Scale est. = 15.996    n = 1661

##
##                stdcoef      stdse
## X(Intercept)      0.000000000  0.00000000
## XPDS_score        0.104746582  0.02773426
## Xhormone_sal_end_min_since_midnight -0.003687643  0.02627883
## Xhormone_scr_ert_mean -0.013494577  0.02602156
## Xl0FC_rvsn_ant_z   0.063432726  0.05422481
## Xrace.ethnicity.5levelBlack -0.045639980  0.05648720
## Xrace.ethnicity.5levelMixed  0.056745812  0.05387572
## Xrace.ethnicity.5levelOther -0.015356376  0.04032850
## Xrace.ethnicity.5levelWhite  0.129825103  0.07062113
## Xdemo_race_hispanic1 -0.015339838  0.02952377
## Xinterview_age     0.039176287  0.02577367
## XMRI_minus_hormone_date_time  0.061614882  0.02521989
## Xbmi               0.039691154  0.02605069
## Xhousehold.income[>=200K] -0.168194580  0.06012462
## Xhousehold.income[100K-200K] -0.170775785  0.08268316
## Xhousehold.income[12K-16K]  -0.017310467  0.03358796
## Xhousehold.income[16K-25K]  -0.062289719  0.03722310
## Xhousehold.income[25K-35K]  -0.017816369  0.04476538
## Xhousehold.income[35K-50K]  -0.072123932  0.04994592
## Xhousehold.income[50K-75K]  -0.105224325  0.05941246
## Xhousehold.income[5K-12K]   -0.026064076  0.03354171
## Xhousehold.income[75K-100K] -0.116821517  0.06522467
## Xhigh.educBachelor        0.014892711  0.07504037
## Xhigh.educHS Diploma/GED  -0.007164273  0.04475327
## Xhigh.educPost Graduate Degree 0.055078794  0.08335187
## Xhigh.educSome College     0.056297632  0.06736406
## Xhormone_scr_ert_mean:l0FC_rvsn_ant_z -0.039302819  0.05433350

```

## Male participants

```
## Warning: Some predictor variables are on very different scales: consider
## rescaling

##
## Family: gaussian
## Link function: identity
##
## Formula:
## cbcl_scr_syn_internal_r ~ PDS_score + hormone_sal_end_min_since_midnight +
##   hormone_scr_ert_mean * l0FC_rvsn_ant_z + race.ethnicity.5level +
##   demo_race_hispanic + interview_age + MRI_minus_hormone_date_time +
##   bmi + household.income + high.educ
##
## Parametric coefficients:
##               Estimate Std. Error t value Pr(>|t|)
## (Intercept)    2.338e+00  2.698e+00  0.867   0.3863
## PDS_score       7.071e-01  2.849e-01  2.482   0.0132 *
## hormone_sal_end_min_since_midnight  6.298e-04  8.136e-04  0.774   0.4390
## hormone_scr_ert_mean  7.931e-03  9.329e-03  0.850   0.3953
## l0FC_rvsn_ant_z  3.156e-01  4.841e-01  0.652   0.5145
## race.ethnicity.5levelBlack -1.390e-02  1.146e+00 -0.012   0.9903
## race.ethnicity.5levelMixed  1.250e+00  1.113e+00  1.124   0.2613
## race.ethnicity.5levelOther  4.802e-01  1.245e+00  0.386   0.6999
## race.ethnicity.5levelWhite  1.393e+00  1.051e+00  1.326   0.1850
## demo_race_hispanic1  2.391e-02  4.254e-01  0.056   0.9552
## interview_age    5.941e-03  1.758e-02  0.338   0.7354
## MRI_minus_hormone_date_time  2.295e-05  1.874e-05  1.224   0.2210
## bmi              3.536e-03  3.781e-02  0.093   0.9255
## household.income[>=200K] -2.426e+00  1.044e+00 -2.323   0.0203 *
## household.income[100K-200K] -2.000e+00  9.897e-01 -2.021   0.0435 *
## household.income[12K-16K]   1.615e-01  1.279e+00  0.126   0.8995
## household.income[16K-25K]   1.060e+00  1.087e+00  0.975   0.3295
## household.income[25K-35K]  -1.831e-01  1.067e+00 -0.172   0.8637
## household.income[35K-50K]  -7.989e-02  1.037e+00 -0.077   0.9386
## household.income[50K-75K]  -1.448e+00  9.880e-01 -1.465   0.1430
## household.income[5K-12K]    6.693e-01  1.137e+00  0.589   0.5560
## household.income[75K-100K] -2.074e+00  1.007e+00 -2.059   0.0396 *
## high.educBachelor   1.086e+00  9.544e-01  1.138   0.2554
## high.educHS Diploma/GED -1.054e+00  9.944e-01 -1.060   0.2893
## high.educPost Graduate Degree  2.116e-01  9.571e-01  0.221   0.8251
## high.educSome College  5.627e-01  9.118e-01  0.617   0.5372
## hormone_scr_ert_mean:l0FC_rvsn_ant_z -1.418e-02  1.334e-02 -1.063   0.2881
## ---
## Signif. codes:  0 '***' 0.001 '**' 0.01 '*' 0.05 '.' 0.1 ' ' 1
##
##
## R-sq.(adj) =  0.0342
## lmer.REML = 10343  Scale est. = 13.518    n = 1668

##               stdcoef      stdse
## X(Intercept)  0.0000000000 0.00000000
## XPDS_score    0.0635357637 0.02559995
```

```

## Xhormone_sal_end_min_since_midnight      0.0203658800 0.02630882
## Xhormone_scr_ert_mean                    0.0213564043 0.02511965
## XlOFC_rvsn_ant_z                        0.0351253145 0.05387880
## Xrace.ethnicity.5levelBlack             -0.0007561635 0.06235132
## Xrace.ethnicity.5levelMixed             0.0731683973 0.06511948
## Xrace.ethnicity.5levelOther             0.0188659068 0.04893149
## Xrace.ethnicity.5levelWhite            0.1140575360 0.08600439
## Xdemo_race_hispanic1                   0.0016926342 0.03011215
## Xinterview_age                          0.0082468688 0.02440154
## XMRI_minus_hormone_date_time           0.0305979914 0.02498910
## Xbmi                                     0.0023694367 0.02534187
## Xhousehold.income[>=200K]              -0.1508702540 0.06494212
## Xhousehold.income[100K-200K]           -0.1716318367 0.08493992
## Xhousehold.income[12K-16K]             0.0040879983 0.03237153
## Xhousehold.income[16K-25K]             0.0383688925 0.03933353
## Xhousehold.income[25K-35K]            -0.0072369356 0.04215332
## Xhousehold.income[35K-50K]            -0.0037078429 0.04812370
## Xhousehold.income[50K-75K]            -0.0913805451 0.06235683
## Xhousehold.income[5K-12K]             0.0207416038 0.03521933
## Xhousehold.income[75K-100K]           -0.1353923860 0.06574764
## Xhigh.educBachelor                     0.0880595540 0.07740709
## Xhigh.educHS Diploma/GED              -0.0441724983 0.04167435
## Xhigh.educPost Graduate Degree         0.0188520680 0.08529288
## Xhigh.educSome College                 0.0435863506 0.07062695
## Xhormone_scr_ert_mean:lOFC_rvsn_ant_z -0.0571062415 0.05373913

```

#### 4.21 Model: CBCL internalizing factor ~ Testosterone x Medial OFC activity (anticipation stage) + PDS

##### Female participants

```

## Warning: Some predictor variables are on very different scales: consider
## rescaling

##
## Family: gaussian
## Link function: identity
##
## Formula:
## cbcl_scr_syn_internal_r ~ PDS_score + hormone_sal_end_min_since_midnight +
##   hormone_scr_ert_mean * mOFC_rvsn_ant_z + race.ethnicity.5level +
##   demo_race_hispanic + interview_age + MRI_minus_hormone_date_time +
##   bmi + household.income + high.educ
##
## Parametric coefficients:
##               Estimate Std. Error t value Pr(>|t|)
## (Intercept)   -5.152e-01 2.631e+00  -0.196 0.844796
## PDS_score      7.833e-01 2.083e-01   3.760 0.000176 ***
## hormone_sal_end_min_since_midnight -1.243e-04 8.037e-04  -0.155 0.877142
## hormone_scr_ert_mean -3.450e-03 8.260e-03  -0.418 0.676204
## mOFC_rvsn_ant_z  5.145e-01 4.421e-01   1.164 0.244700
## race.ethnicity.5levelBlack -7.166e-01 9.106e-01  -0.787 0.431409
## race.ethnicity.5levelMixed  8.955e-01 8.751e-01   1.023 0.306322

```



```

## race.ethnicity.5levelOther      -4.112e-01  1.056e+00  -0.390  0.696916
## race.ethnicity.5levelWhite      1.512e+00  8.080e-01   1.871  0.061506 .
## demo_race_hispanic1            -2.349e-01  4.073e-01  -0.577  0.564241
## interview_age                   2.814e-02  1.835e-02   1.533  0.125465
## MRI_minus_hormone_date_time     3.977e-05  1.648e-05   2.413  0.015912 *
## bmi                             5.756e-02  3.685e-02   1.562  0.118485
## household.income[>=200K]        -2.924e+00  1.006e+00  -2.905  0.003719 **
## household.income[100K-200K]     -1.954e+00  9.363e-01  -2.087  0.037036 *
## household.income[12K-16K]       -7.172e-01  1.163e+00  -0.617  0.537600
## household.income[16K-25K]       -1.792e+00  1.073e+00  -1.670  0.095061 .
## household.income[25K-35K]       -3.777e-01  9.745e-01  -0.388  0.698376
## household.income[35K-50K]       -1.436e+00  9.568e-01  -1.501  0.133618
## household.income[50K-75K]       -1.705e+00  9.411e-01  -1.812  0.070152 .
## household.income[5K-12K]        -9.008e-01  1.141e+00  -0.790  0.429911
## household.income[75K-100K]      -1.735e+00  9.465e-01  -1.832  0.067062 .
## high.educBachelor               3.065e-01  8.933e-01   0.343  0.731563
## high.educHS Diploma/GED        -2.041e-02  9.045e-01  -0.023  0.981997
## high.educPost Graduate Degree    7.162e-01  9.087e-01   0.788  0.430681
## high.educSome College           7.948e-01  8.405e-01   0.946  0.344476
## hormone_scr_ert_mean:mOFC_rvsn_ant_z -7.698e-03  1.118e-02  -0.689  0.491147
## ---
## Signif. codes:  0 '***' 0.001 '**' 0.01 '*' 0.05 '.' 0.1 ' ' 1
##
##
## R-sq.(adj) =  0.0299
## lmer.REML = 10216  Scale est. = 15.823    n = 1661

##
##                stdcoef      stdse
## X(Intercept)      0.00000000  0.00000000
## XPDS_score        0.104543983  0.02780055
## Xhormone_sal_end_min_since_midnight -0.004057655  0.02624318
## Xhormone_scr_ert_mean -0.010853035  0.02598141
## XmOFC_rvsn_ant_z  0.062329912  0.05356011
## Xrace.ethnicity.5levelBlack -0.044514610  0.05656396
## Xrace.ethnicity.5levelMixed  0.055163530  0.05390795
## Xrace.ethnicity.5levelOther -0.015787648  0.04052740
## Xrace.ethnicity.5levelWhite  0.132254229  0.07068147
## Xdemo_race_hispanic1 -0.017054686  0.02957433
## Xinterview_age    0.039474614  0.02574959
## XMRI_minus_hormone_date_time  0.060825339  0.02520265
## Xbmi              0.040700622  0.02605699
## Xhousehold.income[>=200K] -0.174682968  0.06012713
## Xhousehold.income[100K-200K] -0.172327460  0.08256871
## Xhousehold.income[12K-16K] -0.020842081  0.03380292
## Xhousehold.income[16K-25K] -0.062125378  0.03719522
## Xhousehold.income[25K-35K] -0.017442051  0.04500217
## Xhousehold.income[35K-50K] -0.074954807  0.04994552
## Xhousehold.income[50K-75K] -0.107644831  0.05940291
## Xhousehold.income[5K-12K] -0.026486124  0.03354625
## Xhousehold.income[75K-100K] -0.119497517  0.06521077
## Xhigh.educBachelor  0.025530327  0.07440945
## Xhigh.educHS Diploma/GED -0.001004876  0.04452621
## Xhigh.educPost Graduate Degree  0.065301372  0.08284631
## Xhigh.educSome College  0.063318618  0.06695899

```

```
## Xhormone_scr_ert_mean:mOFC_rvsn_ant_z -0.036416732 0.05288203
```

### Male participants

```
## Warning: Some predictor variables are on very different scales: consider  
## rescaling
```

```
##
```

```
## Family: gaussian
```

```
## Link function: identity
```

```
##
```

```
## Formula:
```

```
## cbcl_scr_syn_internal_r ~ PDS_score + hormone_sal_end_min_since_midnight +
```

```
## hormone_scr_ert_mean * mOFC_rvsn_ant_z + race.ethnicity.5level +
```

```
## demo_race_hispanic + interview_age + MRI_minus_hormone_date_time +
```

```
## bmi + household.income + high.educ
```

```
##
```

```
## Parametric coefficients:
```

|                                         | Estimate   | Std. Error | t value | Pr(> t )   |
|-----------------------------------------|------------|------------|---------|------------|
| ## (Intercept)                          | 2.703e+00  | 2.708e+00  | 0.998   | 0.31820    |
| ## PDS_score                            | 7.821e-01  | 2.850e-01  | 2.744   | 0.00613 ** |
| ## hormone_sal_end_min_since_midnight   | 4.927e-04  | 8.147e-04  | 0.605   | 0.54545    |
| ## hormone_scr_ert_mean                 | 7.250e-03  | 9.410e-03  | 0.770   | 0.44114    |
| ## mOFC_rvsn_ant_z                      | -6.111e-02 | 4.207e-01  | -0.145  | 0.88453    |
| ## race.ethnicity.5levelBlack           | 1.047e-01  | 1.152e+00  | 0.091   | 0.92760    |
| ## race.ethnicity.5levelMixed           | 1.222e+00  | 1.118e+00  | 1.093   | 0.27450    |
| ## race.ethnicity.5levelOther           | 5.220e-01  | 1.254e+00  | 0.416   | 0.67722    |
| ## race.ethnicity.5levelWhite           | 1.415e+00  | 1.057e+00  | 1.339   | 0.18070    |
| ## demo_race_hispanic1                  | 4.574e-03  | 4.264e-01  | 0.011   | 0.99144    |
| ## interview_age                        | 6.684e-03  | 1.767e-02  | 0.378   | 0.70523    |
| ## MRI_minus_hormone_date_time          | 2.166e-05  | 1.876e-05  | 1.154   | 0.24855    |
| ## bmi                                  | 5.221e-03  | 3.796e-02  | 0.138   | 0.89060    |
| ## household.income[>=200K]             | -3.041e+00 | 1.036e+00  | -2.935  | 0.00339 ** |
| ## household.income[100K-200K]          | -2.658e+00 | 9.809e-01  | -2.710  | 0.00680 ** |
| ## household.income[12K-16K]            | -4.887e-01 | 1.255e+00  | -0.390  | 0.69694    |
| ## household.income[16K-25K]            | 3.425e-01  | 1.077e+00  | 0.318   | 0.75050    |
| ## household.income[25K-35K]            | -9.402e-01 | 1.060e+00  | -0.887  | 0.37508    |
| ## household.income[35K-50K]            | -6.699e-01 | 1.030e+00  | -0.651  | 0.51534    |
| ## household.income[50K-75K]            | -2.107e+00 | 9.775e-01  | -2.155  | 0.03127 *  |
| ## household.income[5K-12K]             | 4.270e-02  | 1.131e+00  | 0.038   | 0.96988    |
| ## household.income[75K-100K]           | -2.680e+00 | 9.984e-01  | -2.685  | 0.00733 ** |
| ## high.educBachelor                    | 1.216e+00  | 9.582e-01  | 1.269   | 0.20461    |
| ## high.educHS Diploma/GED              | -1.053e+00 | 9.958e-01  | -1.057  | 0.29050    |
| ## high.educPost Graduate Degree        | 3.845e-01  | 9.609e-01  | 0.400   | 0.68912    |
| ## high.educSome College                | 7.744e-01  | 9.137e-01  | 0.847   | 0.39685    |
| ## hormone_scr_ert_mean:mOFC_rvsn_ant_z | -4.277e-03 | 1.189e-02  | -0.360  | 0.71909    |

```
## ---
```

```
## Signif. codes: 0 '***' 0.001 '**' 0.01 '*' 0.05 '.' 0.1 ' ' 1
```

```
##
```

```
##
```

```
## R-sq.(adj) = 0.0332
```

```
## lmer.REML = 10402 Scale est. = 13.455 n = 1674
```

```
##
```

```
stdcoef stdse
```

```

## X(Intercept)                0.000000000 0.00000000
## XPDS_score                   0.070145617 0.02555960
## Xhormone_sal_end_min_since_midnight 0.015844699 0.02620180
## Xhormone_scr_ert_mean       0.019369257 0.02514020
## XmOFC_rvsn_ant_z           -0.007715799 0.05312078
## Xrace.ethnicity.5levelBlack 0.005701167 0.06273238
## Xrace.ethnicity.5levelMixed 0.071610801 0.06551051
## Xrace.ethnicity.5levelOther 0.020355788 0.04889339
## Xrace.ethnicity.5levelWhite 0.115576142 0.08630511
## Xdemo_race_hispanic1       0.000321012 0.02992606
## Xinterview_age              0.009201865 0.02432205
## XMRI_minus_hormone_date_time 0.028802919 0.02495284
## Xbmi                         0.003484347 0.02532947
## Xhousehold.income[>=200K]   -0.187428629 0.06386806
## Xhousehold.income[100K-200K] -0.226984391 0.08376461
## Xhousehold.income[12K-16K]  -0.012634421 0.03243547
## Xhousehold.income[16K-25K]   0.012388411 0.03895241
## Xhousehold.income[25K-35K]  -0.036666823 0.04132726
## Xhousehold.income[35K-50K]  -0.030737006 0.04723814
## Xhousehold.income[50K-75K]  -0.132480894 0.06146333
## Xhousehold.income[5K-12K]    0.001313206 0.03477240
## Xhousehold.income[75K-100K] -0.173180258 0.06450498
## Xhigh.educBachelor           0.098144370 0.07733752
## Xhigh.educHS Diploma/GED    -0.044231064 0.04183129
## Xhigh.educPost Graduate Degree 0.034025017 0.08503701
## Xhigh.educSome College       0.059716333 0.07046297
## Xhormone_scr_ert_mean:mOFC_rvsn_ant_z -0.019162481 0.05326820

```

## 4.22 Model: CBCL internalizing factor ~ Testosterone x Lateral OFC activity (feedback stage) + PDS

### Female participants

```

## Warning: Some predictor variables are on very different scales: consider
## rescaling

##
## Family: gaussian
## Link function: identity
##
## Formula:
## cbcl_scr_syn_internal_r ~ PDS_score + hormone_sal_end_min_since_midnight +
##   hormone_scr_ert_mean * lOFC_posvsneg_feedback_z + race.ethnicity.5level +
##   demo_race_hispanic + interview_age + MRI_minus_hormone_date_time +
##   bmi + household.income + high.educ
##
## Parametric coefficients:
##                               Estimate Std. Error t value
## (Intercept)                  -6.786e-01 2.622e+00  -0.259
## PDS_score                      7.605e-01 2.078e-01  3.661
## hormone_sal_end_min_since_midnight -1.261e-04 8.027e-04  -0.157
## hormone_scr_ert_mean           -3.526e-03 8.277e-03  -0.426
## lOFC_posvsneg_feedback_z       7.349e-02 5.803e-01  0.127

```

```

## race.ethnicity.5levelBlack          -6.927e-01  9.109e-01  -0.760
## race.ethnicity.5levelMixed          9.582e-01  8.729e-01  1.098
## race.ethnicity.5levelOther         -6.081e-01  1.056e+00  -0.576
## race.ethnicity.5levelWhite          1.471e+00  8.068e-01  1.824
## demo_race_hispanic1                -2.006e-01  4.089e-01  -0.490
## interview_age                       2.929e-02  1.833e-02  1.598
## MRI_minus_hormone_date_time         4.161e-05  1.646e-05  2.528
## bmi                                  5.384e-02  3.675e-02  1.465
## household.income[>=200K]            -2.683e+00  9.934e-01  -2.701
## household.income[100K-200K]         -1.750e+00  9.228e-01  -1.897
## household.income[12K-16K]           -5.499e-01  1.157e+00  -0.475
## household.income[16K-25K]           -1.625e+00  1.061e+00  -1.531
## household.income[25K-35K]           -1.229e-01  9.647e-01  -0.127
## household.income[35K-50K]           -1.140e+00  9.448e-01  -1.206
## household.income[50K-75K]           -1.490e+00  9.291e-01  -1.604
## household.income[5K-12K]            -9.107e-01  1.131e+00  -0.805
## household.income[75K-100K]          -1.536e+00  9.334e-01  -1.646
## high.educBachelor                    2.144e-01  8.760e-01  0.245
## high.educHS Diploma/GED             3.681e-02  8.911e-01  0.041
## high.educPost Graduate Degree        6.310e-01  8.909e-01  0.708
## high.educSome College                7.253e-01  8.248e-01  0.879
## hormone_scr_ert_mean:lOFC_posvsneg_feedback_z -1.863e-03  1.539e-02  -0.121
##                                     Pr(>|t|)
## (Intercept)                          0.79578
## PDS_score                             0.00026 ***
## hormone_sal_end_min_since_midnight    0.87517
## hormone_scr_ert_mean                  0.67015
## lOFC_posvsneg_feedback_z             0.89924
## race.ethnicity.5levelBlack           0.44708
## race.ethnicity.5levelMixed           0.27247
## race.ethnicity.5levelOther           0.56467
## race.ethnicity.5levelWhite           0.06837 .
## demo_race_hispanic1                  0.62386
## interview_age                         0.11017
## MRI_minus_hormone_date_time           0.01156 *
## bmi                                    0.14310
## household.income[>=200K]              0.00699 **
## household.income[100K-200K]          0.05806 .
## household.income[12K-16K]            0.63451
## household.income[16K-25K]            0.12592
## household.income[25K-35K]            0.89867
## household.income[35K-50K]            0.22790
## household.income[50K-75K]            0.10884
## household.income[5K-12K]             0.42097
## household.income[75K-100K]           0.10004
## high.educBachelor                     0.80668
## high.educHS Diploma/GED              0.96706
## high.educPost Graduate Degree         0.47892
## high.educSome College                 0.37931
## hormone_scr_ert_mean:lOFC_posvsneg_feedback_z 0.90367
## ---
## Signif. codes:  0 '***' 0.001 '**' 0.01 '*' 0.05 '.' 0.1 ' ' 1
##
##

```

```
## R-sq.(adj) = 0.0273
## lmer.REML = 10243 Scale est. = 16.292 n = 1666
```

```
##
##               stdcoef      stdse
## X(Intercept)  0.00000000 0.00000000
## XPDS_score    0.101559643 0.02774393
## Xhormone_sal_end_min_since_midnight -0.004131081 0.02629279
## Xhormone_scr_ert_mean -0.011080969 0.02601086
## XlOFC_posvsneg_feedback_z 0.006830691 0.05393776
## Xrace.ethnicity.5levelBlack -0.043068356 0.05663318
## Xrace.ethnicity.5levelMixed 0.059325835 0.05404287
## Xrace.ethnicity.5levelOther -0.023209519 0.04029198
## Xrace.ethnicity.5levelWhite 0.128952891 0.07070820
## Xdemo_race_hispanic1 -0.014557893 0.02968077
## Xinterview_age 0.041240663 0.02580254
## XMRI_minus_hormone_date_time 0.063719820 0.02520281
## Xbmi 0.038181333 0.02606162
## Xhousehold.income[>=200K] -0.160809143 0.05954018
## Xhousehold.income[100K-200K] -0.154911704 0.08167903
## Xhousehold.income[12K-16K] -0.015992434 0.03363468
## Xhousehold.income[16K-25K] -0.056816533 0.03710685
## Xhousehold.income[25K-35K] -0.005653660 0.04439061
## Xhousehold.income[35K-50K] -0.059348007 0.04920076
## Xhousehold.income[50K-75K] -0.093977319 0.05857871
## Xhousehold.income[5K-12K] -0.026795573 0.03328911
## Xhousehold.income[75K-100K] -0.105923894 0.06436915
## Xhigh.educBachelor 0.017906419 0.07316054
## Xhigh.educHS Diploma/GED 0.001806602 0.04373555
## Xhigh.educPost Graduate Degree 0.057703472 0.08147807
## Xhigh.educSome College 0.057694569 0.06560676
## Xhormone_scr_ert_mean:lOFC_posvsneg_feedback_z -0.006520132 0.05386592
```

## Male participants

```
## Warning: Some predictor variables are on very different scales: consider
## rescaling
```

```
##
## Family: gaussian
## Link function: identity
##
## Formula:
## cbcl_scr_syn_internal_r ~ PDS_score + hormone_sal_end_min_since_midnight +
##   hormone_scr_ert_mean * lOFC_posvsneg_feedback_z + race.ethnicity.5level +
##   demo_race_hispanic + interview_age + MRI_minus_hormone_date_time +
##   bmi + household.income + high.educ
##
## Parametric coefficients:
##               Estimate Std. Error t value
## (Intercept)  2.787e+00  2.705e+00  1.031
## PDS_score    7.408e-01  2.848e-01  2.601
## hormone_sal_end_min_since_midnight 7.373e-04  8.157e-04  0.904
## hormone_scr_ert_mean 6.196e-03  9.377e-03  0.661
```

```

## lOFC_posvsneg_feedback_z          1.096e-01  5.400e-01  0.203
## race.ethnicity.5levelBlack        2.362e-02  1.148e+00  0.021
## race.ethnicity.5levelMixed        1.273e+00  1.118e+00  1.139
## race.ethnicity.5levelOther        3.950e-01  1.251e+00  0.316
## race.ethnicity.5levelWhite        1.432e+00  1.056e+00  1.356
## demo_race_hispanic1              7.979e-02  4.270e-01  0.187
## interview_age                     1.818e-03  1.766e-02  0.103
## MRI_minus_hormone_date_time      2.230e-05  1.829e-05  1.219
## bmi                               1.377e-02  3.807e-02  0.362
## household.income[>=200K]         -2.829e+00  1.071e+00 -2.640
## household.income[100K-200K]      -2.430e+00  1.018e+00 -2.388
## household.income[12K-16K]        -3.698e-01  1.290e+00 -0.287
## household.income[16K-25K]         7.271e-01  1.122e+00  0.648
## household.income[25K-35K]        -8.239e-01  1.100e+00 -0.749
## household.income[35K-50K]        -5.168e-01  1.064e+00 -0.486
## household.income[50K-75K]       -1.810e+00  1.017e+00 -1.780
## household.income[5K-12K]          5.034e-01  1.155e+00  0.436
## household.income[75K-100K]       -2.468e+00  1.035e+00 -2.385
## high.educBachelor                 1.219e+00  9.702e-01  1.257
## high.educHS Diploma/GED          -8.273e-01  1.004e+00 -0.824
## high.educPost Graduate Degree     3.934e-01  9.726e-01  0.404
## high.educSome College             7.829e-01  9.268e-01  0.845
## hormone_scr_ert_mean:lOFC_posvsneg_feedback_z -8.987e-04  1.521e-02 -0.059
##                                     Pr(>|t|)
## (Intercept)                       0.30291
## PDS_score                          0.00938 **
## hormone_sal_end_min_since_midnight 0.36621
## hormone_scr_ert_mean               0.50882
## lOFC_posvsneg_feedback_z          0.83921
## race.ethnicity.5levelBlack        0.98358
## race.ethnicity.5levelMixed        0.25490
## race.ethnicity.5levelOther        0.75213
## race.ethnicity.5levelWhite        0.17536
## demo_race_hispanic1              0.85178
## interview_age                     0.91804
## MRI_minus_hormone_date_time      0.22304
## bmi                               0.71769
## household.income[>=200K]         0.00836 **
## household.income[100K-200K]      0.01706 *
## household.income[12K-16K]        0.77444
## household.income[16K-25K]         0.51695
## household.income[25K-35K]         0.45396
## household.income[35K-50K]         0.62731
## household.income[50K-75K]         0.07525 .
## household.income[5K-12K]          0.66291
## household.income[75K-100K]       0.01720 *
## high.educBachelor                 0.20901
## high.educHS Diploma/GED          0.40987
## high.educPost Graduate Degree     0.68593
## high.educSome College             0.39840
## hormone_scr_ert_mean:lOFC_posvsneg_feedback_z 0.95288
## ---
## Signif. codes:  0 '***' 0.001 '**' 0.01 '*' 0.05 '.' 0.1 ' ' 1
##

```

```

##
## R-sq.(adj) = 0.0333
## lmer.REML = 10340 Scale est. = 13.487 n = 1665

##
##                               stdcoef    stdse
## X(Intercept)                   0.00000000 0.00000000
## XPDS_score                      0.066814104 0.02568905
## Xhormone_sal_end_min_since_midnight 0.023737089 0.02626255
## Xhormone_scr_ert_mean            0.016612408 0.02513932
## XlOFC_posvsneg_feedback_z       0.010798470 0.05321196
## Xrace.ethnicity.5levelBlack      0.001277318 0.06205891
## Xrace.ethnicity.5levelMixed      0.074080380 0.06504407
## Xrace.ethnicity.5levelOther      0.015377485 0.04868102
## Xrace.ethnicity.5levelWhite      0.116545600 0.08596318
## Xdemo_race_hispanic1            0.005606457 0.03000074
## Xinterview_age                   0.002511691 0.02440374
## XMRI_minus_hormone_date_time     0.030527328 0.02504381
## Xbmi                             0.009163431 0.02534108
## Xhousehold.income[>=200K]        -0.174680268 0.06615635
## Xhousehold.income[100K-200K]     -0.207851912 0.08704566
## Xhousehold.income[12K-16K]       -0.009464088 0.03302026
## Xhousehold.income[16K-25K]       0.025672491 0.03960632
## Xhousehold.income[25K-35K]       -0.031883324 0.04256757
## Xhousehold.income[35K-50K]       -0.023997428 0.04941662
## Xhousehold.income[50K-75K]       -0.114431743 0.06428418
## Xhousehold.income[5K-12K]        0.015695517 0.03600015
## Xhousehold.income[75K-100K]      -0.160569272 0.06733177
## Xhigh.educBachelor               0.098731927 0.07855870
## Xhigh.educHS Diploma/GED        -0.034724034 0.04212367
## Xhigh.educPost Graduate Degree    0.034890981 0.08626736
## Xhigh.educSome College           0.060260926 0.07134014
## Xhormone_scr_ert_mean:lOFC_posvsneg_feedback_z -0.003150178 0.05330462

```

### 4.23 Model: CBCL internalizing factor ~ Testosterone x Medial OFC activity (feedback stage) + PDS

#### Female participants

```

## Warning: Some predictor variables are on very different scales: consider
## rescaling

##
## Family: gaussian
## Link function: identity
##
## Formula:
## cbcl_scr_syn_internal_r ~ PDS_score + hormone_sal_end_min_since_midnight +
##   hormone_scr_ert_mean * mOFC_posvsneg_feedback_z + race.ethnicity.5level +
##   demo_race_hispanic + interview_age + MRI_minus_hormone_date_time +
##   bmi + household.income + high.educ
##
## Parametric coefficients:
##                               Estimate Std. Error t value

```

```

## (Intercept) -6.142e-01 2.617e+00 -0.235
## PDS_score 7.911e-01 2.069e-01 3.824
## hormone_sal_end_min_since_midnight -5.056e-05 8.017e-04 -0.063
## hormone_scr_ert_mean -3.903e-03 8.260e-03 -0.472
## mOFC_posvsneg_feedback_z 3.936e-01 5.025e-01 0.783
## race.ethnicity.5levelBlack -6.661e-01 9.109e-01 -0.731
## race.ethnicity.5levelMixed 9.851e-01 8.728e-01 1.129
## race.ethnicity.5levelOther -5.960e-01 1.056e+00 -0.564
## race.ethnicity.5levelWhite 1.503e+00 8.072e-01 1.861
## demo_race_hispanic1 -2.092e-01 4.078e-01 -0.513
## interview_age 2.728e-02 1.827e-02 1.493
## MRI_minus_hormone_date_time 4.078e-05 1.643e-05 2.482
## bmi 5.696e-02 3.668e-02 1.553
## household.income[>=200K] -2.661e+00 9.925e-01 -2.681
## household.income[100K-200K] -1.704e+00 9.215e-01 -1.849
## household.income[12K-16K] -5.174e-01 1.154e+00 -0.448
## household.income[16K-25K] -1.642e+00 1.061e+00 -1.549
## household.income[25K-35K] -1.177e-01 9.637e-01 -0.122
## household.income[35K-50K] -1.178e+00 9.428e-01 -1.249
## household.income[50K-75K] -1.469e+00 9.280e-01 -1.583
## household.income[5K-12K] -9.146e-01 1.131e+00 -0.809
## household.income[75K-100K] -1.525e+00 9.331e-01 -1.635
## high.educBachelor 1.956e-01 8.755e-01 0.223
## high.educHS Diploma/GED 1.015e-02 8.910e-01 0.011
## high.educPost Graduate Degree 6.173e-01 8.906e-01 0.693
## high.educSome College 7.275e-01 8.244e-01 0.883
## hormone_scr_ert_mean:mOFC_posvsneg_feedback_z -4.174e-03 1.327e-02 -0.315
## Pr(>|t|)
## (Intercept) 0.814439
## PDS_score 0.000136 ***
## hormone_sal_end_min_since_midnight 0.949727
## hormone_scr_ert_mean 0.636645
## mOFC_posvsneg_feedback_z 0.433582
## race.ethnicity.5levelBlack 0.464763
## race.ethnicity.5levelMixed 0.259182
## race.ethnicity.5levelOther 0.572527
## race.ethnicity.5levelWhite 0.062876 .
## demo_race_hispanic1 0.607953
## interview_age 0.135541
## MRI_minus_hormone_date_time 0.013168 *
## bmi 0.120659
## household.income[>=200K] 0.007420 **
## household.income[100K-200K] 0.064593 .
## household.income[12K-16K] 0.653978
## household.income[16K-25K] 0.121655
## household.income[25K-35K] 0.902848
## household.income[35K-50K] 0.211811
## household.income[50K-75K] 0.113684
## household.income[5K-12K] 0.418873
## household.income[75K-100K] 0.102275
## high.educBachelor 0.823204
## high.educHS Diploma/GED 0.990915
## high.educPost Graduate Degree 0.488311
## high.educSome College 0.377611

```



```

## hormone_scr_ert_mean:mOFC_posvsneg_feedback_z 0.753118
## ---
## Signif. codes:  0 '***' 0.001 '**' 0.01 '*' 0.05 '.' 0.1 ' ' 1
##
##
## R-sq.(adj) =  0.029
## lmer.REML = 10273  Scale est. = 16.096    n = 1671

##
##                               stdcoef    stdse
## X(Intercept)                   0.000000000 0.00000000
## XPDS_score                      0.1057678041 0.02765860
## Xhormone_sal_end_min_since_midnight -0.0016544525 0.02623638
## Xhormone_scr_ert_mean            -0.0122507765 0.02592853
## XmOFC_posvsneg_feedback_z       0.0436755275 0.05576056
## Xrace.ethnicity.5levelBlack      -0.0414175605 0.05664348
## Xrace.ethnicity.5levelMixed       0.0610077576 0.05405059
## Xrace.ethnicity.5levelOther      -0.0227023101 0.04022042
## Xrace.ethnicity.5levelWhite       0.1316270698 0.07071680
## Xdemo_race_hispanic1             -0.0151994818 0.02962310
## Xinterview_age                   0.0383763109 0.02569836
## XMRI_minus_hormone_date_time     0.0624253793 0.02515228
## Xbmi                             0.0403650612 0.02599471
## Xhousehold.income[>=200K]        -0.1591701204 0.05937602
## Xhousehold.income[100K-200K]     -0.1506979211 0.08148892
## Xhousehold.income[12K-16K]       -0.0150164570 0.03349457
## Xhousehold.income[16K-25K]       -0.0573271540 0.03701720
## Xhousehold.income[25K-35K]       -0.0054267195 0.04445075
## Xhousehold.income[35K-50K]       -0.0616026015 0.04931805
## Xhousehold.income[50K-75K]       -0.0927937212 0.05863038
## Xhousehold.income[5K-12K]        -0.0268574568 0.03321550
## Xhousehold.income[75K-100K]      -0.1048522710 0.06413621
## Xhigh.educBachelor                0.0163372336 0.07310990
## Xhigh.educHS Diploma/GED         0.0004970438 0.04364734
## Xhigh.educPost Graduate Degree    0.0564086308 0.08137972
## Xhigh.educSome College            0.0578838175 0.06558730
## Xhormone_scr_ert_mean:mOFC_posvsneg_feedback_z -0.0175650916 0.05583614

```

## Male participants

```

## Warning: Some predictor variables are on very different scales: consider
## rescaling

##
## Family: gaussian
## Link function: identity
##
## Formula:
## cbcl_scr_syn_internal_r ~ PDS_score + hormone_sal_end_min_since_midnight +
##   hormone_scr_ert_mean * mOFC_posvsneg_feedback_z + race.ethnicity.5level +
##   demo_race_hispanic + interview_age + MRI_minus_hormone_date_time +
##   bmi + household.income + high.educ
##
## Parametric coefficients:

```

|                                                  | Estimate   | Std. Error | t value |
|--------------------------------------------------|------------|------------|---------|
| ## (Intercept)                                   | 2.674e+00  | 2.693e+00  | 0.993   |
| ## PDS_score                                     | 7.470e-01  | 2.837e-01  | 2.633   |
| ## hormone_sal_end_min_since_midnight            | 7.420e-04  | 8.123e-04  | 0.913   |
| ## hormone_scr_ert_mean                          | 7.391e-03  | 9.364e-03  | 0.789   |
| ## mOFC_posvsneg_feedback_z                      | -5.372e-01 | 4.515e-01  | -1.190  |
| ## race.ethnicity.5levelBlack                    | -7.376e-02 | 1.144e+00  | -0.064  |
| ## race.ethnicity.5levelMixed                    | 1.274e+00  | 1.114e+00  | 1.144   |
| ## race.ethnicity.5levelOther                    | 3.890e-01  | 1.246e+00  | 0.312   |
| ## race.ethnicity.5levelWhite                    | 1.421e+00  | 1.053e+00  | 1.350   |
| ## demo_race_hispanic1                           | 6.035e-02  | 4.236e-01  | 0.142   |
| ## interview_age                                 | 2.953e-03  | 1.760e-02  | 0.168   |
| ## MRI_minus_hormone_date_time                   | 2.207e-05  | 1.876e-05  | 1.177   |
| ## bmi                                           | 1.444e-02  | 3.790e-02  | 0.381   |
| ## household.income[>=200K]                      | -2.908e+00 | 1.062e+00  | -2.739  |
| ## household.income[100K-200K]                   | -2.490e+00 | 1.008e+00  | -2.471  |
| ## household.income[12K-16K]                     | -3.400e-01 | 1.272e+00  | -0.267  |
| ## household.income[16K-25K]                     | 6.533e-01  | 1.101e+00  | 0.594   |
| ## household.income[25K-35K]                     | -8.746e-01 | 1.090e+00  | -0.802  |
| ## household.income[35K-50K]                     | -5.700e-01 | 1.055e+00  | -0.540  |
| ## household.income[50K-75K]                     | -1.847e+00 | 1.006e+00  | -1.837  |
| ## household.income[5K-12K]                      | 4.606e-01  | 1.145e+00  | 0.402   |
| ## household.income[75K-100K]                    | -2.517e+00 | 1.025e+00  | -2.456  |
| ## high.educBachelor                             | 1.207e+00  | 9.596e-01  | 1.258   |
| ## high.educHS Diploma/GED                       | -8.384e-01 | 9.914e-01  | -0.846  |
| ## high.educPost Graduate Degree                 | 4.017e-01  | 9.621e-01  | 0.418   |
| ## high.educSome College                         | 7.868e-01  | 9.153e-01  | 0.860   |
| ## hormone_scr_ert_mean:mOFC_posvsneg_feedback_z | 1.371e-02  | 1.276e-02  | 1.074   |
| ## Pr(> t )                                      |            |            |         |
| ## (Intercept)                                   | 0.32087    |            |         |
| ## PDS_score                                     | 0.00855 ** |            |         |
| ## hormone_sal_end_min_since_midnight            | 0.36116    |            |         |
| ## hormone_scr_ert_mean                          | 0.43006    |            |         |
| ## mOFC_posvsneg_feedback_z                      | 0.23431    |            |         |
| ## race.ethnicity.5levelBlack                    | 0.94860    |            |         |
| ## race.ethnicity.5levelMixed                    | 0.25294    |            |         |
| ## race.ethnicity.5levelOther                    | 0.75491    |            |         |
| ## race.ethnicity.5levelWhite                    | 0.17727    |            |         |
| ## demo_race_hispanic1                           | 0.88672    |            |         |
| ## interview_age                                 | 0.86673    |            |         |
| ## MRI_minus_hormone_date_time                   | 0.23953    |            |         |
| ## bmi                                           | 0.70329    |            |         |
| ## household.income[>=200K]                      | 0.00624 ** |            |         |
| ## household.income[100K-200K]                   | 0.01358 *  |            |         |
| ## household.income[12K-16K]                     | 0.78923    |            |         |
| ## household.income[16K-25K]                     | 0.55285    |            |         |
| ## household.income[25K-35K]                     | 0.42257    |            |         |
| ## household.income[35K-50K]                     | 0.58895    |            |         |
| ## household.income[50K-75K]                     | 0.06646 .  |            |         |
| ## household.income[5K-12K]                      | 0.68756    |            |         |
| ## household.income[75K-100K]                    | 0.01413 *  |            |         |
| ## high.educBachelor                             | 0.20848    |            |         |
| ## high.educHS Diploma/GED                       | 0.39788    |            |         |
| ## high.educPost Graduate Degree                 | 0.67634    |            |         |

```

## high.educSome College          0.39016
## hormone_scr_ert_mean:mOFC_posvsneg_feedback_z  0.28284
## ---
## Signif. codes:  0 '***' 0.001 '**' 0.01 '*' 0.05 '.' 0.1 ' ' 1
##
##
## R-sq.(adj) =  0.0344
## lmer.REML = 10372  Scale est. = 13.478    n = 1671

##
##               stdcoef    stdse
## X(Intercept)  0.000000000 0.00000000
## XPDS_score    0.067345545 0.02558020
## Xhormone_sal_end_min_since_midnight 0.023920122 0.02618752
## Xhormone_scr_ert_mean 0.019833090 0.02512801
## XmOFC_posvsneg_feedback_z -0.062620980 0.05263249
## Xrace.ethnicity.5levelBlack -0.004008230 0.06216375
## Xrace.ethnicity.5levelMixed 0.074435744 0.06508718
## Xrace.ethnicity.5levelOther 0.015223826 0.04875839
## Xrace.ethnicity.5levelWhite 0.116080203 0.08599897
## Xdemo_race_hispanic1 0.004260754 0.02990523
## Xinterview_age 0.004085447 0.02434111
## XMRI_minus_hormone_date_time 0.029371361 0.02496337
## Xbmi 0.009625529 0.02526679
## Xhousehold.income[>=200K] -0.179506417 0.06554840
## Xhousehold.income[100K-200K] -0.213227326 0.08630051
## Xhousehold.income[12K-16K] -0.008821688 0.03299569
## Xhousehold.income[16K-25K] 0.023550336 0.03967256
## Xhousehold.income[25K-35K] -0.033830005 0.04217300
## Xhousehold.income[35K-50K] -0.026458125 0.04895467
## Xhousehold.income[50K-75K] -0.116519316 0.06344580
## Xhousehold.income[5K-12K] 0.014355743 0.03568948
## Xhousehold.income[75K-100K] -0.163743436 0.06665846
## Xhigh.educBachelor 0.097775001 0.07770669
## Xhigh.educHS Diploma/GED -0.035346993 0.04179943
## Xhigh.educPost Graduate Degree 0.035652246 0.08538576
## Xhigh.educSome College 0.060772750 0.07070320
## Xhormone_scr_ert_mean:mOFC_posvsneg_feedback_z 0.056631944 0.05271474

```

#### 4.24 Model: CBCL internalizing factor ~ Testosterone x BIS-BAS RR + PDS

##### Female participants

```

##
## Family: gaussian
## Link function: identity
##
## Formula:
## cbcl_scr_syn_internal_r ~ PDS_score + hormone_sal_end_min_since_midnight +
##   hormone_scr_ert_mean * bisbas_ss_basm_rr + race.ethnicity.5level +
##   demo_race_hispanic + interview_age + bmi + household.income +
##   high.educ
##
## Parametric coefficients:

```

|                                           | Estimate   | Std. Error | t value | Pr(> t ) |
|-------------------------------------------|------------|------------|---------|----------|
| ## (Intercept)                            | -2.2881141 | 2.4859836  | -0.920  | 0.357463 |
| ## PDS_score                              | 0.6990737  | 0.1807471  | 3.868   | 0.000113 |
| ## hormone_sal_end_min_since_midnight     | 0.0005025  | 0.0007016  | 0.716   | 0.473926 |
| ## hormone_scr_ert_mean                   | 0.0355740  | 0.0271762  | 1.309   | 0.190669 |
| ## bisbas_ss_basm_rr                      | 0.1145067  | 0.1128078  | 1.015   | 0.310191 |
| ## race.ethnicity.5levelBlack             | -0.8215660 | 0.8157206  | -1.007  | 0.313968 |
| ## race.ethnicity.5levelMixed             | 1.0382209  | 0.7917347  | 1.311   | 0.189888 |
| ## race.ethnicity.5levelOther             | -0.4027054 | 0.9344986  | -0.431  | 0.666561 |
| ## race.ethnicity.5levelWhite             | 1.1360019  | 0.7349889  | 1.546   | 0.122347 |
| ## demo_race_hispanic1                    | -0.0254809 | 0.3617656  | -0.070  | 0.943854 |
| ## interview_age                          | 0.0293723  | 0.0162086  | 1.812   | 0.070103 |
| ## bmi                                    | 0.0467351  | 0.0324171  | 1.442   | 0.149537 |
| ## household.income[>=200K]               | -2.8694103 | 0.8677004  | -3.307  | 0.000959 |
| ## household.income[100K-200K]            | -1.9970589 | 0.8044696  | -2.482  | 0.013124 |
| ## household.income[12K-16K]              | -0.5572779 | 1.0414608  | -0.535  | 0.592641 |
| ## household.income[16K-25K]              | -1.4534527 | 0.8964733  | -1.621  | 0.105099 |
| ## household.income[25K-35K]              | -0.4815663 | 0.8406688  | -0.573  | 0.566815 |
| ## household.income[35K-50K]              | -1.4876909 | 0.8175625  | -1.820  | 0.068948 |
| ## household.income[50K-75K]              | -1.5588882 | 0.8037028  | -1.940  | 0.052554 |
| ## household.income[5K-12K]               | -0.5648003 | 0.9240168  | -0.611  | 0.541102 |
| ## household.income[75K-100K]             | -1.7545814 | 0.8157066  | -2.151  | 0.031587 |
| ## high.educBachelor                      | 1.2047441  | 0.7573489  | 1.591   | 0.111815 |
| ## high.educHS Diploma/GED                | 1.1642626  | 0.7608834  | 1.530   | 0.126127 |
| ## high.educPost Graduate Degree          | 1.6518817  | 0.7718419  | 2.140   | 0.032452 |
| ## high.educSome College                  | 1.5162082  | 0.7070525  | 2.144   | 0.032112 |
| ## hormone_scr_ert_mean:bisbas_ss_basm_rr | -0.0045127 | 0.0029733  | -1.518  | 0.129226 |
| ## (Intercept)                            |            |            |         |          |
| ## PDS_score                              |            |            | ***     |          |
| ## hormone_sal_end_min_since_midnight     |            |            |         |          |
| ## hormone_scr_ert_mean                   |            |            |         |          |
| ## bisbas_ss_basm_rr                      |            |            |         |          |
| ## race.ethnicity.5levelBlack             |            |            |         |          |
| ## race.ethnicity.5levelMixed             |            |            |         |          |
| ## race.ethnicity.5levelOther             |            |            |         |          |
| ## race.ethnicity.5levelWhite             |            |            |         |          |
| ## demo_race_hispanic1                    |            |            |         |          |
| ## interview_age                          |            |            | .       |          |
| ## bmi                                    |            |            |         |          |
| ## household.income[>=200K]               |            |            | ***     |          |
| ## household.income[100K-200K]            |            |            | *       |          |
| ## household.income[12K-16K]              |            |            |         |          |
| ## household.income[16K-25K]              |            |            |         |          |
| ## household.income[25K-35K]              |            |            |         |          |
| ## household.income[35K-50K]              |            |            | .       |          |
| ## household.income[50K-75K]              |            |            | .       |          |
| ## household.income[5K-12K]               |            |            |         |          |
| ## household.income[75K-100K]             |            |            | *       |          |
| ## high.educBachelor                      |            |            |         |          |
| ## high.educHS Diploma/GED                |            |            |         |          |
| ## high.educPost Graduate Degree          |            |            | *       |          |
| ## high.educSome College                  |            |            | *       |          |
| ## hormone_scr_ert_mean:bisbas_ss_basm_rr |            |            |         |          |

```

## ---
## Signif. codes:  0 '***' 0.001 '**' 0.01 '*' 0.05 '.' 0.1 ' ' 1
##
##
## R-sq.(adj) =  0.0253
## lmer.REML = 13484  Scale est. = 17.482    n = 2187

##
##                stdcoef      stdse
## X(Intercept)      0.00000000 0.00000000
## XPDS_score        0.093059152 0.02406065
## Xhormone_sal_end_min_since_midnight 0.016408451 0.02290941
## Xhormone_scr_ert_mean 0.108741152 0.08307109
## Xbisbas_ss_basm_rr 0.050625992 0.04987486
## Xrace.ethnicity.5levelBlack -0.053515989 0.05313522
## Xrace.ethnicity.5levelMixed 0.063037885 0.04807193
## Xrace.ethnicity.5levelOther -0.015626297 0.03626163
## Xrace.ethnicity.5levelWhite 0.099781223 0.06455807
## Xdemo_race_hispanic1 -0.001828068 0.02595403
## Xinterview_age    0.040742011 0.02248282
## Xbmi              0.032937296 0.02284646
## Xhousehold.income[>=200K] -0.167212031 0.05056438
## Xhousehold.income[100K-200K] -0.173707144 0.06997396
## Xhousehold.income[12K-16K] -0.015320787 0.02863203
## Xhousehold.income[16K-25K] -0.053346512 0.03290353
## Xhousehold.income[25K-35K] -0.021677075 0.03784160
## Xhousehold.income[35K-50K] -0.078755712 0.04328030
## Xhousehold.income[50K-75K] -0.099063571 0.05107336
## Xhousehold.income[5K-12K] -0.018845871 0.03083196
## Xhousehold.income[75K-100K] -0.117388027 0.05457381
## Xhigh.educBachelor 0.099435944 0.06250929
## Xhigh.educHS Diploma/GED 0.058218374 0.03804760
## Xhigh.educPost Graduate Degree 0.148219715 0.06925568
## Xhigh.educSome College 0.121149644 0.05649564
## Xhormone_scr_ert_mean:bisbas_ss_basm_rr -0.143813690 0.09475502

```

## Male participants

```

##
## Family: gaussian
## Link function: identity
##
## Formula:
## cbcl_scr_syn_internal_r ~ PDS_score + hormone_sal_end_min_since_midnight +
##   hormone_scr_ert_mean * bisbas_ss_basm_rr + race.ethnicity.5level +
##   demo_race_hispanic + interview_age + bmi + household.income +
##   high.educ
##
## Parametric coefficients:
##
##                Estimate Std. Error t value Pr(>|t|)
## (Intercept)      3.0700148  2.4497348   1.253 0.210257
## PDS_score         0.6333701  0.2242306   2.825 0.004773
## hormone_sal_end_min_since_midnight 0.0012404  0.0006839   1.814 0.069827
## hormone_scr_ert_mean 0.0310191  0.0295671   1.049 0.294236

```

```

## bisbas_ss_basm_rr          0.0097928  0.1120956  0.087 0.930392
## race.ethnicity.5levelBlack -0.6899456  0.8997476 -0.767 0.443265
## race.ethnicity.5levelMixed  1.0220473  0.8750018  1.168 0.242905
## race.ethnicity.5levelOther  0.1065064  0.9941366  0.107 0.914691
## race.ethnicity.5levelWhite  0.9929804  0.8232594  1.206 0.227879
## demo_race_hispanic1       -0.0383609  0.3580065 -0.107 0.914678
## interview_age              0.0033148  0.0150659  0.220 0.825873
## bmi                        0.0209773  0.0313558  0.669 0.503556
## household.income[>=200K]   -3.2145911  0.8513929 -3.776 0.000164
## household.income[100K-200K] -2.6523459  0.7969541 -3.328 0.000888
## household.income[12K-16K]  -0.2252179  1.0350648 -0.218 0.827769
## household.income[16K-25K]  -0.1541392  0.8546927 -0.180 0.856898
## household.income[25K-35K]  -0.7415642  0.8546364 -0.868 0.385650
## household.income[35K-50K]  -1.3023926  0.8133024 -1.601 0.109431
## household.income[50K-75K]  -1.8194922  0.7879161 -2.309 0.021017
## household.income[5K-12K]   -0.1888681  0.8817180 -0.214 0.830406
## household.income[75K-100K] -2.7715519  0.8118699 -3.414 0.000652
## high.educBachelor          1.1946798  0.7961832  1.501 0.133617
## high.educHS Diploma/GED   -0.8071015  0.7896952 -1.022 0.306867
## high.educPost Graduate Degree 0.4164022  0.8002683  0.520 0.602884
## high.educSome College      0.7595378  0.7586181  1.001 0.316828
## hormone_scr_ert_mean:bisbas_ss_basm_rr -0.0032405  0.0032246 -1.005 0.315027
##
## (Intercept)
## PDS_score                  **
## hormone_sal_end_min_since_midnight .
## hormone_scr_ert_mean
## bisbas_ss_basm_rr
## race.ethnicity.5levelBlack
## race.ethnicity.5levelMixed
## race.ethnicity.5levelOther
## race.ethnicity.5levelWhite
## demo_race_hispanic1
## interview_age
## bmi
## household.income[>=200K]   ***
## household.income[100K-200K] ***
## household.income[12K-16K]
## household.income[16K-25K]
## household.income[25K-35K]
## household.income[35K-50K]
## household.income[50K-75K]  *
## household.income[5K-12K]
## household.income[75K-100K] ***
## high.educBachelor
## high.educHS Diploma/GED
## high.educPost Graduate Degree
## high.educSome College
## hormone_scr_ert_mean:bisbas_ss_basm_rr
## ---
## Signif. codes:  0 '***' 0.001 '**' 0.01 '*' 0.05 '.' 0.1 ' ' 1
##
##
## R-sq.(adj) = 0.0341

```

```

## lmer.REML = 14711  Scale est. = 15.902  n = 2369

##
##          stdcoef      stdse
## X(Intercept)          0.00000000 0.00000000
## XPDS_score            0.061327058 0.02171148
## Xhormone_sal_end_min_since_midnight 0.040196153 0.02216053
## Xhormone_scr_ert_mean 0.083633350 0.07971845
## Xbisbas_ss_basm_rr    0.004054305 0.04640866
## Xrace.ethnicity.5levelBlack -0.040056173 0.05223665
## Xrace.ethnicity.5levelMixed 0.060434571 0.05173964
## Xrace.ethnicity.5levelOther 0.004083985 0.03812016
## Xrace.ethnicity.5levelWhite 0.082646942 0.06852086
## Xdemo_race_hispanic1 -0.002725647 0.02543733
## Xinterview_age        0.004541811 0.02064249
## Xbmi                   0.014320170 0.02140509
## Xhousehold.income[>=200K] -0.192045925 0.05086387
## Xhousehold.income[100K-200K] -0.223142445 0.06704792
## Xhousehold.income[12K-16K] -0.005733171 0.02634872
## Xhousehold.income[16K-25K] -0.005783425 0.03206875
## Xhousehold.income[25K-35K] -0.029726246 0.03425884
## Xhousehold.income[35K-50K] -0.064370055 0.04019703
## Xhousehold.income[50K-75K] -0.114973396 0.04978828
## Xhousehold.income[5K-12K] -0.006310667 0.02946092
## Xhousehold.income[75K-100K] -0.178731369 0.05235573
## Xhigh.educBachelor     0.095271849 0.06349304
## Xhigh.educHS Diploma/GED -0.038736911 0.03790149
## Xhigh.educPost Graduate Degree 0.036435608 0.07002427
## Xhigh.educSome College 0.059711999 0.05963969
## Xhormone_scr_ert_mean:bisbas_ss_basm_rr -0.089802562 0.08936072

```

#### 4.25 Model: CBCL internalizing factor ~ Testosterone x MID Reaction Time + PDS (large reward vs. neutral)

##### Female participants

```

##
## Family: gaussian
## Link function: identity
##
## Formula:
## cbcl_scr_syn_internal_r ~ PDS_score + hormone_sal_end_min_since_midnight +
##   hormone_scr_ert_mean * rt_diff_large_neutral_z + race.ethnicity.5level +
##   demo_race_hispanic + interview_age + bmi + household.income +
##   high.educ
##
## Parametric coefficients:
##
##          Estimate Std. Error t value
## (Intercept) -5.772e-01 2.483e+00 -0.232
## PDS_score    8.920e-01 1.992e-01 4.478
## hormone_sal_end_min_since_midnight -3.517e-05 7.567e-04 -0.046
## hormone_scr_ert_mean -5.736e-03 8.069e-03 -0.711
## rt_diff_large_neutral_z -1.598e-01 3.041e-01 -0.526
## race.ethnicity.5levelBlack -1.099e+00 8.703e-01 -1.263

```

```

## race.ethnicity.5levelMixed          5.522e-01  8.380e-01  0.659
## race.ethnicity.5levelOther          -7.529e-01  9.843e-01 -0.765
## race.ethnicity.5levelWhite           1.139e+00  7.764e-01  1.467
## demo_race_hispanic1                 -1.130e-01  3.896e-01 -0.290
## interview_age                         2.918e-02  1.758e-02  1.660
## bmi                                   4.115e-02  3.480e-02  1.183
## household.income[>=200K]            -2.402e+00  9.466e-01 -2.538
## household.income[100K-200K]         -1.540e+00  8.797e-01 -1.751
## household.income[12K-16K]           -4.218e-01  1.126e+00 -0.375
## household.income[16K-25K]           -1.289e+00  9.864e-01 -1.307
## household.income[25K-35K]            1.575e-01  9.182e-01  0.171
## household.income[35K-50K]           -9.507e-01  8.922e-01 -1.066
## household.income[50K-75K]           -1.323e+00  8.807e-01 -1.503
## household.income[5K-12K]            -1.639e-01  1.066e+00 -0.154
## household.income[75K-100K]          -1.372e+00  8.934e-01 -1.536
## high.educBachelor                    3.206e-01  8.244e-01  0.389
## high.educHS Diploma/GED              4.006e-01  8.373e-01  0.478
## high.educPost Graduate Degree         8.279e-01  8.396e-01  0.986
## high.educSome College                 9.495e-01  7.742e-01  1.227
## hormone_scr_ert_mean:rt_diff_large_neutral_z  1.016e-02  7.768e-03  1.307
## Pr(>|t|)
## (Intercept)                          0.8162
## PDS_score                             8.01e-06 ***
## hormone_sal_end_min_since_midnight    0.9629
## hormone_scr_ert_mean                  0.4773
## rt_diff_large_neutral_z              0.5993
## race.ethnicity.5levelBlack            0.2068
## race.ethnicity.5levelMixed            0.5100
## race.ethnicity.5levelOther            0.4444
## race.ethnicity.5levelWhite            0.1425
## demo_race_hispanic1                  0.7717
## interview_age                         0.0971 .
## bmi                                   0.2371
## household.income[>=200K]              0.0112 *
## household.income[100K-200K]           0.0801 .
## household.income[12K-16K]             0.7079
## household.income[16K-25K]             0.1914
## household.income[25K-35K]             0.8639
## household.income[35K-50K]             0.2868
## household.income[50K-75K]             0.1331
## household.income[5K-12K]              0.8778
## household.income[75K-100K]            0.1247
## high.educBachelor                     0.6974
## high.educHS Diploma/GED              0.6324
## high.educPost Graduate Degree         0.3242
## high.educSome College                 0.2202
## hormone_scr_ert_mean:rt_diff_large_neutral_z  0.1912
## ---
## Signif. codes:  0 '***' 0.001 '**' 0.01 '*' 0.05 '.' 0.1 ' ' 1
##
##
## R-sq.(adj) = 0.031
## lmer.REML = 11329 Scale est. = 16.647 n = 1843

```



```

##                                stdcoef      stdse
## X(Intercept)                   0.000000000 0.00000000
## XPDS_score                      0.117077632 0.02614633
## Xhormone_sal_end_min_since_midnight -0.001152505 0.02479984
## Xhormone_scr_ert_mean            -0.017592135 0.02474815
## Xrt_diff_large_neutral_z        -0.027686587 0.05268142
## Xrace.ethnicity.5levelBlack      -0.068608582 0.05433203
## Xrace.ethnicity.5levelMixed       0.034094540 0.05174338
## Xrace.ethnicity.5levelOther      -0.030099097 0.03934931
## Xrace.ethnicity.5levelWhite       0.099868864 0.06807508
## Xdemo_race_hispanic1            -0.008204901 0.02827822
## Xinterview_age                   0.040500830 0.02439684
## Xbmi                             0.029125839 0.02462504
## Xhousehold.income[>=200K]        -0.142935430 0.05631931
## Xhousehold.income[100K-200K]     -0.135438021 0.07735628
## Xhousehold.income[12K-16K]       -0.011600825 0.03096065
## Xhousehold.income[16K-25K]       -0.046895388 0.03587792
## Xhousehold.income[25K-35K]        0.007130854 0.04158204
## Xhousehold.income[35K-50K]       -0.050479931 0.04737427
## Xhousehold.income[50K-75K]       -0.083501059 0.05556474
## Xhousehold.income[5K-12K]        -0.004869232 0.03166977
## Xhousehold.income[75K-100K]      -0.091989757 0.05988925
## Xhigh.educBachelor               0.026648234 0.06852335
## Xhigh.educHS Diploma/GED         0.019529276 0.04082059
## Xhigh.educPost Graduate Degree    0.074936092 0.07598699
## Xhigh.educSome College            0.075545764 0.06159447
## Xhormone_scr_ert_mean:rt_diff_large_neutral_z 0.068770830 0.05260059

```

## Male participants

```

##
## Family: gaussian
## Link function: identity
##
## Formula:
## cbcl_scr_syn_internal_r ~ PDS_score + hormone_sal_end_min_since_midnight +
##   hormone_scr_ert_mean * rt_diff_large_neutral_z + race.ethnicity.5level +
##   demo_race_hispanic + interview_age + bmi + household.income +
##   high.educ
##
## Parametric coefficients:
##                                Estimate Std. Error t value
## (Intercept)                   1.4491934  2.5474438   0.569
## PDS_score                      0.8272036  0.2579718   3.207
## hormone_sal_end_min_since_midnight 0.0012260  0.0007532   1.628
## hormone_scr_ert_mean            0.0071055  0.0087393   0.813
## rt_diff_large_neutral_z        -0.0990673  0.3162520  -0.313
## race.ethnicity.5levelBlack      -0.6455596  1.0930777  -0.591
## race.ethnicity.5levelMixed       0.7692020  1.0685583   0.720
## race.ethnicity.5levelOther      -0.0886980  1.1854223  -0.075
## race.ethnicity.5levelWhite       0.8919913  1.0106820   0.883
## demo_race_hispanic1            -0.0063952  0.3983118  -0.016
## interview_age                   0.0036095  0.0165850   0.218

```

```

## bmi                0.0202513  0.0355351  0.570
## household.income[>=200K] -2.0381157  0.9758745 -2.089
## household.income[100K-200K] -1.6831721  0.9220691 -1.825
## household.income[12K-16K]  0.9724012  1.1672111  0.833
## household.income[16K-25K]  1.4242683  1.0083455  1.412
## household.income[25K-35K]  0.2867102  0.9927782  0.289
## household.income[35K-50K]  0.3022748  0.9461961  0.319
## household.income[50K-75K] -0.9179342  0.9157934 -1.002
## household.income[5K-12K]  0.8969878  1.0434052  0.860
## household.income[75K-100K] -1.6312908  0.9381027 -1.739
## high.educBachelor      1.4928792  0.9160442  1.630
## high.educHS Diploma/GED -0.0754513  0.9292278 -0.081
## high.educPost Graduate Degree 0.7462380  0.9168771  0.814
## high.educSome College  0.9084777  0.8715841  1.042
## hormone_scr_ert_mean:rt_diff_large_neutral_z 0.0013216  0.0090710  0.146
## Pr(>|t|)
## (Intercept)           0.56950
## PDS_score              0.00137 **
## hormone_sal_end_min_since_midnight 0.10376
## hormone_scr_ert_mean  0.41629
## rt_diff_large_neutral_z 0.75412
## race.ethnicity.5levelBlack 0.55487
## race.ethnicity.5levelMixed 0.47171
## race.ethnicity.5levelOther 0.94036
## race.ethnicity.5levelWhite 0.37758
## demo_race_hispanic1     0.98719
## interview_age           0.82773
## bmi                    0.56882
## household.income[>=200K] 0.03689 *
## household.income[100K-200K] 0.06810 .
## household.income[12K-16K]  0.40490
## household.income[16K-25K]  0.15797
## household.income[25K-35K]  0.77277
## household.income[35K-50K]  0.74941
## household.income[50K-75K]  0.31631
## household.income[5K-12K]  0.39008
## household.income[75K-100K] 0.08221 .
## high.educBachelor      0.10333
## high.educHS Diploma/GED 0.93529
## high.educPost Graduate Degree 0.41581
## high.educSome College  0.29739
## hormone_scr_ert_mean:rt_diff_large_neutral_z 0.88418
## ---
## Signif. codes:  0 '***' 0.001 '**' 0.01 '*' 0.05 '.' 0.1 ' ' 1
##
##
## R-sq.(adj) = 0.0337
## lmer.REML = 11805 Scale est. = 12.697 n = 1904

##                stdcoef      stdse
## X(Intercept)    0.000000000 0.00000000
## XPDS_score      0.077413535 0.02414220
## Xhormone_sal_end_min_since_midnight 0.0396701359 0.02437190
## Xhormone_scr_ert_mean 0.0191104178 0.02350451

```

```

## Xrt_diff_large_neutral_z -0.0164892275 0.05263847
## Xrace.ethnicity.5levelBlack -0.0357446050 0.06052366
## Xrace.ethnicity.5levelMixed 0.0449409732 0.06243100
## Xrace.ethnicity.5levelOther -0.0034067416 0.04553008
## Xrace.ethnicity.5levelWhite 0.0729314741 0.08263593
## Xdemo_race_hispanic1 -0.0004503044 0.02804633
## Xinterview_age 0.0049831711 0.02289663
## Xbmi 0.0135409712 0.02376048
## Xhousehold.income[>=200K] -0.1239435790 0.05934569
## Xhousehold.income[100K-200K] -0.1431088750 0.07839738
## Xhousehold.income[12K-16K] 0.0249288741 0.02992310
## Xhousehold.income[16K-25K] 0.0514070005 0.03639484
## Xhousehold.income[25K-35K] 0.0112416936 0.03892610
## Xhousehold.income[35K-50K] 0.0147831436 0.04627496
## Xhousehold.income[50K-75K] -0.0578671407 0.05773219
## Xhousehold.income[5K-12K] 0.0281317142 0.03272372
## Xhousehold.income[75K-100K] -0.1059380619 0.06092156
## Xhigh.educBachelor 0.1188991321 0.07295758
## Xhigh.educHS Diploma/GED -0.0033313505 0.04102759
## Xhigh.educPost Graduate Degree 0.0661862719 0.08132081
## Xhigh.educSome College 0.0707945558 0.06791957
## Xhormone_scr_ert_mean:rt_diff_large_neutral_z 0.0076911529 0.05279068

```

#### 4.26 Model: CBCL internalizing factor ~ Testosterone x MID Reaction Time + PDS (large vs. small reward)

##### Female participants

```

##
## Family: gaussian
## Link function: identity
##
## Formula:
## cbcl_scr_syn_internal_r ~ PDS_score + hormone_sal_end_min_since_midnight +
##   hormone_scr_ert_mean * rt_diff_large_small_z + race.ethnicity.5level +
##   demo_race_hispanic + interview_age + bmi + household.income +
##   high.educ
##
## Parametric coefficients:
##
##           Estimate Std. Error t value
## (Intercept) -5.450e-01 2.484e+00 -0.219
## PDS_score 8.954e-01 1.992e-01 4.494
## hormone_sal_end_min_since_midnight -7.833e-05 7.564e-04 -0.104
## hormone_scr_ert_mean -5.047e-03 8.059e-03 -0.626
## rt_diff_large_small_z 2.202e-02 2.861e-01 0.077
## race.ethnicity.5levelBlack -1.075e+00 8.705e-01 -1.235
## race.ethnicity.5levelMixed 5.787e-01 8.384e-01 0.690
## race.ethnicity.5levelOther -7.290e-01 9.845e-01 -0.740
## race.ethnicity.5levelWhite 1.165e+00 7.763e-01 1.501
## demo_race_hispanic1 -1.366e-01 3.898e-01 -0.350
## interview_age 2.953e-02 1.757e-02 1.681
## bmi 3.902e-02 3.483e-02 1.120
## household.income[>=200K] -2.452e+00 9.469e-01 -2.589

```

```

## household.income[100K-200K]          -1.601e+00  8.794e-01  -1.821
## household.income[12K-16K]            -4.366e-01  1.126e+00  -0.388
## household.income[16K-25K]            -1.353e+00  9.867e-01  -1.372
## household.income[25K-35K]             1.457e-01  9.180e-01   0.159
## household.income[35K-50K]            -1.012e+00  8.924e-01  -1.134
## household.income[50K-75K]            -1.375e+00  8.809e-01  -1.561
## household.income[5K-12K]             -1.671e-01  1.067e+00  -0.157
## household.income[75K-100K]           -1.433e+00  8.933e-01  -1.605
## high.educBachelor                     3.350e-01  8.243e-01   0.406
## high.educHS Diploma/GED              3.851e-01  8.377e-01   0.460
## high.educPost Graduate Degree         8.283e-01  8.405e-01   0.986
## high.educSome College                 9.683e-01  7.745e-01   1.250
## hormone_scr_ert_mean:rt_diff_large_small_z  6.434e-03  7.626e-03   0.844
##                                         Pr(>|t|)
## (Intercept)                           0.8263
## PDS_score                              7.42e-06 ***
## hormone_sal_end_min_since_midnight     0.9175
## hormone_scr_ert_mean                   0.5312
## rt_diff_large_small_z                  0.9387
## race.ethnicity.5levelBlack              0.2169
## race.ethnicity.5levelMixed              0.4901
## race.ethnicity.5levelOther              0.4591
## race.ethnicity.5levelWhite              0.1336
## demo_race_hispanic1                    0.7261
## interview_age                           0.0929 .
## bmi                                     0.2627
## household.income[>=200K]                0.0097 **
## household.income[100K-200K]             0.0688 .
## household.income[12K-16K]               0.6981
## household.income[16K-25K]               0.1703
## household.income[25K-35K]               0.8739
## household.income[35K-50K]               0.2569
## household.income[50K-75K]               0.1187
## household.income[5K-12K]                0.8755
## household.income[75K-100K]              0.1088
## high.educBachelor                       0.6845
## high.educHS Diploma/GED                 0.6458
## high.educPost Graduate Degree            0.3245
## high.educSome College                   0.2114
## hormone_scr_ert_mean:rt_diff_large_small_z  0.3989
## ---
## Signif. codes:  0 '***' 0.001 '**' 0.01 '*' 0.05 '.' 0.1 ' ' 1
##
##
## R-sq.(adj) =  0.0315
## lmer.REML = 11329  Scale est. = 16.636  n = 1843

##                                     stdcoef      stdse
## X(Intercept)                        0.000000000  0.000000000
## XPDS_score                           0.117534000  0.02615223
## Xhormone_sal_end_min_since_midnight  -0.002567061  0.02478714
## Xhormone_scr_ert_mean                 -0.015480570  0.02471752
## Xrt_diff_large_small_z                0.003976742  0.05167000
## Xrace.ethnicity.5levelBlack           -0.067117095  0.05433948

```

```

## Xrace.ethnicity.5levelMixed          0.035731363 0.05176827
## Xrace.ethnicity.5levelOther          -0.029143515 0.03935950
## Xrace.ethnicity.5levelWhite          0.102141185 0.06806825
## Xdemo_race_hispanic1                 -0.009913033 0.02829184
## Xinterview_age                       0.040989615 0.02438027
## Xbmi                                  0.027613401 0.02464817
## Xhousehold.income[>=200K]           -0.145870296 0.05633914
## Xhousehold.income[100K-200K]        -0.140781047 0.07733092
## Xhousehold.income[12K-16K]          -0.012008415 0.03095813
## Xhousehold.income[16K-25K]          -0.049228650 0.03588798
## Xhousehold.income[25K-35K]           0.006599697 0.04157680
## Xhousehold.income[35K-50K]          -0.053738480 0.04738205
## Xhousehold.income[50K-75K]          -0.086760785 0.05557737
## Xhousehold.income[5K-12K]           -0.004964232 0.03168658
## Xhousehold.income[75K-100K]         -0.096086507 0.05988096
## Xhigh.educBachelor                   0.027845313 0.06851535
## Xhigh.educHS Diploma/GED            0.018777254 0.04084244
## Xhigh.educPost Graduate Degree       0.074971309 0.07607300
## Xhigh.educSome College               0.077037894 0.06162080
## Xhormone_scr_ert_mean:rt_diff_large_small_z 0.043645635 0.05172939

```

## Male participants

```

##
## Family: gaussian
## Link function: identity
##
## Formula:
## cbcl_scr_syn_internal_r ~ PDS_score + hormone_sal_end_min_since_midnight +
##   hormone_scr_ert_mean * rt_diff_large_small_z + race.ethnicity.5level +
##   demo_race_hispanic + interview_age + bmi + household.income +
##   high.educ
##
## Parametric coefficients:
##
##           Estimate Std. Error t value
## (Intercept) 1.4989448  2.5458407  0.589
## PDS_score    0.8301503  0.2582905  3.214
## hormone_sal_end_min_since_midnight 0.0012165  0.0007536  1.614
## hormone_scr_ert_mean 0.0070965  0.0087423  0.812
## rt_diff_large_small_z 0.0172049  0.3187302  0.054
## race.ethnicity.5levelBlack -0.6407558  1.0929680 -0.586
## race.ethnicity.5levelMixed  0.7657586  1.0678277  0.717
## race.ethnicity.5levelOther -0.0797751  1.1851105 -0.067
## race.ethnicity.5levelWhite  0.8962683  1.0099723  0.887
## demo_race_hispanic1 -0.0037019  0.3986543 -0.009
## interview_age 0.0032499  0.0165670  0.196
## bmi          0.0200622  0.0355305  0.565
## household.income[>=200K] -2.0481496  0.9757093 -2.099
## household.income[100K-200K] -1.6913308  0.9225889 -1.833
## household.income[12K-16K]  0.9687013  1.1673428  0.830
## household.income[16K-25K]  1.4190042  1.0099180  1.405
## household.income[25K-35K]  0.2792207  0.9940798  0.281
## household.income[35K-50K]  0.2925003  0.9458280  0.309

```

```

## household.income[50K-75K] -0.9274208 0.9154502 -1.013
## household.income[5K-12K] 0.8966287 1.0435544 0.859
## household.income[75K-100K] -1.6395871 0.9385216 -1.747
## high.educBachelor 1.4946722 0.9154577 1.633
## high.educHS Diploma/GED -0.0670181 0.9280507 -0.072
## high.educPost Graduate Degree 0.7522253 0.9163482 0.821
## high.educSome College 0.9148788 0.8705160 1.051
## hormone_scr_ert_mean:rt_diff_large_small_z -0.0006893 0.0093227 -0.074
## Pr(>|t|)
## (Intercept) 0.55608
## PDS_score 0.00133 **
## hormone_sal_end_min_since_midnight 0.10662
## hormone_scr_ert_mean 0.41705
## rt_diff_large_small_z 0.95696
## race.ethnicity.5levelBlack 0.55778
## race.ethnicity.5levelMixed 0.47339
## race.ethnicity.5levelOther 0.94634
## race.ethnicity.5levelWhite 0.37497
## demo_race_hispanic1 0.99259
## interview_age 0.84450
## bmi 0.57238
## household.income[>=200K] 0.03594 *
## household.income[100K-200K] 0.06692 .
## household.income[12K-16K] 0.40674
## household.income[16K-25K] 0.16017
## household.income[25K-35K] 0.77883
## household.income[35K-50K] 0.75716
## household.income[50K-75K] 0.31115
## household.income[5K-12K] 0.39034
## household.income[75K-100K] 0.08080 .
## high.educBachelor 0.10270
## high.educHS Diploma/GED 0.94244
## high.educPost Graduate Degree 0.41181
## high.educSome College 0.29341
## hormone_scr_ert_mean:rt_diff_large_small_z 0.94107
## ---
## Signif. codes: 0 '***' 0.001 '**' 0.01 '*' 0.05 '.' 0.1 ' ' 1
##
##
## R-sq.(adj) = 0.0336
## lmer.REML = 11805 Scale est. = 12.694 n = 1904

## stdcoef stdse
## X(Intercept) 0.000000000 0.00000000
## XPDS_score 0.0776893021 0.02417202
## Xhormone_sal_end_min_since_midnight 0.0393629908 0.02438324
## Xhormone_scr_ert_mean 0.0190860990 0.02351277
## Xrt_diff_large_small_z 0.0028234074 0.05230519
## Xrace.ethnicity.5levelBlack -0.0354786208 0.06051759
## Xrace.ethnicity.5levelMixed 0.0447397906 0.06238831
## Xrace.ethnicity.5levelOther -0.0030640267 0.04551811
## Xrace.ethnicity.5levelWhite 0.0732811735 0.08257790
## Xdemo_race_hispanic1 -0.0002606616 0.02807045
## Xinterview_age 0.0044867315 0.02287172

```

|                                                |               |            |
|------------------------------------------------|---------------|------------|
| ## Xbmi                                        | 0.0134145728  | 0.02375740 |
| ## Xhousehold.income[>=200K]                   | -0.1245537650 | 0.05933564 |
| ## Xhousehold.income[100K-200K]                | -0.1438025608 | 0.07844157 |
| ## Xhousehold.income[12K-16K]                  | 0.0248340228  | 0.02992648 |
| ## Xhousehold.income[16K-25K]                  | 0.0512169981  | 0.03645160 |
| ## Xhousehold.income[25K-35K]                  | 0.0109480371  | 0.03897713 |
| ## Xhousehold.income[35K-50K]                  | 0.0143051115  | 0.04625695 |
| ## Xhousehold.income[50K-75K]                  | -0.0584651857 | 0.05771055 |
| ## Xhousehold.income[5K-12K]                   | 0.0281204498  | 0.03272840 |
| ## Xhousehold.income[75K-100K]                 | -0.1064768382 | 0.06094877 |
| ## Xhigh.educBachelor                          | 0.1190419305  | 0.07291087 |
| ## Xhigh.educHS Diploma/GED                    | -0.0029590052 | 0.04097562 |
| ## Xhigh.educPost Graduate Degree              | 0.0667173065  | 0.08127390 |
| ## Xhigh.educSome College                      | 0.0712933728  | 0.06783633 |
| ## Xhormone_scr_ert_mean:rt_diff_large_small_z | -0.0038713261 | 0.05235798 |
